# Supplementary material for: The rise and fall of the ancient northern pike master sex-determining gene
Source: eLife. 2021 Jan 28;10:e62858. doi: 10.7554/eLife.62858 (PMC7870143; doi:10.7554/eLife.62858)
Supplement: Figure 3—source data 1. [file elife-62858-fig3-data1.csv]

Males	Females	Markers	P	Signif
0	1	4332	1	False
0	2	383	0.513187	False
0	3	136	0.27095	False
0	4	44	0.145827	False
0	5	24	0.0786789	False
0	6	21	0.0421715	False
0	7	2	0.0223248	False
0	8	3	0.0116225	False
0	9	0	0.00592945	False
0	10	0	0.00295511	False
0	11	2	0.00143446	False
0	12	0	0.000676216	False
0	13	0	0.000308646	False
0	14	0	0.000135974	False
0	15	0	5.7627e-05	False
0	16	0	2.34103e-05	False
0	17	0	9.08038e-06	False
0	18	0	3.3485e-06	False
0	19	0	1.16838e-06	False
0	20	0	3.83721e-07	True
0	21	0	1.17919e-07	True
0	22	0	3.36825e-08	True
0	23	0	8.87634e-09	True
0	24	0	2.13984e-09	True
0	25	0	4.67347e-10	True
0	26	0	9.14514e-11	True
0	27	0	1.58299e-11	True
0	28	0	2.3882e-12	True
1	0	3014	0.939167	False
1	1	607	1	False
1	2	310	1	False
1	3	165	0.679795	False
1	4	92	0.413908	False
1	5	38	0.244674	False
1	6	19	0.140999	False
1	7	10	0.0792967	False
1	8	7	0.0435076	False
1	9	2	0.0232631	False
1	10	0	0.0121027	False
1	11	1	0.00611472	False
1	12	1	0.00299355	False
1	13	0	0.00141655	False
1	14	1	0.000646106	False
1	15	0	0.000283178	False
1	16	0	0.000118853	False
1	17	0	4.75871e-05	False
1	18	0	1.80987e-05	False
1	19	0	6.5074e-06	False
1	20	0	2.20009e-06	False
1	21	0	6.95215e-07	True
1	22	0	2.03925e-07	True
1	23	0	5.50954e-08	True
1	24	0	1.35892e-08	True
1	25	0	3.0289e-09	True
1	26	0	6.02951e-10	True
1	27	0	1.05748e-10	True
1	28	0	1.60825e-11	True
2	0	261	0.413726	False
2	1	247	0.910558	False
2	2	224	1	False
2	3	146	1	False
2	4	125	0.768038	False
2	5	66	0.509658	False
2	6	47	0.324056	False
2	7	28	0.19846	False
2	8	25	0.117395	False
2	9	8	0.0671537	False
2	10	5	0.0371523	False
2	11	1	0.0198662	False
2	12	0	0.0102542	False
2	13	1	0.00510009	False
2	14	2	0.00243875	False
2	15	0	0.00111816	False
2	16	0	0.000490031	False
2	17	0	0.000204528	False
2	18	0	8.09637e-05	False
2	19	0	3.02543e-05	False
2	20	0	1.06145e-05	False
2	21	0	3.47508e-06	False
2	22	0	1.05421e-06	False
2	23	0	2.93962e-07	True
2	24	0	7.46508e-08	True
2	25	0	1.70807e-08	True
2	26	0	3.47783e-09	True
2	27	0	6.21065e-10	True
2	28	0	9.56291e-11	True
3	0	81	0.192547	False
3	1	99	0.516599	False
3	2	129	0.887006	False
3	3	125	1	False
3	4	98	1	False
3	5	74	0.827792	False
3	6	56	0.580197	False
3	7	41	0.388403	False
3	8	24	0.249258	False
3	9	20	0.153693	False
3	10	6	0.0911556	False
3	11	6	0.0520141	False
3	12	2	0.0285385	False
3	13	0	0.0150383	False
3	14	1	0.00759719	False
3	15	0	0.00367109	False
3	16	0	0.00169194	False
3	17	0	0.000741211	False
3	18	0	0.000307416	False
3	19	0	0.000120147	False
3	20	0	4.40109e-05	False
3	21	0	1.50163e-05	False
3	22	0	4.73794e-06	False
3	23	0	1.37097e-06	False
3	24	0	3.60313e-07	True
3	25	0	8.50465e-08	True
3	26	0	1.77925e-08	True
3	27	0	3.2486e-09	True
3	28	0	5.08237e-10	True
4	0	21	0.0909739	False
4	1	44	0.278604	False
4	2	80	0.555268	False
4	3	94	0.866051	False
4	4	97	1	False
4	5	98	1	False
4	6	71	0.873484	False
4	7	47	0.63574	False
4	8	37	0.441818	False
4	9	24	0.29381	False
4	10	22	0.187204	False
4	11	20	0.114344	False
4	12	6	0.0669404	False
4	13	4	0.0375293	False
4	14	5	0.0201202	False
4	15	0	0.0102941	False
4	16	1	0.005013	False
4	17	0	0.00231604	False
4	18	0	0.0010112	False
4	19	0	0.00041531	False
4	20	0	0.000159585	False
4	21	0	5.7009e-05	False
4	22	0	1.8794e-05	False
4	23	0	5.66854e-06	False
4	24	0	1.5485e-06	False
4	25	0	3.78609e-07	True
4	26	0	8.17026e-08	True
4	27	0	1.53053e-08	True
4	28	0	2.44014e-09	True
5	0	17	0.042885	False
5	1	21	0.144751	False
5	2	48	0.326401	False
5	3	57	0.571672	False
5	4	90	0.846502	False
5	5	58	1	False
5	6	72	1	False
5	7	58	0.911103	False
5	8	45	0.68161	False
5	9	38	0.487196	False
5	10	26	0.332983	False
5	11	17	0.217691	False
5	12	24	0.136105	False
5	13	10	0.0813207	False
5	14	3	0.0463705	False
5	15	6	0.0251864	False
5	16	1	0.0129981	False
5	17	3	0.00635352	False
5	18	3	0.00293016	False
5	19	1	0.00126913	False
5	20	0	0.000513426	False
5	21	0	0.00019275	False
5	22	0	6.66419e-05	False
5	23	0	2.10301e-05	False
5	24	0	5.99346e-06	False
5	25	0	1.52341e-06	False
5	26	0	3.40246e-07	True
5	27	0	6.55942e-08	True
5	28	0	1.06837e-08	True
6	0	6	0.0199777	False
6	1	14	0.0727971	False
6	2	27	0.182134	False
6	3	30	0.354219	False
6	4	45	0.577309	False
6	5	54	0.827718	False
6	6	53	1	False
6	7	46	1	False
6	8	54	0.943672	False
6	9	53	0.720879	False
6	10	48	0.526531	False
6	11	21	0.367618	False
6	12	12	0.245215	False
6	13	9	0.156126	False
6	14	9	0.0947482	False
6	15	11	0.0547008	False
6	16	5	0.0299674	False
6	17	3	0.0155298	False
6	18	0	0.00758332	False
6	19	4	0.00347296	False
6	20	0	0.0014834	False
6	21	0	0.000587014	False
6	22	0	0.000213522	False
6	23	0	7.07261e-05	False
6	24	0	2.10972e-05	False
6	25	0	5.59256e-06	False
6	26	0	1.29666e-06	False
6	27	0	2.57949e-07	True
6	28	0	4.30125e-08	True
7	0	10	0.00913892	False
7	1	4	0.03548	False
7	2	10	0.0970572	False
7	3	14	0.207452	False
7	4	33	0.370189	False
7	5	41	0.576682	False
7	6	56	0.809297	False
7	7	57	1	False
7	8	46	1	False
7	9	59	0.972935	False
7	10	30	0.755468	False
7	11	25	0.561224	False
7	12	12	0.398425	False
7	13	15	0.26994	False
7	14	13	0.174251	False
7	15	6	0.106943	False
7	16	10	0.0622383	False
7	17	0	0.0342352	False
7	18	1	0.0177287	False
7	19	0	0.00860177	False
7	20	0	0.00388783	False
7	21	0	0.00162575	False
7	22	0	0.000623822	False
7	23	0	0.000217508	False
7	24	0	6.8108e-05	False
7	25	0	1.88843e-05	False
7	26	0	4.55793e-06	False
7	27	0	9.37944e-07	False
7	28	0	1.60417e-07	True
8	0	1	0.0040858	False
8	1	2	0.0167502	False
8	2	6	0.0495432	False
8	3	4	0.115346	False
8	4	16	0.224093	False
8	5	22	0.37839	False
8	6	55	0.57191	False
8	7	42	0.790947	False
8	8	45	1	False
8	9	42	1	False
8	10	42	1	False
8	11	33	0.786658	False
8	12	23	0.592281	False
8	13	29	0.425976	False
8	14	17	0.292043	False
8	15	23	0.190397	False
8	16	20	0.1177	False
8	17	11	0.0687548	False
8	18	1	0.0377954	False
8	19	1	0.0194548	False
8	20	0	0.00932131	False
8	21	1	0.00412749	False
8	22	0	0.00167469	False
8	23	0	0.000616237	False
8	24	0	0.000203111	False
8	25	0	5.90678e-05	False
8	26	0	1.48808e-05	False
8	27	0	3.17503e-06	False
8	28	0	5.57898e-07	True
9	0	4	0.00177806	False
9	1	0	0.00764929	False
9	2	1	0.0242528	False
9	3	0	0.0610413	False
9	4	10	0.128411	False
9	5	22	0.234297	False
9	6	29	0.381073	False
9	7	32	0.564099	False
9	8	41	0.772434	False
9	9	31	0.991253	False
9	10	39	1	False
9	11	40	1	False
9	12	37	0.815356	False
9	13	29	0.620448	False
9	14	21	0.450718	False
9	15	21	0.311677	False
9	16	14	0.204506	False
9	17	9	0.12685	False
9	18	14	0.0740544	False
9	19	0	0.0404787	False
9	20	1	0.0205878	False
9	21	0	0.0096707	False
9	22	2	0.00415786	False
9	23	0	0.00161856	False
9	24	0	0.000563004	False
9	25	0	0.000172195	False
9	26	0	4.53984e-05	False
9	27	0	1.00664e-05	False
9	28	0	1.82007e-06	False
10	0	7	0.000750444	False
10	1	0	0.0033723	False
10	2	1	0.0113843	False
10	3	3	0.0307779	False
10	4	5	0.0697575	False
10	5	7	0.137078	False
10	6	18	0.239536	False
10	7	28	0.379564	False
10	8	27	0.553859	False
10	9	33	0.753553	False
10	10	56	0.965827	False
10	11	29	1	False
10	12	25	1	False
10	13	39	0.842239	False
10	14	33	0.646292	False
10	15	27	0.472997	False
10	16	21	0.328955	False
10	17	13	0.216513	False
10	18	12	0.134231	False
10	19	7	0.0779562	False
10	20	4	0.0421336	False
10	21	1	0.0210272	False
10	22	1	0.00959853	False
10	23	0	0.00396199	False
10	24	0	0.00145819	False
10	25	0	0.000470327	False
10	26	0	0.000130118	False
10	27	0	3.00538e-05	False
10	28	0	5.59986e-06	False
11	0	2	0.000306101	False
11	1	0	0.00143184	False
11	2	4	0.00511872	False
11	3	3	0.014785	False
11	4	1	0.0359404	False
11	5	14	0.0758106	False
11	6	8	0.142048	False
11	7	29	0.240791	False
11	8	19	0.37468	False
11	9	29	0.541525	False
11	10	21	0.734107	False
11	11	31	0.941205	False
11	12	36	1	False
11	13	27	1	False
11	14	35	0.86784	False
11	15	25	0.670255	False
11	16	28	0.493071	False
11	17	28	0.343937	False
11	18	20	0.226325	False
11	19	15	0.139673	False
11	20	5	0.0802806	False
11	21	4	0.0426224	False
11	22	2	0.0206948	False
11	23	1	0.00907823	False
11	24	0	0.00354453	False
11	25	0	0.00120909	False
11	26	0	0.000352005	False
11	27	0	8.49033e-05	False
11	28	0	1.63281e-05	False
12	0	2	0.000120241	False
12	1	0	0.000583868	False
12	2	14	0.00220067	False
12	3	0	0.00676002	False
12	4	1	0.0175532	False
12	5	4	0.0396176	False
12	6	1	0.0794243	False
12	7	8	0.143871	False
12	8	11	0.238727	False
12	9	13	0.366928	False
12	10	21	0.527262	False
12	11	29	0.713892	False
12	12	28	0.916931	False
12	13	30	1	False
12	14	34	1	False
12	15	36	0.892605	False
12	16	23	0.692691	False
12	17	35	0.511123	False
12	18	18	0.356621	False
12	19	15	0.233801	False
12	20	11	0.142971	False
12	21	12	0.0808387	False
12	22	5	0.0418197	False
12	23	1	0.0195402	False
12	24	1	0.00811564	False
12	25	0	0.00293664	False
12	26	0	0.000902497	False
12	27	0	0.000227946	False
12	28	0	4.53208e-05	False
13	0	0	4.53208e-05	False
13	1	0	0.000227946	False
13	2	5	0.000902497	False
13	3	1	0.00293664	False
13	4	0	0.00811564	False
13	5	1	0.0195402	False
13	6	1	0.0418197	False
13	7	7	0.0808387	False
13	8	7	0.142971	False
13	9	7	0.233801	False
13	10	13	0.356621	False
13	11	26	0.511123	False
13	12	25	0.692691	False
13	13	32	0.892605	False
13	14	37	1	False
13	15	37	1	False
13	16	36	0.916931	False
13	17	28	0.713892	False
13	18	27	0.527262	False
13	19	25	0.366928	False
13	20	11	0.238727	False
13	21	9	0.143871	False
13	22	6	0.0794243	False
13	23	3	0.0396176	False
13	24	3	0.0175532	False
13	25	1	0.00676002	False
13	26	0	0.00220067	False
13	27	0	0.000583868	False
13	28	0	0.000120241	False
14	0	1	1.63281e-05	False
14	1	0	8.49033e-05	False
14	2	0	0.000352005	False
14	3	0	0.00120909	False
14	4	1	0.00354453	False
14	5	0	0.00907823	False
14	6	1	0.0206948	False
14	7	2	0.0426224	False
14	8	3	0.0802806	False
14	9	7	0.139673	False
14	10	10	0.226325	False
14	11	13	0.343937	False
14	12	25	0.493071	False
14	13	14	0.670255	False
14	14	30	0.86784	False
14	15	26	1	False
14	16	42	1	False
14	17	28	0.941205	False
14	18	24	0.734107	False
14	19	37	0.541525	False
14	20	26	0.37468	False
14	21	19	0.240791	False
14	22	11	0.142048	False
14	23	4	0.0758106	False
14	24	2	0.0359404	False
14	25	2	0.014785	False
14	26	0	0.00511872	False
14	27	0	0.00143184	False
14	28	0	0.000306101	False
15	0	0	5.59986e-06	False
15	1	0	3.00538e-05	False
15	2	0	0.000130118	False
15	3	0	0.000470327	False
15	4	0	0.00145819	False
15	5	0	0.00396199	False
15	6	0	0.00959853	False
15	7	2	0.0210272	False
15	8	0	0.0421336	False
15	9	2	0.0779562	False
15	10	6	0.134231	False
15	11	10	0.216513	False
15	12	22	0.328955	False
15	13	14	0.472997	False
15	14	22	0.646292	False
15	15	27	0.842239	False
15	16	32	1	False
15	17	23	1	False
15	18	30	0.965827	False
15	19	33	0.753553	False
15	20	21	0.553859	False
15	21	21	0.379564	False
15	22	16	0.239536	False
15	23	12	0.137078	False
15	24	12	0.0697575	False
15	25	3	0.0307779	False
15	26	0	0.0113843	False
15	27	1	0.0033723	False
15	28	0	0.000750444	False
16	0	1	1.82007e-06	False
16	1	0	1.00664e-05	False
16	2	0	4.53984e-05	False
16	3	0	0.000172195	False
16	4	1	0.000563004	False
16	5	0	0.00161856	False
16	6	0	0.00415786	False
16	7	0	0.0096707	False
16	8	3	0.0205878	False
16	9	4	0.0404787	False
16	10	1	0.0740544	False
16	11	3	0.12685	False
16	12	9	0.204506	False
16	13	10	0.311677	False
16	14	17	0.450718	False
16	15	25	0.620448	False
16	16	39	0.815356	False
16	17	24	1	False
16	18	30	1	False
16	19	40	0.991253	False
16	20	24	0.772434	False
16	21	34	0.564099	False
16	22	25	0.381073	False
16	23	20	0.234297	False
16	24	18	0.128411	False
16	25	6	0.0610413	False
16	26	3	0.0242528	False
16	27	1	0.00764929	False
16	28	0	0.00177806	False
17	0	1	5.57898e-07	True
17	1	0	3.17503e-06	False
17	2	0	1.48808e-05	False
17	3	0	5.90678e-05	False
17	4	0	0.000203111	False
17	5	0	0.000616237	False
17	6	0	0.00167469	False
17	7	0	0.00412749	False
17	8	0	0.00932131	False
17	9	1	0.0194548	False
17	10	1	0.0377954	False
17	11	1	0.0687548	False
17	12	4	0.1177	False
17	13	4	0.190397	False
17	14	8	0.292043	False
17	15	9	0.425976	False
17	16	16	0.592281	False
17	17	20	0.786658	False
17	18	26	1	False
17	19	39	1	False
17	20	43	1	False
17	21	31	0.790947	False
17	22	33	0.57191	False
17	23	28	0.37839	False
17	24	17	0.224093	False
17	25	15	0.115346	False
17	26	15	0.0495432	False
17	27	5	0.0167502	False
17	28	1	0.0040858	False
18	0	1	1.60417e-07	True
18	1	0	9.37944e-07	False
18	2	0	4.55793e-06	False
18	3	0	1.88843e-05	False
18	4	0	6.8108e-05	False
18	5	0	0.000217508	False
18	6	0	0.000623822	False
18	7	0	0.00162575	False
18	8	0	0.00388783	False
18	9	1	0.00860177	False
18	10	1	0.0177287	False
18	11	0	0.0342352	False
18	12	4	0.0622383	False
18	13	3	0.106943	False
18	14	5	0.174251	False
18	15	13	0.26994	False
18	16	17	0.398425	False
18	17	25	0.561224	False
18	18	27	0.755468	False
18	19	29	0.972935	False
18	20	46	1	False
18	21	35	1	False
18	22	40	0.809297	False
18	23	30	0.576682	False
18	24	23	0.370189	False
18	25	25	0.207452	False
18	26	24	0.0970572	False
18	27	13	0.03548	False
18	28	1	0.00913892	False
19	0	0	4.30125e-08	True
19	1	0	2.57949e-07	True
19	2	0	1.29666e-06	False
19	3	0	5.59256e-06	False
19	4	0	2.10972e-05	False
19	5	0	7.07261e-05	False
19	6	0	0.000213522	False
19	7	0	0.000587014	False
19	8	0	0.0014834	False
19	9	0	0.00347296	False
19	10	0	0.00758332	False
19	11	1	0.0155298	False
19	12	1	0.0299674	False
19	13	0	0.0547008	False
19	14	2	0.0947482	False
19	15	7	0.156126	False
19	16	14	0.245215	False
19	17	17	0.367618	False
19	18	25	0.526531	False
19	19	33	0.720879	False
19	20	45	0.943672	False
19	21	27	1	False
19	22	34	1	False
19	23	46	0.827718	False
19	24	65	0.577309	False
19	25	50	0.354219	False
19	26	34	0.182134	False
19	27	21	0.0727971	False
19	28	4	0.0199777	False
20	0	2	1.06837e-08	True
20	1	0	6.55942e-08	True
20	2	0	3.40246e-07	True
20	3	0	1.52341e-06	False
20	4	0	5.99346e-06	False
20	5	0	2.10301e-05	False
20	6	0	6.66419e-05	False
20	7	0	0.00019275	False
20	8	0	0.000513426	False
20	9	0	0.00126913	False
20	10	0	0.00293016	False
20	11	0	0.00635352	False
20	12	2	0.0129981	False
20	13	2	0.0251864	False
20	14	1	0.0463705	False
20	15	5	0.0813207	False
20	16	6	0.136105	False
20	17	10	0.217691	False
20	18	15	0.332983	False
20	19	18	0.487196	False
20	20	24	0.68161	False
20	21	44	0.911103	False
20	22	39	1	False
20	23	40	1	False
20	24	59	0.846502	False
20	25	66	0.571672	False
20	26	41	0.326401	False
20	27	37	0.144751	False
20	28	16	0.042885	False
21	0	0	2.44014e-09	True
21	1	0	1.53053e-08	True
21	2	0	8.17026e-08	True
21	3	0	3.78609e-07	True
21	4	0	1.5485e-06	False
21	5	0	5.66854e-06	False
21	6	0	1.8794e-05	False
21	7	0	5.7009e-05	False
21	8	0	0.000159585	False
21	9	0	0.00041531	False
21	10	0	0.0010112	False
21	11	0	0.00231604	False
21	12	0	0.005013	False
21	13	0	0.0102941	False
21	14	0	0.0201202	False
21	15	3	0.0375293	False
21	16	2	0.0669404	False
21	17	6	0.114344	False
21	18	15	0.187204	False
21	19	11	0.29381	False
21	20	17	0.441818	False
21	21	32	0.63574	False
21	22	54	0.873484	False
21	23	49	1	False
21	24	68	1	False
21	25	69	0.866051	False
21	26	84	0.555268	False
21	27	69	0.278604	False
21	28	35	0.0909739	False
22	0	1	5.08237e-10	True
22	1	0	3.2486e-09	True
22	2	0	1.77925e-08	True
22	3	0	8.50465e-08	True
22	4	0	3.60313e-07	True
22	5	0	1.37097e-06	False
22	6	0	4.73794e-06	False
22	7	0	1.50163e-05	False
22	8	0	4.40109e-05	False
22	9	0	0.000120147	False
22	10	0	0.000307416	False
22	11	0	0.000741211	False
22	12	0	0.00169194	False
22	13	0	0.00367109	False
22	14	0	0.00759719	False
22	15	0	0.0150383	False
22	16	0	0.0285385	False
22	17	4	0.0520141	False
22	18	8	0.0911556	False
22	19	11	0.153693	False
22	20	19	0.249258	False
22	21	18	0.388403	False
22	22	35	0.580197	False
22	23	44	0.827792	False
22	24	69	1	False
22	25	111	1	False
22	26	106	0.887006	False
22	27	142	0.516599	False
22	28	99	0.192547	False
23	0	0	9.56291e-11	True
23	1	0	6.21065e-10	True
23	2	0	3.47783e-09	True
23	3	0	1.70807e-08	True
23	4	0	7.46508e-08	True
23	5	0	2.93962e-07	True
23	6	0	1.05421e-06	False
23	7	0	3.47508e-06	False
23	8	0	1.06145e-05	False
23	9	0	3.02543e-05	False
23	10	0	8.09637e-05	False
23	11	0	0.000204528	False
23	12	0	0.000490031	False
23	13	0	0.00111816	False
23	14	0	0.00243875	False
23	15	0	0.00510009	False
23	16	1	0.0102542	False
23	17	2	0.0198662	False
23	18	0	0.0371523	False
23	19	3	0.0671537	False
23	20	8	0.117395	False
23	21	20	0.19846	False
23	22	21	0.324056	False
23	23	44	0.509658	False
23	24	69	0.768038	False
23	25	113	1	False
23	26	130	1	False
23	27	240	0.910558	False
23	28	284	0.413726	False
24	0	0	1.60825e-11	True
24	1	0	1.05748e-10	True
24	2	0	6.02951e-10	True
24	3	0	3.0289e-09	True
24	4	0	1.35892e-08	True
24	5	0	5.50954e-08	True
24	6	0	2.03925e-07	True
24	7	0	6.95215e-07	True
24	8	0	2.20009e-06	False
24	9	0	6.5074e-06	False
24	10	0	1.80987e-05	False
24	11	0	4.75871e-05	False
24	12	0	0.000118853	False
24	13	0	0.000283178	False
24	14	0	0.000646106	False
24	15	0	0.00141655	False
24	16	0	0.00299355	False
24	17	0	0.00611472	False
24	18	0	0.0121027	False
24	19	2	0.0232631	False
24	20	1	0.0435076	False
24	21	12	0.0792967	False
24	22	19	0.140999	False
24	23	28	0.244674	False
24	24	35	0.413908	False
24	25	104	0.679795	False
24	26	206	1	False
24	27	440	1	False
24	28	5597	0.939167	False
25	0	0	2.3882e-12	True
25	1	0	1.58299e-11	True
25	2	0	9.14514e-11	True
25	3	0	4.67347e-10	True
25	4	0	2.13984e-09	True
25	5	0	8.87634e-09	True
25	6	0	3.36825e-08	True
25	7	0	1.17919e-07	True
25	8	0	3.83721e-07	True
25	9	0	1.16838e-06	False
25	10	0	3.3485e-06	False
25	11	0	9.08038e-06	False
25	12	0	2.34103e-05	False
25	13	0	5.7627e-05	False
25	14	0	0.000135974	False
25	15	0	0.000308646	False
25	16	0	0.000676216	False
25	17	0	0.00143446	False
25	18	0	0.00295511	False
25	19	1	0.00592945	False
25	20	1	0.0116225	False
25	21	1	0.0223248	False
25	22	5	0.0421715	False
25	23	5	0.0786789	False
25	24	14	0.145827	False
25	25	39	0.27095	False
25	26	146	0.513187	False
25	27	468	1	False
25	28	26987	1	False
