# Supplementary material for: The rise and fall of the ancient northern pike master sex-determining gene
Source: eLife. 2021 Jan 28;10:e62858. doi: 10.7554/eLife.62858 (PMC7870143; doi:10.7554/eLife.62858)
Supplement: Figure 3—source data 2. [file elife-62858-fig3-data2.csv]

Males	Females	Markers	P	Signif
0	1	3001	1	False
0	2	240	0.46816	False
0	3	79	0.229906	False
0	4	34	0.113846	False
0	5	5	0.0558293	False
0	6	8	0.0268262	False
0	7	0	0.0125337	False
0	8	0	0.0056576	False
0	9	0	0.00245259	False
0	10	0	0.001015	False
0	11	0	0.000398506	False
0	12	0	0.000147429	False
0	13	0	5.10085e-05	False
0	14	0	1.63655e-05	False
0	15	0	4.82213e-06	False
0	16	0	1.29038e-06	False
0	17	0	3.0954e-07	True
0	18	0	6.5552e-08	True
0	19	0	1.20351e-08	True
0	20	0	1.87447e-09	True
1	0	3014	1	False
1	1	535	1	False
1	2	246	1	False
1	3	145	0.598161	False
1	4	79	0.33898	False
1	5	30	0.184039	False
1	6	10	0.0960124	False
1	7	4	0.0481068	False
1	8	0	0.0230957	False
1	9	0	0.0105871	False
1	10	0	0.0046134	False
1	11	0	0.00190089	False
1	12	0	0.00073602	False
1	13	0	0.000265873	False
1	14	0	8.88494e-05	False
1	15	0	2.71992e-05	False
1	16	0	7.53981e-06	False
1	17	0	1.86699e-06	False
1	18	0	4.06303e-07	True
1	19	0	7.62129e-08	True
1	20	0	1.20351e-08	True
2	0	296	0.46816	False
2	1	337	1	False
2	2	217	1	False
2	3	136	1	False
2	4	87	0.657905	False
2	5	58	0.405268	False
2	6	26	0.23568	False
2	7	19	0.129883	False
2	8	10	0.0678892	False
2	9	5	0.0336164	False
2	10	2	0.0157253	False
2	11	1	0.00692066	False
2	12	0	0.00284999	False
2	13	0	0.00109084	False
2	14	0	0.000384888	False
2	15	0	0.000123961	False
2	16	0	3.60135e-05	False
2	17	0	9.3046e-06	False
2	18	0	2.10144e-06	False
2	19	0	4.06303e-07	True
2	20	0	6.5552e-08	True
3	0	144	0.229906	False
3	1	167	0.598161	False
3	2	182	1	False
3	3	149	1	False
3	4	110	1	False
3	5	79	0.692633	False
3	6	49	0.448881	False
3	7	24	0.273322	False
3	8	9	0.15665	False
3	9	5	0.0844979	False
3	10	3	0.0428182	False
3	11	2	0.0203151	False
3	12	1	0.00898067	False
3	13	0	0.00367561	False
3	14	0	0.00138161	False
3	15	0	0.000472236	False
3	16	0	0.000144997	False
3	17	0	3.94016e-05	False
3	18	0	9.3046e-06	False
3	19	0	1.86699e-06	False
3	20	0	3.0954e-07	True
4	0	37	0.113846	False
4	1	94	0.33898	False
4	2	114	0.657905	False
4	3	119	1	False
4	4	113	1	False
4	5	68	1	False
4	6	65	0.715001	False
4	7	46	0.478812	False
4	8	22	0.300623	False
4	9	18	0.176914	False
4	10	9	0.0974217	False
4	11	8	0.0500435	False
4	12	1	0.0238684	False
4	13	0	0.0105043	False
4	14	1	0.00423123	False
4	15	0	0.00154424	False
4	16	0	0.000504218	False
4	17	0	0.000144997	False
4	18	0	3.60135e-05	False
4	19	0	7.53981e-06	False
4	20	0	1.29038e-06	False
5	0	22	0.0558293	False
5	1	48	0.184039	False
5	2	64	0.405268	False
5	3	74	0.692633	False
5	4	82	1	False
5	5	79	1	False
5	6	60	1	False
5	7	47	0.73007	False
5	8	34	0.499574	False
5	9	25	0.319984	False
5	10	15	0.191418	False
5	11	11	0.106583	False
5	12	8	0.0549743	False
5	13	4	0.0260983	False
5	14	1	0.0113094	False
5	15	0	0.00442653	False
5	16	0	0.00154424	False
5	17	0	0.000472236	False
5	18	0	0.000123961	False
5	19	0	2.71992e-05	False
5	20	0	4.82213e-06	False
6	0	10	0.0268262	False
6	1	19	0.0960124	False
6	2	45	0.23568	False
6	3	60	0.448881	False
6	4	69	0.715001	False
6	5	64	1	False
6	6	74	1	False
6	7	60	1	False
6	8	41	0.740269	False
6	9	28	0.513629	False
6	10	29	0.332922	False
6	11	12	0.200761	False
6	12	8	0.112037	False
6	13	6	0.0574669	False
6	14	4	0.0268567	False
6	15	1	0.0113094	False
6	16	0	0.00423123	False
6	17	0	0.00138161	False
6	18	1	0.000384888	False
6	19	0	8.88494e-05	False
6	20	0	1.63655e-05	False
7	0	1	0.0125337	False
7	1	10	0.0481068	False
7	2	21	0.129883	False
7	3	31	0.273322	False
7	4	43	0.478812	False
7	5	62	0.73007	False
7	6	51	1	False
7	7	57	1	False
7	8	44	1	False
7	9	39	0.746886	False
7	10	36	0.522372	False
7	11	25	0.340356	False
7	12	10	0.205336	False
7	13	5	0.113846	False
7	14	6	0.0574669	False
7	15	2	0.0260983	False
7	16	0	0.0105043	False
7	17	0	0.00367561	False
7	18	0	0.00109084	False
7	19	0	0.000265873	False
7	20	0	5.10085e-05	False
8	0	0	0.0056576	False
8	1	5	0.0230957	False
8	2	7	0.0678892	False
8	3	20	0.15665	False
8	4	30	0.300623	False
8	5	40	0.499574	False
8	6	36	0.740269	False
8	7	52	1	False
8	8	46	1	False
8	9	48	1	False
8	10	36	0.750621	False
8	11	26	0.526572	False
8	12	20	0.342782	False
8	13	9	0.205336	False
8	14	17	0.112037	False
8	15	4	0.0549743	False
8	16	2	0.0238684	False
8	17	0	0.00898067	False
8	18	0	0.00284999	False
8	19	0	0.00073602	False
8	20	0	0.000147429	False
9	0	0	0.00245259	False
9	1	5	0.0105871	False
9	2	6	0.0336164	False
9	3	9	0.0844979	False
9	4	13	0.176914	False
9	5	27	0.319984	False
9	6	38	0.513629	False
9	7	35	0.746886	False
9	8	39	1	False
9	9	36	1	False
9	10	42	1	False
9	11	37	0.75183	False
9	12	36	0.526572	False
9	13	17	0.340356	False
9	14	16	0.200761	False
9	15	15	0.106583	False
9	16	3	0.0500435	False
9	17	0	0.0203151	False
9	18	1	0.00692066	False
9	19	0	0.00190089	False
9	20	0	0.000398506	False
10	0	0	0.001015	False
10	1	0	0.0046134	False
10	2	4	0.0157253	False
10	3	7	0.0428182	False
10	4	10	0.0974217	False
10	5	13	0.191418	False
10	6	25	0.332922	False
10	7	30	0.522372	False
10	8	37	0.750621	False
10	9	41	1	False
10	10	41	1	False
10	11	56	1	False
10	12	39	0.750621	False
10	13	28	0.522372	False
10	14	25	0.332922	False
10	15	11	0.191418	False
10	16	4	0.0974217	False
10	17	1	0.0428182	False
10	18	0	0.0157253	False
10	19	0	0.0046134	False
10	20	0	0.001015	False
11	0	0	0.000398506	False
11	1	0	0.00190089	False
11	2	0	0.00692066	False
11	3	3	0.0203151	False
11	4	5	0.0500435	False
11	5	9	0.106583	False
11	6	18	0.200761	False
11	7	25	0.340356	False
11	8	25	0.526572	False
11	9	25	0.75183	False
11	10	43	1	False
11	11	39	1	False
11	12	38	1	False
11	13	46	0.746886	False
11	14	28	0.513629	False
11	15	22	0.319984	False
11	16	20	0.176914	False
11	17	8	0.0844979	False
11	18	0	0.0336164	False
11	19	0	0.0105871	False
11	20	0	0.00245259	False
12	0	0	0.000147429	False
12	1	0	0.00073602	False
12	2	0	0.00284999	False
12	3	1	0.00898067	False
12	4	1	0.0238684	False
12	5	8	0.0549743	False
12	6	14	0.112037	False
12	7	15	0.205336	False
12	8	29	0.342782	False
12	9	35	0.526572	False
12	10	38	0.750621	False
12	11	37	1	False
12	12	53	1	False
12	13	43	1	False
12	14	46	0.740269	False
12	15	24	0.499574	False
12	16	31	0.300623	False
12	17	18	0.15665	False
12	18	3	0.0678892	False
12	19	5	0.0230957	False
12	20	2	0.0056576	False
13	0	0	5.10085e-05	False
13	1	0	0.000265873	False
13	2	1	0.00109084	False
13	3	1	0.00367561	False
13	4	0	0.0105043	False
13	5	4	0.0260983	False
13	6	7	0.0574669	False
13	7	9	0.113846	False
13	8	15	0.205336	False
13	9	32	0.340356	False
13	10	23	0.522372	False
13	11	34	0.746886	False
13	12	36	1	False
13	13	68	1	False
13	14	38	1	False
13	15	34	0.73007	False
13	16	36	0.478812	False
13	17	38	0.273322	False
13	18	12	0.129883	False
13	19	25	0.0481068	False
13	20	4	0.0125337	False
14	0	0	1.63655e-05	False
14	1	0	8.88494e-05	False
14	2	0	0.000384888	False
14	3	0	0.00138161	False
14	4	1	0.00423123	False
14	5	3	0.0113094	False
14	6	2	0.0268567	False
14	7	7	0.0574669	False
14	8	15	0.112037	False
14	9	16	0.200761	False
14	10	32	0.332922	False
14	11	27	0.513629	False
14	12	56	0.740269	False
14	13	59	1	False
14	14	65	1	False
14	15	48	1	False
14	16	54	0.715001	False
14	17	37	0.448881	False
14	18	19	0.23568	False
14	19	16	0.0960124	False
14	20	5	0.0268262	False
15	0	0	4.82213e-06	False
15	1	0	2.71992e-05	False
15	2	0	0.000123961	False
15	3	0	0.000472236	False
15	4	0	0.00154424	False
15	5	1	0.00442653	False
15	6	4	0.0113094	False
15	7	3	0.0260983	False
15	8	10	0.0549743	False
15	9	11	0.106583	False
15	10	13	0.191418	False
15	11	29	0.319984	False
15	12	31	0.499574	False
15	13	38	0.73007	False
15	14	62	1	False
15	15	64	1	False
15	16	67	1	False
15	17	50	0.692633	False
15	18	41	0.405268	False
15	19	31	0.184039	False
15	20	4	0.0558293	False
16	0	0	1.29038e-06	False
16	1	0	7.53981e-06	False
16	2	0	3.60135e-05	False
16	3	0	0.000144997	False
16	4	0	0.000504218	False
16	5	1	0.00154424	False
16	6	1	0.00423123	False
16	7	5	0.0105043	False
16	8	9	0.0238684	False
16	9	6	0.0500435	False
16	10	11	0.0974217	False
16	11	22	0.176914	False
16	12	35	0.300623	False
16	13	42	0.478812	False
16	14	65	0.715001	False
16	15	75	1	False
16	16	72	1	False
16	17	77	1	False
16	18	58	0.657905	False
16	19	49	0.33898	False
16	20	38	0.113846	False
17	0	0	3.0954e-07	True
17	1	0	1.86699e-06	False
17	2	0	9.3046e-06	False
17	3	0	3.94016e-05	False
17	4	0	0.000144997	False
17	5	0	0.000472236	False
17	6	0	0.00138161	False
17	7	0	0.00367561	False
17	8	2	0.00898067	False
17	9	1	0.0203151	False
17	10	4	0.0428182	False
17	11	9	0.0844979	False
17	12	50	0.15665	False
17	13	24	0.273322	False
17	14	34	0.448881	False
17	15	43	0.692633	False
17	16	77	1	False
17	17	109	1	False
17	18	91	1	False
17	19	92	0.598161	False
17	20	52	0.229906	False
18	0	0	6.5552e-08	True
18	1	0	4.06303e-07	True
18	2	0	2.10144e-06	False
18	3	0	9.3046e-06	False
18	4	0	3.60135e-05	False
18	5	0	0.000123961	False
18	6	0	0.000384888	False
18	7	0	0.00109084	False
18	8	0	0.00284999	False
18	9	4	0.00692066	False
18	10	4	0.0157253	False
18	11	4	0.0336164	False
18	12	11	0.0678892	False
18	13	8	0.129883	False
18	14	23	0.23568	False
18	15	45	0.405268	False
18	16	78	0.657905	False
18	17	122	1	False
18	18	137	1	False
18	19	159	1	False
18	20	149	0.46816	False
19	0	0	1.20351e-08	True
19	1	0	7.62129e-08	True
19	2	0	4.06303e-07	True
19	3	0	1.86699e-06	False
19	4	0	7.53981e-06	False
19	5	0	2.71992e-05	False
19	6	0	8.88494e-05	False
19	7	0	0.000265873	False
19	8	0	0.00073602	False
19	9	0	0.00190089	False
19	10	0	0.0046134	False
19	11	2	0.0105871	False
19	12	2	0.0230957	False
19	13	6	0.0481068	False
19	14	14	0.0960124	False
19	15	27	0.184039	False
19	16	53	0.33898	False
19	17	126	0.598161	False
19	18	190	1	False
19	19	319	1	False
19	20	630	1	False
20	0	0	1.87447e-09	True
20	1	0	1.20351e-08	True
20	2	0	6.5552e-08	True
20	3	0	3.0954e-07	True
20	4	0	1.29038e-06	False
20	5	0	4.82213e-06	False
20	6	0	1.63655e-05	False
20	7	0	5.10085e-05	False
20	8	0	0.000147429	False
20	9	0	0.000398506	False
20	10	0	0.001015	False
20	11	1	0.00245259	False
20	12	0	0.0056576	False
20	13	2	0.0125337	False
20	14	2	0.0268262	False
20	15	7	0.0558293	False
20	16	23	0.113846	False
20	17	65	0.229906	False
20	18	167	0.46816	False
20	19	621	1	False
20	20	32985	1	False
