# Supplementary material for: The rise and fall of the ancient northern pike master sex-determining gene
Source: eLife. 2021 Jan 28;10:e62858. doi: 10.7554/eLife.62858 (PMC7870143; doi:10.7554/eLife.62858)
Supplement: Figure 3—source data 3. [file elife-62858-fig3-data3.csv]

M	F	Markers	P	CorrectedP	Signif	Bias
0	1	5006	0.959564	1	False	-0.0526316
0	2	473	0.424277	1	False	-0.105263
0	3	115	0.196266	1	False	-0.157895
0	4	31	0.0912846	1	False	-0.210526
0	5	9	0.0419079	1	False	-0.263158
0	6	6	0.0187826	1	False	-0.315789
0	7	1	0.00815211	1	False	-0.368421
0	8	0	0.00340306	1	False	-0.421053
0	9	0	0.00135756	1	False	-0.473684
0	10	0	0.000514189	1	False	-0.526316
0	11	0	0.000183648	1	False	-0.578947
0	12	0	6.13928e-05	1	False	-0.631579
0	13	0	1.9051e-05	1	False	-0.684211
0	14	0	5.43661e-06	0.301019	False	-0.736842
0	15	0	1.41158e-06	0.0781577	False	-0.789474
0	16	0	3.29373e-07	0.0182371	True	-0.842105
0	17	0	6.80811e-08	0.00376958	True	-0.894737
0	18	0	1.22566e-08	0.000678636	True	-0.947368
0	19	0	1.88365e-09	0.000104296	True	-1
1	0	5087	1	1	False	0.047619
1	1	843	1	1	False	-0.00501253
1	2	1737	0.928162	1	False	-0.0576441
1	3	189	0.526572	1	False	-0.110276
1	4	61	0.281457	1	False	-0.162907
1	5	23	0.143442	1	False	-0.215539
1	6	9	0.0699226	1	False	-0.26817
1	7	3	0.0325809	1	False	-0.320802
1	8	0	0.0144734	1	False	-0.373434
1	9	0	0.00610584	1	False	-0.426065
1	10	0	0.00243417	1	False	-0.478697
1	11	0	0.000911647	1	False	-0.531328
1	12	0	0.000318551	1	False	-0.58396
1	13	0	0.000103019	1	False	-0.636591
1	14	0	3.05473e-05	1	False	-0.689223
1	15	0	8.21477e-06	0.454844	False	-0.741855
1	16	0	1.9779e-06	0.109515	False	-0.794486
1	17	0	4.1996e-07	0.0232528	True	-0.847118
1	18	0	7.72252e-08	0.00427588	True	-0.899749
1	19	0	1.20351e-08	0.000666371	True	-0.952381
2	0	756	0.513275	1	False	0.0952381
2	1	404	1	1	False	0.0426065
2	2	319	1	1	False	-0.0100251
2	3	184	0.904743	1	False	-0.0626566
2	4	70	0.564365	1	False	-0.115288
2	5	22	0.327521	1	False	-0.16792
2	6	22	0.178415	1	False	-0.220551
2	7	10	0.0915911	1	False	-0.273183
2	8	3	0.0443433	1	False	-0.325815
2	9	3	0.0202164	1	False	-0.378446
2	10	1	0.00865134	1	False	-0.431078
2	11	0	0.00345873	1	False	-0.483709
2	12	0	0.00128394	1	False	-0.536341
2	13	0	0.000439204	1	False	-0.588972
2	14	0	0.000137177	1	False	-0.641604
2	15	0	3.86886e-05	1	False	-0.694236
2	16	0	9.72305e-06	0.538356	False	-0.746867
2	17	0	2.14295e-06	0.118653	False	-0.799499
2	18	0	4.06303e-07	0.0224966	True	-0.85213
2	19	0	6.47374e-08	0.00358445	True	-0.904762
3	0	308	0.266161	1	False	0.142857
3	1	314	0.672905	1	False	0.0902256
3	2	325	1	1	False	0.037594
3	3	253	1	1	False	-0.0150376
3	4	130	0.884059	1	False	-0.0676692
3	5	47	0.579516	1	False	-0.120301
3	6	27	0.352976	1	False	-0.172932
3	7	12	0.200679	1	False	-0.225564
3	8	6	0.1067	1	False	-0.278196
3	9	3	0.053039	1	False	-0.330827
3	10	3	0.0245942	1	False	-0.383459
3	11	0	0.0105968	1	False	-0.43609
3	12	0	0.00421885	1	False	-0.488722
3	13	0	0.00154075	1	False	-0.541353
3	14	0	0.000511462	1	False	-0.593985
3	15	0	0.000152597	1	False	-0.646617
3	16	0	4.03593e-05	1	False	-0.699248
3	17	0	9.3046e-06	0.515186	False	-0.75188
3	18	0	1.83172e-06	0.10142	False	-0.804511
3	19	0	3.00196e-07	0.0166215	True	-0.857143
4	0	74	0.139521	1	False	0.190476
4	1	119	0.402195	1	False	0.137845
4	2	213	0.756292	1	False	0.085213
4	3	223	1	1	False	0.0325815
4	4	200	1	1	False	-0.0200501
4	5	79	0.864537	1	False	-0.0726817
4	6	33	0.583411	1	False	-0.125313
4	7	16	0.36594	1	False	-0.177945
4	8	10	0.21362	1	False	-0.230576
4	9	2	0.116017	1	False	-0.283208
4	10	3	0.0585046	1	False	-0.33584
4	11	0	0.027293	1	False	-0.388471
4	12	0	0.0117158	1	False	-0.441103
4	13	0	0.00459425	1	False	-0.493734
4	14	0	0.00163066	1	False	-0.546366
4	15	0	0.000517805	1	False	-0.598998
4	16	0	0.000144997	1	False	-0.651629
4	17	0	3.517e-05	1	False	-0.704261
4	18	0	7.22716e-06	0.400161	False	-0.756892
4	19	0	1.22381e-06	0.0677612	False	-0.809524
5	0	21	0.0726397	1	False	0.238095
5	1	72	0.231276	1	False	0.185464
5	2	135	0.491789	1	False	0.132832
5	3	167	0.812294	1	False	0.0802005
5	4	317	1	1	False	0.0275689
5	5	157	1	1	False	-0.0250627
5	6	39	0.845391	1	False	-0.0776942
5	7	25	0.580439	1	False	-0.130326
5	8	17	0.370409	1	False	-0.182957
5	9	10	0.219419	1	False	-0.235589
5	10	7	0.120355	1	False	-0.288221
5	11	7	0.060891	1	False	-0.340852
5	12	1	0.0282575	1	False	-0.393484
5	13	0	0.0119394	1	False	-0.446115
5	14	0	0.00454923	1	False	-0.498747
5	15	0	0.00154424	1	False	-0.551378
5	16	0	0.000459921	1	False	-0.60401
5	17	0	0.000117902	1	False	-0.656642
5	18	0	2.53963e-05	1	False	-0.709273
5	19	0	4.45866e-06	0.246871	False	-0.761905
6	0	10	0.0371782	1	False	0.285714
6	1	36	0.12832	1	False	0.233083
6	2	51	0.303467	1	False	0.180451
6	3	135	0.556781	1	False	0.12782
6	4	222	0.854953	1	False	0.075188
6	5	135	1	1	False	0.0225564
6	6	58	1	1	False	-0.0300752
6	7	32	0.826104	1	False	-0.0827067
6	8	24	0.572584	1	False	-0.135338
6	9	13	0.368508	1	False	-0.18797
6	10	18	0.219454	1	False	-0.240602
6	11	7	0.120376	1	False	-0.293233
6	12	1	0.0604508	1	False	-0.345865
6	13	1	0.0275742	1	False	-0.398496
6	14	0	0.0113094	1	False	-0.451128
6	15	0	0.00411728	1	False	-0.503759
6	16	0	0.00130895	1	False	-0.556391
6	17	0	0.000355954	1	False	-0.609022
6	18	0	8.06487e-05	1	False	-0.661654
6	19	0	1.47191e-05	0.814979	False	-0.714286
7	0	9	0.01857	1	False	0.333333
7	1	11	0.0686697	1	False	0.280702
7	2	46	0.178348	1	False	0.22807
7	3	92	0.360709	1	False	0.175439
7	4	227	0.607183	1	False	0.122807
7	5	163	0.890093	1	False	0.0701754
7	6	34	1	1	False	0.0175439
7	7	26	1	1	False	-0.0350877
7	8	19	0.806258	1	False	-0.0877193
7	9	10	0.560786	1	False	-0.140351
7	10	23	0.361398	1	False	-0.192982
7	11	6	0.214586	1	False	-0.245614
7	12	7	0.11659	1	False	-0.298246
7	13	3	0.0574669	1	False	-0.350877
7	14	0	0.0254178	1	False	-0.403509
7	15	0	0.00994969	1	False	-0.45614
7	16	0	0.00338678	1	False	-0.508772
7	17	0	0.000980167	1	False	-0.561404
7	18	0	0.000234301	1	False	-0.614035
7	19	0	4.45506e-05	1	False	-0.666667
8	0	3	0.00899757	1	False	0.380952
8	1	4	0.0353705	1	False	0.328321
8	2	10	0.0999233	1	False	0.275689
8	3	59	0.221254	1	False	0.223058
8	4	653	0.407039	1	False	0.170426
8	5	1530	0.648172	1	False	0.117794
8	6	78	0.920683	1	False	0.0651629
8	7	79	1	1	False	0.0125313
8	8	22	1	1	False	-0.0401002
8	9	22	0.785461	1	False	-0.0927318
8	10	16	0.545434	1	False	-0.145363
8	11	10	0.34968	1	False	-0.197995
8	12	11	0.205336	1	False	-0.250627
8	13	3	0.109387	1	False	-0.303258
8	14	1	0.0522419	1	False	-0.35589
8	15	0	0.0220349	1	False	-0.408521
8	16	0	0.00805268	1	False	-0.461153
8	17	0	0.00248781	1	False	-0.513784
8	18	0	0.000629227	1	False	-0.566416
8	19	0	0.000124887	1	False	-0.619048
9	0	1	0.0042055	1	False	0.428571
9	1	2	0.0174808	1	False	0.37594
9	2	2	0.0533224	1	False	0.323308
9	3	4	0.1285	1	False	0.270677
9	4	8	0.257505	1	False	0.218045
9	5	50	0.445226	1	False	0.165414
9	6	206	0.682716	1	False	0.112782
9	7	721	0.948468	1	False	0.0601504
9	8	22	1	1	False	0.0075188
9	9	25	1	1	False	-0.0451128
9	10	12	0.763285	1	False	-0.0977444
9	11	17	0.526572	1	False	-0.150376
9	12	12	0.333588	1	False	-0.203007
9	13	5	0.191996	1	False	-0.255639
9	14	5	0.0990918	1	False	-0.308271
9	15	1	0.0451186	1	False	-0.360902
9	16	0	0.0177494	1	False	-0.413534
9	17	0	0.00587156	1	False	-0.466165
9	18	0	0.00157594	1	False	-0.518797
9	19	0	0.0003271	1	False	-0.571429
10	0	0	0.00188582	1	False	0.47619
10	1	0	0.00825637	1	False	0.423559
10	2	1	0.0270376	1	False	0.370927
10	3	3	0.0705577	1	False	0.318296
10	4	1	0.153516	1	False	0.265664
10	5	10	0.287884	1	False	0.213033
10	6	14	0.477124	1	False	0.160401
10	7	14	0.712661	1	False	0.107769
10	8	18	0.974614	1	False	0.0551378
10	9	23	1	1	False	0.00250626
10	10	14	1	1	False	-0.0501253
10	11	21	0.739231	1	False	-0.102757
10	12	28	0.503968	1	False	-0.155388
10	13	13	0.313081	1	False	-0.20802
10	14	11	0.174704	1	False	-0.260652
10	15	6	0.0860175	1	False	-0.313283
10	16	0	0.036524	1	False	-0.365915
10	17	1	0.01298	1	False	-0.418546
10	18	0	0.00370901	1	False	-0.471178
10	19	0	0.000806649	1	False	-0.52381
11	0	0	0.000806649	1	False	0.52381
11	1	0	0.00370901	1	False	0.471178
11	2	0	0.01298	1	False	0.418546
11	3	0	0.036524	1	False	0.365915
11	4	2	0.0860175	1	False	0.313283
11	5	3	0.174704	1	False	0.260652
11	6	5	0.313081	1	False	0.20802
11	7	11	0.503968	1	False	0.155389
11	8	20	0.739231	1	False	0.102757
11	9	19	1	1	False	0.0501253
11	10	19	1	1	False	-0.00250626
11	11	25	0.974614	1	False	-0.0551378
11	12	36	0.712661	1	False	-0.107769
11	13	31	0.477124	1	False	-0.160401
11	14	14	0.287884	1	False	-0.213033
11	15	6	0.153516	1	False	-0.265664
11	16	2	0.0705577	1	False	-0.318296
11	17	1	0.0270376	1	False	-0.370927
11	18	1	0.00825637	1	False	-0.423559
11	19	0	0.00188582	1	False	-0.47619
12	0	0	0.0003271	1	False	0.571429
12	1	0	0.00157594	1	False	0.518797
12	2	0	0.00587156	1	False	0.466165
12	3	0	0.0177494	1	False	0.413534
12	4	1	0.0451186	1	False	0.360902
12	5	1	0.0990918	1	False	0.308271
12	6	3	0.191996	1	False	0.255639
12	7	3	0.333588	1	False	0.203008
12	8	11	0.526572	1	False	0.150376
12	9	9	0.763285	1	False	0.0977444
12	10	11	1	1	False	0.0451128
12	11	23	1	1	False	-0.00751877
12	12	33	0.948468	1	False	-0.0601503
12	13	1159	0.682716	1	False	-0.112782
12	14	59	0.445226	1	False	-0.165413
12	15	38	0.257505	1	False	-0.218045
12	16	3	0.1285	1	False	-0.270677
12	17	0	0.0533224	1	False	-0.323308
12	18	0	0.0174808	1	False	-0.37594
12	19	0	0.0042055	1	False	-0.428571
13	0	0	0.000124887	1	False	0.619048
13	1	1	0.000629227	1	False	0.566416
13	2	0	0.00248781	1	False	0.513784
13	3	0	0.00805268	1	False	0.461153
13	4	1	0.0220349	1	False	0.408521
13	5	4	0.0522419	1	False	0.35589
13	6	2	0.109387	1	False	0.303258
13	7	3	0.205336	1	False	0.250627
13	8	3	0.34968	1	False	0.197995
13	9	9	0.545434	1	False	0.145363
13	10	14	0.785461	1	False	0.0927318
13	11	13	1	1	False	0.0401003
13	12	13	1	1	False	-0.0125313
13	13	68	0.920683	1	False	-0.0651629
13	14	74	0.648172	1	False	-0.117794
13	15	1876	0.407039	1	False	-0.170426
13	16	20	0.221254	1	False	-0.223058
13	17	8	0.0999233	1	False	-0.275689
13	18	1	0.0353705	1	False	-0.328321
13	19	0	0.00899757	1	False	-0.380952
14	0	0	4.45506e-05	1	False	0.666667
14	1	0	0.000234301	1	False	0.614035
14	2	0	0.000980167	1	False	0.561404
14	3	0	0.00338678	1	False	0.508772
14	4	0	0.00994969	1	False	0.45614
14	5	0	0.0254178	1	False	0.403509
14	6	2	0.0574669	1	False	0.350877
14	7	1	0.11659	1	False	0.298246
14	8	3	0.214586	1	False	0.245614
14	9	9	0.361398	1	False	0.192982
14	10	8	0.560786	1	False	0.140351
14	11	5	0.806258	1	False	0.0877193
14	12	13	1	1	False	0.0350878
14	13	32	1	1	False	-0.0175439
14	14	13	0.890093	1	False	-0.0701754
14	15	129	0.607183	1	False	-0.122807
14	16	36	0.360709	1	False	-0.175439
14	17	20	0.178348	1	False	-0.22807
14	18	5	0.0686697	1	False	-0.280702
14	19	3	0.01857	1	False	-0.333333
15	0	0	1.47191e-05	0.814979	False	0.714286
15	1	0	8.06487e-05	1	False	0.661654
15	2	0	0.000355954	1	False	0.609023
15	3	0	0.00130895	1	False	0.556391
15	4	0	0.00411728	1	False	0.503759
15	5	0	0.0113094	1	False	0.451128
15	6	1	0.0275742	1	False	0.398496
15	7	0	0.0604508	1	False	0.345865
15	8	3	0.120376	1	False	0.293233
15	9	1	0.219454	1	False	0.240602
15	10	10	0.368508	1	False	0.18797
15	11	7	0.572584	1	False	0.135338
15	12	8	0.826104	1	False	0.0827068
15	13	22	1	1	False	0.0300752
15	14	27	1	1	False	-0.0225564
15	15	80	0.854953	1	False	-0.075188
15	16	43	0.556781	1	False	-0.12782
15	17	22	0.303467	1	False	-0.180451
15	18	16	0.12832	1	False	-0.233083
15	19	5	0.0371782	1	False	-0.285714
16	0	0	4.45866e-06	0.246871	False	0.761905
16	1	0	2.53963e-05	1	False	0.709273
16	2	0	0.000117902	1	False	0.656642
16	3	0	0.000459921	1	False	0.60401
16	4	0	0.00154424	1	False	0.551378
16	5	0	0.00454923	1	False	0.498747
16	6	0	0.0119394	1	False	0.446115
16	7	0	0.0282575	1	False	0.393484
16	8	0	0.060891	1	False	0.340852
16	9	3	0.120355	1	False	0.288221
16	10	3	0.219419	1	False	0.235589
16	11	5	0.370409	1	False	0.182957
16	12	9	0.580439	1	False	0.130326
16	13	17	0.845391	1	False	0.0776942
16	14	11	1	1	False	0.0250627
16	15	138	1	1	False	-0.0275689
16	16	70	0.812294	1	False	-0.0802005
16	17	43	0.491789	1	False	-0.132832
16	18	28	0.231276	1	False	-0.185464
16	19	23	0.0726397	1	False	-0.238095
17	0	0	1.22381e-06	0.0677612	False	0.809524
17	1	0	7.22716e-06	0.400161	False	0.756892
17	2	0	3.517e-05	1	False	0.704261
17	3	0	0.000144997	1	False	0.651629
17	4	0	0.000517805	1	False	0.598997
17	5	0	0.00163066	1	False	0.546366
17	6	0	0.00459425	1	False	0.493734
17	7	0	0.0117158	1	False	0.441103
17	8	0	0.027293	1	False	0.388471
17	9	0	0.0585046	1	False	0.33584
17	10	2	0.116017	1	False	0.283208
17	11	3	0.21362	1	False	0.230576
17	12	7	0.36594	1	False	0.177945
17	13	8	0.583411	1	False	0.125313
17	14	12	0.864537	1	False	0.0726817
17	15	58	1	1	False	0.0200501
17	16	42	1	1	False	-0.0325814
17	17	82	0.756292	1	False	-0.085213
17	18	50	0.402195	1	False	-0.137845
17	19	46	0.139521	1	False	-0.190476
18	0	0	3.00196e-07	0.0166215	True	0.857143
18	1	0	1.83172e-06	0.10142	False	0.804511
18	2	0	9.3046e-06	0.515186	False	0.75188
18	3	0	4.03593e-05	1	False	0.699248
18	4	0	0.000152597	1	False	0.646617
18	5	1	0.000511462	1	False	0.593985
18	6	0	0.00154075	1	False	0.541353
18	7	0	0.00421885	1	False	0.488722
18	8	0	0.0105968	1	False	0.43609
18	9	0	0.0245942	1	False	0.383459
18	10	0	0.053039	1	False	0.330827
18	11	3	0.1067	1	False	0.278196
18	12	1	0.200679	1	False	0.225564
18	13	10	0.352976	1	False	0.172932
18	14	7	0.579516	1	False	0.120301
18	15	29	0.884059	1	False	0.0676692
18	16	52	1	1	False	0.0150376
18	17	90	1	1	False	-0.037594
18	18	92	0.672905	1	False	-0.0902256
18	19	201	0.266161	1	False	-0.142857
19	0	0	6.47374e-08	0.00358445	True	0.904762
19	1	3	4.06303e-07	0.0224966	True	0.85213
19	2	0	2.14295e-06	0.118653	False	0.799499
19	3	0	9.72305e-06	0.538356	False	0.746867
19	4	0	3.86886e-05	1	False	0.694236
19	5	0	0.000137177	1	False	0.641604
19	6	0	0.000439204	1	False	0.588972
19	7	0	0.00128394	1	False	0.536341
19	8	0	0.00345873	1	False	0.483709
19	9	0	0.00865134	1	False	0.431078
19	10	0	0.0202164	1	False	0.378446
19	11	0	0.0443433	1	False	0.325815
19	12	4	0.0915911	1	False	0.273183
19	13	5	0.178415	1	False	0.220551
19	14	7	0.327521	1	False	0.16792
19	15	22	0.564365	1	False	0.115288
19	16	57	0.904743	1	False	0.0626566
19	17	141	1	1	False	0.0100251
19	18	95	1	1	False	-0.0426065
19	19	250	0.513275	1	False	-0.0952381
20	0	0	1.20351e-08	0.000666371	True	0.952381
20	1	0	7.72252e-08	0.00427588	True	0.899749
20	2	0	4.1996e-07	0.0232528	True	0.847118
20	3	0	1.9779e-06	0.109515	False	0.794486
20	4	0	8.21477e-06	0.454844	False	0.741855
20	5	0	3.05473e-05	1	False	0.689223
20	6	0	0.000103019	1	False	0.636591
20	7	0	0.000318551	1	False	0.58396
20	8	0	0.000911647	1	False	0.531328
20	9	0	0.00243417	1	False	0.478697
20	10	0	0.00610584	1	False	0.426065
20	11	0	0.0144734	1	False	0.373434
20	12	2	0.0325809	1	False	0.320802
20	13	2	0.0699226	1	False	0.26817
20	14	3	0.143442	1	False	0.215539
20	15	13	0.281457	1	False	0.162907
20	16	48	0.526572	1	False	0.110276
20	17	928	0.928162	1	False	0.0576441
20	18	168	1	1	False	0.00501251
20	19	666	1	1	False	-0.047619
21	0	0	1.88365e-09	0.000104296	True	1
21	1	0	1.22566e-08	0.000678636	True	0.947368
21	2	0	6.80811e-08	0.00376958	True	0.894737
21	3	0	3.29373e-07	0.0182371	True	0.842105
21	4	0	1.41158e-06	0.0781577	False	0.789474
21	5	0	5.43661e-06	0.301019	False	0.736842
21	6	0	1.9051e-05	1	False	0.684211
21	7	0	6.13928e-05	1	False	0.631579
21	8	0	0.000183648	1	False	0.578947
21	9	0	0.000514189	1	False	0.526316
21	10	0	0.00135756	1	False	0.473684
21	11	0	0.00340306	1	False	0.421053
21	12	0	0.00815211	1	False	0.368421
21	13	0	0.0187826	1	False	0.315789
21	14	0	0.0419079	1	False	0.263158
21	15	3	0.0912846	1	False	0.210526
21	16	5	0.196266	1	False	0.157895
21	17	85	0.424277	1	False	0.105263
21	18	264	0.959564	1	False	0.0526316
21	19	21073	1	1	False	0
