# Supplementary material for: The rise and fall of the ancient northern pike master sex-determining gene
Source: eLife. 2021 Jan 28;10:e62858. doi: 10.7554/eLife.62858 (PMC7870143; doi:10.7554/eLife.62858)
Supplement: Figure 3—source data 4. [file elife-62858-fig3-data4.csv]

M	F	Markers	P	CorrectedP	Signif	Bias
0	1	1126	1	1	False	-0.0322581
0	2	192	0.472267	1	False	-0.0645161
0	3	69	0.236534	1	False	-0.0967742
0	4	33	0.120935	1	False	-0.129032
0	5	26	0.0620884	1	False	-0.16129
0	6	12	0.0317287	1	False	-0.193548
0	7	10	0.0160499	1	False	-0.225806
0	8	0	0.00800477	1	False	-0.258065
0	9	0	0.00392399	1	False	-0.290323
0	10	0	0.0018856	1	False	-0.322581
0	11	0	0.000886062	1	False	-0.354839
0	12	1	0.000406227	1	False	-0.387097
0	13	0	0.000181291	1	False	-0.419355
0	14	0	7.85755e-05	1	False	-0.451613
0	15	0	3.29968e-05	1	False	-0.483871
0	16	0	1.33922e-05	0.726366	False	-0.516129
0	17	0	5.23941e-06	0.284175	False	-0.548387
0	18	0	1.97035e-06	0.106868	False	-0.580645
0	19	0	7.10103e-07	0.0385146	True	-0.612903
0	20	0	2.44453e-07	0.0132586	True	-0.645161
0	21	0	8.00973e-08	0.00434432	True	-0.677419
0	22	0	2.4883e-08	0.00134961	True	-0.709677
0	23	0	7.29795e-09	0.000395826	True	-0.741935
0	24	0	2.01129e-09	0.000109088	True	-0.774194
0	25	0	5.18176e-10	2.81048e-05	True	-0.806452
0	26	0	1.24085e-10	6.7301e-06	True	-0.83871
0	27	0	2.74426e-11	1.48843e-06	True	-0.870968
0	28	0	5.56566e-12	3.0187e-07	True	-0.903226
0	29	0	1.02685e-12	5.5694e-08	True	-0.935484
0	30	0	1.70863e-13	9.26728e-09	True	-0.967742
0	31	0	2.53131e-14	1.37293e-09	True	-1
1	0	1390	1	1	False	0.0322581
1	1	162	1	1	False	0
1	2	108	1	1	False	-0.0322581
1	3	72	0.605188	1	False	-0.0645161
1	4	35	0.350907	1	False	-0.0967742
1	5	32	0.197507	1	False	-0.129032
1	6	10	0.108453	1	False	-0.16129
1	7	7	0.0581995	1	False	-0.193548
1	8	9	0.0305292	1	False	-0.225806
1	9	5	0.0156453	1	False	-0.258065
1	10	1	0.00782505	1	False	-0.290323
1	11	0	0.00381466	1	False	-0.322581
1	12	0	0.00180977	1	False	-0.354839
1	13	0	0.000834138	1	False	-0.387097
1	14	0	0.000372798	1	False	-0.419355
1	15	0	0.000161221	1	False	-0.451613
1	16	0	6.73112e-05	1	False	-0.483871
1	17	0	2.70641e-05	1	False	-0.516129
1	18	0	1.04509e-05	0.566839	False	-0.548387
1	19	0	3.86441e-06	0.209598	False	-0.580645
1	20	0	1.36383e-06	0.0739716	False	-0.612903
1	21	0	4.57757e-07	0.0248278	True	-0.645161
1	22	0	1.45544e-07	0.00789401	True	-0.677419
1	23	0	4.36466e-08	0.00236731	True	-0.709677
1	24	0	1.22862e-08	0.000666376	True	-0.741935
1	25	0	3.22902e-09	0.000175136	True	-0.774194
1	26	0	7.87654e-10	4.27208e-05	True	-0.806452
1	27	0	1.77144e-10	9.60794e-06	True	-0.83871
1	28	0	3.64599e-11	1.97751e-06	True	-0.870968
1	29	0	6.81044e-12	3.69385e-07	True	-0.903226
1	30	0	1.14364e-12	6.20288e-08	True	-0.935484
1	31	0	1.70863e-13	9.26728e-09	True	-0.967742
2	0	127	0.472267	1	False	0.0645161
2	1	138	1	1	False	0.0322581
2	2	69	1	1	False	0
2	3	58	1	1	False	-0.0322581
2	4	48	0.667514	1	False	-0.0645161
2	5	37	0.42221	1	False	-0.0967742
2	6	24	0.255741	1	False	-0.129032
2	7	16	0.149273	1	False	-0.16129
2	8	8	0.0842592	1	False	-0.193548
2	9	5	0.0460816	1	False	-0.225806
2	10	2	0.0244372	1	False	-0.258065
2	11	1	0.0125661	1	False	-0.290323
2	12	1	0.00626236	1	False	-0.322581
2	13	2	0.00302169	1	False	-0.354839
2	14	0	0.0014098	1	False	-0.387097
2	15	1	0.000634959	1	False	-0.419355
2	16	0	0.000275534	1	False	-0.451613
2	17	0	0.000114941	1	False	-0.483871
2	18	0	4.59775e-05	1	False	-0.516129
2	19	0	1.75856e-05	0.95381	False	-0.548387
2	20	0	6.41112e-06	0.347726	False	-0.580645
2	21	0	2.21992e-06	0.120404	False	-0.612903
2	22	0	7.27202e-07	0.039442	True	-0.645161
2	23	0	2.24379e-07	0.0121698	True	-0.677419
2	24	0	6.48916e-08	0.00351959	True	-0.709677
2	25	0	1.74944e-08	0.00094886	True	-0.741935
2	26	0	4.36965e-09	0.000237001	True	-0.774194
2	27	0	1.00425e-09	5.44687e-05	True	-0.806452
2	28	0	2.10727e-10	1.14294e-05	True	-0.83871
2	29	0	4.00192e-11	2.17056e-06	True	-0.870968
2	30	0	6.81044e-12	3.69385e-07	True	-0.903226
2	31	0	1.02685e-12	5.5694e-08	True	-0.935484
3	0	24	0.236534	1	False	0.0967742
3	1	49	0.605188	1	False	0.0645161
3	2	45	1	1	False	0.0322581
3	3	49	1	1	False	0
3	4	42	1	1	False	-0.0322581
3	5	43	0.704808	1	False	-0.0645161
3	6	36	0.470877	1	False	-0.0967742
3	7	18	0.300251	1	False	-0.129032
3	8	9	0.183596	1	False	-0.16129
3	9	14	0.107994	1	False	-0.193548
3	10	3	0.0612236	1	False	-0.225806
3	11	4	0.0334845	1	False	-0.258065
3	12	1	0.0176721	1	False	-0.290323
3	13	1	0.00899727	1	False	-0.322581
3	14	0	0.00441537	1	False	-0.354839
3	15	1	0.00208607	1	False	-0.387097
3	16	0	0.000947327	1	False	-0.419355
3	17	0	0.000412698	1	False	-0.451613
3	18	0	0.000172075	1	False	-0.483871
3	19	0	6.84842e-05	1	False	-0.516129
3	20	0	2.5937e-05	1	False	-0.548387
3	21	0	9.31529e-06	0.505243	False	-0.580645
3	22	0	3.16019e-06	0.171402	False	-0.612903
3	23	0	1.00821e-06	0.0546831	False	-0.645161
3	24	0	3.00984e-07	0.0163248	True	-0.677419
3	25	0	8.36101e-08	0.00453485	True	-0.709677
3	26	0	2.14758e-08	0.00116481	True	-0.741935
3	27	0	5.06423e-09	0.000274674	True	-0.774194
3	28	0	1.08751e-09	5.89845e-05	True	-0.806452
3	29	0	2.10727e-10	1.14294e-05	True	-0.83871
3	30	0	3.64599e-11	1.97751e-06	True	-0.870968
3	31	0	5.56566e-12	3.0187e-07	True	-0.903226
4	0	17	0.120935	1	False	0.129032
4	1	30	0.350907	1	False	0.0967742
4	2	35	0.667514	1	False	0.0645161
4	3	38	1	1	False	0.0322581
4	4	38	1	1	False	0
4	5	23	1	1	False	-0.0322581
4	6	24	0.72987	1	False	-0.0645161
4	7	10	0.506126	1	False	-0.0967742
4	8	19	0.334863	1	False	-0.129032
4	9	15	0.212061	1	False	-0.16129
4	10	17	0.12883	1	False	-0.193548
4	11	22	0.0751883	1	False	-0.225806
4	12	8	0.0421862	1	False	-0.258065
4	13	1	0.0227574	1	False	-0.290323
4	14	1	0.0117984	1	False	-0.322581
4	15	1	0.0058734	1	False	-0.354839
4	16	1	0.00280378	1	False	-0.387097
4	17	0	0.00128125	1	False	-0.419355
4	18	0	0.000559289	1	False	-0.451613
4	19	0	0.000232616	1	False	-0.483871
4	20	0	9.19084e-05	1	False	-0.516129
4	21	0	3.43791e-05	1	False	-0.548387
4	22	0	1.21271e-05	0.65775	False	-0.580645
4	23	0	4.01611e-06	0.217826	False	-0.612903
4	24	0	1.24234e-06	0.0673818	False	-0.645161
4	25	0	3.56912e-07	0.0193582	True	-0.677419
4	26	0	9.46103e-08	0.00513147	True	-0.709677
4	27	0	2.29692e-08	0.0012458	True	-0.741935
4	28	0	5.06423e-09	0.000274674	True	-0.774194
4	29	0	1.00425e-09	5.44687e-05	True	-0.806452
4	30	0	1.77144e-10	9.60794e-06	True	-0.83871
4	31	0	2.74426e-11	1.48843e-06	True	-0.870968
5	0	12	0.0620884	1	False	0.16129
5	1	19	0.197507	1	False	0.129032
5	2	24	0.42221	1	False	0.0967742
5	3	29	0.704808	1	False	0.0645161
5	4	19	1	1	False	0.0322581
5	5	29	1	1	False	0
5	6	28	1	1	False	-0.0322581
5	7	23	0.747866	1	False	-0.0645161
5	8	16	0.532654	1	False	-0.0967742
5	9	15	0.362169	1	False	-0.129032
5	10	25	0.23554	1	False	-0.16129
5	11	18	0.146724	1	False	-0.193548
5	12	5	0.0876155	1	False	-0.225806
5	13	5	0.0501673	1	False	-0.258065
5	14	3	0.0275375	1	False	-0.290323
5	15	1	0.0144807	1	False	-0.322581
5	16	0	0.00728658	1	False	-0.354839
5	17	0	0.00350301	1	False	-0.387097
5	18	0	0.00160572	1	False	-0.419355
5	19	0	0.00070008	1	False	-0.451613
5	20	0	0.000289475	1	False	-0.483871
5	21	0	0.000113132	1	False	-0.516129
5	22	0	4.1626e-05	1	False	-0.548387
5	23	0	1.43545e-05	0.778561	False	-0.580645
5	24	0	4.61543e-06	0.250332	False	-0.612903
5	25	0	1.37553e-06	0.074606	False	-0.645161
5	26	0	3.77425e-07	0.0204708	True	-0.677419
5	27	0	9.46103e-08	0.00513147	True	-0.709677
5	28	0	2.14758e-08	0.00116481	True	-0.741935
5	29	0	4.36965e-09	0.000237001	True	-0.774194
5	30	0	7.87654e-10	4.27208e-05	True	-0.806452
5	31	0	1.24085e-10	6.7301e-06	True	-0.83871
6	0	8	0.0317287	1	False	0.193548
6	1	14	0.108453	1	False	0.16129
6	2	20	0.255741	1	False	0.129032
6	3	17	0.470877	1	False	0.0967742
6	4	31	0.72987	1	False	0.0645161
6	5	30	1	1	False	0.0322581
6	6	37	1	1	False	0
6	7	22	1	1	False	-0.0322581
6	8	18	0.761321	1	False	-0.0645161
6	9	23	0.553111	1	False	-0.0967742
6	10	32	0.383907	1	False	-0.129032
6	11	12	0.254811	1	False	-0.16129
6	12	3	0.161827	1	False	-0.193548
6	13	6	0.0983594	1	False	-0.225806
6	14	2	0.0572034	1	False	-0.258065
6	15	3	0.0318121	1	False	-0.290323
6	16	1	0.0168991	1	False	-0.322581
6	17	0	0.00856226	1	False	-0.354839
6	18	0	0.00412972	1	False	-0.387097
6	19	1	0.00189157	1	False	-0.419355
6	20	0	0.000820426	1	False	-0.451613
6	21	0	0.000335813	1	False	-0.483871
6	22	0	0.000129204	1	False	-0.516129
6	23	0	4.65135e-05	1	False	-0.548387
6	24	0	1.55851e-05	0.845303	False	-0.580645
6	25	0	4.8308e-06	0.262013	False	-0.612903
6	26	0	1.37553e-06	0.074606	False	-0.645161
6	27	0	3.56912e-07	0.0193582	True	-0.677419
6	28	0	8.36101e-08	0.00453485	True	-0.709677
6	29	0	1.74944e-08	0.00094886	True	-0.741935
6	30	0	3.22902e-09	0.000175136	True	-0.774194
6	31	0	5.18176e-10	2.81048e-05	True	-0.806452
7	0	2	0.0160499	1	False	0.225806
7	1	9	0.0581995	1	False	0.193548
7	2	21	0.149273	1	False	0.16129
7	3	17	0.300251	1	False	0.129032
7	4	9	0.506126	1	False	0.0967742
7	5	20	0.747866	1	False	0.0645161
7	6	22	1	1	False	0.0322581
7	7	25	1	1	False	0
7	8	35	1	1	False	-0.0322581
7	9	24	0.771633	1	False	-0.0645161
7	10	23	0.569105	1	False	-0.0967742
7	11	18	0.401261	1	False	-0.129032
7	12	9	0.270502	1	False	-0.16129
7	13	12	0.174338	1	False	-0.193548
7	14	4	0.107382	1	False	-0.225806
7	15	3	0.0631649	1	False	-0.258065
7	16	4	0.0354445	1	False	-0.290323
7	17	1	0.0189451	1	False	-0.322581
7	18	0	0.00962669	1	False	-0.354839
7	19	0	0.00463926	1	False	-0.387097
7	20	0	0.00211423	1	False	-0.419355
7	21	0	0.000908026	1	False	-0.451613
7	22	0	0.000366044	1	False	-0.483871
7	23	0	0.000137854	1	False	-0.516129
7	24	0	4.8238e-05	1	False	-0.548387
7	25	0	1.55851e-05	0.845303	False	-0.580645
7	26	0	4.61543e-06	0.250332	False	-0.612903
7	27	0	1.24234e-06	0.0673818	False	-0.645161
7	28	0	3.00984e-07	0.0163248	True	-0.677419
7	29	0	6.48916e-08	0.00351959	True	-0.709677
7	30	0	1.22862e-08	0.000666376	True	-0.741935
7	31	0	2.01129e-09	0.000109088	True	-0.774194
8	0	1	0.00800477	1	False	0.258065
8	1	2	0.0305292	1	False	0.225806
8	2	7	0.0842592	1	False	0.193548
8	3	11	0.183596	1	False	0.16129
8	4	18	0.334863	1	False	0.129032
8	5	18	0.532654	1	False	0.0967742
8	6	37	0.761321	1	False	0.0645161
8	7	29	1	1	False	0.0322581
8	8	17	1	1	False	0
8	9	22	1	1	False	-0.0322581
8	10	23	0.779638	1	False	-0.0645161
8	11	23	0.581666	1	False	-0.0967742
8	12	17	0.415051	1	False	-0.129032
8	13	13	0.2831	1	False	-0.16129
8	14	11	0.184455	1	False	-0.193548
8	15	16	0.114696	1	False	-0.225806
8	16	14	0.0679797	1	False	-0.258065
8	17	2	0.0383433	1	False	-0.290323
8	18	0	0.0205403	1	False	-0.322581
8	19	0	0.0104247	1	False	-0.354839
8	20	0	0.00499775	1	False	-0.387097
8	21	0	0.00225537	1	False	-0.419355
8	22	1	0.000954102	1	False	-0.451613
8	23	0	0.000376539	1	False	-0.483871
8	24	1	0.000137854	1	False	-0.516129
8	25	0	4.65135e-05	1	False	-0.548387
8	26	0	1.43545e-05	0.778561	False	-0.580645
8	27	0	4.01611e-06	0.217826	False	-0.612903
8	28	0	1.00821e-06	0.0546831	False	-0.645161
8	29	0	2.24379e-07	0.0121698	True	-0.677419
8	30	0	4.36466e-08	0.00236731	True	-0.709677
8	31	0	7.29795e-09	0.000395826	True	-0.741935
9	0	0	0.00392399	1	False	0.290323
9	1	1	0.0156453	1	False	0.258065
9	2	3	0.0460816	1	False	0.225806
9	3	9	0.107994	1	False	0.193548
9	4	18	0.212061	1	False	0.16129
9	5	21	0.362169	1	False	0.129032
9	6	16	0.553111	1	False	0.0967742
9	7	16	0.771633	1	False	0.0645161
9	8	16	1	1	False	0.0322581
9	9	28	1	1	False	0
9	10	26	1	1	False	-0.0322581
9	11	25	0.785869	1	False	-0.0645161
9	12	13	0.591481	1	False	-0.0967742
9	13	11	0.425859	1	False	-0.129032
9	14	11	0.292973	1	False	-0.16129
9	15	19	0.192345	1	False	-0.193548
9	16	8	0.120334	1	False	-0.225806
9	17	1	0.0716099	1	False	-0.258065
9	18	1	0.0404492	1	False	-0.290323
9	19	2	0.0216312	1	False	-0.322581
9	20	1	0.0109182	1	False	-0.354839
9	21	0	0.00518263	1	False	-0.387097
9	22	0	0.00230368	1	False	-0.419355
9	23	2	0.000954102	1	False	-0.451613
9	24	4	0.000366044	1	False	-0.483871
9	25	1	0.000129204	1	False	-0.516129
9	26	0	4.1626e-05	1	False	-0.548387
9	27	0	1.21271e-05	0.65775	False	-0.580645
9	28	0	3.16019e-06	0.171402	False	-0.612903
9	29	0	7.27202e-07	0.039442	True	-0.645161
9	30	0	1.45544e-07	0.00789401	True	-0.677419
9	31	0	2.4883e-08	0.00134961	True	-0.709677
10	0	1	0.0018856	1	False	0.322581
10	1	0	0.00782505	1	False	0.290323
10	2	3	0.0244372	1	False	0.258065
10	3	7	0.0612236	1	False	0.225806
10	4	8	0.12883	1	False	0.193548
10	5	9	0.23554	1	False	0.16129
10	6	16	0.383907	1	False	0.129032
10	7	16	0.569105	1	False	0.0967742
10	8	22	0.779638	1	False	0.0645161
10	9	24	1	1	False	0.0322581
10	10	32	1	1	False	0
10	11	32	1	1	False	-0.0322581
10	12	17	0.790676	1	False	-0.0645161
10	13	23	0.59902	1	False	-0.0967742
10	14	24	0.434095	1	False	-0.129032
10	15	27	0.300397	1	False	-0.16129
10	16	13	0.198147	1	False	-0.193548
10	17	7	0.12433	1	False	-0.225806
10	18	2	0.0740367	1	False	-0.258065
10	19	3	0.0417258	1	False	-0.290323
10	20	1	0.0221846	1	False	-0.322581
10	21	0	0.0110852	1	False	-0.354839
10	22	1	0.00518263	1	False	-0.387097
10	23	0	0.00225537	1	False	-0.419355
10	24	0	0.000908026	1	False	-0.451613
10	25	0	0.000335813	1	False	-0.483871
10	26	2	0.000113132	1	False	-0.516129
10	27	0	3.43791e-05	1	False	-0.548387
10	28	0	9.31529e-06	0.505243	False	-0.580645
10	29	0	2.21992e-06	0.120404	False	-0.612903
10	30	0	4.57757e-07	0.0248278	True	-0.645161
10	31	0	8.00973e-08	0.00434432	True	-0.677419
11	0	0	0.000886062	1	False	0.354839
11	1	1	0.00381466	1	False	0.322581
11	2	2	0.0125661	1	False	0.290323
11	3	8	0.0334845	1	False	0.258065
11	4	5	0.0751883	1	False	0.225806
11	5	7	0.146724	1	False	0.193548
11	6	7	0.254811	1	False	0.16129
11	7	13	0.401261	1	False	0.129032
11	8	25	0.581666	1	False	0.0967742
11	9	23	0.785869	1	False	0.0645161
11	10	24	1	1	False	0.0322581
11	11	20	1	1	False	0
11	12	25	1	1	False	-0.0322581
11	13	28	0.794297	1	False	-0.0645161
11	14	19	0.604604	1	False	-0.0967742
11	15	21	0.440049	1	False	-0.129032
11	16	17	0.305568	1	False	-0.16129
11	17	13	0.201959	1	False	-0.193548
11	18	6	0.126715	1	False	-0.225806
11	19	4	0.0752516	1	False	-0.258065
11	20	3	0.0421535	1	False	-0.290323
11	21	0	0.0221846	1	False	-0.322581
11	22	0	0.0109182	1	False	-0.354839
11	23	1	0.00499775	1	False	-0.387097
11	24	0	0.00211423	1	False	-0.419355
11	25	0	0.000820426	1	False	-0.451613
11	26	0	0.000289475	1	False	-0.483871
11	27	0	9.19084e-05	1	False	-0.516129
11	28	1	2.5937e-05	1	False	-0.548387
11	29	0	6.41112e-06	0.347726	False	-0.580645
11	30	0	1.36383e-06	0.0739716	False	-0.612903
11	31	0	2.44453e-07	0.0132586	True	-0.645161
12	0	0	0.000406227	1	False	0.387097
12	1	0	0.00180977	1	False	0.354839
12	2	2	0.00626236	1	False	0.322581
12	3	0	0.0176721	1	False	0.290323
12	4	3	0.0421862	1	False	0.258065
12	5	6	0.0876155	1	False	0.225806
12	6	10	0.161827	1	False	0.193548
12	7	13	0.270502	1	False	0.16129
12	8	23	0.415051	1	False	0.129032
12	9	15	0.591481	1	False	0.0967742
12	10	17	0.790676	1	False	0.0645161
12	11	21	1	1	False	0.0322581
12	12	27	1	1	False	0
12	13	26	1	1	False	-0.0322581
12	14	20	0.796893	1	False	-0.0645161
12	15	20	0.608453	1	False	-0.0967742
12	16	26	0.443918	1	False	-0.129032
12	17	18	0.30862	1	False	-0.16129
12	18	12	0.203849	1	False	-0.193548
12	19	3	0.127508	1	False	-0.225806
12	20	1	0.0752516	1	False	-0.258065
12	21	0	0.0417258	1	False	-0.290323
12	22	0	0.0216312	1	False	-0.322581
12	23	0	0.0104247	1	False	-0.354839
12	24	0	0.00463926	1	False	-0.387097
12	25	1	0.00189157	1	False	-0.419355
12	26	1	0.00070008	1	False	-0.451613
12	27	0	0.000232616	1	False	-0.483871
12	28	0	6.84842e-05	1	False	-0.516129
12	29	0	1.75856e-05	0.95381	False	-0.548387
12	30	0	3.86441e-06	0.209598	False	-0.580645
12	31	0	7.10103e-07	0.0385146	True	-0.612903
13	0	0	0.000181291	1	False	0.419355
13	1	1	0.000834138	1	False	0.387097
13	2	1	0.00302169	1	False	0.354839
13	3	1	0.00899727	1	False	0.322581
13	4	6	0.0227574	1	False	0.290323
13	5	8	0.0501673	1	False	0.258065
13	6	7	0.0983594	1	False	0.225806
13	7	11	0.174338	1	False	0.193548
13	8	16	0.2831	1	False	0.16129
13	9	15	0.425859	1	False	0.129032
13	10	13	0.59902	1	False	0.0967742
13	11	17	0.794297	1	False	0.0645161
13	12	30	1	1	False	0.0322581
13	13	34	1	1	False	0
13	14	12	1	1	False	-0.0322581
13	15	26	0.79857	1	False	-0.0645161
13	16	18	0.610709	1	False	-0.0967742
13	17	12	0.445823	1	False	-0.129032
13	18	6	0.309629	1	False	-0.16129
13	19	8	0.203849	1	False	-0.193548
13	20	4	0.126715	1	False	-0.225806
13	21	1	0.0740367	1	False	-0.258065
13	22	1	0.0404492	1	False	-0.290323
13	23	1	0.0205403	1	False	-0.322581
13	24	0	0.00962669	1	False	-0.354839
13	25	0	0.00412972	1	False	-0.387097
13	26	0	0.00160572	1	False	-0.419355
13	27	0	0.000559289	1	False	-0.451613
13	28	0	0.000172075	1	False	-0.483871
13	29	0	4.59775e-05	1	False	-0.516129
13	30	0	1.04509e-05	0.566839	False	-0.548387
13	31	0	1.97035e-06	0.106868	False	-0.580645
14	0	2	7.85755e-05	1	False	0.451613
14	1	0	0.000372798	1	False	0.419355
14	2	0	0.0014098	1	False	0.387097
14	3	3	0.00441537	1	False	0.354839
14	4	4	0.0117984	1	False	0.322581
14	5	6	0.0275375	1	False	0.290323
14	6	7	0.0572034	1	False	0.258065
14	7	8	0.107382	1	False	0.225806
14	8	19	0.184455	1	False	0.193548
14	9	21	0.292973	1	False	0.16129
14	10	11	0.434095	1	False	0.129032
14	11	27	0.604604	1	False	0.0967742
14	12	17	0.796893	1	False	0.0645161
14	13	18	1	1	False	0.0322581
14	14	27	1	1	False	0
14	15	31	1	1	False	-0.0322581
14	16	17	0.799393	1	False	-0.0645161
14	17	17	0.611453	1	False	-0.0967742
14	18	20	0.445823	1	False	-0.129032
14	19	6	0.30862	1	False	-0.16129
14	20	9	0.201959	1	False	-0.193548
14	21	7	0.12433	1	False	-0.225806
14	22	3	0.0716099	1	False	-0.258065
14	23	1	0.0383433	1	False	-0.290323
14	24	0	0.0189451	1	False	-0.322581
14	25	0	0.00856226	1	False	-0.354839
14	26	3	0.00350301	1	False	-0.387097
14	27	0	0.00128125	1	False	-0.419355
14	28	0	0.000412698	1	False	-0.451613
14	29	0	0.000114941	1	False	-0.483871
14	30	0	2.70641e-05	1	False	-0.516129
14	31	0	5.23941e-06	0.284175	False	-0.548387
15	0	0	3.29968e-05	1	False	0.483871
15	1	0	0.000161221	1	False	0.451613
15	2	0	0.000634959	1	False	0.419355
15	3	0	0.00208607	1	False	0.387097
15	4	2	0.0058734	1	False	0.354839
15	5	6	0.0144807	1	False	0.322581
15	6	5	0.0318121	1	False	0.290323
15	7	8	0.0631649	1	False	0.258065
15	8	11	0.114696	1	False	0.225806
15	9	10	0.192345	1	False	0.193548
15	10	12	0.300397	1	False	0.16129
15	11	12	0.440049	1	False	0.129032
15	12	22	0.608453	1	False	0.0967742
15	13	23	0.79857	1	False	0.0645161
15	14	28	1	1	False	0.0322581
15	15	46	1	1	False	0
15	16	31	1	1	False	-0.0322581
15	17	26	0.799393	1	False	-0.0645162
15	18	23	0.610709	1	False	-0.0967742
15	19	23	0.443918	1	False	-0.129032
15	20	16	0.305568	1	False	-0.16129
15	21	13	0.198147	1	False	-0.193548
15	22	13	0.120334	1	False	-0.225806
15	23	1	0.0679797	1	False	-0.258065
15	24	1	0.0354445	1	False	-0.290323
15	25	3	0.0168991	1	False	-0.322581
15	26	2	0.00728658	1	False	-0.354839
15	27	0	0.00280378	1	False	-0.387097
15	28	0	0.000947327	1	False	-0.419355
15	29	0	0.000275534	1	False	-0.451613
15	30	0	6.73112e-05	1	False	-0.483871
15	31	0	1.33922e-05	0.726366	False	-0.516129
16	0	0	1.33922e-05	0.726366	False	0.516129
16	1	0	6.73112e-05	1	False	0.483871
16	2	0	0.000275534	1	False	0.451613
16	3	0	0.000947327	1	False	0.419355
16	4	0	0.00280378	1	False	0.387097
16	5	0	0.00728658	1	False	0.354839
16	6	4	0.0168991	1	False	0.322581
16	7	5	0.0354445	1	False	0.290323
16	8	13	0.0679797	1	False	0.258065
16	9	14	0.120334	1	False	0.225806
16	10	12	0.198147	1	False	0.193548
16	11	12	0.305568	1	False	0.16129
16	12	18	0.443918	1	False	0.129032
16	13	17	0.610709	1	False	0.0967742
16	14	21	0.799393	1	False	0.0645161
16	15	16	1	1	False	0.0322581
16	16	20	1	1	False	0
16	17	21	1	1	False	-0.0322581
16	18	19	0.79857	1	False	-0.0645161
16	19	38	0.608453	1	False	-0.0967742
16	20	10	0.440049	1	False	-0.129032
16	21	5	0.300397	1	False	-0.16129
16	22	8	0.192345	1	False	-0.193548
16	23	3	0.114696	1	False	-0.225806
16	24	1	0.0631649	1	False	-0.258065
16	25	0	0.0318121	1	False	-0.290323
16	26	1	0.0144807	1	False	-0.322581
16	27	1	0.0058734	1	False	-0.354839
16	28	0	0.00208607	1	False	-0.387097
16	29	0	0.000634959	1	False	-0.419355
16	30	0	0.000161221	1	False	-0.451613
16	31	0	3.29968e-05	1	False	-0.483871
17	0	2	5.23941e-06	0.284175	False	0.548387
17	1	0	2.70641e-05	1	False	0.516129
17	2	1	0.000114941	1	False	0.483871
17	3	0	0.000412698	1	False	0.451613
17	4	2	0.00128125	1	False	0.419355
17	5	2	0.00350301	1	False	0.387097
17	6	2	0.00856226	1	False	0.354839
17	7	4	0.0189451	1	False	0.322581
17	8	12	0.0383433	1	False	0.290323
17	9	27	0.0716099	1	False	0.258065
17	10	12	0.12433	1	False	0.225806
17	11	18	0.201959	1	False	0.193548
17	12	23	0.30862	1	False	0.16129
17	13	26	0.445823	1	False	0.129032
17	14	24	0.611453	1	False	0.0967742
17	15	25	0.799393	1	False	0.0645162
17	16	20	1	1	False	0.0322581
17	17	34	1	1	False	0
17	18	23	1	1	False	-0.032258
17	19	33	0.796893	1	False	-0.0645161
17	20	13	0.604604	1	False	-0.0967742
17	21	15	0.434095	1	False	-0.129032
17	22	12	0.292973	1	False	-0.16129
17	23	7	0.184455	1	False	-0.193548
17	24	6	0.107382	1	False	-0.225806
17	25	5	0.0572034	1	False	-0.258065
17	26	0	0.0275375	1	False	-0.290323
17	27	1	0.0117984	1	False	-0.322581
17	28	0	0.00441537	1	False	-0.354839
17	29	0	0.0014098	1	False	-0.387097
17	30	0	0.000372798	1	False	-0.419355
17	31	0	7.85755e-05	1	False	-0.451613
18	0	0	1.97035e-06	0.106868	False	0.580645
18	1	0	1.04509e-05	0.566839	False	0.548387
18	2	0	4.59775e-05	1	False	0.516129
18	3	0	0.000172075	1	False	0.483871
18	4	0	0.000559289	1	False	0.451613
18	5	0	0.00160572	1	False	0.419355
18	6	3	0.00412972	1	False	0.387097
18	7	6	0.00962669	1	False	0.354839
18	8	4	0.0205403	1	False	0.322581
18	9	13	0.0404492	1	False	0.290323
18	10	17	0.0740367	1	False	0.258065
18	11	25	0.126715	1	False	0.225806
18	12	16	0.203849	1	False	0.193548
18	13	30	0.309629	1	False	0.16129
18	14	16	0.445823	1	False	0.129032
18	15	31	0.610709	1	False	0.0967742
18	16	32	0.79857	1	False	0.0645161
18	17	50	1	1	False	0.032258
18	18	44	1	1	False	0
18	19	58	1	1	False	-0.0322581
18	20	22	0.794297	1	False	-0.0645161
18	21	13	0.59902	1	False	-0.0967742
18	22	10	0.425859	1	False	-0.129032
18	23	19	0.2831	1	False	-0.16129
18	24	20	0.174338	1	False	-0.193548
18	25	11	0.0983594	1	False	-0.225806
18	26	2	0.0501673	1	False	-0.258065
18	27	0	0.0227574	1	False	-0.290323
18	28	0	0.00899727	1	False	-0.322581
18	29	1	0.00302169	1	False	-0.354839
18	30	0	0.000834138	1	False	-0.387097
18	31	0	0.000181291	1	False	-0.419355
19	0	1	7.10103e-07	0.0385146	True	0.612903
19	1	0	3.86441e-06	0.209598	False	0.580645
19	2	0	1.75856e-05	0.95381	False	0.548387
19	3	0	6.84842e-05	1	False	0.516129
19	4	0	0.000232616	1	False	0.483871
19	5	0	0.00070008	1	False	0.451613
19	6	1	0.00189157	1	False	0.419355
19	7	2	0.00463926	1	False	0.387097
19	8	4	0.0104247	1	False	0.354839
19	9	7	0.0216312	1	False	0.322581
19	10	11	0.0417258	1	False	0.290323
19	11	8	0.0752516	1	False	0.258065
19	12	20	0.127508	1	False	0.225806
19	13	12	0.203849	1	False	0.193548
19	14	15	0.30862	1	False	0.16129
19	15	16	0.443918	1	False	0.129032
19	16	39	0.608453	1	False	0.0967742
19	17	22	0.796893	1	False	0.0645161
19	18	38	1	1	False	0.0322581
19	19	20	1	1	False	0
19	20	18	1	1	False	-0.032258
19	21	23	0.790676	1	False	-0.0645161
19	22	27	0.591481	1	False	-0.0967742
19	23	55	0.415051	1	False	-0.129032
19	24	31	0.270502	1	False	-0.16129
19	25	6	0.161827	1	False	-0.193548
19	26	4	0.0876155	1	False	-0.225806
19	27	2	0.0421862	1	False	-0.258065
19	28	3	0.0176721	1	False	-0.290323
19	29	1	0.00626236	1	False	-0.322581
19	30	0	0.00180977	1	False	-0.354839
19	31	0	0.000406227	1	False	-0.387097
20	0	1	2.44453e-07	0.0132586	True	0.645161
20	1	0	1.36383e-06	0.0739716	False	0.612903
20	2	1	6.41112e-06	0.347726	False	0.580645
20	3	0	2.5937e-05	1	False	0.548387
20	4	0	9.19084e-05	1	False	0.516129
20	5	1	0.000289475	1	False	0.483871
20	6	0	0.000820426	1	False	0.451613
20	7	2	0.00211423	1	False	0.419355
20	8	2	0.00499775	1	False	0.387097
20	9	5	0.0109182	1	False	0.354839
20	10	14	0.0221846	1	False	0.322581
20	11	13	0.0421535	1	False	0.290323
20	12	15	0.0752516	1	False	0.258065
20	13	16	0.126715	1	False	0.225806
20	14	26	0.201959	1	False	0.193548
20	15	20	0.305568	1	False	0.16129
20	16	31	0.440049	1	False	0.129032
20	17	22	0.604604	1	False	0.0967742
20	18	45	0.794297	1	False	0.0645161
20	19	35	1	1	False	0.032258
20	20	37	1	1	False	0
20	21	32	1	1	False	-0.0322581
20	22	24	0.785869	1	False	-0.0645161
20	23	24	0.581666	1	False	-0.0967742
20	24	61	0.401261	1	False	-0.129032
20	25	12	0.254811	1	False	-0.16129
20	26	8	0.146724	1	False	-0.193548
20	27	3	0.0751883	1	False	-0.225806
20	28	0	0.0334845	1	False	-0.258065
20	29	2	0.0125661	1	False	-0.290323
20	30	0	0.00381466	1	False	-0.322581
20	31	0	0.000886062	1	False	-0.354839
21	0	1	8.00973e-08	0.00434432	True	0.677419
21	1	0	4.57757e-07	0.0248278	True	0.645161
21	2	0	2.21992e-06	0.120404	False	0.612903
21	3	0	9.31529e-06	0.505243	False	0.580645
21	4	0	3.43791e-05	1	False	0.548387
21	5	1	0.000113132	1	False	0.516129
21	6	0	0.000335813	1	False	0.483871
21	7	0	0.000908026	1	False	0.451613
21	8	1	0.00225537	1	False	0.419355
21	9	1	0.00518263	1	False	0.387097
21	10	0	0.0110852	1	False	0.354839
21	11	6	0.0221846	1	False	0.322581
21	12	16	0.0417258	1	False	0.290323
21	13	16	0.0740367	1	False	0.258065
21	14	9	0.12433	1	False	0.225806
21	15	24	0.198147	1	False	0.193548
21	16	10	0.300397	1	False	0.16129
21	17	27	0.434095	1	False	0.129032
21	18	30	0.59902	1	False	0.0967742
21	19	23	0.790676	1	False	0.0645161
21	20	25	1	1	False	0.0322581
21	21	22	1	1	False	0
21	22	22	1	1	False	-0.032258
21	23	17	0.779638	1	False	-0.0645161
21	24	21	0.569105	1	False	-0.0967742
21	25	16	0.383907	1	False	-0.129032
21	26	17	0.23554	1	False	-0.16129
21	27	13	0.12883	1	False	-0.193548
21	28	4	0.0612236	1	False	-0.225806
21	29	11	0.0244372	1	False	-0.258065
21	30	0	0.00782505	1	False	-0.290323
21	31	0	0.0018856	1	False	-0.322581
22	0	0	2.4883e-08	0.00134961	True	0.709677
22	1	0	1.45544e-07	0.00789401	True	0.677419
22	2	0	7.27202e-07	0.039442	True	0.645161
22	3	0	3.16019e-06	0.171402	False	0.612903
22	4	0	1.21271e-05	0.65775	False	0.580645
22	5	0	4.1626e-05	1	False	0.548387
22	6	0	0.000129204	1	False	0.516129
22	7	2	0.000366044	1	False	0.483871
22	8	0	0.000954102	1	False	0.451613
22	9	0	0.00230368	1	False	0.419355
22	10	0	0.00518263	1	False	0.387097
22	11	4	0.0109182	1	False	0.354839
22	12	4	0.0216312	1	False	0.322581
22	13	13	0.0404492	1	False	0.290323
22	14	9	0.0716099	1	False	0.258065
22	15	9	0.120334	1	False	0.225806
22	16	24	0.192345	1	False	0.193548
22	17	10	0.292973	1	False	0.16129
22	18	21	0.425859	1	False	0.129032
22	19	31	0.591481	1	False	0.0967742
22	20	28	0.785869	1	False	0.0645161
22	21	27	1	1	False	0.032258
22	22	27	1	1	False	0
22	23	23	1	1	False	-0.0322581
22	24	21	0.771633	1	False	-0.0645161
22	25	25	0.553111	1	False	-0.0967742
22	26	41	0.362169	1	False	-0.129032
22	27	19	0.212061	1	False	-0.16129
22	28	12	0.107994	1	False	-0.193548
22	29	8	0.0460816	1	False	-0.225806
22	30	5	0.0156453	1	False	-0.258065
22	31	0	0.00392399	1	False	-0.290323
23	0	2	7.29795e-09	0.000395826	True	0.741935
23	1	0	4.36466e-08	0.00236731	True	0.709677
23	2	0	2.24379e-07	0.0121698	True	0.677419
23	3	0	1.00821e-06	0.0546831	False	0.645161
23	4	0	4.01611e-06	0.217826	False	0.612903
23	5	0	1.43545e-05	0.778561	False	0.580645
23	6	0	4.65135e-05	1	False	0.548387
23	7	0	0.000137854	1	False	0.516129
23	8	0	0.000376539	1	False	0.483871
23	9	1	0.000954102	1	False	0.451613
23	10	0	0.00225537	1	False	0.419355
23	11	7	0.00499775	1	False	0.387097
23	12	5	0.0104247	1	False	0.354839
23	13	5	0.0205403	1	False	0.322581
23	14	10	0.0383433	1	False	0.290323
23	15	6	0.0679797	1	False	0.258065
23	16	11	0.114696	1	False	0.225806
23	17	23	0.184455	1	False	0.193548
23	18	19	0.2831	1	False	0.16129
23	19	27	0.415051	1	False	0.129032
23	20	33	0.581666	1	False	0.0967742
23	21	41	0.779638	1	False	0.0645161
23	22	37	1	1	False	0.0322581
23	23	23	1	1	False	0
23	24	37	1	1	False	-0.032258
23	25	27	0.761321	1	False	-0.0645161
23	26	23	0.532654	1	False	-0.0967742
23	27	13	0.334863	1	False	-0.129032
23	28	12	0.183596	1	False	-0.16129
23	29	12	0.0842592	1	False	-0.193548
23	30	10	0.0305292	1	False	-0.225806
23	31	4	0.00800477	1	False	-0.258065
24	0	2	2.01129e-09	0.000109088	True	0.774194
24	1	0	1.22862e-08	0.000666376	True	0.741935
24	2	0	6.48916e-08	0.00351959	True	0.709677
24	3	1	3.00984e-07	0.0163248	True	0.677419
24	4	0	1.24234e-06	0.0673818	False	0.645161
24	5	0	4.61543e-06	0.250332	False	0.612903
24	6	0	1.55851e-05	0.845303	False	0.580645
24	7	0	4.8238e-05	1	False	0.548387
24	8	1	0.000137854	1	False	0.516129
24	9	0	0.000366044	1	False	0.483871
24	10	1	0.000908026	1	False	0.451613
24	11	1	0.00211423	1	False	0.419355
24	12	2	0.00463926	1	False	0.387097
24	13	1	0.00962669	1	False	0.354839
24	14	4	0.0189451	1	False	0.322581
24	15	5	0.0354445	1	False	0.290323
24	16	11	0.0631649	1	False	0.258065
24	17	19	0.107382	1	False	0.225806
24	18	23	0.174338	1	False	0.193548
24	19	22	0.270502	1	False	0.16129
24	20	30	0.401261	1	False	0.129032
24	21	25	0.569105	1	False	0.0967742
24	22	34	0.771633	1	False	0.0645161
24	23	38	1	1	False	0.032258
24	24	39	1	1	False	0
24	25	38	1	1	False	-0.0322581
24	26	28	0.747866	1	False	-0.0645161
24	27	29	0.506126	1	False	-0.0967742
24	28	15	0.300251	1	False	-0.129032
24	29	10	0.149273	1	False	-0.16129
24	30	10	0.0581995	1	False	-0.193548
24	31	8	0.0160499	1	False	-0.225806
25	0	4	5.18176e-10	2.81048e-05	True	0.806452
25	1	0	3.22902e-09	0.000175136	True	0.774194
25	2	0	1.74944e-08	0.00094886	True	0.741935
25	3	0	8.36101e-08	0.00453485	True	0.709677
25	4	0	3.56912e-07	0.0193582	True	0.677419
25	5	0	1.37553e-06	0.074606	False	0.645161
25	6	0	4.8308e-06	0.262013	False	0.612903
25	7	0	1.55851e-05	0.845303	False	0.580645
25	8	0	4.65135e-05	1	False	0.548387
25	9	0	0.000129204	1	False	0.516129
25	10	1	0.000335813	1	False	0.483871
25	11	0	0.000820426	1	False	0.451613
25	12	0	0.00189157	1	False	0.419355
25	13	2	0.00412972	1	False	0.387097
25	14	5	0.00856226	1	False	0.354839
25	15	6	0.0168991	1	False	0.322581
25	16	7	0.0318121	1	False	0.290323
25	17	14	0.0572034	1	False	0.258065
25	18	10	0.0983594	1	False	0.225806
25	19	12	0.161827	1	False	0.193548
25	20	23	0.254811	1	False	0.16129
25	21	28	0.383907	1	False	0.129032
25	22	31	0.553111	1	False	0.0967742
25	23	48	0.761321	1	False	0.0645161
25	24	34	1	1	False	0.0322581
25	25	69	1	1	False	0
25	26	62	1	1	False	-0.032258
25	27	65	0.72987	1	False	-0.0645161
25	28	29	0.470877	1	False	-0.0967742
25	29	20	0.255741	1	False	-0.129032
25	30	8	0.108453	1	False	-0.16129
25	31	4	0.0317287	1	False	-0.193548
26	0	4	1.24085e-10	6.7301e-06	True	0.83871
26	1	0	7.87654e-10	4.27208e-05	True	0.806452
26	2	0	4.36965e-09	0.000237001	True	0.774194
26	3	0	2.14758e-08	0.00116481	True	0.741935
26	4	0	9.46103e-08	0.00513147	True	0.709677
26	5	0	3.77425e-07	0.0204708	True	0.677419
26	6	0	1.37553e-06	0.074606	False	0.645161
26	7	0	4.61543e-06	0.250332	False	0.612903
26	8	0	1.43545e-05	0.778561	False	0.580645
26	9	0	4.1626e-05	1	False	0.548387
26	10	0	0.000113132	1	False	0.516129
26	11	1	0.000289475	1	False	0.483871
26	12	0	0.00070008	1	False	0.451613
26	13	1	0.00160572	1	False	0.419355
26	14	3	0.00350301	1	False	0.387097
26	15	2	0.00728658	1	False	0.354839
26	16	8	0.0144807	1	False	0.322581
26	17	5	0.0275375	1	False	0.290323
26	18	7	0.0501673	1	False	0.258065
26	19	15	0.0876155	1	False	0.225806
26	20	27	0.146724	1	False	0.193548
26	21	27	0.23554	1	False	0.16129
26	22	23	0.362169	1	False	0.129032
26	23	47	0.532654	1	False	0.0967742
26	24	51	0.747866	1	False	0.0645161
26	25	62	1	1	False	0.032258
26	26	53	1	1	False	0
26	27	49	1	1	False	-0.0322581
26	28	31	0.704808	1	False	-0.0645161
26	29	22	0.42221	1	False	-0.0967742
26	30	12	0.197507	1	False	-0.129032
26	31	14	0.0620884	1	False	-0.16129
27	0	8	2.74426e-11	1.48843e-06	True	0.870968
27	1	0	1.77144e-10	9.60794e-06	True	0.83871
27	2	0	1.00425e-09	5.44687e-05	True	0.806452
27	3	0	5.06423e-09	0.000274674	True	0.774194
27	4	0	2.29692e-08	0.0012458	True	0.741935
27	5	0	9.46103e-08	0.00513147	True	0.709677
27	6	0	3.56912e-07	0.0193582	True	0.677419
27	7	0	1.24234e-06	0.0673818	False	0.645161
27	8	0	4.01611e-06	0.217826	False	0.612903
27	9	0	1.21271e-05	0.65775	False	0.580645
27	10	0	3.43791e-05	1	False	0.548387
27	11	2	9.19084e-05	1	False	0.516129
27	12	0	0.000232616	1	False	0.483871
27	13	1	0.000559289	1	False	0.451613
27	14	1	0.00128125	1	False	0.419355
27	15	2	0.00280378	1	False	0.387097
27	16	2	0.0058734	1	False	0.354839
27	17	7	0.0117984	1	False	0.322581
27	18	8	0.0227574	1	False	0.290323
27	19	5	0.0421862	1	False	0.258065
27	20	12	0.0751883	1	False	0.225806
27	21	13	0.12883	1	False	0.193548
27	22	21	0.212061	1	False	0.16129
27	23	48	0.334863	1	False	0.129032
27	24	95	0.506126	1	False	0.0967742
27	25	66	0.72987	1	False	0.0645161
27	26	64	1	1	False	0.0322581
27	27	83	1	1	False	0
27	28	48	1	1	False	-0.032258
27	29	45	0.667514	1	False	-0.0645161
27	30	27	0.350907	1	False	-0.0967742
27	31	17	0.120935	1	False	-0.129032
28	0	6	5.56566e-12	3.0187e-07	True	0.903226
28	1	0	3.64599e-11	1.97751e-06	True	0.870968
28	2	0	2.10727e-10	1.14294e-05	True	0.83871
28	3	0	1.08751e-09	5.89845e-05	True	0.806452
28	4	0	5.06423e-09	0.000274674	True	0.774194
28	5	0	2.14758e-08	0.00116481	True	0.741935
28	6	0	8.36101e-08	0.00453485	True	0.709677
28	7	0	3.00984e-07	0.0163248	True	0.677419
28	8	0	1.00821e-06	0.0546831	False	0.645161
28	9	0	3.16019e-06	0.171402	False	0.612903
28	10	1	9.31529e-06	0.505243	False	0.580645
28	11	0	2.5937e-05	1	False	0.548387
28	12	0	6.84842e-05	1	False	0.516129
28	13	2	0.000172075	1	False	0.483871
28	14	1	0.000412698	1	False	0.451613
28	15	0	0.000947327	1	False	0.419355
28	16	1	0.00208607	1	False	0.387097
28	17	0	0.00441537	1	False	0.354839
28	18	1	0.00899727	1	False	0.322581
28	19	5	0.0176721	1	False	0.290323
28	20	12	0.0334845	1	False	0.258065
28	21	8	0.0612236	1	False	0.225806
28	22	20	0.107994	1	False	0.193548
28	23	40	0.183596	1	False	0.16129
28	24	48	0.300251	1	False	0.129032
28	25	68	0.470877	1	False	0.0967742
28	26	86	0.704808	1	False	0.0645161
28	27	83	1	1	False	0.032258
28	28	71	1	1	False	0
28	29	67	1	1	False	-0.0322581
28	30	62	0.605188	1	False	-0.0645161
28	31	51	0.236534	1	False	-0.0967742
29	0	21	1.02685e-12	5.5694e-08	True	0.935484
29	1	0	6.81044e-12	3.69385e-07	True	0.903226
29	2	0	4.00192e-11	2.17056e-06	True	0.870968
29	3	0	2.10727e-10	1.14294e-05	True	0.83871
29	4	0	1.00425e-09	5.44687e-05	True	0.806452
29	5	0	4.36965e-09	0.000237001	True	0.774194
29	6	0	1.74944e-08	0.00094886	True	0.741935
29	7	0	6.48916e-08	0.00351959	True	0.709677
29	8	0	2.24379e-07	0.0121698	True	0.677419
29	9	0	7.27202e-07	0.039442	True	0.645161
29	10	0	2.21992e-06	0.120404	False	0.612903
29	11	0	6.41112e-06	0.347726	False	0.580645
29	12	1	1.75856e-05	0.95381	False	0.548387
29	13	0	4.59775e-05	1	False	0.516129
29	14	0	0.000114941	1	False	0.483871
29	15	0	0.000275534	1	False	0.451613
29	16	0	0.000634959	1	False	0.419355
29	17	2	0.0014098	1	False	0.387097
29	18	2	0.00302169	1	False	0.354839
29	19	10	0.00626236	1	False	0.322581
29	20	7	0.0125661	1	False	0.290323
29	21	12	0.0244372	1	False	0.258065
29	22	9	0.0460816	1	False	0.225806
29	23	23	0.0842592	1	False	0.193548
29	24	41	0.149273	1	False	0.16129
29	25	51	0.255741	1	False	0.129032
29	26	106	0.42221	1	False	0.0967742
29	27	153	0.667514	1	False	0.0645161
29	28	152	1	1	False	0.0322581
29	29	152	1	1	False	0
29	30	169	1	1	False	-0.032258
29	31	124	0.472267	1	False	-0.0645161
30	0	28	1.70863e-13	9.26728e-09	True	0.967742
30	1	0	1.14364e-12	6.20288e-08	True	0.935484
30	2	0	6.81044e-12	3.69385e-07	True	0.903226
30	3	1	3.64599e-11	1.97751e-06	True	0.870968
30	4	0	1.77144e-10	9.60794e-06	True	0.83871
30	5	0	7.87654e-10	4.27208e-05	True	0.806452
30	6	0	3.22902e-09	0.000175136	True	0.774194
30	7	0	1.22862e-08	0.000666376	True	0.741935
30	8	0	4.36466e-08	0.00236731	True	0.709677
30	9	0	1.45544e-07	0.00789401	True	0.677419
30	10	3	4.57757e-07	0.0248278	True	0.645161
30	11	0	1.36383e-06	0.0739716	False	0.612903
30	12	0	3.86441e-06	0.209598	False	0.580645
30	13	0	1.04509e-05	0.566839	False	0.548387
30	14	2	2.70641e-05	1	False	0.516129
30	15	0	6.73112e-05	1	False	0.483871
30	16	2	0.000161221	1	False	0.451613
30	17	1	0.000372798	1	False	0.419355
30	18	0	0.000834138	1	False	0.387097
30	19	1	0.00180977	1	False	0.354839
30	20	7	0.00381466	1	False	0.322581
30	21	5	0.00782505	1	False	0.290323
30	22	8	0.0156453	1	False	0.258065
30	23	8	0.0305292	1	False	0.225806
30	24	17	0.0581995	1	False	0.193548
30	25	47	0.108453	1	False	0.16129
30	26	85	0.197507	1	False	0.129032
30	27	117	0.350907	1	False	0.0967742
30	28	157	0.605188	1	False	0.0645161
30	29	225	1	1	False	0.032258
30	30	372	1	1	False	0
30	31	616	1	1	False	-0.0322581
31	0	51	2.53131e-14	1.37293e-09	True	1
31	1	1	1.70863e-13	9.26728e-09	True	0.967742
31	2	0	1.02685e-12	5.5694e-08	True	0.935484
31	3	0	5.56566e-12	3.0187e-07	True	0.903226
31	4	1	2.74426e-11	1.48843e-06	True	0.870968
31	5	0	1.24085e-10	6.7301e-06	True	0.83871
31	6	0	5.18176e-10	2.81048e-05	True	0.806452
31	7	0	2.01129e-09	0.000109088	True	0.774194
31	8	0	7.29795e-09	0.000395826	True	0.741935
31	9	0	2.4883e-08	0.00134961	True	0.709677
31	10	2	8.00973e-08	0.00434432	True	0.677419
31	11	1	2.44453e-07	0.0132586	True	0.645161
31	12	0	7.10103e-07	0.0385146	True	0.612903
31	13	0	1.97035e-06	0.106868	False	0.580645
31	14	0	5.23941e-06	0.284175	False	0.548387
31	15	4	1.33922e-05	0.726366	False	0.516129
31	16	2	3.29968e-05	1	False	0.483871
31	17	2	7.85755e-05	1	False	0.451613
31	18	0	0.000181291	1	False	0.419355
31	19	3	0.000406227	1	False	0.387097
31	20	1	0.000886062	1	False	0.354839
31	21	2	0.0018856	1	False	0.322581
31	22	0	0.00392399	1	False	0.290323
31	23	3	0.00800477	1	False	0.258065
31	24	9	0.0160499	1	False	0.225806
31	25	18	0.0317287	1	False	0.193548
31	26	33	0.0620884	1	False	0.16129
31	27	91	0.120935	1	False	0.129032
31	28	162	0.236534	1	False	0.0967742
31	29	368	0.472267	1	False	0.0645161
31	30	1445	1	1	False	0.0322581
31	31	36259	1	1	False	0
