# Supplementary material for: The rise and fall of the ancient northern pike master sex-determining gene
Source: eLife. 2021 Jan 28;10:e62858. doi: 10.7554/eLife.62858 (PMC7870143; doi:10.7554/eLife.62858)
Supplement: Figure 3—source data 5. [file elife-62858-fig3-data5.csv]

M	F	Markers	P	CorrectedP	Signif	Bias
0	1	793	1	1	False	-0.0333333
0	2	61	0.472021	1	False	-0.0666667
0	3	19	0.236137	1	False	-0.1
0	4	7	0.120507	1	False	-0.133333
0	5	1	0.0617067	1	False	-0.166667
0	6	1	0.0314243	1	False	-0.2
0	7	1	0.015826	1	False	-0.233333
0	8	0	0.00785031	1	False	-0.266667
0	9	0	0.00382303	1	False	-0.3
0	10	0	0.00182274	1	False	-0.333333
0	11	0	0.000848636	1	False	-0.366667
0	12	0	0.000384888	1	False	-0.4
0	13	0	0.000169629	1	False	-0.433333
0	14	0	7.24662e-05	1	False	-0.466667
0	15	0	2.99306e-05	0.872118	False	-0.5
0	16	0	1.19194e-05	0.347308	False	-0.533333
0	17	0	4.56341e-06	0.132969	False	-0.566667
0	18	0	1.67441e-06	0.0487891	True	-0.6
0	19	0	5.8682e-07	0.0170988	True	-0.633333
0	20	0	1.95713e-07	0.00570268	True	-0.666667
0	21	0	6.18669e-08	0.00180268	True	-0.7
0	22	0	1.84546e-08	0.000537731	True	-0.733333
0	23	0	5.16947e-09	0.000150628	True	-0.766667
0	24	0	1.35251e-09	3.94094e-05	True	-0.8
0	25	0	3.2854e-10	9.57299e-06	True	-0.833333
0	26	0	7.36026e-11	2.14463e-06	True	-0.866667
0	27	0	1.50943e-11	4.39817e-07	True	-0.9
0	28	0	2.80997e-12	8.1877e-08	True	-0.933333
0	29	0	4.70401e-13	1.37066e-08	True	-0.966667
0	30	0	7.00551e-14	2.04126e-09	True	-1
1	0	604	1	1	False	0.0333333
1	1	129	1	1	False	0
1	2	52	1	1	False	-0.0333333
1	3	35	0.604773	1	False	-0.0666667
1	4	13	0.350201	1	False	-0.1
1	5	5	0.196706	1	False	-0.133333
1	6	0	0.107703	1	False	-0.166667
1	7	3	0.0575794	1	False	-0.2
1	8	0	0.0300596	1	False	-0.233333
1	9	0	0.0153138	1	False	-0.266667
1	10	0	0.00760459	1	False	-0.3
1	11	0	0.00367561	1	False	-0.333333
1	12	0	0.00172627	1	False	-0.366667
1	13	0	0.000786302	1	False	-0.4
1	14	0	0.000346619	1	False	-0.433333
1	15	0	0.000147535	1	False	-0.466667
1	16	0	6.04803e-05	1	False	-0.5
1	17	0	2.38124e-05	0.693845	False	-0.533333
1	18	0	8.97714e-06	0.261576	False	-0.566667
1	19	0	3.22973e-06	0.0941079	False	-0.6
1	20	0	1.10481e-06	0.032192	True	-0.633333
1	21	0	3.5788e-07	0.0104279	True	-0.666667
1	22	0	1.09285e-07	0.00318435	True	-0.7
1	23	0	3.13034e-08	0.000912119	True	-0.733333
1	24	0	8.36407e-09	0.000243712	True	-0.766667
1	25	0	2.07179e-09	6.03678e-05	True	-0.8
1	26	0	4.72453e-10	1.37663e-05	True	-0.833333
1	27	0	9.84158e-11	2.86764e-06	True	-0.866667
1	28	0	1.85626e-11	5.40877e-07	True	-0.9
1	29	0	3.13871e-12	9.14558e-08	True	-0.933333
1	30	0	4.70401e-13	1.37066e-08	True	-0.966667
2	0	76	0.472021	1	False	0.0666667
2	1	66	1	1	False	0.0333333
2	2	57	1	1	False	0
2	3	28	1	1	False	-0.0333333
2	4	21	0.666955	1	False	-0.0666667
2	5	20	0.421223	1	False	-0.1
2	6	7	0.254565	1	False	-0.133333
2	7	2	0.14812	1	False	-0.166667
2	8	3	0.0832645	1	False	-0.2
2	9	0	0.0453004	1	False	-0.233333
2	10	0	0.0238684	1	False	-0.266667
2	11	1	0.0121779	1	False	-0.3
2	12	0	0.0060124	1	False	-0.333333
2	13	0	0.00286911	1	False	-0.366667
2	14	0	0.00132132	1	False	-0.4
2	15	0	0.000586159	1	False	-0.433333
2	16	0	0.000249927	1	False	-0.466667
2	17	0	0.000102165	1	False	-0.5
2	18	0	3.9924e-05	1	False	-0.533333
2	19	0	1.48666e-05	0.433183	False	-0.566667
2	20	0	5.25609e-06	0.153152	False	-0.6
2	21	0	1.75723e-06	0.0512022	False	-0.633333
2	22	0	5.53023e-07	0.016114	True	-0.666667
2	23	0	1.63005e-07	0.00474964	True	-0.7
2	24	0	4.47437e-08	0.00130374	True	-0.733333
2	25	0	1.13647e-08	0.000331145	True	-0.766667
2	26	0	2.65184e-09	7.72694e-05	True	-0.8
2	27	0	5.63847e-10	1.64294e-05	True	-0.833333
2	28	0	1.08239e-10	3.15386e-06	True	-0.866667
2	29	0	1.85626e-11	5.40877e-07	True	-0.9
2	30	0	2.80997e-12	8.1877e-08	True	-0.933333
3	0	32	0.236137	1	False	0.1
3	1	30	0.604773	1	False	0.0666667
3	2	39	1	1	False	0.0333333
3	3	32	1	1	False	0
3	4	30	1	1	False	-0.0333333
3	5	34	0.704111	1	False	-0.0666667
3	6	20	0.469618	1	False	-0.1
3	7	16	0.298698	1	False	-0.133333
3	8	3	0.182017	1	False	-0.166667
3	9	2	0.106583	1	False	-0.2
3	10	0	0.0600795	1	False	-0.233333
3	11	2	0.0326275	1	False	-0.266667
3	12	1	0.0170727	1	False	-0.3
3	13	0	0.00860315	1	False	-0.333333
3	14	0	0.00417076	1	False	-0.366667
3	15	0	0.00194241	1	False	-0.4
3	16	0	0.00086741	1	False	-0.433333
3	17	0	0.000370577	1	False	-0.466667
3	18	0	0.000151058	1	False	-0.5
3	19	0	5.85703e-05	1	False	-0.533333
3	20	0	2.15252e-05	0.6272	False	-0.566667
3	21	0	7.46803e-06	0.217604	False	-0.6
3	22	0	2.4349e-06	0.0709481	False	-0.633333
3	23	0	7.42226e-07	0.021627	True	-0.666667
3	24	0	2.10302e-07	0.00612778	True	-0.7
3	25	1	5.50224e-08	0.00160324	True	-0.733333
3	26	0	1.3194e-08	0.000384445	True	-0.766667
3	27	0	2.87511e-09	8.3775e-05	True	-0.8
3	28	0	5.63847e-10	1.64294e-05	True	-0.833333
3	29	0	9.84158e-11	2.86764e-06	True	-0.866667
3	30	0	1.50943e-11	4.39817e-07	True	-0.9
4	0	14	0.120507	1	False	0.133333
4	1	18	0.350201	1	False	0.1
4	2	19	0.666955	1	False	0.0666667
4	3	24	1	1	False	0.0333333
4	4	23	1	1	False	0
4	5	24	1	1	False	-0.0333333
4	6	17	0.729034	1	False	-0.0666667
4	7	18	0.50459	1	False	-0.1
4	8	6	0.332922	1	False	-0.133333
4	9	9	0.210034	1	False	-0.166667
4	10	3	0.126968	1	False	-0.2
4	11	1	0.0736383	1	False	-0.233333
4	12	0	0.0409971	1	False	-0.266667
4	13	1	0.021908	1	False	-0.3
4	14	0	0.0112299	1	False	-0.333333
4	15	0	0.00551541	1	False	-0.366667
4	16	0	0.00259128	1	False	-0.4
4	17	0	0.00116223	1	False	-0.433333
4	18	0	0.000496388	1	False	-0.466667
4	19	0	0.000201286	1	False	-0.5
4	20	0	7.72268e-05	1	False	-0.533333
4	21	0	2.79221e-05	0.813593	False	-0.566667
4	22	0	9.47036e-06	0.275947	False	-0.6
4	23	0	2.99746e-06	0.08734	False	-0.633333
4	24	0	8.80076e-07	0.0256436	True	-0.666667
4	25	0	2.38073e-07	0.00693698	True	-0.7
4	26	0	5.88776e-08	0.00171558	True	-0.733333
4	27	0	1.3194e-08	0.000384445	True	-0.766667
4	28	0	2.65184e-09	7.72694e-05	True	-0.8
4	29	0	4.72453e-10	1.37663e-05	True	-0.833333
4	30	0	7.36026e-11	2.14463e-06	True	-0.866667
5	0	3	0.0617067	1	False	0.166667
5	1	16	0.196706	1	False	0.133333
5	2	7	0.421223	1	False	0.1
5	3	20	0.704111	1	False	0.0666667
5	4	20	1	1	False	0.0333333
5	5	20	1	1	False	0
5	6	14	1	1	False	-0.0333333
5	7	17	0.746886	1	False	-0.0666667
5	8	14	0.530832	1	False	-0.1
5	9	11	0.359823	1	False	-0.133333
5	10	13	0.233038	1	False	-0.166667
5	11	5	0.144377	1	False	-0.2
5	12	4	0.0856199	1	False	-0.233333
5	13	1	0.0486066	1	False	-0.266667
5	14	1	0.0264035	1	False	-0.3
5	15	0	0.0137108	1	False	-0.333333
5	16	0	0.00679639	1	False	-0.366667
5	17	0	0.00320979	1	False	-0.4
5	18	0	0.00144085	1	False	-0.433333
5	19	0	0.00061299	1	False	-0.466667
5	20	0	0.000246316	1	False	-0.5
5	21	0	9.31111e-05	1	False	-0.533333
5	22	0	3.2959e-05	0.96036	False	-0.566667
5	23	0	1.08667e-05	0.316633	False	-0.6
5	24	0	3.31671e-06	0.0966423	False	-0.633333
5	25	0	9.30573e-07	0.027115	True	-0.666667
5	26	0	2.38073e-07	0.00693698	True	-0.7
5	27	0	5.50224e-08	0.00160324	True	-0.733333
5	28	0	1.13647e-08	0.000331145	True	-0.766667
5	29	0	2.07179e-09	6.03678e-05	True	-0.8
5	30	0	3.2854e-10	9.57299e-06	True	-0.833333
6	0	1	0.0314243	1	False	0.2
6	1	7	0.107703	1	False	0.166667
6	2	21	0.254565	1	False	0.133333
6	3	9	0.469618	1	False	0.1
6	4	31	0.729034	1	False	0.0666667
6	5	13	1	1	False	0.0333333
6	6	16	1	1	False	0
6	7	23	1	1	False	-0.0333333
6	8	15	0.760188	1	False	-0.0666667
6	9	16	0.550985	1	False	-0.1
6	10	13	0.381133	1	False	-0.133333
6	11	8	0.251804	1	False	-0.166667
6	12	1	0.158956	1	False	-0.2
6	13	3	0.0958792	1	False	-0.233333
6	14	1	0.0552343	1	False	-0.266667
6	15	0	0.0303626	1	False	-0.3
6	16	1	0.0159045	1	False	-0.333333
6	17	0	0.00792419	1	False	-0.366667
6	18	0	0.00374648	1	False	-0.4
6	19	0	0.00167605	1	False	-0.433333
6	20	0	0.000707063	1	False	-0.466667
6	21	0	0.00028015	1	False	-0.5
6	22	0	0.000103763	1	False	-0.533333
6	23	0	3.57313e-05	1	False	-0.566667
6	24	0	1.13674e-05	0.331222	False	-0.6
6	25	0	3.31671e-06	0.0966423	False	-0.633333
6	26	0	8.80076e-07	0.0256436	True	-0.666667
6	27	0	2.10302e-07	0.00612778	True	-0.7
6	28	0	4.47437e-08	0.00130374	True	-0.733333
6	29	0	8.36407e-09	0.000243712	True	-0.766667
6	30	0	1.35251e-09	3.94094e-05	True	-0.8
7	0	1	0.015826	1	False	0.233333
7	1	0	0.0575794	1	False	0.2
7	2	7	0.14812	1	False	0.166667
7	3	6	0.298698	1	False	0.133333
7	4	12	0.50459	1	False	0.1
7	5	19	0.746886	1	False	0.0666667
7	6	21	1	1	False	0.0333333
7	7	23	1	1	False	0
7	8	20	1	1	False	-0.0333333
7	9	19	0.770335	1	False	-0.0666667
7	10	15	0.566652	1	False	-0.1
7	11	8	0.398025	1	False	-0.133333
7	12	8	0.266951	1	False	-0.166667
7	13	2	0.170904	1	False	-0.2
7	14	3	0.104377	1	False	-0.233333
7	15	1	0.0607516	1	False	-0.266667
7	16	1	0.0336512	1	False	-0.3
7	17	1	0.0177061	1	False	-0.333333
7	18	1	0.00882876	1	False	-0.366667
7	19	1	0.00415989	1	False	-0.4
7	20	0	0.00184572	1	False	-0.433333
7	21	0	0.000768022	1	False	-0.466667
7	22	0	0.000298274	1	False	-0.5
7	23	0	0.000107511	1	False	-0.533333
7	24	0	3.57313e-05	1	False	-0.566667
7	25	0	1.08667e-05	0.316633	False	-0.6
7	26	0	2.99746e-06	0.08734	False	-0.633333
7	27	0	7.42226e-07	0.021627	True	-0.666667
7	28	0	1.63005e-07	0.00474964	True	-0.7
7	29	0	3.13034e-08	0.000912119	True	-0.733333
7	30	0	5.16947e-09	0.000150628	True	-0.766667
8	0	0	0.00785031	1	False	0.266667
8	1	1	0.0300596	1	False	0.233333
8	2	5	0.0832645	1	False	0.2
8	3	9	0.182017	1	False	0.166667
8	4	16	0.332922	1	False	0.133333
8	5	23	0.530832	1	False	0.1
8	6	25	0.760188	1	False	0.0666667
8	7	17	1	1	False	0.0333333
8	8	21	1	1	False	0
8	9	16	1	1	False	-0.0333333
8	10	19	0.77816	1	False	-0.0666667
8	11	14	0.578856	1	False	-0.1
8	12	11	0.411314	1	False	-0.133333
8	13	15	0.278958	1	False	-0.166667
8	14	4	0.180408	1	False	-0.2
8	15	3	0.111122	1	False	-0.233333
8	16	1	0.0650867	1	False	-0.266667
8	17	2	0.0361806	1	False	-0.3
8	18	0	0.0190411	1	False	-0.333333
8	19	0	0.00945919	1	False	-0.366667
8	20	0	0.00441999	1	False	-0.4
8	21	0	0.00193449	1	False	-0.433333
8	22	0	0.000789113	1	False	-0.466667
8	23	0	0.000298274	1	False	-0.5
8	24	0	0.000103763	1	False	-0.533333
8	25	0	3.2959e-05	0.96036	False	-0.566667
8	26	0	9.47036e-06	0.275947	False	-0.6
8	27	1	2.4349e-06	0.0709481	False	-0.633333
8	28	0	5.53023e-07	0.016114	True	-0.666667
8	29	0	1.09285e-07	0.00318435	True	-0.7
8	30	0	1.84546e-08	0.000537731	True	-0.733333
9	0	0	0.00382303	1	False	0.3
9	1	1	0.0153138	1	False	0.266667
9	2	2	0.0453004	1	False	0.233333
9	3	4	0.106583	1	False	0.2
9	4	5	0.210034	1	False	0.166667
9	5	14	0.359823	1	False	0.133333
9	6	14	0.550985	1	False	0.1
9	7	27	0.770335	1	False	0.0666667
9	8	17	1	1	False	0.0333333
9	9	19	1	1	False	0
9	10	27	1	1	False	-0.0333333
9	11	13	0.784191	1	False	-0.0666667
9	12	10	0.588279	1	False	-0.1
9	13	14	0.42157	1	False	-0.133333
9	14	4	0.288184	1	False	-0.166667
9	15	4	0.187632	1	False	-0.2
9	16	7	0.116143	1	False	-0.233333
9	17	1	0.0682012	1	False	-0.266667
9	18	1	0.0378942	1	False	-0.3
9	19	3	0.0198606	1	False	-0.333333
9	20	0	0.00978249	1	False	-0.366667
9	21	0	0.0045087	1	False	-0.4
9	22	0	0.00193449	1	False	-0.433333
9	23	0	0.000768022	1	False	-0.466667
9	24	0	0.00028015	1	False	-0.5
9	25	0	9.31111e-05	1	False	-0.533333
9	26	0	2.79221e-05	0.813593	False	-0.566667
9	27	0	7.46803e-06	0.217604	False	-0.6
9	28	0	1.75723e-06	0.0512022	False	-0.633333
9	29	0	3.5788e-07	0.0104279	True	-0.666667
9	30	0	6.18669e-08	0.00180268	True	-0.7
10	0	0	0.00182274	1	False	0.333333
10	1	0	0.00760459	1	False	0.3
10	2	2	0.0238684	1	False	0.266667
10	3	4	0.0600795	1	False	0.233333
10	4	4	0.126968	1	False	0.2
10	5	9	0.233038	1	False	0.166667
10	6	13	0.381133	1	False	0.133333
10	7	13	0.566652	1	False	0.1
10	8	19	0.77816	1	False	0.0666667
10	9	14	1	1	False	0.0333333
10	10	19	1	1	False	0
10	11	13	1	1	False	-0.0333333
10	12	13	0.788776	1	False	-0.0666667
10	13	10	0.59538	1	False	-0.1
10	14	7	0.429195	1	False	-0.133333
10	15	10	0.294894	1	False	-0.166667
10	16	2	0.192703	1	False	-0.2
10	17	6	0.119471	1	False	-0.233333
10	18	0	0.0700755	1	False	-0.266667
10	19	2	0.0387587	1	False	-0.3
10	20	4	0.0201368	1	False	-0.333333
10	21	0	0.00978249	1	False	-0.366667
10	22	1	0.00441999	1	False	-0.4
10	23	0	0.00184572	1	False	-0.433333
10	24	0	0.000707063	1	False	-0.466667
10	25	0	0.000246316	1	False	-0.5
10	26	0	7.72268e-05	1	False	-0.533333
10	27	0	2.15252e-05	0.6272	False	-0.566667
10	28	0	5.25609e-06	0.153152	False	-0.6
10	29	0	1.10481e-06	0.032192	True	-0.633333
10	30	0	1.95713e-07	0.00570268	True	-0.666667
11	0	0	0.000848636	1	False	0.366667
11	1	1	0.00367561	1	False	0.333333
11	2	0	0.0121779	1	False	0.3
11	3	1	0.0326275	1	False	0.266667
11	4	0	0.0736383	1	False	0.233333
11	5	7	0.144377	1	False	0.2
11	6	10	0.251804	1	False	0.166667
11	7	8	0.398025	1	False	0.133333
11	8	19	0.578856	1	False	0.1
11	9	12	0.784191	1	False	0.0666667
11	10	20	1	1	False	0.0333333
11	11	20	1	1	False	0
11	12	20	1	1	False	-0.0333333
11	13	16	0.792147	1	False	-0.0666667
11	14	10	0.600471	1	False	-0.1
11	15	15	0.434464	1	False	-0.133333
11	16	6	0.299271	1	False	-0.166667
11	17	8	0.195709	1	False	-0.2
11	18	2	0.121128	1	False	-0.233333
11	19	0	0.0707011	1	False	-0.266667
11	20	4	0.0387587	1	False	-0.3
11	21	1	0.0198606	1	False	-0.333333
11	22	0	0.00945919	1	False	-0.366667
11	23	0	0.00415989	1	False	-0.4
11	24	0	0.00167605	1	False	-0.433333
11	25	0	0.00061299	1	False	-0.466667
11	26	0	0.000201286	1	False	-0.5
11	27	0	5.85703e-05	1	False	-0.533333
11	28	0	1.48666e-05	0.433183	False	-0.566667
11	29	0	3.22973e-06	0.0941079	False	-0.6
11	30	0	5.8682e-07	0.0170988	True	-0.633333
12	0	0	0.000384888	1	False	0.4
12	1	0	0.00172627	1	False	0.366667
12	2	0	0.0060124	1	False	0.333333
12	3	2	0.0170727	1	False	0.3
12	4	4	0.0409971	1	False	0.266667
12	5	5	0.0856199	1	False	0.233333
12	6	9	0.158956	1	False	0.2
12	7	7	0.266951	1	False	0.166667
12	8	9	0.411314	1	False	0.133333
12	9	15	0.588279	1	False	0.1
12	10	15	0.788776	1	False	0.0666667
12	11	12	1	1	False	0.0333333
12	12	12	1	1	False	0
12	13	15	1	1	False	-0.0333333
12	14	17	0.794459	1	False	-0.0666667
12	15	14	0.603761	1	False	-0.1
12	16	18	0.437558	1	False	-0.133333
12	17	13	0.301431	1	False	-0.166667
12	18	0	0.196706	1	False	-0.2
12	19	4	0.121128	1	False	-0.233333
12	20	0	0.0700755	1	False	-0.266667
12	21	3	0.0378942	1	False	-0.3
12	22	0	0.0190411	1	False	-0.333333
12	23	0	0.00882876	1	False	-0.366667
12	24	0	0.00374648	1	False	-0.4
12	25	0	0.00144085	1	False	-0.433333
12	26	0	0.000496388	1	False	-0.466667
12	27	0	0.000151058	1	False	-0.5
12	28	0	3.9924e-05	1	False	-0.533333
12	29	0	8.97714e-06	0.261576	False	-0.566667
12	30	0	1.67441e-06	0.0487891	True	-0.6
13	0	0	0.000169629	1	False	0.433333
13	1	0	0.000786302	1	False	0.4
13	2	0	0.00286911	1	False	0.366667
13	3	3	0.00860315	1	False	0.333333
13	4	1	0.021908	1	False	0.3
13	5	1	0.0486066	1	False	0.266667
13	6	4	0.0958792	1	False	0.233333
13	7	6	0.170904	1	False	0.2
13	8	9	0.278958	1	False	0.166667
13	9	6	0.42157	1	False	0.133333
13	10	12	0.59538	1	False	0.1
13	11	14	0.792147	1	False	0.0666667
13	12	18	1	1	False	0.0333333
13	13	22	1	1	False	0
13	14	20	1	1	False	-0.0333333
13	15	11	0.795809	1	False	-0.0666667
13	16	13	0.605376	1	False	-0.1
13	17	14	0.438578	1	False	-0.133333
13	18	12	0.301431	1	False	-0.166667
13	19	4	0.195709	1	False	-0.2
13	20	4	0.119471	1	False	-0.233333
13	21	5	0.0682012	1	False	-0.266667
13	22	3	0.0361806	1	False	-0.3
13	23	0	0.0177061	1	False	-0.333333
13	24	0	0.00792419	1	False	-0.366667
13	25	0	0.00320979	1	False	-0.4
13	26	0	0.00116223	1	False	-0.433333
13	27	0	0.000370577	1	False	-0.466667
13	28	0	0.000102165	1	False	-0.5
13	29	0	2.38124e-05	0.693845	False	-0.533333
13	30	0	4.56341e-06	0.132969	False	-0.566667
14	0	0	7.24662e-05	1	False	0.466667
14	1	0	0.000346619	1	False	0.433333
14	2	0	0.00132132	1	False	0.4
14	3	0	0.00417076	1	False	0.366667
14	4	0	0.0112299	1	False	0.333333
14	5	1	0.0264035	1	False	0.3
14	6	1	0.0552343	1	False	0.266667
14	7	2	0.104377	1	False	0.233333
14	8	6	0.180408	1	False	0.2
14	9	5	0.288184	1	False	0.166667
14	10	12	0.429195	1	False	0.133333
14	11	22	0.600471	1	False	0.1
14	12	19	0.794459	1	False	0.0666667
14	13	22	1	1	False	0.0333333
14	14	8	1	1	False	0
14	15	17	1	1	False	-0.0333333
14	16	22	0.796253	1	False	-0.0666667
14	17	19	0.605376	1	False	-0.1
14	18	18	0.437558	1	False	-0.133333
14	19	7	0.299271	1	False	-0.166667
14	20	4	0.192703	1	False	-0.2
14	21	3	0.116143	1	False	-0.233333
14	22	4	0.0650867	1	False	-0.266667
14	23	1	0.0336512	1	False	-0.3
14	24	0	0.0159045	1	False	-0.333333
14	25	0	0.00679639	1	False	-0.366667
14	26	0	0.00259128	1	False	-0.4
14	27	0	0.00086741	1	False	-0.433333
14	28	0	0.000249927	1	False	-0.466667
14	29	0	6.04803e-05	1	False	-0.5
14	30	0	1.19194e-05	0.347308	False	-0.533333
15	0	0	2.99306e-05	0.872118	False	0.5
15	1	0	0.000147535	1	False	0.466667
15	2	0	0.000586159	1	False	0.433333
15	3	0	0.00194241	1	False	0.4
15	4	0	0.00551541	1	False	0.366667
15	5	1	0.0137108	1	False	0.333333
15	6	2	0.0303626	1	False	0.3
15	7	3	0.0607516	1	False	0.266667
15	8	2	0.111122	1	False	0.233333
15	9	3	0.187632	1	False	0.2
15	10	14	0.294894	1	False	0.166667
15	11	15	0.434464	1	False	0.133333
15	12	19	0.603761	1	False	0.1
15	13	26	0.795809	1	False	0.0666667
15	14	23	1	1	False	0.0333333
15	15	16	1	1	False	0
15	16	23	1	1	False	-0.0333334
15	17	15	0.795809	1	False	-0.0666667
15	18	11	0.603761	1	False	-0.1
15	19	3	0.434464	1	False	-0.133333
15	20	7	0.294894	1	False	-0.166667
15	21	10	0.187632	1	False	-0.2
15	22	5	0.111122	1	False	-0.233333
15	23	5	0.0607516	1	False	-0.266667
15	24	1	0.0303626	1	False	-0.3
15	25	0	0.0137108	1	False	-0.333333
15	26	0	0.00551541	1	False	-0.366667
15	27	0	0.00194241	1	False	-0.4
15	28	0	0.000586159	1	False	-0.433333
15	29	0	0.000147535	1	False	-0.466667
15	30	0	2.99306e-05	0.872118	False	-0.5
16	0	0	1.19194e-05	0.347308	False	0.533333
16	1	0	6.04803e-05	1	False	0.5
16	2	0	0.000249927	1	False	0.466667
16	3	0	0.00086741	1	False	0.433333
16	4	0	0.00259128	1	False	0.4
16	5	1	0.00679639	1	False	0.366667
16	6	1	0.0159045	1	False	0.333333
16	7	0	0.0336512	1	False	0.3
16	8	2	0.0650867	1	False	0.266667
16	9	2	0.116143	1	False	0.233333
16	10	3	0.192703	1	False	0.2
16	11	11	0.299271	1	False	0.166667
16	12	20	0.437558	1	False	0.133333
16	13	18	0.605376	1	False	0.1
16	14	20	0.796253	1	False	0.0666667
16	15	17	1	1	False	0.0333334
16	16	18	1	1	False	0
16	17	21	1	1	False	-0.0333333
16	18	26	0.794459	1	False	-0.0666667
16	19	18	0.600471	1	False	-0.1
16	20	7	0.429195	1	False	-0.133333
16	21	8	0.288184	1	False	-0.166667
16	22	0	0.180408	1	False	-0.2
16	23	0	0.104377	1	False	-0.233333
16	24	1	0.0552343	1	False	-0.266667
16	25	0	0.0264035	1	False	-0.3
16	26	0	0.0112299	1	False	-0.333333
16	27	0	0.00417076	1	False	-0.366667
16	28	0	0.00132132	1	False	-0.4
16	29	0	0.000346619	1	False	-0.433333
16	30	0	7.24662e-05	1	False	-0.466667
17	0	0	4.56341e-06	0.132969	False	0.566667
17	1	0	2.38124e-05	0.693845	False	0.533333
17	2	0	0.000102165	1	False	0.5
17	3	0	0.000370577	1	False	0.466667
17	4	0	0.00116223	1	False	0.433333
17	5	0	0.00320979	1	False	0.4
17	6	1	0.00792419	1	False	0.366667
17	7	3	0.0177061	1	False	0.333333
17	8	1	0.0361806	1	False	0.3
17	9	0	0.0682012	1	False	0.266667
17	10	5	0.119471	1	False	0.233333
17	11	7	0.195709	1	False	0.2
17	12	5	0.301431	1	False	0.166667
17	13	10	0.438578	1	False	0.133333
17	14	26	0.605376	1	False	0.1
17	15	24	0.795809	1	False	0.0666667
17	16	25	1	1	False	0.0333333
17	17	21	1	1	False	0
17	18	19	1	1	False	-0.0333334
17	19	16	0.792147	1	False	-0.0666667
17	20	16	0.59538	1	False	-0.1
17	21	18	0.42157	1	False	-0.133333
17	22	10	0.278958	1	False	-0.166667
17	23	5	0.170904	1	False	-0.2
17	24	3	0.0958792	1	False	-0.233333
17	25	3	0.0486066	1	False	-0.266667
17	26	0	0.021908	1	False	-0.3
17	27	0	0.00860315	1	False	-0.333333
17	28	0	0.00286911	1	False	-0.366667
17	29	0	0.000786302	1	False	-0.4
17	30	0	0.000169629	1	False	-0.433333
18	0	0	1.67441e-06	0.0487891	True	0.6
18	1	0	8.97714e-06	0.261576	False	0.566667
18	2	0	3.9924e-05	1	False	0.533333
18	3	0	0.000151058	1	False	0.5
18	4	0	0.000496388	1	False	0.466667
18	5	0	0.00144085	1	False	0.433333
18	6	0	0.00374648	1	False	0.4
18	7	0	0.00882876	1	False	0.366667
18	8	0	0.0190411	1	False	0.333333
18	9	2	0.0378942	1	False	0.3
18	10	1	0.0700755	1	False	0.266667
18	11	10	0.121128	1	False	0.233333
18	12	11	0.196706	1	False	0.2
18	13	11	0.301431	1	False	0.166667
18	14	14	0.437558	1	False	0.133333
18	15	17	0.603761	1	False	0.1
18	16	20	0.794459	1	False	0.0666667
18	17	23	1	1	False	0.0333334
18	18	31	1	1	False	0
18	19	18	1	1	False	-0.0333333
18	20	11	0.788776	1	False	-0.0666667
18	21	15	0.588279	1	False	-0.1
18	22	10	0.411314	1	False	-0.133333
18	23	8	0.266951	1	False	-0.166667
18	24	2	0.158956	1	False	-0.2
18	25	1	0.0856199	1	False	-0.233333
18	26	2	0.0409971	1	False	-0.266667
18	27	0	0.0170727	1	False	-0.3
18	28	0	0.0060124	1	False	-0.333333
18	29	0	0.00172627	1	False	-0.366667
18	30	0	0.000384888	1	False	-0.4
19	0	0	5.8682e-07	0.0170988	True	0.633333
19	1	0	3.22973e-06	0.0941079	False	0.6
19	2	0	1.48666e-05	0.433183	False	0.566667
19	3	0	5.85703e-05	1	False	0.533333
19	4	0	0.000201286	1	False	0.5
19	5	0	0.00061299	1	False	0.466667
19	6	0	0.00167605	1	False	0.433333
19	7	0	0.00415989	1	False	0.4
19	8	2	0.00945919	1	False	0.366667
19	9	0	0.0198606	1	False	0.333333
19	10	1	0.0387587	1	False	0.3
19	11	3	0.0707011	1	False	0.266667
19	12	7	0.121128	1	False	0.233333
19	13	8	0.195709	1	False	0.2
19	14	10	0.299271	1	False	0.166667
19	15	8	0.434464	1	False	0.133333
19	16	14	0.600471	1	False	0.1
19	17	15	0.792147	1	False	0.0666667
19	18	19	1	1	False	0.0333333
19	19	15	1	1	False	0
19	20	26	1	1	False	-0.0333334
19	21	24	0.784191	1	False	-0.0666667
19	22	21	0.578856	1	False	-0.1
19	23	8	0.398025	1	False	-0.133333
19	24	2	0.251804	1	False	-0.166667
19	25	6	0.144377	1	False	-0.2
19	26	3	0.0736383	1	False	-0.233333
19	27	3	0.0326275	1	False	-0.266667
19	28	0	0.0121779	1	False	-0.3
19	29	0	0.00367561	1	False	-0.333333
19	30	0	0.000848636	1	False	-0.366667
20	0	0	1.95713e-07	0.00570268	True	0.666667
20	1	0	1.10481e-06	0.032192	True	0.633333
20	2	0	5.25609e-06	0.153152	False	0.6
20	3	0	2.15252e-05	0.6272	False	0.566667
20	4	0	7.72268e-05	1	False	0.533333
20	5	0	0.000246316	1	False	0.5
20	6	0	0.000707063	1	False	0.466667
20	7	0	0.00184572	1	False	0.433333
20	8	0	0.00441999	1	False	0.4
20	9	0	0.00978249	1	False	0.366667
20	10	1	0.0201368	1	False	0.333333
20	11	0	0.0387587	1	False	0.3
20	12	3	0.0700755	1	False	0.266667
20	13	3	0.119471	1	False	0.233333
20	14	8	0.192703	1	False	0.2
20	15	4	0.294894	1	False	0.166667
20	16	4	0.429195	1	False	0.133333
20	17	15	0.59538	1	False	0.1
20	18	25	0.788776	1	False	0.0666667
20	19	19	1	1	False	0.0333334
20	20	23	1	1	False	0
20	21	21	1	1	False	-0.0333333
20	22	13	0.77816	1	False	-0.0666667
20	23	13	0.566652	1	False	-0.1
20	24	13	0.381133	1	False	-0.133333
20	25	8	0.233038	1	False	-0.166667
20	26	10	0.126968	1	False	-0.2
20	27	2	0.0600795	1	False	-0.233333
20	28	0	0.0238684	1	False	-0.266667
20	29	0	0.00760459	1	False	-0.3
20	30	0	0.00182274	1	False	-0.333333
21	0	0	6.18669e-08	0.00180268	True	0.7
21	1	0	3.5788e-07	0.0104279	True	0.666667
21	2	0	1.75723e-06	0.0512022	False	0.633333
21	3	0	7.46803e-06	0.217604	False	0.6
21	4	0	2.79221e-05	0.813593	False	0.566667
21	5	0	9.31111e-05	1	False	0.533333
21	6	0	0.00028015	1	False	0.5
21	7	0	0.000768022	1	False	0.466667
21	8	1	0.00193449	1	False	0.433333
21	9	0	0.0045087	1	False	0.4
21	10	1	0.00978249	1	False	0.366667
21	11	1	0.0198606	1	False	0.333333
21	12	2	0.0378942	1	False	0.3
21	13	4	0.0682012	1	False	0.266667
21	14	3	0.116143	1	False	0.233333
21	15	7	0.187632	1	False	0.2
21	16	14	0.288184	1	False	0.166667
21	17	21	0.42157	1	False	0.133333
21	18	26	0.588279	1	False	0.1
21	19	29	0.784191	1	False	0.0666667
21	20	22	1	1	False	0.0333333
21	21	17	1	1	False	0
21	22	18	1	1	False	-0.0333334
21	23	23	0.770335	1	False	-0.0666667
21	24	9	0.550985	1	False	-0.1
21	25	13	0.359823	1	False	-0.133333
21	26	8	0.210034	1	False	-0.166667
21	27	2	0.106583	1	False	-0.2
21	28	5	0.0453004	1	False	-0.233333
21	29	0	0.0153138	1	False	-0.266667
21	30	0	0.00382303	1	False	-0.3
22	0	0	1.84546e-08	0.000537731	True	0.733333
22	1	0	1.09285e-07	0.00318435	True	0.7
22	2	0	5.53023e-07	0.016114	True	0.666667
22	3	0	2.4349e-06	0.0709481	False	0.633333
22	4	0	9.47036e-06	0.275947	False	0.6
22	5	0	3.2959e-05	0.96036	False	0.566667
22	6	0	0.000103763	1	False	0.533333
22	7	0	0.000298274	1	False	0.5
22	8	0	0.000789113	1	False	0.466667
22	9	0	0.00193449	1	False	0.433333
22	10	0	0.00441999	1	False	0.4
22	11	0	0.00945919	1	False	0.366667
22	12	0	0.0190411	1	False	0.333333
22	13	2	0.0361806	1	False	0.3
22	14	2	0.0650867	1	False	0.266667
22	15	3	0.111122	1	False	0.233333
22	16	12	0.180408	1	False	0.2
22	17	13	0.278958	1	False	0.166667
22	18	10	0.411314	1	False	0.133333
22	19	24	0.578856	1	False	0.1
22	20	25	0.77816	1	False	0.0666667
22	21	36	1	1	False	0.0333334
22	22	34	1	1	False	0
22	23	18	1	1	False	-0.0333333
22	24	28	0.760188	1	False	-0.0666667
22	25	16	0.530832	1	False	-0.1
22	26	8	0.332922	1	False	-0.133333
22	27	9	0.182017	1	False	-0.166667
22	28	7	0.0832645	1	False	-0.2
22	29	1	0.0300596	1	False	-0.233333
22	30	1	0.00785031	1	False	-0.266667
23	0	0	5.16947e-09	0.000150628	True	0.766667
23	1	0	3.13034e-08	0.000912119	True	0.733333
23	2	0	1.63005e-07	0.00474964	True	0.7
23	3	0	7.42226e-07	0.021627	True	0.666667
23	4	0	2.99746e-06	0.08734	False	0.633333
23	5	0	1.08667e-05	0.316633	False	0.6
23	6	0	3.57313e-05	1	False	0.566667
23	7	0	0.000107511	1	False	0.533333
23	8	0	0.000298274	1	False	0.5
23	9	0	0.000768022	1	False	0.466667
23	10	0	0.00184572	1	False	0.433333
23	11	0	0.00415989	1	False	0.4
23	12	3	0.00882876	1	False	0.366667
23	13	2	0.0177061	1	False	0.333333
23	14	4	0.0336512	1	False	0.3
23	15	4	0.0607516	1	False	0.266667
23	16	5	0.104377	1	False	0.233333
23	17	11	0.170904	1	False	0.2
23	18	9	0.266951	1	False	0.166667
23	19	9	0.398025	1	False	0.133333
23	20	17	0.566652	1	False	0.1
23	21	25	0.770335	1	False	0.0666667
23	22	33	1	1	False	0.0333333
23	23	28	1	1	False	0
23	24	34	1	1	False	-0.0333334
23	25	16	0.746886	1	False	-0.0666667
23	26	21	0.50459	1	False	-0.1
23	27	13	0.298698	1	False	-0.133333
23	28	7	0.14812	1	False	-0.166667
23	29	0	0.0575794	1	False	-0.2
23	30	0	0.015826	1	False	-0.233333
24	0	0	1.35251e-09	3.94094e-05	True	0.8
24	1	0	8.36407e-09	0.000243712	True	0.766667
24	2	0	4.47437e-08	0.00130374	True	0.733333
24	3	0	2.10302e-07	0.00612778	True	0.7
24	4	0	8.80076e-07	0.0256436	True	0.666667
24	5	0	3.31671e-06	0.0966423	False	0.633333
24	6	0	1.13674e-05	0.331222	False	0.6
24	7	0	3.57313e-05	1	False	0.566667
24	8	0	0.000103763	1	False	0.533333
24	9	0	0.00028015	1	False	0.5
24	10	0	0.000707063	1	False	0.466667
24	11	0	0.00167605	1	False	0.433333
24	12	0	0.00374648	1	False	0.4
24	13	0	0.00792419	1	False	0.366667
24	14	0	0.0159045	1	False	0.333333
24	15	2	0.0303626	1	False	0.3
24	16	2	0.0552343	1	False	0.266667
24	17	5	0.0958792	1	False	0.233333
24	18	8	0.158956	1	False	0.2
24	19	9	0.251804	1	False	0.166667
24	20	16	0.381133	1	False	0.133333
24	21	17	0.550985	1	False	0.1
24	22	30	0.760188	1	False	0.0666667
24	23	31	1	1	False	0.0333334
24	24	40	1	1	False	0
24	25	40	1	1	False	-0.0333333
24	26	22	0.729034	1	False	-0.0666667
24	27	22	0.469618	1	False	-0.1
24	28	9	0.254565	1	False	-0.133333
24	29	6	0.107703	1	False	-0.166667
24	30	1	0.0314243	1	False	-0.2
25	0	0	3.2854e-10	9.57299e-06	True	0.833333
25	1	0	2.07179e-09	6.03678e-05	True	0.8
25	2	0	1.13647e-08	0.000331145	True	0.766667
25	3	0	5.50224e-08	0.00160324	True	0.733333
25	4	0	2.38073e-07	0.00693698	True	0.7
25	5	0	9.30573e-07	0.027115	True	0.666667
25	6	0	3.31671e-06	0.0966423	False	0.633333
25	7	0	1.08667e-05	0.316633	False	0.6
25	8	0	3.2959e-05	0.96036	False	0.566667
25	9	0	9.31111e-05	1	False	0.533333
25	10	0	0.000246316	1	False	0.5
25	11	0	0.00061299	1	False	0.466667
25	12	0	0.00144085	1	False	0.433333
25	13	0	0.00320979	1	False	0.4
25	14	1	0.00679639	1	False	0.366667
25	15	1	0.0137108	1	False	0.333333
25	16	1	0.0264035	1	False	0.3
25	17	3	0.0486066	1	False	0.266667
25	18	4	0.0856199	1	False	0.233333
25	19	4	0.144377	1	False	0.2
25	20	11	0.233038	1	False	0.166667
25	21	15	0.359823	1	False	0.133333
25	22	28	0.530832	1	False	0.1
25	23	44	0.746886	1	False	0.0666667
25	24	34	1	1	False	0.0333333
25	25	22	1	1	False	0
25	26	37	1	1	False	-0.0333334
25	27	33	0.704111	1	False	-0.0666667
25	28	20	0.421223	1	False	-0.1
25	29	5	0.196706	1	False	-0.133333
25	30	0	0.0617067	1	False	-0.166667
26	0	0	7.36026e-11	2.14463e-06	True	0.866667
26	1	0	4.72453e-10	1.37663e-05	True	0.833333
26	2	0	2.65184e-09	7.72694e-05	True	0.8
26	3	0	1.3194e-08	0.000384445	True	0.766667
26	4	0	5.88776e-08	0.00171558	True	0.733333
26	5	0	2.38073e-07	0.00693698	True	0.7
26	6	0	8.80076e-07	0.0256436	True	0.666667
26	7	0	2.99746e-06	0.08734	False	0.633333
26	8	0	9.47036e-06	0.275947	False	0.6
26	9	0	2.79221e-05	0.813593	False	0.566667
26	10	0	7.72268e-05	1	False	0.533333
26	11	0	0.000201286	1	False	0.5
26	12	0	0.000496388	1	False	0.466667
26	13	0	0.00116223	1	False	0.433333
26	14	0	0.00259128	1	False	0.4
26	15	0	0.00551541	1	False	0.366667
26	16	1	0.0112299	1	False	0.333333
26	17	1	0.021908	1	False	0.3
26	18	3	0.0409971	1	False	0.266667
26	19	3	0.0736383	1	False	0.233333
26	20	14	0.126968	1	False	0.2
26	21	15	0.210034	1	False	0.166667
26	22	22	0.332922	1	False	0.133333
26	23	29	0.50459	1	False	0.1
26	24	33	0.729034	1	False	0.0666667
26	25	43	1	1	False	0.0333334
26	26	52	1	1	False	0
26	27	45	1	1	False	-0.0333333
26	28	51	0.666955	1	False	-0.0666667
26	29	24	0.350201	1	False	-0.1
26	30	5	0.120507	1	False	-0.133333
27	0	0	1.50943e-11	4.39817e-07	True	0.9
27	1	0	9.84158e-11	2.86764e-06	True	0.866667
27	2	0	5.63847e-10	1.64294e-05	True	0.833333
27	3	0	2.87511e-09	8.3775e-05	True	0.8
27	4	0	1.3194e-08	0.000384445	True	0.766667
27	5	0	5.50224e-08	0.00160324	True	0.733333
27	6	0	2.10302e-07	0.00612778	True	0.7
27	7	0	7.42226e-07	0.021627	True	0.666667
27	8	0	2.4349e-06	0.0709481	False	0.633333
27	9	0	7.46803e-06	0.217604	False	0.6
27	10	0	2.15252e-05	0.6272	False	0.566667
27	11	0	5.85703e-05	1	False	0.533333
27	12	0	0.000151058	1	False	0.5
27	13	0	0.000370577	1	False	0.466667
27	14	0	0.00086741	1	False	0.433333
27	15	0	0.00194241	1	False	0.4
27	16	0	0.00417076	1	False	0.366667
27	17	1	0.00860315	1	False	0.333333
27	18	0	0.0170727	1	False	0.3
27	19	3	0.0326275	1	False	0.266667
27	20	6	0.0600795	1	False	0.233333
27	21	10	0.106583	1	False	0.2
27	22	14	0.182017	1	False	0.166667
27	23	21	0.298698	1	False	0.133333
27	24	36	0.469618	1	False	0.1
27	25	47	0.704111	1	False	0.0666667
27	26	48	1	1	False	0.0333333
27	27	49	1	1	False	0
27	28	68	1	1	False	-0.0333334
27	29	31	0.604773	1	False	-0.0666667
27	30	24	0.236137	1	False	-0.1
28	0	0	2.80997e-12	8.1877e-08	True	0.933333
28	1	0	1.85626e-11	5.40877e-07	True	0.9
28	2	0	1.08239e-10	3.15386e-06	True	0.866667
28	3	0	5.63847e-10	1.64294e-05	True	0.833333
28	4	0	2.65184e-09	7.72694e-05	True	0.8
28	5	0	1.13647e-08	0.000331145	True	0.766667
28	6	0	4.47437e-08	0.00130374	True	0.733333
28	7	0	1.63005e-07	0.00474964	True	0.7
28	8	0	5.53023e-07	0.016114	True	0.666667
28	9	0	1.75723e-06	0.0512022	False	0.633333
28	10	0	5.25609e-06	0.153152	False	0.6
28	11	0	1.48666e-05	0.433183	False	0.566667
28	12	0	3.9924e-05	1	False	0.533333
28	13	0	0.000102165	1	False	0.5
28	14	0	0.000249927	1	False	0.466667
28	15	0	0.000586159	1	False	0.433333
28	16	0	0.00132132	1	False	0.4
28	17	2	0.00286911	1	False	0.366667
28	18	0	0.0060124	1	False	0.333333
28	19	2	0.0121779	1	False	0.3
28	20	3	0.0238684	1	False	0.266667
28	21	5	0.0453004	1	False	0.233333
28	22	6	0.0832645	1	False	0.2
28	23	7	0.14812	1	False	0.166667
28	24	21	0.254565	1	False	0.133333
28	25	24	0.421223	1	False	0.1
28	26	50	0.666955	1	False	0.0666667
28	27	62	1	1	False	0.0333334
28	28	89	1	1	False	0
28	29	81	1	1	False	-0.0333333
28	30	60	0.472021	1	False	-0.0666667
29	0	0	4.70401e-13	1.37066e-08	True	0.966667
29	1	0	3.13871e-12	9.14558e-08	True	0.933333
29	2	0	1.85626e-11	5.40877e-07	True	0.9
29	3	0	9.84158e-11	2.86764e-06	True	0.866667
29	4	0	4.72453e-10	1.37663e-05	True	0.833333
29	5	0	2.07179e-09	6.03678e-05	True	0.8
29	6	0	8.36407e-09	0.000243712	True	0.766667
29	7	0	3.13034e-08	0.000912119	True	0.733333
29	8	0	1.09285e-07	0.00318435	True	0.7
29	9	0	3.5788e-07	0.0104279	True	0.666667
29	10	0	1.10481e-06	0.032192	True	0.633333
29	11	0	3.22973e-06	0.0941079	False	0.6
29	12	0	8.97714e-06	0.261576	False	0.566667
29	13	0	2.38124e-05	0.693845	False	0.533333
29	14	0	6.04803e-05	1	False	0.5
29	15	0	0.000147535	1	False	0.466667
29	16	0	0.000346619	1	False	0.433333
29	17	0	0.000786302	1	False	0.4
29	18	0	0.00172627	1	False	0.366667
29	19	0	0.00367561	1	False	0.333333
29	20	1	0.00760459	1	False	0.3
29	21	3	0.0153138	1	False	0.266667
29	22	1	0.0300596	1	False	0.233333
29	23	9	0.0575794	1	False	0.2
29	24	23	0.107703	1	False	0.166667
29	25	19	0.196706	1	False	0.133333
29	26	43	0.350201	1	False	0.1
29	27	62	0.604773	1	False	0.0666667
29	28	115	1	1	False	0.0333333
29	29	193	1	1	False	0
29	30	162	1	1	False	-0.0333334
30	0	0	7.00551e-14	2.04126e-09	True	1
30	1	0	4.70401e-13	1.37066e-08	True	0.966667
30	2	0	2.80997e-12	8.1877e-08	True	0.933333
30	3	0	1.50943e-11	4.39817e-07	True	0.9
30	4	0	7.36026e-11	2.14463e-06	True	0.866667
30	5	0	3.2854e-10	9.57299e-06	True	0.833333
30	6	0	1.35251e-09	3.94094e-05	True	0.8
30	7	0	5.16947e-09	0.000150628	True	0.766667
30	8	0	1.84546e-08	0.000537731	True	0.733333
30	9	0	6.18669e-08	0.00180268	True	0.7
30	10	0	1.95713e-07	0.00570268	True	0.666667
30	11	0	5.8682e-07	0.0170988	True	0.633333
30	12	0	1.67441e-06	0.0487891	True	0.6
30	13	0	4.56341e-06	0.132969	False	0.566667
30	14	0	1.19194e-05	0.347308	False	0.533333
30	15	0	2.99306e-05	0.872118	False	0.5
30	16	0	7.24662e-05	1	False	0.466667
30	17	0	0.000169629	1	False	0.433333
30	18	0	0.000384888	1	False	0.4
30	19	0	0.000848636	1	False	0.366667
30	20	1	0.00182274	1	False	0.333333
30	21	0	0.00382303	1	False	0.3
30	22	0	0.00785031	1	False	0.266667
30	23	1	0.015826	1	False	0.233333
30	24	5	0.0314243	1	False	0.2
30	25	12	0.0617067	1	False	0.166667
30	26	33	0.120507	1	False	0.133333
30	27	58	0.236137	1	False	0.1
30	28	125	0.472021	1	False	0.0666667
30	29	487	1	1	False	0.0333334
30	30	20010	1	1	False	0
