# Supplementary material for: The rise and fall of the ancient northern pike master sex-determining gene
Source: eLife. 2021 Jan 28;10:e62858. doi: 10.7554/eLife.62858 (PMC7870143; doi:10.7554/eLife.62858)
Supplement: Figure 4—source data 1. [file elife-62858-fig4-data1.csv]

Contig	Position	Length	Snps_females	Snps_males	Fst	Abs_depth_females	Abs_depth_males	Rel_depth_females	Rel_depth_males	Depth_ratio
CM015574.1_RaGOO	0	45724411	0	1	0.0000	34	32	0.94	0.86	1.06
CM015574.1_RaGOO	50000	45724411	1	1	0.0000	35	38	0.99	1.01	0.94
CM015574.1_RaGOO	100000	45724411	0	0	0.0000	32	34	0.90	0.91	0.94
CM015574.1_RaGOO	150000	45724411	0	4	0.0000	32	33	0.88	0.88	0.95
CM015574.1_RaGOO	200000	45724411	6	1	0.0000	34	35	0.94	0.94	0.96
CM015574.1_RaGOO	250000	45724411	0	1	0.0000	31	33	0.86	0.87	0.95
CM015574.1_RaGOO	300000	45724411	2	5	0.0000	32	33	0.89	0.89	0.96
CM015574.1_RaGOO	350000	45724411	0	4	0.0000	31	34	0.87	0.90	0.94
CM015574.1_RaGOO	400000	45724411	0	0	0.0000	30	32	0.85	0.85	0.96
CM015574.1_RaGOO	450000	45724411	0	0	0.0000	36	37	1.00	0.98	0.99
CM015574.1_RaGOO	500000	45724411	0	5	0.0000	30	32	0.84	0.86	0.94
CM015574.1_RaGOO	550000	45724411	0	0	0.0000	33	33	0.91	0.89	0.98
CM015574.1_RaGOO	600000	45724411	0	4	0.0000	37	38	1.02	1.03	0.95
CM015574.1_RaGOO	650000	45724411	0	2	0.0000	30	31	0.84	0.82	0.97
CM015574.1_RaGOO	700000	45724411	1	1	0.0000	28	30	0.78	0.80	0.94
CM015574.1_RaGOO	750000	45724411	0	0	0.0000	34	36	0.94	0.96	0.94
CM015574.1_RaGOO	800000	45724411	4	0	0.0000	39	41	1.10	1.10	0.96
CM015574.1_RaGOO	850000	45724411	3	0	0.0000	32	34	0.89	0.92	0.93
CM015574.1_RaGOO	900000	45724411	1	4	0.0000	34	36	0.95	0.96	0.95
CM015574.1_RaGOO	950000	45724411	9	8	0.0093	33	34	0.91	0.91	0.96
CM015574.1_RaGOO	1000000	45724411	3	6	0.0041	36	36	1.00	0.96	1.00
CM015574.1_RaGOO	1050000	45724411	3	1	0.0000	30	34	0.84	0.91	0.88
CM015574.1_RaGOO	1100000	45724411	1	1	0.0000	35	36	0.97	0.96	0.98
CM015574.1_RaGOO	1150000	45724411	0	4	0.0000	33	35	0.92	0.93	0.95
CM015574.1_RaGOO	1200000	45724411	0	0	0.0000	33	34	0.92	0.91	0.98
CM015574.1_RaGOO	1250000	45724411	1	2	0.0000	33	36	0.93	0.95	0.93
CM015574.1_RaGOO	1300000	45724411	0	3	0.0000	33	34	0.91	0.92	0.95
CM015574.1_RaGOO	1350000	45724411	2	3	0.0000	30	32	0.84	0.86	0.93
CM015574.1_RaGOO	1400000	45724411	0	1	0.0000	32	33	0.88	0.89	0.95
CM015574.1_RaGOO	1450000	45724411	3	24	0.0057	31	33	0.87	0.89	0.93
CM015574.1_RaGOO	1500000	45724411	0	2	0.0000	34	35	0.95	0.95	0.97
CM015574.1_RaGOO	1550000	45724411	1	7	0.0004	32	33	0.88	0.89	0.95
CM015574.1_RaGOO	1600000	45724411	0	20	0.0032	34	36	0.93	0.95	0.94
CM015574.1_RaGOO	1650000	45724411	0	8	0.0000	32	34	0.90	0.91	0.95
CM015574.1_RaGOO	1700000	45724411	1	0	0.0000	33	35	0.91	0.95	0.92
CM015574.1_RaGOO	1750000	45724411	4	0	0.0000	34	35	0.94	0.93	0.97
CM015574.1_RaGOO	1800000	45724411	1	1	0.0000	36	36	0.99	0.96	0.99
CM015574.1_RaGOO	1850000	45724411	1	0	0.0000	38	39	1.06	1.03	0.99
CM015574.1_RaGOO	1900000	45724411	1	0	0.0000	34	35	0.96	0.94	0.99
CM015574.1_RaGOO	1950000	45724411	0	3	0.0000	33	34	0.91	0.92	0.96
CM015574.1_RaGOO	2000000	45724411	0	1	0.0000	35	36	0.97	0.97	0.97
CM015574.1_RaGOO	2050000	45724411	1	2	0.0000	34	36	0.96	0.97	0.95
CM015574.1_RaGOO	2100000	45724411	10	3	0.0000	35	36	0.99	0.97	0.98
CM015574.1_RaGOO	2150000	45724411	3	0	0.0000	37	39	1.04	1.06	0.94
CM015574.1_RaGOO	2200000	45724411	1	9	0.0000	37	37	1.02	0.99	0.99
CM015574.1_RaGOO	2250000	45724411	0	0	0.0000	36	38	1.00	1.03	0.94
CM015574.1_RaGOO	2300000	45724411	0	0	0.0000	36	38	1.01	1.01	0.96
CM015574.1_RaGOO	2350000	45724411	6	1	0.0000	32	34	0.89	0.90	0.95
CM015574.1_RaGOO	2400000	45724411	6	1	0.0093	32	33	0.89	0.89	0.96
CM015574.1_RaGOO	2450000	45724411	1	2	0.0000	34	37	0.96	0.98	0.94
CM015574.1_RaGOO	2500000	45724411	0	0	0.0000	33	34	0.92	0.91	0.97
CM015574.1_RaGOO	2550000	45724411	8	0	0.0000	36	38	1.01	1.00	0.97
CM015574.1_RaGOO	2600000	45724411	1	0	0.0002	36	38	0.99	1.02	0.94
CM015574.1_RaGOO	2650000	45724411	6	0	0.0029	38	38	1.06	1.03	0.99
CM015574.1_RaGOO	2700000	45724411	4	2	0.0188	36	37	1.01	0.98	0.99
CM015574.1_RaGOO	2750000	45724411	20	1	0.0380	34	35	0.95	0.93	0.98
CM015574.1_RaGOO	2800000	45724411	2	1	0.0000	37	37	1.03	0.99	1.00
CM015574.1_RaGOO	2850000	45724411	3	0	0.0015	35	38	0.98	1.00	0.94
CM015574.1_RaGOO	2900000	45724411	0	1	0.0000	33	35	0.92	0.93	0.95
CM015574.1_RaGOO	2950000	45724411	0	0	0.0000	21	20	0.58	0.53	1.05
CM015574.1_RaGOO	3000000	45724411	2	0	0.0000	33	33	0.92	0.88	1.00
CM015574.1_RaGOO	3050000	45724411	2	1	0.0000	37	39	1.02	1.04	0.95
CM015574.1_RaGOO	3100000	45724411	20	1	0.0000	38	39	1.05	1.05	0.97
CM015574.1_RaGOO	3150000	45724411	8	3	0.0033	35	38	0.99	1.02	0.93
CM015574.1_RaGOO	3200000	45724411	2	0	0.0000	36	37	1.01	0.99	0.98
CM015574.1_RaGOO	3250000	45724411	1	1	0.0000	34	35	0.94	0.93	0.97
CM015574.1_RaGOO	3300000	45724411	3	1	0.0000	33	35	0.92	0.92	0.96
CM015574.1_RaGOO	3350000	45724411	2	5	0.0000	36	37	1.02	1.00	0.97
CM015574.1_RaGOO	3400000	45724411	0	1	0.0000	35	38	0.98	1.01	0.93
CM015574.1_RaGOO	3450000	45724411	0	0	0.0000	36	38	1.01	1.03	0.95
CM015574.1_RaGOO	3500000	45724411	0	8	0.0270	37	37	1.02	1.00	0.98
CM015574.1_RaGOO	3550000	45724411	0	7	0.0115	41	42	1.13	1.12	0.97
CM015574.1_RaGOO	3600000	45724411	2	14	0.0132	34	35	0.96	0.95	0.97
CM015574.1_RaGOO	3650000	45724411	1	1	0.0003	34	34	0.95	0.92	0.99
CM015574.1_RaGOO	3700000	45724411	0	4	0.0139	36	38	1.02	1.01	0.96
CM015574.1_RaGOO	3750000	45724411	2	5	0.0000	38	37	1.05	1.00	1.01
CM015574.1_RaGOO	3800000	45724411	1	4	0.0000	37	38	1.03	1.01	0.97
CM015574.1_RaGOO	3850000	45724411	2	4	0.0000	35	37	0.99	0.98	0.97
CM015574.1_RaGOO	3900000	45724411	1	0	0.0000	36	37	1.01	0.99	0.98
CM015574.1_RaGOO	3950000	45724411	10	0	0.0000	25	26	0.71	0.71	0.96
CM015574.1_RaGOO	4000000	45724411	4	0	0.0000	11	11	0.31	0.30	0.99
CM015574.1_RaGOO	4050000	45724411	2	1	0.0000	38	40	1.06	1.06	0.96
CM015574.1_RaGOO	4100000	45724411	33	0	0.0000	39	40	1.09	1.06	0.99
CM015574.1_RaGOO	4150000	45724411	25	0	0.0000	39	40	1.09	1.08	0.97
CM015574.1_RaGOO	4200000	45724411	1	0	0.0000	40	42	1.11	1.12	0.95
CM015574.1_RaGOO	4250000	45724411	3	0	0.0000	39	40	1.09	1.06	0.99
CM015574.1_RaGOO	4300000	45724411	29	0	0.0161	35	37	0.98	0.99	0.95
CM015574.1_RaGOO	4350000	45724411	2	0	0.0000	40	41	1.11	1.09	0.98
CM015574.1_RaGOO	4400000	45724411	9	3	0.0000	36	37	1.00	1.00	0.97
CM015574.1_RaGOO	4450000	45724411	28	0	0.0046	39	40	1.09	1.08	0.97
CM015574.1_RaGOO	4500000	45724411	1	0	0.0000	38	40	1.05	1.06	0.95
CM015574.1_RaGOO	4550000	45724411	9	0	0.0071	36	36	0.99	0.96	0.99
CM015574.1_RaGOO	4600000	45724411	3	0	0.0000	36	38	1.00	1.02	0.95
CM015574.1_RaGOO	4650000	45724411	0	3	0.0013	38	38	1.06	1.03	0.99
CM015574.1_RaGOO	4700000	45724411	0	2	0.0022	41	42	1.13	1.13	0.96
CM015574.1_RaGOO	4750000	45724411	0	1	0.0000	36	36	1.02	0.97	1.00
CM015574.1_RaGOO	4800000	45724411	0	1	0.0000	38	38	1.07	1.03	1.00
CM015574.1_RaGOO	4850000	45724411	0	2	0.0000	58	55	1.62	1.47	1.06
CM015574.1_RaGOO	4900000	45724411	0	0	0.0000	45	36	1.26	0.96	1.26
CM015574.1_RaGOO	4950000	45724411	0	0	0.0000	0	0	0.00	0.00	2.03
CM015574.1_RaGOO	5000000	45724411	0	0	0.0000	27	29	0.77	0.78	0.95
CM015574.1_RaGOO	5050000	45724411	0	0	0.0000	36	39	1.01	1.03	0.94
CM015574.1_RaGOO	5100000	45724411	0	0	0.0000	38	39	1.07	1.05	0.98
CM015574.1_RaGOO	5150000	45724411	1	0	0.0000	35	36	0.99	0.97	0.98
CM015574.1_RaGOO	5200000	45724411	0	0	0.0000	37	38	1.02	1.03	0.96
CM015574.1_RaGOO	5250000	45724411	0	0	0.0000	35	36	0.98	0.97	0.97
CM015574.1_RaGOO	5300000	45724411	0	0	0.0000	31	33	0.85	0.89	0.92
CM015574.1_RaGOO	5350000	45724411	0	1	0.0000	39	41	1.07	1.10	0.94
CM015574.1_RaGOO	5400000	45724411	0	4	0.0000	29	32	0.82	0.85	0.93
CM015574.1_RaGOO	5450000	45724411	2	2	0.0000	33	35	0.93	0.93	0.96
CM015574.1_RaGOO	5500000	45724411	0	14	0.0000	31	33	0.85	0.89	0.93
CM015574.1_RaGOO	5550000	45724411	14	1	0.0000	34	35	0.94	0.95	0.95
CM015574.1_RaGOO	5600000	45724411	0	0	0.0000	34	36	0.94	0.97	0.93
CM015574.1_RaGOO	5650000	45724411	1	1	0.0000	37	37	1.02	1.00	0.98
CM015574.1_RaGOO	5700000	45724411	0	0	0.0000	37	39	1.04	1.05	0.96
CM015574.1_RaGOO	5750000	45724411	5	0	0.0000	35	36	0.97	0.97	0.97
CM015574.1_RaGOO	5800000	45724411	0	0	0.0000	34	37	0.95	1.00	0.91
CM015574.1_RaGOO	5850000	45724411	0	0	0.0000	33	35	0.92	0.95	0.93
CM015574.1_RaGOO	5900000	45724411	0	0	0.0000	31	32	0.85	0.86	0.95
CM015574.1_RaGOO	5950000	45724411	0	1	0.0000	39	39	1.07	1.05	0.99
CM015574.1_RaGOO	6000000	45724411	0	0	0.0000	38	39	1.07	1.05	0.97
CM015574.1_RaGOO	6050000	45724411	0	6	0.0000	38	40	1.07	1.07	0.96
CM015574.1_RaGOO	6100000	45724411	0	0	0.0000	39	40	1.10	1.08	0.98
CM015574.1_RaGOO	6150000	45724411	1	0	0.0000	31	34	0.87	0.92	0.92
CM015574.1_RaGOO	6200000	45724411	0	0	0.0000	37	39	1.02	1.04	0.94
CM015574.1_RaGOO	6250000	45724411	0	0	0.0000	32	34	0.90	0.92	0.93
CM015574.1_RaGOO	6300000	45724411	0	0	0.0000	32	34	0.90	0.92	0.94
CM015574.1_RaGOO	6350000	45724411	0	0	0.0000	39	41	1.10	1.09	0.97
CM015574.1_RaGOO	6400000	45724411	0	1	0.0000	35	37	0.97	1.00	0.93
CM015574.1_RaGOO	6450000	45724411	0	0	0.0000	35	38	0.98	1.00	0.94
CM015574.1_RaGOO	6500000	45724411	0	0	0.0000	33	35	0.92	0.93	0.96
CM015574.1_RaGOO	6550000	45724411	0	0	0.0000	36	37	0.99	0.99	0.96
CM015574.1_RaGOO	6600000	45724411	0	0	0.0000	32	35	0.88	0.93	0.92
CM015574.1_RaGOO	6650000	45724411	0	3	0.0000	42	46	1.18	1.24	0.91
CM015574.1_RaGOO	6700000	45724411	0	0	0.0000	32	34	0.89	0.90	0.95
CM015574.1_RaGOO	6750000	45724411	0	0	0.0000	29	31	0.82	0.83	0.94
CM015574.1_RaGOO	6800000	45724411	0	1	0.0000	35	36	0.98	0.97	0.97
CM015574.1_RaGOO	6850000	45724411	0	0	0.0000	40	41	1.10	1.09	0.97
CM015574.1_RaGOO	6900000	45724411	0	0	0.0000	38	38	1.05	1.02	0.98
CM015574.1_RaGOO	6950000	45724411	1	2	0.0000	68	68	1.89	1.83	0.99
CM015574.1_RaGOO	7000000	45724411	1	2	0.0000	121	127	3.36	3.40	0.95
CM015574.1_RaGOO	7050000	45724411	0	0	0.0000	39	41	1.09	1.10	0.96
CM015574.1_RaGOO	7100000	45724411	2	1	0.0014	42	42	1.17	1.11	1.01
CM015574.1_RaGOO	7150000	45724411	13	0	0.0543	27	35	0.75	0.93	0.78
CM015574.1_RaGOO	7200000	45724411	5	1	0.0102	37	40	1.02	1.07	0.92
CM015574.1_RaGOO	7250000	45724411	1	0	0.0000	42	43	1.17	1.16	0.97
CM015574.1_RaGOO	7300000	45724411	4	0	0.0000	36	35	1.00	0.94	1.02
CM015574.1_RaGOO	7350000	45724411	0	0	0.0000	72	70	2.01	1.88	1.02
CM015574.1_RaGOO	7400000	45724411	0	0	0.0000	38	39	1.06	1.05	0.97
CM015574.1_RaGOO	7450000	45724411	0	0	0.0000	39	41	1.09	1.09	0.96
CM015574.1_RaGOO	7500000	45724411	1	0	0.0000	40	41	1.11	1.10	0.97
CM015574.1_RaGOO	7550000	45724411	30	0	0.0081	41	41	1.13	1.10	0.99
CM015574.1_RaGOO	7600000	45724411	10	1	0.0194	39	41	1.07	1.10	0.94
CM015574.1_RaGOO	7650000	45724411	13	3	0.0178	41	40	1.13	1.07	1.02
CM015574.1_RaGOO	7700000	45724411	0	12	0.0000	39	39	1.08	1.05	0.99
CM015574.1_RaGOO	7750000	45724411	2	0	0.0000	40	41	1.12	1.11	0.97
CM015574.1_RaGOO	7800000	45724411	3	1	0.0000	38	39	1.06	1.06	0.96
CM015574.1_RaGOO	7850000	45724411	1	1	0.0000	39	39	1.09	1.04	1.00
CM015574.1_RaGOO	7900000	45724411	3	1	0.0003	40	40	1.11	1.08	0.99
CM015574.1_RaGOO	7950000	45724411	3	1	0.0000	37	38	1.04	1.02	0.98
CM015574.1_RaGOO	8000000	45724411	0	4	0.0000	33	34	0.91	0.92	0.95
CM015574.1_RaGOO	8050000	45724411	4	0	0.0000	35	36	0.98	0.98	0.96
CM015574.1_RaGOO	8100000	45724411	1	0	0.0000	39	40	1.09	1.06	0.98
CM015574.1_RaGOO	8150000	45724411	0	4	0.0000	43	43	1.20	1.15	1.00
CM015574.1_RaGOO	8200000	45724411	0	0	0.0000	41	42	1.13	1.12	0.97
CM015574.1_RaGOO	8250000	45724411	5	0	0.0000	36	38	1.01	1.01	0.95
CM015574.1_RaGOO	8300000	45724411	2	1	0.0000	36	38	1.01	1.01	0.95
CM015574.1_RaGOO	8350000	45724411	16	0	0.0068	39	40	1.07	1.07	0.96
CM015574.1_RaGOO	8400000	45724411	0	0	0.0000	38	40	1.06	1.07	0.96
CM015574.1_RaGOO	8450000	45724411	1	0	0.0000	40	41	1.11	1.09	0.97
CM015574.1_RaGOO	8500000	45724411	0	0	0.0000	40	41	1.11	1.11	0.96
CM015574.1_RaGOO	8550000	45724411	1	0	0.0024	38	41	1.06	1.10	0.93
CM015574.1_RaGOO	8600000	45724411	0	2	0.0000	39	42	1.09	1.13	0.93
CM015574.1_RaGOO	8650000	45724411	0	0	0.0000	41	42	1.15	1.12	0.99
CM015574.1_RaGOO	8700000	45724411	0	1	0.0000	39	39	1.08	1.05	0.98
CM015574.1_RaGOO	8750000	45724411	0	3	0.0030	41	42	1.14	1.13	0.96
CM015574.1_RaGOO	8800000	45724411	0	0	0.0000	40	42	1.11	1.13	0.95
CM015574.1_RaGOO	8850000	45724411	2	0	0.0047	36	38	1.00	1.02	0.95
CM015574.1_RaGOO	8900000	45724411	6	2	0.0018	41	42	1.15	1.12	0.99
CM015574.1_RaGOO	8950000	45724411	0	6	0.0032	38	40	1.05	1.06	0.96
CM015574.1_RaGOO	9000000	45724411	0	9	0.0000	39	39	1.07	1.05	0.98
CM015574.1_RaGOO	9050000	45724411	0	0	0.0049	39	41	1.09	1.09	0.96
CM015574.1_RaGOO	9100000	45724411	2	0	0.0000	38	39	1.05	1.05	0.96
CM015574.1_RaGOO	9150000	45724411	2	1	0.0000	33	35	0.91	0.93	0.94
CM015574.1_RaGOO	9200000	45724411	11	0	0.0000	38	40	1.05	1.08	0.93
CM015574.1_RaGOO	9250000	45724411	0	1	0.0000	36	38	1.00	1.02	0.93
CM015574.1_RaGOO	9300000	45724411	0	0	0.0000	32	35	0.89	0.94	0.91
CM015574.1_RaGOO	9350000	45724411	0	0	0.0000	39	42	1.09	1.11	0.94
CM015574.1_RaGOO	9400000	45724411	4	0	0.0000	32	36	0.90	0.96	0.91
CM015574.1_RaGOO	9450000	45724411	0	2	0.0000	36	37	0.99	0.99	0.96
CM015574.1_RaGOO	9500000	45724411	7	1	0.0000	36	41	1.01	1.10	0.88
CM015574.1_RaGOO	9550000	45724411	0	0	0.0000	39	47	1.09	1.25	0.84
CM015574.1_RaGOO	9600000	45724411	2	1	0.0000	32	39	0.89	1.04	0.82
CM015574.1_RaGOO	9650000	45724411	2	0	0.0000	29	34	0.81	0.90	0.87
CM015574.1_RaGOO	9700000	45724411	8	0	0.0004	32	35	0.90	0.95	0.91
CM015574.1_RaGOO	9750000	45724411	0	0	0.0024	40	42	1.13	1.13	0.96
CM015574.1_RaGOO	9800000	45724411	1	3	0.0000	42	42	1.17	1.14	0.99
CM015574.1_RaGOO	9850000	45724411	1	3	0.0000	39	39	1.08	1.05	0.99
CM015574.1_RaGOO	9900000	45724411	4	1	0.0000	39	40	1.08	1.06	0.98
CM015574.1_RaGOO	9950000	45724411	3	0	0.0000	36	38	1.01	1.03	0.95
CM015574.1_RaGOO	10000000	45724411	0	0	0.0000	38	40	1.07	1.08	0.95
CM015574.1_RaGOO	10050000	45724411	1	1	0.0000	38	39	1.07	1.05	0.98
CM015574.1_RaGOO	10100000	45724411	1	3	0.0000	39	41	1.09	1.09	0.96
CM015574.1_RaGOO	10150000	45724411	1	0	0.0000	40	41	1.13	1.10	0.99
CM015574.1_RaGOO	10200000	45724411	1	4	0.0000	38	39	1.06	1.04	0.98
CM015574.1_RaGOO	10250000	45724411	0	0	0.0000	38	39	1.06	1.05	0.97
CM015574.1_RaGOO	10300000	45724411	8	4	0.0000	39	41	1.09	1.09	0.96
CM015574.1_RaGOO	10350000	45724411	2	0	0.0000	32	35	0.90	0.93	0.93
CM015574.1_RaGOO	10400000	45724411	0	0	0.0000	31	32	0.85	0.86	0.96
CM015574.1_RaGOO	10450000	45724411	0	0	0.0000	35	37	0.97	0.98	0.95
CM015574.1_RaGOO	10500000	45724411	1	3	0.0000	28	32	0.79	0.85	0.89
CM015574.1_RaGOO	10550000	45724411	1	0	0.0000	37	38	1.03	1.01	0.98
CM015574.1_RaGOO	10600000	45724411	0	1	0.0127	42	44	1.18	1.17	0.97
CM015574.1_RaGOO	10650000	45724411	0	0	0.0000	36	38	1.01	1.02	0.95
CM015574.1_RaGOO	10700000	45724411	0	5	0.0351	37	39	1.03	1.03	0.96
CM015574.1_RaGOO	10750000	45724411	0	4	0.0000	38	39	1.06	1.05	0.97
CM015574.1_RaGOO	10800000	45724411	0	0	0.0000	38	40	1.05	1.06	0.95
CM015574.1_RaGOO	10850000	45724411	0	8	0.0000	37	38	1.04	1.03	0.97
CM015574.1_RaGOO	10900000	45724411	1	2	0.0000	36	37	1.00	0.99	0.98
CM015574.1_RaGOO	10950000	45724411	0	0	0.0000	35	38	0.98	1.01	0.94
CM015574.1_RaGOO	11000000	45724411	0	0	0.0000	36	37	1.01	1.00	0.97
CM015574.1_RaGOO	11050000	45724411	0	3	0.0000	37	39	1.04	1.03	0.97
CM015574.1_RaGOO	11100000	45724411	3	2	0.0000	36	37	0.99	0.99	0.96
CM015574.1_RaGOO	11150000	45724411	0	0	0.0000	38	39	1.07	1.06	0.97
CM015574.1_RaGOO	11200000	45724411	0	1	0.0000	36	37	1.01	0.99	0.98
CM015574.1_RaGOO	11250000	45724411	1	0	0.0000	38	40	1.05	1.08	0.94
CM015574.1_RaGOO	11300000	45724411	1	0	0.0000	43	45	1.20	1.19	0.96
CM015574.1_RaGOO	11350000	45724411	0	1	0.0000	37	39	1.03	1.03	0.96
CM015574.1_RaGOO	11400000	45724411	14	2	0.0000	27	31	0.76	0.82	0.89
CM015574.1_RaGOO	11450000	45724411	1	1	0.0000	33	35	0.93	0.94	0.95
CM015574.1_RaGOO	11500000	45724411	2	0	0.0000	39	42	1.09	1.11	0.94
CM015574.1_RaGOO	11550000	45724411	0	0	0.0000	39	40	1.09	1.07	0.98
CM015574.1_RaGOO	11600000	45724411	0	0	0.0000	41	41	1.13	1.10	0.99
CM015574.1_RaGOO	11650000	45724411	1	1	0.0000	38	40	1.06	1.08	0.95
CM015574.1_RaGOO	11700000	45724411	0	0	0.0000	38	39	1.06	1.04	0.98
CM015574.1_RaGOO	11750000	45724411	0	0	0.0000	43	43	1.20	1.14	1.01
CM015574.1_RaGOO	11800000	45724411	0	0	0.0000	43	44	1.20	1.17	0.99
CM015574.1_RaGOO	11850000	45724411	0	0	0.0000	41	43	1.14	1.15	0.95
CM015574.1_RaGOO	11900000	45724411	2	2	0.0000	40	42	1.12	1.13	0.96
CM015574.1_RaGOO	11950000	45724411	1	0	0.0000	40	42	1.13	1.13	0.96
CM015574.1_RaGOO	12000000	45724411	1	1	0.0000	40	40	1.12	1.08	1.00
CM015574.1_RaGOO	12050000	45724411	0	0	0.0000	37	39	1.03	1.05	0.94
CM015574.1_RaGOO	12100000	45724411	0	1	0.0000	34	35	0.95	0.93	0.98
CM015574.1_RaGOO	12150000	45724411	0	0	0.0000	36	38	1.01	1.02	0.96
CM015574.1_RaGOO	12200000	45724411	0	4	0.0000	38	40	1.06	1.06	0.96
CM015574.1_RaGOO	12250000	45724411	0	0	0.0000	38	40	1.07	1.07	0.96
CM015574.1_RaGOO	12300000	45724411	7	0	0.0000	40	40	1.11	1.07	1.00
CM015574.1_RaGOO	12350000	45724411	0	0	0.0000	38	38	1.05	1.02	0.99
CM015574.1_RaGOO	12400000	45724411	0	1	0.0000	42	43	1.18	1.15	0.99
CM015574.1_RaGOO	12450000	45724411	1	2	0.0000	37	39	1.04	1.05	0.95
CM015574.1_RaGOO	12500000	45724411	1	0	0.0000	40	41	1.11	1.09	0.98
CM015574.1_RaGOO	12550000	45724411	0	0	0.0000	39	39	1.08	1.06	0.98
CM015574.1_RaGOO	12600000	45724411	1	0	0.0000	42	42	1.16	1.13	0.98
CM015574.1_RaGOO	12650000	45724411	0	0	0.0000	37	39	1.04	1.05	0.95
CM015574.1_RaGOO	12700000	45724411	1	2	0.0000	35	37	0.98	0.98	0.96
CM015574.1_RaGOO	12750000	45724411	0	5	0.0000	37	39	1.02	1.04	0.94
CM015574.1_RaGOO	12800000	45724411	8	4	0.0000	33	33	0.91	0.87	1.00
CM015574.1_RaGOO	12850000	45724411	2	1	0.0000	38	40	1.07	1.07	0.97
CM015574.1_RaGOO	12900000	45724411	2	0	0.0000	37	37	1.03	1.00	0.99
CM015574.1_RaGOO	12950000	45724411	0	0	0.0000	34	35	0.96	0.94	0.98
CM015574.1_RaGOO	13000000	45724411	1	1	0.0000	35	36	0.98	0.97	0.96
CM015574.1_RaGOO	13050000	45724411	0	4	0.0095	34	36	0.94	0.95	0.95
CM015574.1_RaGOO	13100000	45724411	0	2	0.0047	33	35	0.93	0.95	0.94
CM015574.1_RaGOO	13150000	45724411	1	31	0.0000	34	35	0.93	0.95	0.95
CM015574.1_RaGOO	13200000	45724411	6	0	0.0000	35	36	0.96	0.95	0.97
CM015574.1_RaGOO	13250000	45724411	2	0	0.0064	33	35	0.93	0.95	0.94
CM015574.1_RaGOO	13300000	45724411	0	4	0.0000	35	36	0.97	0.96	0.97
CM015574.1_RaGOO	13350000	45724411	0	0	0.0139	33	35	0.93	0.95	0.95
CM015574.1_RaGOO	13400000	45724411	0	1	0.0000	32	34	0.89	0.91	0.94
CM015574.1_RaGOO	13450000	45724411	0	0	0.0000	34	36	0.94	0.97	0.93
CM015574.1_RaGOO	13500000	45724411	0	20	0.0157	33	35	0.93	0.94	0.95
CM015574.1_RaGOO	13550000	45724411	1	0	0.0000	32	30	0.90	0.80	1.08
CM015574.1_RaGOO	13600000	45724411	2	0	0.0000	41	41	1.13	1.10	0.99
CM015574.1_RaGOO	13650000	45724411	0	0	0.0000	34	36	0.94	0.96	0.94
CM015574.1_RaGOO	13700000	45724411	0	0	0.0000	34	37	0.95	1.00	0.92
CM015574.1_RaGOO	13750000	45724411	0	2	0.0005	34	36	0.94	0.96	0.94
CM015574.1_RaGOO	13800000	45724411	3	1	0.0021	31	34	0.86	0.91	0.91
CM015574.1_RaGOO	13850000	45724411	1	4	0.0000	33	35	0.93	0.94	0.95
CM015574.1_RaGOO	13900000	45724411	4	0	0.0000	32	35	0.89	0.92	0.92
CM015574.1_RaGOO	13950000	45724411	1	2	0.0000	32	34	0.90	0.91	0.95
CM015574.1_RaGOO	14000000	45724411	0	0	0.0000	34	35	0.94	0.93	0.97
CM015574.1_RaGOO	14050000	45724411	0	0	0.0000	31	33	0.87	0.88	0.95
CM015574.1_RaGOO	14100000	45724411	0	0	0.0000	36	38	1.00	1.02	0.94
CM015574.1_RaGOO	14150000	45724411	4	0	0.0000	36	39	1.00	1.04	0.93
CM015574.1_RaGOO	14200000	45724411	0	0	0.0000	38	40	1.06	1.07	0.94
CM015574.1_RaGOO	14250000	45724411	0	1	0.0000	38	38	1.05	1.03	0.98
CM015574.1_RaGOO	14300000	45724411	0	0	0.0000	38	38	1.05	1.03	0.98
CM015574.1_RaGOO	14350000	45724411	1	5	0.0112	39	41	1.10	1.08	0.97
CM015574.1_RaGOO	14400000	45724411	0	0	0.0069	42	43	1.18	1.15	0.98
CM015574.1_RaGOO	14450000	45724411	0	0	0.0000	42	43	1.18	1.15	0.99
CM015574.1_RaGOO	14500000	45724411	0	1	0.0000	38	40	1.07	1.08	0.95
CM015574.1_RaGOO	14550000	45724411	0	3	0.0000	35	37	0.97	0.98	0.95
CM015574.1_RaGOO	14600000	45724411	0	1	0.0000	38	41	1.05	1.09	0.92
CM015574.1_RaGOO	14650000	45724411	0	0	0.0000	37	40	1.04	1.07	0.93
CM015574.1_RaGOO	14700000	45724411	0	1	0.0000	37	39	1.04	1.04	0.97
CM015574.1_RaGOO	14750000	45724411	4	2	0.0000	38	38	1.05	1.03	0.98
CM015574.1_RaGOO	14800000	45724411	0	0	0.0000	38	39	1.05	1.05	0.95
CM015574.1_RaGOO	14850000	45724411	0	1	0.0000	29	32	0.82	0.87	0.91
CM015574.1_RaGOO	14900000	45724411	0	1	0.0000	36	39	1.01	1.03	0.94
CM015574.1_RaGOO	14950000	45724411	0	0	0.0000	41	43	1.13	1.14	0.95
CM015574.1_RaGOO	15000000	45724411	1	0	0.0000	39	41	1.07	1.09	0.94
CM015574.1_RaGOO	15050000	45724411	0	0	0.0000	37	39	1.04	1.06	0.95
CM015574.1_RaGOO	15100000	45724411	0	0	0.0000	34	35	0.94	0.94	0.96
CM015574.1_RaGOO	15150000	45724411	0	1	0.0000	38	39	1.07	1.04	0.99
CM015574.1_RaGOO	15200000	45724411	2	0	0.0000	34	37	0.96	0.98	0.94
CM015574.1_RaGOO	15250000	45724411	2	0	0.0000	42	43	1.18	1.15	0.99
CM015574.1_RaGOO	15300000	45724411	0	0	0.0015	39	40	1.08	1.08	0.96
CM015574.1_RaGOO	15350000	45724411	0	1	0.0092	40	41	1.11	1.11	0.96
CM015574.1_RaGOO	15400000	45724411	0	0	0.0000	41	42	1.13	1.14	0.96
CM015574.1_RaGOO	15450000	45724411	0	0	0.0000	39	41	1.07	1.09	0.94
CM015574.1_RaGOO	15500000	45724411	2	0	0.0000	42	43	1.16	1.15	0.97
CM015574.1_RaGOO	15550000	45724411	1	2	0.0000	38	40	1.06	1.08	0.94
CM015574.1_RaGOO	15600000	45724411	3	0	0.0000	40	40	1.12	1.08	0.99
CM015574.1_RaGOO	15650000	45724411	0	0	0.0000	38	39	1.07	1.04	0.99
CM015574.1_RaGOO	15700000	45724411	0	2	0.0000	38	38	1.05	1.02	0.99
CM015574.1_RaGOO	15750000	45724411	4	0	0.0000	39	40	1.08	1.08	0.96
CM015574.1_RaGOO	15800000	45724411	0	0	0.0000	38	40	1.07	1.06	0.97
CM015574.1_RaGOO	15850000	45724411	0	1	0.0000	38	38	1.07	1.03	1.00
CM015574.1_RaGOO	15900000	45724411	0	0	0.0000	40	41	1.11	1.09	0.99
CM015574.1_RaGOO	15950000	45724411	1	2	0.0000	39	40	1.08	1.08	0.96
CM015574.1_RaGOO	16000000	45724411	2	0	0.0000	35	37	0.97	0.99	0.94
CM015574.1_RaGOO	16050000	45724411	1	0	0.0000	37	38	1.02	1.03	0.95
CM015574.1_RaGOO	16100000	45724411	0	0	0.0000	40	40	1.10	1.08	0.98
CM015574.1_RaGOO	16150000	45724411	1	1	0.0000	39	41	1.10	1.10	0.96
CM015574.1_RaGOO	16200000	45724411	0	1	0.0000	38	40	1.07	1.06	0.97
CM015574.1_RaGOO	16250000	45724411	0	0	0.0000	35	36	0.97	0.96	0.98
CM015574.1_RaGOO	16300000	45724411	1	6	0.0000	32	35	0.89	0.93	0.91
CM015574.1_RaGOO	16350000	45724411	0	0	0.0000	36	38	1.01	1.01	0.96
CM015574.1_RaGOO	16400000	45724411	2	0	0.0000	33	36	0.92	0.96	0.92
CM015574.1_RaGOO	16450000	45724411	1	0	0.0000	36	38	1.00	1.02	0.94
CM015574.1_RaGOO	16500000	45724411	0	3	0.0000	35	36	0.98	0.97	0.97
CM015574.1_RaGOO	16550000	45724411	0	0	0.0000	36	37	1.02	0.99	0.98
CM015574.1_RaGOO	16600000	45724411	1	0	0.0000	38	40	1.06	1.07	0.96
CM015574.1_RaGOO	16650000	45724411	0	0	0.0000	38	41	1.05	1.09	0.92
CM015574.1_RaGOO	16700000	45724411	0	0	0.0038	28	30	0.78	0.79	0.94
CM015574.1_RaGOO	16750000	45724411	8	0	0.0073	34	36	0.95	0.97	0.95
CM015574.1_RaGOO	16800000	45724411	2	0	0.0000	40	39	1.10	1.05	1.01
CM015574.1_RaGOO	16850000	45724411	2	0	0.0000	41	41	1.13	1.10	0.99
CM015574.1_RaGOO	16900000	45724411	1	0	0.0000	40	42	1.12	1.13	0.96
CM015574.1_RaGOO	16950000	45724411	1	2	0.0009	50	52	1.40	1.39	0.97
CM015574.1_RaGOO	17000000	45724411	2	2	0.0000	35	36	0.96	0.97	0.96
CM015574.1_RaGOO	17050000	45724411	0	1	0.0000	36	37	0.99	1.00	0.95
CM015574.1_RaGOO	17100000	45724411	1	0	0.0000	34	37	0.96	0.99	0.93
CM015574.1_RaGOO	17150000	45724411	2	3	0.0000	32	33	0.90	0.90	0.96
CM015574.1_RaGOO	17200000	45724411	0	1	0.0000	35	37	0.97	0.98	0.95
CM015574.1_RaGOO	17250000	45724411	1	0	0.0000	35	37	0.97	0.99	0.94
CM015574.1_RaGOO	17300000	45724411	0	1	0.0000	37	40	1.04	1.07	0.94
CM015574.1_RaGOO	17350000	45724411	1	0	0.0000	33	36	0.93	0.96	0.93
CM015574.1_RaGOO	17400000	45724411	7	0	0.0000	32	33	0.88	0.89	0.96
CM015574.1_RaGOO	17450000	45724411	0	0	0.0000	35	37	0.98	0.98	0.96
CM015574.1_RaGOO	17500000	45724411	0	2	0.0000	35	37	0.97	0.98	0.95
CM015574.1_RaGOO	17550000	45724411	0	2	0.0000	32	34	0.90	0.92	0.95
CM015574.1_RaGOO	17600000	45724411	1	0	0.0000	37	39	1.03	1.05	0.94
CM015574.1_RaGOO	17650000	45724411	0	1	0.0000	39	40	1.09	1.06	0.98
CM015574.1_RaGOO	17700000	45724411	0	0	0.0000	38	39	1.05	1.05	0.96
CM015574.1_RaGOO	17750000	45724411	1	0	0.0000	38	40	1.06	1.07	0.95
CM015574.1_RaGOO	17800000	45724411	0	0	0.0000	34	37	0.95	0.99	0.92
CM015574.1_RaGOO	17850000	45724411	1	3	0.0000	32	35	0.90	0.93	0.93
CM015574.1_RaGOO	17900000	45724411	4	0	0.0000	34	36	0.94	0.96	0.95
CM015574.1_RaGOO	17950000	45724411	0	1	0.0000	33	36	0.93	0.97	0.92
CM015574.1_RaGOO	18000000	45724411	0	3	0.0000	37	38	1.03	1.01	0.99
CM015574.1_RaGOO	18050000	45724411	0	1	0.0000	37	38	1.04	1.02	0.98
CM015574.1_RaGOO	18100000	45724411	0	4	0.0000	37	39	1.04	1.04	0.97
CM015574.1_RaGOO	18150000	45724411	0	3	0.0000	33	36	0.91	0.96	0.91
CM015574.1_RaGOO	18200000	45724411	0	0	0.0000	38	39	1.05	1.05	0.96
CM015574.1_RaGOO	18250000	45724411	0	5	0.0000	38	39	1.07	1.03	1.00
CM015574.1_RaGOO	18300000	45724411	2	3	0.0007	38	39	1.07	1.05	0.98
CM015574.1_RaGOO	18350000	45724411	3	0	0.0000	38	39	1.04	1.04	0.97
CM015574.1_RaGOO	18400000	45724411	1	0	0.0000	39	40	1.10	1.07	0.99
CM015574.1_RaGOO	18450000	45724411	5	0	0.0000	38	38	1.07	1.01	1.01
CM015574.1_RaGOO	18500000	45724411	3	2	0.0000	36	37	1.00	0.98	0.98
CM015574.1_RaGOO	18550000	45724411	0	0	0.0000	38	39	1.05	1.03	0.98
CM015574.1_RaGOO	18600000	45724411	0	0	0.0000	36	37	0.99	0.98	0.97
CM015574.1_RaGOO	18650000	45724411	0	0	0.0000	37	38	1.03	1.02	0.97
CM015574.1_RaGOO	18700000	45724411	0	0	0.0000	38	40	1.07	1.06	0.97
CM015574.1_RaGOO	18750000	45724411	0	0	0.0000	33	34	0.91	0.90	0.97
CM015574.1_RaGOO	18800000	45724411	0	1	0.0000	34	37	0.95	0.98	0.93
CM015574.1_RaGOO	18850000	45724411	0	0	0.0000	36	37	1.00	0.99	0.97
CM015574.1_RaGOO	18900000	45724411	0	0	0.0000	38	41	1.07	1.09	0.94
CM015574.1_RaGOO	18950000	45724411	0	0	0.0000	34	36	0.96	0.97	0.95
CM015574.1_RaGOO	19000000	45724411	1	0	0.0000	37	39	1.04	1.06	0.95
CM015574.1_RaGOO	19050000	45724411	0	0	0.0000	39	41	1.07	1.09	0.94
CM015574.1_RaGOO	19100000	45724411	1	0	0.0000	36	39	1.01	1.04	0.93
CM015574.1_RaGOO	19150000	45724411	1	0	0.0024	35	37	0.97	0.99	0.94
CM015574.1_RaGOO	19200000	45724411	1	0	0.0000	33	35	0.93	0.95	0.94
CM015574.1_RaGOO	19250000	45724411	0	1	0.0000	35	36	0.97	0.97	0.97
CM015574.1_RaGOO	19300000	45724411	0	4	0.0000	36	37	1.00	0.99	0.96
CM015574.1_RaGOO	19350000	45724411	1	2	0.0000	38	39	1.06	1.03	0.98
CM015574.1_RaGOO	19400000	45724411	2	0	0.0000	36	38	1.01	1.01	0.97
CM015574.1_RaGOO	19450000	45724411	2	0	0.0016	32	33	0.90	0.90	0.96
CM015574.1_RaGOO	19500000	45724411	0	0	0.0030	37	36	1.03	0.97	1.01
CM015574.1_RaGOO	19550000	45724411	6	0	0.0000	38	38	1.05	1.02	0.98
CM015574.1_RaGOO	19600000	45724411	11	0	0.0000	32	34	0.89	0.90	0.95
CM015574.1_RaGOO	19650000	45724411	1	0	0.0000	38	39	1.07	1.05	0.98
CM015574.1_RaGOO	19700000	45724411	0	0	0.0000	35	37	0.97	0.99	0.94
CM015574.1_RaGOO	19750000	45724411	0	1	0.0000	37	39	1.03	1.05	0.94
CM015574.1_RaGOO	19800000	45724411	0	0	0.0000	37	38	1.04	1.02	0.98
CM015574.1_RaGOO	19850000	45724411	0	0	0.0000	34	36	0.96	0.98	0.94
CM015574.1_RaGOO	19900000	45724411	1	5	0.0000	33	36	0.92	0.97	0.91
CM015574.1_RaGOO	19950000	45724411	7	0	0.0000	29	32	0.79	0.85	0.90
CM015574.1_RaGOO	20000000	45724411	0	0	0.0000	35	37	0.97	0.98	0.94
CM015574.1_RaGOO	20050000	45724411	1	1	0.0000	33	34	0.91	0.91	0.97
CM015574.1_RaGOO	20100000	45724411	0	2	0.0000	37	39	1.04	1.04	0.96
CM015574.1_RaGOO	20150000	45724411	0	0	0.0000	33	36	0.92	0.96	0.92
CM015574.1_RaGOO	20200000	45724411	0	6	0.0000	32	34	0.90	0.91	0.95
CM015574.1_RaGOO	20250000	45724411	0	1	0.0000	35	36	0.98	0.98	0.97
CM015574.1_RaGOO	20300000	45724411	4	4	0.0000	32	34	0.90	0.91	0.96
CM015574.1_RaGOO	20350000	45724411	0	1	0.0000	33	35	0.93	0.94	0.95
CM015574.1_RaGOO	20400000	45724411	1	0	0.0000	37	39	1.03	1.04	0.95
CM015574.1_RaGOO	20450000	45724411	2	0	0.0000	27	28	0.75	0.76	0.95
CM015574.1_RaGOO	20500000	45724411	2	2	0.0000	31	32	0.86	0.86	0.97
CM015574.1_RaGOO	20550000	45724411	3	0	0.0000	32	34	0.88	0.91	0.93
CM015574.1_RaGOO	20600000	45724411	0	0	0.0000	32	35	0.90	0.93	0.92
CM015574.1_RaGOO	20650000	45724411	0	0	0.0000	36	38	1.00	1.01	0.95
CM015574.1_RaGOO	20700000	45724411	0	0	0.0000	37	38	1.03	1.01	0.98
CM015574.1_RaGOO	20750000	45724411	0	0	0.0000	35	36	0.97	0.96	0.97
CM015574.1_RaGOO	20800000	45724411	0	2	0.0000	31	33	0.86	0.88	0.94
CM015574.1_RaGOO	20850000	45724411	0	5	0.0000	29	32	0.82	0.86	0.92
CM015574.1_RaGOO	20900000	45724411	0	0	0.0000	29	33	0.81	0.89	0.87
CM015574.1_RaGOO	20950000	45724411	0	0	0.0000	31	33	0.85	0.87	0.94
CM015574.1_RaGOO	21000000	45724411	0	1	0.0000	34	36	0.94	0.95	0.95
CM015574.1_RaGOO	21050000	45724411	0	0	0.0000	34	37	0.95	0.98	0.93
CM015574.1_RaGOO	21100000	45724411	11	3	0.0034	34	35	0.95	0.95	0.97
CM015574.1_RaGOO	21150000	45724411	3	0	0.0000	32	34	0.90	0.91	0.95
CM015574.1_RaGOO	21200000	45724411	0	0	0.0000	40	39	1.11	1.06	1.01
CM015574.1_RaGOO	21250000	45724411	1	0	0.0000	34	36	0.94	0.96	0.94
CM015574.1_RaGOO	21300000	45724411	0	0	0.0000	29	33	0.82	0.88	0.89
CM015574.1_RaGOO	21350000	45724411	0	0	0.0000	33	35	0.93	0.95	0.94
CM015574.1_RaGOO	21400000	45724411	0	0	0.0000	35	35	0.97	0.95	0.98
CM015574.1_RaGOO	21450000	45724411	0	6	0.0000	33	36	0.92	0.95	0.92
CM015574.1_RaGOO	21500000	45724411	0	0	0.0000	33	35	0.91	0.94	0.93
CM015574.1_RaGOO	21550000	45724411	0	0	0.0000	35	35	0.97	0.95	0.98
CM015574.1_RaGOO	21600000	45724411	1	0	0.0000	38	39	1.07	1.04	0.99
CM015574.1_RaGOO	21650000	45724411	1	1	0.0000	38	39	1.06	1.04	0.99
CM015574.1_RaGOO	21700000	45724411	1	0	0.0000	40	41	1.11	1.10	0.96
CM015574.1_RaGOO	21750000	45724411	0	0	0.0000	40	40	1.10	1.07	0.99
CM015574.1_RaGOO	21800000	45724411	1	0	0.0000	38	40	1.06	1.08	0.95
CM015574.1_RaGOO	21850000	45724411	4	0	0.0000	36	37	1.00	0.99	0.97
CM015574.1_RaGOO	21900000	45724411	1	1	0.0032	32	33	0.90	0.89	0.97
CM015574.1_RaGOO	21950000	45724411	3	2	0.0000	28	31	0.79	0.82	0.92
CM015574.1_RaGOO	22000000	45724411	3	0	0.0000	23	22	0.63	0.59	1.03
CM015574.1_RaGOO	22050000	45724411	10	1	0.0000	22	21	0.61	0.55	1.07
CM015574.1_RaGOO	22100000	45724411	1	0	0.0000	37	39	1.03	1.04	0.95
CM015574.1_RaGOO	22150000	45724411	2	0	0.0000	33	35	0.91	0.92	0.94
CM015574.1_RaGOO	22200000	45724411	1	0	0.0215	36	38	1.00	1.02	0.95
CM015574.1_RaGOO	22250000	45724411	6	0	0.0000	35	37	0.97	0.98	0.95
CM015574.1_RaGOO	22300000	45724411	0	2	0.0000	40	40	1.10	1.08	0.98
CM015574.1_RaGOO	22350000	45724411	5	1	0.0000	35	37	0.98	1.00	0.94
CM015574.1_RaGOO	22400000	45724411	6	5	0.0010	35	36	0.97	0.96	0.97
CM015574.1_RaGOO	22450000	45724411	2	0	0.0065	37	39	1.03	1.05	0.95
CM015574.1_RaGOO	22500000	45724411	1	0	0.0000	35	37	0.96	0.98	0.94
CM015574.1_RaGOO	22550000	45724411	0	0	0.0000	34	36	0.94	0.96	0.94
CM015574.1_RaGOO	22600000	45724411	0	0	0.0000	35	36	0.98	0.97	0.97
CM015574.1_RaGOO	22650000	45724411	3	1	0.0000	36	38	0.99	1.02	0.93
CM015574.1_RaGOO	22700000	45724411	0	1	0.0000	38	39	1.07	1.05	0.98
CM015574.1_RaGOO	22750000	45724411	0	0	0.0000	34	34	0.94	0.91	0.99
CM015574.1_RaGOO	22800000	45724411	0	0	0.0000	38	40	1.05	1.06	0.94
CM015574.1_RaGOO	22850000	45724411	0	0	0.0000	35	36	0.97	0.96	0.97
CM015574.1_RaGOO	22900000	45724411	2	0	0.0000	34	36	0.95	0.96	0.96
CM015574.1_RaGOO	22950000	45724411	0	0	0.0000	38	39	1.05	1.05	0.96
CM015574.1_RaGOO	23000000	45724411	0	2	0.0000	36	39	1.02	1.05	0.93
CM015574.1_RaGOO	23050000	45724411	1	0	0.0000	35	36	0.96	0.96	0.96
CM015574.1_RaGOO	23100000	45724411	0	4	0.0000	35	36	0.97	0.97	0.96
CM015574.1_RaGOO	23150000	45724411	0	2	0.0000	37	38	1.02	1.01	0.97
CM015574.1_RaGOO	23200000	45724411	1	6	0.0000	35	37	0.98	0.99	0.95
CM015574.1_RaGOO	23250000	45724411	0	4	0.0000	36	36	0.99	0.97	0.98
CM015574.1_RaGOO	23300000	45724411	1	1	0.0000	31	34	0.87	0.91	0.92
CM015574.1_RaGOO	23350000	45724411	0	1	0.0000	37	37	1.03	1.00	0.99
CM015574.1_RaGOO	23400000	45724411	0	1	0.0000	37	38	1.04	1.03	0.97
CM015574.1_RaGOO	23450000	45724411	0	5	0.0000	38	41	1.06	1.10	0.93
CM015574.1_RaGOO	23500000	45724411	0	0	0.0000	36	39	1.00	1.05	0.92
CM015574.1_RaGOO	23550000	45724411	0	1	0.0000	35	37	0.97	0.98	0.95
CM015574.1_RaGOO	23600000	45724411	0	0	0.0000	31	33	0.87	0.89	0.95
CM015574.1_RaGOO	23650000	45724411	0	0	0.0000	32	34	0.89	0.92	0.94
CM015574.1_RaGOO	23700000	45724411	0	0	0.0000	33	35	0.91	0.93	0.94
CM015574.1_RaGOO	23750000	45724411	0	6	0.0000	32	35	0.91	0.93	0.93
CM015574.1_RaGOO	23800000	45724411	0	0	0.0000	35	38	0.99	1.02	0.93
CM015574.1_RaGOO	23850000	45724411	0	1	0.0000	39	40	1.09	1.08	0.96
CM015574.1_RaGOO	23900000	45724411	0	1	0.0084	34	35	0.95	0.93	0.97
CM015574.1_RaGOO	23950000	45724411	0	0	0.0000	33	35	0.93	0.95	0.94
CM015574.1_RaGOO	24000000	45724411	0	0	0.0000	31	34	0.87	0.92	0.91
CM015574.1_RaGOO	24050000	45724411	1	1	0.0000	30	34	0.83	0.90	0.89
CM015574.1_RaGOO	24100000	45724411	0	4	0.0000	31	34	0.85	0.90	0.91
CM015574.1_RaGOO	24150000	45724411	0	0	0.0000	31	33	0.85	0.89	0.93
CM015574.1_RaGOO	24200000	45724411	1	0	0.0000	32	34	0.88	0.92	0.92
CM015574.1_RaGOO	24250000	45724411	1	1	0.0000	30	33	0.85	0.87	0.93
CM015574.1_RaGOO	24300000	45724411	2	1	0.0000	34	36	0.94	0.97	0.94
CM015574.1_RaGOO	24350000	45724411	0	0	0.0000	37	40	1.04	1.07	0.93
CM015574.1_RaGOO	24400000	45724411	2	0	0.0000	36	38	1.01	1.02	0.95
CM015574.1_RaGOO	24450000	45724411	0	0	0.0000	33	36	0.93	0.96	0.93
CM015574.1_RaGOO	24500000	45724411	4	0	0.0000	33	34	0.91	0.91	0.96
CM015574.1_RaGOO	24550000	45724411	0	0	0.0000	31	33	0.85	0.89	0.92
CM015574.1_RaGOO	24600000	45724411	1	1	0.0000	35	36	0.97	0.97	0.96
CM015574.1_RaGOO	24650000	45724411	0	0	0.0000	36	38	1.00	1.00	0.95
CM015574.1_RaGOO	24700000	45724411	1	0	0.0000	32	33	0.90	0.89	0.97
CM015574.1_RaGOO	24750000	45724411	1	3	0.0000	33	36	0.93	0.95	0.94
CM015574.1_RaGOO	24800000	45724411	0	2	0.0000	32	34	0.90	0.91	0.95
CM015574.1_RaGOO	24850000	45724411	0	0	0.0000	35	36	0.98	0.96	0.98
CM015574.1_RaGOO	24900000	45724411	6	6	0.0000	30	32	0.83	0.85	0.94
CM015574.1_RaGOO	24950000	45724411	0	0	0.0000	38	39	1.04	1.03	0.97
CM015574.1_RaGOO	25000000	45724411	0	1	0.0000	33	34	0.93	0.92	0.97
CM015574.1_RaGOO	25050000	45724411	0	6	0.0000	38	38	1.05	1.03	0.98
CM015574.1_RaGOO	25100000	45724411	0	0	0.0000	34	37	0.94	0.98	0.92
CM015574.1_RaGOO	25150000	45724411	0	11	0.0000	32	36	0.90	0.95	0.90
CM015574.1_RaGOO	25200000	45724411	0	1	0.0000	33	34	0.92	0.90	0.97
CM015574.1_RaGOO	25250000	45724411	1	0	0.0000	36	39	1.02	1.04	0.94
CM015574.1_RaGOO	25300000	45724411	2	1	0.0008	31	33	0.86	0.89	0.93
CM015574.1_RaGOO	25350000	45724411	1	1	0.0000	33	36	0.93	0.95	0.94
CM015574.1_RaGOO	25400000	45724411	2	2	0.0000	29	32	0.82	0.85	0.92
CM015574.1_RaGOO	25450000	45724411	0	4	0.0000	35	36	0.97	0.96	0.97
CM015574.1_RaGOO	25500000	45724411	0	0	0.0000	32	35	0.89	0.93	0.92
CM015574.1_RaGOO	25550000	45724411	1	1	0.0000	32	34	0.89	0.92	0.93
CM015574.1_RaGOO	25600000	45724411	0	0	0.0000	28	30	0.79	0.80	0.95
CM015574.1_RaGOO	25650000	45724411	0	0	0.0000	35	36	0.97	0.95	0.98
CM015574.1_RaGOO	25700000	45724411	0	0	0.0000	34	36	0.96	0.97	0.95
CM015574.1_RaGOO	25750000	45724411	0	0	0.0000	31	34	0.87	0.90	0.93
CM015574.1_RaGOO	25800000	45724411	1	1	0.0000	32	33	0.90	0.88	0.98
CM015574.1_RaGOO	25850000	45724411	1	0	0.0000	35	38	0.98	1.02	0.92
CM015574.1_RaGOO	25900000	45724411	0	0	0.0000	33	36	0.91	0.95	0.92
CM015574.1_RaGOO	25950000	45724411	0	0	0.0000	32	34	0.90	0.90	0.96
CM015574.1_RaGOO	26000000	45724411	0	3	0.0000	32	34	0.88	0.91	0.93
CM015574.1_RaGOO	26050000	45724411	0	7	0.0050	32	34	0.88	0.91	0.93
CM015574.1_RaGOO	26100000	45724411	2	1	0.0000	35	38	0.96	1.01	0.91
CM015574.1_RaGOO	26150000	45724411	0	12	0.0026	34	34	0.96	0.91	1.02
CM015574.1_RaGOO	26200000	45724411	0	5	0.0072	33	35	0.92	0.93	0.95
CM015574.1_RaGOO	26250000	45724411	0	3	0.0000	34	34	0.93	0.92	0.98
CM015574.1_RaGOO	26300000	45724411	0	2	0.0000	30	35	0.85	0.93	0.88
CM015574.1_RaGOO	26350000	45724411	1	5	0.0000	30	32	0.83	0.86	0.93
CM015574.1_RaGOO	26400000	45724411	0	0	0.0000	31	33	0.87	0.90	0.93
CM015574.1_RaGOO	26450000	45724411	0	1	0.0000	32	34	0.89	0.90	0.95
CM015574.1_RaGOO	26500000	45724411	0	0	0.0000	32	34	0.90	0.92	0.94
CM015574.1_RaGOO	26550000	45724411	0	0	0.0000	36	38	1.01	1.01	0.95
CM015574.1_RaGOO	26600000	45724411	2	1	0.0000	31	33	0.86	0.87	0.95
CM015574.1_RaGOO	26650000	45724411	0	1	0.0000	32	35	0.88	0.94	0.90
CM015574.1_RaGOO	26700000	45724411	0	0	0.0000	24	26	0.68	0.68	0.95
CM015574.1_RaGOO	26750000	45724411	0	1	0.0000	29	32	0.80	0.85	0.90
CM015574.1_RaGOO	26800000	45724411	0	0	0.0000	32	35	0.90	0.94	0.92
CM015574.1_RaGOO	26850000	45724411	3	0	0.0000	26	28	0.72	0.76	0.91
CM015574.1_RaGOO	26900000	45724411	1	2	0.0000	33	34	0.91	0.92	0.95
CM015574.1_RaGOO	26950000	45724411	2	0	0.0000	30	32	0.84	0.86	0.94
CM015574.1_RaGOO	27000000	45724411	3	2	0.0000	31	33	0.87	0.90	0.93
CM015574.1_RaGOO	27050000	45724411	16	3	0.0060	35	37	0.96	0.98	0.94
CM015574.1_RaGOO	27100000	45724411	1	0	0.0000	33	35	0.93	0.94	0.94
CM015574.1_RaGOO	27150000	45724411	1	0	0.0000	37	38	1.04	1.01	0.99
CM015574.1_RaGOO	27200000	45724411	1	0	0.0000	37	39	1.04	1.06	0.95
CM015574.1_RaGOO	27250000	45724411	0	3	0.0000	36	37	0.99	0.99	0.96
CM015574.1_RaGOO	27300000	45724411	0	0	0.0000	34	37	0.95	0.98	0.93
CM015574.1_RaGOO	27350000	45724411	2	0	0.0000	37	39	1.04	1.05	0.96
CM015574.1_RaGOO	27400000	45724411	0	0	0.0000	35	35	0.96	0.94	0.98
CM015574.1_RaGOO	27450000	45724411	0	4	0.0000	37	39	1.04	1.04	0.96
CM015574.1_RaGOO	27500000	45724411	1	1	0.0000	37	38	1.04	1.02	0.98
CM015574.1_RaGOO	27550000	45724411	3	1	0.0000	37	38	1.03	1.01	0.98
CM015574.1_RaGOO	27600000	45724411	0	0	0.0096	39	42	1.08	1.13	0.91
CM015574.1_RaGOO	27650000	45724411	0	5	0.0000	35	36	0.97	0.96	0.97
CM015574.1_RaGOO	27700000	45724411	1	0	0.0000	34	37	0.96	0.98	0.94
CM015574.1_RaGOO	27750000	45724411	0	2	0.0000	38	39	1.05	1.05	0.96
CM015574.1_RaGOO	27800000	45724411	1	2	0.0022	37	38	1.04	1.03	0.97
CM015574.1_RaGOO	27850000	45724411	2	0	0.0000	41	41	1.13	1.11	0.98
CM015574.1_RaGOO	27900000	45724411	0	0	0.0000	38	38	1.05	1.03	0.98
CM015574.1_RaGOO	27950000	45724411	0	0	0.0000	38	39	1.05	1.03	0.97
CM015574.1_RaGOO	28000000	45724411	0	3	0.0000	38	40	1.07	1.07	0.96
CM015574.1_RaGOO	28050000	45724411	5	2	0.0057	41	41	1.13	1.10	0.99
CM015574.1_RaGOO	28100000	45724411	0	0	0.0000	41	41	1.13	1.09	1.00
CM015574.1_RaGOO	28150000	45724411	9	1	0.0000	37	39	1.02	1.04	0.94
CM015574.1_RaGOO	28200000	45724411	0	0	0.0041	39	40	1.09	1.06	0.99
CM015574.1_RaGOO	28250000	45724411	1	0	0.0000	38	40	1.06	1.08	0.95
CM015574.1_RaGOO	28300000	45724411	1	0	0.0000	39	40	1.08	1.07	0.97
CM015574.1_RaGOO	28350000	45724411	0	0	0.0000	37	38	1.04	1.02	0.98
CM015574.1_RaGOO	28400000	45724411	3	0	0.0000	34	35	0.94	0.95	0.95
CM015574.1_RaGOO	28450000	45724411	1	0	0.0000	33	34	0.93	0.91	0.99
CM015574.1_RaGOO	28500000	45724411	0	2	0.0000	35	37	0.98	0.99	0.95
CM015574.1_RaGOO	28550000	45724411	0	6	0.0000	33	35	0.93	0.94	0.95
CM015574.1_RaGOO	28600000	45724411	2	0	0.0000	35	36	0.97	0.95	0.98
CM015574.1_RaGOO	28650000	45724411	0	0	0.0000	35	37	0.97	1.00	0.93
CM015574.1_RaGOO	28700000	45724411	0	0	0.0000	37	40	1.04	1.07	0.94
CM015574.1_RaGOO	28750000	45724411	0	1	0.0000	34	36	0.95	0.95	0.96
CM015574.1_RaGOO	28800000	45724411	0	0	0.0000	39	42	1.10	1.13	0.94
CM015574.1_RaGOO	28850000	45724411	2	0	0.0000	39	41	1.10	1.10	0.96
CM015574.1_RaGOO	28900000	45724411	0	1	0.0000	37	39	1.04	1.05	0.95
CM015574.1_RaGOO	28950000	45724411	0	0	0.0000	35	37	0.96	0.98	0.95
CM015574.1_RaGOO	29000000	45724411	0	1	0.0000	35	37	0.97	1.00	0.93
CM015574.1_RaGOO	29050000	45724411	0	0	0.0000	36	37	1.00	1.00	0.96
CM015574.1_RaGOO	29100000	45724411	2	7	0.0000	35	36	0.97	0.96	0.97
CM015574.1_RaGOO	29150000	45724411	0	2	0.0000	37	38	1.02	1.02	0.96
CM015574.1_RaGOO	29200000	45724411	0	1	0.0000	33	35	0.92	0.93	0.95
CM015574.1_RaGOO	29250000	45724411	0	0	0.0000	37	37	1.02	0.99	0.99
CM015574.1_RaGOO	29300000	45724411	3	0	0.0000	28	30	0.78	0.80	0.94
CM015574.1_RaGOO	29350000	45724411	0	1	0.0000	33	35	0.91	0.94	0.94
CM015574.1_RaGOO	29400000	45724411	0	0	0.0000	35	39	0.99	1.03	0.92
CM015574.1_RaGOO	29450000	45724411	0	3	0.0000	41	41	1.13	1.09	1.00
CM015574.1_RaGOO	29500000	45724411	0	0	0.0000	38	40	1.06	1.06	0.96
CM015574.1_RaGOO	29550000	45724411	0	0	0.0000	34	37	0.96	0.98	0.94
CM015574.1_RaGOO	29600000	45724411	0	1	0.0000	38	40	1.07	1.06	0.97
CM015574.1_RaGOO	29650000	45724411	2	1	0.0000	36	37	1.02	1.00	0.97
CM015574.1_RaGOO	29700000	45724411	0	0	0.0000	37	38	1.04	1.03	0.97
CM015574.1_RaGOO	29750000	45724411	1	1	0.0000	38	39	1.06	1.03	0.98
CM015574.1_RaGOO	29800000	45724411	0	0	0.0000	42	49	1.16	1.30	0.85
CM015574.1_RaGOO	29850000	45724411	0	1	0.0000	34	36	0.94	0.96	0.94
CM015574.1_RaGOO	29900000	45724411	0	0	0.0000	30	32	0.83	0.85	0.95
CM015574.1_RaGOO	29950000	45724411	0	0	0.0000	32	35	0.89	0.93	0.92
CM015574.1_RaGOO	30000000	45724411	0	3	0.0000	38	40	1.05	1.06	0.95
CM015574.1_RaGOO	30050000	45724411	0	3	0.0000	40	39	1.10	1.05	1.01
CM015574.1_RaGOO	30100000	45724411	0	0	0.0000	35	35	0.97	0.94	0.99
CM015574.1_RaGOO	30150000	45724411	0	0	0.0000	37	38	1.04	1.03	0.97
CM015574.1_RaGOO	30200000	45724411	0	0	0.0000	36	38	1.01	1.03	0.95
CM015574.1_RaGOO	30250000	45724411	0	0	0.0000	40	41	1.11	1.10	0.97
CM015574.1_RaGOO	30300000	45724411	0	1	0.0000	35	35	0.96	0.94	0.99
CM015574.1_RaGOO	30350000	45724411	0	0	0.0000	36	36	1.01	0.98	1.00
CM015574.1_RaGOO	30400000	45724411	0	0	0.0000	36	37	1.00	0.98	0.97
CM015574.1_RaGOO	30450000	45724411	3	2	0.0000	35	36	0.97	0.96	0.97
CM015574.1_RaGOO	30500000	45724411	1	0	0.0000	37	39	1.03	1.03	0.95
CM015574.1_RaGOO	30550000	45724411	0	0	0.0000	38	39	1.06	1.05	0.97
CM015574.1_RaGOO	30600000	45724411	0	0	0.0000	45	46	1.25	1.23	0.98
CM015574.1_RaGOO	30650000	45724411	0	0	0.0000	34	36	0.96	0.96	0.96
CM015574.1_RaGOO	30700000	45724411	0	1	0.0034	39	39	1.07	1.05	0.98
CM015574.1_RaGOO	30750000	45724411	0	2	0.0000	35	37	0.97	1.00	0.93
CM015574.1_RaGOO	30800000	45724411	1	3	0.0000	35	36	0.96	0.97	0.96
CM015574.1_RaGOO	30850000	45724411	0	0	0.0000	34	36	0.94	0.96	0.94
CM015574.1_RaGOO	30900000	45724411	0	0	0.0000	36	37	0.99	0.99	0.96
CM015574.1_RaGOO	30950000	45724411	0	0	0.0000	32	34	0.88	0.90	0.94
CM015574.1_RaGOO	31000000	45724411	0	5	0.0000	35	37	0.98	0.98	0.96
CM015574.1_RaGOO	31050000	45724411	0	1	0.0000	38	39	1.05	1.04	0.97
CM015574.1_RaGOO	31100000	45724411	0	1	0.0000	37	39	1.03	1.04	0.95
CM015574.1_RaGOO	31150000	45724411	1	2	0.0000	37	37	1.04	0.99	1.01
CM015574.1_RaGOO	31200000	45724411	1	0	0.0000	41	42	1.14	1.13	0.97
CM015574.1_RaGOO	31250000	45724411	0	1	0.0000	35	36	0.98	0.98	0.96
CM015574.1_RaGOO	31300000	45724411	4	1	0.0000	33	36	0.93	0.96	0.93
CM015574.1_RaGOO	31350000	45724411	0	0	0.0000	35	38	0.96	1.00	0.92
CM015574.1_RaGOO	31400000	45724411	0	0	0.0000	54	56	1.51	1.51	0.96
CM015574.1_RaGOO	31450000	45724411	0	1	0.0000	35	37	0.98	0.98	0.96
CM015574.1_RaGOO	31500000	45724411	0	2	0.0000	33	36	0.93	0.95	0.93
CM015574.1_RaGOO	31550000	45724411	1	0	0.0000	32	34	0.88	0.92	0.92
CM015574.1_RaGOO	31600000	45724411	0	0	0.0000	37	38	1.04	1.02	0.99
CM015574.1_RaGOO	31650000	45724411	0	0	0.0000	35	36	0.97	0.97	0.96
CM015574.1_RaGOO	31700000	45724411	1	0	0.0000	34	37	0.96	0.99	0.93
CM015574.1_RaGOO	31750000	45724411	0	0	0.0000	31	32	0.87	0.87	0.97
CM015574.1_RaGOO	31800000	45724411	0	0	0.0000	34	35	0.94	0.95	0.96
CM015574.1_RaGOO	31850000	45724411	0	1	0.0000	32	34	0.89	0.91	0.94
CM015574.1_RaGOO	31900000	45724411	0	0	0.0000	33	35	0.92	0.93	0.95
CM015574.1_RaGOO	31950000	45724411	0	0	0.0000	38	38	1.05	1.00	1.01
CM015574.1_RaGOO	32000000	45724411	0	0	0.0000	38	39	1.07	1.06	0.97
CM015574.1_RaGOO	32050000	45724411	0	0	0.0000	37	39	1.02	1.04	0.95
CM015574.1_RaGOO	32100000	45724411	0	0	0.0000	37	39	1.02	1.04	0.95
CM015574.1_RaGOO	32150000	45724411	1	0	0.0000	36	37	1.00	0.98	0.98
CM015574.1_RaGOO	32200000	45724411	0	0	0.0000	37	38	1.03	1.01	0.98
CM015574.1_RaGOO	32250000	45724411	0	0	0.0031	38	39	1.05	1.05	0.96
CM015574.1_RaGOO	32300000	45724411	1	0	0.0000	41	42	1.13	1.12	0.98
CM015574.1_RaGOO	32350000	45724411	0	0	0.0000	41	41	1.15	1.11	1.00
CM015574.1_RaGOO	32400000	45724411	0	1	0.0000	42	43	1.16	1.14	0.98
CM015574.1_RaGOO	32450000	45724411	0	4	0.0000	44	43	1.21	1.16	1.00
CM015574.1_RaGOO	32500000	45724411	1	0	0.0066	39	40	1.08	1.07	0.97
CM015574.1_RaGOO	32550000	45724411	0	2	0.0000	42	42	1.16	1.12	1.00
CM015574.1_RaGOO	32600000	45724411	0	2	0.0000	43	42	1.21	1.12	1.04
CM015574.1_RaGOO	32650000	45724411	1	1	0.0000	42	42	1.18	1.11	1.02
CM015574.1_RaGOO	32700000	45724411	4	0	0.0000	43	42	1.20	1.11	1.04
CM015574.1_RaGOO	32750000	45724411	1	1	0.0000	39	41	1.09	1.09	0.96
CM015574.1_RaGOO	32800000	45724411	0	0	0.0000	39	40	1.09	1.07	0.97
CM015574.1_RaGOO	32850000	45724411	0	1	0.0000	41	40	1.15	1.08	1.02
CM015574.1_RaGOO	32900000	45724411	0	0	0.0000	36	38	0.99	1.01	0.94
CM015574.1_RaGOO	32950000	45724411	1	0	0.0000	39	39	1.09	1.05	1.00
CM015574.1_RaGOO	33000000	45724411	0	3	0.0000	37	38	1.02	1.02	0.96
CM015574.1_RaGOO	33050000	45724411	0	0	0.0000	33	34	0.93	0.92	0.97
CM015574.1_RaGOO	33100000	45724411	0	2	0.0137	35	38	0.98	1.03	0.92
CM015574.1_RaGOO	33150000	45724411	1	0	0.0000	33	34	0.93	0.91	0.98
CM015574.1_RaGOO	33200000	45724411	0	1	0.0000	35	37	0.98	0.98	0.96
CM015574.1_RaGOO	33250000	45724411	0	2	0.0000	30	32	0.84	0.86	0.94
CM015574.1_RaGOO	33300000	45724411	1	1	0.0000	37	39	1.02	1.03	0.95
CM015574.1_RaGOO	33350000	45724411	0	0	0.0000	32	33	0.88	0.88	0.97
CM015574.1_RaGOO	33400000	45724411	0	2	0.0000	33	35	0.92	0.94	0.94
CM015574.1_RaGOO	33450000	45724411	0	0	0.0000	38	39	1.07	1.04	0.98
CM015574.1_RaGOO	33500000	45724411	0	5	0.0000	34	36	0.95	0.96	0.95
CM015574.1_RaGOO	33550000	45724411	0	0	0.0000	35	36	0.97	0.96	0.97
CM015574.1_RaGOO	33600000	45724411	0	1	0.0000	34	36	0.95	0.96	0.95
CM015574.1_RaGOO	33650000	45724411	0	0	0.0000	37	39	1.03	1.04	0.95
CM015574.1_RaGOO	33700000	45724411	0	0	0.0000	35	38	0.97	1.01	0.93
CM015574.1_RaGOO	33750000	45724411	0	2	0.0000	33	36	0.92	0.96	0.92
CM015574.1_RaGOO	33800000	45724411	0	0	0.0000	35	36	0.97	0.96	0.97
CM015574.1_RaGOO	33850000	45724411	0	0	0.0000	35	37	0.98	0.99	0.95
CM015574.1_RaGOO	33900000	45724411	5	0	0.0000	35	36	0.97	0.98	0.96
CM015574.1_RaGOO	33950000	45724411	1	7	0.0000	35	36	0.98	0.97	0.97
CM015574.1_RaGOO	34000000	45724411	0	1	0.0000	38	40	1.06	1.08	0.94
CM015574.1_RaGOO	34050000	45724411	1	0	0.0000	38	41	1.07	1.09	0.94
CM015574.1_RaGOO	34100000	45724411	0	1	0.0028	35	35	0.96	0.95	0.98
CM015574.1_RaGOO	34150000	45724411	0	0	0.0000	32	34	0.89	0.92	0.92
CM015574.1_RaGOO	34200000	45724411	0	4	0.0000	35	36	0.97	0.95	0.98
CM015574.1_RaGOO	34250000	45724411	0	1	0.0000	36	37	1.00	0.99	0.97
CM015574.1_RaGOO	34300000	45724411	4	3	0.0000	33	35	0.91	0.93	0.94
CM015574.1_RaGOO	34350000	45724411	1	2	0.0000	41	44	1.13	1.17	0.93
CM015574.1_RaGOO	34400000	45724411	0	0	0.0000	35	37	0.98	0.99	0.95
CM015574.1_RaGOO	34450000	45724411	0	2	0.0000	37	37	1.02	0.99	0.99
CM015574.1_RaGOO	34500000	45724411	2	0	0.0000	43	45	1.21	1.19	0.97
CM015574.1_RaGOO	34550000	45724411	0	0	0.0000	40	40	1.11	1.07	0.99
CM015574.1_RaGOO	34600000	45724411	0	27	0.0000	45	51	1.24	1.38	0.87
CM015574.1_RaGOO	34650000	45724411	0	1	0.0000	36	37	1.01	0.99	0.98
CM015574.1_RaGOO	34700000	45724411	0	2	0.0000	36	37	1.00	0.99	0.97
CM015574.1_RaGOO	34750000	45724411	0	3	0.0000	36	37	1.02	0.99	0.99
CM015574.1_RaGOO	34800000	45724411	3	1	0.0000	33	36	0.92	0.95	0.93
CM015574.1_RaGOO	34850000	45724411	0	8	0.0000	32	33	0.88	0.89	0.95
CM015574.1_RaGOO	34900000	45724411	1	1	0.0000	30	32	0.84	0.86	0.94
CM015574.1_RaGOO	34950000	45724411	0	1	0.0000	33	35	0.92	0.93	0.95
CM015574.1_RaGOO	35000000	45724411	0	0	0.0000	38	39	1.06	1.05	0.97
CM015574.1_RaGOO	35050000	45724411	5	0	0.0000	42	44	1.18	1.18	0.96
CM015574.1_RaGOO	35100000	45724411	0	1	0.0000	38	39	1.07	1.04	0.98
CM015574.1_RaGOO	35150000	45724411	1	0	0.0000	38	40	1.07	1.07	0.96
CM015574.1_RaGOO	35200000	45724411	0	0	0.0047	37	38	1.02	1.02	0.96
CM015574.1_RaGOO	35250000	45724411	6	0	0.0024	36	37	0.99	0.98	0.97
CM015574.1_RaGOO	35300000	45724411	1	0	0.0000	37	38	1.04	1.03	0.98
CM015574.1_RaGOO	35350000	45724411	0	0	0.0000	38	41	1.06	1.09	0.93
CM015574.1_RaGOO	35400000	45724411	0	0	0.0000	33	35	0.93	0.95	0.95
CM015574.1_RaGOO	35450000	45724411	0	0	0.0000	33	35	0.91	0.93	0.94
CM015574.1_RaGOO	35500000	45724411	0	15	0.0000	34	35	0.94	0.94	0.97
CM015574.1_RaGOO	35550000	45724411	0	0	0.0000	35	37	0.97	0.98	0.95
CM015574.1_RaGOO	35600000	45724411	0	1	0.0000	35	37	0.97	0.99	0.94
CM015574.1_RaGOO	35650000	45724411	0	5	0.0000	36	39	1.01	1.04	0.94
CM015574.1_RaGOO	35700000	45724411	0	1	0.0000	31	34	0.87	0.91	0.92
CM015574.1_RaGOO	35750000	45724411	0	0	0.0000	43	44	1.19	1.17	0.98
CM015574.1_RaGOO	35800000	45724411	0	4	0.0000	33	35	0.93	0.93	0.96
CM015574.1_RaGOO	35850000	45724411	0	3	0.0000	32	33	0.88	0.89	0.95
CM015574.1_RaGOO	35900000	45724411	0	3	0.0000	31	33	0.86	0.89	0.93
CM015574.1_RaGOO	35950000	45724411	4	0	0.0000	34	36	0.94	0.96	0.93
CM015574.1_RaGOO	36000000	45724411	0	0	0.0000	31	33	0.86	0.88	0.94
CM015574.1_RaGOO	36050000	45724411	0	0	0.0000	37	37	1.03	1.00	0.99
CM015574.1_RaGOO	36100000	45724411	0	2	0.0187	32	35	0.90	0.93	0.94
CM015574.1_RaGOO	36150000	45724411	0	4	0.0091	33	35	0.91	0.94	0.94
CM015574.1_RaGOO	36200000	45724411	0	11	0.0000	33	36	0.92	0.97	0.92
CM015574.1_RaGOO	36250000	45724411	0	2	0.0000	31	34	0.86	0.92	0.90
CM015574.1_RaGOO	36300000	45724411	0	4	0.0000	52	58	1.46	1.54	0.91
CM015574.1_RaGOO	36350000	45724411	0	0	0.0000	31	33	0.88	0.89	0.95
CM015574.1_RaGOO	36400000	45724411	4	1	0.0000	51	56	1.43	1.49	0.92
CM015574.1_RaGOO	36450000	45724411	1	2	0.0000	33	35	0.92	0.94	0.94
CM015574.1_RaGOO	36500000	45724411	0	2	0.0000	35	36	0.97	0.97	0.95
CM015574.1_RaGOO	36550000	45724411	0	2	0.0000	35	36	0.96	0.97	0.95
CM015574.1_RaGOO	36600000	45724411	1	0	0.0000	34	35	0.95	0.94	0.98
CM015574.1_RaGOO	36650000	45724411	0	0	0.0000	32	34	0.89	0.92	0.94
CM015574.1_RaGOO	36700000	45724411	0	0	0.0000	36	38	0.99	1.01	0.94
CM015574.1_RaGOO	36750000	45724411	0	0	0.0000	36	38	1.01	1.03	0.95
CM015574.1_RaGOO	36800000	45724411	4	0	0.0000	34	37	0.95	0.98	0.93
CM015574.1_RaGOO	36850000	45724411	0	0	0.0000	31	33	0.87	0.89	0.94
CM015574.1_RaGOO	36900000	45724411	4	0	0.0210	33	36	0.93	0.96	0.94
CM015574.1_RaGOO	36950000	45724411	2	0	0.0000	38	39	1.06	1.03	0.98
CM015574.1_RaGOO	37000000	45724411	0	1	0.0000	30	31	0.84	0.83	0.97
CM015574.1_RaGOO	37050000	45724411	0	1	0.0000	33	35	0.91	0.93	0.94
CM015574.1_RaGOO	37100000	45724411	1	4	0.0062	32	34	0.88	0.91	0.93
CM015574.1_RaGOO	37150000	45724411	0	7	0.0000	32	34	0.88	0.91	0.94
CM015574.1_RaGOO	37200000	45724411	0	0	0.0000	37	37	1.03	1.00	0.98
CM015574.1_RaGOO	37250000	45724411	0	0	0.0000	38	38	1.06	1.02	1.00
CM015574.1_RaGOO	37300000	45724411	1	2	0.0000	37	39	1.04	1.05	0.95
CM015574.1_RaGOO	37350000	45724411	1	2	0.0000	36	37	1.00	0.99	0.97
CM015574.1_RaGOO	37400000	45724411	2	1	0.0000	34	34	0.94	0.91	0.98
CM015574.1_RaGOO	37450000	45724411	1	26	0.0036	32	36	0.88	0.96	0.88
CM015574.1_RaGOO	37500000	45724411	4	9	0.0000	31	36	0.87	0.96	0.88
CM015574.1_RaGOO	37550000	45724411	0	79	0.0486	33	35	0.92	0.95	0.94
CM015574.1_RaGOO	37600000	45724411	7	24	0.0127	35	36	0.98	0.97	0.97
CM015574.1_RaGOO	37650000	45724411	2	0	0.0002	34	37	0.94	0.99	0.92
CM015574.1_RaGOO	37700000	45724411	0	1	0.0000	33	35	0.91	0.95	0.92
CM015574.1_RaGOO	37750000	45724411	0	0	0.0000	36	38	1.00	1.01	0.95
CM015574.1_RaGOO	37800000	45724411	1	1	0.0000	58	60	1.62	1.61	0.97
CM015574.1_RaGOO	37850000	45724411	0	0	0.0000	36	36	1.00	0.98	0.99
CM015574.1_RaGOO	37900000	45724411	0	1	0.0000	38	38	1.05	1.02	0.98
CM015574.1_RaGOO	37950000	45724411	0	0	0.0000	39	40	1.09	1.08	0.97
CM015574.1_RaGOO	38000000	45724411	1	0	0.0000	35	36	0.97	0.97	0.96
CM015574.1_RaGOO	38050000	45724411	0	0	0.0000	34	38	0.96	1.00	0.92
CM015574.1_RaGOO	38100000	45724411	0	0	0.0000	37	38	1.02	1.01	0.97
CM015574.1_RaGOO	38150000	45724411	0	0	0.0000	33	36	0.93	0.96	0.94
CM015574.1_RaGOO	38200000	45724411	0	0	0.0000	36	38	1.00	1.02	0.94
CM015574.1_RaGOO	38250000	45724411	0	1	0.0000	33	35	0.92	0.92	0.96
CM015574.1_RaGOO	38300000	45724411	2	0	0.0000	33	35	0.91	0.94	0.93
CM015574.1_RaGOO	38350000	45724411	1	0	0.0000	32	32	0.88	0.85	0.99
CM015574.1_RaGOO	38400000	45724411	0	0	0.0000	23	23	0.64	0.60	1.03
CM015574.1_RaGOO	38450000	45724411	0	0	0.0000	38	40	1.07	1.06	0.97
CM015574.1_RaGOO	38500000	45724411	0	1	0.0000	36	38	1.00	1.01	0.95
CM015574.1_RaGOO	38550000	45724411	1	0	0.0000	37	38	1.02	1.00	0.98
CM015574.1_RaGOO	38600000	45724411	0	0	0.0000	40	39	1.10	1.04	1.02
CM015574.1_RaGOO	38650000	45724411	0	0	0.0000	35	37	0.99	1.00	0.95
CM015574.1_RaGOO	38700000	45724411	1	0	0.0000	35	36	0.96	0.96	0.97
CM015574.1_RaGOO	38750000	45724411	2	3	0.0000	33	34	0.91	0.91	0.96
CM015574.1_RaGOO	38800000	45724411	1	5	0.0003	32	32	0.89	0.87	0.99
CM015574.1_RaGOO	38850000	45724411	0	0	0.0000	32	34	0.90	0.92	0.93
CM015574.1_RaGOO	38900000	45724411	0	0	0.0000	34	36	0.95	0.97	0.94
CM015574.1_RaGOO	38950000	45724411	0	0	0.0000	39	40	1.08	1.08	0.96
CM015574.1_RaGOO	39000000	45724411	0	0	0.0000	40	41	1.10	1.09	0.97
CM015574.1_RaGOO	39050000	45724411	0	0	0.0000	34	36	0.96	0.96	0.96
CM015574.1_RaGOO	39100000	45724411	0	0	0.0000	37	38	1.04	1.03	0.97
CM015574.1_RaGOO	39150000	45724411	0	2	0.0000	39	39	1.09	1.03	1.01
CM015574.1_RaGOO	39200000	45724411	1	2	0.0075	23	24	0.65	0.63	0.99
CM015574.1_RaGOO	39250000	45724411	1	0	0.0000	34	35	0.94	0.93	0.97
CM015574.1_RaGOO	39300000	45724411	17	0	0.0000	32	34	0.90	0.90	0.96
CM015574.1_RaGOO	39350000	45724411	1	0	0.0000	19	20	0.52	0.52	0.95
CM015574.1_RaGOO	39400000	45724411	0	2	0.0090	30	32	0.84	0.85	0.95
CM015574.1_RaGOO	39450000	45724411	1	5	0.0182	41	42	1.16	1.12	0.99
CM015574.1_RaGOO	39500000	45724411	0	16	0.0000	35	36	0.99	0.97	0.98
CM015574.1_RaGOO	39550000	45724411	0	12	0.0051	34	35	0.94	0.93	0.97
CM015574.1_RaGOO	39600000	45724411	0	4	0.0000	34	36	0.94	0.96	0.94
CM015574.1_RaGOO	39650000	45724411	0	6	0.0000	33	35	0.92	0.94	0.94
CM015574.1_RaGOO	39700000	45724411	0	17	0.0000	15	15	0.41	0.41	0.96
CM015574.1_RaGOO	39750000	45724411	0	14	0.0134	28	28	0.77	0.75	0.99
CM015574.1_RaGOO	39800000	45724411	0	27	0.0212	37	38	1.04	1.03	0.97
CM015574.1_RaGOO	39850000	45724411	0	3	0.0038	40	42	1.12	1.11	0.97
CM015574.1_RaGOO	39900000	45724411	2	3	0.0000	34	35	0.96	0.95	0.97
CM015574.1_RaGOO	39950000	45724411	1	18	0.0131	42	39	1.16	1.03	1.08
CM015574.1_RaGOO	40000000	45724411	0	27	0.0128	41	42	1.13	1.13	0.97
CM015574.1_RaGOO	40050000	45724411	0	11	0.0109	34	36	0.95	0.95	0.95
CM015574.1_RaGOO	40100000	45724411	0	1	0.0077	35	36	0.99	0.97	0.98
CM015574.1_RaGOO	40150000	45724411	0	9	0.0000	38	40	1.06	1.08	0.94
CM015574.1_RaGOO	40200000	45724411	0	0	0.0000	35	35	0.98	0.95	1.00
CM015574.1_RaGOO	40250000	45724411	0	0	0.0000	35	36	0.98	0.97	0.96
CM015574.1_RaGOO	40300000	45724411	1	3	0.0000	35	35	0.97	0.95	0.98
CM015574.1_RaGOO	40350000	45724411	3	0	0.0000	32	35	0.90	0.94	0.92
CM015574.1_RaGOO	40400000	45724411	1	26	0.0000	47	49	1.31	1.32	0.96
CM015574.1_RaGOO	40450000	45724411	0	1	0.0000	35	36	0.98	0.95	0.99
CM015574.1_RaGOO	40500000	45724411	0	0	0.0000	36	38	1.00	1.03	0.93
CM015574.1_RaGOO	40550000	45724411	3	2	0.0000	38	41	1.05	1.10	0.92
CM015574.1_RaGOO	40600000	45724411	2	3	0.0000	37	38	1.02	1.02	0.96
CM015574.1_RaGOO	40650000	45724411	0	2	0.0000	42	42	1.16	1.13	0.98
CM015574.1_RaGOO	40700000	45724411	0	0	0.0000	37	38	1.04	1.02	0.98
CM015574.1_RaGOO	40750000	45724411	0	0	0.0000	36	38	1.00	1.01	0.95
CM015574.1_RaGOO	40800000	45724411	0	0	0.0000	35	36	0.97	0.97	0.97
CM015574.1_RaGOO	40850000	45724411	0	1	0.0000	36	36	0.99	0.96	0.99
CM015574.1_RaGOO	40900000	45724411	0	0	0.0000	44	47	1.21	1.25	0.93
CM015574.1_RaGOO	40950000	45724411	6	0	0.0000	34	35	0.96	0.93	0.99
CM015574.1_RaGOO	41000000	45724411	0	3	0.0000	20	22	0.57	0.58	0.94
CM015574.1_RaGOO	41050000	45724411	10	1	0.0000	37	40	1.03	1.07	0.93
CM015574.1_RaGOO	41100000	45724411	0	1	0.0000	36	36	1.00	0.96	0.99
CM015574.1_RaGOO	41150000	45724411	0	0	0.0000	38	39	1.07	1.04	0.99
CM015574.1_RaGOO	41200000	45724411	0	0	0.0000	36	37	0.99	0.99	0.96
CM015574.1_RaGOO	41250000	45724411	0	0	0.0000	37	38	1.03	1.02	0.97
CM015574.1_RaGOO	41300000	45724411	1	0	0.0000	48	51	1.34	1.37	0.94
CM015574.1_RaGOO	41350000	45724411	1	0	0.0000	33	35	0.92	0.94	0.94
CM015574.1_RaGOO	41400000	45724411	0	1	0.0000	34	36	0.94	0.95	0.95
CM015574.1_RaGOO	41450000	45724411	0	0	0.0000	41	44	1.14	1.17	0.93
CM015574.1_RaGOO	41500000	45724411	0	0	0.0000	34	35	0.95	0.93	0.98
CM015574.1_RaGOO	41550000	45724411	3	2	0.0000	33	34	0.92	0.92	0.97
CM015574.1_RaGOO	41600000	45724411	2	3	0.0000	36	37	1.00	1.00	0.96
CM015574.1_RaGOO	41650000	45724411	0	1	0.0000	37	38	1.03	1.02	0.97
CM015574.1_RaGOO	41700000	45724411	0	4	0.0000	33	33	0.91	0.90	0.97
CM015574.1_RaGOO	41750000	45724411	1	0	0.0000	39	39	1.08	1.04	1.00
CM015574.1_RaGOO	41800000	45724411	0	0	0.0000	36	37	1.01	1.00	0.96
CM015574.1_RaGOO	41850000	45724411	1	0	0.0000	35	37	0.97	1.00	0.93
CM015574.1_RaGOO	41900000	45724411	0	3	0.0000	38	39	1.05	1.04	0.97
CM015574.1_RaGOO	41950000	45724411	0	0	0.0000	37	37	1.02	1.00	0.99
CM015574.1_RaGOO	42000000	45724411	0	0	0.0000	35	37	0.99	1.00	0.95
CM015574.1_RaGOO	42050000	45724411	0	0	0.0000	34	36	0.96	0.95	0.97
CM015574.1_RaGOO	42100000	45724411	0	1	0.0000	31	33	0.87	0.89	0.95
CM015574.1_RaGOO	42150000	45724411	0	0	0.0000	38	40	1.05	1.07	0.94
CM015574.1_RaGOO	42200000	45724411	1	0	0.0000	34	35	0.96	0.94	0.98
CM015574.1_RaGOO	42250000	45724411	0	0	0.0000	37	37	1.03	1.00	1.00
CM015574.1_RaGOO	42300000	45724411	0	0	0.0000	36	38	1.01	1.01	0.95
CM015574.1_RaGOO	42350000	45724411	0	6	0.0000	33	36	0.93	0.96	0.93
CM015574.1_RaGOO	42400000	45724411	0	0	0.0000	32	35	0.88	0.93	0.91
CM015574.1_RaGOO	42450000	45724411	0	0	0.0000	31	33	0.86	0.88	0.94
CM015574.1_RaGOO	42500000	45724411	0	2	0.0000	35	36	0.97	0.97	0.95
CM015574.1_RaGOO	42550000	45724411	0	0	0.0000	40	40	1.10	1.08	0.98
CM015574.1_RaGOO	42600000	45724411	0	0	0.0000	33	34	0.91	0.92	0.95
CM015574.1_RaGOO	42650000	45724411	2	0	0.0000	33	35	0.91	0.94	0.93
CM015574.1_RaGOO	42700000	45724411	7	0	0.0000	33	35	0.93	0.94	0.95
CM015574.1_RaGOO	42750000	45724411	0	1	0.0000	35	36	0.97	0.97	0.95
CM015574.1_RaGOO	42800000	45724411	0	1	0.0000	36	37	1.01	0.99	0.99
CM015574.1_RaGOO	42850000	45724411	0	0	0.0000	33	33	0.91	0.88	0.99
CM015574.1_RaGOO	42900000	45724411	0	0	0.0000	39	42	1.09	1.12	0.93
CM015574.1_RaGOO	42950000	45724411	0	0	0.0000	34	37	0.95	0.99	0.92
CM015574.1_RaGOO	43000000	45724411	0	1	0.0000	34	35	0.95	0.95	0.96
CM015574.1_RaGOO	43050000	45724411	2	0	0.0000	35	37	0.97	1.00	0.93
CM015574.1_RaGOO	43100000	45724411	0	1	0.0000	31	33	0.86	0.88	0.94
CM015574.1_RaGOO	43150000	45724411	2	15	0.0000	29	31	0.80	0.83	0.93
CM015574.1_RaGOO	43200000	45724411	1	0	0.0000	30	32	0.84	0.85	0.95
CM015574.1_RaGOO	43250000	45724411	1	0	0.0000	35	37	0.97	0.98	0.95
CM015574.1_RaGOO	43300000	45724411	0	0	0.0000	36	37	1.01	1.00	0.97
CM015574.1_RaGOO	43350000	45724411	0	0	0.0000	36	37	1.00	0.98	0.97
CM015574.1_RaGOO	43400000	45724411	0	0	0.0000	36	36	0.99	0.97	0.98
CM015574.1_RaGOO	43450000	45724411	0	0	0.0000	36	38	1.01	1.02	0.95
CM015574.1_RaGOO	43500000	45724411	0	0	0.0000	35	36	0.96	0.98	0.95
CM015574.1_RaGOO	43550000	45724411	0	1	0.0000	42	46	1.18	1.23	0.92
CM015574.1_RaGOO	43600000	45724411	0	0	0.0000	33	35	0.93	0.95	0.94
CM015574.1_RaGOO	43650000	45724411	2	0	0.0000	27	28	0.76	0.74	0.99
CM015574.1_RaGOO	43700000	45724411	0	0	0.0000	33	34	0.92	0.92	0.96
CM015574.1_RaGOO	43750000	45724411	0	0	0.0000	21	21	0.57	0.57	0.96
CM015574.1_RaGOO	43800000	45724411	0	0	0.0000	37	39	1.04	1.05	0.95
CM015574.1_RaGOO	43850000	45724411	1	1	0.0000	33	35	0.93	0.94	0.95
CM015574.1_RaGOO	43900000	45724411	0	0	0.0000	36	37	1.00	0.99	0.97
CM015574.1_RaGOO	43950000	45724411	0	0	0.0000	31	32	0.88	0.87	0.97
CM015574.1_RaGOO	44000000	45724411	0	0	0.0000	38	40	1.06	1.07	0.95
CM015574.1_RaGOO	44050000	45724411	0	0	0.0000	39	39	1.08	1.04	0.99
CM015574.1_RaGOO	44100000	45724411	0	0	0.0000	34	35	0.94	0.93	0.97
CM015574.1_RaGOO	44150000	45724411	1	0	0.0000	44	45	1.23	1.22	0.97
CM015574.1_RaGOO	44200000	45724411	0	0	0.0000	34	36	0.96	0.97	0.95
CM015574.1_RaGOO	44250000	45724411	0	6	0.0000	40	40	1.10	1.08	0.98
CM015574.1_RaGOO	44300000	45724411	1	0	0.0000	36	38	1.02	1.02	0.96
CM015574.1_RaGOO	44350000	45724411	0	0	0.0000	36	38	1.01	1.02	0.95
CM015574.1_RaGOO	44400000	45724411	0	0	0.0000	39	40	1.09	1.07	0.98
CM015574.1_RaGOO	44450000	45724411	0	0	0.0000	36	39	1.00	1.03	0.94
CM015574.1_RaGOO	44500000	45724411	0	1	0.0000	51	52	1.41	1.40	0.97
CM015574.1_RaGOO	44550000	45724411	1	0	0.0000	39	40	1.08	1.08	0.96
CM015574.1_RaGOO	44600000	45724411	1	0	0.0000	35	35	0.97	0.94	0.99
CM015574.1_RaGOO	44650000	45724411	0	0	0.0000	36	36	1.00	0.97	0.99
CM015574.1_RaGOO	44700000	45724411	0	0	0.0000	32	33	0.88	0.88	0.95
CM015574.1_RaGOO	44750000	45724411	0	0	0.0000	36	35	0.99	0.94	1.01
CM015574.1_RaGOO	44800000	45724411	1	0	0.0000	36	36	0.99	0.97	0.98
CM015574.1_RaGOO	44850000	45724411	1	0	0.0000	35	37	0.98	0.99	0.95
CM015574.1_RaGOO	44900000	45724411	0	0	0.0000	30	32	0.84	0.86	0.94
CM015574.1_RaGOO	44950000	45724411	0	0	0.0000	35	38	0.98	1.02	0.92
CM015574.1_RaGOO	45000000	45724411	1	0	0.0000	67	68	1.86	1.82	0.98
CM015574.1_RaGOO	45050000	45724411	0	0	0.0000	32	34	0.89	0.91	0.95
CM015574.1_RaGOO	45100000	45724411	2	0	0.0000	35	37	0.99	1.00	0.95
CM015574.1_RaGOO	45150000	45724411	0	0	0.0000	36	37	1.00	0.99	0.96
CM015574.1_RaGOO	45200000	45724411	1	1	0.0000	47	48	1.30	1.29	0.97
CM015574.1_RaGOO	45250000	45724411	0	2	0.0000	41	42	1.13	1.14	0.96
CM015574.1_RaGOO	45300000	45724411	0	0	0.0000	37	38	1.04	1.02	0.97
CM015574.1_RaGOO	45350000	45724411	0	0	0.0000	36	37	0.99	0.98	0.97
CM015574.1_RaGOO	45400000	45724411	1	2	0.0000	16	17	0.44	0.46	0.92
CM015574.1_RaGOO	45450000	45724411	0	5	0.0000	22	25	0.62	0.66	0.91
CM015574.1_RaGOO	45500000	45724411	0	1	0.0000	36	36	1.01	0.97	1.00
CM015574.1_RaGOO	45550000	45724411	0	0	0.0000	36	38	1.00	1.02	0.94
CM015574.1_RaGOO	45600000	45724411	2	0	0.0000	37	38	1.03	1.01	0.98
CM015574.1_RaGOO	45650000	45724411	0	0	0.0000	24	26	0.68	0.69	0.95
CM015574.1_RaGOO	45675000	45724411	10	6	0.0000	132	134	3.68	3.57	0.99
CM015575.1_RaGOO	0	40709407	0	0	0.0000	27	28	0.75	0.76	0.96
CM015575.1_RaGOO	50000	40709407	2	0	0.0000	32	35	0.89	0.93	0.92
CM015575.1_RaGOO	100000	40709407	0	1	0.0000	34	36	0.96	0.97	0.95
CM015575.1_RaGOO	150000	40709407	0	0	0.0000	35	36	0.96	0.97	0.96
CM015575.1_RaGOO	200000	40709407	0	1	0.0000	34	35	0.94	0.93	0.98
CM015575.1_RaGOO	250000	40709407	0	0	0.0000	32	33	0.89	0.89	0.96
CM015575.1_RaGOO	300000	40709407	0	0	0.0000	35	35	0.97	0.94	0.98
CM015575.1_RaGOO	350000	40709407	0	0	0.0000	37	37	1.03	1.00	0.99
CM015575.1_RaGOO	400000	40709407	0	3	0.0000	35	37	0.98	0.99	0.95
CM015575.1_RaGOO	450000	40709407	2	1	0.0000	31	34	0.87	0.91	0.92
CM015575.1_RaGOO	500000	40709407	0	1	0.0000	30	34	0.84	0.90	0.90
CM015575.1_RaGOO	550000	40709407	6	24	0.0000	11	12	0.32	0.33	0.92
CM015575.1_RaGOO	600000	40709407	7	6	0.0000	24	25	0.67	0.66	0.97
CM015575.1_RaGOO	650000	40709407	4	0	0.0000	34	34	0.94	0.90	1.00
CM015575.1_RaGOO	700000	40709407	1	6	0.0000	32	33	0.89	0.89	0.97
CM015575.1_RaGOO	750000	40709407	3	0	0.0000	8	9	0.23	0.24	0.95
CM015575.1_RaGOO	800000	40709407	6	3	0.0000	35	36	0.99	0.97	0.98
CM015575.1_RaGOO	850000	40709407	4	3	0.0000	31	34	0.88	0.92	0.91
CM015575.1_RaGOO	900000	40709407	1	0	0.0000	33	35	0.92	0.93	0.95
CM015575.1_RaGOO	950000	40709407	6	3	0.0000	29	30	0.81	0.80	0.98
CM015575.1_RaGOO	1000000	40709407	0	4	0.0000	33	36	0.93	0.95	0.94
CM015575.1_RaGOO	1050000	40709407	0	0	0.0000	35	36	0.97	0.96	0.97
CM015575.1_RaGOO	1100000	40709407	13	1	0.0000	30	31	0.83	0.83	0.95
CM015575.1_RaGOO	1150000	40709407	1	2	0.0000	34	35	0.94	0.94	0.95
CM015575.1_RaGOO	1200000	40709407	1	1	0.0000	34	36	0.96	0.98	0.94
CM015575.1_RaGOO	1250000	40709407	0	0	0.0000	33	34	0.91	0.91	0.97
CM015575.1_RaGOO	1300000	40709407	3	2	0.0000	36	37	1.01	1.00	0.98
CM015575.1_RaGOO	1350000	40709407	2	8	0.0000	34	36	0.94	0.96	0.95
CM015575.1_RaGOO	1400000	40709407	1	1	0.0000	30	32	0.84	0.84	0.95
CM015575.1_RaGOO	1450000	40709407	0	0	0.0000	32	33	0.89	0.87	0.98
CM015575.1_RaGOO	1500000	40709407	3	3	0.0000	37	38	1.03	1.02	0.97
CM015575.1_RaGOO	1550000	40709407	2	1	0.0000	26	28	0.73	0.75	0.94
CM015575.1_RaGOO	1600000	40709407	5	2	0.0000	36	38	1.00	1.01	0.95
CM015575.1_RaGOO	1650000	40709407	0	1	0.0000	36	36	0.99	0.97	0.98
CM015575.1_RaGOO	1700000	40709407	3	2	0.0000	38	40	1.06	1.06	0.96
CM015575.1_RaGOO	1750000	40709407	1	3	0.0000	35	36	0.99	0.97	0.98
CM015575.1_RaGOO	1800000	40709407	10	1	0.0000	39	39	1.10	1.04	1.01
CM015575.1_RaGOO	1850000	40709407	0	0	0.0000	40	41	1.11	1.11	0.96
CM015575.1_RaGOO	1900000	40709407	0	1	0.0000	36	37	0.99	0.98	0.97
CM015575.1_RaGOO	1950000	40709407	0	0	0.0000	34	34	0.95	0.92	0.99
CM015575.1_RaGOO	2000000	40709407	3	0	0.0070	35	37	0.97	0.99	0.95
CM015575.1_RaGOO	2050000	40709407	2	4	0.0000	37	39	1.03	1.03	0.96
CM015575.1_RaGOO	2100000	40709407	3	0	0.0000	37	38	1.03	1.01	0.98
CM015575.1_RaGOO	2150000	40709407	0	5	0.0000	37	38	1.03	1.01	0.97
CM015575.1_RaGOO	2200000	40709407	2	0	0.0000	37	39	1.03	1.04	0.96
CM015575.1_RaGOO	2250000	40709407	1	8	0.0000	36	37	1.01	1.00	0.97
CM015575.1_RaGOO	2300000	40709407	0	4	0.0000	31	32	0.86	0.85	0.98
CM015575.1_RaGOO	2350000	40709407	1	2	0.0000	12	13	0.33	0.34	0.93
CM015575.1_RaGOO	2400000	40709407	4	3	0.0000	27	30	0.75	0.79	0.91
CM015575.1_RaGOO	2450000	40709407	0	1	0.0000	28	29	0.78	0.77	0.97
CM015575.1_RaGOO	2500000	40709407	7	0	0.0000	9	9	0.25	0.24	0.98
CM015575.1_RaGOO	2550000	40709407	0	0	0.0000	4	4	0.11	0.12	0.89
CM015575.1_RaGOO	2600000	40709407	3	3	0.0000	29	30	0.80	0.79	0.97
CM015575.1_RaGOO	2650000	40709407	6	0	0.0000	32	33	0.90	0.89	0.97
CM015575.1_RaGOO	2700000	40709407	0	3	0.0000	27	27	0.75	0.73	0.98
CM015575.1_RaGOO	2750000	40709407	0	2	0.0000	34	36	0.96	0.97	0.95
CM015575.1_RaGOO	2800000	40709407	2	0	0.0000	37	38	1.03	1.00	0.98
CM015575.1_RaGOO	2850000	40709407	1	1	0.0000	34	35	0.94	0.94	0.96
CM015575.1_RaGOO	2900000	40709407	1	2	0.0000	36	36	1.01	0.97	0.99
CM015575.1_RaGOO	2950000	40709407	0	6	0.0000	37	37	1.03	0.99	0.99
CM015575.1_RaGOO	3000000	40709407	3	0	0.0000	37	38	1.04	1.01	0.98
CM015575.1_RaGOO	3050000	40709407	1	0	0.0000	39	39	1.07	1.04	0.99
CM015575.1_RaGOO	3100000	40709407	1	0	0.0000	37	39	1.02	1.04	0.94
CM015575.1_RaGOO	3150000	40709407	1	0	0.0000	39	39	1.08	1.05	0.98
CM015575.1_RaGOO	3200000	40709407	1	1	0.0000	37	38	1.03	1.01	0.97
CM015575.1_RaGOO	3250000	40709407	0	0	0.0000	39	41	1.09	1.10	0.95
CM015575.1_RaGOO	3300000	40709407	2	1	0.0000	38	37	1.06	1.00	1.02
CM015575.1_RaGOO	3350000	40709407	2	0	0.0000	33	34	0.91	0.92	0.95
CM015575.1_RaGOO	3400000	40709407	0	1	0.0000	37	38	1.03	1.03	0.97
CM015575.1_RaGOO	3450000	40709407	0	1	0.0000	38	39	1.05	1.03	0.98
CM015575.1_RaGOO	3500000	40709407	0	2	0.0000	40	40	1.11	1.08	0.99
CM015575.1_RaGOO	3550000	40709407	0	3	0.0000	37	37	1.02	1.00	0.99
CM015575.1_RaGOO	3600000	40709407	1	1	0.0000	42	42	1.17	1.13	1.00
CM015575.1_RaGOO	3650000	40709407	1	1	0.0000	44	43	1.21	1.16	1.00
CM015575.1_RaGOO	3700000	40709407	2	1	0.0000	41	41	1.14	1.09	1.00
CM015575.1_RaGOO	3750000	40709407	2	1	0.0000	38	39	1.07	1.05	0.97
CM015575.1_RaGOO	3800000	40709407	0	0	0.0000	38	40	1.06	1.07	0.96
CM015575.1_RaGOO	3850000	40709407	0	3	0.0000	41	42	1.14	1.13	0.97
CM015575.1_RaGOO	3900000	40709407	0	1	0.0000	36	37	1.00	1.00	0.97
CM015575.1_RaGOO	3950000	40709407	0	0	0.0000	36	38	1.01	1.01	0.96
CM015575.1_RaGOO	4000000	40709407	3	3	0.0000	37	39	1.04	1.05	0.95
CM015575.1_RaGOO	4050000	40709407	5	0	0.0000	37	38	1.03	1.01	0.98
CM015575.1_RaGOO	4100000	40709407	0	0	0.0000	43	46	1.21	1.24	0.94
CM015575.1_RaGOO	4150000	40709407	0	4	0.0000	36	38	1.01	1.01	0.96
CM015575.1_RaGOO	4200000	40709407	2	4	0.0000	35	36	0.97	0.95	0.98
CM015575.1_RaGOO	4250000	40709407	0	6	0.0026	37	36	1.02	0.97	1.01
CM015575.1_RaGOO	4300000	40709407	0	0	0.0000	41	41	1.14	1.10	1.00
CM015575.1_RaGOO	4350000	40709407	2	1	0.0063	38	39	1.05	1.05	0.96
CM015575.1_RaGOO	4400000	40709407	0	0	0.0000	37	39	1.04	1.03	0.96
CM015575.1_RaGOO	4450000	40709407	3	8	0.0170	40	41	1.10	1.09	0.97
CM015575.1_RaGOO	4500000	40709407	0	0	0.0000	39	39	1.10	1.05	1.01
CM015575.1_RaGOO	4550000	40709407	1	0	0.0000	36	37	1.01	0.99	0.99
CM015575.1_RaGOO	4600000	40709407	0	0	0.0000	37	39	1.04	1.04	0.96
CM015575.1_RaGOO	4650000	40709407	0	0	0.0000	36	39	1.01	1.03	0.94
CM015575.1_RaGOO	4700000	40709407	0	0	0.0000	40	40	1.13	1.08	1.01
CM015575.1_RaGOO	4750000	40709407	3	0	0.0000	39	39	1.09	1.05	0.99
CM015575.1_RaGOO	4800000	40709407	0	2	0.0000	39	40	1.08	1.06	0.98
CM015575.1_RaGOO	4850000	40709407	0	2	0.0000	40	40	1.13	1.07	1.01
CM015575.1_RaGOO	4900000	40709407	0	0	0.0000	40	41	1.11	1.09	0.97
CM015575.1_RaGOO	4950000	40709407	0	5	0.0061	34	35	0.95	0.95	0.96
CM015575.1_RaGOO	5000000	40709407	5	0	0.0000	40	40	1.11	1.07	0.99
CM015575.1_RaGOO	5050000	40709407	0	5	0.0000	39	40	1.07	1.06	0.97
CM015575.1_RaGOO	5100000	40709407	0	4	0.0000	40	41	1.11	1.09	0.98
CM015575.1_RaGOO	5150000	40709407	1	4	0.0000	41	43	1.13	1.15	0.95
CM015575.1_RaGOO	5200000	40709407	0	0	0.0000	43	42	1.19	1.12	1.02
CM015575.1_RaGOO	5250000	40709407	2	0	0.0000	36	36	0.99	0.97	0.98
CM015575.1_RaGOO	5300000	40709407	2	2	0.0000	41	43	1.15	1.15	0.96
CM015575.1_RaGOO	5350000	40709407	0	0	0.0000	40	42	1.11	1.12	0.95
CM015575.1_RaGOO	5400000	40709407	0	6	0.0000	40	41	1.12	1.10	0.98
CM015575.1_RaGOO	5450000	40709407	0	0	0.0000	38	39	1.05	1.04	0.97
CM015575.1_RaGOO	5500000	40709407	0	8	0.0149	37	38	1.02	1.02	0.97
CM015575.1_RaGOO	5550000	40709407	3	4	0.0000	39	39	1.08	1.06	0.99
CM015575.1_RaGOO	5600000	40709407	0	2	0.0000	40	40	1.10	1.07	0.99
CM015575.1_RaGOO	5650000	40709407	1	0	0.0000	41	43	1.14	1.16	0.94
CM015575.1_RaGOO	5700000	40709407	0	0	0.0000	43	46	1.21	1.22	0.95
CM015575.1_RaGOO	5750000	40709407	0	2	0.0000	39	40	1.10	1.08	0.98
CM015575.1_RaGOO	5800000	40709407	0	0	0.0000	39	41	1.10	1.09	0.97
CM015575.1_RaGOO	5850000	40709407	0	2	0.0000	34	35	0.94	0.93	0.97
CM015575.1_RaGOO	5900000	40709407	1	1	0.0000	38	40	1.07	1.06	0.97
CM015575.1_RaGOO	5950000	40709407	0	1	0.0008	41	41	1.15	1.10	1.00
CM015575.1_RaGOO	6000000	40709407	1	1	0.0000	38	39	1.05	1.04	0.97
CM015575.1_RaGOO	6050000	40709407	0	1	0.0000	40	41	1.12	1.11	0.97
CM015575.1_RaGOO	6100000	40709407	0	4	0.0000	39	39	1.10	1.05	1.00
CM015575.1_RaGOO	6150000	40709407	0	0	0.0000	40	42	1.12	1.13	0.96
CM015575.1_RaGOO	6200000	40709407	0	0	0.0000	39	41	1.10	1.09	0.97
CM015575.1_RaGOO	6250000	40709407	2	0	0.0000	39	40	1.09	1.06	0.99
CM015575.1_RaGOO	6300000	40709407	0	0	0.0000	40	41	1.12	1.10	0.97
CM015575.1_RaGOO	6350000	40709407	6	0	0.0000	39	40	1.09	1.08	0.97
CM015575.1_RaGOO	6400000	40709407	0	0	0.0000	40	42	1.12	1.12	0.96
CM015575.1_RaGOO	6450000	40709407	0	0	0.0000	41	42	1.14	1.13	0.96
CM015575.1_RaGOO	6500000	40709407	4	1	0.0000	39	41	1.08	1.10	0.94
CM015575.1_RaGOO	6550000	40709407	1	7	0.0045	38	40	1.07	1.08	0.96
CM015575.1_RaGOO	6600000	40709407	0	1	0.0000	41	43	1.15	1.16	0.95
CM015575.1_RaGOO	6650000	40709407	0	0	0.0000	35	37	0.98	0.99	0.95
CM015575.1_RaGOO	6700000	40709407	0	2	0.0000	34	36	0.93	0.95	0.94
CM015575.1_RaGOO	6750000	40709407	0	1	0.0000	36	38	1.01	1.02	0.95
CM015575.1_RaGOO	6800000	40709407	2	0	0.0000	35	36	0.96	0.97	0.96
CM015575.1_RaGOO	6850000	40709407	2	1	0.0000	42	43	1.16	1.15	0.98
CM015575.1_RaGOO	6900000	40709407	1	1	0.0000	35	36	0.98	0.96	0.97
CM015575.1_RaGOO	6950000	40709407	14	2	0.0116	33	33	0.93	0.89	0.99
CM015575.1_RaGOO	7000000	40709407	1	0	0.0000	37	38	1.02	1.01	0.97
CM015575.1_RaGOO	7050000	40709407	0	0	0.0000	35	36	0.96	0.97	0.96
CM015575.1_RaGOO	7100000	40709407	3	0	0.0000	39	41	1.08	1.10	0.94
CM015575.1_RaGOO	7150000	40709407	0	0	0.0000	40	40	1.10	1.07	0.99
CM015575.1_RaGOO	7200000	40709407	0	2	0.0000	36	38	0.99	1.01	0.94
CM015575.1_RaGOO	7250000	40709407	0	0	0.0000	39	40	1.10	1.08	0.98
CM015575.1_RaGOO	7300000	40709407	1	1	0.0000	39	40	1.08	1.08	0.97
CM015575.1_RaGOO	7350000	40709407	2	0	0.0000	37	39	1.04	1.05	0.95
CM015575.1_RaGOO	7400000	40709407	5	1	0.0000	40	40	1.12	1.08	1.00
CM015575.1_RaGOO	7450000	40709407	1	0	0.0000	39	40	1.08	1.07	0.97
CM015575.1_RaGOO	7500000	40709407	0	0	0.0000	41	41	1.15	1.10	1.01
CM015575.1_RaGOO	7550000	40709407	1	1	0.0000	42	41	1.17	1.10	1.02
CM015575.1_RaGOO	7600000	40709407	0	0	0.0000	39	40	1.08	1.08	0.96
CM015575.1_RaGOO	7650000	40709407	0	0	0.0000	38	39	1.05	1.05	0.96
CM015575.1_RaGOO	7700000	40709407	1	0	0.0000	39	41	1.08	1.09	0.96
CM015575.1_RaGOO	7750000	40709407	0	0	0.0000	44	45	1.23	1.21	0.97
CM015575.1_RaGOO	7800000	40709407	1	0	0.0000	39	41	1.07	1.09	0.95
CM015575.1_RaGOO	7850000	40709407	0	0	0.0000	36	38	0.99	1.03	0.93
CM015575.1_RaGOO	7900000	40709407	0	2	0.0000	40	41	1.11	1.09	0.97
CM015575.1_RaGOO	7950000	40709407	2	3	0.0000	41	40	1.14	1.08	1.01
CM015575.1_RaGOO	8000000	40709407	0	0	0.0000	40	41	1.12	1.11	0.97
CM015575.1_RaGOO	8050000	40709407	1	0	0.0000	39	40	1.08	1.07	0.96
CM015575.1_RaGOO	8100000	40709407	0	0	0.0000	37	39	1.04	1.06	0.94
CM015575.1_RaGOO	8150000	40709407	1	0	0.0000	37	38	1.03	1.02	0.97
CM015575.1_RaGOO	8200000	40709407	0	0	0.0000	43	44	1.21	1.18	0.99
CM015575.1_RaGOO	8250000	40709407	0	0	0.0000	43	42	1.19	1.12	1.03
CM015575.1_RaGOO	8300000	40709407	2	0	0.0000	40	40	1.10	1.07	0.99
CM015575.1_RaGOO	8350000	40709407	0	2	0.0000	37	40	1.03	1.06	0.93
CM015575.1_RaGOO	8400000	40709407	0	3	0.0000	37	39	1.03	1.04	0.95
CM015575.1_RaGOO	8450000	40709407	1	0	0.0000	38	40	1.06	1.07	0.95
CM015575.1_RaGOO	8500000	40709407	0	0	0.0000	39	39	1.08	1.05	0.99
CM015575.1_RaGOO	8550000	40709407	1	0	0.0000	36	39	1.01	1.04	0.93
CM015575.1_RaGOO	8600000	40709407	0	1	0.0000	37	40	1.04	1.07	0.94
CM015575.1_RaGOO	8650000	40709407	0	1	0.0000	38	39	1.05	1.04	0.97
CM015575.1_RaGOO	8700000	40709407	1	1	0.0000	37	40	1.04	1.07	0.93
CM015575.1_RaGOO	8750000	40709407	1	1	0.0000	38	38	1.06	1.03	0.99
CM015575.1_RaGOO	8800000	40709407	0	1	0.0000	34	37	0.94	0.99	0.92
CM015575.1_RaGOO	8850000	40709407	0	1	0.0000	38	41	1.07	1.11	0.93
CM015575.1_RaGOO	8900000	40709407	0	0	0.0000	36	38	1.00	1.02	0.94
CM015575.1_RaGOO	8950000	40709407	0	0	0.0000	39	41	1.08	1.10	0.95
CM015575.1_RaGOO	9000000	40709407	0	0	0.0000	37	39	1.04	1.04	0.96
CM015575.1_RaGOO	9050000	40709407	0	1	0.0000	38	39	1.06	1.05	0.98
CM015575.1_RaGOO	9100000	40709407	0	0	0.0000	36	37	1.00	1.00	0.96
CM015575.1_RaGOO	9150000	40709407	0	0	0.0000	36	37	0.99	0.99	0.97
CM015575.1_RaGOO	9200000	40709407	1	0	0.0000	37	39	1.04	1.05	0.94
CM015575.1_RaGOO	9250000	40709407	0	1	0.0000	38	40	1.06	1.06	0.96
CM015575.1_RaGOO	9300000	40709407	0	0	0.0000	37	40	1.02	1.06	0.93
CM015575.1_RaGOO	9350000	40709407	0	0	0.0000	37	38	1.02	1.02	0.96
CM015575.1_RaGOO	9400000	40709407	0	1	0.0000	40	41	1.11	1.09	0.98
CM015575.1_RaGOO	9450000	40709407	0	12	0.0000	38	39	1.06	1.05	0.97
CM015575.1_RaGOO	9500000	40709407	2	0	0.0000	40	42	1.11	1.13	0.94
CM015575.1_RaGOO	9550000	40709407	2	0	0.0000	37	37	1.02	1.00	0.99
CM015575.1_RaGOO	9600000	40709407	0	0	0.0000	38	39	1.05	1.05	0.96
CM015575.1_RaGOO	9650000	40709407	0	0	0.0000	38	40	1.05	1.07	0.94
CM015575.1_RaGOO	9700000	40709407	1	0	0.0000	39	41	1.10	1.10	0.96
CM015575.1_RaGOO	9750000	40709407	0	0	0.0000	39	40	1.10	1.08	0.98
CM015575.1_RaGOO	9800000	40709407	0	0	0.0000	40	41	1.12	1.09	0.98
CM015575.1_RaGOO	9850000	40709407	0	0	0.0000	38	39	1.05	1.05	0.96
CM015575.1_RaGOO	9900000	40709407	1	2	0.0000	38	40	1.06	1.06	0.96
CM015575.1_RaGOO	9950000	40709407	0	0	0.0000	35	36	0.98	0.96	0.98
CM015575.1_RaGOO	10000000	40709407	0	0	0.0000	38	38	1.05	1.02	0.99
CM015575.1_RaGOO	10050000	40709407	1	4	0.0000	35	38	0.98	1.01	0.93
CM015575.1_RaGOO	10100000	40709407	0	0	0.0000	34	35	0.95	0.94	0.97
CM015575.1_RaGOO	10150000	40709407	0	0	0.0000	36	37	1.00	1.00	0.96
CM015575.1_RaGOO	10200000	40709407	0	0	0.0000	36	38	1.00	1.01	0.95
CM015575.1_RaGOO	10250000	40709407	0	0	0.0000	39	41	1.09	1.11	0.94
CM015575.1_RaGOO	10300000	40709407	0	0	0.0000	37	39	1.03	1.04	0.95
CM015575.1_RaGOO	10350000	40709407	0	0	0.0000	38	39	1.05	1.03	0.98
CM015575.1_RaGOO	10400000	40709407	0	2	0.0196	40	41	1.10	1.09	0.97
CM015575.1_RaGOO	10450000	40709407	0	0	0.0000	34	37	0.95	0.99	0.93
CM015575.1_RaGOO	10500000	40709407	0	0	0.0000	37	39	1.04	1.03	0.97
CM015575.1_RaGOO	10550000	40709407	0	0	0.0000	37	41	1.04	1.09	0.92
CM015575.1_RaGOO	10600000	40709407	0	0	0.0000	37	39	1.02	1.04	0.94
CM015575.1_RaGOO	10650000	40709407	1	1	0.0000	30	33	0.84	0.89	0.91
CM015575.1_RaGOO	10700000	40709407	0	0	0.0000	32	34	0.88	0.92	0.92
CM015575.1_RaGOO	10750000	40709407	0	1	0.0000	36	38	0.99	1.03	0.93
CM015575.1_RaGOO	10800000	40709407	2	0	0.0000	38	39	1.05	1.05	0.96
CM015575.1_RaGOO	10850000	40709407	0	0	0.0000	36	36	1.01	0.97	1.01
CM015575.1_RaGOO	10900000	40709407	3	2	0.0000	39	40	1.08	1.08	0.96
CM015575.1_RaGOO	10950000	40709407	0	0	0.0000	36	38	1.01	1.03	0.95
CM015575.1_RaGOO	11000000	40709407	0	0	0.0000	32	34	0.89	0.91	0.94
CM015575.1_RaGOO	11050000	40709407	0	1	0.0000	37	38	1.04	1.02	0.98
CM015575.1_RaGOO	11100000	40709407	0	1	0.0000	39	40	1.07	1.06	0.97
CM015575.1_RaGOO	11150000	40709407	0	0	0.0000	37	39	1.03	1.04	0.95
CM015575.1_RaGOO	11200000	40709407	0	0	0.0000	38	39	1.06	1.04	0.98
CM015575.1_RaGOO	11250000	40709407	0	1	0.0000	37	39	1.02	1.05	0.94
CM015575.1_RaGOO	11300000	40709407	1	1	0.0000	35	37	0.99	0.98	0.97
CM015575.1_RaGOO	11350000	40709407	0	0	0.0000	34	36	0.95	0.95	0.95
CM015575.1_RaGOO	11400000	40709407	0	0	0.0000	35	36	0.98	0.96	0.98
CM015575.1_RaGOO	11450000	40709407	0	0	0.0000	36	38	0.99	1.01	0.94
CM015575.1_RaGOO	11500000	40709407	1	1	0.0000	37	39	1.04	1.04	0.96
CM015575.1_RaGOO	11550000	40709407	1	0	0.0000	37	39	1.02	1.05	0.94
CM015575.1_RaGOO	11600000	40709407	0	0	0.0000	38	39	1.05	1.05	0.97
CM015575.1_RaGOO	11650000	40709407	0	0	0.0000	37	39	1.02	1.04	0.94
CM015575.1_RaGOO	11700000	40709407	0	0	0.0000	39	40	1.08	1.06	0.98
CM015575.1_RaGOO	11750000	40709407	0	3	0.0000	37	40	1.04	1.07	0.94
CM015575.1_RaGOO	11800000	40709407	1	1	0.0279	39	40	1.08	1.07	0.97
CM015575.1_RaGOO	11850000	40709407	0	0	0.0000	35	37	0.96	0.98	0.94
CM015575.1_RaGOO	11900000	40709407	0	0	0.0000	37	38	1.04	1.03	0.97
CM015575.1_RaGOO	11950000	40709407	0	1	0.0005	38	40	1.06	1.08	0.95
CM015575.1_RaGOO	12000000	40709407	0	0	0.0000	33	36	0.93	0.96	0.93
CM015575.1_RaGOO	12050000	40709407	0	0	0.0000	34	37	0.96	0.99	0.93
CM015575.1_RaGOO	12100000	40709407	1	2	0.0000	32	35	0.89	0.93	0.92
CM015575.1_RaGOO	12150000	40709407	0	0	0.0000	39	40	1.09	1.08	0.97
CM015575.1_RaGOO	12200000	40709407	0	10	0.0200	36	36	1.01	0.98	0.99
CM015575.1_RaGOO	12250000	40709407	2	5	0.0000	35	36	0.97	0.97	0.96
CM015575.1_RaGOO	12300000	40709407	0	1	0.0000	34	36	0.96	0.97	0.95
CM015575.1_RaGOO	12350000	40709407	1	1	0.0000	32	35	0.88	0.93	0.91
CM015575.1_RaGOO	12400000	40709407	1	0	0.0000	33	34	0.92	0.92	0.96
CM015575.1_RaGOO	12450000	40709407	0	0	0.0000	35	36	0.99	0.97	0.98
CM015575.1_RaGOO	12500000	40709407	0	1	0.0000	38	39	1.05	1.04	0.97
CM015575.1_RaGOO	12550000	40709407	0	1	0.0000	37	38	1.04	1.02	0.98
CM015575.1_RaGOO	12600000	40709407	2	0	0.0000	32	34	0.90	0.91	0.95
CM015575.1_RaGOO	12650000	40709407	0	0	0.0000	37	39	1.02	1.03	0.95
CM015575.1_RaGOO	12700000	40709407	3	0	0.0000	36	36	1.00	0.97	0.99
CM015575.1_RaGOO	12750000	40709407	0	0	0.0000	37	38	1.04	1.02	0.98
CM015575.1_RaGOO	12800000	40709407	0	1	0.0000	35	37	0.98	0.99	0.95
CM015575.1_RaGOO	12850000	40709407	0	2	0.0058	37	39	1.03	1.03	0.96
CM015575.1_RaGOO	12900000	40709407	0	0	0.0000	34	36	0.96	0.97	0.95
CM015575.1_RaGOO	12950000	40709407	3	0	0.0000	35	36	0.97	0.96	0.97
CM015575.1_RaGOO	13000000	40709407	0	0	0.0000	36	38	1.00	1.01	0.95
CM015575.1_RaGOO	13050000	40709407	1	2	0.0000	36	37	1.01	1.00	0.97
CM015575.1_RaGOO	13100000	40709407	0	0	0.0000	36	38	1.01	1.01	0.96
CM015575.1_RaGOO	13150000	40709407	1	0	0.0000	36	39	1.00	1.04	0.92
CM015575.1_RaGOO	13200000	40709407	1	1	0.0000	33	34	0.91	0.92	0.95
CM015575.1_RaGOO	13250000	40709407	1	0	0.0027	34	36	0.94	0.97	0.94
CM015575.1_RaGOO	13300000	40709407	4	0	0.0000	32	33	0.89	0.88	0.96
CM015575.1_RaGOO	13350000	40709407	0	7	0.0000	32	35	0.90	0.94	0.92
CM015575.1_RaGOO	13400000	40709407	0	3	0.0000	33	35	0.93	0.93	0.96
CM015575.1_RaGOO	13450000	40709407	0	0	0.0000	34	36	0.95	0.96	0.95
CM015575.1_RaGOO	13500000	40709407	0	0	0.0000	19	21	0.54	0.56	0.93
CM015575.1_RaGOO	13550000	40709407	0	0	0.0000	2	2	0.05	0.05	0.90
CM015575.1_RaGOO	13600000	40709407	3	0	0.0000	20	21	0.57	0.56	0.97
CM015575.1_RaGOO	13650000	40709407	1	0	0.0000	31	33	0.88	0.87	0.96
CM015575.1_RaGOO	13700000	40709407	0	0	0.0000	32	34	0.88	0.92	0.92
CM015575.1_RaGOO	13750000	40709407	6	1	0.0000	31	33	0.87	0.89	0.94
CM015575.1_RaGOO	13800000	40709407	5	1	0.0000	34	35	0.95	0.93	0.98
CM015575.1_RaGOO	13850000	40709407	7	0	0.0000	35	37	0.97	0.98	0.95
CM015575.1_RaGOO	13900000	40709407	0	1	0.0000	35	38	0.96	1.02	0.90
CM015575.1_RaGOO	13950000	40709407	0	1	0.0000	36	38	1.01	1.01	0.96
CM015575.1_RaGOO	14000000	40709407	0	0	0.0000	39	41	1.10	1.08	0.97
CM015575.1_RaGOO	14050000	40709407	2	1	0.0000	37	39	1.04	1.04	0.96
CM015575.1_RaGOO	14100000	40709407	1	0	0.0000	33	35	0.91	0.94	0.93
CM015575.1_RaGOO	14150000	40709407	0	0	0.0000	36	38	1.01	1.02	0.95
CM015575.1_RaGOO	14200000	40709407	0	0	0.0000	39	42	1.10	1.12	0.95
CM015575.1_RaGOO	14250000	40709407	0	0	0.0000	38	39	1.05	1.05	0.96
CM015575.1_RaGOO	14300000	40709407	0	0	0.0000	35	36	0.98	0.97	0.97
CM015575.1_RaGOO	14350000	40709407	4	0	0.0000	32	36	0.90	0.96	0.90
CM015575.1_RaGOO	14400000	40709407	0	4	0.0000	33	35	0.91	0.93	0.95
CM015575.1_RaGOO	14450000	40709407	0	0	0.0000	38	38	1.04	1.02	0.98
CM015575.1_RaGOO	14500000	40709407	2	5	0.0000	38	39	1.06	1.05	0.97
CM015575.1_RaGOO	14550000	40709407	0	1	0.0000	34	36	0.96	0.97	0.95
CM015575.1_RaGOO	14600000	40709407	2	0	0.0000	37	38	1.04	1.02	0.97
CM015575.1_RaGOO	14650000	40709407	0	0	0.0000	38	39	1.05	1.04	0.97
CM015575.1_RaGOO	14700000	40709407	0	2	0.0000	35	36	0.97	0.97	0.96
CM015575.1_RaGOO	14750000	40709407	0	0	0.0000	37	39	1.02	1.04	0.95
CM015575.1_RaGOO	14800000	40709407	1	0	0.0000	37	38	1.04	1.01	0.99
CM015575.1_RaGOO	14850000	40709407	0	0	0.0000	38	39	1.07	1.04	0.99
CM015575.1_RaGOO	14900000	40709407	0	0	0.0000	39	39	1.08	1.04	0.99
CM015575.1_RaGOO	14950000	40709407	0	0	0.0000	35	36	0.97	0.97	0.96
CM015575.1_RaGOO	15000000	40709407	0	0	0.0101	37	39	1.03	1.04	0.96
CM015575.1_RaGOO	15050000	40709407	1	0	0.0000	39	39	1.09	1.03	1.01
CM015575.1_RaGOO	15100000	40709407	1	8	0.0000	18	19	0.50	0.50	0.96
CM015575.1_RaGOO	15150000	40709407	0	0	0.0000	35	37	0.97	1.00	0.94
CM015575.1_RaGOO	15200000	40709407	6	2	0.0000	36	37	1.00	0.99	0.97
CM015575.1_RaGOO	15250000	40709407	0	2	0.0000	39	38	1.07	1.02	1.01
CM015575.1_RaGOO	15300000	40709407	1	0	0.0000	39	40	1.10	1.07	0.98
CM015575.1_RaGOO	15350000	40709407	0	0	0.0000	39	41	1.09	1.10	0.95
CM015575.1_RaGOO	15400000	40709407	0	0	0.0000	32	36	0.90	0.96	0.90
CM015575.1_RaGOO	15450000	40709407	8	0	0.0000	30	33	0.83	0.88	0.91
CM015575.1_RaGOO	15500000	40709407	0	0	0.0000	30	32	0.83	0.85	0.94
CM015575.1_RaGOO	15550000	40709407	0	0	0.0000	30	32	0.83	0.84	0.94
CM015575.1_RaGOO	15600000	40709407	8	3	0.0000	25	29	0.68	0.77	0.86
CM015575.1_RaGOO	15650000	40709407	0	0	0.0000	29	30	0.81	0.80	0.98
CM015575.1_RaGOO	15700000	40709407	0	2	0.0000	21	21	0.58	0.57	0.97
CM015575.1_RaGOO	15750000	40709407	0	0	0.0000	36	37	1.00	0.98	0.98
CM015575.1_RaGOO	15800000	40709407	0	0	0.0000	33	35	0.92	0.94	0.94
CM015575.1_RaGOO	15850000	40709407	0	1	0.0000	33	35	0.92	0.92	0.95
CM015575.1_RaGOO	15900000	40709407	0	0	0.0000	36	37	0.99	0.99	0.96
CM015575.1_RaGOO	15950000	40709407	0	1	0.0000	33	35	0.92	0.94	0.94
CM015575.1_RaGOO	16000000	40709407	1	5	0.0000	33	35	0.92	0.93	0.94
CM015575.1_RaGOO	16050000	40709407	0	0	0.0000	34	37	0.95	0.99	0.93
CM015575.1_RaGOO	16100000	40709407	1	4	0.0000	36	39	1.01	1.03	0.94
CM015575.1_RaGOO	16150000	40709407	0	0	0.0000	37	39	1.03	1.04	0.95
CM015575.1_RaGOO	16200000	40709407	0	0	0.0000	37	38	1.03	1.03	0.96
CM015575.1_RaGOO	16250000	40709407	0	0	0.0000	35	36	0.97	0.98	0.96
CM015575.1_RaGOO	16300000	40709407	0	1	0.0000	35	36	0.98	0.95	0.99
CM015575.1_RaGOO	16350000	40709407	0	2	0.0000	35	36	0.97	0.96	0.97
CM015575.1_RaGOO	16400000	40709407	0	3	0.0000	32	34	0.90	0.90	0.95
CM015575.1_RaGOO	16450000	40709407	0	0	0.0000	36	37	1.00	0.98	0.98
CM015575.1_RaGOO	16500000	40709407	0	0	0.0000	37	39	1.04	1.05	0.96
CM015575.1_RaGOO	16550000	40709407	0	0	0.0000	30	32	0.85	0.84	0.96
CM015575.1_RaGOO	16600000	40709407	0	0	0.0000	21	23	0.60	0.61	0.95
CM015575.1_RaGOO	16650000	40709407	0	1	0.0000	37	39	1.04	1.06	0.94
CM015575.1_RaGOO	16700000	40709407	0	0	0.0000	39	40	1.09	1.08	0.97
CM015575.1_RaGOO	16750000	40709407	1	0	0.0000	37	39	1.03	1.03	0.96
CM015575.1_RaGOO	16800000	40709407	0	1	0.0000	35	37	0.98	0.99	0.95
CM015575.1_RaGOO	16850000	40709407	1	0	0.0000	35	36	0.97	0.97	0.96
CM015575.1_RaGOO	16900000	40709407	0	7	0.0000	30	33	0.84	0.88	0.92
CM015575.1_RaGOO	16950000	40709407	0	0	0.0000	32	34	0.89	0.92	0.93
CM015575.1_RaGOO	17000000	40709407	17	0	0.0000	31	33	0.87	0.88	0.94
CM015575.1_RaGOO	17050000	40709407	1	0	0.0000	30	33	0.85	0.87	0.93
CM015575.1_RaGOO	17100000	40709407	2	0	0.0000	32	34	0.90	0.92	0.94
CM015575.1_RaGOO	17150000	40709407	0	0	0.0000	33	36	0.92	0.96	0.93
CM015575.1_RaGOO	17200000	40709407	0	0	0.0000	36	39	1.01	1.05	0.93
CM015575.1_RaGOO	17250000	40709407	13	0	0.0000	37	38	1.02	1.02	0.96
CM015575.1_RaGOO	17300000	40709407	0	0	0.0000	38	39	1.06	1.05	0.98
CM015575.1_RaGOO	17350000	40709407	0	0	0.0000	37	40	1.04	1.08	0.93
CM015575.1_RaGOO	17400000	40709407	0	0	0.0000	37	39	1.02	1.03	0.95
CM015575.1_RaGOO	17450000	40709407	0	0	0.0000	37	39	1.03	1.05	0.94
CM015575.1_RaGOO	17500000	40709407	0	0	0.0000	35	38	0.98	1.01	0.93
CM015575.1_RaGOO	17550000	40709407	0	0	0.0000	39	41	1.10	1.10	0.96
CM015575.1_RaGOO	17600000	40709407	1	0	0.0000	38	39	1.05	1.03	0.98
CM015575.1_RaGOO	17650000	40709407	0	0	0.0000	37	38	1.02	1.03	0.96
CM015575.1_RaGOO	17700000	40709407	0	0	0.0000	35	35	0.98	0.95	1.00
CM015575.1_RaGOO	17750000	40709407	0	3	0.0000	37	38	1.03	1.02	0.97
CM015575.1_RaGOO	17800000	40709407	0	0	0.0000	36	37	1.00	0.98	0.98
CM015575.1_RaGOO	17850000	40709407	0	0	0.0000	36	37	1.00	0.99	0.97
CM015575.1_RaGOO	17900000	40709407	0	0	0.0000	38	40	1.07	1.08	0.95
CM015575.1_RaGOO	17950000	40709407	0	0	0.0000	37	39	1.04	1.04	0.95
CM015575.1_RaGOO	18000000	40709407	0	1	0.0000	36	38	0.99	1.02	0.93
CM015575.1_RaGOO	18050000	40709407	0	3	0.0000	35	37	0.97	0.99	0.94
CM015575.1_RaGOO	18100000	40709407	12	0	0.0000	34	35	0.95	0.95	0.96
CM015575.1_RaGOO	18150000	40709407	0	0	0.0000	35	37	0.96	1.00	0.93
CM015575.1_RaGOO	18200000	40709407	0	4	0.0000	34	35	0.94	0.95	0.96
CM015575.1_RaGOO	18250000	40709407	0	0	0.0000	36	39	1.01	1.04	0.93
CM015575.1_RaGOO	18300000	40709407	0	6	0.0000	29	31	0.80	0.84	0.92
CM015575.1_RaGOO	18350000	40709407	0	0	0.0000	36	37	0.99	0.98	0.97
CM015575.1_RaGOO	18400000	40709407	1	0	0.0000	31	33	0.85	0.88	0.93
CM015575.1_RaGOO	18450000	40709407	0	2	0.0000	33	34	0.91	0.91	0.96
CM015575.1_RaGOO	18500000	40709407	0	0	0.0000	47	50	1.30	1.35	0.93
CM015575.1_RaGOO	18550000	40709407	0	0	0.0000	34	35	0.95	0.95	0.96
CM015575.1_RaGOO	18600000	40709407	0	1	0.0000	31	34	0.87	0.92	0.91
CM015575.1_RaGOO	18650000	40709407	0	0	0.0000	38	40	1.07	1.07	0.96
CM015575.1_RaGOO	18700000	40709407	2	7	0.0000	38	40	1.06	1.07	0.96
CM015575.1_RaGOO	18750000	40709407	2	0	0.0000	40	41	1.10	1.09	0.97
CM015575.1_RaGOO	18800000	40709407	0	0	0.0000	33	36	0.92	0.96	0.93
CM015575.1_RaGOO	18850000	40709407	0	0	0.0000	35	38	0.98	1.01	0.94
CM015575.1_RaGOO	18900000	40709407	1	0	0.0000	33	34	0.91	0.91	0.96
CM015575.1_RaGOO	18950000	40709407	2	0	0.0000	33	35	0.91	0.93	0.93
CM015575.1_RaGOO	19000000	40709407	2	4	0.0000	34	35	0.93	0.94	0.95
CM015575.1_RaGOO	19050000	40709407	0	0	0.0000	32	34	0.89	0.92	0.93
CM015575.1_RaGOO	19100000	40709407	0	1	0.0000	33	34	0.92	0.92	0.96
CM015575.1_RaGOO	19150000	40709407	0	1	0.0000	37	38	1.02	1.03	0.95
CM015575.1_RaGOO	19200000	40709407	1	0	0.0000	34	36	0.95	0.97	0.94
CM015575.1_RaGOO	19250000	40709407	0	0	0.0000	35	37	0.97	0.99	0.95
CM015575.1_RaGOO	19300000	40709407	1	0	0.0000	35	37	0.97	0.98	0.95
CM015575.1_RaGOO	19350000	40709407	0	0	0.0000	31	33	0.87	0.88	0.95
CM015575.1_RaGOO	19400000	40709407	0	0	0.0000	31	33	0.86	0.87	0.94
CM015575.1_RaGOO	19450000	40709407	1	0	0.0000	31	32	0.87	0.86	0.97
CM015575.1_RaGOO	19500000	40709407	0	3	0.0000	31	32	0.87	0.85	0.99
CM015575.1_RaGOO	19550000	40709407	0	0	0.0111	35	36	0.97	0.96	0.96
CM015575.1_RaGOO	19600000	40709407	0	0	0.0000	35	36	0.97	0.96	0.97
CM015575.1_RaGOO	19650000	40709407	2	2	0.0000	29	30	0.81	0.80	0.97
CM015575.1_RaGOO	19700000	40709407	0	0	0.0000	29	29	0.80	0.78	0.98
CM015575.1_RaGOO	19750000	40709407	8	0	0.0000	32	33	0.89	0.89	0.96
CM015575.1_RaGOO	19800000	40709407	0	0	0.0000	37	37	1.03	0.99	1.00
CM015575.1_RaGOO	19850000	40709407	0	0	0.0000	28	27	0.77	0.73	1.01
CM015575.1_RaGOO	19900000	40709407	0	1	0.0000	31	33	0.87	0.87	0.96
CM015575.1_RaGOO	19950000	40709407	2	0	0.0000	41	44	1.15	1.19	0.93
CM015575.1_RaGOO	20000000	40709407	0	0	0.0000	33	34	0.92	0.92	0.96
CM015575.1_RaGOO	20050000	40709407	2	2	0.0000	32	35	0.90	0.93	0.93
CM015575.1_RaGOO	20100000	40709407	0	2	0.0000	34	36	0.95	0.96	0.95
CM015575.1_RaGOO	20150000	40709407	0	2	0.0000	32	34	0.90	0.91	0.95
CM015575.1_RaGOO	20200000	40709407	3	0	0.0000	31	34	0.86	0.90	0.92
CM015575.1_RaGOO	20250000	40709407	0	0	0.0000	33	34	0.92	0.92	0.96
CM015575.1_RaGOO	20300000	40709407	2	1	0.0000	35	38	0.98	1.01	0.94
CM015575.1_RaGOO	20350000	40709407	0	0	0.0000	28	31	0.77	0.84	0.89
CM015575.1_RaGOO	20400000	40709407	3	0	0.0000	27	30	0.75	0.81	0.90
CM015575.1_RaGOO	20450000	40709407	1	1	0.0000	29	32	0.81	0.85	0.92
CM015575.1_RaGOO	20500000	40709407	0	0	0.0000	33	35	0.91	0.94	0.93
CM015575.1_RaGOO	20550000	40709407	2	0	0.0000	29	31	0.80	0.84	0.92
CM015575.1_RaGOO	20600000	40709407	3	2	0.0000	31	33	0.85	0.87	0.94
CM015575.1_RaGOO	20650000	40709407	0	2	0.0000	34	36	0.94	0.96	0.94
CM015575.1_RaGOO	20700000	40709407	4	0	0.0000	33	35	0.91	0.93	0.93
CM015575.1_RaGOO	20750000	40709407	0	1	0.0000	34	36	0.94	0.96	0.95
CM015575.1_RaGOO	20800000	40709407	1	0	0.0000	31	33	0.88	0.88	0.95
CM015575.1_RaGOO	20850000	40709407	0	0	0.0000	31	32	0.85	0.87	0.94
CM015575.1_RaGOO	20900000	40709407	0	0	0.0000	31	33	0.87	0.89	0.93
CM015575.1_RaGOO	20950000	40709407	1	4	0.0000	37	39	1.02	1.04	0.94
CM015575.1_RaGOO	21000000	40709407	3	0	0.0000	34	36	0.94	0.95	0.95
CM015575.1_RaGOO	21050000	40709407	0	0	0.0000	34	36	0.96	0.97	0.95
CM015575.1_RaGOO	21100000	40709407	3	0	0.0000	32	33	0.88	0.90	0.94
CM015575.1_RaGOO	21150000	40709407	1	5	0.0000	33	35	0.93	0.94	0.95
CM015575.1_RaGOO	21200000	40709407	2	1	0.0000	36	39	0.99	1.04	0.92
CM015575.1_RaGOO	21250000	40709407	2	1	0.0000	32	35	0.90	0.92	0.94
CM015575.1_RaGOO	21300000	40709407	0	1	0.0000	36	37	1.00	0.98	0.97
CM015575.1_RaGOO	21350000	40709407	0	1	0.0000	33	34	0.91	0.92	0.95
CM015575.1_RaGOO	21400000	40709407	1	3	0.0000	36	37	1.00	0.98	0.98
CM015575.1_RaGOO	21450000	40709407	4	24	0.0000	34	36	0.94	0.96	0.94
CM015575.1_RaGOO	21500000	40709407	2	1	0.0000	33	35	0.91	0.93	0.94
CM015575.1_RaGOO	21550000	40709407	0	1	0.0000	35	38	0.99	1.01	0.94
CM015575.1_RaGOO	21600000	40709407	8	2	0.0000	36	39	1.01	1.04	0.94
CM015575.1_RaGOO	21650000	40709407	1	5	0.0000	36	37	1.01	0.99	0.97
CM015575.1_RaGOO	21700000	40709407	1	0	0.0000	37	38	1.02	1.00	0.98
CM015575.1_RaGOO	21750000	40709407	0	0	0.0000	38	38	1.05	1.02	0.99
CM015575.1_RaGOO	21800000	40709407	1	0	0.0000	37	39	1.02	1.05	0.93
CM015575.1_RaGOO	21850000	40709407	0	0	0.0000	34	37	0.96	1.00	0.92
CM015575.1_RaGOO	21900000	40709407	1	0	0.0000	34	36	0.95	0.97	0.94
CM015575.1_RaGOO	21950000	40709407	0	5	0.0000	34	36	0.96	0.95	0.97
CM015575.1_RaGOO	22000000	40709407	0	0	0.0000	33	36	0.92	0.97	0.91
CM015575.1_RaGOO	22050000	40709407	2	0	0.0000	36	38	0.99	1.01	0.94
CM015575.1_RaGOO	22100000	40709407	1	0	0.0000	34	36	0.94	0.95	0.95
CM015575.1_RaGOO	22150000	40709407	0	0	0.0000	34	35	0.96	0.94	0.98
CM015575.1_RaGOO	22200000	40709407	1	0	0.0000	39	40	1.08	1.08	0.96
CM015575.1_RaGOO	22250000	40709407	1	0	0.0000	39	38	1.07	1.02	1.01
CM015575.1_RaGOO	22300000	40709407	0	0	0.0000	37	38	1.04	1.03	0.97
CM015575.1_RaGOO	22350000	40709407	0	0	0.0000	35	36	0.98	0.97	0.96
CM015575.1_RaGOO	22400000	40709407	3	1	0.0000	25	27	0.71	0.72	0.95
CM015575.1_RaGOO	22450000	40709407	0	0	0.0000	34	35	0.94	0.94	0.96
CM015575.1_RaGOO	22500000	40709407	0	0	0.0000	37	39	1.03	1.03	0.96
CM015575.1_RaGOO	22550000	40709407	0	0	0.0000	37	39	1.03	1.04	0.96
CM015575.1_RaGOO	22600000	40709407	0	0	0.0000	35	37	0.96	0.98	0.94
CM015575.1_RaGOO	22650000	40709407	0	0	0.0000	37	38	1.03	1.03	0.96
CM015575.1_RaGOO	22700000	40709407	0	0	0.0000	39	41	1.10	1.10	0.96
CM015575.1_RaGOO	22750000	40709407	0	0	0.0000	37	39	1.03	1.05	0.95
CM015575.1_RaGOO	22800000	40709407	0	0	0.0000	34	36	0.96	0.97	0.95
CM015575.1_RaGOO	22850000	40709407	0	1	0.0000	31	33	0.86	0.88	0.95
CM015575.1_RaGOO	22900000	40709407	0	2	0.0000	40	41	1.11	1.11	0.97
CM015575.1_RaGOO	22950000	40709407	0	0	0.0000	40	41	1.11	1.09	0.97
CM015575.1_RaGOO	23000000	40709407	3	0	0.0032	38	39	1.06	1.05	0.96
CM015575.1_RaGOO	23050000	40709407	3	0	0.0000	36	38	0.99	1.01	0.94
CM015575.1_RaGOO	23100000	40709407	0	3	0.0000	38	38	1.06	1.02	0.99
CM015575.1_RaGOO	23150000	40709407	0	0	0.0000	34	37	0.96	0.98	0.94
CM015575.1_RaGOO	23200000	40709407	0	1	0.0000	35	38	0.98	1.01	0.94
CM015575.1_RaGOO	23250000	40709407	1	0	0.0000	37	39	1.03	1.03	0.96
CM015575.1_RaGOO	23300000	40709407	1	4	0.0000	39	41	1.09	1.08	0.97
CM015575.1_RaGOO	23350000	40709407	14	3	0.0000	31	34	0.88	0.92	0.92
CM015575.1_RaGOO	23400000	40709407	1	0	0.0000	39	41	1.08	1.10	0.94
CM015575.1_RaGOO	23450000	40709407	0	0	0.0000	36	37	1.01	0.99	0.98
CM015575.1_RaGOO	23500000	40709407	0	0	0.0000	38	40	1.06	1.07	0.95
CM015575.1_RaGOO	23550000	40709407	0	0	0.0000	37	39	1.02	1.04	0.94
CM015575.1_RaGOO	23600000	40709407	4	0	0.0000	38	38	1.05	1.02	0.99
CM015575.1_RaGOO	23650000	40709407	0	1	0.0000	36	38	1.01	1.01	0.96
CM015575.1_RaGOO	23700000	40709407	1	0	0.0000	35	38	0.99	1.02	0.94
CM015575.1_RaGOO	23750000	40709407	1	3	0.0000	38	40	1.07	1.07	0.97
CM015575.1_RaGOO	23800000	40709407	2	1	0.0000	38	40	1.06	1.06	0.96
CM015575.1_RaGOO	23850000	40709407	3	2	0.0000	37	39	1.03	1.05	0.94
CM015575.1_RaGOO	23900000	40709407	3	0	0.0000	37	38	1.03	1.02	0.97
CM015575.1_RaGOO	23950000	40709407	0	0	0.0000	50	52	1.40	1.39	0.97
CM015575.1_RaGOO	24000000	40709407	0	0	0.0000	41	42	1.15	1.12	0.98
CM015575.1_RaGOO	24050000	40709407	0	1	0.0000	38	39	1.06	1.05	0.97
CM015575.1_RaGOO	24100000	40709407	0	0	0.0000	36	37	1.01	1.00	0.97
CM015575.1_RaGOO	24150000	40709407	0	2	0.0000	41	41	1.14	1.09	1.00
CM015575.1_RaGOO	24200000	40709407	0	2	0.0086	38	39	1.07	1.05	0.97
CM015575.1_RaGOO	24250000	40709407	0	1	0.0000	40	42	1.11	1.13	0.94
CM015575.1_RaGOO	24300000	40709407	0	5	0.0000	37	38	1.04	1.01	0.99
CM015575.1_RaGOO	24350000	40709407	4	0	0.0000	34	36	0.95	0.98	0.94
CM015575.1_RaGOO	24400000	40709407	0	1	0.0000	35	37	0.99	0.99	0.96
CM015575.1_RaGOO	24450000	40709407	0	0	0.0000	33	34	0.93	0.92	0.97
CM015575.1_RaGOO	24500000	40709407	0	0	0.0000	33	35	0.93	0.93	0.96
CM015575.1_RaGOO	24550000	40709407	0	2	0.0000	32	35	0.89	0.95	0.90
CM015575.1_RaGOO	24600000	40709407	0	0	0.0000	34	35	0.95	0.95	0.96
CM015575.1_RaGOO	24650000	40709407	0	1	0.0000	36	36	1.01	0.96	1.00
CM015575.1_RaGOO	24700000	40709407	0	7	0.0000	33	36	0.93	0.95	0.93
CM015575.1_RaGOO	24750000	40709407	0	3	0.0000	36	37	1.00	1.00	0.96
CM015575.1_RaGOO	24800000	40709407	0	1	0.0000	31	34	0.86	0.90	0.92
CM015575.1_RaGOO	24850000	40709407	0	1	0.0000	35	36	0.97	0.96	0.97
CM015575.1_RaGOO	24900000	40709407	0	0	0.0000	35	38	0.99	1.01	0.94
CM015575.1_RaGOO	24950000	40709407	1	0	0.0000	33	34	0.91	0.91	0.96
CM015575.1_RaGOO	25000000	40709407	0	0	0.0000	38	39	1.05	1.04	0.97
CM015575.1_RaGOO	25050000	40709407	1	0	0.0000	29	32	0.82	0.85	0.93
CM015575.1_RaGOO	25100000	40709407	0	0	0.0000	32	35	0.90	0.92	0.94
CM015575.1_RaGOO	25150000	40709407	0	0	0.0000	32	34	0.89	0.91	0.94
CM015575.1_RaGOO	25200000	40709407	0	1	0.0000	30	33	0.84	0.88	0.92
CM015575.1_RaGOO	25250000	40709407	1	0	0.0000	35	36	0.97	0.97	0.96
CM015575.1_RaGOO	25300000	40709407	2	0	0.0000	32	33	0.88	0.89	0.96
CM015575.1_RaGOO	25350000	40709407	0	0	0.0000	32	35	0.89	0.94	0.91
CM015575.1_RaGOO	25400000	40709407	8	0	0.0033	36	38	0.99	1.03	0.93
CM015575.1_RaGOO	25450000	40709407	0	2	0.0000	35	37	0.98	0.99	0.95
CM015575.1_RaGOO	25500000	40709407	0	1	0.0000	35	38	0.97	1.01	0.92
CM015575.1_RaGOO	25550000	40709407	3	0	0.0000	38	39	1.07	1.04	0.98
CM015575.1_RaGOO	25600000	40709407	0	0	0.0000	36	38	1.01	1.01	0.96
CM015575.1_RaGOO	25650000	40709407	2	0	0.0000	35	37	0.98	0.99	0.96
CM015575.1_RaGOO	25700000	40709407	0	1	0.0000	36	38	1.01	1.02	0.96
CM015575.1_RaGOO	25750000	40709407	0	1	0.0000	38	40	1.05	1.06	0.96
CM015575.1_RaGOO	25800000	40709407	0	2	0.0000	34	36	0.95	0.96	0.95
CM015575.1_RaGOO	25850000	40709407	2	4	0.0000	33	35	0.91	0.93	0.93
CM015575.1_RaGOO	25900000	40709407	1	1	0.0000	39	40	1.09	1.08	0.98
CM015575.1_RaGOO	25950000	40709407	0	0	0.0000	40	40	1.10	1.08	0.98
CM015575.1_RaGOO	26000000	40709407	0	5	0.0000	36	39	1.01	1.03	0.94
CM015575.1_RaGOO	26050000	40709407	8	0	0.0106	41	41	1.13	1.11	0.98
CM015575.1_RaGOO	26100000	40709407	9	3	0.0009	34	36	0.96	0.98	0.94
CM015575.1_RaGOO	26150000	40709407	1	0	0.0000	36	37	1.01	0.98	0.99
CM015575.1_RaGOO	26200000	40709407	0	0	0.0000	34	35	0.95	0.95	0.96
CM015575.1_RaGOO	26250000	40709407	0	0	0.0000	36	38	1.00	1.03	0.94
CM015575.1_RaGOO	26300000	40709407	0	0	0.0000	34	35	0.94	0.94	0.96
CM015575.1_RaGOO	26350000	40709407	0	2	0.0000	30	31	0.84	0.84	0.97
CM015575.1_RaGOO	26400000	40709407	0	6	0.0000	31	34	0.85	0.90	0.91
CM015575.1_RaGOO	26450000	40709407	4	1	0.0000	30	31	0.84	0.84	0.97
CM015575.1_RaGOO	26500000	40709407	0	0	0.0000	36	37	1.00	0.99	0.97
CM015575.1_RaGOO	26550000	40709407	0	0	0.0000	37	38	1.03	1.02	0.97
CM015575.1_RaGOO	26600000	40709407	1	0	0.0146	38	40	1.07	1.06	0.97
CM015575.1_RaGOO	26650000	40709407	2	6	0.0064	39	39	1.09	1.03	1.02
CM015575.1_RaGOO	26700000	40709407	7	0	0.0000	39	40	1.10	1.06	1.00
CM015575.1_RaGOO	26750000	40709407	0	4	0.0000	39	39	1.08	1.04	0.99
CM015575.1_RaGOO	26800000	40709407	0	0	0.0000	37	38	1.02	1.03	0.96
CM015575.1_RaGOO	26850000	40709407	2	2	0.0000	31	33	0.87	0.89	0.95
CM015575.1_RaGOO	26900000	40709407	6	0	0.0000	33	35	0.92	0.94	0.94
CM015575.1_RaGOO	26950000	40709407	0	0	0.0000	35	37	0.96	0.99	0.93
CM015575.1_RaGOO	27000000	40709407	0	0	0.0000	36	37	1.01	1.00	0.97
CM015575.1_RaGOO	27050000	40709407	0	2	0.0082	33	35	0.91	0.94	0.93
CM015575.1_RaGOO	27100000	40709407	0	0	0.0000	37	38	1.03	1.02	0.97
CM015575.1_RaGOO	27150000	40709407	0	1	0.0000	36	39	1.00	1.03	0.93
CM015575.1_RaGOO	27200000	40709407	0	1	0.0000	33	36	0.91	0.95	0.91
CM015575.1_RaGOO	27250000	40709407	0	0	0.0000	36	37	1.01	0.99	0.98
CM015575.1_RaGOO	27300000	40709407	0	0	0.0000	38	39	1.06	1.05	0.97
CM015575.1_RaGOO	27350000	40709407	1	2	0.0000	39	40	1.09	1.08	0.97
CM015575.1_RaGOO	27400000	40709407	0	1	0.0000	36	36	1.01	0.96	1.01
CM015575.1_RaGOO	27450000	40709407	0	0	0.0000	34	35	0.94	0.94	0.96
CM015575.1_RaGOO	27500000	40709407	1	0	0.0000	37	40	1.04	1.08	0.93
CM015575.1_RaGOO	27550000	40709407	1	1	0.0032	37	38	1.04	1.03	0.98
CM015575.1_RaGOO	27600000	40709407	0	1	0.0000	37	37	1.03	0.99	1.00
CM015575.1_RaGOO	27650000	40709407	0	0	0.0000	38	37	1.05	1.00	1.00
CM015575.1_RaGOO	27700000	40709407	0	0	0.0000	42	42	1.17	1.14	0.99
CM015575.1_RaGOO	27750000	40709407	0	0	0.0000	38	37	1.05	1.00	1.01
CM015575.1_RaGOO	27800000	40709407	0	0	0.0000	37	39	1.03	1.05	0.95
CM015575.1_RaGOO	27850000	40709407	1	0	0.0000	37	38	1.04	1.02	0.98
CM015575.1_RaGOO	27900000	40709407	0	1	0.0000	35	37	0.97	0.99	0.94
CM015575.1_RaGOO	27950000	40709407	1	0	0.0000	36	37	1.00	1.00	0.96
CM015575.1_RaGOO	28000000	40709407	1	1	0.0000	36	36	0.99	0.97	0.99
CM015575.1_RaGOO	28050000	40709407	0	0	0.0000	37	38	1.02	1.03	0.95
CM015575.1_RaGOO	28100000	40709407	1	0	0.0000	42	43	1.16	1.15	0.97
CM015575.1_RaGOO	28150000	40709407	0	0	0.0000	41	42	1.14	1.12	0.98
CM015575.1_RaGOO	28200000	40709407	4	0	0.0000	36	38	1.00	1.02	0.94
CM015575.1_RaGOO	28250000	40709407	0	0	0.0000	40	42	1.12	1.11	0.97
CM015575.1_RaGOO	28300000	40709407	3	0	0.0000	40	40	1.12	1.08	0.99
CM015575.1_RaGOO	28350000	40709407	0	1	0.0000	43	43	1.20	1.14	1.01
CM015575.1_RaGOO	28400000	40709407	0	0	0.0000	42	43	1.17	1.15	0.98
CM015575.1_RaGOO	28450000	40709407	0	0	0.0000	41	40	1.14	1.08	1.02
CM015575.1_RaGOO	28500000	40709407	1	0	0.0000	39	40	1.08	1.07	0.97
CM015575.1_RaGOO	28550000	40709407	2	0	0.0000	51	57	1.42	1.53	0.89
CM015575.1_RaGOO	28600000	40709407	0	2	0.0000	65	69	1.82	1.86	0.94
CM015575.1_RaGOO	28650000	40709407	0	1	0.0000	37	39	1.04	1.05	0.95
CM015575.1_RaGOO	28700000	40709407	0	0	0.0000	38	39	1.07	1.04	0.98
CM015575.1_RaGOO	28750000	40709407	0	8	0.0000	36	37	1.00	0.99	0.97
CM015575.1_RaGOO	28800000	40709407	0	0	0.0000	34	36	0.96	0.96	0.96
CM015575.1_RaGOO	28850000	40709407	1	0	0.0000	34	36	0.96	0.96	0.96
CM015575.1_RaGOO	28900000	40709407	0	1	0.0000	36	39	1.01	1.04	0.94
CM015575.1_RaGOO	28950000	40709407	1	4	0.0000	36	38	1.01	1.03	0.94
CM015575.1_RaGOO	29000000	40709407	9	0	0.0000	34	37	0.94	1.00	0.90
CM015575.1_RaGOO	29050000	40709407	1	0	0.0000	31	34	0.87	0.92	0.91
CM015575.1_RaGOO	29100000	40709407	0	0	0.0000	35	36	0.99	0.96	0.99
CM015575.1_RaGOO	29150000	40709407	3	1	0.0000	31	34	0.88	0.91	0.93
CM015575.1_RaGOO	29200000	40709407	0	0	0.0000	43	44	1.20	1.19	0.97
CM015575.1_RaGOO	29250000	40709407	0	0	0.0000	34	35	0.94	0.94	0.96
CM015575.1_RaGOO	29300000	40709407	0	0	0.0000	32	35	0.90	0.92	0.93
CM015575.1_RaGOO	29350000	40709407	0	0	0.0000	32	34	0.88	0.91	0.93
CM015575.1_RaGOO	29400000	40709407	0	1	0.0000	32	34	0.89	0.92	0.93
CM015575.1_RaGOO	29450000	40709407	1	0	0.0000	36	38	1.00	1.02	0.95
CM015575.1_RaGOO	29500000	40709407	1	0	0.0000	37	40	1.02	1.08	0.91
CM015575.1_RaGOO	29550000	40709407	0	0	0.0000	34	35	0.95	0.94	0.97
CM015575.1_RaGOO	29600000	40709407	0	1	0.0000	34	36	0.96	0.97	0.95
CM015575.1_RaGOO	29650000	40709407	0	0	0.0000	35	38	0.98	1.01	0.94
CM015575.1_RaGOO	29700000	40709407	1	0	0.0000	31	33	0.85	0.88	0.93
CM015575.1_RaGOO	29750000	40709407	1	2	0.0000	32	33	0.88	0.88	0.97
CM015575.1_RaGOO	29800000	40709407	1	3	0.0000	41	43	1.15	1.15	0.96
CM015575.1_RaGOO	29850000	40709407	0	1	0.0000	30	33	0.83	0.87	0.92
CM015575.1_RaGOO	29900000	40709407	0	2	0.0000	30	33	0.85	0.89	0.92
CM015575.1_RaGOO	29950000	40709407	0	2	0.0000	32	34	0.90	0.92	0.95
CM015575.1_RaGOO	30000000	40709407	0	0	0.0000	31	35	0.87	0.94	0.89
CM015575.1_RaGOO	30050000	40709407	0	0	0.0000	28	30	0.77	0.81	0.92
CM015575.1_RaGOO	30100000	40709407	0	0	0.0000	36	38	0.99	1.01	0.95
CM015575.1_RaGOO	30150000	40709407	0	0	0.0000	30	32	0.84	0.85	0.95
CM015575.1_RaGOO	30200000	40709407	0	0	0.0000	31	34	0.85	0.91	0.90
CM015575.1_RaGOO	30250000	40709407	0	0	0.0000	32	34	0.88	0.91	0.93
CM015575.1_RaGOO	30300000	40709407	1	2	0.0000	31	33	0.88	0.89	0.95
CM015575.1_RaGOO	30350000	40709407	0	17	0.0000	35	36	0.97	0.97	0.96
CM015575.1_RaGOO	30400000	40709407	0	4	0.0000	28	29	0.77	0.78	0.94
CM015575.1_RaGOO	30450000	40709407	0	1	0.0000	19	20	0.53	0.53	0.95
CM015575.1_RaGOO	30500000	40709407	0	0	0.0000	36	38	1.01	1.01	0.96
CM015575.1_RaGOO	30550000	40709407	0	0	0.0000	39	41	1.09	1.09	0.97
CM015575.1_RaGOO	30600000	40709407	0	0	0.0000	35	37	0.97	0.98	0.95
CM015575.1_RaGOO	30650000	40709407	0	0	0.0000	35	36	0.97	0.95	0.98
CM015575.1_RaGOO	30700000	40709407	0	0	0.0000	38	39	1.05	1.05	0.96
CM015575.1_RaGOO	30750000	40709407	0	0	0.0000	42	43	1.16	1.15	0.97
CM015575.1_RaGOO	30800000	40709407	0	0	0.0000	37	40	1.03	1.07	0.92
CM015575.1_RaGOO	30850000	40709407	1	0	0.0000	36	38	1.01	1.01	0.96
CM015575.1_RaGOO	30900000	40709407	0	0	0.0000	41	42	1.15	1.14	0.97
CM015575.1_RaGOO	30950000	40709407	0	0	0.0000	36	37	1.00	1.00	0.96
CM015575.1_RaGOO	31000000	40709407	0	1	0.0000	35	36	0.96	0.97	0.96
CM015575.1_RaGOO	31050000	40709407	0	0	0.0000	36	38	1.01	1.01	0.96
CM015575.1_RaGOO	31100000	40709407	1	0	0.0000	34	37	0.95	0.99	0.92
CM015575.1_RaGOO	31150000	40709407	0	0	0.0000	33	35	0.92	0.93	0.95
CM015575.1_RaGOO	31200000	40709407	2	0	0.0000	35	41	0.97	1.09	0.86
CM015575.1_RaGOO	31250000	40709407	0	0	0.0000	31	32	0.86	0.85	0.97
CM015575.1_RaGOO	31300000	40709407	0	1	0.0000	34	35	0.94	0.94	0.97
CM015575.1_RaGOO	31350000	40709407	2	0	0.0000	31	33	0.87	0.88	0.95
CM015575.1_RaGOO	31400000	40709407	0	0	0.0000	34	36	0.95	0.95	0.96
CM015575.1_RaGOO	31450000	40709407	0	0	0.0000	33	35	0.91	0.93	0.94
CM015575.1_RaGOO	31500000	40709407	0	0	0.0000	32	33	0.89	0.90	0.95
CM015575.1_RaGOO	31550000	40709407	0	0	0.0000	35	37	0.99	1.00	0.95
CM015575.1_RaGOO	31600000	40709407	0	0	0.0000	35	38	0.99	1.02	0.93
CM015575.1_RaGOO	31650000	40709407	0	3	0.0000	34	36	0.94	0.97	0.94
CM015575.1_RaGOO	31700000	40709407	0	1	0.0000	16	18	0.45	0.49	0.88
CM015575.1_RaGOO	31750000	40709407	0	2	0.0000	33	34	0.91	0.90	0.97
CM015575.1_RaGOO	31800000	40709407	0	0	0.0000	39	41	1.09	1.09	0.96
CM015575.1_RaGOO	31850000	40709407	0	0	0.0000	35	37	0.98	1.00	0.94
CM015575.1_RaGOO	31900000	40709407	0	0	0.0000	36	37	1.01	0.98	0.99
CM015575.1_RaGOO	31950000	40709407	0	1	0.0000	40	42	1.11	1.11	0.96
CM015575.1_RaGOO	32000000	40709407	1	0	0.0000	40	42	1.12	1.13	0.95
CM015575.1_RaGOO	32050000	40709407	0	0	0.0000	39	39	1.09	1.05	1.00
CM015575.1_RaGOO	32100000	40709407	0	0	0.0000	35	38	0.98	1.01	0.94
CM015575.1_RaGOO	32150000	40709407	0	0	0.0000	37	39	1.03	1.03	0.96
CM015575.1_RaGOO	32200000	40709407	0	0	0.0000	38	40	1.07	1.07	0.96
CM015575.1_RaGOO	32250000	40709407	0	5	0.0000	37	40	1.04	1.07	0.93
CM015575.1_RaGOO	32300000	40709407	3	0	0.0000	41	42	1.13	1.13	0.96
CM015575.1_RaGOO	32350000	40709407	1	0	0.0000	39	40	1.08	1.08	0.97
CM015575.1_RaGOO	32400000	40709407	0	1	0.0000	38	40	1.07	1.06	0.96
CM015575.1_RaGOO	32450000	40709407	0	0	0.0000	38	38	1.05	1.03	0.98
CM015575.1_RaGOO	32500000	40709407	0	0	0.0000	38	39	1.05	1.05	0.96
CM015575.1_RaGOO	32550000	40709407	0	0	0.0000	41	41	1.13	1.11	0.98
CM015575.1_RaGOO	32600000	40709407	0	0	0.0000	40	41	1.11	1.10	0.98
CM015575.1_RaGOO	32650000	40709407	0	3	0.0000	37	38	1.02	1.02	0.96
CM015575.1_RaGOO	32700000	40709407	0	0	0.0000	35	38	0.98	1.02	0.92
CM015575.1_RaGOO	32750000	40709407	0	1	0.0000	35	37	0.99	1.00	0.95
CM015575.1_RaGOO	32800000	40709407	0	0	0.0000	32	33	0.89	0.88	0.97
CM015575.1_RaGOO	32850000	40709407	0	1	0.0000	41	42	1.14	1.13	0.97
CM015575.1_RaGOO	32900000	40709407	0	1	0.0000	37	39	1.04	1.04	0.97
CM015575.1_RaGOO	32950000	40709407	0	1	0.0000	41	43	1.15	1.14	0.97
CM015575.1_RaGOO	33000000	40709407	1	0	0.0000	36	39	1.00	1.03	0.94
CM015575.1_RaGOO	33050000	40709407	1	0	0.0000	37	39	1.02	1.04	0.95
CM015575.1_RaGOO	33100000	40709407	0	0	0.0000	36	37	1.01	0.99	0.98
CM015575.1_RaGOO	33150000	40709407	0	0	0.0000	37	39	1.02	1.04	0.95
CM015575.1_RaGOO	33200000	40709407	1	2	0.0000	36	36	1.01	0.98	0.99
CM015575.1_RaGOO	33250000	40709407	0	0	0.0000	40	40	1.10	1.08	0.98
CM015575.1_RaGOO	33300000	40709407	3	0	0.0000	34	38	0.96	1.01	0.91
CM015575.1_RaGOO	33350000	40709407	0	0	0.0000	35	39	0.97	1.04	0.90
CM015575.1_RaGOO	33400000	40709407	0	0	0.0000	37	39	1.02	1.03	0.95
CM015575.1_RaGOO	33450000	40709407	1	0	0.0000	35	37	0.98	0.99	0.95
CM015575.1_RaGOO	33500000	40709407	0	1	0.0000	38	39	1.05	1.04	0.98
CM015575.1_RaGOO	33550000	40709407	0	1	0.0000	36	39	1.01	1.03	0.94
CM015575.1_RaGOO	33600000	40709407	0	0	0.0000	39	41	1.09	1.09	0.95
CM015575.1_RaGOO	33650000	40709407	1	0	0.0000	41	41	1.13	1.11	0.98
CM015575.1_RaGOO	33700000	40709407	0	0	0.0000	38	39	1.05	1.05	0.96
CM015575.1_RaGOO	33750000	40709407	0	0	0.0000	34	36	0.94	0.97	0.93
CM015575.1_RaGOO	33800000	40709407	0	0	0.0000	37	38	1.03	1.03	0.96
CM015575.1_RaGOO	33850000	40709407	0	0	0.0000	38	41	1.07	1.09	0.94
CM015575.1_RaGOO	33900000	40709407	0	0	0.0000	36	39	1.01	1.03	0.94
CM015575.1_RaGOO	33950000	40709407	5	0	0.0000	34	36	0.95	0.96	0.96
CM015575.1_RaGOO	34000000	40709407	1	0	0.0000	33	35	0.93	0.94	0.94
CM015575.1_RaGOO	34050000	40709407	0	0	0.0000	33	34	0.92	0.92	0.96
CM015575.1_RaGOO	34100000	40709407	0	0	0.0000	37	40	1.03	1.06	0.93
CM015575.1_RaGOO	34150000	40709407	0	0	0.0000	37	39	1.02	1.03	0.95
CM015575.1_RaGOO	34200000	40709407	0	0	0.0000	34	36	0.94	0.97	0.93
CM015575.1_RaGOO	34250000	40709407	0	0	0.0000	37	38	1.03	1.02	0.97
CM015575.1_RaGOO	34300000	40709407	0	0	0.0000	39	39	1.08	1.06	0.98
CM015575.1_RaGOO	34350000	40709407	0	0	0.0000	38	40	1.06	1.06	0.96
CM015575.1_RaGOO	34400000	40709407	0	0	0.0000	35	36	0.96	0.97	0.95
CM015575.1_RaGOO	34450000	40709407	0	0	0.0000	34	37	0.94	0.98	0.92
CM015575.1_RaGOO	34500000	40709407	2	1	0.0038	36	38	1.00	1.01	0.95
CM015575.1_RaGOO	34550000	40709407	2	0	0.0000	35	37	0.97	0.99	0.95
CM015575.1_RaGOO	34600000	40709407	0	2	0.0000	34	36	0.93	0.97	0.92
CM015575.1_RaGOO	34650000	40709407	0	1	0.0000	35	38	0.96	1.01	0.92
CM015575.1_RaGOO	34700000	40709407	0	0	0.0000	33	36	0.93	0.96	0.93
CM015575.1_RaGOO	34750000	40709407	0	0	0.0000	35	37	0.98	1.00	0.94
CM015575.1_RaGOO	34800000	40709407	0	0	0.0000	37	39	1.02	1.04	0.94
CM015575.1_RaGOO	34850000	40709407	0	0	0.0000	34	36	0.96	0.96	0.95
CM015575.1_RaGOO	34900000	40709407	1	2	0.0000	38	40	1.07	1.06	0.97
CM015575.1_RaGOO	34950000	40709407	0	0	0.0000	33	34	0.91	0.92	0.95
CM015575.1_RaGOO	35000000	40709407	0	0	0.0000	32	35	0.90	0.93	0.94
CM015575.1_RaGOO	35050000	40709407	3	0	0.0000	29	31	0.81	0.83	0.95
CM015575.1_RaGOO	35100000	40709407	0	0	0.0000	33	36	0.92	0.95	0.93
CM015575.1_RaGOO	35150000	40709407	0	0	0.0000	34	35	0.94	0.93	0.96
CM015575.1_RaGOO	35200000	40709407	0	0	0.0000	35	36	0.97	0.97	0.96
CM015575.1_RaGOO	35250000	40709407	0	0	0.0000	37	39	1.02	1.05	0.94
CM015575.1_RaGOO	35300000	40709407	1	0	0.0000	82	83	2.29	2.23	0.99
CM015575.1_RaGOO	35350000	40709407	0	0	0.0000	36	37	1.00	1.00	0.95
CM015575.1_RaGOO	35400000	40709407	1	1	0.0000	37	39	1.02	1.03	0.95
CM015575.1_RaGOO	35450000	40709407	1	0	0.0000	39	40	1.10	1.08	0.98
CM015575.1_RaGOO	35500000	40709407	0	1	0.0000	38	38	1.05	1.03	0.98
CM015575.1_RaGOO	35550000	40709407	0	0	0.0000	33	34	0.91	0.90	0.97
CM015575.1_RaGOO	35600000	40709407	0	0	0.0000	41	42	1.14	1.13	0.97
CM015575.1_RaGOO	35650000	40709407	0	0	0.0000	33	35	0.93	0.95	0.94
CM015575.1_RaGOO	35700000	40709407	0	0	0.0000	34	36	0.94	0.96	0.95
CM015575.1_RaGOO	35750000	40709407	4	0	0.0000	34	35	0.94	0.93	0.97
CM015575.1_RaGOO	35800000	40709407	0	0	0.0000	36	36	1.01	0.96	1.00
CM015575.1_RaGOO	35850000	40709407	0	0	0.0000	37	38	1.03	1.03	0.96
CM015575.1_RaGOO	35900000	40709407	0	0	0.0000	34	36	0.96	0.96	0.96
CM015575.1_RaGOO	35950000	40709407	0	0	0.0000	35	38	0.98	1.01	0.93
CM015575.1_RaGOO	36000000	40709407	0	0	0.0000	34	36	0.94	0.96	0.94
CM015575.1_RaGOO	36050000	40709407	0	0	0.0000	35	38	0.97	1.02	0.92
CM015575.1_RaGOO	36100000	40709407	2	0	0.0000	37	38	1.03	1.02	0.97
CM015575.1_RaGOO	36150000	40709407	2	0	0.0000	39	40	1.09	1.08	0.97
CM015575.1_RaGOO	36200000	40709407	3	0	0.0004	38	39	1.06	1.04	0.98
CM015575.1_RaGOO	36250000	40709407	0	0	0.0000	32	35	0.89	0.93	0.93
CM015575.1_RaGOO	36300000	40709407	2	0	0.0000	37	38	1.03	1.01	0.98
CM015575.1_RaGOO	36350000	40709407	1	0	0.0000	33	36	0.93	0.96	0.93
CM015575.1_RaGOO	36400000	40709407	0	2	0.0000	33	35	0.92	0.94	0.94
CM015575.1_RaGOO	36450000	40709407	2	1	0.0000	33	35	0.91	0.93	0.94
CM015575.1_RaGOO	36500000	40709407	0	0	0.0000	37	38	1.04	1.03	0.97
CM015575.1_RaGOO	36550000	40709407	9	1	0.0000	35	37	0.99	1.00	0.95
CM015575.1_RaGOO	36600000	40709407	7	0	0.0000	36	37	0.99	1.00	0.96
CM015575.1_RaGOO	36650000	40709407	0	0	0.0000	36	37	1.00	1.00	0.96
CM015575.1_RaGOO	36700000	40709407	0	0	0.0000	36	38	1.00	1.02	0.95
CM015575.1_RaGOO	36750000	40709407	1	1	0.0000	39	41	1.09	1.09	0.96
CM015575.1_RaGOO	36800000	40709407	0	0	0.0000	34	37	0.96	0.98	0.94
CM015575.1_RaGOO	36850000	40709407	0	0	0.0000	36	37	1.01	0.98	0.99
CM015575.1_RaGOO	36900000	40709407	0	0	0.0000	34	37	0.96	0.98	0.93
CM015575.1_RaGOO	36950000	40709407	1	0	0.0000	32	34	0.89	0.92	0.93
CM015575.1_RaGOO	37000000	40709407	0	0	0.0000	34	35	0.96	0.95	0.97
CM015575.1_RaGOO	37050000	40709407	0	0	0.0000	14	14	0.38	0.39	0.95
CM015575.1_RaGOO	37100000	40709407	0	0	0.0000	33	36	0.92	0.96	0.92
CM015575.1_RaGOO	37150000	40709407	0	0	0.0000	34	35	0.94	0.94	0.97
CM015575.1_RaGOO	37200000	40709407	0	0	0.0000	24	24	0.66	0.64	0.98
CM015575.1_RaGOO	37250000	40709407	0	0	0.0000	36	37	1.00	1.00	0.97
CM015575.1_RaGOO	37300000	40709407	0	0	0.0000	32	33	0.90	0.90	0.96
CM015575.1_RaGOO	37350000	40709407	0	0	0.0000	31	32	0.87	0.86	0.97
CM015575.1_RaGOO	37400000	40709407	0	4	0.0000	32	34	0.89	0.92	0.93
CM015575.1_RaGOO	37450000	40709407	0	0	0.0000	32	35	0.90	0.93	0.93
CM015575.1_RaGOO	37500000	40709407	0	0	0.0000	35	37	0.97	0.99	0.95
CM015575.1_RaGOO	37550000	40709407	0	1	0.0000	35	36	0.96	0.97	0.96
CM015575.1_RaGOO	37600000	40709407	5	0	0.0000	36	37	0.99	0.98	0.97
CM015575.1_RaGOO	37650000	40709407	0	0	0.0000	39	41	1.09	1.09	0.96
CM015575.1_RaGOO	37700000	40709407	1	0	0.0000	36	37	1.01	0.98	1.00
CM015575.1_RaGOO	37750000	40709407	9	0	0.0000	31	32	0.85	0.87	0.94
CM015575.1_RaGOO	37800000	40709407	0	0	0.0000	38	40	1.07	1.07	0.96
CM015575.1_RaGOO	37850000	40709407	0	0	0.0000	42	45	1.18	1.20	0.95
CM015575.1_RaGOO	37900000	40709407	1	0	0.0000	34	35	0.94	0.95	0.95
CM015575.1_RaGOO	37950000	40709407	0	1	0.0000	39	40	1.07	1.06	0.97
CM015575.1_RaGOO	38000000	40709407	0	0	0.0000	34	36	0.96	0.96	0.96
CM015575.1_RaGOO	38050000	40709407	0	0	0.0000	37	40	1.03	1.06	0.93
CM015575.1_RaGOO	38100000	40709407	1	0	0.0000	40	42	1.11	1.12	0.95
CM015575.1_RaGOO	38150000	40709407	0	0	0.0000	35	36	0.99	0.97	0.98
CM015575.1_RaGOO	38200000	40709407	0	0	0.0000	43	44	1.19	1.18	0.97
CM015575.1_RaGOO	38250000	40709407	0	1	0.0000	36	38	1.01	1.01	0.96
CM015575.1_RaGOO	38300000	40709407	0	0	0.0000	34	36	0.94	0.97	0.93
CM015575.1_RaGOO	38350000	40709407	1	0	0.0000	36	37	1.00	0.98	0.97
CM015575.1_RaGOO	38400000	40709407	0	0	0.0000	37	37	1.02	0.98	1.00
CM015575.1_RaGOO	38450000	40709407	0	0	0.0000	34	35	0.94	0.94	0.96
CM015575.1_RaGOO	38500000	40709407	0	0	0.0000	39	41	1.08	1.11	0.94
CM015575.1_RaGOO	38550000	40709407	1	0	0.0000	36	37	0.99	0.98	0.97
CM015575.1_RaGOO	38600000	40709407	0	0	0.0000	40	43	1.11	1.14	0.93
CM015575.1_RaGOO	38650000	40709407	0	1	0.0000	35	36	0.98	0.96	0.98
CM015575.1_RaGOO	38700000	40709407	1	0	0.0000	37	38	1.04	1.02	0.98
CM015575.1_RaGOO	38750000	40709407	0	0	0.0000	28	30	0.79	0.80	0.94
CM015575.1_RaGOO	38800000	40709407	0	0	0.0000	33	34	0.93	0.92	0.97
CM015575.1_RaGOO	38850000	40709407	0	0	0.0000	41	43	1.15	1.16	0.95
CM015575.1_RaGOO	38900000	40709407	0	0	0.0000	36	38	1.00	1.02	0.94
CM015575.1_RaGOO	38950000	40709407	0	0	0.0000	34	36	0.95	0.96	0.95
CM015575.1_RaGOO	39000000	40709407	0	0	0.0000	33	35	0.92	0.93	0.95
CM015575.1_RaGOO	39050000	40709407	0	1	0.0000	36	37	1.00	0.99	0.96
CM015575.1_RaGOO	39100000	40709407	2	12	0.0000	15	16	0.42	0.43	0.93
CM015575.1_RaGOO	39150000	40709407	0	0	0.0000	9	9	0.24	0.24	0.95
CM015575.1_RaGOO	39200000	40709407	0	0	0.0000	17	19	0.49	0.50	0.93
CM015575.1_RaGOO	39250000	40709407	0	0	0.0000	35	37	0.98	1.00	0.94
CM015575.1_RaGOO	39300000	40709407	0	0	0.0000	32	33	0.88	0.87	0.97
CM015575.1_RaGOO	39350000	40709407	0	0	0.0000	19	19	0.52	0.52	0.97
CM015575.1_RaGOO	39400000	40709407	0	1	0.0000	19	21	0.54	0.55	0.94
CM015575.1_RaGOO	39450000	40709407	1	0	0.0000	38	39	1.05	1.05	0.96
CM015575.1_RaGOO	39500000	40709407	0	1	0.0000	34	35	0.93	0.94	0.96
CM015575.1_RaGOO	39550000	40709407	3	6	0.0000	33	35	0.92	0.95	0.93
CM015575.1_RaGOO	39600000	40709407	0	0	0.0000	34	35	0.94	0.93	0.97
CM015575.1_RaGOO	39650000	40709407	0	1	0.0000	34	36	0.94	0.97	0.93
CM015575.1_RaGOO	39700000	40709407	0	0	0.0000	39	42	1.09	1.12	0.93
CM015575.1_RaGOO	39750000	40709407	0	0	0.0000	22	22	0.60	0.58	0.99
CM015575.1_RaGOO	39800000	40709407	4	0	0.0000	23	24	0.65	0.64	0.97
CM015575.1_RaGOO	39850000	40709407	0	0	0.0000	22	23	0.62	0.62	0.97
CM015575.1_RaGOO	39900000	40709407	0	0	0.0000	33	34	0.92	0.90	0.99
CM015575.1_RaGOO	39950000	40709407	0	0	0.0000	35	35	0.97	0.93	1.00
CM015575.1_RaGOO	40000000	40709407	0	0	0.0000	35	36	0.97	0.97	0.96
CM015575.1_RaGOO	40050000	40709407	0	0	0.0000	40	40	1.12	1.06	1.02
CM015575.1_RaGOO	40100000	40709407	0	0	0.0000	46	48	1.27	1.29	0.95
CM015575.1_RaGOO	40150000	40709407	0	0	0.0000	39	40	1.08	1.08	0.96
CM015575.1_RaGOO	40200000	40709407	0	1	0.0000	37	39	1.03	1.03	0.96
CM015575.1_RaGOO	40250000	40709407	0	0	0.0000	35	36	0.96	0.97	0.96
CM015575.1_RaGOO	40300000	40709407	0	0	0.0000	37	39	1.04	1.04	0.95
CM015575.1_RaGOO	40350000	40709407	0	1	0.0000	34	36	0.94	0.98	0.93
CM015575.1_RaGOO	40400000	40709407	0	0	0.0000	46	48	1.29	1.30	0.96
CM015575.1_RaGOO	40450000	40709407	0	1	0.0000	35	36	0.97	0.97	0.96
CM015575.1_RaGOO	40500000	40709407	0	3	0.0000	35	37	0.97	0.99	0.94
CM015575.1_RaGOO	40550000	40709407	0	1	0.0000	33	34	0.92	0.91	0.97
CM015575.1_RaGOO	40600000	40709407	1	1	0.0000	35	36	0.97	0.97	0.96
CM015575.1_RaGOO	40650000	40709407	0	1	0.0000	179	148	4.98	3.96	1.21
CM015575.1_RaGOO	40675000	40709407	2	0	0.0000	117	120	3.25	3.20	0.97
CM015576.1_RaGOO	0	37358125	0	0	0.0000	31	33	0.85	0.87	0.94
CM015576.1_RaGOO	50000	37358125	2	0	0.0000	33	35	0.91	0.93	0.93
CM015576.1_RaGOO	100000	37358125	8	0	0.0000	31	33	0.86	0.89	0.94
CM015576.1_RaGOO	150000	37358125	1	0	0.0000	33	35	0.91	0.94	0.93
CM015576.1_RaGOO	200000	37358125	1	1	0.0000	35	37	0.97	0.99	0.94
CM015576.1_RaGOO	250000	37358125	1	1	0.0000	34	35	0.94	0.94	0.97
CM015576.1_RaGOO	300000	37358125	1	0	0.0000	35	36	0.97	0.97	0.96
CM015576.1_RaGOO	350000	37358125	2	0	0.0000	34	35	0.94	0.95	0.95
CM015576.1_RaGOO	400000	37358125	2	0	0.0000	32	34	0.89	0.92	0.93
CM015576.1_RaGOO	450000	37358125	2	2	0.0000	33	34	0.92	0.90	0.98
CM015576.1_RaGOO	500000	37358125	0	2	0.0000	34	35	0.95	0.95	0.97
CM015576.1_RaGOO	550000	37358125	1	1	0.0000	36	37	0.99	0.98	0.97
CM015576.1_RaGOO	600000	37358125	2	0	0.0000	30	33	0.85	0.87	0.94
CM015576.1_RaGOO	650000	37358125	2	3	0.0000	32	35	0.88	0.93	0.91
CM015576.1_RaGOO	700000	37358125	0	4	0.0000	32	35	0.90	0.95	0.91
CM015576.1_RaGOO	750000	37358125	3	0	0.0003	34	36	0.94	0.96	0.94
CM015576.1_RaGOO	800000	37358125	0	0	0.0000	34	34	0.94	0.92	0.98
CM015576.1_RaGOO	850000	37358125	21	1	0.0000	39	42	1.10	1.13	0.93
CM015576.1_RaGOO	900000	37358125	8	0	0.0000	37	38	1.02	1.01	0.96
CM015576.1_RaGOO	950000	37358125	2	0	0.0000	35	39	0.97	1.03	0.90
CM015576.1_RaGOO	1000000	37358125	1	0	0.0000	35	37	0.98	0.99	0.95
CM015576.1_RaGOO	1050000	37358125	3	3	0.0000	36	36	0.99	0.96	0.99
CM015576.1_RaGOO	1100000	37358125	0	0	0.0000	35	37	0.97	0.99	0.94
CM015576.1_RaGOO	1150000	37358125	6	3	0.0000	34	35	0.95	0.94	0.97
CM015576.1_RaGOO	1200000	37358125	0	23	0.0000	45	46	1.24	1.23	0.97
CM015576.1_RaGOO	1250000	37358125	0	3	0.0000	34	32	0.94	0.85	1.06
CM015576.1_RaGOO	1300000	37358125	0	7	0.0000	34	36	0.96	0.97	0.95
CM015576.1_RaGOO	1350000	37358125	0	0	0.0000	36	38	1.00	1.03	0.93
CM015576.1_RaGOO	1400000	37358125	8	1	0.0000	31	33	0.85	0.89	0.92
CM015576.1_RaGOO	1450000	37358125	1	3	0.0000	34	34	0.95	0.91	1.00
CM015576.1_RaGOO	1500000	37358125	1	1	0.0000	38	40	1.06	1.08	0.94
CM015576.1_RaGOO	1550000	37358125	0	0	0.0000	39	42	1.09	1.13	0.92
CM015576.1_RaGOO	1600000	37358125	0	5	0.0000	39	38	1.08	1.02	1.02
CM015576.1_RaGOO	1650000	37358125	5	0	0.0000	37	38	1.02	1.02	0.96
CM015576.1_RaGOO	1700000	37358125	0	1	0.0000	39	39	1.08	1.05	0.99
CM015576.1_RaGOO	1750000	37358125	3	0	0.0000	34	34	0.94	0.92	0.99
CM015576.1_RaGOO	1800000	37358125	2	2	0.0000	34	36	0.95	0.95	0.96
CM015576.1_RaGOO	1850000	37358125	2	2	0.0000	35	35	0.98	0.95	1.00
CM015576.1_RaGOO	1900000	37358125	3	9	0.0000	35	36	0.98	0.97	0.98
CM015576.1_RaGOO	1950000	37358125	1	0	0.0000	34	36	0.95	0.97	0.93
CM015576.1_RaGOO	2000000	37358125	2	1	0.0000	35	36	0.98	0.96	0.98
CM015576.1_RaGOO	2050000	37358125	1	0	0.0000	16	17	0.44	0.44	0.95
CM015576.1_RaGOO	2100000	37358125	0	0	0.0000	39	40	1.08	1.06	0.98
CM015576.1_RaGOO	2150000	37358125	1	0	0.0000	40	40	1.11	1.08	0.99
CM015576.1_RaGOO	2200000	37358125	4	2	0.0005	38	40	1.07	1.08	0.95
CM015576.1_RaGOO	2250000	37358125	4	6	0.0000	34	37	0.96	1.00	0.93
CM015576.1_RaGOO	2300000	37358125	1	1	0.0000	38	39	1.07	1.05	0.98
CM015576.1_RaGOO	2350000	37358125	5	1	0.0000	34	36	0.94	0.96	0.95
CM015576.1_RaGOO	2400000	37358125	1	0	0.0000	33	36	0.92	0.96	0.92
CM015576.1_RaGOO	2450000	37358125	5	1	0.0012	38	38	1.06	1.02	0.99
CM015576.1_RaGOO	2500000	37358125	1	5	0.0000	36	37	1.01	0.99	0.98
CM015576.1_RaGOO	2550000	37358125	15	0	0.0038	34	37	0.94	1.00	0.91
CM015576.1_RaGOO	2600000	37358125	3	0	0.0000	26	27	0.73	0.72	0.98
CM015576.1_RaGOO	2650000	37358125	32	57	0.0000	15	17	0.43	0.46	0.90
CM015576.1_RaGOO	2700000	37358125	29	16	0.0000	13	16	0.35	0.42	0.81
CM015576.1_RaGOO	2750000	37358125	12	16	0.0000	9	10	0.26	0.28	0.89
CM015576.1_RaGOO	2800000	37358125	22	5	0.0231	7	9	0.19	0.24	0.76
CM015576.1_RaGOO	2850000	37358125	23	4	0.0002	16	15	0.44	0.40	1.07
CM015576.1_RaGOO	2900000	37358125	26	18	0.0000	20	24	0.55	0.63	0.83
CM015576.1_RaGOO	2950000	37358125	7	5	0.0000	17	30	0.48	0.79	0.58
CM015576.1_RaGOO	3000000	37358125	7	12	0.0000	21	25	0.57	0.67	0.82
CM015576.1_RaGOO	3050000	37358125	28	12	0.0000	23	26	0.63	0.69	0.88
CM015576.1_RaGOO	3100000	37358125	54	3	0.0015	9	17	0.25	0.46	0.52
CM015576.1_RaGOO	3150000	37358125	6	10	0.0000	14	15	0.38	0.41	0.90
CM015576.1_RaGOO	3200000	37358125	3	4	0.0000	21	30	0.60	0.80	0.72
CM015576.1_RaGOO	3250000	37358125	6	3	0.0023	36	40	0.99	1.06	0.90
CM015576.1_RaGOO	3300000	37358125	10	1	0.0042	42	42	1.17	1.13	0.99
CM015576.1_RaGOO	3350000	37358125	5	1	0.0000	39	39	1.10	1.05	1.00
CM015576.1_RaGOO	3400000	37358125	2	1	0.0000	38	39	1.05	1.05	0.96
CM015576.1_RaGOO	3450000	37358125	1	2	0.0000	40	41	1.12	1.11	0.97
CM015576.1_RaGOO	3500000	37358125	3	0	0.0000	37	38	1.04	1.01	0.99
CM015576.1_RaGOO	3550000	37358125	0	0	0.0000	33	35	0.93	0.93	0.96
CM015576.1_RaGOO	3600000	37358125	1	4	0.0000	36	37	1.00	0.99	0.98
CM015576.1_RaGOO	3650000	37358125	2	6	0.0000	35	36	0.97	0.96	0.98
CM015576.1_RaGOO	3700000	37358125	2	1	0.0000	36	36	1.00	0.97	0.99
CM015576.1_RaGOO	3750000	37358125	13	1	0.0000	33	34	0.91	0.91	0.96
CM015576.1_RaGOO	3800000	37358125	2	2	0.0000	35	36	0.96	0.97	0.95
CM015576.1_RaGOO	3850000	37358125	1	0	0.0000	33	36	0.92	0.96	0.91
CM015576.1_RaGOO	3900000	37358125	4	2	0.0000	28	30	0.79	0.80	0.95
CM015576.1_RaGOO	3950000	37358125	1	3	0.0000	11	9	0.29	0.23	1.21
CM015576.1_RaGOO	4000000	37358125	0	10	0.0000	4	4	0.12	0.10	1.16
CM015576.1_RaGOO	4050000	37358125	4	24	0.0000	12	11	0.34	0.31	1.07
CM015576.1_RaGOO	4100000	37358125	13	4	0.0000	21	21	0.58	0.57	0.97
CM015576.1_RaGOO	4150000	37358125	3	54	0.0000	23	22	0.64	0.60	1.03
CM015576.1_RaGOO	4200000	37358125	1	25	0.0000	13	13	0.36	0.36	0.97
CM015576.1_RaGOO	4250000	37358125	11	13	0.0000	14	12	0.39	0.31	1.21
CM015576.1_RaGOO	4300000	37358125	3	19	0.0000	23	24	0.65	0.65	0.96
CM015576.1_RaGOO	4350000	37358125	1	5	0.0000	35	36	0.96	0.96	0.96
CM015576.1_RaGOO	4400000	37358125	9	0	0.0000	34	37	0.95	0.98	0.93
CM015576.1_RaGOO	4450000	37358125	2	0	0.0000	38	39	1.06	1.04	0.98
CM015576.1_RaGOO	4500000	37358125	0	1	0.0000	38	39	1.06	1.04	0.98
CM015576.1_RaGOO	4550000	37358125	6	6	0.0000	34	35	0.95	0.94	0.97
CM015576.1_RaGOO	4600000	37358125	2	0	0.0000	33	34	0.93	0.92	0.97
CM015576.1_RaGOO	4650000	37358125	2	2	0.0000	31	33	0.86	0.87	0.95
CM015576.1_RaGOO	4700000	37358125	8	5	0.0000	33	35	0.93	0.93	0.96
CM015576.1_RaGOO	4750000	37358125	5	1	0.0000	38	39	1.05	1.04	0.97
CM015576.1_RaGOO	4800000	37358125	0	2	0.0000	37	39	1.02	1.05	0.94
CM015576.1_RaGOO	4850000	37358125	2	4	0.0000	38	38	1.05	1.02	0.99
CM015576.1_RaGOO	4900000	37358125	10	1	0.0000	37	38	1.04	1.02	0.97
CM015576.1_RaGOO	4950000	37358125	0	1	0.0000	38	38	1.05	1.02	0.99
CM015576.1_RaGOO	5000000	37358125	0	1	0.0000	38	40	1.07	1.08	0.96
CM015576.1_RaGOO	5050000	37358125	6	1	0.0000	40	41	1.12	1.10	0.97
CM015576.1_RaGOO	5100000	37358125	0	2	0.0016	39	42	1.09	1.11	0.94
CM015576.1_RaGOO	5150000	37358125	0	5	0.0000	37	39	1.04	1.04	0.96
CM015576.1_RaGOO	5200000	37358125	0	0	0.0000	37	37	1.02	0.98	0.99
CM015576.1_RaGOO	5250000	37358125	1	1	0.0082	37	37	1.04	1.00	1.01
CM015576.1_RaGOO	5300000	37358125	0	6	0.0000	37	39	1.02	1.05	0.93
CM015576.1_RaGOO	5350000	37358125	0	2	0.0000	39	40	1.08	1.08	0.96
CM015576.1_RaGOO	5400000	37358125	2	0	0.0000	30	30	0.83	0.81	0.98
CM015576.1_RaGOO	5450000	37358125	3	1	0.0000	39	38	1.08	1.02	1.02
CM015576.1_RaGOO	5500000	37358125	2	0	0.0000	43	46	1.21	1.24	0.94
CM015576.1_RaGOO	5550000	37358125	1	0	0.0000	41	41	1.13	1.10	1.00
CM015576.1_RaGOO	5600000	37358125	13	0	0.0323	38	39	1.07	1.05	0.97
CM015576.1_RaGOO	5650000	37358125	6	0	0.0218	35	38	0.98	1.01	0.94
CM015576.1_RaGOO	5700000	37358125	11	0	0.0113	42	44	1.17	1.17	0.96
CM015576.1_RaGOO	5750000	37358125	0	0	0.0000	43	46	1.21	1.22	0.95
CM015576.1_RaGOO	5800000	37358125	0	1	0.0000	39	41	1.10	1.09	0.97
CM015576.1_RaGOO	5850000	37358125	1	0	0.0000	37	40	1.04	1.08	0.93
CM015576.1_RaGOO	5900000	37358125	10	9	0.0154	39	41	1.09	1.09	0.97
CM015576.1_RaGOO	5950000	37358125	1	0	0.0000	41	41	1.14	1.11	0.99
CM015576.1_RaGOO	6000000	37358125	0	1	0.0000	38	38	1.06	1.03	0.99
CM015576.1_RaGOO	6050000	37358125	3	0	0.0000	39	41	1.08	1.11	0.94
CM015576.1_RaGOO	6100000	37358125	1	4	0.0000	32	35	0.90	0.92	0.94
CM015576.1_RaGOO	6150000	37358125	2	0	0.0000	36	38	1.00	1.01	0.95
CM015576.1_RaGOO	6200000	37358125	0	0	0.0000	38	40	1.05	1.07	0.95
CM015576.1_RaGOO	6250000	37358125	1	10	0.0086	41	41	1.14	1.10	0.99
CM015576.1_RaGOO	6300000	37358125	2	1	0.0181	39	41	1.10	1.09	0.97
CM015576.1_RaGOO	6350000	37358125	0	0	0.0000	36	38	1.00	1.02	0.94
CM015576.1_RaGOO	6400000	37358125	0	1	0.0000	39	40	1.08	1.08	0.96
CM015576.1_RaGOO	6450000	37358125	0	0	0.0000	47	49	1.30	1.31	0.96
CM015576.1_RaGOO	6500000	37358125	0	0	0.0000	44	45	1.23	1.20	0.98
CM015576.1_RaGOO	6550000	37358125	4	4	0.0236	38	39	1.07	1.04	0.99
CM015576.1_RaGOO	6600000	37358125	5	6	0.0130	42	44	1.16	1.17	0.95
CM015576.1_RaGOO	6650000	37358125	1	0	0.0056	43	40	1.19	1.07	1.07
CM015576.1_RaGOO	6700000	37358125	0	40	0.0000	39	41	1.09	1.10	0.95
CM015576.1_RaGOO	6750000	37358125	14	0	0.0284	29	31	0.82	0.83	0.95
CM015576.1_RaGOO	6800000	37358125	7	5	0.0000	23	25	0.65	0.67	0.93
CM015576.1_RaGOO	6850000	37358125	2	7	0.0000	12	10	0.34	0.26	1.26
CM015576.1_RaGOO	6900000	37358125	12	5	0.0000	13	11	0.35	0.29	1.18
CM015576.1_RaGOO	6950000	37358125	5	4	0.0000	19	20	0.54	0.53	0.98
CM015576.1_RaGOO	7000000	37358125	7	21	0.0000	12	13	0.34	0.34	0.96
CM015576.1_RaGOO	7050000	37358125	5	4	0.0000	13	13	0.38	0.36	1.01
CM015576.1_RaGOO	7100000	37358125	23	2	0.0000	20	19	0.55	0.50	1.06
CM015576.1_RaGOO	7150000	37358125	6	12	0.0000	17	20	0.49	0.54	0.87
CM015576.1_RaGOO	7200000	37358125	27	3	0.0000	17	19	0.48	0.51	0.91
CM015576.1_RaGOO	7250000	37358125	49	11	0.0000	12	13	0.33	0.35	0.91
CM015576.1_RaGOO	7300000	37358125	15	14	0.0000	11	13	0.30	0.35	0.81
CM015576.1_RaGOO	7350000	37358125	2	5	0.0000	5	5	0.13	0.13	0.96
CM015576.1_RaGOO	7400000	37358125	14	11	0.0000	16	15	0.46	0.41	1.08
CM015576.1_RaGOO	7450000	37358125	28	13	0.0000	14	13	0.38	0.34	1.07
CM015576.1_RaGOO	7500000	37358125	3	16	0.0000	19	16	0.52	0.42	1.17
CM015576.1_RaGOO	7550000	37358125	1	8	0.0000	38	39	1.07	1.05	0.97
CM015576.1_RaGOO	7600000	37358125	6	1	0.0000	42	44	1.16	1.16	0.96
CM015576.1_RaGOO	7650000	37358125	0	1	0.0000	42	42	1.17	1.12	1.00
CM015576.1_RaGOO	7700000	37358125	0	1	0.0000	41	42	1.15	1.13	0.98
CM015576.1_RaGOO	7750000	37358125	1	0	0.0000	40	41	1.12	1.10	0.98
CM015576.1_RaGOO	7800000	37358125	0	0	0.0000	39	40	1.09	1.07	0.98
CM015576.1_RaGOO	7850000	37358125	3	0	0.0000	39	40	1.09	1.06	0.99
CM015576.1_RaGOO	7900000	37358125	4	0	0.0000	40	41	1.11	1.10	0.97
CM015576.1_RaGOO	7950000	37358125	7	2	0.0000	38	40	1.06	1.06	0.96
CM015576.1_RaGOO	8000000	37358125	4	4	0.0000	33	36	0.93	0.98	0.92
CM015576.1_RaGOO	8050000	37358125	3	0	0.0000	59	65	1.64	1.73	0.91
CM015576.1_RaGOO	8100000	37358125	2	1	0.0000	39	39	1.07	1.04	0.99
CM015576.1_RaGOO	8150000	37358125	0	0	0.0000	39	42	1.09	1.11	0.94
CM015576.1_RaGOO	8200000	37358125	11	2	0.0039	40	41	1.10	1.09	0.97
CM015576.1_RaGOO	8250000	37358125	2	1	0.0000	44	48	1.22	1.30	0.90
CM015576.1_RaGOO	8300000	37358125	1	3	0.0000	40	47	1.10	1.26	0.84
CM015576.1_RaGOO	8350000	37358125	5	4	0.0000	40	42	1.12	1.12	0.96
CM015576.1_RaGOO	8400000	37358125	6	14	0.0000	54	65	1.51	1.73	0.84
CM015576.1_RaGOO	8450000	37358125	2	0	0.0000	40	41	1.13	1.10	0.98
CM015576.1_RaGOO	8500000	37358125	0	0	0.0000	40	40	1.11	1.07	1.00
CM015576.1_RaGOO	8550000	37358125	7	1	0.0018	39	40	1.08	1.08	0.96
CM015576.1_RaGOO	8600000	37358125	0	1	0.0000	41	41	1.13	1.10	0.99
CM015576.1_RaGOO	8650000	37358125	0	0	0.0229	40	43	1.11	1.14	0.93
CM015576.1_RaGOO	8700000	37358125	28	11	0.0030	35	34	0.97	0.92	1.01
CM015576.1_RaGOO	8750000	37358125	1	0	0.0000	39	41	1.09	1.10	0.95
CM015576.1_RaGOO	8800000	37358125	1	1	0.0000	43	44	1.20	1.17	0.99
CM015576.1_RaGOO	8850000	37358125	0	3	0.0000	41	41	1.14	1.10	0.99
CM015576.1_RaGOO	8900000	37358125	2	0	0.0000	38	40	1.07	1.06	0.97
CM015576.1_RaGOO	8950000	37358125	2	0	0.0000	39	39	1.07	1.04	0.99
CM015576.1_RaGOO	9000000	37358125	0	0	0.0000	42	42	1.17	1.13	0.99
CM015576.1_RaGOO	9050000	37358125	0	0	0.0000	36	38	1.01	1.01	0.96
CM015576.1_RaGOO	9100000	37358125	0	0	0.0000	41	42	1.15	1.12	0.99
CM015576.1_RaGOO	9150000	37358125	2	0	0.0000	43	46	1.20	1.22	0.95
CM015576.1_RaGOO	9200000	37358125	0	2	0.0000	37	39	1.04	1.04	0.96
CM015576.1_RaGOO	9250000	37358125	0	0	0.0114	38	41	1.07	1.09	0.94
CM015576.1_RaGOO	9300000	37358125	5	0	0.0000	38	39	1.06	1.05	0.97
CM015576.1_RaGOO	9350000	37358125	3	0	0.0000	35	36	0.97	0.96	0.97
CM015576.1_RaGOO	9400000	37358125	1	2	0.0000	44	46	1.23	1.24	0.96
CM015576.1_RaGOO	9450000	37358125	0	2	0.0018	43	43	1.20	1.14	1.01
CM015576.1_RaGOO	9500000	37358125	0	1	0.0000	39	40	1.10	1.07	0.99
CM015576.1_RaGOO	9550000	37358125	0	0	0.0000	40	40	1.10	1.07	0.98
CM015576.1_RaGOO	9600000	37358125	0	1	0.0000	40	41	1.11	1.08	0.98
CM015576.1_RaGOO	9650000	37358125	3	0	0.0000	45	46	1.26	1.23	0.98
CM015576.1_RaGOO	9700000	37358125	1	0	0.0000	34	36	0.94	0.95	0.95
CM015576.1_RaGOO	9750000	37358125	12	0	0.0000	38	40	1.06	1.06	0.96
CM015576.1_RaGOO	9800000	37358125	0	0	0.0000	37	38	1.02	1.03	0.96
CM015576.1_RaGOO	9850000	37358125	1	1	0.0000	39	39	1.10	1.06	1.00
CM015576.1_RaGOO	9900000	37358125	0	0	0.0000	38	39	1.05	1.05	0.96
CM015576.1_RaGOO	9950000	37358125	0	1	0.0000	39	41	1.08	1.10	0.94
CM015576.1_RaGOO	10000000	37358125	2	0	0.0000	41	41	1.14	1.11	0.98
CM015576.1_RaGOO	10050000	37358125	1	0	0.0036	38	39	1.05	1.04	0.97
CM015576.1_RaGOO	10100000	37358125	0	2	0.0000	39	41	1.07	1.09	0.95
CM015576.1_RaGOO	10150000	37358125	2	0	0.0000	40	41	1.11	1.10	0.97
CM015576.1_RaGOO	10200000	37358125	1	0	0.0000	38	41	1.07	1.10	0.94
CM015576.1_RaGOO	10250000	37358125	0	0	0.0000	40	42	1.11	1.12	0.94
CM015576.1_RaGOO	10300000	37358125	0	0	0.0000	40	41	1.10	1.10	0.96
CM015576.1_RaGOO	10350000	37358125	24	0	0.0159	37	40	1.03	1.07	0.93
CM015576.1_RaGOO	10400000	37358125	15	0	0.0268	40	42	1.12	1.12	0.95
CM015576.1_RaGOO	10450000	37358125	9	0	0.0216	39	41	1.07	1.11	0.93
CM015576.1_RaGOO	10500000	37358125	30	0	0.0191	37	39	1.02	1.05	0.94
CM015576.1_RaGOO	10550000	37358125	14	0	0.0305	38	41	1.07	1.10	0.94
CM015576.1_RaGOO	10600000	37358125	5	0	0.0069	40	40	1.12	1.07	1.01
CM015576.1_RaGOO	10650000	37358125	13	0	0.0000	41	41	1.14	1.11	0.99
CM015576.1_RaGOO	10700000	37358125	10	0	0.0000	37	39	1.04	1.04	0.96
CM015576.1_RaGOO	10750000	37358125	0	0	0.0000	40	41	1.11	1.10	0.97
CM015576.1_RaGOO	10800000	37358125	0	0	0.0000	40	42	1.12	1.12	0.96
CM015576.1_RaGOO	10850000	37358125	0	0	0.0000	39	41	1.09	1.10	0.95
CM015576.1_RaGOO	10900000	37358125	0	0	0.0000	38	40	1.05	1.07	0.94
CM015576.1_RaGOO	10950000	37358125	3	0	0.0000	38	40	1.07	1.07	0.96
CM015576.1_RaGOO	11000000	37358125	0	1	0.0000	37	39	1.04	1.04	0.96
CM015576.1_RaGOO	11050000	37358125	3	0	0.0000	39	40	1.08	1.08	0.96
CM015576.1_RaGOO	11100000	37358125	4	2	0.0000	38	40	1.07	1.08	0.95
CM015576.1_RaGOO	11150000	37358125	1	0	0.0000	35	37	0.97	0.98	0.95
CM015576.1_RaGOO	11200000	37358125	0	0	0.0000	39	40	1.08	1.07	0.97
CM015576.1_RaGOO	11250000	37358125	0	0	0.0000	36	37	1.00	0.98	0.98
CM015576.1_RaGOO	11300000	37358125	0	0	0.0000	33	35	0.93	0.94	0.95
CM015576.1_RaGOO	11350000	37358125	0	0	0.0000	35	37	0.99	0.98	0.96
CM015576.1_RaGOO	11400000	37358125	0	0	0.0000	34	36	0.95	0.97	0.95
CM015576.1_RaGOO	11450000	37358125	0	2	0.0000	36	37	1.01	0.99	0.98
CM015576.1_RaGOO	11500000	37358125	8	0	0.0000	36	39	1.00	1.04	0.93
CM015576.1_RaGOO	11550000	37358125	5	1	0.0000	36	37	0.99	0.99	0.97
CM015576.1_RaGOO	11600000	37358125	2	0	0.0046	39	40	1.07	1.06	0.97
CM015576.1_RaGOO	11650000	37358125	0	0	0.0000	36	38	0.99	1.00	0.95
CM015576.1_RaGOO	11700000	37358125	0	0	0.0000	37	39	1.02	1.06	0.93
CM015576.1_RaGOO	11750000	37358125	0	0	0.0000	35	38	0.97	1.01	0.92
CM015576.1_RaGOO	11800000	37358125	0	0	0.0000	33	37	0.93	0.98	0.91
CM015576.1_RaGOO	11850000	37358125	1	0	0.0000	34	36	0.95	0.97	0.93
CM015576.1_RaGOO	11900000	37358125	0	0	0.0000	37	39	1.03	1.04	0.96
CM015576.1_RaGOO	11950000	37358125	0	0	0.0000	41	42	1.15	1.14	0.97
CM015576.1_RaGOO	12000000	37358125	0	0	0.0056	39	41	1.10	1.09	0.96
CM015576.1_RaGOO	12050000	37358125	10	6	0.0076	25	27	0.69	0.73	0.90
CM015576.1_RaGOO	12100000	37358125	14	2	0.0072	28	31	0.79	0.83	0.91
CM015576.1_RaGOO	12150000	37358125	23	0	0.0113	31	32	0.86	0.86	0.96
CM015576.1_RaGOO	12200000	37358125	0	0	0.0074	35	39	0.98	1.05	0.90
CM015576.1_RaGOO	12250000	37358125	9	0	0.0022	33	34	0.92	0.92	0.96
CM015576.1_RaGOO	12300000	37358125	3	1	0.0168	32	35	0.89	0.94	0.92
CM015576.1_RaGOO	12350000	37358125	5	0	0.0161	35	37	0.98	0.99	0.95
CM015576.1_RaGOO	12400000	37358125	2	0	0.0000	38	40	1.07	1.08	0.95
CM015576.1_RaGOO	12450000	37358125	13	0	0.0188	39	42	1.08	1.11	0.93
CM015576.1_RaGOO	12500000	37358125	0	0	0.0000	39	41	1.07	1.10	0.94
CM015576.1_RaGOO	12550000	37358125	0	0	0.0000	40	42	1.10	1.13	0.94
CM015576.1_RaGOO	12600000	37358125	0	0	0.0000	34	36	0.93	0.96	0.94
CM015576.1_RaGOO	12650000	37358125	23	2	0.0000	38	38	1.05	1.02	0.98
CM015576.1_RaGOO	12700000	37358125	0	0	0.0000	39	40	1.08	1.08	0.96
CM015576.1_RaGOO	12750000	37358125	3	0	0.0000	38	39	1.05	1.05	0.96
CM015576.1_RaGOO	12800000	37358125	2	0	0.0000	34	37	0.94	0.99	0.92
CM015576.1_RaGOO	12850000	37358125	3	1	0.0000	36	39	1.00	1.03	0.94
CM015576.1_RaGOO	12900000	37358125	0	1	0.0000	34	36	0.93	0.97	0.92
CM015576.1_RaGOO	12950000	37358125	12	0	0.0000	35	37	0.98	1.00	0.93
CM015576.1_RaGOO	13000000	37358125	0	0	0.0000	35	37	0.96	0.98	0.95
CM015576.1_RaGOO	13050000	37358125	1	2	0.0000	36	37	1.00	1.00	0.96
CM015576.1_RaGOO	13100000	37358125	2	7	0.0000	38	39	1.07	1.04	0.99
CM015576.1_RaGOO	13150000	37358125	1	0	0.0000	37	38	1.03	1.03	0.97
CM015576.1_RaGOO	13200000	37358125	0	2	0.0000	33	35	0.91	0.94	0.93
CM015576.1_RaGOO	13250000	37358125	0	2	0.0000	36	38	0.99	1.02	0.94
CM015576.1_RaGOO	13300000	37358125	13	5	0.0000	33	36	0.93	0.96	0.93
CM015576.1_RaGOO	13350000	37358125	0	3	0.0000	35	37	0.98	0.98	0.96
CM015576.1_RaGOO	13400000	37358125	0	0	0.0000	33	35	0.91	0.94	0.92
[truncated: 17,192 more rows]
