# Supplementary material for: The rise and fall of the ancient northern pike master sex-determining gene
Source: eLife. 2021 Jan 28;10:e62858. doi: 10.7554/eLife.62858 (PMC7870143; doi:10.7554/eLife.62858)
Supplement: Figure 4—source data 2. [file elife-62858-fig4-data2.csv]

Contig	Position	Length	Snps_females	Snps_males	Fst	Abs_depth_females	Abs_depth_males	Rel_depth_females	Rel_depth_males	Depth_ratio
CM015574.1_RaGOO	0	45724411	0	0	0.0000	119	0	3.31	0.00	2293.69
CM015574.1_RaGOO	1000	45724411	0	0	0.0000	0	0	0.00	0.00	1.00
CM015574.1_RaGOO	2000	45724411	0	0	0.0000	0	0	0.00	0.00	1.00
CM015574.1_RaGOO	3000	45724411	0	0	0.0000	0	0	0.00	0.00	1.00
CM015574.1_RaGOO	4000	45724411	0	0	0.0000	0	0	0.00	0.00	1.00
CM015574.1_RaGOO	5000	45724411	0	0	0.0000	0	0	0.00	0.00	1.00
CM015574.1_RaGOO	6000	45724411	0	0	0.0000	0	0	0.01	0.00	1.54
CM015574.1_RaGOO	7000	45724411	0	0	0.0000	10	9	0.27	0.25	1.01
CM015574.1_RaGOO	8000	45724411	0	0	0.0061	8	10	0.23	0.28	0.80
CM015574.1_RaGOO	9000	45724411	0	1	0.0000	12	12	0.33	0.33	0.98
CM015574.1_RaGOO	10000	45724411	0	0	0.0000	15	15	0.41	0.41	0.94
CM015574.1_RaGOO	11000	45724411	0	0	0.0000	29	26	0.81	0.70	1.11
CM015574.1_RaGOO	12000	45724411	0	0	0.0000	41	42	1.15	1.12	0.99
CM015574.1_RaGOO	13000	45724411	0	0	0.0000	38	41	1.05	1.10	0.92
CM015574.1_RaGOO	14000	45724411	0	0	0.0000	41	40	1.15	1.08	1.02
CM015574.1_RaGOO	15000	45724411	0	0	0.0000	43	48	1.19	1.29	0.89
CM015574.1_RaGOO	16000	45724411	0	0	0.0000	48	52	1.34	1.38	0.94
CM015574.1_RaGOO	17000	45724411	0	0	0.0000	38	40	1.06	1.08	0.94
CM015574.1_RaGOO	18000	45724411	0	0	0.0000	36	43	1.01	1.16	0.83
CM015574.1_RaGOO	19000	45724411	0	0	0.0000	89	105	2.47	2.81	0.85
CM015574.1_RaGOO	20000	45724411	0	0	0.0000	92	85	2.56	2.27	1.08
CM015574.1_RaGOO	21000	45724411	0	0	0.0000	48	43	1.33	1.14	1.12
CM015574.1_RaGOO	22000	45724411	0	0	0.0000	78	77	2.17	2.06	1.01
CM015574.1_RaGOO	23000	45724411	0	0	0.0000	49	46	1.35	1.24	1.05
CM015574.1_RaGOO	24000	45724411	0	0	0.0000	50	45	1.38	1.20	1.11
CM015574.1_RaGOO	25000	45724411	0	0	0.0066	44	44	1.21	1.17	0.99
CM015574.1_RaGOO	26000	45724411	0	0	0.0000	42	42	1.17	1.12	1.00
CM015574.1_RaGOO	27000	45724411	0	0	0.0000	51	47	1.43	1.26	1.09
CM015574.1_RaGOO	28000	45724411	0	0	0.0000	45	50	1.26	1.33	0.91
CM015574.1_RaGOO	29000	45724411	0	0	0.0000	44	45	1.23	1.21	0.97
CM015574.1_RaGOO	30000	45724411	0	0	0.0000	39	44	1.10	1.19	0.89
CM015574.1_RaGOO	31000	45724411	0	0	0.0000	41	48	1.14	1.28	0.86
CM015574.1_RaGOO	32000	45724411	0	0	0.0000	37	47	1.04	1.26	0.80
CM015574.1_RaGOO	33000	45724411	0	0	0.0000	45	43	1.26	1.14	1.06
CM015574.1_RaGOO	34000	45724411	0	0	0.0000	38	38	1.05	1.01	1.00
CM015574.1_RaGOO	35000	45724411	0	0	0.0000	39	35	1.09	0.93	1.13
CM015574.1_RaGOO	36000	45724411	0	0	0.0000	33	35	0.91	0.94	0.93
CM015574.1_RaGOO	37000	45724411	0	0	0.0000	32	37	0.89	0.99	0.87
CM015574.1_RaGOO	38000	45724411	0	0	0.0000	36	37	1.01	0.99	0.98
CM015574.1_RaGOO	39000	45724411	0	0	0.0000	34	34	0.94	0.91	0.99
CM015574.1_RaGOO	40000	45724411	0	0	0.0000	36	43	1.01	1.15	0.84
CM015574.1_RaGOO	41000	45724411	0	0	0.0000	36	34	0.99	0.90	1.06
CM015574.1_RaGOO	42000	45724411	0	0	0.0000	35	39	0.98	1.03	0.91
CM015574.1_RaGOO	43000	45724411	0	0	0.0124	32	38	0.89	1.01	0.84
CM015574.1_RaGOO	44000	45724411	0	0	0.0000	28	30	0.77	0.81	0.92
CM015574.1_RaGOO	45000	45724411	0	0	0.0105	25	32	0.71	0.86	0.79
CM015574.1_RaGOO	46000	45724411	0	0	0.0000	25	29	0.70	0.78	0.87
CM015574.1_RaGOO	47000	45724411	0	0	0.0000	26	27	0.73	0.73	0.95
CM015574.1_RaGOO	48000	45724411	0	0	0.0000	27	35	0.74	0.93	0.77
CM015574.1_RaGOO	49000	45724411	0	0	0.0000	27	35	0.74	0.94	0.76
CM015574.1_RaGOO	50000	45724411	0	0	0.0000	26	31	0.71	0.82	0.83
CM015574.1_RaGOO	51000	45724411	0	0	0.0000	26	32	0.71	0.85	0.81
CM015574.1_RaGOO	52000	45724411	0	0	0.0000	30	34	0.84	0.91	0.88
CM015574.1_RaGOO	53000	45724411	0	0	0.0000	30	31	0.82	0.83	0.95
CM015574.1_RaGOO	54000	45724411	0	0	0.0000	29	28	0.80	0.74	1.03
CM015574.1_RaGOO	55000	45724411	0	0	0.0000	28	36	0.78	0.97	0.78
CM015574.1_RaGOO	56000	45724411	0	0	0.0208	38	37	1.05	0.98	1.03
CM015574.1_RaGOO	57000	45724411	0	0	0.0013	38	34	1.04	0.92	1.09
CM015574.1_RaGOO	58000	45724411	0	0	0.0000	40	35	1.11	0.95	1.13
CM015574.1_RaGOO	59000	45724411	0	0	0.0000	33	32	0.91	0.85	1.03
CM015574.1_RaGOO	60000	45724411	0	0	0.0104	40	41	1.11	1.09	0.98
CM015574.1_RaGOO	61000	45724411	0	0	0.0000	39	35	1.09	0.93	1.13
CM015574.1_RaGOO	62000	45724411	0	0	0.0000	39	45	1.09	1.22	0.86
CM015574.1_RaGOO	63000	45724411	0	0	0.0000	47	51	1.32	1.37	0.92
CM015574.1_RaGOO	64000	45724411	0	0	0.0000	39	38	1.09	1.00	1.05
CM015574.1_RaGOO	65000	45724411	0	0	0.0057	42	40	1.18	1.08	1.05
CM015574.1_RaGOO	66000	45724411	0	0	0.0000	41	43	1.14	1.16	0.94
CM015574.1_RaGOO	67000	45724411	0	0	0.0221	35	39	0.98	1.05	0.90
CM015574.1_RaGOO	68000	45724411	0	0	0.0000	40	38	1.11	1.02	1.05
CM015574.1_RaGOO	69000	45724411	0	0	0.0000	34	40	0.94	1.06	0.85
CM015574.1_RaGOO	70000	45724411	0	0	0.0053	31	37	0.87	0.99	0.84
CM015574.1_RaGOO	71000	45724411	0	0	0.0000	35	39	0.98	1.04	0.90
CM015574.1_RaGOO	72000	45724411	0	0	0.0000	35	41	0.99	1.09	0.87
CM015574.1_RaGOO	73000	45724411	1	1	0.0059	30	35	0.85	0.94	0.86
CM015574.1_RaGOO	74000	45724411	0	0	0.0000	38	35	1.06	0.93	1.09
CM015574.1_RaGOO	75000	45724411	0	0	0.0000	31	34	0.86	0.92	0.90
CM015574.1_RaGOO	76000	45724411	0	0	0.0000	38	36	1.06	0.97	1.05
CM015574.1_RaGOO	77000	45724411	0	0	0.0000	30	32	0.84	0.86	0.94
CM015574.1_RaGOO	78000	45724411	0	0	0.0000	34	33	0.95	0.89	1.03
CM015574.1_RaGOO	79000	45724411	0	0	0.0000	36	36	1.00	0.96	1.00
CM015574.1_RaGOO	80000	45724411	0	0	0.0000	35	33	0.97	0.89	1.05
CM015574.1_RaGOO	81000	45724411	0	0	0.0000	27	30	0.74	0.81	0.88
CM015574.1_RaGOO	82000	45724411	0	0	0.0000	30	39	0.82	1.04	0.76
CM015574.1_RaGOO	83000	45724411	0	0	0.0000	32	32	0.90	0.85	1.02
CM015574.1_RaGOO	84000	45724411	0	0	0.0000	35	36	0.98	0.96	0.99
CM015574.1_RaGOO	85000	45724411	0	0	0.0086	31	35	0.86	0.94	0.88
CM015574.1_RaGOO	86000	45724411	0	0	0.0000	31	34	0.86	0.91	0.91
CM015574.1_RaGOO	87000	45724411	0	0	0.0000	34	31	0.95	0.83	1.10
CM015574.1_RaGOO	88000	45724411	0	0	0.0000	30	33	0.84	0.89	0.90
CM015574.1_RaGOO	89000	45724411	0	0	0.0000	26	28	0.73	0.76	0.93
CM015574.1_RaGOO	90000	45724411	0	0	0.0339	28	38	0.77	1.03	0.72
CM015574.1_RaGOO	91000	45724411	0	0	0.0000	29	35	0.80	0.93	0.82
CM015574.1_RaGOO	92000	45724411	0	0	0.0000	37	35	1.02	0.95	1.03
CM015574.1_RaGOO	93000	45724411	0	0	0.0000	23	22	0.63	0.60	1.00
CM015574.1_RaGOO	94000	45724411	0	0	0.0000	30	33	0.83	0.88	0.91
CM015574.1_RaGOO	95000	45724411	0	0	0.0000	32	38	0.90	1.00	0.86
CM015574.1_RaGOO	96000	45724411	0	0	0.0000	36	31	1.01	0.83	1.17
CM015574.1_RaGOO	97000	45724411	0	0	0.0000	41	37	1.14	0.99	1.10
CM015574.1_RaGOO	98000	45724411	0	0	0.0000	39	45	1.09	1.20	0.87
CM015574.1_RaGOO	99000	45724411	0	0	0.0000	36	37	1.01	0.99	0.98
CM015574.1_RaGOO	100000	45724411	0	0	0.0000	40	43	1.12	1.16	0.93
CM015574.1_RaGOO	101000	45724411	0	0	0.0000	35	38	0.97	1.01	0.92
CM015574.1_RaGOO	102000	45724411	0	0	0.0254	32	38	0.89	1.01	0.84
CM015574.1_RaGOO	103000	45724411	0	0	0.0000	43	46	1.20	1.24	0.92
CM015574.1_RaGOO	104000	45724411	0	0	0.0000	38	37	1.06	0.98	1.04
CM015574.1_RaGOO	105000	45724411	0	0	0.0000	33	38	0.92	1.02	0.87
CM015574.1_RaGOO	106000	45724411	0	0	0.0000	32	34	0.88	0.91	0.93
CM015574.1_RaGOO	107000	45724411	0	0	0.0000	30	33	0.82	0.88	0.90
CM015574.1_RaGOO	108000	45724411	0	0	0.0000	31	26	0.87	0.71	1.17
CM015574.1_RaGOO	109000	45724411	0	0	0.0000	30	33	0.85	0.88	0.93
CM015574.1_RaGOO	110000	45724411	0	0	0.0000	25	37	0.71	0.98	0.70
CM015574.1_RaGOO	111000	45724411	0	0	0.0000	26	37	0.74	0.98	0.72
CM015574.1_RaGOO	112000	45724411	0	0	0.0000	29	28	0.82	0.76	1.03
CM015574.1_RaGOO	113000	45724411	0	0	0.0000	31	28	0.87	0.76	1.09
CM015574.1_RaGOO	114000	45724411	0	0	0.0000	27	31	0.76	0.83	0.88
CM015574.1_RaGOO	115000	45724411	0	0	0.0000	29	31	0.81	0.83	0.93
CM015574.1_RaGOO	116000	45724411	0	0	0.0000	29	32	0.81	0.87	0.89
CM015574.1_RaGOO	117000	45724411	0	0	0.0000	36	31	1.01	0.82	1.19
CM015574.1_RaGOO	118000	45724411	0	0	0.0000	38	36	1.05	0.96	1.06
CM015574.1_RaGOO	119000	45724411	0	0	0.0000	34	33	0.94	0.89	1.01
CM015574.1_RaGOO	120000	45724411	0	0	0.0085	32	33	0.90	0.88	0.99
CM015574.1_RaGOO	121000	45724411	0	0	0.0000	33	31	0.93	0.82	1.09
CM015574.1_RaGOO	122000	45724411	0	0	0.0000	32	33	0.88	0.89	0.95
CM015574.1_RaGOO	123000	45724411	0	0	0.0213	33	39	0.91	1.04	0.84
CM015574.1_RaGOO	124000	45724411	0	0	0.0000	32	36	0.88	0.96	0.88
CM015574.1_RaGOO	125000	45724411	0	0	0.0000	11	9	0.32	0.25	1.23
CM015574.1_RaGOO	126000	45724411	0	0	0.0000	42	44	1.18	1.17	0.97
CM015574.1_RaGOO	127000	45724411	0	0	0.0104	31	31	0.86	0.84	0.99
CM015574.1_RaGOO	128000	45724411	0	0	0.0000	35	40	0.97	1.06	0.88
CM015574.1_RaGOO	129000	45724411	0	0	0.0000	35	38	0.96	1.02	0.91
CM015574.1_RaGOO	130000	45724411	0	0	0.0000	37	41	1.03	1.10	0.90
CM015574.1_RaGOO	131000	45724411	0	0	0.0000	36	39	1.01	1.04	0.93
CM015574.1_RaGOO	132000	45724411	0	0	0.0000	42	44	1.18	1.17	0.96
CM015574.1_RaGOO	133000	45724411	0	0	0.0000	57	70	1.59	1.88	0.81
CM015574.1_RaGOO	134000	45724411	0	0	0.0000	5	7	0.15	0.18	0.80
CM015574.1_RaGOO	135000	45724411	0	0	0.0000	3	4	0.09	0.11	0.76
CM015574.1_RaGOO	136000	45724411	0	0	0.0000	0	0	0.01	0.01	1.39
CM015574.1_RaGOO	137000	45724411	0	0	0.0000	0	0	0.00	0.01	0.51
CM015574.1_RaGOO	138000	45724411	0	0	0.0000	16	17	0.46	0.45	0.98
CM015574.1_RaGOO	139000	45724411	0	2	0.0000	38	37	1.05	0.99	1.02
CM015574.1_RaGOO	140000	45724411	0	0	0.0000	37	42	1.02	1.12	0.88
CM015574.1_RaGOO	141000	45724411	0	0	0.0000	33	40	0.91	1.08	0.81
CM015574.1_RaGOO	142000	45724411	0	0	0.0129	32	35	0.89	0.94	0.92
CM015574.1_RaGOO	143000	45724411	0	0	0.0271	37	31	1.03	0.83	1.19
CM015574.1_RaGOO	144000	45724411	0	0	0.0000	40	40	1.11	1.06	1.01
CM015574.1_RaGOO	145000	45724411	0	0	0.0000	37	35	1.04	0.94	1.07
CM015574.1_RaGOO	146000	45724411	0	0	0.0000	35	35	0.98	0.95	1.00
CM015574.1_RaGOO	147000	45724411	0	0	0.0000	36	39	1.01	1.05	0.92
CM015574.1_RaGOO	148000	45724411	0	0	0.0000	40	36	1.12	0.95	1.13
CM015574.1_RaGOO	149000	45724411	0	0	0.0000	32	27	0.90	0.73	1.18
CM015574.1_RaGOO	150000	45724411	0	0	0.0000	28	32	0.78	0.87	0.87
CM015574.1_RaGOO	151000	45724411	0	0	0.0000	29	36	0.82	0.95	0.82
CM015574.1_RaGOO	152000	45724411	0	0	0.0000	30	34	0.84	0.90	0.89
CM015574.1_RaGOO	153000	45724411	0	0	0.0000	34	41	0.96	1.10	0.84
CM015574.1_RaGOO	154000	45724411	0	0	0.0000	34	44	0.93	1.17	0.77
CM015574.1_RaGOO	155000	45724411	0	0	0.0000	28	38	0.79	1.02	0.74
CM015574.1_RaGOO	156000	45724411	0	0	0.0000	30	34	0.82	0.91	0.86
CM015574.1_RaGOO	157000	45724411	0	0	0.0000	29	28	0.79	0.75	1.02
CM015574.1_RaGOO	158000	45724411	0	0	0.0000	33	33	0.92	0.87	1.01
CM015574.1_RaGOO	159000	45724411	0	0	0.0000	37	29	1.03	0.78	1.27
CM015574.1_RaGOO	160000	45724411	0	0	0.0000	34	33	0.95	0.89	1.02
CM015574.1_RaGOO	161000	45724411	0	0	0.0000	38	29	1.05	0.79	1.28
CM015574.1_RaGOO	162000	45724411	0	0	0.0000	31	36	0.87	0.97	0.87
CM015574.1_RaGOO	163000	45724411	0	0	0.0000	36	36	1.01	0.95	1.02
CM015574.1_RaGOO	164000	45724411	0	0	0.0000	37	36	1.04	0.98	1.03
CM015574.1_RaGOO	165000	45724411	0	0	0.0000	32	32	0.88	0.87	0.97
CM015574.1_RaGOO	166000	45724411	0	0	0.0000	35	34	0.96	0.92	1.00
CM015574.1_RaGOO	167000	45724411	0	0	0.0117	38	44	1.05	1.18	0.86
CM015574.1_RaGOO	168000	45724411	0	0	0.0000	34	35	0.96	0.93	0.99
CM015574.1_RaGOO	169000	45724411	0	0	0.0000	36	32	1.00	0.85	1.13
CM015574.1_RaGOO	170000	45724411	0	2	0.0000	21	23	0.59	0.62	0.92
CM015574.1_RaGOO	171000	45724411	0	0	0.0000	34	34	0.96	0.90	1.01
CM015574.1_RaGOO	172000	45724411	0	0	0.0000	30	37	0.84	1.00	0.81
CM015574.1_RaGOO	173000	45724411	0	0	0.0000	33	31	0.93	0.82	1.08
CM015574.1_RaGOO	174000	45724411	0	0	0.0000	31	32	0.85	0.87	0.94
CM015574.1_RaGOO	175000	45724411	0	1	0.0000	29	29	0.80	0.77	1.00
CM015574.1_RaGOO	176000	45724411	0	0	0.0000	38	35	1.07	0.94	1.09
CM015574.1_RaGOO	177000	45724411	0	0	0.0000	29	31	0.82	0.82	0.96
CM015574.1_RaGOO	178000	45724411	0	0	0.0000	24	24	0.66	0.64	0.99
CM015574.1_RaGOO	179000	45724411	0	0	0.0000	24	30	0.67	0.81	0.79
CM015574.1_RaGOO	180000	45724411	0	0	0.0000	27	33	0.76	0.89	0.82
CM015574.1_RaGOO	181000	45724411	0	0	0.0000	27	27	0.74	0.73	0.99
CM015574.1_RaGOO	182000	45724411	0	0	0.0337	29	30	0.80	0.80	0.97
CM015574.1_RaGOO	183000	45724411	0	0	0.0170	30	30	0.82	0.81	0.98
CM015574.1_RaGOO	184000	45724411	0	0	0.0000	39	40	1.07	1.07	0.97
CM015574.1_RaGOO	185000	45724411	1	0	0.0000	29	33	0.80	0.87	0.88
CM015574.1_RaGOO	186000	45724411	0	0	0.0000	26	35	0.74	0.93	0.76
CM015574.1_RaGOO	187000	45724411	0	0	0.0000	38	36	1.06	0.97	1.05
CM015574.1_RaGOO	188000	45724411	0	0	0.0000	35	38	0.97	1.03	0.91
CM015574.1_RaGOO	189000	45724411	0	0	0.0000	36	33	1.01	0.88	1.10
CM015574.1_RaGOO	190000	45724411	0	0	0.0000	38	33	1.07	0.89	1.16
CM015574.1_RaGOO	191000	45724411	0	0	0.0000	37	34	1.02	0.92	1.07
CM015574.1_RaGOO	192000	45724411	0	0	0.0000	31	31	0.87	0.84	1.00
CM015574.1_RaGOO	193000	45724411	0	0	0.0155	29	37	0.81	0.98	0.79
CM015574.1_RaGOO	194000	45724411	1	0	0.0000	34	33	0.94	0.89	1.02
CM015574.1_RaGOO	195000	45724411	4	0	0.0000	30	31	0.84	0.82	0.98
CM015574.1_RaGOO	196000	45724411	0	0	0.0000	37	40	1.04	1.06	0.95
CM015574.1_RaGOO	197000	45724411	0	0	0.0000	41	35	1.14	0.94	1.16
CM015574.1_RaGOO	198000	45724411	0	0	0.0000	37	36	1.03	0.98	1.02
CM015574.1_RaGOO	199000	45724411	0	0	0.0000	37	38	1.03	1.02	0.97
CM015574.1_RaGOO	200000	45724411	0	0	0.0000	35	32	0.97	0.87	1.08
CM015574.1_RaGOO	201000	45724411	0	0	0.0000	33	37	0.92	0.98	0.90
CM015574.1_RaGOO	202000	45724411	0	0	0.0000	37	35	1.04	0.93	1.08
CM015574.1_RaGOO	203000	45724411	0	0	0.0000	50	51	1.40	1.36	0.99
CM015574.1_RaGOO	204000	45724411	0	0	0.0000	39	42	1.08	1.11	0.93
CM015574.1_RaGOO	205000	45724411	0	0	0.0000	42	38	1.18	1.02	1.11
CM015574.1_RaGOO	206000	45724411	0	0	0.0000	37	36	1.04	0.96	1.04
CM015574.1_RaGOO	207000	45724411	0	0	0.0000	37	35	1.03	0.94	1.05
CM015574.1_RaGOO	208000	45724411	0	0	0.0000	41	35	1.14	0.92	1.18
CM015574.1_RaGOO	209000	45724411	0	0	0.0000	37	32	1.02	0.85	1.15
CM015574.1_RaGOO	210000	45724411	0	0	0.0000	31	38	0.86	1.03	0.81
CM015574.1_RaGOO	211000	45724411	0	0	0.0000	37	35	1.02	0.94	1.04
CM015574.1_RaGOO	212000	45724411	0	0	0.0000	25	40	0.69	1.08	0.62
CM015574.1_RaGOO	213000	45724411	0	0	0.0000	30	35	0.84	0.94	0.86
CM015574.1_RaGOO	214000	45724411	0	0	0.0000	32	38	0.89	1.03	0.83
CM015574.1_RaGOO	215000	45724411	0	0	0.0000	32	40	0.89	1.06	0.81
CM015574.1_RaGOO	216000	45724411	0	0	0.0000	27	30	0.76	0.80	0.92
CM015574.1_RaGOO	217000	45724411	0	0	0.0000	27	31	0.76	0.83	0.88
CM015574.1_RaGOO	218000	45724411	0	0	0.0000	31	37	0.85	1.00	0.82
CM015574.1_RaGOO	219000	45724411	0	0	0.0000	34	35	0.96	0.94	0.97
CM015574.1_RaGOO	220000	45724411	0	0	0.0000	33	36	0.93	0.96	0.92
CM015574.1_RaGOO	221000	45724411	0	0	0.0000	40	32	1.11	0.86	1.24
CM015574.1_RaGOO	222000	45724411	0	0	0.0034	42	44	1.16	1.17	0.95
CM015574.1_RaGOO	223000	45724411	0	0	0.0000	32	44	0.90	1.19	0.73
CM015574.1_RaGOO	224000	45724411	0	0	0.0000	37	36	1.04	0.95	1.05
CM015574.1_RaGOO	225000	45724411	0	0	0.0073	34	39	0.96	1.05	0.88
CM015574.1_RaGOO	226000	45724411	0	0	0.0000	43	33	1.20	0.88	1.31
CM015574.1_RaGOO	227000	45724411	0	0	0.0061	33	33	0.93	0.88	1.01
CM015574.1_RaGOO	228000	45724411	0	0	0.0000	33	34	0.92	0.92	0.96
CM015574.1_RaGOO	229000	45724411	0	0	0.0000	42	36	1.18	0.96	1.18
CM015574.1_RaGOO	230000	45724411	0	0	0.0117	42	37	1.18	1.00	1.13
CM015574.1_RaGOO	231000	45724411	0	0	0.0000	43	40	1.19	1.07	1.07
CM015574.1_RaGOO	232000	45724411	0	0	0.0000	36	38	1.01	1.02	0.94
CM015574.1_RaGOO	233000	45724411	0	0	0.0233	36	34	1.00	0.92	1.04
CM015574.1_RaGOO	234000	45724411	0	0	0.0000	36	37	1.01	0.99	0.98
CM015574.1_RaGOO	235000	45724411	0	0	0.0000	42	42	1.18	1.12	1.01
CM015574.1_RaGOO	236000	45724411	0	0	0.0000	32	36	0.89	0.97	0.88
CM015574.1_RaGOO	237000	45724411	0	0	0.0000	26	28	0.71	0.75	0.92
CM015574.1_RaGOO	238000	45724411	0	0	0.0000	32	35	0.89	0.93	0.92
CM015574.1_RaGOO	239000	45724411	0	0	0.0000	35	32	0.99	0.87	1.09
CM015574.1_RaGOO	240000	45724411	0	0	0.0000	18	20	0.51	0.54	0.90
CM015574.1_RaGOO	241000	45724411	0	0	0.0000	12	16	0.34	0.44	0.74
CM015574.1_RaGOO	242000	45724411	0	0	0.0000	35	40	0.96	1.06	0.87
CM015574.1_RaGOO	243000	45724411	0	0	0.0000	29	31	0.81	0.84	0.93
CM015574.1_RaGOO	244000	45724411	0	0	0.0000	31	30	0.85	0.81	1.00
CM015574.1_RaGOO	245000	45724411	0	1	0.0000	24	26	0.66	0.68	0.93
CM015574.1_RaGOO	246000	45724411	0	0	0.0000	30	34	0.83	0.92	0.87
CM015574.1_RaGOO	247000	45724411	0	0	0.0000	29	30	0.82	0.81	0.97
CM015574.1_RaGOO	248000	45724411	0	0	0.0000	27	31	0.74	0.84	0.85
CM015574.1_RaGOO	249000	45724411	0	0	0.0000	28	26	0.78	0.70	1.06
CM015574.1_RaGOO	250000	45724411	0	0	0.0000	31	28	0.86	0.74	1.12
CM015574.1_RaGOO	251000	45724411	0	0	0.0000	31	31	0.87	0.82	1.02
CM015574.1_RaGOO	252000	45724411	0	0	0.0000	30	33	0.84	0.89	0.91
CM015574.1_RaGOO	253000	45724411	0	0	0.0000	29	37	0.82	0.99	0.79
CM015574.1_RaGOO	254000	45724411	0	0	0.0000	28	35	0.78	0.93	0.80
CM015574.1_RaGOO	255000	45724411	0	0	0.0032	31	30	0.86	0.82	1.01
CM015574.1_RaGOO	256000	45724411	0	0	0.0000	26	32	0.72	0.85	0.82
CM015574.1_RaGOO	257000	45724411	0	0	0.0000	33	36	0.92	0.95	0.92
CM015574.1_RaGOO	258000	45724411	0	0	0.0000	31	32	0.87	0.85	0.99
CM015574.1_RaGOO	259000	45724411	0	0	0.0000	31	31	0.85	0.83	0.98
CM015574.1_RaGOO	260000	45724411	0	0	0.0000	31	31	0.85	0.82	1.00
CM015574.1_RaGOO	261000	45724411	0	0	0.0000	28	31	0.78	0.82	0.92
CM015574.1_RaGOO	262000	45724411	0	0	0.0000	26	38	0.72	1.02	0.67
CM015574.1_RaGOO	263000	45724411	0	0	0.0000	29	38	0.81	1.00	0.78
CM015574.1_RaGOO	264000	45724411	0	0	0.0000	29	30	0.82	0.80	0.98
CM015574.1_RaGOO	265000	45724411	0	0	0.0000	34	35	0.95	0.95	0.96
CM015574.1_RaGOO	266000	45724411	0	0	0.0000	32	36	0.89	0.97	0.88
CM015574.1_RaGOO	267000	45724411	0	0	0.0000	26	28	0.72	0.75	0.92
CM015574.1_RaGOO	268000	45724411	0	0	0.0000	29	31	0.81	0.84	0.92
CM015574.1_RaGOO	269000	45724411	0	0	0.0000	27	25	0.76	0.67	1.08
CM015574.1_RaGOO	270000	45724411	0	0	0.0000	30	31	0.84	0.82	0.98
CM015574.1_RaGOO	271000	45724411	0	0	0.0000	30	33	0.84	0.88	0.91
CM015574.1_RaGOO	272000	45724411	0	0	0.0125	29	32	0.80	0.85	0.91
CM015574.1_RaGOO	273000	45724411	0	0	0.0029	32	35	0.88	0.94	0.90
CM015574.1_RaGOO	274000	45724411	0	0	0.0024	34	41	0.96	1.09	0.85
CM015574.1_RaGOO	275000	45724411	0	0	0.0000	30	27	0.83	0.73	1.09
CM015574.1_RaGOO	276000	45724411	0	0	0.0117	32	33	0.89	0.88	0.97
CM015574.1_RaGOO	277000	45724411	0	0	0.0000	32	28	0.90	0.75	1.15
CM015574.1_RaGOO	278000	45724411	0	0	0.0000	32	32	0.89	0.87	0.99
CM015574.1_RaGOO	279000	45724411	0	0	0.0000	35	38	0.98	1.01	0.93
CM015574.1_RaGOO	280000	45724411	0	0	0.0070	35	37	0.96	0.99	0.94
CM015574.1_RaGOO	281000	45724411	0	2	0.0000	23	23	0.63	0.61	1.00
CM015574.1_RaGOO	282000	45724411	0	0	0.0000	32	35	0.90	0.93	0.93
CM015574.1_RaGOO	283000	45724411	0	0	0.0000	35	37	0.99	0.98	0.97
CM015574.1_RaGOO	284000	45724411	0	0	0.0000	33	35	0.91	0.93	0.94
CM015574.1_RaGOO	285000	45724411	0	2	0.0000	33	27	0.92	0.73	1.22
CM015574.1_RaGOO	286000	45724411	0	0	0.0000	28	34	0.79	0.91	0.83
CM015574.1_RaGOO	287000	45724411	0	0	0.0000	28	35	0.79	0.94	0.81
CM015574.1_RaGOO	288000	45724411	0	0	0.0000	37	42	1.03	1.12	0.88
CM015574.1_RaGOO	289000	45724411	0	0	0.0000	29	36	0.81	0.96	0.81
CM015574.1_RaGOO	290000	45724411	0	0	0.0000	31	38	0.87	1.01	0.83
CM015574.1_RaGOO	291000	45724411	1	0	0.0031	28	33	0.78	0.89	0.84
CM015574.1_RaGOO	292000	45724411	0	0	0.0000	28	32	0.79	0.85	0.90
CM015574.1_RaGOO	293000	45724411	0	0	0.0000	31	32	0.87	0.87	0.96
CM015574.1_RaGOO	294000	45724411	0	0	0.0000	34	29	0.95	0.79	1.16
CM015574.1_RaGOO	295000	45724411	0	0	0.0000	38	37	1.05	1.00	1.01
CM015574.1_RaGOO	296000	45724411	0	0	0.0000	38	37	1.05	0.99	1.01
CM015574.1_RaGOO	297000	45724411	0	0	0.0000	47	34	1.31	0.90	1.40
CM015574.1_RaGOO	298000	45724411	0	0	0.0000	40	35	1.10	0.94	1.12
CM015574.1_RaGOO	299000	45724411	0	0	0.0000	32	41	0.88	1.08	0.78
CM015574.1_RaGOO	300000	45724411	0	0	0.0000	28	31	0.77	0.84	0.89
CM015574.1_RaGOO	301000	45724411	0	0	0.0000	24	30	0.67	0.79	0.82
CM015574.1_RaGOO	302000	45724411	0	0	0.0020	28	32	0.78	0.86	0.88
CM015574.1_RaGOO	303000	45724411	0	0	0.0000	25	33	0.68	0.88	0.75
CM015574.1_RaGOO	304000	45724411	0	0	0.0000	32	35	0.90	0.92	0.93
CM015574.1_RaGOO	305000	45724411	0	0	0.0000	31	29	0.85	0.78	1.05
CM015574.1_RaGOO	306000	45724411	0	0	0.0000	35	30	0.98	0.81	1.17
CM015574.1_RaGOO	307000	45724411	0	0	0.0000	36	30	1.01	0.81	1.20
CM015574.1_RaGOO	308000	45724411	0	0	0.0000	29	28	0.81	0.75	1.04
CM015574.1_RaGOO	309000	45724411	0	1	0.0000	20	26	0.56	0.69	0.77
CM015574.1_RaGOO	310000	45724411	0	0	0.0000	28	28	0.78	0.75	0.99
CM015574.1_RaGOO	311000	45724411	1	0	0.0000	22	19	0.62	0.51	1.17
CM015574.1_RaGOO	312000	45724411	0	0	0.0000	35	44	0.99	1.18	0.80
CM015574.1_RaGOO	313000	45724411	0	0	0.0000	24	35	0.68	0.93	0.70
CM015574.1_RaGOO	314000	45724411	0	0	0.0000	28	28	0.78	0.74	1.01
CM015574.1_RaGOO	315000	45724411	0	0	0.0000	34	36	0.95	0.97	0.94
CM015574.1_RaGOO	316000	45724411	0	0	0.0000	30	31	0.85	0.83	0.98
CM015574.1_RaGOO	317000	45724411	0	0	0.0000	37	40	1.02	1.08	0.91
CM015574.1_RaGOO	318000	45724411	0	0	0.0000	34	39	0.94	1.03	0.88
CM015574.1_RaGOO	319000	45724411	0	0	0.0000	39	47	1.09	1.26	0.83
CM015574.1_RaGOO	320000	45724411	0	0	0.0000	35	33	0.97	0.90	1.04
CM015574.1_RaGOO	321000	45724411	0	0	0.0000	33	35	0.93	0.95	0.94
CM015574.1_RaGOO	322000	45724411	0	0	0.0000	41	37	1.13	0.99	1.10
CM015574.1_RaGOO	323000	45724411	0	0	0.0017	33	35	0.93	0.94	0.95
CM015574.1_RaGOO	324000	45724411	0	0	0.0000	24	23	0.66	0.60	1.04
CM015574.1_RaGOO	325000	45724411	0	0	0.0004	31	33	0.87	0.89	0.94
CM015574.1_RaGOO	326000	45724411	0	0	0.0000	28	27	0.77	0.71	1.04
CM015574.1_RaGOO	327000	45724411	0	0	0.0000	28	34	0.77	0.92	0.81
CM015574.1_RaGOO	328000	45724411	0	0	0.0000	31	33	0.87	0.89	0.94
CM015574.1_RaGOO	329000	45724411	0	0	0.0000	26	35	0.73	0.93	0.76
CM015574.1_RaGOO	330000	45724411	0	0	0.0000	32	29	0.89	0.78	1.09
CM015574.1_RaGOO	331000	45724411	0	0	0.0000	30	33	0.83	0.89	0.91
CM015574.1_RaGOO	332000	45724411	0	0	0.0000	30	34	0.83	0.91	0.87
CM015574.1_RaGOO	333000	45724411	0	0	0.0116	27	31	0.76	0.82	0.89
CM015574.1_RaGOO	334000	45724411	0	0	0.0000	34	32	0.95	0.86	1.06
CM015574.1_RaGOO	335000	45724411	0	0	0.0000	19	24	0.52	0.65	0.77
CM015574.1_RaGOO	336000	45724411	0	0	0.0168	23	25	0.64	0.68	0.90
CM015574.1_RaGOO	337000	45724411	0	0	0.0000	36	34	1.00	0.90	1.07
CM015574.1_RaGOO	338000	45724411	0	0	0.0000	30	32	0.83	0.86	0.93
CM015574.1_RaGOO	339000	45724411	0	0	0.0000	29	34	0.81	0.91	0.86
CM015574.1_RaGOO	340000	45724411	0	0	0.0000	29	31	0.81	0.84	0.93
CM015574.1_RaGOO	341000	45724411	0	0	0.0000	31	29	0.87	0.78	1.07
CM015574.1_RaGOO	342000	45724411	0	0	0.0000	37	37	1.04	0.99	1.01
CM015574.1_RaGOO	343000	45724411	0	0	0.0000	36	38	0.99	1.03	0.93
CM015574.1_RaGOO	344000	45724411	0	0	0.0000	29	37	0.81	0.99	0.78
CM015574.1_RaGOO	345000	45724411	0	4	0.0000	26	32	0.74	0.85	0.83
CM015574.1_RaGOO	346000	45724411	0	0	0.0024	33	36	0.92	0.95	0.93
CM015574.1_RaGOO	347000	45724411	0	0	0.0000	32	35	0.89	0.94	0.91
CM015574.1_RaGOO	348000	45724411	0	0	0.0000	35	36	0.97	0.97	0.97
CM015574.1_RaGOO	349000	45724411	0	0	0.0000	30	30	0.83	0.79	1.01
CM015574.1_RaGOO	350000	45724411	0	0	0.0000	41	43	1.15	1.14	0.97
CM015574.1_RaGOO	351000	45724411	0	0	0.0065	35	39	0.97	1.04	0.90
CM015574.1_RaGOO	352000	45724411	0	0	0.0384	41	38	1.16	1.02	1.09
CM015574.1_RaGOO	353000	45724411	0	0	0.0000	39	39	1.10	1.05	1.00
CM015574.1_RaGOO	354000	45724411	0	0	0.0000	38	34	1.07	0.92	1.11
CM015574.1_RaGOO	355000	45724411	0	0	0.0000	32	36	0.88	0.97	0.87
CM015574.1_RaGOO	356000	45724411	0	0	0.0000	35	35	0.99	0.94	1.01
CM015574.1_RaGOO	357000	45724411	0	0	0.0000	38	35	1.05	0.95	1.07
CM015574.1_RaGOO	358000	45724411	0	0	0.0000	39	39	1.09	1.05	1.00
CM015574.1_RaGOO	359000	45724411	0	0	0.0000	53	57	1.49	1.53	0.94
CM015574.1_RaGOO	360000	45724411	0	0	0.0000	35	37	0.97	0.99	0.94
CM015574.1_RaGOO	361000	45724411	0	0	0.0153	36	31	1.01	0.84	1.16
CM015574.1_RaGOO	362000	45724411	0	0	0.0000	28	29	0.78	0.79	0.95
CM015574.1_RaGOO	363000	45724411	0	0	0.0000	36	33	1.01	0.89	1.09
CM015574.1_RaGOO	364000	45724411	0	0	0.0000	30	35	0.84	0.93	0.86
CM015574.1_RaGOO	365000	45724411	0	0	0.0000	33	32	0.92	0.87	1.02
CM015574.1_RaGOO	366000	45724411	0	0	0.0000	32	36	0.89	0.97	0.88
CM015574.1_RaGOO	367000	45724411	0	0	0.0000	27	30	0.74	0.80	0.89
CM015574.1_RaGOO	368000	45724411	0	0	0.0000	21	26	0.58	0.70	0.80
CM015574.1_RaGOO	369000	45724411	0	0	0.0000	28	27	0.79	0.73	1.03
CM015574.1_RaGOO	370000	45724411	0	0	0.0000	25	33	0.70	0.88	0.76
CM015574.1_RaGOO	371000	45724411	0	0	0.0000	20	30	0.55	0.81	0.65
CM015574.1_RaGOO	372000	45724411	0	0	0.0000	23	31	0.65	0.83	0.75
CM015574.1_RaGOO	373000	45724411	0	0	0.0000	27	28	0.74	0.76	0.94
CM015574.1_RaGOO	374000	45724411	0	0	0.0000	27	31	0.75	0.82	0.88
CM015574.1_RaGOO	375000	45724411	0	0	0.0000	28	29	0.78	0.78	0.96
CM015574.1_RaGOO	376000	45724411	0	0	0.0000	30	28	0.84	0.74	1.09
CM015574.1_RaGOO	377000	45724411	0	0	0.0000	31	38	0.88	1.02	0.82
CM015574.1_RaGOO	378000	45724411	0	0	0.0000	27	33	0.75	0.89	0.81
CM015574.1_RaGOO	379000	45724411	0	0	0.0000	33	30	0.93	0.79	1.12
CM015574.1_RaGOO	380000	45724411	0	0	0.0000	30	39	0.83	1.03	0.78
CM015574.1_RaGOO	381000	45724411	0	0	0.0000	34	33	0.95	0.88	1.05
CM015574.1_RaGOO	382000	45724411	0	0	0.0286	37	40	1.04	1.08	0.93
CM015574.1_RaGOO	383000	45724411	0	0	0.0000	38	43	1.06	1.16	0.88
CM015574.1_RaGOO	384000	45724411	0	0	0.0000	30	36	0.84	0.95	0.84
CM015574.1_RaGOO	385000	45724411	0	0	0.0000	35	38	0.97	1.01	0.92
CM015574.1_RaGOO	386000	45724411	0	0	0.0000	33	36	0.92	0.97	0.91
CM015574.1_RaGOO	387000	45724411	0	0	0.0000	27	37	0.76	0.99	0.74
CM015574.1_RaGOO	388000	45724411	0	0	0.0000	35	40	0.96	1.06	0.87
CM015574.1_RaGOO	389000	45724411	0	0	0.0999	31	30	0.86	0.81	1.03
CM015574.1_RaGOO	390000	45724411	0	0	0.0000	33	29	0.91	0.79	1.11
CM015574.1_RaGOO	391000	45724411	0	0	0.0000	29	34	0.80	0.91	0.85
CM015574.1_RaGOO	392000	45724411	0	0	0.0000	31	31	0.87	0.83	1.01
CM015574.1_RaGOO	393000	45724411	0	0	0.0000	37	37	1.02	0.99	0.98
CM015574.1_RaGOO	394000	45724411	0	0	0.0000	38	42	1.05	1.12	0.91
CM015574.1_RaGOO	395000	45724411	0	0	0.0000	45	48	1.26	1.29	0.94
CM015574.1_RaGOO	396000	45724411	0	0	0.0012	36	44	0.99	1.19	0.80
CM015574.1_RaGOO	397000	45724411	0	0	0.0000	16	18	0.43	0.49	0.85
CM015574.1_RaGOO	398000	45724411	0	0	0.0000	41	44	1.13	1.18	0.92
CM015574.1_RaGOO	399000	45724411	0	0	0.0038	45	38	1.25	1.03	1.17
CM015574.1_RaGOO	400000	45724411	0	0	0.0000	35	35	0.97	0.95	0.98
CM015574.1_RaGOO	401000	45724411	0	0	0.0000	29	33	0.81	0.88	0.89
CM015574.1_RaGOO	402000	45724411	0	0	0.0000	31	28	0.87	0.76	1.10
CM015574.1_RaGOO	403000	45724411	0	0	0.0000	24	26	0.66	0.70	0.91
CM015574.1_RaGOO	404000	45724411	0	0	0.0000	32	26	0.89	0.70	1.23
CM015574.1_RaGOO	405000	45724411	0	0	0.0030	26	26	0.74	0.69	1.03
CM015574.1_RaGOO	406000	45724411	0	0	0.0223	32	26	0.88	0.70	1.21
CM015574.1_RaGOO	407000	45724411	0	0	0.0000	28	30	0.79	0.81	0.94
CM015574.1_RaGOO	408000	45724411	0	0	0.0000	34	35	0.95	0.94	0.97
CM015574.1_RaGOO	409000	45724411	0	0	0.0000	29	33	0.80	0.88	0.88
CM015574.1_RaGOO	410000	45724411	0	0	0.0000	35	40	0.98	1.06	0.89
CM015574.1_RaGOO	411000	45724411	0	0	0.0000	14	16	0.39	0.42	0.89
CM015574.1_RaGOO	412000	45724411	0	0	0.0000	0	0	0.00	0.00	1.00
CM015574.1_RaGOO	413000	45724411	0	0	0.0000	0	0	0.00	0.00	1.00
CM015574.1_RaGOO	414000	45724411	0	0	0.0000	0	0	0.00	0.00	1.00
CM015574.1_RaGOO	415000	45724411	0	0	0.0000	11	12	0.29	0.32	0.89
CM015574.1_RaGOO	416000	45724411	0	0	0.0000	36	36	1.01	0.97	1.00
CM015574.1_RaGOO	417000	45724411	0	0	0.0000	37	40	1.03	1.06	0.93
CM015574.1_RaGOO	418000	45724411	0	0	0.0000	39	37	1.08	1.00	1.04
CM015574.1_RaGOO	419000	45724411	0	0	0.0000	37	34	1.02	0.92	1.07
CM015574.1_RaGOO	420000	45724411	0	0	0.0000	38	42	1.07	1.12	0.92
CM015574.1_RaGOO	421000	45724411	0	0	0.0000	34	32	0.94	0.86	1.05
CM015574.1_RaGOO	422000	45724411	0	0	0.0000	36	36	1.00	0.97	0.99
CM015574.1_RaGOO	423000	45724411	0	0	0.0000	38	36	1.05	0.96	1.05
CM015574.1_RaGOO	424000	45724411	0	0	0.0000	36	32	1.00	0.86	1.12
CM015574.1_RaGOO	425000	45724411	0	0	0.0000	35	37	0.99	0.98	0.97
CM015574.1_RaGOO	426000	45724411	0	0	0.0000	32	38	0.90	1.01	0.86
CM015574.1_RaGOO	427000	45724411	0	0	0.0000	32	35	0.89	0.93	0.92
CM015574.1_RaGOO	428000	45724411	0	0	0.0000	34	36	0.93	0.95	0.94
CM015574.1_RaGOO	429000	45724411	0	0	0.0000	36	38	1.00	1.02	0.94
CM015574.1_RaGOO	430000	45724411	0	0	0.0000	35	37	0.98	0.99	0.95
CM015574.1_RaGOO	431000	45724411	0	0	0.0000	36	39	1.01	1.05	0.93
CM015574.1_RaGOO	432000	45724411	0	0	0.0000	37	39	1.04	1.04	0.96
CM015574.1_RaGOO	433000	45724411	0	0	0.0000	36	35	1.00	0.93	1.03
CM015574.1_RaGOO	434000	45724411	0	0	0.0000	40	39	1.10	1.04	1.02
CM015574.1_RaGOO	435000	45724411	0	0	0.0000	32	38	0.89	1.02	0.84
CM015574.1_RaGOO	436000	45724411	0	0	0.0000	34	38	0.95	1.01	0.91
CM015574.1_RaGOO	437000	45724411	0	0	0.0000	40	44	1.10	1.19	0.89
CM015574.1_RaGOO	438000	45724411	0	0	0.0000	47	40	1.30	1.08	1.15
CM015574.1_RaGOO	439000	45724411	0	0	0.0000	37	37	1.02	1.00	0.98
CM015574.1_RaGOO	440000	45724411	0	0	0.0000	37	36	1.04	0.95	1.05
CM015574.1_RaGOO	441000	45724411	0	0	0.0000	39	42	1.07	1.12	0.92
CM015574.1_RaGOO	442000	45724411	0	0	0.0000	45	40	1.24	1.07	1.12
CM015574.1_RaGOO	443000	45724411	0	0	0.0000	40	40	1.10	1.08	0.99
CM015574.1_RaGOO	444000	45724411	0	0	0.0000	38	37	1.06	1.00	1.02
CM015574.1_RaGOO	445000	45724411	0	0	0.0000	38	35	1.06	0.94	1.08
CM015574.1_RaGOO	446000	45724411	0	0	0.0000	39	44	1.09	1.17	0.90
CM015574.1_RaGOO	447000	45724411	0	0	0.0000	40	37	1.11	0.98	1.09
CM015574.1_RaGOO	448000	45724411	0	0	0.0000	37	31	1.04	0.83	1.21
CM015574.1_RaGOO	449000	45724411	0	0	0.0000	34	31	0.95	0.82	1.12
CM015574.1_RaGOO	450000	45724411	0	0	0.0000	31	31	0.87	0.84	1.00
CM015574.1_RaGOO	451000	45724411	0	0	0.0000	38	30	1.05	0.81	1.25
CM015574.1_RaGOO	452000	45724411	0	0	0.0000	28	37	0.79	0.98	0.77
CM015574.1_RaGOO	453000	45724411	0	0	0.0000	32	37	0.90	0.99	0.87
CM015574.1_RaGOO	454000	45724411	0	0	0.0000	34	32	0.96	0.87	1.06
CM015574.1_RaGOO	455000	45724411	0	0	0.0000	38	34	1.07	0.92	1.12
CM015574.1_RaGOO	456000	45724411	0	0	0.0000	37	36	1.04	0.97	1.03
CM015574.1_RaGOO	457000	45724411	0	0	0.0000	43	38	1.19	1.02	1.12
CM015574.1_RaGOO	458000	45724411	0	0	0.0000	35	39	0.97	1.05	0.89
CM015574.1_RaGOO	459000	45724411	0	0	0.0000	34	40	0.95	1.07	0.85
CM015574.1_RaGOO	460000	45724411	0	0	0.0000	33	32	0.92	0.86	1.03
CM015574.1_RaGOO	461000	45724411	0	0	0.0000	36	37	1.00	0.98	0.98
CM015574.1_RaGOO	462000	45724411	0	0	0.0000	28	37	0.77	1.00	0.74
CM015574.1_RaGOO	463000	45724411	0	0	0.0000	37	34	1.02	0.92	1.07
CM015574.1_RaGOO	464000	45724411	0	0	0.0000	37	32	1.04	0.85	1.17
CM015574.1_RaGOO	465000	45724411	0	0	0.0000	29	39	0.82	1.05	0.75
CM015574.1_RaGOO	466000	45724411	0	0	0.0000	31	36	0.87	0.97	0.85
CM015574.1_RaGOO	467000	45724411	0	0	0.0000	39	33	1.10	0.88	1.20
CM015574.1_RaGOO	468000	45724411	0	0	0.0000	39	42	1.10	1.12	0.94
CM015574.1_RaGOO	469000	45724411	0	0	0.0000	43	42	1.19	1.11	1.03
CM015574.1_RaGOO	470000	45724411	0	0	0.0019	41	35	1.15	0.95	1.17
CM015574.1_RaGOO	471000	45724411	0	0	0.0000	8	6	0.22	0.17	1.23
CM015574.1_RaGOO	472000	45724411	0	0	0.0000	40	40	1.11	1.07	1.00
CM015574.1_RaGOO	473000	45724411	0	0	0.0000	41	39	1.13	1.03	1.05
CM015574.1_RaGOO	474000	45724411	0	0	0.0000	35	42	0.97	1.12	0.83
CM015574.1_RaGOO	475000	45724411	0	0	0.0000	42	41	1.17	1.09	1.03
CM015574.1_RaGOO	476000	45724411	0	4	0.0087	39	32	1.07	0.87	1.18
CM015574.1_RaGOO	477000	45724411	0	0	0.0000	37	34	1.02	0.90	1.09
CM015574.1_RaGOO	478000	45724411	0	0	0.0000	37	33	1.02	0.89	1.10
CM015574.1_RaGOO	479000	45724411	0	0	0.0000	26	30	0.73	0.81	0.87
CM015574.1_RaGOO	480000	45724411	0	0	0.0000	27	25	0.74	0.66	1.07
CM015574.1_RaGOO	481000	45724411	0	0	0.0114	21	21	0.58	0.56	0.99
CM015574.1_RaGOO	482000	45724411	0	0	0.0000	34	31	0.95	0.83	1.10
CM015574.1_RaGOO	483000	45724411	0	0	0.0000	33	33	0.93	0.88	1.02
CM015574.1_RaGOO	484000	45724411	0	0	0.0000	36	37	1.00	0.99	0.97
CM015574.1_RaGOO	485000	45724411	0	0	0.0000	32	35	0.89	0.93	0.92
CM015574.1_RaGOO	486000	45724411	0	0	0.0000	27	31	0.75	0.84	0.85
CM015574.1_RaGOO	487000	45724411	0	0	0.0000	7	9	0.19	0.25	0.76
CM015574.1_RaGOO	488000	45724411	0	0	0.0000	5	4	0.14	0.12	1.08
CM015574.1_RaGOO	489000	45724411	0	0	0.0000	38	39	1.07	1.04	0.99
CM015574.1_RaGOO	490000	45724411	0	0	0.0000	34	37	0.95	0.98	0.93
CM015574.1_RaGOO	491000	45724411	0	0	0.0000	34	34	0.95	0.91	1.01
CM015574.1_RaGOO	492000	45724411	0	0	0.0000	37	39	1.04	1.04	0.96
CM015574.1_RaGOO	493000	45724411	0	0	0.0000	29	36	0.82	0.96	0.82
CM015574.1_RaGOO	494000	45724411	0	0	0.0000	31	33	0.86	0.87	0.95
CM015574.1_RaGOO	495000	45724411	0	0	0.0000	39	39	1.09	1.03	1.01
CM015574.1_RaGOO	496000	45724411	0	0	0.0000	32	37	0.89	1.00	0.86
CM015574.1_RaGOO	497000	45724411	0	0	0.0000	37	36	1.04	0.95	1.05
CM015574.1_RaGOO	498000	45724411	0	0	0.0000	31	36	0.86	0.98	0.85
CM015574.1_RaGOO	499000	45724411	0	0	0.0000	30	34	0.83	0.91	0.88
CM015574.1_RaGOO	500000	45724411	0	0	0.0000	30	31	0.83	0.83	0.96
CM015574.1_RaGOO	501000	45724411	0	0	0.0000	29	34	0.80	0.91	0.85
CM015574.1_RaGOO	502000	45724411	0	0	0.0000	25	30	0.70	0.80	0.85
CM015574.1_RaGOO	503000	45724411	0	0	0.0000	29	31	0.79	0.84	0.91
CM015574.1_RaGOO	504000	45724411	0	0	0.0000	26	32	0.72	0.85	0.81
CM015574.1_RaGOO	505000	45724411	0	0	0.0000	28	34	0.79	0.90	0.84
CM015574.1_RaGOO	506000	45724411	0	0	0.0000	28	29	0.79	0.77	0.98
CM015574.1_RaGOO	507000	45724411	0	0	0.0000	25	30	0.71	0.80	0.84
CM015574.1_RaGOO	508000	45724411	0	0	0.0000	27	28	0.76	0.75	0.97
CM015574.1_RaGOO	509000	45724411	0	0	0.0000	28	37	0.78	0.99	0.76
CM015574.1_RaGOO	510000	45724411	0	0	0.0000	27	30	0.74	0.81	0.87
CM015574.1_RaGOO	511000	45724411	0	0	0.0000	28	32	0.78	0.86	0.87
CM015574.1_RaGOO	512000	45724411	0	0	0.0000	31	30	0.85	0.81	1.01
CM015574.1_RaGOO	513000	45724411	0	0	0.0000	36	35	0.99	0.93	1.03
CM015574.1_RaGOO	514000	45724411	0	0	0.0000	31	32	0.87	0.85	0.98
CM015574.1_RaGOO	515000	45724411	0	0	0.0000	27	36	0.75	0.96	0.75
CM015574.1_RaGOO	516000	45724411	0	0	0.0788	26	34	0.72	0.90	0.76
CM015574.1_RaGOO	517000	45724411	0	1	0.0423	30	33	0.83	0.89	0.89
CM015574.1_RaGOO	518000	45724411	0	0	0.0000	34	42	0.94	1.14	0.79
CM015574.1_RaGOO	519000	45724411	0	0	0.0000	33	34	0.93	0.92	0.97
CM015574.1_RaGOO	520000	45724411	0	0	0.0000	32	29	0.90	0.78	1.11
CM015574.1_RaGOO	521000	45724411	0	0	0.0000	28	31	0.77	0.83	0.89
CM015574.1_RaGOO	522000	45724411	0	0	0.0000	33	34	0.91	0.90	0.98
CM015574.1_RaGOO	523000	45724411	0	0	0.0000	28	33	0.79	0.89	0.85
CM015574.1_RaGOO	524000	45724411	0	0	0.0000	31	31	0.88	0.84	1.01
CM015574.1_RaGOO	525000	45724411	0	0	0.1138	37	34	1.02	0.91	1.07
CM015574.1_RaGOO	526000	45724411	0	0	0.0000	38	40	1.06	1.06	0.96
CM015574.1_RaGOO	527000	45724411	0	0	0.0000	31	30	0.87	0.81	1.03
CM015574.1_RaGOO	528000	45724411	0	0	0.0000	32	35	0.90	0.95	0.91
CM015574.1_RaGOO	529000	45724411	0	0	0.0000	31	37	0.88	0.98	0.86
CM015574.1_RaGOO	530000	45724411	0	0	0.0000	27	37	0.76	0.99	0.74
CM015574.1_RaGOO	531000	45724411	0	0	0.0000	32	31	0.90	0.83	1.04
CM015574.1_RaGOO	532000	45724411	0	0	0.0000	29	29	0.80	0.77	0.99
CM015574.1_RaGOO	533000	45724411	0	0	0.0000	32	36	0.90	0.97	0.89
CM015574.1_RaGOO	534000	45724411	0	0	0.0000	31	29	0.87	0.77	1.09
CM015574.1_RaGOO	535000	45724411	0	0	0.0000	36	29	1.00	0.77	1.24
CM015574.1_RaGOO	536000	45724411	0	0	0.0000	35	37	0.97	1.00	0.93
CM015574.1_RaGOO	537000	45724411	0	0	0.0000	28	35	0.78	0.93	0.81
CM015574.1_RaGOO	538000	45724411	0	0	0.0000	28	30	0.79	0.80	0.95
CM015574.1_RaGOO	539000	45724411	0	0	0.0000	35	39	0.97	1.05	0.89
CM015574.1_RaGOO	540000	45724411	0	0	0.0000	29	35	0.81	0.94	0.83
CM015574.1_RaGOO	541000	45724411	0	0	0.0000	36	31	1.00	0.83	1.17
CM015574.1_RaGOO	542000	45724411	0	0	0.0000	35	35	0.99	0.94	1.01
CM015574.1_RaGOO	543000	45724411	0	0	0.0000	33	34	0.93	0.91	0.98
CM015574.1_RaGOO	544000	45724411	0	0	0.0000	30	25	0.83	0.68	1.17
CM015574.1_RaGOO	545000	45724411	0	0	0.0000	28	30	0.78	0.79	0.95
CM015574.1_RaGOO	546000	45724411	0	0	0.0000	38	32	1.07	0.85	1.21
CM015574.1_RaGOO	547000	45724411	0	0	0.0000	32	33	0.90	0.87	0.99
CM015574.1_RaGOO	548000	45724411	0	0	0.0000	32	32	0.89	0.86	1.00
CM015574.1_RaGOO	549000	45724411	0	0	0.0000	30	32	0.85	0.85	0.96
CM015574.1_RaGOO	550000	45724411	0	0	0.0000	27	26	0.74	0.69	1.04
CM015574.1_RaGOO	551000	45724411	0	0	0.0000	31	30	0.86	0.81	1.02
CM015574.1_RaGOO	552000	45724411	0	0	0.0000	23	35	0.65	0.95	0.66
CM015574.1_RaGOO	553000	45724411	0	0	0.0000	25	29	0.70	0.78	0.87
CM015574.1_RaGOO	554000	45724411	0	0	0.0000	36	38	1.01	1.01	0.96
CM015574.1_RaGOO	555000	45724411	0	0	0.0000	20	28	0.55	0.74	0.72
CM015574.1_RaGOO	556000	45724411	0	0	0.0260	28	26	0.78	0.70	1.06
CM015574.1_RaGOO	557000	45724411	0	0	0.0000	33	30	0.91	0.79	1.11
CM015574.1_RaGOO	558000	45724411	0	0	0.0995	33	33	0.91	0.88	1.00
CM015574.1_RaGOO	559000	45724411	0	0	0.0000	32	29	0.88	0.78	1.09
CM015574.1_RaGOO	560000	45724411	0	0	0.0000	28	31	0.79	0.84	0.90
CM015574.1_RaGOO	561000	45724411	0	0	0.0000	32	34	0.90	0.92	0.94
CM015574.1_RaGOO	562000	45724411	0	0	0.0000	36	39	1.00	1.05	0.91
CM015574.1_RaGOO	563000	45724411	0	0	0.0000	34	32	0.94	0.86	1.04
CM015574.1_RaGOO	564000	45724411	0	0	0.0000	27	31	0.75	0.83	0.87
CM015574.1_RaGOO	565000	45724411	0	0	0.0337	32	29	0.89	0.78	1.09
CM015574.1_RaGOO	566000	45724411	0	0	0.0000	33	31	0.93	0.82	1.08
CM015574.1_RaGOO	567000	45724411	0	0	0.0019	30	34	0.84	0.92	0.88
CM015574.1_RaGOO	568000	45724411	0	0	0.0000	37	29	1.04	0.78	1.28
CM015574.1_RaGOO	569000	45724411	0	0	0.0000	36	37	1.01	1.00	0.98
CM015574.1_RaGOO	570000	45724411	0	0	0.0000	37	33	1.02	0.89	1.11
CM015574.1_RaGOO	571000	45724411	0	0	0.0057	32	29	0.90	0.78	1.11
CM015574.1_RaGOO	572000	45724411	0	0	0.0000	35	33	0.97	0.88	1.05
CM015574.1_RaGOO	573000	45724411	0	0	0.0000	34	34	0.96	0.90	1.02
CM015574.1_RaGOO	574000	45724411	0	0	0.0000	48	48	1.33	1.30	0.99
CM015574.1_RaGOO	575000	45724411	0	0	0.0000	99	106	2.77	2.84	0.94
CM015574.1_RaGOO	576000	45724411	0	0	0.0000	183	204	5.11	5.46	0.90
CM015574.1_RaGOO	577000	45724411	0	0	0.0000	52	55	1.44	1.47	0.94
CM015574.1_RaGOO	578000	45724411	0	0	0.0009	39	40	1.08	1.06	0.97
CM015574.1_RaGOO	579000	45724411	0	0	0.0000	35	37	0.97	0.98	0.95
CM015574.1_RaGOO	580000	45724411	0	0	0.0000	34	34	0.94	0.91	0.99
CM015574.1_RaGOO	581000	45724411	0	0	0.2513	43	36	1.18	0.96	1.19
CM015574.1_RaGOO	582000	45724411	0	0	0.0000	35	28	0.96	0.75	1.23
CM015574.1_RaGOO	583000	45724411	0	0	0.0000	33	35	0.91	0.94	0.94
CM015574.1_RaGOO	584000	45724411	0	0	0.0000	36	36	0.99	0.96	1.00
CM015574.1_RaGOO	585000	45724411	0	0	0.0000	35	33	0.97	0.88	1.06
CM015574.1_RaGOO	586000	45724411	0	0	0.0000	31	34	0.87	0.92	0.91
CM015574.1_RaGOO	587000	45724411	0	0	0.0000	37	39	1.02	1.04	0.94
CM015574.1_RaGOO	588000	45724411	0	0	0.0000	43	39	1.19	1.03	1.11
CM015574.1_RaGOO	589000	45724411	0	0	0.0000	36	38	1.01	1.01	0.96
CM015574.1_RaGOO	590000	45724411	0	0	0.0000	38	31	1.07	0.83	1.24
CM015574.1_RaGOO	591000	45724411	0	0	0.0000	36	36	1.00	0.96	1.00
CM015574.1_RaGOO	592000	45724411	0	0	0.0000	27	37	0.75	1.00	0.72
CM015574.1_RaGOO	593000	45724411	0	0	0.0000	31	31	0.85	0.83	0.98
CM015574.1_RaGOO	594000	45724411	0	0	0.0000	41	36	1.14	0.97	1.13
CM015574.1_RaGOO	595000	45724411	0	0	0.0000	32	34	0.89	0.91	0.94
CM015574.1_RaGOO	596000	45724411	0	0	0.0000	37	35	1.04	0.93	1.08
CM015574.1_RaGOO	597000	45724411	0	0	0.0000	37	30	1.02	0.79	1.24
CM015574.1_RaGOO	598000	45724411	0	0	0.0000	38	33	1.05	0.87	1.15
CM015574.1_RaGOO	599000	45724411	0	0	0.0000	32	35	0.88	0.94	0.90
CM015574.1_RaGOO	600000	45724411	0	0	0.0000	36	39	1.01	1.05	0.92
CM015574.1_RaGOO	601000	45724411	0	3	0.0000	33	33	0.92	0.88	1.00
CM015574.1_RaGOO	602000	45724411	0	0	0.1064	32	41	0.90	1.10	0.78
CM015574.1_RaGOO	603000	45724411	0	0	0.0000	34	39	0.94	1.05	0.86
CM015574.1_RaGOO	604000	45724411	0	0	0.0000	39	37	1.10	1.00	1.05
CM015574.1_RaGOO	605000	45724411	0	0	0.0028	38	36	1.05	0.96	1.05
CM015574.1_RaGOO	606000	45724411	0	0	0.0000	31	30	0.86	0.81	1.02
CM015574.1_RaGOO	607000	45724411	0	0	0.0000	30	32	0.83	0.85	0.94
CM015574.1_RaGOO	608000	45724411	0	0	0.1194	23	31	0.65	0.82	0.75
CM015574.1_RaGOO	609000	45724411	0	0	0.0000	33	30	0.91	0.81	1.08
CM015574.1_RaGOO	610000	45724411	0	0	0.0000	31	29	0.87	0.77	1.08
CM015574.1_RaGOO	611000	45724411	0	0	0.0000	28	31	0.77	0.82	0.90
CM015574.1_RaGOO	612000	45724411	0	0	0.0000	23	29	0.65	0.78	0.81
CM015574.1_RaGOO	613000	45724411	0	1	0.0000	22	28	0.60	0.75	0.78
CM015574.1_RaGOO	614000	45724411	0	0	0.0000	26	31	0.72	0.83	0.84
CM015574.1_RaGOO	615000	45724411	0	0	0.0000	23	29	0.64	0.77	0.81
CM015574.1_RaGOO	616000	45724411	0	0	0.0042	28	33	0.79	0.89	0.86
CM015574.1_RaGOO	617000	45724411	0	0	0.0000	29	35	0.80	0.92	0.83
CM015574.1_RaGOO	618000	45724411	0	0	0.0000	21	35	0.59	0.93	0.61
CM015574.1_RaGOO	619000	45724411	0	0	0.0000	35	36	0.97	0.96	0.98
CM015574.1_RaGOO	620000	45724411	0	0	0.0000	33	28	0.93	0.76	1.17
CM015574.1_RaGOO	621000	45724411	0	0	0.0000	32	31	0.90	0.83	1.04
CM015574.1_RaGOO	622000	45724411	0	0	0.0000	29	32	0.80	0.87	0.89
CM015574.1_RaGOO	623000	45724411	0	0	0.0422	28	30	0.77	0.79	0.93
CM015574.1_RaGOO	624000	45724411	0	0	0.0151	24	32	0.67	0.86	0.75
CM015574.1_RaGOO	625000	45724411	0	0	0.0102	27	34	0.75	0.90	0.80
CM015574.1_RaGOO	626000	45724411	0	0	0.0000	6	8	0.16	0.21	0.73
CM015574.1_RaGOO	627000	45724411	0	1	0.0000	24	22	0.66	0.59	1.06
CM015574.1_RaGOO	628000	45724411	0	0	0.0000	13	13	0.35	0.35	0.96
CM015574.1_RaGOO	629000	45724411	0	0	0.0000	28	32	0.77	0.86	0.87
CM015574.1_RaGOO	630000	45724411	0	0	0.0000	31	35	0.87	0.93	0.90
CM015574.1_RaGOO	631000	45724411	0	0	0.0000	31	32	0.86	0.87	0.95
CM015574.1_RaGOO	632000	45724411	0	0	0.0000	22	26	0.61	0.69	0.85
CM015574.1_RaGOO	633000	45724411	0	0	0.0000	29	25	0.80	0.67	1.14
CM015574.1_RaGOO	634000	45724411	0	0	0.0000	29	34	0.82	0.92	0.85
CM015574.1_RaGOO	635000	45724411	0	1	0.0000	29	32	0.81	0.84	0.92
CM015574.1_RaGOO	636000	45724411	0	0	0.0000	26	28	0.73	0.74	0.94
CM015574.1_RaGOO	637000	45724411	0	0	0.0000	33	30	0.91	0.81	1.07
CM015574.1_RaGOO	638000	45724411	0	0	0.0000	30	34	0.83	0.91	0.88
CM015574.1_RaGOO	639000	45724411	0	0	0.0000	31	29	0.86	0.79	1.05
CM015574.1_RaGOO	640000	45724411	0	0	0.0000	28	28	0.78	0.74	1.01
CM015574.1_RaGOO	641000	45724411	0	0	0.0000	30	25	0.83	0.67	1.19
CM015574.1_RaGOO	642000	45724411	0	0	0.0000	27	29	0.76	0.78	0.94
CM015574.1_RaGOO	643000	45724411	0	0	0.0000	27	33	0.74	0.89	0.80
CM015574.1_RaGOO	644000	45724411	0	0	0.0000	30	28	0.82	0.76	1.04
CM015574.1_RaGOO	645000	45724411	0	0	0.0000	33	30	0.91	0.79	1.10
CM015574.1_RaGOO	646000	45724411	0	0	0.0657	29	30	0.82	0.79	0.99
CM015574.1_RaGOO	647000	45724411	0	0	0.0000	34	34	0.95	0.90	1.01
CM015574.1_RaGOO	648000	45724411	0	0	0.0000	31	30	0.87	0.80	1.04
CM015574.1_RaGOO	649000	45724411	0	0	0.0000	33	38	0.92	1.03	0.85
CM015574.1_RaGOO	650000	45724411	0	0	0.0000	32	36	0.89	0.95	0.90
CM015574.1_RaGOO	651000	45724411	0	0	0.0000	36	31	1.00	0.82	1.17
CM015574.1_RaGOO	652000	45724411	0	0	0.0000	37	38	1.02	1.03	0.96
CM015574.1_RaGOO	653000	45724411	0	0	0.0000	34	38	0.95	1.01	0.90
CM015574.1_RaGOO	654000	45724411	0	0	0.0000	29	28	0.81	0.75	1.04
CM015574.1_RaGOO	655000	45724411	0	0	0.0000	36	32	1.00	0.87	1.10
CM015574.1_RaGOO	656000	45724411	0	0	0.0000	35	35	0.97	0.94	0.98
CM015574.1_RaGOO	657000	45724411	0	0	0.0000	38	41	1.05	1.11	0.91
CM015574.1_RaGOO	658000	45724411	0	0	0.0000	38	33	1.05	0.89	1.13
CM015574.1_RaGOO	659000	45724411	0	0	0.0147	42	41	1.16	1.11	1.01
CM015574.1_RaGOO	660000	45724411	0	0	0.0000	36	38	1.00	1.01	0.95
CM015574.1_RaGOO	661000	45724411	0	0	0.0000	29	33	0.81	0.87	0.89
CM015574.1_RaGOO	662000	45724411	0	0	0.0000	33	32	0.93	0.85	1.05
CM015574.1_RaGOO	663000	45724411	0	0	0.0000	34	38	0.95	1.01	0.90
CM015574.1_RaGOO	664000	45724411	0	0	0.0000	29	31	0.81	0.83	0.94
CM015574.1_RaGOO	665000	45724411	0	0	0.0052	32	27	0.89	0.72	1.19
CM015574.1_RaGOO	666000	45724411	0	0	0.0000	30	33	0.84	0.88	0.91
CM015574.1_RaGOO	667000	45724411	0	0	0.0000	25	34	0.69	0.92	0.73
CM015574.1_RaGOO	668000	45724411	0	0	0.0047	27	30	0.74	0.80	0.89
CM015574.1_RaGOO	669000	45724411	0	0	0.0000	28	23	0.79	0.62	1.22
CM015574.1_RaGOO	670000	45724411	0	0	0.0000	27	27	0.76	0.72	1.01
CM015574.1_RaGOO	671000	45724411	0	0	0.0000	25	29	0.69	0.77	0.86
CM015574.1_RaGOO	672000	45724411	0	0	0.0000	30	31	0.83	0.82	0.98
CM015574.1_RaGOO	673000	45724411	0	0	0.0000	28	32	0.77	0.86	0.86
CM015574.1_RaGOO	674000	45724411	0	0	0.0000	33	29	0.93	0.78	1.14
CM015574.1_RaGOO	675000	45724411	0	0	0.0000	39	31	1.10	0.83	1.27
CM015574.1_RaGOO	676000	45724411	0	0	0.0000	32	29	0.90	0.76	1.13
CM015574.1_RaGOO	677000	45724411	0	0	0.0000	30	25	0.84	0.67	1.21
CM015574.1_RaGOO	678000	45724411	0	0	0.0000	23	23	0.64	0.62	0.99
CM015574.1_RaGOO	679000	45724411	0	0	0.0000	26	23	0.73	0.62	1.14
CM015574.1_RaGOO	680000	45724411	0	0	0.0000	29	35	0.81	0.93	0.83
CM015574.1_RaGOO	681000	45724411	0	0	0.0000	24	31	0.67	0.83	0.78
CM015574.1_RaGOO	682000	45724411	0	1	0.0200	28	29	0.79	0.79	0.96
CM015574.1_RaGOO	683000	45724411	0	0	0.0000	28	27	0.79	0.73	1.04
CM015574.1_RaGOO	684000	45724411	0	0	0.0000	26	27	0.73	0.73	0.95
CM015574.1_RaGOO	685000	45724411	0	0	0.0000	26	24	0.72	0.64	1.09
CM015574.1_RaGOO	686000	45724411	0	0	0.0000	27	29	0.75	0.77	0.93
CM015574.1_RaGOO	687000	45724411	0	0	0.0000	23	32	0.64	0.84	0.73
CM015574.1_RaGOO	688000	45724411	0	0	0.0000	29	33	0.82	0.89	0.89
CM015574.1_RaGOO	689000	45724411	0	0	0.0000	30	35	0.84	0.94	0.86
CM015574.1_RaGOO	690000	45724411	0	0	0.0000	27	26	0.75	0.70	1.03
CM015574.1_RaGOO	691000	45724411	0	0	0.0000	28	27	0.79	0.71	1.07
CM015574.1_RaGOO	692000	45724411	0	0	0.0000	35	27	0.97	0.73	1.28
CM015574.1_RaGOO	693000	45724411	0	0	0.0000	33	34	0.93	0.90	0.99
CM015574.1_RaGOO	694000	45724411	0	0	0.0000	26	34	0.72	0.91	0.76
CM015574.1_RaGOO	695000	45724411	0	0	0.0230	36	36	1.00	0.95	1.00
CM015574.1_RaGOO	696000	45724411	0	0	0.0000	33	33	0.92	0.89	0.99
CM015574.1_RaGOO	697000	45724411	0	0	0.0000	29	36	0.82	0.98	0.81
CM015574.1_RaGOO	698000	45724411	0	0	0.0000	32	29	0.89	0.77	1.11
CM015574.1_RaGOO	699000	45724411	0	0	0.0000	27	35	0.75	0.93	0.77
CM015574.1_RaGOO	700000	45724411	0	0	0.0000	28	28	0.79	0.76	1.00
CM015574.1_RaGOO	701000	45724411	0	0	0.0000	31	28	0.85	0.76	1.07
CM015574.1_RaGOO	702000	45724411	0	0	0.0000	30	28	0.85	0.75	1.09
CM015574.1_RaGOO	703000	45724411	0	0	0.0000	30	30	0.84	0.80	1.01
CM015574.1_RaGOO	704000	45724411	0	0	0.0000	30	30	0.83	0.81	0.98
CM015574.1_RaGOO	705000	45724411	0	0	0.0000	27	28	0.74	0.76	0.95
CM015574.1_RaGOO	706000	45724411	0	0	0.0000	29	38	0.81	1.02	0.76
CM015574.1_RaGOO	707000	45724411	0	0	0.0000	23	27	0.65	0.71	0.88
CM015574.1_RaGOO	708000	45724411	0	0	0.0000	25	33	0.70	0.88	0.76
CM015574.1_RaGOO	709000	45724411	0	0	0.0000	27	35	0.77	0.92	0.80
CM015574.1_RaGOO	710000	45724411	0	0	0.0000	32	36	0.89	0.96	0.89
CM015574.1_RaGOO	711000	45724411	0	0	0.0000	32	32	0.90	0.87	0.99
CM015574.1_RaGOO	712000	45724411	0	0	0.0000	32	35	0.89	0.93	0.93
CM015574.1_RaGOO	713000	45724411	0	0	0.0000	32	28	0.90	0.75	1.15
CM015574.1_RaGOO	714000	45724411	0	0	0.0000	28	32	0.77	0.85	0.87
CM015574.1_RaGOO	715000	45724411	0	0	0.0000	19	22	0.53	0.58	0.88
CM015574.1_RaGOO	716000	45724411	0	0	0.0000	21	25	0.60	0.66	0.87
CM015574.1_RaGOO	717000	45724411	1	0	0.0000	22	24	0.62	0.64	0.94
CM015574.1_RaGOO	718000	45724411	0	0	0.0000	20	26	0.57	0.71	0.78
CM015574.1_RaGOO	719000	45724411	0	0	0.0000	25	29	0.71	0.77	0.89
CM015574.1_RaGOO	720000	45724411	0	0	0.0000	24	28	0.66	0.76	0.83
CM015574.1_RaGOO	721000	45724411	0	0	0.0000	23	28	0.64	0.75	0.82
CM015574.1_RaGOO	722000	45724411	0	0	0.0169	25	25	0.69	0.66	1.00
CM015574.1_RaGOO	723000	45724411	0	0	0.0000	25	28	0.69	0.76	0.87
CM015574.1_RaGOO	724000	45724411	0	0	0.0000	29	35	0.81	0.93	0.84
CM015574.1_RaGOO	725000	45724411	0	0	0.0000	28	31	0.77	0.83	0.89
CM015574.1_RaGOO	726000	45724411	0	0	0.0000	24	29	0.68	0.78	0.83
CM015574.1_RaGOO	727000	45724411	0	0	0.0000	29	27	0.80	0.71	1.07
CM015574.1_RaGOO	728000	45724411	0	0	0.1445	30	30	0.83	0.80	1.00
CM015574.1_RaGOO	729000	45724411	0	0	0.0000	24	26	0.66	0.71	0.89
CM015574.1_RaGOO	730000	45724411	0	0	0.0000	28	28	0.79	0.76	0.99
CM015574.1_RaGOO	731000	45724411	0	0	0.0000	29	30	0.80	0.81	0.95
CM015574.1_RaGOO	732000	45724411	0	0	0.0000	25	30	0.70	0.80	0.84
CM015574.1_RaGOO	733000	45724411	0	0	0.0000	29	31	0.80	0.83	0.92
CM015574.1_RaGOO	734000	45724411	0	0	0.0000	25	30	0.69	0.80	0.83
CM015574.1_RaGOO	735000	45724411	0	0	0.0000	30	28	0.83	0.74	1.07
CM015574.1_RaGOO	736000	45724411	0	0	0.0000	27	25	0.76	0.68	1.07
CM015574.1_RaGOO	737000	45724411	0	0	0.0000	30	27	0.82	0.73	1.09
CM015574.1_RaGOO	738000	45724411	0	0	0.0000	31	31	0.88	0.82	1.02
CM015574.1_RaGOO	739000	45724411	0	0	0.0000	36	33	1.00	0.89	1.08
CM015574.1_RaGOO	740000	45724411	0	0	0.0000	28	28	0.79	0.76	1.00
CM015574.1_RaGOO	741000	45724411	0	0	0.0000	29	32	0.81	0.85	0.92
CM015574.1_RaGOO	742000	45724411	0	0	0.0000	32	38	0.88	1.02	0.83
CM015574.1_RaGOO	743000	45724411	0	0	0.0000	33	38	0.91	1.01	0.87
CM015574.1_RaGOO	744000	45724411	0	0	0.0000	37	35	1.02	0.93	1.06
CM015574.1_RaGOO	745000	45724411	0	0	0.0000	40	39	1.11	1.04	1.03
CM015574.1_RaGOO	746000	45724411	0	0	0.0000	49	52	1.36	1.40	0.94
CM015574.1_RaGOO	747000	45724411	0	0	0.0000	39	46	1.07	1.24	0.83
CM015574.1_RaGOO	748000	45724411	0	0	0.0000	41	40	1.13	1.08	1.01
CM015574.1_RaGOO	749000	45724411	0	0	0.0000	29	35	0.79	0.93	0.82
CM015574.1_RaGOO	750000	45724411	0	0	0.0000	29	35	0.81	0.94	0.83
CM015574.1_RaGOO	751000	45724411	0	0	0.0000	34	44	0.96	1.17	0.78
CM015574.1_RaGOO	752000	45724411	0	0	0.0000	42	42	1.16	1.13	0.99
CM015574.1_RaGOO	753000	45724411	0	0	0.0000	31	31	0.87	0.84	0.99
CM015574.1_RaGOO	754000	45724411	0	0	0.0000	36	41	0.99	1.09	0.87
CM015574.1_RaGOO	755000	45724411	0	0	0.0000	32	42	0.90	1.12	0.78
CM015574.1_RaGOO	756000	45724411	0	0	0.0000	42	42	1.18	1.13	1.00
CM015574.1_RaGOO	757000	45724411	0	0	0.0000	35	43	0.98	1.15	0.82
CM015574.1_RaGOO	758000	45724411	0	0	0.0000	34	38	0.96	1.02	0.90
CM015574.1_RaGOO	759000	45724411	0	0	0.0000	36	39	1.00	1.04	0.92
CM015574.1_RaGOO	760000	45724411	0	0	0.0000	38	37	1.07	1.00	1.03
CM015574.1_RaGOO	761000	45724411	0	0	0.0000	41	38	1.14	1.01	1.09
CM015574.1_RaGOO	762000	45724411	0	0	0.0000	38	38	1.07	1.01	1.01
CM015574.1_RaGOO	763000	45724411	0	0	0.0000	35	39	0.96	1.04	0.89
CM015574.1_RaGOO	764000	45724411	0	0	0.0000	33	38	0.92	1.03	0.86
CM015574.1_RaGOO	765000	45724411	0	0	0.0611	37	29	1.03	0.78	1.27
CM015574.1_RaGOO	766000	45724411	0	0	0.0522	43	37	1.20	0.98	1.18
CM015574.1_RaGOO	767000	45724411	0	0	0.0000	39	39	1.09	1.04	1.01
CM015574.1_RaGOO	768000	45724411	0	0	0.0000	35	32	0.96	0.87	1.07
CM015574.1_RaGOO	769000	45724411	0	0	0.0000	32	41	0.90	1.10	0.79
CM015574.1_RaGOO	770000	45724411	0	0	0.0000	36	36	1.01	0.96	1.01
CM015574.1_RaGOO	771000	45724411	0	0	0.0000	38	44	1.06	1.18	0.86
CM015574.1_RaGOO	772000	45724411	0	0	0.0000	39	42	1.09	1.13	0.92
CM015574.1_RaGOO	773000	45724411	0	0	0.0368	35	42	0.98	1.13	0.83
CM015574.1_RaGOO	774000	45724411	0	0	0.0000	41	41	1.13	1.09	0.99
CM015574.1_RaGOO	775000	45724411	0	0	0.0000	36	44	1.00	1.18	0.82
CM015574.1_RaGOO	776000	45724411	0	0	0.0008	39	42	1.09	1.12	0.94
CM015574.1_RaGOO	777000	45724411	0	0	0.0000	40	43	1.10	1.16	0.92
CM015574.1_RaGOO	778000	45724411	0	0	0.0000	35	35	0.98	0.93	1.01
CM015574.1_RaGOO	779000	45724411	0	0	0.0000	34	45	0.94	1.20	0.76
CM015574.1_RaGOO	780000	45724411	0	0	0.0000	36	43	0.99	1.14	0.84
CM015574.1_RaGOO	781000	45724411	0	0	0.0000	35	38	0.99	1.02	0.93
CM015574.1_RaGOO	782000	45724411	0	0	0.0072	27	39	0.75	1.04	0.70
CM015574.1_RaGOO	783000	45724411	1	0	0.0381	30	36	0.82	0.96	0.83
CM015574.1_RaGOO	784000	45724411	0	0	0.0115	33	35	0.91	0.94	0.93
CM015574.1_RaGOO	785000	45724411	0	0	0.0329	33	36	0.93	0.96	0.93
CM015574.1_RaGOO	786000	45724411	0	0	0.0000	35	36	0.99	0.96	0.99
CM015574.1_RaGOO	787000	45724411	1	0	0.0000	31	30	0.87	0.81	1.04
CM015574.1_RaGOO	788000	45724411	0	0	0.0000	34	30	0.95	0.81	1.13
CM015574.1_RaGOO	789000	45724411	0	0	0.0014	35	35	0.97	0.93	1.00
CM015574.1_RaGOO	790000	45724411	1	0	0.0000	28	28	0.78	0.75	0.99
CM015574.1_RaGOO	791000	45724411	0	0	0.0452	34	40	0.96	1.08	0.85
CM015574.1_RaGOO	792000	45724411	1	0	0.1638	41	39	1.15	1.05	1.05
CM015574.1_RaGOO	793000	45724411	0	0	0.0616	45	43	1.25	1.15	1.05
CM015574.1_RaGOO	794000	45724411	0	0	0.0000	43	47	1.20	1.26	0.92
CM015574.1_RaGOO	795000	45724411	0	0	0.0000	44	48	1.24	1.28	0.93
CM015574.1_RaGOO	796000	45724411	0	0	0.0000	42	44	1.16	1.19	0.94
CM015574.1_RaGOO	797000	45724411	0	0	0.0000	35	34	0.98	0.91	1.03
CM015574.1_RaGOO	798000	45724411	0	0	0.0000	39	37	1.08	1.00	1.05
CM015574.1_RaGOO	799000	45724411	0	0	0.0000	36	49	1.01	1.31	0.75
CM015574.1_RaGOO	800000	45724411	0	0	0.0000	40	38	1.10	1.03	1.03
CM015574.1_RaGOO	801000	45724411	0	0	0.0000	37	33	1.03	0.89	1.11
CM015574.1_RaGOO	802000	45724411	0	0	0.0000	37	36	1.02	0.95	1.03
CM015574.1_RaGOO	803000	45724411	0	0	0.0287	36	38	0.99	1.01	0.94
CM015574.1_RaGOO	804000	45724411	0	0	0.0000	37	36	1.02	0.95	1.03
CM015574.1_RaGOO	805000	45724411	0	0	0.0000	42	32	1.16	0.85	1.31
CM015574.1_RaGOO	806000	45724411	0	0	0.0000	42	38	1.17	1.02	1.11
CM015574.1_RaGOO	807000	45724411	0	0	0.0000	40	38	1.11	1.02	1.05
CM015574.1_RaGOO	808000	45724411	0	0	0.0990	32	32	0.88	0.85	0.99
CM015574.1_RaGOO	809000	45724411	0	0	0.0009	32	32	0.88	0.85	0.99
CM015574.1_RaGOO	810000	45724411	0	0	0.0147	34	33	0.94	0.89	1.01
CM015574.1_RaGOO	811000	45724411	0	0	0.0000	38	39	1.05	1.05	0.97
CM015574.1_RaGOO	812000	45724411	0	0	0.0019	125	138	3.49	3.68	0.91
CM015574.1_RaGOO	813000	45724411	0	0	0.0000	97	90	2.71	2.40	1.08
CM015574.1_RaGOO	814000	45724411	0	0	0.0000	37	37	1.02	0.99	0.99
CM015574.1_RaGOO	815000	45724411	0	0	0.0055	34	41	0.95	1.11	0.82
CM015574.1_RaGOO	816000	45724411	0	0	0.0000	37	45	1.04	1.19	0.84
CM015574.1_RaGOO	817000	45724411	0	0	0.0000	37	44	1.02	1.17	0.84
CM015574.1_RaGOO	818000	45724411	0	0	0.0000	40	43	1.11	1.16	0.92
CM015574.1_RaGOO	819000	45724411	0	0	0.0000	41	44	1.13	1.19	0.92
CM015574.1_RaGOO	820000	45724411	0	0	0.0000	38	34	1.07	0.90	1.14
CM015574.1_RaGOO	821000	45724411	0	0	0.0000	39	34	1.10	0.90	1.17
CM015574.1_RaGOO	822000	45724411	0	0	0.0000	40	39	1.10	1.03	1.02
CM015574.1_RaGOO	823000	45724411	0	0	0.0000	35	41	0.98	1.10	0.86
CM015574.1_RaGOO	824000	45724411	0	0	0.0000	28	34	0.78	0.91	0.83
CM015574.1_RaGOO	825000	45724411	0	0	0.0000	34	35	0.95	0.93	0.98
CM015574.1_RaGOO	826000	45724411	0	0	0.0000	39	37	1.10	0.99	1.06
CM015574.1_RaGOO	827000	45724411	0	0	0.0000	35	33	0.96	0.89	1.04
CM015574.1_RaGOO	828000	45724411	0	0	0.0000	35	43	0.97	1.16	0.80
CM015574.1_RaGOO	829000	45724411	0	0	0.0000	39	41	1.07	1.09	0.95
CM015574.1_RaGOO	830000	45724411	0	0	0.0000	38	42	1.06	1.14	0.90
CM015574.1_RaGOO	831000	45724411	0	0	0.0000	39	41	1.08	1.10	0.95
CM015574.1_RaGOO	832000	45724411	0	0	0.0000	41	43	1.15	1.16	0.95
CM015574.1_RaGOO	833000	45724411	0	0	0.0000	40	45	1.10	1.20	0.88
CM015574.1_RaGOO	834000	45724411	0	0	0.0000	36	37	1.01	0.99	0.98
CM015574.1_RaGOO	835000	45724411	0	0	0.0008	42	39	1.18	1.06	1.07
CM015574.1_RaGOO	836000	45724411	2	0	0.0000	17	16	0.47	0.44	1.03
CM015574.1_RaGOO	837000	45724411	0	0	0.0000	34	42	0.94	1.12	0.80
CM015574.1_RaGOO	838000	45724411	0	0	0.0000	30	36	0.83	0.97	0.82
CM015574.1_RaGOO	839000	45724411	0	0	0.0000	21	26	0.59	0.69	0.82
CM015574.1_RaGOO	840000	45724411	0	0	0.0000	33	34	0.92	0.92	0.96
CM015574.1_RaGOO	841000	45724411	0	0	0.0043	24	31	0.68	0.82	0.79
CM015574.1_RaGOO	842000	45724411	0	0	0.0286	31	24	0.86	0.65	1.29
CM015574.1_RaGOO	843000	45724411	0	0	0.0000	24	28	0.66	0.74	0.87
CM015574.1_RaGOO	844000	45724411	0	0	0.0000	23	34	0.64	0.90	0.68
CM015574.1_RaGOO	845000	45724411	0	0	0.0000	27	29	0.75	0.79	0.92
CM015574.1_RaGOO	846000	45724411	0	0	0.0000	30	33	0.84	0.89	0.90
CM015574.1_RaGOO	847000	45724411	0	0	0.0000	35	34	0.98	0.90	1.05
CM015574.1_RaGOO	848000	45724411	0	0	0.0063	41	39	1.13	1.05	1.04
CM015574.1_RaGOO	849000	45724411	0	0	0.0000	41	41	1.14	1.10	0.99
CM015574.1_RaGOO	850000	45724411	0	0	0.0000	29	31	0.81	0.83	0.94
CM015574.1_RaGOO	851000	45724411	0	0	0.0000	30	30	0.84	0.81	0.99
CM015574.1_RaGOO	852000	45724411	0	0	0.0000	32	34	0.88	0.92	0.92
CM015574.1_RaGOO	853000	45724411	0	0	0.0533	35	38	0.98	1.00	0.94
CM015574.1_RaGOO	854000	45724411	0	0	0.0000	29	35	0.81	0.93	0.84
CM015574.1_RaGOO	855000	45724411	0	0	0.0000	34	47	0.94	1.25	0.73
CM015574.1_RaGOO	856000	45724411	0	0	0.0000	39	38	1.09	1.02	1.03
CM015574.1_RaGOO	857000	45724411	0	0	0.0000	35	35	0.96	0.93	0.99
CM015574.1_RaGOO	858000	45724411	0	0	0.0000	31	29	0.85	0.79	1.04
CM015574.1_RaGOO	859000	45724411	0	0	0.0000	30	33	0.85	0.87	0.93
CM015574.1_RaGOO	860000	45724411	0	0	0.0000	31	35	0.87	0.95	0.88
CM015574.1_RaGOO	861000	45724411	0	0	0.0000	35	39	0.97	1.04	0.90
CM015574.1_RaGOO	862000	45724411	0	0	0.0000	32	32	0.89	0.85	1.01
CM015574.1_RaGOO	863000	45724411	0	0	0.0000	30	28	0.84	0.75	1.08
CM015574.1_RaGOO	864000	45724411	0	0	0.0000	29	34	0.81	0.91	0.86
CM015574.1_RaGOO	865000	45724411	0	0	0.0000	29	37	0.81	0.99	0.79
CM015574.1_RaGOO	866000	45724411	0	0	0.0000	33	36	0.92	0.95	0.93
CM015574.1_RaGOO	867000	45724411	0	0	0.0000	34	35	0.96	0.94	0.98
CM015574.1_RaGOO	868000	45724411	0	0	0.0000	34	33	0.94	0.88	1.03
CM015574.1_RaGOO	869000	45724411	0	0	0.0000	18	17	0.49	0.46	1.02
CM015574.1_RaGOO	870000	45724411	0	0	0.0000	24	31	0.67	0.82	0.78
CM015574.1_RaGOO	871000	45724411	0	0	0.0001	35	30	0.98	0.79	1.19
CM015574.1_RaGOO	872000	45724411	0	0	0.0000	31	31	0.85	0.83	0.99
CM015574.1_RaGOO	873000	45724411	0	0	0.0000	29	34	0.80	0.90	0.85
CM015574.1_RaGOO	874000	45724411	1	0	0.0124	31	36	0.87	0.97	0.85
CM015574.1_RaGOO	875000	45724411	0	0	0.0186	31	35	0.86	0.95	0.87
CM015574.1_RaGOO	876000	45724411	0	0	0.0000	30	27	0.84	0.73	1.10
CM015574.1_RaGOO	877000	45724411	0	0	0.0000	38	39	1.06	1.04	0.98
CM015574.1_RaGOO	878000	45724411	0	0	0.0000	31	35	0.88	0.93	0.90
CM015574.1_RaGOO	879000	45724411	0	0	0.0727	34	33	0.95	0.88	1.04
CM015574.1_RaGOO	880000	45724411	0	0	0.0000	32	32	0.90	0.86	1.01
CM015574.1_RaGOO	881000	45724411	0	0	0.0000	39	37	1.08	0.99	1.04
CM015574.1_RaGOO	882000	45724411	0	0	0.0000	34	35	0.94	0.93	0.97
CM015574.1_RaGOO	883000	45724411	0	1	0.0804	40	35	1.10	0.94	1.13
CM015574.1_RaGOO	884000	45724411	0	0	0.0000	41	41	1.14	1.10	1.00
CM015574.1_RaGOO	885000	45724411	0	0	0.0000	34	33	0.95	0.89	1.03
CM015574.1_RaGOO	886000	45724411	0	0	0.0000	40	45	1.12	1.20	0.89
CM015574.1_RaGOO	887000	45724411	0	2	0.0055	33	31	0.91	0.83	1.06
CM015574.1_RaGOO	888000	45724411	0	0	0.0000	32	38	0.90	1.02	0.84
CM015574.1_RaGOO	889000	45724411	0	0	0.0187	32	37	0.89	0.98	0.88
CM015574.1_RaGOO	890000	45724411	0	0	0.0000	32	43	0.89	1.16	0.74
CM015574.1_RaGOO	891000	45724411	0	0	0.0000	36	35	1.00	0.95	1.02
CM015574.1_RaGOO	892000	45724411	0	0	0.0000	30	30	0.85	0.81	1.00
CM015574.1_RaGOO	893000	45724411	0	0	0.0000	29	30	0.81	0.80	0.97
CM015574.1_RaGOO	894000	45724411	0	0	0.0000	42	41	1.16	1.11	1.00
CM015574.1_RaGOO	895000	45724411	0	0	0.0000	33	40	0.91	1.08	0.81
CM015574.1_RaGOO	896000	45724411	0	0	0.0000	36	44	1.01	1.17	0.83
CM015574.1_RaGOO	897000	45724411	0	0	0.0000	36	34	1.00	0.92	1.04
CM015574.1_RaGOO	898000	45724411	0	0	0.0000	37	37	1.02	1.00	0.98
CM015574.1_RaGOO	899000	45724411	0	0	0.0000	36	37	1.02	0.99	0.99
CM015574.1_RaGOO	900000	45724411	0	0	0.0000	37	46	1.02	1.24	0.79
CM015574.1_RaGOO	901000	45724411	0	0	0.0000	42	39	1.17	1.05	1.07
CM015574.1_RaGOO	902000	45724411	0	0	0.0000	37	33	1.04	0.88	1.13
CM015574.1_RaGOO	903000	45724411	0	0	0.0000	38	42	1.06	1.12	0.91
CM015574.1_RaGOO	904000	45724411	0	0	0.0000	34	36	0.96	0.96	0.96
CM015574.1_RaGOO	905000	45724411	0	0	0.0000	42	33	1.18	0.88	1.29
CM015574.1_RaGOO	906000	45724411	0	0	0.0000	46	43	1.28	1.14	1.08
CM015574.1_RaGOO	907000	45724411	0	0	0.0000	38	42	1.07	1.13	0.91
CM015574.1_RaGOO	908000	45724411	0	0	0.0000	33	35	0.91	0.94	0.93
CM015574.1_RaGOO	909000	45724411	0	0	0.0000	30	38	0.84	1.03	0.79
CM015574.1_RaGOO	910000	45724411	0	0	0.0000	27	31	0.75	0.82	0.88
CM015574.1_RaGOO	911000	45724411	0	0	0.0000	30	35	0.82	0.95	0.83
CM015574.1_RaGOO	912000	45724411	0	0	0.0000	32	30	0.89	0.79	1.09
CM015574.1_RaGOO	913000	45724411	0	0	0.0000	33	31	0.93	0.84	1.06
CM015574.1_RaGOO	914000	45724411	0	1	0.0000	27	33	0.74	0.88	0.81
CM015574.1_RaGOO	915000	45724411	1	0	0.0041	22	27	0.61	0.72	0.82
CM015574.1_RaGOO	916000	45724411	0	0	0.0000	34	37	0.94	0.98	0.92
CM015574.1_RaGOO	917000	45724411	0	0	0.0010	27	37	0.76	0.99	0.73
CM015574.1_RaGOO	918000	45724411	0	0	0.0000	30	39	0.83	1.05	0.76
CM015574.1_RaGOO	919000	45724411	0	0	0.0000	29	35	0.81	0.93	0.84
CM015574.1_RaGOO	920000	45724411	0	0	0.0000	34	31	0.94	0.82	1.10
CM015574.1_RaGOO	921000	45724411	0	0	0.0000	37	32	1.03	0.85	1.17
CM015574.1_RaGOO	922000	45724411	0	0	0.0000	29	27	0.81	0.71	1.10
CM015574.1_RaGOO	923000	45724411	0	0	0.0000	31	35	0.86	0.93	0.89
CM015574.1_RaGOO	924000	45724411	0	0	0.0000	25	32	0.71	0.86	0.79
CM015574.1_RaGOO	925000	45724411	0	0	0.0044	38	39	1.07	1.06	0.97
CM015574.1_RaGOO	926000	45724411	0	2	0.0000	44	42	1.21	1.12	1.04
CM015574.1_RaGOO	927000	45724411	0	0	0.0000	46	47	1.27	1.26	0.97
CM015574.1_RaGOO	928000	45724411	0	0	0.0000	39	37	1.07	1.00	1.03
CM015574.1_RaGOO	929000	45724411	0	0	0.0000	34	39	0.95	1.04	0.88
CM015574.1_RaGOO	930000	45724411	0	0	0.0253	31	39	0.87	1.04	0.80
CM015574.1_RaGOO	931000	45724411	0	0	0.0429	34	35	0.94	0.93	0.97
CM015574.1_RaGOO	932000	45724411	0	0	0.0061	35	37	0.98	0.99	0.95
CM015574.1_RaGOO	933000	45724411	0	0	0.0001	37	41	1.03	1.09	0.91
CM015574.1_RaGOO	934000	45724411	0	0	0.1693	38	35	1.06	0.94	1.08
CM015574.1_RaGOO	935000	45724411	0	0	0.0627	34	34	0.95	0.92	0.99
CM015574.1_RaGOO	936000	45724411	0	4	0.1062	30	34	0.83	0.91	0.88
CM015574.1_RaGOO	937000	45724411	0	0	0.0089	38	34	1.05	0.92	1.10
CM015574.1_RaGOO	938000	45724411	0	0	0.0000	28	26	0.77	0.68	1.08
CM015574.1_RaGOO	939000	45724411	0	0	0.0856	33	37	0.91	0.98	0.89
CM015574.1_RaGOO	940000	45724411	0	0	0.0000	38	44	1.05	1.17	0.86
CM015574.1_RaGOO	941000	45724411	2	0	0.0808	30	29	0.83	0.78	1.03
CM015574.1_RaGOO	942000	45724411	0	0	0.1311	35	37	0.97	0.99	0.94
CM015574.1_RaGOO	943000	45724411	0	0	0.1804	26	37	0.74	0.98	0.72
CM015574.1_RaGOO	944000	45724411	0	0	0.0221	31	33	0.86	0.87	0.95
CM015574.1_RaGOO	945000	45724411	0	0	0.0000	28	29	0.78	0.76	0.98
CM015574.1_RaGOO	946000	45724411	0	0	0.0000	35	30	0.96	0.79	1.16
CM015574.1_RaGOO	947000	45724411	0	0	0.0000	31	34	0.86	0.91	0.91
CM015574.1_RaGOO	948000	45724411	0	0	0.0000	30	38	0.84	1.01	0.79
CM015574.1_RaGOO	949000	45724411	0	0	0.0414	32	37	0.89	0.98	0.87
CM015574.1_RaGOO	950000	45724411	0	0	0.0054	37	35	1.04	0.92	1.08
CM015574.1_RaGOO	951000	45724411	0	0	0.0000	29	30	0.80	0.80	0.96
CM015574.1_RaGOO	952000	45724411	0	0	0.0000	34	27	0.95	0.73	1.26
CM015574.1_RaGOO	953000	45724411	0	0	0.0000	30	33	0.84	0.89	0.91
CM015574.1_RaGOO	954000	45724411	0	0	0.0000	34	35	0.94	0.95	0.95
CM015574.1_RaGOO	955000	45724411	0	0	0.0000	30	28	0.83	0.75	1.07
CM015574.1_RaGOO	956000	45724411	0	0	0.0000	30	30	0.83	0.82	0.97
CM015574.1_RaGOO	957000	45724411	0	0	0.0000	28	35	0.77	0.95	0.78
CM015574.1_RaGOO	958000	45724411	0	0	0.0000	27	29	0.76	0.78	0.94
CM015574.1_RaGOO	959000	45724411	0	0	0.0000	33	27	0.91	0.73	1.20
CM015574.1_RaGOO	960000	45724411	0	0	0.0000	32	33	0.90	0.89	0.98
CM015574.1_RaGOO	961000	45724411	0	0	0.0000	32	38	0.89	1.03	0.83
CM015574.1_RaGOO	962000	45724411	0	0	0.0150	34	33	0.95	0.88	1.03
CM015574.1_RaGOO	963000	45724411	0	0	0.0000	29	32	0.82	0.86	0.92
CM015574.1_RaGOO	964000	45724411	0	0	0.0000	30	34	0.84	0.90	0.90
CM015574.1_RaGOO	965000	45724411	2	2	0.0000	35	33	0.98	0.88	1.08
CM015574.1_RaGOO	966000	45724411	0	0	0.0000	33	29	0.91	0.78	1.12
CM015574.1_RaGOO	967000	45724411	0	0	0.0000	28	36	0.77	0.96	0.77
CM015574.1_RaGOO	968000	45724411	3	0	0.0000	27	30	0.75	0.81	0.90
CM015574.1_RaGOO	969000	45724411	1	0	0.0209	31	29	0.85	0.78	1.05
CM015574.1_RaGOO	970000	45724411	0	0	0.0000	31	35	0.86	0.93	0.89
CM015574.1_RaGOO	971000	45724411	1	0	0.0140	32	31	0.90	0.82	1.06
CM015574.1_RaGOO	972000	45724411	0	0	0.0083	27	28	0.75	0.75	0.96
CM015574.1_RaGOO	973000	45724411	0	0	0.0000	30	34	0.82	0.90	0.88
CM015574.1_RaGOO	974000	45724411	0	0	0.1691	36	30	1.00	0.81	1.19
CM015574.1_RaGOO	975000	45724411	0	0	0.0549	31	36	0.87	0.97	0.86
CM015574.1_RaGOO	976000	45724411	0	0	0.0284	32	33	0.88	0.90	0.95
CM015574.1_RaGOO	977000	45724411	1	0	0.0000	38	32	1.05	0.86	1.17
CM015574.1_RaGOO	978000	45724411	0	0	0.0034	33	34	0.91	0.92	0.95
CM015574.1_RaGOO	979000	45724411	0	0	0.0250	47	40	1.30	1.08	1.16
CM015574.1_RaGOO	980000	45724411	0	0	0.0834	49	41	1.36	1.11	1.18
CM015574.1_RaGOO	981000	45724411	0	0	0.0000	37	37	1.04	0.98	1.02
CM015574.1_RaGOO	982000	45724411	0	0	0.0095	37	40	1.04	1.07	0.93
CM015574.1_RaGOO	983000	45724411	0	0	0.0096	33	39	0.93	1.05	0.85
CM015574.1_RaGOO	984000	45724411	0	4	0.0595	32	37	0.88	0.99	0.86
CM015574.1_RaGOO	985000	45724411	0	0	0.0000	45	44	1.25	1.18	1.01
CM015574.1_RaGOO	986000	45724411	0	0	0.0232	43	44	1.20	1.17	0.99
CM015574.1_RaGOO	987000	45724411	0	0	0.0000	34	37	0.95	1.00	0.91
CM015574.1_RaGOO	988000	45724411	0	2	0.0000	31	40	0.85	1.06	0.77
CM015574.1_RaGOO	989000	45724411	0	0	0.0000	38	33	1.05	0.88	1.14
CM015574.1_RaGOO	990000	45724411	0	0	0.1555	35	37	0.98	0.99	0.95
CM015574.1_RaGOO	991000	45724411	0	0	0.0000	41	38	1.15	1.02	1.08
CM015574.1_RaGOO	992000	45724411	0	0	0.1112	38	37	1.06	0.98	1.04
CM015574.1_RaGOO	993000	45724411	0	0	0.0000	29	30	0.82	0.79	0.99
CM015574.1_RaGOO	994000	45724411	2	0	0.0000	33	33	0.92	0.90	0.99
CM015574.1_RaGOO	995000	45724411	0	0	0.0333	33	35	0.92	0.95	0.93
CM015574.1_RaGOO	996000	45724411	0	0	0.0957	33	32	0.92	0.87	1.02
CM015574.1_RaGOO	997000	45724411	0	0	0.0000	34	32	0.95	0.86	1.06
CM015574.1_RaGOO	998000	45724411	0	0	0.0000	36	39	0.99	1.05	0.91
CM015574.1_RaGOO	999000	45724411	0	0	0.0000	33	35	0.92	0.94	0.94
CM015574.1_RaGOO	1000000	45724411	0	0	0.0976	34	36	0.95	0.96	0.95
CM015574.1_RaGOO	1001000	45724411	0	0	0.0056	35	39	0.96	1.04	0.89
CM015574.1_RaGOO	1002000	45724411	0	0	0.0345	39	35	1.08	0.94	1.10
CM015574.1_RaGOO	1003000	45724411	0	0	0.2426	28	31	0.78	0.83	0.91
CM015574.1_RaGOO	1004000	45724411	0	0	0.1583	36	29	0.99	0.78	1.23
CM015574.1_RaGOO	1005000	45724411	0	0	0.0000	33	35	0.91	0.93	0.95
CM015574.1_RaGOO	1006000	45724411	0	0	0.0000	42	38	1.17	1.02	1.10
CM015574.1_RaGOO	1007000	45724411	0	0	0.0498	38	32	1.05	0.86	1.17
CM015574.1_RaGOO	1008000	45724411	0	0	0.0000	37	37	1.02	1.00	0.98
CM015574.1_RaGOO	1009000	45724411	0	0	0.0000	34	30	0.96	0.80	1.16
CM015574.1_RaGOO	1010000	45724411	0	0	0.0000	35	31	0.98	0.83	1.14
CM015574.1_RaGOO	1011000	45724411	0	0	0.0097	40	36	1.11	0.97	1.09
CM015574.1_RaGOO	1012000	45724411	0	0	0.0000	40	45	1.11	1.20	0.89
CM015574.1_RaGOO	1013000	45724411	0	0	0.0000	36	38	0.99	1.01	0.94
CM015574.1_RaGOO	1014000	45724411	0	0	0.0000	40	41	1.11	1.09	0.98
CM015574.1_RaGOO	1015000	45724411	0	0	0.0000	39	35	1.08	0.94	1.10
CM015574.1_RaGOO	1016000	45724411	0	0	0.0000	36	39	1.01	1.05	0.93
CM015574.1_RaGOO	1017000	45724411	0	0	0.0241	34	33	0.94	0.89	1.02
CM015574.1_RaGOO	1018000	45724411	0	0	0.0059	43	43	1.20	1.14	1.01
CM015574.1_RaGOO	1019000	45724411	0	0	0.0000	41	35	1.14	0.94	1.17
CM015574.1_RaGOO	1020000	45724411	0	0	0.0224	36	32	0.99	0.86	1.11
CM015574.1_RaGOO	1021000	45724411	0	0	0.0000	31	38	0.88	1.00	0.84
CM015574.1_RaGOO	1022000	45724411	0	0	0.0000	32	33	0.90	0.87	0.99
CM015574.1_RaGOO	1023000	45724411	0	0	0.0000	24	29	0.66	0.79	0.81
CM015574.1_RaGOO	1024000	45724411	0	0	0.0105	30	33	0.82	0.88	0.90
CM015574.1_RaGOO	1025000	45724411	1	0	0.0020	34	30	0.93	0.79	1.13
CM015574.1_RaGOO	1026000	45724411	0	0	0.0610	36	34	1.00	0.91	1.05
CM015574.1_RaGOO	1027000	45724411	0	0	0.0000	36	42	0.99	1.13	0.84
CM015574.1_RaGOO	1028000	45724411	0	0	0.0000	32	39	0.90	1.04	0.83
CM015574.1_RaGOO	1029000	45724411	0	0	0.0000	31	29	0.86	0.77	1.07
CM015574.1_RaGOO	1030000	45724411	0	0	0.0000	35	38	0.97	1.02	0.91
CM015574.1_RaGOO	1031000	45724411	0	0	0.0000	40	37	1.10	0.99	1.07
CM015574.1_RaGOO	1032000	45724411	0	0	0.0000	28	34	0.79	0.91	0.83
CM015574.1_RaGOO	1033000	45724411	0	0	0.0000	29	39	0.82	1.05	0.75
CM015574.1_RaGOO	1034000	45724411	0	1	0.0000	31	37	0.86	1.00	0.82
CM015574.1_RaGOO	1035000	45724411	0	0	0.0000	34	34	0.93	0.91	0.98
CM015574.1_RaGOO	1036000	45724411	0	0	0.0000	31	32	0.86	0.87	0.96
CM015574.1_RaGOO	1037000	45724411	0	0	0.0000	32	34	0.89	0.91	0.94
CM015574.1_RaGOO	1038000	45724411	0	0	0.0000	29	31	0.81	0.82	0.95
CM015574.1_RaGOO	1039000	45724411	0	0	0.0000	29	31	0.81	0.83	0.93
CM015574.1_RaGOO	1040000	45724411	0	0	0.0060	27	30	0.76	0.82	0.90
CM015574.1_RaGOO	1041000	45724411	0	0	0.0000	29	40	0.82	1.07	0.74
CM015574.1_RaGOO	1042000	45724411	1	0	0.0000	37	51	1.02	1.37	0.72
CM015574.1_RaGOO	1043000	45724411	0	0	0.0000	28	30	0.79	0.81	0.94
CM015574.1_RaGOO	1044000	45724411	0	0	0.0071	30	36	0.83	0.98	0.81
CM015574.1_RaGOO	1045000	45724411	0	0	0.0000	23	29	0.63	0.78	0.78
CM015574.1_RaGOO	1046000	45724411	0	0	0.0000	25	31	0.70	0.82	0.82
CM015574.1_RaGOO	1047000	45724411	0	0	0.0023	29	30	0.80	0.80	0.96
CM015574.1_RaGOO	1048000	45724411	0	0	0.0000	29	30	0.81	0.80	0.98
CM015574.1_RaGOO	1049000	45724411	0	0	0.0000	31	35	0.85	0.95	0.86
CM015574.1_RaGOO	1050000	45724411	0	0	0.0000	26	36	0.72	0.96	0.73
CM015574.1_RaGOO	1051000	45724411	0	0	0.0272	26	37	0.73	0.99	0.71
CM015574.1_RaGOO	1052000	45724411	0	0	0.0000	31	34	0.86	0.91	0.91
CM015574.1_RaGOO	1053000	45724411	0	0	0.1102	33	37	0.93	1.00	0.90
CM015574.1_RaGOO	1054000	45724411	0	0	0.0111	29	32	0.81	0.86	0.90
CM015574.1_RaGOO	1055000	45724411	0	0	0.0000	36	39	1.00	1.03	0.93
CM015574.1_RaGOO	1056000	45724411	0	0	0.0000	30	30	0.85	0.80	1.02
CM015574.1_RaGOO	1057000	45724411	0	0	0.0000	33	29	0.91	0.77	1.13
CM015574.1_RaGOO	1058000	45724411	0	0	0.0000	35	31	0.98	0.84	1.12
CM015574.1_RaGOO	1059000	45724411	0	0	0.0000	30	34	0.83	0.90	0.89
CM015574.1_RaGOO	1060000	45724411	0	0	0.0000	16	19	0.44	0.51	0.84
CM015574.1_RaGOO	1061000	45724411	0	0	0.0000	21	11	0.57	0.30	1.81
CM015574.1_RaGOO	1062000	45724411	0	0	0.0100	31	31	0.87	0.84	1.00
CM015574.1_RaGOO	1063000	45724411	0	0	0.0000	34	35	0.96	0.94	0.98
CM015574.1_RaGOO	1064000	45724411	0	0	0.0007	25	35	0.70	0.94	0.72
CM015574.1_RaGOO	1065000	45724411	0	0	0.0000	20	30	0.55	0.80	0.66
CM015574.1_RaGOO	1066000	45724411	0	0	0.0000	26	26	0.72	0.71	0.98
CM015574.1_RaGOO	1067000	45724411	0	0	0.0030	41	58	1.13	1.54	0.71
CM015574.1_RaGOO	1068000	45724411	0	0	0.0116	28	38	0.78	1.02	0.74
CM015574.1_RaGOO	1069000	45724411	0	0	0.0000	24	36	0.68	0.97	0.68
CM015574.1_RaGOO	1070000	45724411	0	0	0.0374	33	37	0.92	1.00	0.88
CM015574.1_RaGOO	1071000	45724411	0	0	0.0221	28	33	0.78	0.89	0.84
CM015574.1_RaGOO	1072000	45724411	0	0	0.0102	27	32	0.75	0.87	0.84
CM015574.1_RaGOO	1073000	45724411	0	0	0.0000	29	33	0.80	0.89	0.87
CM015574.1_RaGOO	1074000	45724411	1	0	0.0188	37	44	1.02	1.18	0.83
CM015574.1_RaGOO	1075000	45724411	0	0	0.0111	48	48	1.32	1.30	0.98
CM015574.1_RaGOO	1076000	45724411	0	0	0.0000	44	36	1.23	0.96	1.24
CM015574.1_RaGOO	1077000	45724411	0	0	0.0480	41	40	1.14	1.06	1.03
CM015574.1_RaGOO	1078000	45724411	0	0	0.0000	37	35	1.02	0.95	1.03
CM015574.1_RaGOO	1079000	45724411	0	0	0.0000	51	57	1.43	1.52	0.90
CM015574.1_RaGOO	1080000	45724411	0	0	0.0000	38	33	1.07	0.89	1.15
CM015574.1_RaGOO	1081000	45724411	0	0	0.0187	35	35	0.96	0.94	0.99
CM015574.1_RaGOO	1082000	45724411	0	0	0.0000	37	39	1.04	1.04	0.97
CM015574.1_RaGOO	1083000	45724411	0	1	0.0000	31	32	0.86	0.85	0.97
CM015574.1_RaGOO	1084000	45724411	0	0	0.0000	29	26	0.82	0.71	1.11
CM015574.1_RaGOO	1085000	45724411	1	0	0.0334	24	26	0.66	0.70	0.91
CM015574.1_RaGOO	1086000	45724411	0	0	0.0000	36	40	1.00	1.07	0.90
CM015574.1_RaGOO	1087000	45724411	0	0	0.0000	43	37	1.20	0.98	1.18
CM015574.1_RaGOO	1088000	45724411	0	0	0.0000	41	39	1.13	1.04	1.04
CM015574.1_RaGOO	1089000	45724411	0	0	0.0000	43	41	1.20	1.10	1.04
CM015574.1_RaGOO	1090000	45724411	0	0	0.0000	47	62	1.30	1.66	0.75
CM015574.1_RaGOO	1091000	45724411	0	0	0.0000	47	46	1.32	1.22	1.03
CM015574.1_RaGOO	1092000	45724411	0	0	0.0124	42	40	1.18	1.08	1.05
CM015574.1_RaGOO	1093000	45724411	0	0	0.0000	30	43	0.83	1.16	0.69
CM015574.1_RaGOO	1094000	45724411	0	0	0.0000	37	35	1.02	0.95	1.04
CM015574.1_RaGOO	1095000	45724411	0	0	0.0000	32	37	0.90	1.00	0.87
CM015574.1_RaGOO	1096000	45724411	0	0	0.0000	23	19	0.63	0.52	1.16
CM015574.1_RaGOO	1097000	45724411	0	0	0.0462	30	33	0.83	0.90	0.88
CM015574.1_RaGOO	1098000	45724411	0	0	0.0000	31	40	0.85	1.06	0.77
CM015574.1_RaGOO	1099000	45724411	0	0	0.0000	36	30	0.99	0.80	1.19
CM015574.1_RaGOO	1100000	45724411	0	0	0.0594	36	29	1.02	0.79	1.24
CM015574.1_RaGOO	1101000	45724411	0	0	0.0000	31	33	0.88	0.88	0.96
CM015574.1_RaGOO	1102000	45724411	0	0	0.0000	28	32	0.78	0.87	0.86
CM015574.1_RaGOO	1103000	45724411	0	0	0.0000	44	47	1.21	1.26	0.92
CM015574.1_RaGOO	1104000	45724411	0	0	0.0000	29	36	0.81	0.96	0.81
CM015574.1_RaGOO	1105000	45724411	0	0	0.0006	35	33	0.98	0.89	1.06
CM015574.1_RaGOO	1106000	45724411	0	0	0.0000	32	33	0.88	0.89	0.95
CM015574.1_RaGOO	1107000	45724411	0	0	0.0000	34	33	0.94	0.89	1.02
CM015574.1_RaGOO	1108000	45724411	0	0	0.0029	36	34	1.01	0.91	1.07
CM015574.1_RaGOO	1109000	45724411	0	0	0.0000	43	39	1.19	1.03	1.11
CM015574.1_RaGOO	1110000	45724411	0	0	0.0000	34	36	0.95	0.96	0.95
CM015574.1_RaGOO	1111000	45724411	0	0	0.0914	34	32	0.95	0.86	1.06
CM015574.1_RaGOO	1112000	45724411	0	0	0.0000	32	33	0.88	0.88	0.97
CM015574.1_RaGOO	1113000	45724411	0	0	0.0000	34	36	0.95	0.97	0.95
CM015574.1_RaGOO	1114000	45724411	0	0	0.0040	30	29	0.83	0.79	1.01
CM015574.1_RaGOO	1115000	45724411	0	0	0.0032	34	33	0.96	0.89	1.04
CM015574.1_RaGOO	1116000	45724411	0	0	0.0607	29	32	0.81	0.86	0.91
CM015574.1_RaGOO	1117000	45724411	0	0	0.0131	31	36	0.87	0.96	0.87
CM015574.1_RaGOO	1118000	45724411	0	0	0.0000	34	38	0.95	1.01	0.91
CM015574.1_RaGOO	1119000	45724411	0	0	0.0000	33	31	0.93	0.84	1.07
CM015574.1_RaGOO	1120000	45724411	0	0	0.0368	31	24	0.88	0.65	1.30
CM015574.1_RaGOO	1121000	45724411	0	0	0.0000	33	38	0.92	1.01	0.88
CM015574.1_RaGOO	1122000	45724411	0	0	0.0000	31	28	0.86	0.76	1.09
CM015574.1_RaGOO	1123000	45724411	0	0	0.1056	28	31	0.78	0.84	0.90
CM015574.1_RaGOO	1124000	45724411	0	0	0.0000	29	36	0.80	0.96	0.80
CM015574.1_RaGOO	1125000	45724411	0	0	0.0000	29	33	0.80	0.88	0.87
CM015574.1_RaGOO	1126000	45724411	0	0	0.0000	33	42	0.91	1.11	0.78
CM015574.1_RaGOO	1127000	45724411	0	0	0.0000	31	37	0.86	0.99	0.84
CM015574.1_RaGOO	1128000	45724411	0	0	0.0000	32	35	0.89	0.94	0.91
CM015574.1_RaGOO	1129000	45724411	0	0	0.0000	28	31	0.79	0.84	0.90
CM015574.1_RaGOO	1130000	45724411	0	0	0.0000	35	34	0.98	0.91	1.04
CM015574.1_RaGOO	1131000	45724411	0	0	0.0000	34	31	0.96	0.84	1.10
CM015574.1_RaGOO	1132000	45724411	0	0	0.0000	32	33	0.88	0.88	0.96
CM015574.1_RaGOO	1133000	45724411	0	0	0.0000	39	37	1.08	0.99	1.05
CM015574.1_RaGOO	1134000	45724411	0	0	0.0000	16	16	0.44	0.43	0.97
CM015574.1_RaGOO	1135000	45724411	0	0	0.0000	0	0	0.01	0.01	1.20
CM015574.1_RaGOO	1136000	45724411	0	0	0.0000	32	34	0.88	0.92	0.92
CM015574.1_RaGOO	1137000	45724411	0	0	0.0000	43	48	1.19	1.27	0.90
CM015574.1_RaGOO	1138000	45724411	0	0	0.0000	34	38	0.94	1.02	0.89
CM015574.1_RaGOO	1139000	45724411	0	0	0.0000	32	37	0.90	0.99	0.88
CM015574.1_RaGOO	1140000	45724411	0	0	0.0000	33	36	0.91	0.97	0.91
CM015574.1_RaGOO	1141000	45724411	0	0	0.0000	36	47	1.00	1.27	0.76
CM015574.1_RaGOO	1142000	45724411	0	0	0.0333	35	39	0.97	1.05	0.89
CM015574.1_RaGOO	1143000	45724411	0	0	0.0356	36	44	1.00	1.17	0.83
CM015574.1_RaGOO	1144000	45724411	0	0	0.0237	37	43	1.04	1.16	0.86
CM015574.1_RaGOO	1145000	45724411	0	0	0.0000	36	37	1.01	0.99	0.99
CM015574.1_RaGOO	1146000	45724411	0	0	0.0135	37	34	1.02	0.91	1.07
CM015574.1_RaGOO	1147000	45724411	0	0	0.0000	37	42	1.03	1.13	0.88
CM015574.1_RaGOO	1148000	45724411	0	0	0.0000	38	34	1.05	0.92	1.09
CM015574.1_RaGOO	1149000	45724411	0	0	0.0142	40	39	1.12	1.04	1.04
CM015574.1_RaGOO	1150000	45724411	0	0	0.0000	34	42	0.96	1.13	0.81
CM015574.1_RaGOO	1151000	45724411	0	0	0.0000	32	35	0.90	0.93	0.93
CM015574.1_RaGOO	1152000	45724411	0	0	0.0367	29	28	0.81	0.74	1.05
CM015574.1_RaGOO	1153000	45724411	0	0	0.0000	29	33	0.81	0.88	0.89
CM015574.1_RaGOO	1154000	45724411	0	0	0.0000	35	31	0.96	0.84	1.10
CM015574.1_RaGOO	1155000	45724411	0	0	0.0000	33	35	0.93	0.93	0.96
CM015574.1_RaGOO	1156000	45724411	0	0	0.0000	33	34	0.92	0.90	0.98
CM015574.1_RaGOO	1157000	45724411	0	0	0.0000	26	37	0.73	1.00	0.70
CM015574.1_RaGOO	1158000	45724411	0	0	0.0053	29	33	0.80	0.89	0.87
CM015574.1_RaGOO	1159000	45724411	0	0	0.0369	29	37	0.81	0.98	0.79
CM015574.1_RaGOO	1160000	45724411	0	0	0.1254	29	31	0.80	0.82	0.94
CM015574.1_RaGOO	1161000	45724411	0	4	0.0000	32	35	0.89	0.94	0.91
CM015574.1_RaGOO	1162000	45724411	0	0	0.0000	36	34	1.00	0.92	1.05
CM015574.1_RaGOO	1163000	45724411	0	0	0.0022	43	40	1.20	1.08	1.07
CM015574.1_RaGOO	1164000	45724411	0	0	0.0404	41	40	1.16	1.07	1.04
CM015574.1_RaGOO	1165000	45724411	0	0	0.0000	26	27	0.73	0.72	0.97
CM015574.1_RaGOO	1166000	45724411	0	0	0.0000	34	36	0.96	0.95	0.96
CM015574.1_RaGOO	1167000	45724411	0	0	0.0000	28	29	0.79	0.78	0.98
CM015574.1_RaGOO	1168000	45724411	0	0	0.0000	35	26	0.98	0.70	1.34
CM015574.1_RaGOO	1169000	45724411	0	0	0.0000	31	41	0.88	1.11	0.76
CM015574.1_RaGOO	1170000	45724411	0	0	0.0245	38	33	1.07	0.87	1.17
CM015574.1_RaGOO	1171000	45724411	0	0	0.0029	39	29	1.09	0.76	1.37
CM015574.1_RaGOO	1172000	45724411	0	0	0.0000	38	34	1.06	0.91	1.12
CM015574.1_RaGOO	1173000	45724411	0	0	0.0000	35	37	0.99	1.00	0.95
CM015574.1_RaGOO	1174000	45724411	0	0	0.0000	33	34	0.92	0.91	0.97
CM015574.1_RaGOO	1175000	45724411	0	0	0.0000	26	38	0.73	1.03	0.69
CM015574.1_RaGOO	1176000	45724411	0	0	0.0000	42	42	1.17	1.13	1.00
CM015574.1_RaGOO	1177000	45724411	0	0	0.0000	37	34	1.04	0.92	1.08
CM015574.1_RaGOO	1178000	45724411	0	0	0.0000	30	31	0.82	0.84	0.94
CM015574.1_RaGOO	1179000	45724411	0	0	0.0095	34	34	0.96	0.92	1.00
CM015574.1_RaGOO	1180000	45724411	0	0	0.0000	36	33	1.01	0.88	1.10
CM015574.1_RaGOO	1181000	45724411	0	0	0.0000	35	30	0.98	0.80	1.17
CM015574.1_RaGOO	1182000	45724411	0	0	0.0000	38	30	1.07	0.79	1.30
CM015574.1_RaGOO	1183000	45724411	0	0	0.0000	34	37	0.94	0.99	0.91
CM015574.1_RaGOO	1184000	45724411	0	0	0.0000	28	36	0.79	0.96	0.79
CM015574.1_RaGOO	1185000	45724411	0	0	0.0166	32	30	0.90	0.81	1.07
CM015574.1_RaGOO	1186000	45724411	0	0	0.0000	34	35	0.93	0.93	0.96
CM015574.1_RaGOO	1187000	45724411	0	0	0.0000	23	24	0.64	0.66	0.94
CM015574.1_RaGOO	1188000	45724411	0	0	0.0000	39	34	1.09	0.91	1.15
CM015574.1_RaGOO	1189000	45724411	0	0	0.0000	30	29	0.83	0.79	1.01
CM015574.1_RaGOO	1190000	45724411	0	0	0.0000	31	31	0.86	0.84	0.98
CM015574.1_RaGOO	1191000	45724411	0	0	0.1068	28	31	0.77	0.83	0.89
CM015574.1_RaGOO	1192000	45724411	0	0	0.0000	29	25	0.81	0.67	1.17
CM015574.1_RaGOO	1193000	45724411	0	0	0.0000	28	25	0.77	0.68	1.10
CM015574.1_RaGOO	1194000	45724411	0	0	0.0502	37	32	1.04	0.86	1.16
CM015574.1_RaGOO	1195000	45724411	0	0	0.0317	35	37	0.98	0.99	0.95
CM015574.1_RaGOO	1196000	45724411	0	0	0.0000	27	36	0.74	0.96	0.74
CM015574.1_RaGOO	1197000	45724411	0	0	0.0000	32	30	0.88	0.80	1.06
CM015574.1_RaGOO	1198000	45724411	0	0	0.0000	31	39	0.85	1.03	0.79
CM015574.1_RaGOO	1199000	45724411	0	0	0.0805	33	37	0.92	1.00	0.89
CM015574.1_RaGOO	1200000	45724411	0	0	0.0000	31	36	0.87	0.97	0.86
CM015574.1_RaGOO	1201000	45724411	0	0	0.0704	41	40	1.13	1.08	1.01
CM015574.1_RaGOO	1202000	45724411	0	0	0.0000	38	41	1.07	1.09	0.95
CM015574.1_RaGOO	1203000	45724411	0	0	0.0000	36	35	1.01	0.94	1.03
CM015574.1_RaGOO	1204000	45724411	0	0	0.0000	37	35	1.02	0.93	1.06
CM015574.1_RaGOO	1205000	45724411	0	0	0.0000	42	41	1.18	1.10	1.03
CM015574.1_RaGOO	1206000	45724411	0	0	0.0025	44	42	1.22	1.13	1.03
CM015574.1_RaGOO	1207000	45724411	0	0	0.0000	39	45	1.10	1.21	0.87
CM015574.1_RaGOO	1208000	45724411	0	0	0.0000	30	34	0.82	0.92	0.86
CM015574.1_RaGOO	1209000	45724411	0	0	0.0000	17	18	0.48	0.47	0.98
CM015574.1_RaGOO	1210000	45724411	0	0	0.0085	32	38	0.88	1.00	0.85
CM015574.1_RaGOO	1211000	45724411	0	0	0.0188	32	39	0.90	1.05	0.82
CM015574.1_RaGOO	1212000	45724411	0	0	0.0000	32	37	0.90	0.99	0.88
CM015574.1_RaGOO	1213000	45724411	0	0	0.0827	33	29	0.92	0.78	1.13
CM015574.1_RaGOO	1214000	45724411	0	0	0.0000	39	33	1.08	0.89	1.17
CM015574.1_RaGOO	1215000	45724411	0	0	0.0000	32	33	0.90	0.89	0.98
CM015574.1_RaGOO	1216000	45724411	0	0	0.0000	28	35	0.79	0.93	0.81
CM015574.1_RaGOO	1217000	45724411	0	0	0.0720	30	33	0.84	0.88	0.92
CM015574.1_RaGOO	1218000	45724411	0	0	0.0000	31	37	0.86	1.00	0.83
CM015574.1_RaGOO	1219000	45724411	0	0	0.0000	33	33	0.92	0.89	1.00
CM015574.1_RaGOO	1220000	45724411	0	0	0.0000	36	39	1.01	1.04	0.93
CM015574.1_RaGOO	1221000	45724411	0	0	0.0000	15	17	0.42	0.46	0.87
CM015574.1_RaGOO	1222000	45724411	0	0	0.0000	45	37	1.25	1.00	1.19
CM015574.1_RaGOO	1223000	45724411	0	0	0.0000	34	33	0.93	0.87	1.03
CM015574.1_RaGOO	1224000	45724411	0	0	0.0000	29	25	0.82	0.68	1.15
CM015574.1_RaGOO	1225000	45724411	0	0	0.0000	32	30	0.89	0.80	1.06
CM015574.1_RaGOO	1226000	45724411	0	0	0.0000	31	34	0.85	0.90	0.91
CM015574.1_RaGOO	1227000	45724411	0	0	0.0000	32	35	0.90	0.93	0.93
CM015574.1_RaGOO	1228000	45724411	0	0	0.1232	33	32	0.92	0.87	1.01
CM015574.1_RaGOO	1229000	45724411	0	0	0.0000	35	38	0.96	1.01	0.92
CM015574.1_RaGOO	1230000	45724411	0	0	0.0000	30	34	0.84	0.91	0.88
CM015574.1_RaGOO	1231000	45724411	0	0	0.0000	31	36	0.87	0.97	0.87
CM015574.1_RaGOO	1232000	45724411	0	0	0.0000	34	35	0.95	0.93	0.98
CM015574.1_RaGOO	1233000	45724411	0	0	0.0000	30	33	0.84	0.88	0.93
CM015574.1_RaGOO	1234000	45724411	0	0	0.0000	28	32	0.78	0.85	0.88
CM015574.1_RaGOO	1235000	45724411	0	0	0.0000	31	35	0.88	0.95	0.89
CM015574.1_RaGOO	1236000	45724411	0	0	0.0000	31	35	0.88	0.92	0.91
CM015574.1_RaGOO	1237000	45724411	0	0	0.0000	32	38	0.90	1.02	0.85
CM015574.1_RaGOO	1238000	45724411	0	1	0.0000	53	52	1.47	1.40	1.01
CM015574.1_RaGOO	1239000	45724411	0	0	0.0000	25	26	0.70	0.70	0.96
CM015574.1_RaGOO	1240000	45724411	0	0	0.0228	35	43	0.99	1.16	0.82
CM015574.1_RaGOO	1241000	45724411	0	0	0.0000	32	34	0.90	0.92	0.95
CM015574.1_RaGOO	1242000	45724411	0	0	0.0000	33	36	0.91	0.97	0.90
CM015574.1_RaGOO	1243000	45724411	0	0	0.0000	39	36	1.08	0.97	1.07
CM015574.1_RaGOO	1244000	45724411	0	0	0.0000	39	40	1.07	1.08	0.95
CM015574.1_RaGOO	1245000	45724411	0	0	0.0000	22	21	0.60	0.56	1.04
CM015574.1_RaGOO	1246000	45724411	0	0	0.0000	57	65	1.58	1.74	0.87
CM015574.1_RaGOO	1247000	45724411	0	0	0.0000	31	38	0.86	1.01	0.81
CM015574.1_RaGOO	1248000	45724411	0	0	0.0000	31	40	0.87	1.07	0.78
CM015574.1_RaGOO	1249000	45724411	0	0	0.0000	36	35	1.00	0.94	1.02
CM015574.1_RaGOO	1250000	45724411	0	0	0.0000	33	37	0.91	1.00	0.87
CM015574.1_RaGOO	1251000	45724411	0	0	0.0000	33	38	0.92	1.01	0.87
CM015574.1_RaGOO	1252000	45724411	0	0	0.0000	34	34	0.94	0.91	1.00
CM015574.1_RaGOO	1253000	45724411	0	0	0.0000	37	42	1.02	1.12	0.88
CM015574.1_RaGOO	1254000	45724411	0	0	0.0000	35	39	0.98	1.05	0.90
CM015574.1_RaGOO	1255000	45724411	1	1	0.0000	25	26	0.70	0.70	0.97
CM015574.1_RaGOO	1256000	45724411	0	0	0.0000	45	46	1.26	1.24	0.98
CM015574.1_RaGOO	1257000	45724411	0	0	0.0000	32	38	0.90	1.03	0.84
CM015574.1_RaGOO	1258000	45724411	0	0	0.0000	36	37	1.01	1.00	0.97
CM015574.1_RaGOO	1259000	45724411	0	0	0.0000	35	37	0.98	1.00	0.95
CM015574.1_RaGOO	1260000	45724411	0	0	0.0000	34	38	0.95	1.01	0.90
CM015574.1_RaGOO	1261000	45724411	0	0	0.0000	29	29	0.80	0.78	0.99
CM015574.1_RaGOO	1262000	45724411	0	0	0.0000	30	27	0.84	0.73	1.10
CM015574.1_RaGOO	1263000	45724411	0	0	0.0000	29	35	0.82	0.94	0.84
CM015574.1_RaGOO	1264000	45724411	0	0	0.0000	33	38	0.92	1.02	0.86
CM015574.1_RaGOO	1265000	45724411	0	0	0.0000	30	32	0.85	0.86	0.95
CM015574.1_RaGOO	1266000	45724411	0	0	0.0000	31	37	0.86	0.99	0.84
CM015574.1_RaGOO	1267000	45724411	0	0	0.0349	33	43	0.93	1.14	0.78
CM015574.1_RaGOO	1268000	45724411	0	0	0.0000	35	34	0.98	0.90	1.05
CM015574.1_RaGOO	1269000	45724411	0	0	0.0000	39	29	1.08	0.79	1.31
CM015574.1_RaGOO	1270000	45724411	0	0	0.0000	23	21	0.64	0.56	1.10
CM015574.1_RaGOO	1271000	45724411	0	0	0.0000	29	31	0.80	0.82	0.93
CM015574.1_RaGOO	1272000	45724411	0	0	0.0000	37	31	1.03	0.82	1.20
CM015574.1_RaGOO	1273000	45724411	0	0	0.0000	36	27	1.02	0.72	1.36
CM015574.1_RaGOO	1274000	45724411	0	0	0.0000	28	34	0.79	0.91	0.83
CM015574.1_RaGOO	1275000	45724411	0	0	0.0000	29	38	0.80	1.03	0.75
CM015574.1_RaGOO	1276000	45724411	0	0	0.0000	34	29	0.94	0.77	1.18
CM015574.1_RaGOO	1277000	45724411	0	0	0.0000	36	30	1.00	0.79	1.22
CM015574.1_RaGOO	1278000	45724411	0	0	0.0379	32	36	0.90	0.97	0.89
CM015574.1_RaGOO	1279000	45724411	0	0	0.0000	30	29	0.84	0.78	1.03
CM015574.1_RaGOO	1280000	45724411	0	0	0.0586	34	35	0.93	0.95	0.95
CM015574.1_RaGOO	1281000	45724411	0	0	0.0000	36	37	1.01	1.00	0.97
CM015574.1_RaGOO	1282000	45724411	0	0	0.0000	32	30	0.89	0.82	1.05
CM015574.1_RaGOO	1283000	45724411	0	0	0.0000	26	31	0.73	0.82	0.86
CM015574.1_RaGOO	1284000	45724411	0	0	0.0000	31	31	0.87	0.83	1.01
CM015574.1_RaGOO	1285000	45724411	0	0	0.0000	32	34	0.90	0.90	0.95
CM015574.1_RaGOO	1286000	45724411	0	0	0.0000	31	35	0.85	0.93	0.89
CM015574.1_RaGOO	1287000	45724411	0	3	0.0000	25	23	0.70	0.62	1.08
CM015574.1_RaGOO	1288000	45724411	0	0	0.0000	37	37	1.02	0.99	0.99
CM015574.1_RaGOO	1289000	45724411	0	0	0.0027	32	34	0.89	0.91	0.94
CM015574.1_RaGOO	1290000	45724411	0	0	0.0000	38	40	1.04	1.07	0.94
CM015574.1_RaGOO	1291000	45724411	0	0	0.0000	38	38	1.06	1.02	1.00
CM015574.1_RaGOO	1292000	45724411	0	0	0.0000	36	33	1.00	0.90	1.07
CM015574.1_RaGOO	1293000	45724411	0	0	0.0000	32	38	0.89	1.00	0.85
CM015574.1_RaGOO	1294000	45724411	0	0	0.0000	26	32	0.73	0.85	0.82
CM015574.1_RaGOO	1295000	45724411	0	0	0.0000	29	40	0.82	1.08	0.73
CM015574.1_RaGOO	1296000	45724411	0	0	0.0000	27	38	0.74	1.02	0.70
CM015574.1_RaGOO	1297000	45724411	0	0	0.0000	32	32	0.89	0.86	1.00
CM015574.1_RaGOO	1298000	45724411	0	0	0.0000	33	35	0.91	0.93	0.94
CM015574.1_RaGOO	1299000	45724411	0	0	0.0000	30	34	0.82	0.90	0.88
CM015574.1_RaGOO	1300000	45724411	0	0	0.0000	36	35	1.00	0.94	1.03
CM015574.1_RaGOO	1301000	45724411	0	0	0.0000	31	37	0.87	1.00	0.84
CM015574.1_RaGOO	1302000	45724411	0	0	0.0000	30	32	0.84	0.85	0.96
CM015574.1_RaGOO	1303000	45724411	0	0	0.0000	38	44	1.05	1.17	0.86
CM015574.1_RaGOO	1304000	45724411	0	0	0.0000	41	39	1.15	1.05	1.05
CM015574.1_RaGOO	1305000	45724411	0	0	0.0000	40	42	1.11	1.13	0.94
CM015574.1_RaGOO	1306000	45724411	0	0	0.0000	38	41	1.05	1.09	0.93
CM015574.1_RaGOO	1307000	45724411	0	0	0.0562	39	38	1.07	1.01	1.02
CM015574.1_RaGOO	1308000	45724411	0	0	0.0000	41	41	1.13	1.10	0.99
CM015574.1_RaGOO	1309000	45724411	0	0	0.0000	38	37	1.06	1.00	1.02
CM015574.1_RaGOO	1310000	45724411	0	0	0.0000	32	36	0.90	0.96	0.90
CM015574.1_RaGOO	1311000	45724411	0	0	0.0000	33	29	0.91	0.79	1.11
CM015574.1_RaGOO	1312000	45724411	0	0	0.0000	28	33	0.79	0.88	0.86
CM015574.1_RaGOO	1313000	45724411	0	0	0.0000	28	35	0.77	0.94	0.79
CM015574.1_RaGOO	1314000	45724411	0	0	0.0000	29	32	0.82	0.86	0.92
CM015574.1_RaGOO	1315000	45724411	0	0	0.0000	31	29	0.86	0.76	1.09
CM015574.1_RaGOO	1316000	45724411	0	0	0.0000	32	31	0.88	0.83	1.02
CM015574.1_RaGOO	1317000	45724411	0	0	0.0000	34	36	0.94	0.96	0.94
CM015574.1_RaGOO	1318000	45724411	0	0	0.0000	36	41	1.01	1.10	0.89
CM015574.1_RaGOO	1319000	45724411	0	0	0.0000	30	35	0.82	0.93	0.85
CM015574.1_RaGOO	1320000	45724411	0	0	0.0000	28	30	0.77	0.79	0.93
CM015574.1_RaGOO	1321000	45724411	0	0	0.0000	28	27	0.78	0.72	1.04
CM015574.1_RaGOO	1322000	45724411	0	0	0.0000	30	30	0.83	0.81	0.99
CM015574.1_RaGOO	1323000	45724411	0	0	0.0000	30	29	0.84	0.78	1.04
CM015574.1_RaGOO	1324000	45724411	0	0	0.0000	33	31	0.92	0.82	1.07
CM015574.1_RaGOO	1325000	45724411	0	3	0.0000	23	27	0.64	0.72	0.85
CM015574.1_RaGOO	1326000	45724411	0	0	0.0000	22	23	0.62	0.60	0.99
CM015574.1_RaGOO	1327000	45724411	0	0	0.0000	29	31	0.82	0.82	0.96
CM015574.1_RaGOO	1328000	45724411	0	0	0.0000	28	32	0.78	0.87	0.87
CM015574.1_RaGOO	1329000	45724411	0	0	0.0000	24	26	0.67	0.70	0.92
CM015574.1_RaGOO	1330000	45724411	0	0	0.0000	27	25	0.74	0.66	1.07
CM015574.1_RaGOO	1331000	45724411	0	0	0.0000	29	38	0.82	1.01	0.78
CM015574.1_RaGOO	1332000	45724411	0	0	0.0000	24	28	0.66	0.74	0.86
CM015574.1_RaGOO	1333000	45724411	0	0	0.0000	28	31	0.79	0.83	0.91
CM015574.1_RaGOO	1334000	45724411	1	0	0.0000	28	28	0.77	0.75	0.99
CM015574.1_RaGOO	1335000	45724411	0	0	0.0000	32	38	0.90	1.02	0.85
CM015574.1_RaGOO	1336000	45724411	0	0	0.0000	32	34	0.89	0.90	0.95
CM015574.1_RaGOO	1337000	45724411	0	0	0.0000	25	34	0.70	0.90	0.74
CM015574.1_RaGOO	1338000	45724411	0	0	0.0307	27	31	0.74	0.82	0.87
CM015574.1_RaGOO	1339000	45724411	0	0	0.1837	26	38	0.74	1.02	0.69
CM015574.1_RaGOO	1340000	45724411	0	0	0.0000	35	49	0.99	1.31	0.72
CM015574.1_RaGOO	1341000	45724411	0	0	0.0000	40	40	1.11	1.07	1.00
CM015574.1_RaGOO	1342000	45724411	0	0	0.0000	29	28	0.80	0.76	1.02
CM015574.1_RaGOO	1343000	45724411	0	0	0.0000	26	28	0.73	0.76	0.92
CM015574.1_RaGOO	1344000	45724411	0	0	0.0000	33	33	0.91	0.88	0.99
CM015574.1_RaGOO	1345000	45724411	0	0	0.0000	30	33	0.85	0.88	0.92
CM015574.1_RaGOO	1346000	45724411	0	0	0.0000	29	29	0.80	0.78	0.99
CM015574.1_RaGOO	1347000	45724411	0	0	0.0000	34	36	0.93	0.97	0.93
CM015574.1_RaGOO	1348000	45724411	0	0	0.0000	32	34	0.88	0.92	0.92
CM015574.1_RaGOO	1349000	45724411	1	0	0.0000	29	29	0.81	0.78	0.99
CM015574.1_RaGOO	1350000	45724411	0	0	0.0000	37	38	1.02	1.02	0.96
CM015574.1_RaGOO	1351000	45724411	0	0	0.0000	31	37	0.87	0.98	0.86
CM015574.1_RaGOO	1352000	45724411	0	0	0.0000	34	30	0.94	0.81	1.12
CM015574.1_RaGOO	1353000	45724411	0	0	0.0000	33	29	0.93	0.78	1.15
CM015574.1_RaGOO	1354000	45724411	0	0	0.0000	27	32	0.75	0.86	0.83
CM015574.1_RaGOO	1355000	45724411	0	0	0.0437	30	30	0.84	0.80	1.01
CM015574.1_RaGOO	1356000	45724411	0	0	0.0000	35	37	0.97	0.99	0.94
CM015574.1_RaGOO	1357000	45724411	0	0	0.0000	28	29	0.79	0.78	0.97
CM015574.1_RaGOO	1358000	45724411	0	0	0.0000	30	34	0.83	0.91	0.88
CM015574.1_RaGOO	1359000	45724411	0	0	0.0217	30	37	0.83	1.00	0.80
CM015574.1_RaGOO	1360000	45724411	0	0	0.0000	31	28	0.87	0.76	1.10
CM015574.1_RaGOO	1361000	45724411	0	0	0.0000	26	25	0.73	0.67	1.05
CM015574.1_RaGOO	1362000	45724411	0	0	0.0000	26	30	0.73	0.81	0.86
CM015574.1_RaGOO	1363000	45724411	0	0	0.0000	27	32	0.74	0.85	0.84
CM015574.1_RaGOO	1364000	45724411	0	0	0.0052	26	27	0.71	0.71	0.96
CM015574.1_RaGOO	1365000	45724411	0	0	0.0811	29	31	0.80	0.82	0.93
CM015574.1_RaGOO	1366000	45724411	0	0	0.0000	33	30	0.92	0.80	1.11
CM015574.1_RaGOO	1367000	45724411	0	0	0.0000	27	29	0.75	0.77	0.94
CM015574.1_RaGOO	1368000	45724411	0	0	0.0000	29	37	0.82	0.99	0.79
CM015574.1_RaGOO	1369000	45724411	0	0	0.0000	30	31	0.84	0.82	0.99
CM015574.1_RaGOO	1370000	45724411	0	0	0.0187	33	37	0.93	0.98	0.92
CM015574.1_RaGOO	1371000	45724411	0	0	0.0000	36	33	1.01	0.88	1.10
CM015574.1_RaGOO	1372000	45724411	0	0	0.0000	29	28	0.81	0.74	1.04
CM015574.1_RaGOO	1373000	45724411	0	0	0.0000	37	38	1.04	1.01	0.99
CM015574.1_RaGOO	1374000	45724411	0	0	0.0915	30	32	0.82	0.87	0.91
CM015574.1_RaGOO	1375000	45724411	0	0	0.0000	53	52	1.48	1.40	1.02
CM015574.1_RaGOO	1376000	45724411	0	0	0.0000	32	34	0.88	0.92	0.92
CM015574.1_RaGOO	1377000	45724411	0	0	0.0000	37	33	1.04	0.88	1.13
CM015574.1_RaGOO	1378000	45724411	0	0	0.0000	40	35	1.10	0.94	1.12
CM015574.1_RaGOO	1379000	45724411	0	0	0.0000	38	33	1.05	0.88	1.14
CM015574.1_RaGOO	1380000	45724411	0	0	0.0000	36	33	1.01	0.87	1.11
CM015574.1_RaGOO	1381000	45724411	0	0	0.0022	38	37	1.05	0.98	1.02
CM015574.1_RaGOO	1382000	45724411	0	0	0.0000	32	30	0.88	0.81	1.04
CM015574.1_RaGOO	1383000	45724411	0	0	0.0000	33	31	0.92	0.82	1.07
CM015574.1_RaGOO	1384000	45724411	0	0	0.0036	32	29	0.88	0.77	1.10
CM015574.1_RaGOO	1385000	45724411	0	0	0.0000	36	32	1.00	0.86	1.11
CM015574.1_RaGOO	1386000	45724411	0	0	0.0000	33	34	0.91	0.91	0.96
CM015574.1_RaGOO	1387000	45724411	0	0	0.0000	30	33	0.84	0.88	0.92
CM015574.1_RaGOO	1388000	45724411	0	0	0.0000	32	33	0.90	0.88	0.99
CM015574.1_RaGOO	1389000	45724411	0	0	0.0000	29	32	0.79	0.85	0.90
CM015574.1_RaGOO	1390000	45724411	0	0	0.0000	34	33	0.94	0.90	1.01
CM015574.1_RaGOO	1391000	45724411	0	0	0.0000	25	31	0.69	0.83	0.80
CM015574.1_RaGOO	1392000	45724411	0	0	0.0000	24	33	0.67	0.87	0.74
CM015574.1_RaGOO	1393000	45724411	0	0	0.0000	30	34	0.84	0.92	0.88
CM015574.1_RaGOO	1394000	45724411	0	0	0.0000	25	32	0.69	0.85	0.78
CM015574.1_RaGOO	1395000	45724411	0	0	0.0000	25	26	0.71	0.70	0.98
CM015574.1_RaGOO	1396000	45724411	0	0	0.0000	27	36	0.74	0.96	0.75
CM015574.1_RaGOO	1397000	45724411	0	0	0.0002	27	33	0.75	0.87	0.83
CM015574.1_RaGOO	1398000	45724411	0	0	0.0000	33	32	0.93	0.86	1.03
CM015574.1_RaGOO	1399000	45724411	0	0	0.0000	31	32	0.86	0.86	0.96
CM015574.1_RaGOO	1400000	45724411	0	0	0.0000	28	29	0.78	0.77	0.97
CM015574.1_RaGOO	1401000	45724411	0	0	0.0000	32	34	0.89	0.90	0.95
CM015574.1_RaGOO	1402000	45724411	0	0	0.0000	29	33	0.82	0.89	0.89
CM015574.1_RaGOO	1403000	45724411	0	0	0.0000	31	33	0.86	0.90	0.92
CM015574.1_RaGOO	1404000	45724411	0	1	0.0000	27	36	0.74	0.96	0.74
CM015574.1_RaGOO	1405000	45724411	0	0	0.0151	30	36	0.83	0.97	0.83
CM015574.1_RaGOO	1406000	45724411	0	0	0.0448	33	35	0.92	0.94	0.95
CM015574.1_RaGOO	1407000	45724411	0	0	0.0000	40	36	1.11	0.97	1.09
CM015574.1_RaGOO	1408000	45724411	0	0	0.0001	26	36	0.72	0.98	0.71
CM015574.1_RaGOO	1409000	45724411	0	0	0.0000	21	21	0.60	0.56	1.02
CM015574.1_RaGOO	1410000	45724411	0	0	0.0000	31	37	0.86	0.98	0.85
CM015574.1_RaGOO	1411000	45724411	0	0	0.0000	37	41	1.04	1.11	0.90
CM015574.1_RaGOO	1412000	45724411	0	0	0.0000	34	28	0.96	0.76	1.21
CM015574.1_RaGOO	1413000	45724411	0	0	0.0000	31	35	0.85	0.92	0.88
CM015574.1_RaGOO	1414000	45724411	0	0	0.0036	31	32	0.87	0.86	0.96
CM015574.1_RaGOO	1415000	45724411	0	0	0.0493	32	31	0.90	0.84	1.04
CM015574.1_RaGOO	1416000	45724411	0	0	0.0000	30	35	0.84	0.95	0.85
CM015574.1_RaGOO	1417000	45724411	0	0	0.0000	35	38	0.96	1.02	0.91
CM015574.1_RaGOO	1418000	45724411	0	0	0.0000	34	35	0.94	0.93	0.96
CM015574.1_RaGOO	1419000	45724411	0	0	0.0000	32	30	0.89	0.80	1.07
CM015574.1_RaGOO	1420000	45724411	0	0	0.0000	32	33	0.90	0.89	0.98
CM015574.1_RaGOO	1421000	45724411	0	0	0.0000	35	38	0.97	1.03	0.91
CM015574.1_RaGOO	1422000	45724411	0	0	0.0000	29	33	0.80	0.87	0.88
CM015574.1_RaGOO	1423000	45724411	0	0	0.0000	34	31	0.94	0.83	1.08
CM015574.1_RaGOO	1424000	45724411	0	0	0.0000	31	32	0.86	0.86	0.95
CM015574.1_RaGOO	1425000	45724411	0	0	0.0000	36	29	0.99	0.77	1.24
CM015574.1_RaGOO	1426000	45724411	0	0	0.0644	28	30	0.79	0.80	0.94
CM015574.1_RaGOO	1427000	45724411	0	0	0.0000	26	30	0.73	0.80	0.87
CM015574.1_RaGOO	1428000	45724411	0	0	0.0000	23	29	0.65	0.78	0.80
CM015574.1_RaGOO	1429000	45724411	0	0	0.0000	29	30	0.80	0.80	0.97
CM015574.1_RaGOO	1430000	45724411	0	0	0.0026	32	30	0.88	0.81	1.04
CM015574.1_RaGOO	1431000	45724411	0	0	0.0000	27	44	0.76	1.17	0.63
CM015574.1_RaGOO	1432000	45724411	0	0	0.0000	30	31	0.83	0.83	0.96
CM015574.1_RaGOO	1433000	45724411	0	0	0.0189	28	35	0.79	0.94	0.81
CM015574.1_RaGOO	1434000	45724411	0	0	0.0609	29	30	0.80	0.80	0.97
CM015574.1_RaGOO	1435000	45724411	0	0	0.0090	29	33	0.80	0.88	0.88
CM015574.1_RaGOO	1436000	45724411	0	0	0.0000	32	37	0.90	1.00	0.87
CM015574.1_RaGOO	1437000	45724411	0	0	0.0000	31	27	0.86	0.73	1.13
CM015574.1_RaGOO	1438000	45724411	0	0	0.0528	32	39	0.88	1.06	0.80
CM015574.1_RaGOO	1439000	45724411	0	0	0.0000	34	36	0.95	0.97	0.94
CM015574.1_RaGOO	1440000	45724411	0	0	0.0000	30	39	0.84	1.04	0.78
CM015574.1_RaGOO	1441000	45724411	0	0	0.0000	26	34	0.71	0.91	0.76
CM015574.1_RaGOO	1442000	45724411	0	0	0.0128	31	30	0.85	0.80	1.02
CM015574.1_RaGOO	1443000	45724411	0	0	0.0049	32	31	0.89	0.84	1.02
CM015574.1_RaGOO	1444000	45724411	0	0	0.0079	30	30	0.85	0.79	1.03
CM015574.1_RaGOO	1445000	45724411	0	0	0.0000	33	37	0.93	0.99	0.91
CM015574.1_RaGOO	1446000	45724411	0	0	0.0000	36	31	1.00	0.82	1.17
CM015574.1_RaGOO	1447000	45724411	0	0	0.0428	28	32	0.79	0.85	0.90
CM015574.1_RaGOO	1448000	45724411	0	0	0.0073	39	42	1.08	1.13	0.92
CM015574.1_RaGOO	1449000	45724411	0	0	0.0002	28	28	0.77	0.75	0.98
CM015574.1_RaGOO	1450000	45724411	0	0	0.0221	27	35	0.74	0.95	0.75
CM015574.1_RaGOO	1451000	45724411	0	0	0.0000	26	21	0.73	0.56	1.25
CM015574.1_RaGOO	1452000	45724411	0	0	0.0000	23	30	0.63	0.79	0.77
CM015574.1_RaGOO	1453000	45724411	0	0	0.0000	32	33	0.89	0.87	0.98
CM015574.1_RaGOO	1454000	45724411	0	0	0.0352	33	31	0.91	0.83	1.05
CM015574.1_RaGOO	1455000	45724411	0	0	0.0060	37	32	1.03	0.86	1.14
CM015574.1_RaGOO	1456000	45724411	0	0	0.0171	32	28	0.89	0.76	1.12
CM015574.1_RaGOO	1457000	45724411	0	16	0.0056	23	30	0.64	0.80	0.77
CM015574.1_RaGOO	1458000	45724411	0	0	0.0370	29	34	0.82	0.91	0.86
CM015574.1_RaGOO	1459000	45724411	0	1	0.0000	26	35	0.73	0.93	0.75
CM015574.1_RaGOO	1460000	45724411	0	0	0.0000	33	41	0.91	1.10	0.79
CM015574.1_RaGOO	1461000	45724411	0	2	0.0570	33	34	0.91	0.91	0.97
CM015574.1_RaGOO	1462000	45724411	0	0	0.0944	31	35	0.88	0.95	0.89
CM015574.1_RaGOO	1463000	45724411	0	5	0.0221	28	31	0.79	0.82	0.92
CM015574.1_RaGOO	1464000	45724411	0	0	0.0081	35	34	0.98	0.90	1.05
CM015574.1_RaGOO	1465000	45724411	0	0	0.0256	36	34	1.00	0.92	1.04
CM015574.1_RaGOO	1466000	45724411	0	0	0.0629	35	32	0.97	0.86	1.08
CM015574.1_RaGOO	1467000	45724411	0	0	0.0422	42	36	1.17	0.96	1.17
CM015574.1_RaGOO	1468000	45724411	0	0	0.0000	38	36	1.06	0.97	1.05
CM015574.1_RaGOO	1469000	45724411	0	0	0.0612	36	37	1.01	0.99	0.97
CM015574.1_RaGOO	1470000	45724411	0	0	0.0156	33	37	0.91	0.98	0.89
CM015574.1_RaGOO	1471000	45724411	0	0	0.0000	29	27	0.80	0.72	1.07
CM015574.1_RaGOO	1472000	45724411	0	0	0.0000	40	38	1.10	1.01	1.05
CM015574.1_RaGOO	1473000	45724411	3	0	0.0000	27	31	0.74	0.84	0.85
CM015574.1_RaGOO	1474000	45724411	0	0	0.0000	29	35	0.81	0.94	0.83
CM015574.1_RaGOO	1475000	45724411	0	0	0.0000	39	47	1.08	1.26	0.82
CM015574.1_RaGOO	1476000	45724411	0	0	0.0000	36	39	1.02	1.05	0.93
CM015574.1_RaGOO	1477000	45724411	0	0	0.0000	38	35	1.05	0.94	1.07
CM015574.1_RaGOO	1478000	45724411	0	0	0.0000	36	30	1.00	0.79	1.22
CM015574.1_RaGOO	1479000	45724411	0	0	0.0143	29	31	0.80	0.83	0.92
CM015574.1_RaGOO	1480000	45724411	0	0	0.0000	30	37	0.84	0.99	0.82
CM015574.1_RaGOO	1481000	45724411	0	0	0.0000	35	35	0.98	0.95	0.99
CM015574.1_RaGOO	1482000	45724411	0	0	0.0000	35	40	0.97	1.08	0.86
CM015574.1_RaGOO	1483000	45724411	0	0	0.0000	28	24	0.79	0.65	1.15
CM015574.1_RaGOO	1484000	45724411	0	0	0.0000	31	34	0.86	0.90	0.91
CM015574.1_RaGOO	1485000	45724411	0	0	0.0000	30	38	0.83	1.01	0.79
CM015574.1_RaGOO	1486000	45724411	0	0	0.0000	30	28	0.83	0.76	1.05
CM015574.1_RaGOO	1487000	45724411	0	0	0.0049	32	33	0.90	0.88	0.98
CM015574.1_RaGOO	1488000	45724411	0	0	0.0000	29	34	0.80	0.91	0.84
CM015574.1_RaGOO	1489000	45724411	0	0	0.0000	26	30	0.73	0.81	0.86
CM015574.1_RaGOO	1490000	45724411	0	0	0.0000	27	27	0.75	0.72	1.00
CM015574.1_RaGOO	1491000	45724411	0	0	0.0000	24	31	0.67	0.82	0.79
CM015574.1_RaGOO	1492000	45724411	0	2	0.0000	24	30	0.68	0.79	0.83
CM015574.1_RaGOO	1493000	45724411	0	0	0.0417	32	36	0.90	0.96	0.90
CM015574.1_RaGOO	1494000	45724411	0	0	0.0000	37	36	1.02	0.96	1.02
CM015574.1_RaGOO	1495000	45724411	0	0	0.0000	34	38	0.94	1.02	0.88
CM015574.1_RaGOO	1496000	45724411	0	0	0.0000	33	37	0.92	0.98	0.91
CM015574.1_RaGOO	1497000	45724411	0	0	0.0091	27	37	0.75	1.00	0.73
CM015574.1_RaGOO	1498000	45724411	0	0	0.0000	31	33	0.86	0.89	0.94
CM015574.1_RaGOO	1499000	45724411	0	0	0.0000	40	33	1.11	0.90	1.19
CM015574.1_RaGOO	1500000	45724411	0	0	0.0000	40	32	1.12	0.86	1.25
CM015574.1_RaGOO	1501000	45724411	0	0	0.0050	48	40	1.34	1.06	1.21
CM015574.1_RaGOO	1502000	45724411	0	0	0.0589	37	36	1.02	0.97	1.01
CM015574.1_RaGOO	1503000	45724411	0	0	0.0000	35	34	0.98	0.90	1.05
CM015574.1_RaGOO	1504000	45724411	0	0	0.0000	35	35	0.98	0.95	0.99
CM015574.1_RaGOO	1505000	45724411	0	0	0.0000	31	39	0.86	1.05	0.78
CM015574.1_RaGOO	1506000	45724411	0	0	0.0000	29	34	0.80	0.90	0.86
CM015574.1_RaGOO	1507000	45724411	0	0	0.0000	35	32	0.96	0.86	1.08
CM015574.1_RaGOO	1508000	45724411	0	0	0.0000	27	34	0.75	0.90	0.80
CM015574.1_RaGOO	1509000	45724411	0	0	0.0208	28	34	0.79	0.91	0.83
CM015574.1_RaGOO	1510000	45724411	0	0	0.0000	63	64	1.75	1.70	0.99
CM015574.1_RaGOO	1511000	45724411	0	0	0.0116	28	28	0.78	0.75	1.01
CM015574.1_RaGOO	1512000	45724411	0	0	0.0189	38	35	1.06	0.94	1.08
CM015574.1_RaGOO	1513000	45724411	0	0	0.0430	32	34	0.90	0.90	0.96
CM015574.1_RaGOO	1514000	45724411	0	0	0.0421	40	34	1.12	0.92	1.17
CM015574.1_RaGOO	1515000	45724411	0	0	0.0056	36	36	0.99	0.96	0.99
CM015574.1_RaGOO	1516000	45724411	0	0	0.0014	36	37	1.01	0.98	0.99
CM015574.1_RaGOO	1517000	45724411	0	0	0.0000	31	30	0.87	0.80	1.05
CM015574.1_RaGOO	1518000	45724411	0	0	0.0150	31	39	0.86	1.05	0.79
CM015574.1_RaGOO	1519000	45724411	0	0	0.0178	36	37	0.99	1.00	0.95
CM015574.1_RaGOO	1520000	45724411	0	0	0.0000	50	57	1.39	1.53	0.87
CM015574.1_RaGOO	1521000	45724411	0	0	0.0000	39	36	1.08	0.96	1.08
CM015574.1_RaGOO	1522000	45724411	0	0	0.0000	35	37	0.98	0.98	0.96
CM015574.1_RaGOO	1523000	45724411	0	0	0.0000	46	36	1.29	0.96	1.29
CM015574.1_RaGOO	1524000	45724411	0	0	0.0200	34	33	0.95	0.89	1.02
CM015574.1_RaGOO	1525000	45724411	0	0	0.0000	28	28	0.77	0.76	0.97
CM015574.1_RaGOO	1526000	45724411	0	0	0.0000	32	40	0.88	1.08	0.78
CM015574.1_RaGOO	1527000	45724411	0	0	0.0000	31	33	0.87	0.88	0.95
CM015574.1_RaGOO	1528000	45724411	0	0	0.0092	35	34	0.98	0.91	1.03
CM015574.1_RaGOO	1529000	45724411	0	0	0.0000	25	28	0.71	0.76	0.90
CM015574.1_RaGOO	1530000	45724411	0	0	0.0000	32	32	0.90	0.85	1.02
CM015574.1_RaGOO	1531000	45724411	0	0	0.0000	35	35	0.98	0.95	0.99
CM015574.1_RaGOO	1532000	45724411	0	0	0.0000	31	27	0.85	0.73	1.12
CM015574.1_RaGOO	1533000	45724411	0	0	0.0194	38	32	1.06	0.86	1.19
CM015574.1_RaGOO	1534000	45724411	0	0	0.0180	35	36	0.99	0.96	0.99
CM015574.1_RaGOO	1535000	45724411	0	0	0.0006	57	72	1.58	1.93	0.79
CM015574.1_RaGOO	1536000	45724411	0	0	0.0002	24	30	0.66	0.80	0.79
CM015574.1_RaGOO	1537000	45724411	0	0	0.0091	33	38	0.91	1.01	0.87
CM015574.1_RaGOO	1538000	45724411	0	0	0.0873	25	30	0.70	0.80	0.84
CM015574.1_RaGOO	1539000	45724411	0	0	0.0000	33	42	0.92	1.13	0.78
CM015574.1_RaGOO	1540000	45724411	0	0	0.0000	28	26	0.77	0.70	1.06
CM015574.1_RaGOO	1541000	45724411	0	0	0.0136	31	34	0.87	0.92	0.91
CM015574.1_RaGOO	1542000	45724411	0	0	0.0234	30	31	0.83	0.83	0.96
CM015574.1_RaGOO	1543000	45724411	0	0	0.0317	29	32	0.81	0.85	0.92
CM015574.1_RaGOO	1544000	45724411	0	0	0.0923	34	34	0.96	0.92	1.00
CM015574.1_RaGOO	1545000	45724411	0	0	0.0000	34	31	0.95	0.83	1.10
CM015574.1_RaGOO	1546000	45724411	0	0	0.0000	3	3	0.09	0.08	1.13
CM015574.1_RaGOO	1547000	45724411	0	0	0.0000	0	0	0.01	0.00	1.00
CM015574.1_RaGOO	1548000	45724411	0	0	0.0000	17	11	0.48	0.30	1.54
CM015574.1_RaGOO	1549000	45724411	0	0	0.0432	32	33	0.88	0.90	0.94
CM015574.1_RaGOO	1550000	45724411	0	0	0.0241	31	33	0.87	0.90	0.93
CM015574.1_RaGOO	1551000	45724411	0	0	0.0000	33	29	0.93	0.79	1.14
CM015574.1_RaGOO	1552000	45724411	0	0	0.0000	24	26	0.68	0.68	0.96
CM015574.1_RaGOO	1553000	45724411	0	0	0.0000	24	28	0.67	0.76	0.85
CM015574.1_RaGOO	1554000	45724411	0	0	0.0000	32	42	0.90	1.12	0.77
CM015574.1_RaGOO	1555000	45724411	0	0	0.0000	27	28	0.76	0.76	0.96
CM015574.1_RaGOO	1556000	45724411	0	0	0.0000	28	31	0.78	0.83	0.90
CM015574.1_RaGOO	1557000	45724411	0	0	0.0018	36	34	1.00	0.91	1.06
CM015574.1_RaGOO	1558000	45724411	0	0	0.0000	31	32	0.86	0.85	0.97
CM015574.1_RaGOO	1559000	45724411	0	0	0.0000	37	38	1.04	1.01	0.99
CM015574.1_RaGOO	1560000	45724411	0	0	0.0000	37	32	1.04	0.85	1.18
CM015574.1_RaGOO	1561000	45724411	1	0	0.0000	46	46	1.29	1.23	1.01
CM015574.1_RaGOO	1562000	45724411	0	0	0.0000	29	26	0.80	0.71	1.09
CM015574.1_RaGOO	1563000	45724411	0	0	0.0106	36	36	0.99	0.96	1.00
CM015574.1_RaGOO	1564000	45724411	0	0	0.0001	38	34	1.05	0.91	1.11
CM015574.1_RaGOO	1565000	45724411	0	0	0.0000	39	35	1.07	0.93	1.10
CM015574.1_RaGOO	1566000	45724411	0	0	0.0322	39	34	1.09	0.91	1.15
CM015574.1_RaGOO	1567000	45724411	0	0	0.0000	35	40	0.98	1.06	0.88
CM015574.1_RaGOO	1568000	45724411	0	0	0.0456	35	41	0.99	1.09	0.87
CM015574.1_RaGOO	1569000	45724411	0	0	0.0575	43	38	1.18	1.02	1.11
CM015574.1_RaGOO	1570000	45724411	0	0	0.0000	36	44	1.00	1.17	0.82
CM015574.1_RaGOO	1571000	45724411	0	0	0.0000	35	45	0.96	1.20	0.77
CM015574.1_RaGOO	1572000	45724411	0	0	0.1439	34	40	0.96	1.08	0.85
CM015574.1_RaGOO	1573000	45724411	0	7	0.0000	30	40	0.84	1.07	0.75
CM015574.1_RaGOO	1574000	45724411	0	0	0.0000	33	37	0.92	0.99	0.89
CM015574.1_RaGOO	1575000	45724411	0	13	0.0000	37	36	1.02	0.97	1.01
CM015574.1_RaGOO	1576000	45724411	0	0	0.0000	35	40	0.97	1.06	0.88
CM015574.1_RaGOO	1577000	45724411	0	0	0.0000	28	35	0.77	0.93	0.80
CM015574.1_RaGOO	1578000	45724411	0	0	0.0000	26	45	0.72	1.20	0.58
CM015574.1_RaGOO	1579000	45724411	0	0	0.0288	39	34	1.08	0.91	1.14
CM015574.1_RaGOO	1580000	45724411	0	1	0.0000	36	33	1.00	0.87	1.10
CM015574.1_RaGOO	1581000	45724411	0	0	0.0000	21	26	0.60	0.69	0.84
CM015574.1_RaGOO	1582000	45724411	0	0	0.0000	27	37	0.75	0.99	0.72
CM015574.1_RaGOO	1583000	45724411	0	1	0.0482	26	27	0.73	0.71	0.98
CM015574.1_RaGOO	1584000	45724411	0	1	0.1904	35	31	0.98	0.84	1.13
CM015574.1_RaGOO	1585000	45724411	0	0	0.0039	33	35	0.91	0.94	0.94
CM015574.1_RaGOO	1586000	45724411	0	1	0.0000	36	38	1.00	1.03	0.93
CM015574.1_RaGOO	1587000	45724411	0	0	0.0000	34	39	0.95	1.04	0.88
CM015574.1_RaGOO	1588000	45724411	0	0	0.0857	30	38	0.83	1.01	0.79
CM015574.1_RaGOO	1589000	45724411	0	0	0.0435	35	44	0.98	1.18	0.80
CM015574.1_RaGOO	1590000	45724411	0	0	0.0000	42	37	1.17	0.98	1.15
CM015574.1_RaGOO	1591000	45724411	0	0	0.0000	35	33	0.97	0.89	1.05
CM015574.1_RaGOO	1592000	45724411	0	0	0.0243	35	34	0.97	0.91	1.03
CM015574.1_RaGOO	1593000	45724411	0	0	0.0123	28	36	0.79	0.98	0.78
CM015574.1_RaGOO	1594000	45724411	0	0	0.0104	33	31	0.93	0.83	1.08
CM015574.1_RaGOO	1595000	45724411	0	1	0.1353	34	35	0.96	0.92	0.99
CM015574.1_RaGOO	1596000	45724411	0	0	0.0000	36	35	1.00	0.94	1.02
CM015574.1_RaGOO	1597000	45724411	0	0	0.0174	34	31	0.96	0.82	1.13
CM015574.1_RaGOO	1598000	45724411	0	0	0.0000	31	34	0.87	0.92	0.91
CM015574.1_RaGOO	1599000	45724411	0	0	0.0000	32	39	0.90	1.05	0.82
CM015574.1_RaGOO	1600000	45724411	0	0	0.1123	34	33	0.96	0.88	1.05
CM015574.1_RaGOO	1601000	45724411	0	0	0.0413	34	37	0.95	0.99	0.92
CM015574.1_RaGOO	1602000	45724411	0	1	0.0000	33	41	0.93	1.11	0.81
CM015574.1_RaGOO	1603000	45724411	0	0	0.0000	34	32	0.95	0.86	1.06
CM015574.1_RaGOO	1604000	45724411	0	0	0.0000	38	37	1.06	0.99	1.03
CM015574.1_RaGOO	1605000	45724411	0	0	0.0000	34	40	0.95	1.08	0.85
CM015574.1_RaGOO	1606000	45724411	0	0	0.0000	33	34	0.92	0.90	0.98
CM015574.1_RaGOO	1607000	45724411	0	0	0.0128	28	34	0.79	0.90	0.84
CM015574.1_RaGOO	1608000	45724411	0	0	0.0000	38	33	1.07	0.89	1.15
CM015574.1_RaGOO	1609000	45724411	0	0	0.0327	34	36	0.95	0.96	0.95
CM015574.1_RaGOO	1610000	45724411	0	0	0.0000	41	37	1.14	0.98	1.12
CM015574.1_RaGOO	1611000	45724411	0	0	0.0000	35	33	0.98	0.89	1.06
CM015574.1_RaGOO	1612000	45724411	0	0	0.0063	38	36	1.06	0.97	1.05
CM015574.1_RaGOO	1613000	45724411	0	0	0.0000	41	45	1.14	1.21	0.91
CM015574.1_RaGOO	1614000	45724411	0	0	0.0000	38	36	1.05	0.97	1.04
CM015574.1_RaGOO	1615000	45724411	0	0	0.0000	36	35	0.99	0.94	1.02
CM015574.1_RaGOO	1616000	45724411	0	0	0.0000	34	37	0.96	0.99	0.93
CM015574.1_RaGOO	1617000	45724411	0	0	0.0000	32	32	0.89	0.87	0.99
CM015574.1_RaGOO	1618000	45724411	0	0	0.0000	32	37	0.89	0.98	0.88
CM015574.1_RaGOO	1619000	45724411	0	0	0.0320	32	39	0.90	1.04	0.83
CM015574.1_RaGOO	1620000	45724411	0	0	0.0000	39	40	1.08	1.06	0.98
CM015574.1_RaGOO	1621000	45724411	0	0	0.0000	33	37	0.92	0.99	0.90
CM015574.1_RaGOO	1622000	45724411	0	1	0.0018	34	38	0.96	1.01	0.92
CM015574.1_RaGOO	1623000	45724411	0	0	0.0000	29	31	0.82	0.84	0.94
CM015574.1_RaGOO	1624000	45724411	0	0	0.0000	25	27	0.70	0.72	0.94
CM015574.1_RaGOO	1625000	45724411	0	0	0.0876	28	30	0.79	0.79	0.96
CM015574.1_RaGOO	1626000	45724411	0	0	0.0000	27	32	0.74	0.84	0.84
CM015574.1_RaGOO	1627000	45724411	0	0	0.0000	27	31	0.75	0.83	0.87
CM015574.1_RaGOO	1628000	45724411	0	0	0.0196	30	31	0.83	0.82	0.97
CM015574.1_RaGOO	1629000	45724411	0	0	0.0712	28	27	0.77	0.72	1.03
CM015574.1_RaGOO	1630000	45724411	0	2	0.0000	26	44	0.71	1.18	0.58
CM015574.1_RaGOO	1631000	45724411	0	0	0.0000	30	29	0.85	0.78	1.04
CM015574.1_RaGOO	1632000	45724411	0	0	0.0000	29	35	0.81	0.94	0.82
CM015574.1_RaGOO	1633000	45724411	0	0	0.0414	28	32	0.79	0.86	0.88
CM015574.1_RaGOO	1634000	45724411	0	1	0.0000	25	29	0.68	0.79	0.84
CM015574.1_RaGOO	1635000	45724411	0	2	0.0000	29	32	0.81	0.86	0.90
CM015574.1_RaGOO	1636000	45724411	0	0	0.0000	21	22	0.59	0.59	0.95
CM015574.1_RaGOO	1637000	45724411	0	0	0.0000	32	26	0.89	0.69	1.23
CM015574.1_RaGOO	1638000	45724411	0	0	0.0000	25	29	0.70	0.77	0.88
CM015574.1_RaGOO	1639000	45724411	0	0	0.0000	31	32	0.85	0.86	0.95
CM015574.1_RaGOO	1640000	45724411	0	0	0.0000	33	31	0.91	0.83	1.06
CM015574.1_RaGOO	1641000	45724411	0	0	0.0000	34	34	0.94	0.92	0.99
CM015574.1_RaGOO	1642000	45724411	0	0	0.0000	20	20	0.56	0.54	0.99
CM015574.1_RaGOO	1643000	45724411	0	0	0.0000	33	34	0.92	0.90	0.98
CM015574.1_RaGOO	1644000	45724411	0	0	0.0000	34	33	0.94	0.90	1.01
CM015574.1_RaGOO	1645000	45724411	0	0	0.0000	31	30	0.87	0.80	1.04
CM015574.1_RaGOO	1646000	45724411	0	1	0.0000	32	40	0.88	1.07	0.79
CM015574.1_RaGOO	1647000	45724411	0	0	0.0000	33	44	0.92	1.18	0.76
CM015574.1_RaGOO	1648000	45724411	0	0	0.0000	41	34	1.13	0.92	1.18
CM015574.1_RaGOO	1649000	45724411	0	0	0.1814	38	39	1.05	1.03	0.98
CM015574.1_RaGOO	1650000	45724411	0	1	0.0000	42	40	1.18	1.06	1.07
CM015574.1_RaGOO	1651000	45724411	0	0	0.0000	43	36	1.20	0.97	1.18
CM015574.1_RaGOO	1652000	45724411	0	0	0.0097	38	37	1.05	0.98	1.03
CM015574.1_RaGOO	1653000	45724411	0	0	0.0000	43	46	1.20	1.23	0.94
CM015574.1_RaGOO	1654000	45724411	0	0	0.0000	41	45	1.15	1.20	0.92
CM015574.1_RaGOO	1655000	45724411	0	0	0.0000	31	39	0.88	1.05	0.80
CM015574.1_RaGOO	1656000	45724411	0	0	0.1895	33	39	0.93	1.04	0.86
CM015574.1_RaGOO	1657000	45724411	0	0	0.0000	25	31	0.70	0.82	0.83
CM015574.1_RaGOO	1658000	45724411	0	0	0.0000	38	42	1.05	1.12	0.90
CM015574.1_RaGOO	1659000	45724411	0	0	0.0585	44	41	1.23	1.10	1.08
CM015574.1_RaGOO	1660000	45724411	0	1	0.0196	35	42	0.97	1.12	0.84
CM015574.1_RaGOO	1661000	45724411	0	0	0.0000	39	43	1.07	1.16	0.89
CM015574.1_RaGOO	1662000	45724411	0	0	0.0336	37	31	1.02	0.84	1.17
CM015574.1_RaGOO	1663000	45724411	0	0	0.0000	35	34	0.99	0.91	1.04
CM015574.1_RaGOO	1664000	45724411	0	0	0.0000	32	34	0.89	0.90	0.95
CM015574.1_RaGOO	1665000	45724411	0	0	0.0000	34	37	0.95	0.98	0.93
CM015574.1_RaGOO	1666000	45724411	0	0	0.0000	33	33	0.91	0.88	0.99
CM015574.1_RaGOO	1667000	45724411	0	0	0.0000	33	30	0.91	0.79	1.11
CM015574.1_RaGOO	1668000	45724411	0	0	0.0000	35	34	0.97	0.91	1.03
CM015574.1_RaGOO	1669000	45724411	0	0	0.0000	28	29	0.79	0.77	0.99
CM015574.1_RaGOO	1670000	45724411	0	0	0.0075	34	37	0.95	0.98	0.93
CM015574.1_RaGOO	1671000	45724411	0	0	0.0000	31	31	0.87	0.83	1.01
CM015574.1_RaGOO	1672000	45724411	0	0	0.0000	27	29	0.74	0.78	0.91
CM015574.1_RaGOO	1673000	45724411	0	0	0.0000	27	28	0.76	0.76	0.97
CM015574.1_RaGOO	1674000	45724411	0	0	0.0000	27	30	0.76	0.81	0.90
CM015574.1_RaGOO	1675000	45724411	0	0	0.0000	27	37	0.74	0.99	0.72
CM015574.1_RaGOO	1676000	45724411	0	0	0.0000	30	32	0.83	0.86	0.92
CM015574.1_RaGOO	1677000	45724411	0	0	0.0000	30	35	0.82	0.94	0.84
CM015574.1_RaGOO	1678000	45724411	0	0	0.0000	29	37	0.81	0.99	0.79
CM015574.1_RaGOO	1679000	45724411	0	0	0.0000	31	38	0.86	1.02	0.82
CM015574.1_RaGOO	1680000	45724411	0	0	0.0000	34	38	0.94	1.01	0.90
CM015574.1_RaGOO	1681000	45724411	0	0	0.0000	30	37	0.84	0.99	0.82
CM015574.1_RaGOO	1682000	45724411	0	0	0.0000	36	37	1.00	0.98	0.98
CM015574.1_RaGOO	1683000	45724411	0	0	0.0000	38	41	1.07	1.11	0.93
CM015574.1_RaGOO	1684000	45724411	0	0	0.0000	35	40	0.98	1.06	0.89
CM015574.1_RaGOO	1685000	45724411	0	0	0.0000	32	31	0.90	0.82	1.05
CM015574.1_RaGOO	1686000	45724411	0	0	0.0000	42	38	1.18	1.01	1.13
CM015574.1_RaGOO	1687000	45724411	0	0	0.0000	30	30	0.82	0.80	0.99
CM015574.1_RaGOO	1688000	45724411	0	0	0.0000	43	42	1.20	1.12	1.04
CM015574.1_RaGOO	1689000	45724411	0	0	0.0000	37	38	1.03	1.02	0.97
CM015574.1_RaGOO	1690000	45724411	0	0	0.0000	40	35	1.12	0.95	1.13
CM015574.1_RaGOO	1691000	45724411	0	0	0.0000	33	37	0.92	0.98	0.90
CM015574.1_RaGOO	1692000	45724411	0	0	0.0083	36	39	1.01	1.04	0.93
CM015574.1_RaGOO	1693000	45724411	0	0	0.0000	35	37	0.99	0.99	0.96
CM015574.1_RaGOO	1694000	45724411	0	0	0.0000	34	47	0.95	1.25	0.73
CM015574.1_RaGOO	1695000	45724411	0	0	0.0000	45	46	1.24	1.23	0.97
CM015574.1_RaGOO	1696000	45724411	0	0	0.0000	33	38	0.92	1.01	0.88
CM015574.1_RaGOO	1697000	45724411	0	0	0.0000	27	31	0.76	0.84	0.87
CM015574.1_RaGOO	1698000	45724411	0	0	0.0000	36	37	1.01	0.98	0.99
CM015574.1_RaGOO	1699000	45724411	0	0	0.0107	34	33	0.93	0.88	1.02
CM015574.1_RaGOO	1700000	45724411	1	0	0.0000	26	29	0.72	0.77	0.90
CM015574.1_RaGOO	1701000	45724411	0	0	0.0000	25	33	0.70	0.89	0.76
CM015574.1_RaGOO	1702000	45724411	0	0	0.0124	33	32	0.91	0.86	1.03
CM015574.1_RaGOO	1703000	45724411	0	0	0.0115	26	32	0.74	0.86	0.82
CM015574.1_RaGOO	1704000	45724411	0	0	0.0000	28	33	0.77	0.87	0.85
CM015574.1_RaGOO	1705000	45724411	0	0	0.0000	33	31	0.91	0.82	1.06
CM015574.1_RaGOO	1706000	45724411	0	0	0.0000	26	32	0.71	0.86	0.80
CM015574.1_RaGOO	1707000	45724411	0	0	0.0000	24	30	0.66	0.80	0.79
CM015574.1_RaGOO	1708000	45724411	0	0	0.0000	30	31	0.83	0.84	0.94
CM015574.1_RaGOO	1709000	45724411	0	0	0.0000	27	29	0.75	0.79	0.92
CM015574.1_RaGOO	1710000	45724411	0	0	0.0000	29	28	0.80	0.75	1.03
CM015574.1_RaGOO	1711000	45724411	0	0	0.0000	33	38	0.92	1.01	0.88
CM015574.1_RaGOO	1712000	45724411	0	0	0.0000	31	43	0.86	1.15	0.72
CM015574.1_RaGOO	1713000	45724411	0	0	0.0000	37	44	1.04	1.19	0.84
CM015574.1_RaGOO	1714000	45724411	0	0	0.0000	35	38	0.98	1.02	0.92
CM015574.1_RaGOO	1715000	45724411	0	0	0.0000	39	36	1.08	0.96	1.08
CM015574.1_RaGOO	1716000	45724411	0	0	0.0000	35	35	0.98	0.93	1.01
CM015574.1_RaGOO	1717000	45724411	0	0	0.0021	31	32	0.87	0.86	0.97
CM015574.1_RaGOO	1718000	45724411	0	0	0.0317	30	37	0.82	0.98	0.81
CM015574.1_RaGOO	1719000	45724411	0	0	0.0000	30	30	0.82	0.80	0.99
CM015574.1_RaGOO	1720000	45724411	0	0	0.0000	29	30	0.81	0.82	0.95
CM015574.1_RaGOO	1721000	45724411	0	0	0.0000	33	33	0.91	0.90	0.98
CM015574.1_RaGOO	1722000	45724411	0	0	0.0000	33	36	0.92	0.97	0.91
CM015574.1_RaGOO	1723000	45724411	0	0	0.0000	32	35	0.89	0.93	0.91
CM015574.1_RaGOO	1724000	45724411	0	0	0.0076	34	29	0.94	0.77	1.17
CM015574.1_RaGOO	1725000	45724411	0	0	0.0000	35	37	0.97	0.99	0.94
CM015574.1_RaGOO	1726000	45724411	3	0	0.0435	24	29	0.66	0.78	0.82
CM015574.1_RaGOO	1727000	45724411	1	0	0.0075	24	26	0.68	0.70	0.94
CM015574.1_RaGOO	1728000	45724411	0	0	0.0000	34	37	0.94	0.98	0.92
CM015574.1_RaGOO	1729000	45724411	0	0	0.0000	39	46	1.08	1.24	0.84
CM015574.1_RaGOO	1730000	45724411	0	0	0.0064	40	32	1.10	0.86	1.23
CM015574.1_RaGOO	1731000	45724411	0	0	0.0000	34	30	0.94	0.80	1.13
CM015574.1_RaGOO	1732000	45724411	0	0	0.0000	26	37	0.72	0.98	0.70
CM015574.1_RaGOO	1733000	45724411	0	0	0.0000	30	29	0.84	0.78	1.04
CM015574.1_RaGOO	1734000	45724411	0	0	0.0000	34	38	0.95	1.03	0.89
CM015574.1_RaGOO	1735000	45724411	0	0	0.0000	34	38	0.94	1.01	0.89
CM015574.1_RaGOO	1736000	45724411	0	0	0.0000	39	41	1.10	1.09	0.96
CM015574.1_RaGOO	1737000	45724411	0	0	0.0194	37	39	1.04	1.04	0.97
CM015574.1_RaGOO	1738000	45724411	0	0	0.0000	35	40	0.98	1.08	0.87
CM015574.1_RaGOO	1739000	45724411	0	0	0.0000	36	40	1.01	1.08	0.90
CM015574.1_RaGOO	1740000	45724411	0	0	0.0000	40	37	1.10	0.98	1.08
CM015574.1_RaGOO	1741000	45724411	0	0	0.0000	33	39	0.93	1.05	0.86
CM015574.1_RaGOO	1742000	45724411	0	0	0.0591	34	35	0.94	0.94	0.96
CM015574.1_RaGOO	1743000	45724411	0	0	0.0000	34	32	0.96	0.86	1.06
CM015574.1_RaGOO	1744000	45724411	0	0	0.0000	33	25	0.93	0.68	1.32
CM015574.1_RaGOO	1745000	45724411	0	0	0.0000	32	33	0.88	0.89	0.95
CM015574.1_RaGOO	1746000	45724411	0	0	0.0000	33	35	0.91	0.92	0.95
CM015574.1_RaGOO	1747000	45724411	0	0	0.0000	29	25	0.81	0.68	1.15
CM015574.1_RaGOO	1748000	45724411	0	0	0.0000	31	29	0.86	0.78	1.07
CM015574.1_RaGOO	1749000	45724411	0	0	0.0000	34	31	0.95	0.83	1.09
CM015574.1_RaGOO	1750000	45724411	0	0	0.0000	35	31	0.97	0.84	1.11
CM015574.1_RaGOO	1751000	45724411	0	0	0.0000	33	33	0.91	0.90	0.97
CM015574.1_RaGOO	1752000	45724411	0	0	0.0000	39	35	1.08	0.93	1.11
CM015574.1_RaGOO	1753000	45724411	0	0	0.0000	34	35	0.93	0.94	0.95
CM015574.1_RaGOO	1754000	45724411	0	0	0.0000	39	45	1.08	1.20	0.86
CM015574.1_RaGOO	1755000	45724411	0	0	0.0000	38	41	1.05	1.10	0.92
CM015574.1_RaGOO	1756000	45724411	0	0	0.0000	5	6	0.15	0.17	0.83
CM015574.1_RaGOO	1757000	45724411	0	0	0.0047	43	41	1.20	1.09	1.06
CM015574.1_RaGOO	1758000	45724411	0	0	0.0000	38	38	1.05	1.02	1.00
CM015574.1_RaGOO	1759000	45724411	0	0	0.0000	35	34	0.96	0.92	1.00
CM015574.1_RaGOO	1760000	45724411	0	0	0.0066	34	34	0.95	0.91	1.01
CM015574.1_RaGOO	1761000	45724411	0	0	0.0000	41	39	1.15	1.04	1.07
CM015574.1_RaGOO	1762000	45724411	0	0	0.0000	35	36	0.98	0.97	0.98
CM015574.1_RaGOO	1763000	45724411	0	0	0.0000	35	34	0.98	0.92	1.02
CM015574.1_RaGOO	1764000	45724411	0	0	0.0000	32	37	0.89	1.00	0.86
CM015574.1_RaGOO	1765000	45724411	0	0	0.0000	36	34	1.00	0.91	1.05
CM015574.1_RaGOO	1766000	45724411	0	0	0.0000	38	39	1.06	1.05	0.98
CM015574.1_RaGOO	1767000	45724411	0	0	0.0000	6	5	0.17	0.13	1.27
CM015574.1_RaGOO	1768000	45724411	0	0	0.0743	33	37	0.91	0.98	0.89
CM015574.1_RaGOO	1769000	45724411	0	0	0.0110	39	41	1.08	1.10	0.95
CM015574.1_RaGOO	1770000	45724411	0	0	0.0000	41	38	1.16	1.01	1.10
CM015574.1_RaGOO	1771000	45724411	0	0	0.0000	37	40	1.03	1.08	0.91
CM015574.1_RaGOO	1772000	45724411	0	0	0.0063	39	41	1.09	1.11	0.94
CM015574.1_RaGOO	1773000	45724411	0	0	0.0000	40	44	1.12	1.17	0.92
CM015574.1_RaGOO	1774000	45724411	0	0	0.0000	34	40	0.94	1.08	0.84
CM015574.1_RaGOO	1775000	45724411	0	0	0.0000	36	35	1.00	0.94	1.02
CM015574.1_RaGOO	1776000	45724411	0	0	0.0000	30	32	0.83	0.86	0.93
CM015574.1_RaGOO	1777000	45724411	0	0	0.0000	36	34	0.99	0.91	1.05
CM015574.1_RaGOO	1778000	45724411	0	0	0.0106	33	29	0.91	0.77	1.14
CM015574.1_RaGOO	1779000	45724411	0	0	0.0000	30	35	0.84	0.92	0.88
CM015574.1_RaGOO	1780000	45724411	0	0	0.0000	41	32	1.13	0.86	1.27
CM015574.1_RaGOO	1781000	45724411	0	0	0.0009	26	34	0.74	0.91	0.78
CM015574.1_RaGOO	1782000	45724411	0	0	0.0000	36	34	1.00	0.90	1.06
CM015574.1_RaGOO	1783000	45724411	0	0	0.0000	32	41	0.90	1.09	0.79
CM015574.1_RaGOO	1784000	45724411	0	0	0.0000	39	33	1.09	0.88	1.19
CM015574.1_RaGOO	1785000	45724411	0	0	0.0000	39	37	1.08	0.98	1.06
CM015574.1_RaGOO	1786000	45724411	0	0	0.0000	39	41	1.10	1.11	0.95
CM015574.1_RaGOO	1787000	45724411	0	0	0.0000	35	39	0.97	1.05	0.89
CM015574.1_RaGOO	1788000	45724411	1	0	0.0000	33	36	0.92	0.96	0.92
CM015574.1_RaGOO	1789000	45724411	0	0	0.0000	39	44	1.10	1.18	0.89
CM015574.1_RaGOO	1790000	45724411	0	1	0.0000	37	29	1.03	0.77	1.28
CM015574.1_RaGOO	1791000	45724411	0	0	0.0000	36	36	1.00	0.97	0.99
CM015574.1_RaGOO	1792000	45724411	0	0	0.0000	34	37	0.95	0.99	0.92
CM015574.1_RaGOO	1793000	45724411	0	0	0.0000	32	36	0.90	0.97	0.90
CM015574.1_RaGOO	1794000	45724411	0	0	0.0000	34	34	0.96	0.90	1.02
CM015574.1_RaGOO	1795000	45724411	0	0	0.0000	38	33	1.07	0.90	1.15
CM015574.1_RaGOO	1796000	45724411	0	0	0.0000	36	46	1.01	1.22	0.80
CM015574.1_RaGOO	1797000	45724411	0	0	0.0089	41	37	1.13	0.98	1.11
CM015574.1_RaGOO	1798000	45724411	0	0	0.0250	35	40	0.97	1.06	0.88
CM015574.1_RaGOO	1799000	45724411	0	0	0.0000	38	42	1.06	1.13	0.90
CM015574.1_RaGOO	1800000	45724411	0	0	0.0357	29	34	0.82	0.92	0.85
CM015574.1_RaGOO	1801000	45724411	0	0	0.0898	30	29	0.82	0.78	1.01
CM015574.1_RaGOO	1802000	45724411	0	0	0.0049	36	36	0.99	0.97	0.99
CM015574.1_RaGOO	1803000	45724411	0	0	0.0800	35	28	0.99	0.76	1.25
CM015574.1_RaGOO	1804000	45724411	0	0	0.0005	33	31	0.91	0.84	1.05
CM015574.1_RaGOO	1805000	45724411	0	0	0.0188	36	33	0.99	0.88	1.09
CM015574.1_RaGOO	1806000	45724411	0	0	0.0000	37	30	1.04	0.80	1.25
CM015574.1_RaGOO	1807000	45724411	0	0	0.0000	36	34	1.01	0.90	1.07
CM015574.1_RaGOO	1808000	45724411	0	0	0.0000	32	35	0.89	0.93	0.92
CM015574.1_RaGOO	1809000	45724411	0	0	0.0000	30	33	0.83	0.89	0.90
CM015574.1_RaGOO	1810000	45724411	0	0	0.0000	30	35	0.85	0.95	0.86
CM015574.1_RaGOO	1811000	45724411	0	0	0.0106	33	35	0.93	0.92	0.96
CM015574.1_RaGOO	1812000	45724411	0	0	0.0000	31	32	0.86	0.87	0.95
CM015574.1_RaGOO	1813000	45724411	0	0	0.0163	41	43	1.14	1.14	0.97
CM015574.1_RaGOO	1814000	45724411	0	0	0.0000	38	33	1.05	0.88	1.15
CM015574.1_RaGOO	1815000	45724411	0	0	0.0167	29	27	0.81	0.74	1.06
CM015574.1_RaGOO	1816000	45724411	0	0	0.1005	37	39	1.03	1.06	0.94
CM015574.1_RaGOO	1817000	45724411	0	0	0.0000	43	44	1.19	1.18	0.96
CM015574.1_RaGOO	1818000	45724411	0	0	0.0000	37	43	1.04	1.16	0.86
CM015574.1_RaGOO	1819000	45724411	0	0	0.0000	46	48	1.28	1.29	0.96
CM015574.1_RaGOO	1820000	45724411	0	0	0.0129	42	34	1.18	0.91	1.25
CM015574.1_RaGOO	1821000	45724411	0	0	0.0000	35	37	0.96	0.99	0.93
CM015574.1_RaGOO	1822000	45724411	0	0	0.0000	36	33	0.99	0.88	1.08
CM015574.1_RaGOO	1823000	45724411	0	0	0.0000	39	41	1.10	1.10	0.96
CM015574.1_RaGOO	1824000	45724411	0	0	0.0000	43	41	1.20	1.09	1.05
CM015574.1_RaGOO	1825000	45724411	0	0	0.0000	37	32	1.02	0.86	1.15
CM015574.1_RaGOO	1826000	45724411	0	0	0.0000	40	46	1.12	1.24	0.87
CM015574.1_RaGOO	1827000	45724411	0	0	0.0000	37	36	1.04	0.97	1.04
CM015574.1_RaGOO	1828000	45724411	0	0	0.0000	41	43	1.16	1.14	0.97
CM015574.1_RaGOO	1829000	45724411	0	0	0.0000	43	44	1.19	1.19	0.97
CM015574.1_RaGOO	1830000	45724411	0	0	0.0000	38	44	1.06	1.17	0.87
CM015574.1_RaGOO	1831000	45724411	0	0	0.0000	42	38	1.18	1.01	1.11
CM015574.1_RaGOO	1832000	45724411	0	0	0.0000	48	36	1.33	0.97	1.32
CM015574.1_RaGOO	1833000	45724411	0	0	0.0000	40	35	1.10	0.93	1.14
CM015574.1_RaGOO	1834000	45724411	0	0	0.0000	51	45	1.43	1.22	1.13
CM015574.1_RaGOO	1835000	45724411	0	0	0.0000	37	39	1.04	1.03	0.96
CM015574.1_RaGOO	1836000	45724411	0	0	0.0000	41	38	1.13	1.02	1.07
CM015574.1_RaGOO	1837000	45724411	0	0	0.0088	43	42	1.19	1.13	1.01
CM015574.1_RaGOO	1838000	45724411	0	0	0.0000	40	37	1.12	0.98	1.10
CM015574.1_RaGOO	1839000	45724411	1	0	0.0000	20	25	0.56	0.68	0.79
CM015574.1_RaGOO	1840000	45724411	0	0	0.0000	36	40	1.00	1.06	0.91
CM015574.1_RaGOO	1841000	45724411	0	0	0.0000	44	34	1.23	0.90	1.32
CM015574.1_RaGOO	1842000	45724411	0	0	0.0000	44	39	1.21	1.05	1.11
CM015574.1_RaGOO	1843000	45724411	0	0	0.0000	45	40	1.25	1.07	1.13
CM015574.1_RaGOO	1844000	45724411	0	0	0.0000	44	39	1.21	1.04	1.13
CM015574.1_RaGOO	1845000	45724411	0	0	0.0000	34	45	0.94	1.20	0.75
CM015574.1_RaGOO	1846000	45724411	0	0	0.0000	32	36	0.88	0.97	0.88
CM015574.1_RaGOO	1847000	45724411	0	0	0.0000	37	35	1.02	0.93	1.05
CM015574.1_RaGOO	1848000	45724411	0	0	0.0000	35	36	0.98	0.96	0.98
CM015574.1_RaGOO	1849000	45724411	0	0	0.0000	34	35	0.94	0.94	0.96
CM015574.1_RaGOO	1850000	45724411	0	0	0.0000	37	38	1.04	1.02	0.98
CM015574.1_RaGOO	1851000	45724411	0	0	0.0000	38	37	1.06	0.98	1.04
CM015574.1_RaGOO	1852000	45724411	0	0	0.0000	37	39	1.02	1.05	0.93
CM015574.1_RaGOO	1853000	45724411	0	0	0.0000	33	37	0.93	1.00	0.89
CM015574.1_RaGOO	1854000	45724411	0	0	0.0000	39	41	1.10	1.09	0.96
CM015574.1_RaGOO	1855000	45724411	0	0	0.0000	45	40	1.26	1.07	1.13
CM015574.1_RaGOO	1856000	45724411	0	0	0.0000	48	44	1.34	1.19	1.08
CM015574.1_RaGOO	1857000	45724411	0	0	0.0000	42	53	1.18	1.42	0.80
CM015574.1_RaGOO	1858000	45724411	0	0	0.0000	33	45	0.93	1.19	0.75
CM015574.1_RaGOO	1859000	45724411	0	0	0.0000	41	46	1.15	1.22	0.90
CM015574.1_RaGOO	1860000	45724411	0	0	0.0000	31	42	0.87	1.14	0.73
CM015574.1_RaGOO	1861000	45724411	0	0	0.0000	41	41	1.13	1.11	0.98
CM015574.1_RaGOO	1862000	45724411	0	0	0.0000	42	44	1.16	1.18	0.95
CM015574.1_RaGOO	1863000	45724411	0	0	0.0224	37	33	1.03	0.88	1.13
CM015574.1_RaGOO	1864000	45724411	0	0	0.0000	37	39	1.02	1.06	0.93
CM015574.1_RaGOO	1865000	45724411	0	0	0.0000	38	39	1.05	1.05	0.96
CM015574.1_RaGOO	1866000	45724411	0	0	0.0000	35	38	0.97	1.02	0.91
CM015574.1_RaGOO	1867000	45724411	0	0	0.0000	33	36	0.92	0.96	0.92
CM015574.1_RaGOO	1868000	45724411	0	0	0.0000	31	31	0.87	0.82	1.02
CM015574.1_RaGOO	1869000	45724411	0	0	0.0145	34	35	0.94	0.94	0.96
CM015574.1_RaGOO	1870000	45724411	0	0	0.0355	31	31	0.86	0.84	0.99
CM015574.1_RaGOO	1871000	45724411	0	0	0.0000	34	32	0.94	0.87	1.04
CM015574.1_RaGOO	1872000	45724411	0	0	0.0000	32	37	0.89	0.99	0.86
CM015574.1_RaGOO	1873000	45724411	0	0	0.0000	36	34	0.99	0.90	1.06
CM015574.1_RaGOO	1874000	45724411	0	0	0.0000	34	38	0.95	1.01	0.90
CM015574.1_RaGOO	1875000	45724411	0	0	0.0000	44	43	1.23	1.15	1.03
CM015574.1_RaGOO	1876000	45724411	0	0	0.0000	36	42	0.99	1.13	0.84
CM015574.1_RaGOO	1877000	45724411	0	0	0.0000	34	38	0.95	1.02	0.90
CM015574.1_RaGOO	1878000	45724411	0	0	0.0000	39	37	1.09	0.98	1.07
CM015574.1_RaGOO	1879000	45724411	0	0	0.0000	36	40	1.00	1.08	0.89
CM015574.1_RaGOO	1880000	45724411	0	0	0.0000	36	41	1.01	1.11	0.88
CM015574.1_RaGOO	1881000	45724411	0	0	0.0000	41	40	1.13	1.07	1.02
CM015574.1_RaGOO	1882000	45724411	0	0	0.0000	33	36	0.93	0.97	0.92
CM015574.1_RaGOO	1883000	45724411	0	0	0.0000	44	35	1.21	0.93	1.26
CM015574.1_RaGOO	1884000	45724411	0	0	0.0000	44	44	1.22	1.19	0.99
CM015574.1_RaGOO	1885000	45724411	0	0	0.0000	45	37	1.27	0.99	1.23
CM015574.1_RaGOO	1886000	45724411	0	0	0.0000	44	44	1.22	1.18	0.99
CM015574.1_RaGOO	1887000	45724411	0	0	0.0000	31	30	0.85	0.82	1.00
CM015574.1_RaGOO	1888000	45724411	0	0	0.0000	33	39	0.93	1.03	0.86
CM015574.1_RaGOO	1889000	45724411	0	0	0.0000	31	32	0.86	0.85	0.98
CM015574.1_RaGOO	1890000	45724411	0	0	0.0000	38	40	1.05	1.08	0.94
CM015574.1_RaGOO	1891000	45724411	0	0	0.0000	42	46	1.16	1.24	0.90
CM015574.1_RaGOO	1892000	45724411	0	0	0.0000	44	48	1.22	1.29	0.91
CM015574.1_RaGOO	1893000	45724411	0	0	0.0000	44	38	1.22	1.02	1.15
CM015574.1_RaGOO	1894000	45724411	0	0	0.0000	39	44	1.09	1.18	0.89
CM015574.1_RaGOO	1895000	45724411	0	0	0.0000	34	39	0.96	1.05	0.88
CM015574.1_RaGOO	1896000	45724411	0	0	0.0000	50	45	1.39	1.20	1.11
CM015574.1_RaGOO	1897000	45724411	0	0	0.0000	42	36	1.16	0.98	1.14
CM015574.1_RaGOO	1898000	45724411	0	0	0.0000	39	33	1.09	0.89	1.18
CM015574.1_RaGOO	1899000	45724411	0	0	0.0000	36	35	1.00	0.94	1.02
CM015574.1_RaGOO	1900000	45724411	0	0	0.0000	43	41	1.20	1.10	1.05
CM015574.1_RaGOO	1901000	45724411	0	0	0.0000	39	39	1.10	1.05	1.00
CM015574.1_RaGOO	1902000	45724411	0	0	0.0000	34	41	0.95	1.10	0.83
CM015574.1_RaGOO	1903000	45724411	0	0	0.0000	38	41	1.07	1.10	0.94
CM015574.1_RaGOO	1904000	45724411	0	0	0.0000	36	39	1.01	1.05	0.92
CM015574.1_RaGOO	1905000	45724411	0	0	0.0000	35	41	0.97	1.11	0.84
CM015574.1_RaGOO	1906000	45724411	0	0	0.0000	34	37	0.94	0.99	0.91
CM015574.1_RaGOO	1907000	45724411	1	0	0.0163	43	41	1.18	1.09	1.04
CM015574.1_RaGOO	1908000	45724411	0	0	0.0000	46	44	1.28	1.18	1.04
CM015574.1_RaGOO	1909000	45724411	0	0	0.0000	37	37	1.04	0.98	1.02
CM015574.1_RaGOO	1910000	45724411	0	0	0.0000	41	38	1.15	1.00	1.10
CM015574.1_RaGOO	1911000	45724411	0	0	0.0000	42	40	1.16	1.08	1.04
CM015574.1_RaGOO	1912000	45724411	0	0	0.0000	37	40	1.02	1.07	0.91
CM015574.1_RaGOO	1913000	45724411	0	0	0.0000	38	44	1.05	1.18	0.85
CM015574.1_RaGOO	1914000	45724411	0	0	0.0000	1	1	0.03	0.03	1.08
CM015574.1_RaGOO	1915000	45724411	0	0	0.0000	0	0	0.00	0.00	0.86
CM015574.1_RaGOO	1916000	45724411	0	0	0.0000	51	61	1.42	1.63	0.84
CM015574.1_RaGOO	1917000	45724411	0	0	0.0000	6	6	0.17	0.17	0.96
CM015574.1_RaGOO	1918000	45724411	0	0	0.0000	3	3	0.10	0.07	1.25
CM015574.1_RaGOO	1919000	45724411	0	0	0.0000	21	19	0.59	0.51	1.11
CM015574.1_RaGOO	1920000	45724411	0	0	0.0000	16	17	0.45	0.46	0.94
CM015574.1_RaGOO	1921000	45724411	0	0	0.0000	1	1	0.03	0.04	0.91
CM015574.1_RaGOO	1922000	45724411	0	0	0.0079	13	11	0.37	0.29	1.24
CM015574.1_RaGOO	1923000	45724411	0	0	0.0000	43	41	1.19	1.09	1.05
CM015574.1_RaGOO	1924000	45724411	0	0	0.0000	42	36	1.16	0.97	1.15
CM015574.1_RaGOO	1925000	45724411	0	0	0.0000	45	43	1.26	1.14	1.05
CM015574.1_RaGOO	1926000	45724411	0	0	0.0111	40	44	1.10	1.18	0.90
CM015574.1_RaGOO	1927000	45724411	0	0	0.0000	34	38	0.94	1.03	0.88
CM015574.1_RaGOO	1928000	45724411	0	0	0.0000	44	44	1.21	1.18	0.99
CM015574.1_RaGOO	1929000	45724411	0	0	0.0000	41	41	1.13	1.10	0.99
CM015574.1_RaGOO	1930000	45724411	0	1	0.0000	36	30	1.00	0.81	1.19
CM015574.1_RaGOO	1931000	45724411	0	0	0.0000	44	40	1.23	1.06	1.12
CM015574.1_RaGOO	1932000	45724411	0	0	0.0000	46	43	1.29	1.16	1.07
CM015574.1_RaGOO	1933000	45724411	0	0	0.0000	44	38	1.23	1.02	1.16
CM015574.1_RaGOO	1934000	45724411	0	0	0.0000	35	33	0.97	0.87	1.07
CM015574.1_RaGOO	1935000	45724411	0	0	0.0000	39	37	1.10	0.99	1.06
CM015574.1_RaGOO	1936000	45724411	0	0	0.0000	38	37	1.06	1.00	1.01
CM015574.1_RaGOO	1937000	45724411	0	0	0.0000	37	39	1.03	1.05	0.95
CM015574.1_RaGOO	1938000	45724411	0	0	0.0071	30	37	0.83	1.00	0.80
CM015574.1_RaGOO	1939000	45724411	0	0	0.0000	35	46	0.97	1.23	0.76
CM015574.1_RaGOO	1940000	45724411	0	1	0.0000	28	26	0.77	0.69	1.08
CM015574.1_RaGOO	1941000	45724411	0	0	0.0000	43	38	1.19	1.02	1.12
CM015574.1_RaGOO	1942000	45724411	0	0	0.0000	40	40	1.10	1.07	0.99
CM015574.1_RaGOO	1943000	45724411	0	0	0.0000	44	46	1.22	1.22	0.96
CM015574.1_RaGOO	1944000	45724411	0	0	0.0000	42	48	1.17	1.29	0.87
CM015574.1_RaGOO	1945000	45724411	0	0	0.0000	38	41	1.06	1.09	0.93
CM015574.1_RaGOO	1946000	45724411	0	0	0.0000	37	30	1.04	0.81	1.24
CM015574.1_RaGOO	1947000	45724411	0	0	0.0000	33	34	0.92	0.91	0.97
CM015574.1_RaGOO	1948000	45724411	0	0	0.0000	30	32	0.84	0.86	0.94
CM015574.1_RaGOO	1949000	45724411	0	0	0.0000	28	37	0.79	0.98	0.78
CM015574.1_RaGOO	1950000	45724411	0	0	0.0000	33	36	0.92	0.96	0.93
CM015574.1_RaGOO	1951000	45724411	0	0	0.0000	33	33	0.93	0.89	1.00
CM015574.1_RaGOO	1952000	45724411	0	0	0.0000	26	37	0.73	0.98	0.71
CM015574.1_RaGOO	1953000	45724411	0	0	0.0000	27	35	0.75	0.93	0.77
CM015574.1_RaGOO	1954000	45724411	0	0	0.0000	24	29	0.68	0.77	0.85
CM015574.1_RaGOO	1955000	45724411	0	0	0.0000	27	31	0.74	0.82	0.86
CM015574.1_RaGOO	1956000	45724411	0	0	0.0000	28	24	0.78	0.65	1.15
CM015574.1_RaGOO	1957000	45724411	0	0	0.0000	59	58	1.64	1.57	1.00
CM015574.1_RaGOO	1958000	45724411	0	0	0.0000	14	14	0.38	0.37	0.99
CM015574.1_RaGOO	1959000	45724411	0	0	0.0000	6	6	0.17	0.16	1.00
CM015574.1_RaGOO	1960000	45724411	0	0	0.0000	29	30	0.82	0.80	0.98
CM015574.1_RaGOO	1961000	45724411	0	0	0.0000	22	18	0.60	0.47	1.22
CM015574.1_RaGOO	1962000	45724411	0	0	0.0000	27	26	0.74	0.70	1.02
CM015574.1_RaGOO	1963000	45724411	0	0	0.0000	30	34	0.84	0.90	0.90
CM015574.1_RaGOO	1964000	45724411	0	0	0.0000	28	39	0.78	1.05	0.72
CM015574.1_RaGOO	1965000	45724411	0	0	0.0000	29	36	0.82	0.98	0.81
CM015574.1_RaGOO	1966000	45724411	0	0	0.0000	32	35	0.89	0.93	0.91
CM015574.1_RaGOO	1967000	45724411	0	0	0.0000	24	24	0.67	0.64	1.01
CM015574.1_RaGOO	1968000	45724411	0	1	0.0359	26	27	0.73	0.73	0.96
CM015574.1_RaGOO	1969000	45724411	0	0	0.0000	34	38	0.94	1.03	0.88
CM015574.1_RaGOO	1970000	45724411	0	0	0.0000	28	31	0.79	0.83	0.92
CM015574.1_RaGOO	1971000	45724411	0	0	0.0174	25	29	0.69	0.77	0.86
CM015574.1_RaGOO	1972000	45724411	0	0	0.0000	25	27	0.71	0.73	0.94
CM015574.1_RaGOO	1973000	45724411	0	0	0.0000	31	29	0.86	0.77	1.07
CM015574.1_RaGOO	1974000	45724411	0	0	0.0000	32	31	0.90	0.82	1.06
CM015574.1_RaGOO	1975000	45724411	0	0	0.0000	35	30	0.97	0.81	1.15
CM015574.1_RaGOO	1976000	45724411	0	0	0.0000	27	31	0.76	0.84	0.87
CM015574.1_RaGOO	1977000	45724411	0	0	0.0000	29	32	0.81	0.85	0.91
CM015574.1_RaGOO	1978000	45724411	0	0	0.0000	33	38	0.91	1.02	0.86
CM015574.1_RaGOO	1979000	45724411	0	0	0.0000	31	32	0.87	0.85	0.98
CM015574.1_RaGOO	1980000	45724411	0	0	0.0000	33	31	0.93	0.82	1.09
CM015574.1_RaGOO	1981000	45724411	0	0	0.0000	42	39	1.16	1.03	1.07
CM015574.1_RaGOO	1982000	45724411	0	0	0.0000	27	31	0.76	0.83	0.87
CM015574.1_RaGOO	1983000	45724411	0	0	0.0039	35	38	0.98	1.02	0.92
CM015574.1_RaGOO	1984000	45724411	0	0	0.0000	31	40	0.87	1.06	0.79
CM015574.1_RaGOO	1985000	45724411	0	0	0.0000	37	39	1.03	1.04	0.95
CM015574.1_RaGOO	1986000	45724411	0	0	0.0000	32	30	0.88	0.81	1.05
CM015574.1_RaGOO	1987000	45724411	0	0	0.0000	26	33	0.73	0.90	0.78
CM015574.1_RaGOO	1988000	45724411	0	0	0.0000	37	32	1.02	0.87	1.13
CM015574.1_RaGOO	1989000	45724411	0	0	0.0000	37	38	1.03	1.01	0.97
CM015574.1_RaGOO	1990000	45724411	0	0	0.0000	32	33	0.90	0.88	0.98
CM015574.1_RaGOO	1991000	45724411	0	0	0.0000	30	37	0.83	0.98	0.81
CM015574.1_RaGOO	1992000	45724411	0	0	0.0000	35	35	0.97	0.94	0.99
CM015574.1_RaGOO	1993000	45724411	0	0	0.0000	36	33	1.00	0.89	1.08
CM015574.1_RaGOO	1994000	45724411	0	0	0.0000	39	42	1.08	1.13	0.92
CM015574.1_RaGOO	1995000	45724411	0	0	0.0000	42	40	1.18	1.07	1.06
CM015574.1_RaGOO	1996000	45724411	0	0	0.0000	40	35	1.10	0.92	1.15
CM015574.1_RaGOO	1997000	45724411	0	0	0.0000	31	35	0.87	0.95	0.88
CM015574.1_RaGOO	1998000	45724411	0	0	0.0000	36	40	1.00	1.07	0.89
[truncated: 955,642 more rows]
