# Supplementary material for: The rise and fall of the ancient northern pike master sex-determining gene
Source: eLife. 2021 Jan 28;10:e62858. doi: 10.7554/eLife.62858 (PMC7870143; doi:10.7554/eLife.62858)
Supplement: Figure 4—source data 5. [file elife-62858-fig4-data5.csv]

CM015574.1_RaGOO	Chr01
CM015575.1_RaGOO	Chr02
CM015576.1_RaGOO	Chr03
CM015577.1_RaGOO	Chr04
CM015578.1_RaGOO	Chr05
CM015579.1_RaGOO	Chr06
CM015580.1_RaGOO	Chr07
CM015581.1_RaGOO	Chr08
CM015582.1_RaGOO	Chr09
CM015583.1_RaGOO	Chr10
CM015584.1_RaGOO	Chr11
CM015585.1_RaGOO	Chr12
CM015586.1_RaGOO	Chr13
CM015587.1_RaGOO	Chr14
CM015588.1_RaGOO	Chr15
CM015589.1_RaGOO	Chr16
CM015590.1_RaGOO	Chr17
CM015591.1_RaGOO	Chr18
CM015592.1_RaGOO	Chr19
CM015593.1_RaGOO	Chr20
CM015594.1_RaGOO	Chr21
CM015595.1_RaGOO	Chr22
CM015596.1_RaGOO	Chr23
CM015597.1_RaGOO	Chr24
CM015598.1_RaGOO	Chr25
