# Supplementary material for: The rise and fall of the ancient northern pike master sex-determining gene
Source: eLife. 2021 Jan 28;10:e62858. doi: 10.7554/eLife.62858 (PMC7870143; doi:10.7554/eLife.62858)
Supplement: Source data 2. [file elife-62858-data2.csv]

Males	Females	Markers	P	Signif
0	1	2232	1	False
0	2	264	0.472021	False
0	3	44	0.236137	False
0	4	14	0.120507	False
0	5	2	0.0617067	False
0	6	0	0.0314243	False
0	7	0	0.015826	False
0	8	0	0.00785031	False
0	9	0	0.00382303	False
0	10	0	0.00182274	False
0	11	0	0.000848636	False
0	12	0	0.000384888	False
0	13	0	0.000169629	False
0	14	0	7.24662e-05	False
0	15	0	2.99306e-05	False
0	16	0	1.19194e-05	False
0	17	0	4.56341e-06	False
0	18	0	1.67441e-06	False
0	19	0	5.8682e-07	True
0	20	0	1.95713e-07	True
0	21	0	6.18669e-08	True
0	22	0	1.84546e-08	True
0	23	0	5.16947e-09	True
0	24	0	1.35251e-09	True
0	25	0	3.2854e-10	True
0	26	0	7.36026e-11	True
0	27	0	1.50943e-11	True
0	28	0	2.80997e-12	True
0	29	0	4.70401e-13	True
0	30	0	7.00551e-14	True
1	0	2448	1	False
1	1	514	1	False
1	2	184	1	False
1	3	83	0.604773	False
1	4	39	0.350201	False
1	5	9	0.196706	False
1	6	3	0.107703	False
1	7	1	0.0575794	False
1	8	1	0.0300596	False
1	9	0	0.0153138	False
1	10	0	0.00760459	False
1	11	0	0.00367561	False
1	12	0	0.00172627	False
1	13	0	0.000786302	False
1	14	0	0.000346619	False
1	15	0	0.000147535	False
1	16	0	6.04803e-05	False
1	17	0	2.38124e-05	False
1	18	0	8.97714e-06	False
1	19	0	3.22973e-06	False
1	20	0	1.10481e-06	True
1	21	0	3.5788e-07	True
1	22	0	1.09285e-07	True
1	23	0	3.13034e-08	True
1	24	0	8.36407e-09	True
1	25	0	2.07179e-09	True
1	26	0	4.72453e-10	True
1	27	0	9.84158e-11	True
1	28	0	1.85626e-11	True
1	29	0	3.13871e-12	True
1	30	0	4.70401e-13	True
2	0	272	0.472021	False
2	1	171	1	False
2	2	103	1	False
2	3	45	1	False
2	4	39	0.666955	False
2	5	13	0.421223	False
2	6	9	0.254565	False
2	7	6	0.14812	False
2	8	1	0.0832645	False
2	9	0	0.0453004	False
2	10	1	0.0238684	False
2	11	2	0.0121779	False
2	12	0	0.0060124	False
2	13	0	0.00286911	False
2	14	0	0.00132132	False
2	15	0	0.000586159	False
2	16	0	0.000249927	False
2	17	0	0.000102165	False
2	18	0	3.9924e-05	False
2	19	0	1.48666e-05	False
2	20	0	5.25609e-06	False
2	21	0	1.75723e-06	False
2	22	0	5.53023e-07	True
2	23	0	1.63005e-07	True
2	24	0	4.47437e-08	True
2	25	0	1.13647e-08	True
2	26	0	2.65184e-09	True
2	27	0	5.63847e-10	True
2	28	0	1.08239e-10	True
2	29	0	1.85626e-11	True
2	30	0	2.80997e-12	True
3	0	64	0.236137	False
3	1	59	0.604773	False
3	2	72	1	False
3	3	53	1	False
3	4	39	1	False
3	5	22	0.704111	False
3	6	24	0.469618	False
3	7	4	0.298698	False
3	8	1	0.182017	False
3	9	0	0.106583	False
3	10	0	0.0600795	False
3	11	0	0.0326275	False
3	12	0	0.0170727	False
3	13	0	0.00860315	False
3	14	0	0.00417076	False
3	15	0	0.00194241	False
3	16	0	0.00086741	False
3	17	0	0.000370577	False
3	18	0	0.000151058	False
3	19	0	5.85703e-05	False
3	20	0	2.15252e-05	False
3	21	0	7.46803e-06	False
3	22	0	2.4349e-06	False
3	23	0	7.42226e-07	True
3	24	0	2.10302e-07	True
3	25	0	5.50224e-08	True
3	26	0	1.3194e-08	True
3	27	0	2.87511e-09	True
3	28	0	5.63847e-10	True
3	29	0	9.84158e-11	True
3	30	0	1.50943e-11	True
4	0	25	0.120507	False
4	1	30	0.350201	False
4	2	29	0.666955	False
4	3	29	1	False
4	4	24	1	False
4	5	13	1	False
4	6	9	0.729034	False
4	7	3	0.50459	False
4	8	2	0.332922	False
4	9	2	0.210034	False
4	10	2	0.126968	False
4	11	2	0.0736383	False
4	12	1	0.0409971	False
4	13	0	0.021908	False
4	14	1	0.0112299	False
4	15	0	0.00551541	False
4	16	0	0.00259128	False
4	17	0	0.00116223	False
4	18	0	0.000496388	False
4	19	0	0.000201286	False
4	20	0	7.72268e-05	False
4	21	0	2.79221e-05	False
4	22	0	9.47036e-06	False
4	23	0	2.99746e-06	False
4	24	0	8.80076e-07	True
4	25	0	2.38073e-07	True
4	26	0	5.88776e-08	True
4	27	0	1.3194e-08	True
4	28	0	2.65184e-09	True
4	29	0	4.72453e-10	True
4	30	0	7.36026e-11	True
5	0	5	0.0617067	False
5	1	14	0.196706	False
5	2	15	0.421223	False
5	3	17	0.704111	False
5	4	21	1	False
5	5	20	1	False
5	6	9	1	False
5	7	7	0.746886	False
5	8	2	0.530832	False
5	9	2	0.359823	False
5	10	3	0.233038	False
5	11	2	0.144377	False
5	12	1	0.0856199	False
5	13	1	0.0486066	False
5	14	0	0.0264035	False
5	15	0	0.0137108	False
5	16	0	0.00679639	False
5	17	0	0.00320979	False
5	18	0	0.00144085	False
5	19	0	0.00061299	False
5	20	0	0.000246316	False
5	21	0	9.31111e-05	False
5	22	0	3.2959e-05	False
5	23	0	1.08667e-05	False
5	24	0	3.31671e-06	False
5	25	0	9.30573e-07	True
5	26	0	2.38073e-07	True
5	27	0	5.50224e-08	True
5	28	0	1.13647e-08	True
5	29	0	2.07179e-09	True
5	30	0	3.2854e-10	True
6	0	1	0.0314243	False
6	1	8	0.107703	False
6	2	9	0.254565	False
6	3	17	0.469618	False
6	4	18	0.729034	False
6	5	14	1	False
6	6	16	1	False
6	7	10	1	False
6	8	7	0.760188	False
6	9	2	0.550985	False
6	10	2	0.381133	False
6	11	1	0.251804	False
6	12	0	0.158956	False
6	13	0	0.0958792	False
6	14	0	0.0552343	False
6	15	0	0.0303626	False
6	16	0	0.0159045	False
6	17	0	0.00792419	False
6	18	0	0.00374648	False
6	19	1	0.00167605	False
6	20	0	0.000707063	False
6	21	0	0.00028015	False
6	22	0	0.000103763	False
6	23	0	3.57313e-05	False
6	24	0	1.13674e-05	False
6	25	0	3.31671e-06	False
6	26	0	8.80076e-07	True
6	27	0	2.10302e-07	True
6	28	0	4.47437e-08	True
6	29	0	8.36407e-09	True
6	30	0	1.35251e-09	True
7	0	0	0.015826	False
7	1	2	0.0575794	False
7	2	4	0.14812	False
7	3	9	0.298698	False
7	4	9	0.50459	False
7	5	12	0.746886	False
7	6	12	1	False
7	7	8	1	False
7	8	2	1	False
7	9	3	0.770335	False
7	10	6	0.566652	False
7	11	2	0.398025	False
7	12	2	0.266951	False
7	13	3	0.170904	False
7	14	0	0.104377	False
7	15	0	0.0607516	False
7	16	0	0.0336512	False
7	17	1	0.0177061	False
7	18	0	0.00882876	False
7	19	0	0.00415989	False
7	20	0	0.00184572	False
7	21	0	0.000768022	False
7	22	0	0.000298274	False
7	23	0	0.000107511	False
7	24	0	3.57313e-05	False
7	25	0	1.08667e-05	False
7	26	0	2.99746e-06	False
7	27	0	7.42226e-07	True
7	28	0	1.63005e-07	True
7	29	0	3.13034e-08	True
7	30	0	5.16947e-09	True
8	0	0	0.00785031	False
8	1	4	0.0300596	False
8	2	4	0.0832645	False
8	3	1	0.182017	False
8	4	7	0.332922	False
8	5	7	0.530832	False
8	6	9	0.760188	False
8	7	4	1	False
8	8	8	1	False
8	9	4	1	False
8	10	2	0.77816	False
8	11	2	0.578856	False
8	12	2	0.411314	False
8	13	1	0.278958	False
8	14	1	0.180408	False
8	15	0	0.111122	False
8	16	0	0.0650867	False
8	17	0	0.0361806	False
8	18	0	0.0190411	False
8	19	0	0.00945919	False
8	20	0	0.00441999	False
8	21	0	0.00193449	False
8	22	0	0.000789113	False
8	23	0	0.000298274	False
8	24	0	0.000103763	False
8	25	0	3.2959e-05	False
8	26	0	9.47036e-06	False
8	27	0	2.4349e-06	False
8	28	0	5.53023e-07	True
8	29	0	1.09285e-07	True
8	30	0	1.84546e-08	True
9	0	0	0.00382303	False
9	1	2	0.0153138	False
9	2	1	0.0453004	False
9	3	2	0.106583	False
9	4	5	0.210034	False
9	5	3	0.359823	False
9	6	6	0.550985	False
9	7	4	0.770335	False
9	8	6	1	False
9	9	5	1	False
9	10	3	1	False
9	11	6	0.784191	False
9	12	1	0.588279	False
9	13	2	0.42157	False
9	14	2	0.288184	False
9	15	1	0.187632	False
9	16	1	0.116143	False
9	17	0	0.0682012	False
9	18	1	0.0378942	False
9	19	0	0.0198606	False
9	20	0	0.00978249	False
9	21	0	0.0045087	False
9	22	0	0.00193449	False
9	23	0	0.000768022	False
9	24	0	0.00028015	False
9	25	0	9.31111e-05	False
9	26	0	2.79221e-05	False
9	27	0	7.46803e-06	False
9	28	0	1.75723e-06	False
9	29	0	3.5788e-07	True
9	30	0	6.18669e-08	True
10	0	0	0.00182274	False
10	1	0	0.00760459	False
10	2	0	0.0238684	False
10	3	3	0.0600795	False
10	4	9	0.126968	False
10	5	2	0.233038	False
10	6	6	0.381133	False
10	7	3	0.566652	False
10	8	7	0.77816	False
10	9	4	1	False
10	10	6	1	False
10	11	4	1	False
10	12	1	0.788776	False
10	13	4	0.59538	False
10	14	3	0.429195	False
10	15	0	0.294894	False
10	16	0	0.192703	False
10	17	0	0.119471	False
10	18	0	0.0700755	False
10	19	0	0.0387587	False
10	20	0	0.0201368	False
10	21	0	0.00978249	False
10	22	0	0.00441999	False
10	23	0	0.00184572	False
10	24	0	0.000707063	False
10	25	0	0.000246316	False
10	26	0	7.72268e-05	False
10	27	0	2.15252e-05	False
10	28	0	5.25609e-06	False
10	29	0	1.10481e-06	True
10	30	0	1.95713e-07	True
11	0	1	0.000848636	False
11	1	0	0.00367561	False
11	2	0	0.0121779	False
11	3	1	0.0326275	False
11	4	2	0.0736383	False
11	5	3	0.144377	False
11	6	2	0.251804	False
11	7	3	0.398025	False
11	8	6	0.578856	False
11	9	5	0.784191	False
11	10	3	1	False
11	11	6	1	False
11	12	2	1	False
11	13	2	0.792147	False
11	14	2	0.600471	False
11	15	0	0.434464	False
11	16	1	0.299271	False
11	17	0	0.195709	False
11	18	1	0.121128	False
11	19	0	0.0707011	False
11	20	0	0.0387587	False
11	21	0	0.0198606	False
11	22	0	0.00945919	False
11	23	0	0.00415989	False
11	24	0	0.00167605	False
11	25	0	0.00061299	False
11	26	0	0.000201286	False
11	27	0	5.85703e-05	False
11	28	0	1.48666e-05	False
11	29	0	3.22973e-06	False
11	30	0	5.8682e-07	True
12	0	0	0.000384888	False
12	1	0	0.00172627	False
12	2	0	0.0060124	False
12	3	0	0.0170727	False
12	4	0	0.0409971	False
12	5	1	0.0856199	False
12	6	1	0.158956	False
12	7	1	0.266951	False
12	8	1	0.411314	False
12	9	2	0.588279	False
12	10	5	0.788776	False
12	11	3	1	False
12	12	3	1	False
12	13	3	1	False
12	14	3	0.794459	False
12	15	1	0.603761	False
12	16	1	0.437558	False
12	17	1	0.301431	False
12	18	0	0.196706	False
12	19	0	0.121128	False
12	20	0	0.0700755	False
12	21	0	0.0378942	False
12	22	0	0.0190411	False
12	23	0	0.00882876	False
12	24	0	0.00374648	False
12	25	0	0.00144085	False
12	26	0	0.000496388	False
12	27	0	0.000151058	False
12	28	0	3.9924e-05	False
12	29	0	8.97714e-06	False
12	30	0	1.67441e-06	False
13	0	0	0.000169629	False
13	1	1	0.000786302	False
13	2	0	0.00286911	False
13	3	0	0.00860315	False
13	4	1	0.021908	False
13	5	0	0.0486066	False
13	6	1	0.0958792	False
13	7	0	0.170904	False
13	8	1	0.278958	False
13	9	3	0.42157	False
13	10	2	0.59538	False
13	11	3	0.792147	False
13	12	3	1	False
13	13	2	1	False
13	14	4	1	False
13	15	5	0.795809	False
13	16	2	0.605376	False
13	17	2	0.438578	False
13	18	0	0.301431	False
13	19	0	0.195709	False
13	20	4	0.119471	False
13	21	2	0.0682012	False
13	22	0	0.0361806	False
13	23	0	0.0177061	False
13	24	0	0.00792419	False
13	25	0	0.00320979	False
13	26	0	0.00116223	False
13	27	0	0.000370577	False
13	28	0	0.000102165	False
13	29	0	2.38124e-05	False
13	30	0	4.56341e-06	False
14	0	0	7.24662e-05	False
14	1	0	0.000346619	False
14	2	0	0.00132132	False
14	3	0	0.00417076	False
14	4	1	0.0112299	False
14	5	0	0.0264035	False
14	6	1	0.0552343	False
14	7	0	0.104377	False
14	8	1	0.180408	False
14	9	0	0.288184	False
14	10	5	0.429195	False
14	11	1	0.600471	False
14	12	4	0.794459	False
14	13	2	1	False
14	14	1	1	False
14	15	0	1	False
14	16	2	0.796253	False
14	17	2	0.605376	False
14	18	2	0.437558	False
14	19	0	0.299271	False
14	20	3	0.192703	False
14	21	2	0.116143	False
14	22	0	0.0650867	False
14	23	0	0.0336512	False
14	24	0	0.0159045	False
14	25	0	0.00679639	False
14	26	0	0.00259128	False
14	27	0	0.00086741	False
14	28	0	0.000249927	False
14	29	0	6.04803e-05	False
14	30	0	1.19194e-05	False
15	0	0	2.99306e-05	False
15	1	0	0.000147535	False
15	2	0	0.000586159	False
15	3	0	0.00194241	False
15	4	0	0.00551541	False
15	5	0	0.0137108	False
15	6	2	0.0303626	False
15	7	3	0.0607516	False
15	8	3	0.111122	False
15	9	3	0.187632	False
15	10	1	0.294894	False
15	11	3	0.434464	False
15	12	2	0.603761	False
15	13	4	0.795809	False
15	14	5	1	False
15	15	2	1	False
15	16	4	1	False
15	17	0	0.795809	False
15	18	1	0.603761	False
15	19	1	0.434464	False
15	20	0	0.294894	False
15	21	1	0.187632	False
15	22	0	0.111122	False
15	23	0	0.0607516	False
15	24	0	0.0303626	False
15	25	0	0.0137108	False
15	26	0	0.00551541	False
15	27	0	0.00194241	False
15	28	0	0.000586159	False
15	29	0	0.000147535	False
15	30	0	2.99306e-05	False
16	0	0	1.19194e-05	False
16	1	0	6.04803e-05	False
16	2	0	0.000249927	False
16	3	0	0.00086741	False
16	4	0	0.00259128	False
16	5	1	0.00679639	False
16	6	0	0.0159045	False
16	7	0	0.0336512	False
16	8	3	0.0650867	False
16	9	1	0.116143	False
16	10	0	0.192703	False
16	11	4	0.299271	False
16	12	4	0.437558	False
16	13	6	0.605376	False
16	14	5	0.796253	False
16	15	7	1	False
16	16	2	1	False
16	17	3	1	False
16	18	5	0.794459	False
16	19	3	0.600471	False
16	20	3	0.429195	False
16	21	0	0.288184	False
16	22	4	0.180408	False
16	23	1	0.104377	False
16	24	1	0.0552343	False
16	25	1	0.0264035	False
16	26	0	0.0112299	False
16	27	0	0.00417076	False
16	28	0	0.00132132	False
16	29	0	0.000346619	False
16	30	0	7.24662e-05	False
17	0	0	4.56341e-06	False
17	1	0	2.38124e-05	False
17	2	0	0.000102165	False
17	3	0	0.000370577	False
17	4	0	0.00116223	False
17	5	0	0.00320979	False
17	6	0	0.00792419	False
17	7	0	0.0177061	False
17	8	0	0.0361806	False
17	9	0	0.0682012	False
17	10	0	0.119471	False
17	11	2	0.195709	False
17	12	3	0.301431	False
17	13	0	0.438578	False
17	14	4	0.605376	False
17	15	2	0.795809	False
17	16	1	1	False
17	17	9	1	False
17	18	7	1	False
17	19	3	0.792147	False
17	20	3	0.59538	False
17	21	2	0.42157	False
17	22	4	0.278958	False
17	23	1	0.170904	False
17	24	1	0.0958792	False
17	25	0	0.0486066	False
17	26	0	0.021908	False
17	27	0	0.00860315	False
17	28	0	0.00286911	False
17	29	0	0.000786302	False
17	30	0	0.000169629	False
18	0	0	1.67441e-06	False
18	1	0	8.97714e-06	False
18	2	0	3.9924e-05	False
18	3	0	0.000151058	False
18	4	0	0.000496388	False
18	5	0	0.00144085	False
18	6	0	0.00374648	False
18	7	1	0.00882876	False
18	8	0	0.0190411	False
18	9	0	0.0378942	False
18	10	2	0.0700755	False
18	11	0	0.121128	False
18	12	2	0.196706	False
18	13	3	0.301431	False
18	14	3	0.437558	False
18	15	5	0.603761	False
18	16	1	0.794459	False
18	17	6	1	False
18	18	3	1	False
18	19	6	1	False
18	20	4	0.788776	False
18	21	4	0.588279	False
18	22	1	0.411314	False
18	23	1	0.266951	False
18	24	0	0.158956	False
18	25	0	0.0856199	False
18	26	0	0.0409971	False
18	27	0	0.0170727	False
18	28	0	0.0060124	False
18	29	0	0.00172627	False
18	30	0	0.000384888	False
19	0	0	5.8682e-07	True
19	1	0	3.22973e-06	False
19	2	0	1.48666e-05	False
19	3	0	5.85703e-05	False
19	4	0	0.000201286	False
19	5	0	0.00061299	False
19	6	0	0.00167605	False
19	7	0	0.00415989	False
19	8	0	0.00945919	False
19	9	1	0.0198606	False
19	10	0	0.0387587	False
19	11	1	0.0707011	False
19	12	3	0.121128	False
19	13	1	0.195709	False
19	14	1	0.299271	False
19	15	8	0.434464	False
19	16	4	0.600471	False
19	17	2	0.792147	False
19	18	5	1	False
19	19	8	1	False
19	20	3	1	False
19	21	1	0.784191	False
19	22	5	0.578856	False
19	23	2	0.398025	False
19	24	0	0.251804	False
19	25	0	0.144377	False
19	26	0	0.0736383	False
19	27	0	0.0326275	False
19	28	0	0.0121779	False
19	29	0	0.00367561	False
19	30	0	0.000848636	False
20	0	0	1.95713e-07	True
20	1	0	1.10481e-06	True
20	2	0	5.25609e-06	False
20	3	0	2.15252e-05	False
20	4	0	7.72268e-05	False
20	5	0	0.000246316	False
20	6	0	0.000707063	False
20	7	0	0.00184572	False
20	8	0	0.00441999	False
20	9	0	0.00978249	False
20	10	0	0.0201368	False
20	11	0	0.0387587	False
20	12	0	0.0700755	False
20	13	2	0.119471	False
20	14	0	0.192703	False
20	15	1	0.294894	False
20	16	0	0.429195	False
20	17	1	0.59538	False
20	18	4	0.788776	False
20	19	4	1	False
20	20	7	1	False
20	21	3	1	False
20	22	3	0.77816	False
20	23	4	0.566652	False
20	24	0	0.381133	False
20	25	2	0.233038	False
20	26	1	0.126968	False
20	27	0	0.0600795	False
20	28	0	0.0238684	False
20	29	0	0.00760459	False
20	30	0	0.00182274	False
21	0	0	6.18669e-08	True
21	1	0	3.5788e-07	True
21	2	0	1.75723e-06	False
21	3	0	7.46803e-06	False
21	4	0	2.79221e-05	False
21	5	0	9.31111e-05	False
21	6	0	0.00028015	False
21	7	0	0.000768022	False
21	8	0	0.00193449	False
21	9	0	0.0045087	False
21	10	0	0.00978249	False
21	11	0	0.0198606	False
21	12	1	0.0378942	False
21	13	2	0.0682012	False
21	14	0	0.116143	False
21	15	1	0.187632	False
21	16	2	0.288184	False
21	17	2	0.42157	False
21	18	2	0.588279	False
21	19	1	0.784191	False
21	20	5	1	False
21	21	3	1	False
21	22	11	1	False
21	23	7	0.770335	False
21	24	1	0.550985	False
21	25	3	0.359823	False
21	26	4	0.210034	False
21	27	2	0.106583	False
21	28	0	0.0453004	False
21	29	0	0.0153138	False
21	30	0	0.00382303	False
22	0	0	1.84546e-08	True
22	1	0	1.09285e-07	True
22	2	0	5.53023e-07	True
22	3	0	2.4349e-06	False
22	4	0	9.47036e-06	False
22	5	0	3.2959e-05	False
22	6	0	0.000103763	False
22	7	0	0.000298274	False
22	8	0	0.000789113	False
22	9	0	0.00193449	False
22	10	1	0.00441999	False
22	11	1	0.00945919	False
22	12	0	0.0190411	False
22	13	2	0.0361806	False
22	14	0	0.0650867	False
22	15	1	0.111122	False
22	16	3	0.180408	False
22	17	5	0.278958	False
22	18	0	0.411314	False
22	19	3	0.578856	False
22	20	2	0.77816	False
22	21	5	1	False
22	22	4	1	False
22	23	4	1	False
22	24	5	0.760188	False
22	25	2	0.530832	False
22	26	1	0.332922	False
22	27	2	0.182017	False
22	28	0	0.0832645	False
22	29	1	0.0300596	False
22	30	0	0.00785031	False
23	0	0	5.16947e-09	True
23	1	0	3.13034e-08	True
23	2	0	1.63005e-07	True
23	3	0	7.42226e-07	True
23	4	0	2.99746e-06	False
23	5	0	1.08667e-05	False
23	6	0	3.57313e-05	False
23	7	0	0.000107511	False
23	8	0	0.000298274	False
23	9	0	0.000768022	False
23	10	0	0.00184572	False
23	11	0	0.00415989	False
23	12	0	0.00882876	False
23	13	0	0.0177061	False
23	14	0	0.0336512	False
23	15	1	0.0607516	False
23	16	0	0.104377	False
23	17	1	0.170904	False
23	18	5	0.266951	False
23	19	5	0.398025	False
23	20	0	0.566652	False
23	21	8	0.770335	False
23	22	3	1	False
23	23	10	1	False
23	24	4	1	False
23	25	8	0.746886	False
23	26	4	0.50459	False
23	27	3	0.298698	False
23	28	2	0.14812	False
23	29	1	0.0575794	False
23	30	1	0.015826	False
24	0	0	1.35251e-09	True
24	1	0	8.36407e-09	True
24	2	0	4.47437e-08	True
24	3	0	2.10302e-07	True
24	4	0	8.80076e-07	True
24	5	0	3.31671e-06	False
24	6	0	1.13674e-05	False
24	7	0	3.57313e-05	False
24	8	0	0.000103763	False
24	9	0	0.00028015	False
24	10	0	0.000707063	False
24	11	0	0.00167605	False
24	12	1	0.00374648	False
24	13	0	0.00792419	False
24	14	0	0.0159045	False
24	15	0	0.0303626	False
24	16	1	0.0552343	False
24	17	1	0.0958792	False
24	18	1	0.158956	False
24	19	1	0.251804	False
24	20	2	0.381133	False
24	21	7	0.550985	False
24	22	7	0.760188	False
24	23	3	1	False
24	24	8	1	False
24	25	13	1	False
24	26	7	0.729034	False
24	27	7	0.469618	False
24	28	5	0.254565	False
24	29	5	0.107703	False
24	30	1	0.0314243	False
25	0	0	3.2854e-10	True
25	1	0	2.07179e-09	True
25	2	0	1.13647e-08	True
25	3	0	5.50224e-08	True
25	4	0	2.38073e-07	True
25	5	0	9.30573e-07	True
25	6	0	3.31671e-06	False
25	7	0	1.08667e-05	False
25	8	0	3.2959e-05	False
25	9	0	9.31111e-05	False
25	10	0	0.000246316	False
25	11	0	0.00061299	False
25	12	0	0.00144085	False
25	13	0	0.00320979	False
25	14	0	0.00679639	False
25	15	1	0.0137108	False
25	16	0	0.0264035	False
25	17	0	0.0486066	False
25	18	1	0.0856199	False
25	19	1	0.144377	False
25	20	1	0.233038	False
25	21	1	0.359823	False
25	22	1	0.530832	False
25	23	7	0.746886	False
25	24	10	1	False
25	25	6	1	False
25	26	8	1	False
25	27	7	0.704111	False
25	28	11	0.421223	False
25	29	7	0.196706	False
25	30	2	0.0617067	False
26	0	0	7.36026e-11	True
26	1	0	4.72453e-10	True
26	2	0	2.65184e-09	True
26	3	0	1.3194e-08	True
26	4	0	5.88776e-08	True
26	5	0	2.38073e-07	True
26	6	0	8.80076e-07	True
26	7	0	2.99746e-06	False
26	8	0	9.47036e-06	False
26	9	0	2.79221e-05	False
26	10	0	7.72268e-05	False
26	11	0	0.000201286	False
26	12	0	0.000496388	False
26	13	0	0.00116223	False
26	14	0	0.00259128	False
26	15	0	0.00551541	False
26	16	1	0.0112299	False
26	17	0	0.021908	False
26	18	0	0.0409971	False
26	19	2	0.0736383	False
26	20	1	0.126968	False
26	21	3	0.210034	False
26	22	5	0.332922	False
26	23	4	0.50459	False
26	24	5	0.729034	False
26	25	10	1	False
26	26	5	1	False
26	27	18	1	False
26	28	24	0.666955	False
26	29	19	0.350201	False
26	30	11	0.120507	False
27	0	0	1.50943e-11	True
27	1	0	9.84158e-11	True
27	2	0	5.63847e-10	True
27	3	0	2.87511e-09	True
27	4	0	1.3194e-08	True
27	5	0	5.50224e-08	True
27	6	0	2.10302e-07	True
27	7	0	7.42226e-07	True
27	8	0	2.4349e-06	False
27	9	0	7.46803e-06	False
27	10	0	2.15252e-05	False
27	11	0	5.85703e-05	False
27	12	0	0.000151058	False
27	13	0	0.000370577	False
27	14	0	0.00086741	False
27	15	0	0.00194241	False
27	16	0	0.00417076	False
27	17	0	0.00860315	False
27	18	0	0.0170727	False
27	19	0	0.0326275	False
27	20	0	0.0600795	False
27	21	1	0.106583	False
27	22	3	0.182017	False
27	23	2	0.298698	False
27	24	6	0.469618	False
27	25	9	0.704111	False
27	26	9	1	False
27	27	27	1	False
27	28	22	1	False
27	29	33	0.604773	False
27	30	47	0.236137	False
28	0	0	2.80997e-12	True
28	1	0	1.85626e-11	True
28	2	0	1.08239e-10	True
28	3	0	5.63847e-10	True
28	4	0	2.65184e-09	True
28	5	0	1.13647e-08	True
28	6	0	4.47437e-08	True
28	7	0	1.63005e-07	True
28	8	0	5.53023e-07	True
28	9	0	1.75723e-06	False
28	10	0	5.25609e-06	False
28	11	0	1.48666e-05	False
28	12	0	3.9924e-05	False
28	13	0	0.000102165	False
28	14	0	0.000249927	False
28	15	0	0.000586159	False
28	16	0	0.00132132	False
28	17	1	0.00286911	False
28	18	0	0.0060124	False
28	19	0	0.0121779	False
28	20	0	0.0238684	False
28	21	1	0.0453004	False
28	22	0	0.0832645	False
28	23	0	0.14812	False
28	24	1	0.254565	False
28	25	8	0.421223	False
28	26	16	0.666955	False
28	27	17	1	False
28	28	60	1	False
28	29	93	1	False
28	30	226	0.472021	False
29	0	0	4.70401e-13	True
29	1	0	3.13871e-12	True
29	2	0	1.85626e-11	True
29	3	0	9.84158e-11	True
29	4	0	4.72453e-10	True
29	5	0	2.07179e-09	True
29	6	0	8.36407e-09	True
29	7	0	3.13034e-08	True
29	8	0	1.09285e-07	True
29	9	0	3.5788e-07	True
29	10	0	1.10481e-06	True
29	11	0	3.22973e-06	False
29	12	0	8.97714e-06	False
29	13	0	2.38124e-05	False
29	14	0	6.04803e-05	False
29	15	0	0.000147535	False
29	16	0	0.000346619	False
29	17	0	0.000786302	False
29	18	0	0.00172627	False
29	19	0	0.00367561	False
29	20	0	0.00760459	False
29	21	0	0.0153138	False
29	22	0	0.0300596	False
29	23	1	0.0575794	False
29	24	1	0.107703	False
29	25	4	0.196706	False
29	26	9	0.350201	False
29	27	20	0.604773	False
29	28	111	1	False
29	29	463	1	False
29	30	10191	1	False
30	0	0	7.00551e-14	True
30	1	0	4.70401e-13	True
30	2	0	2.80997e-12	True
30	3	0	1.50943e-11	True
30	4	0	7.36026e-11	True
30	5	0	3.2854e-10	True
30	6	0	1.35251e-09	True
30	7	0	5.16947e-09	True
30	8	0	1.84546e-08	True
30	9	0	6.18669e-08	True
30	10	0	1.95713e-07	True
30	11	0	5.8682e-07	True
30	12	0	1.67441e-06	False
30	13	0	4.56341e-06	False
30	14	0	1.19194e-05	False
30	15	0	2.99306e-05	False
30	16	0	7.24662e-05	False
30	17	0	0.000169629	False
30	18	0	0.000384888	False
30	19	0	0.000848636	False
30	20	0	0.00182274	False
30	21	0	0.00382303	False
30	22	0	0.00785031	False
30	23	0	0.015826	False
30	24	0	0.0314243	False
30	25	3	0.0617067	False
30	26	3	0.120507	False
30	27	10	0.236137	False
30	28	82	0.472021	False
30	29	443	1	False
30	30	21747	1	False
