# Supplementary material for: The rise and fall of the ancient northern pike master sex-determining gene
Source: eLife. 2021 Jan 28;10:e62858. doi: 10.7554/eLife.62858 (PMC7870143; doi:10.7554/eLife.62858)
Supplement: Source data 3. [file elife-62858-data3.csv]

Males	Females	Markers	P	Signif
0	1	6641	1	False
0	2	807	0.472498	False
0	3	205	0.236907	False
0	4	65	0.121335	False
0	5	14	0.0624465	False
0	6	2	0.0320149	False
0	7	2	0.0162609	False
0	8	0	0.00815097	False
0	9	0	0.00402003	False
0	10	0	0.00194577	False
0	11	0	0.000922147	False
0	12	0	0.000426982	False
0	13	0	0.000192752	False
0	14	0	8.46529e-05	False
0	15	0	3.60902e-05	False
0	16	0	1.49023e-05	False
0	17	0	5.9456e-06	False
0	18	0	2.28618e-06	False
0	19	0	8.44916e-07	True
0	20	0	2.9925e-07	True
0	21	0	1.0125e-07	True
0	22	0	3.26135e-08	True
0	23	0	9.96353e-09	True
0	24	0	2.87511e-09	True
0	25	0	7.80118e-10	True
0	26	0	1.98047e-10	True
0	27	0	4.67834e-11	True
0	28	0	1.02206e-11	True
0	29	0	2.05114e-12	True
0	30	0	3.75255e-13	True
0	31	0	6.20615e-14	True
0	32	0	9.21485e-15	True
1	0	5472	1	False
1	1	1357	1	False
1	2	603	1	False
1	3	299	0.605577	False
1	4	137	0.351566	False
1	5	57	0.198256	False
1	6	17	0.109155	False
1	7	6	0.0587817	False
1	8	2	0.0309714	False
1	9	0	0.0159588	False
1	10	0	0.00803468	False
1	11	0	0.00394775	False
1	12	0	0.00189033	False
1	13	0	0.000880743	False
1	14	0	0.000398593	False
1	15	0	0.000174887	False
1	16	0	7.42389e-05	False
1	17	0	3.04215e-05	False
1	18	0	1.20044e-05	False
1	19	0	4.54945e-06	False
1	20	0	1.6511e-06	False
1	21	0	5.72017e-07	True
1	22	0	1.88518e-07	True
1	23	0	5.88776e-08	True
1	24	0	1.7353e-08	True
1	25	0	4.80409e-09	True
1	26	0	1.24289e-09	True
1	27	0	2.98785e-10	True
1	28	0	6.63191e-11	True
1	29	0	1.34955e-11	True
1	30	0	2.49789e-12	True
1	31	0	4.16778e-13	True
1	32	0	6.20615e-14	True
2	0	1635	0.472498	False
2	1	788	1	False
2	2	349	1	False
2	3	270	1	False
2	4	168	0.668036	False
2	5	75	0.423131	False
2	6	36	0.256839	False
2	7	10	0.150351	False
2	8	8	0.0851917	False
2	9	4	0.0468165	False
2	10	2	0.0249747	False
2	11	0	0.012935	False
2	12	0	0.0065017	False
2	13	0	0.00316906	False
2	14	0	0.00149616	False
2	15	0	0.000683195	False
2	16	0	0.000301218	False
2	17	0	0.000127977	False
2	18	0	5.22787e-05	False
2	19	0	2.04818e-05	False
2	20	0	7.67441e-06	False
2	21	0	2.74161e-06	False
2	22	0	9.30573e-07	False
2	23	0	2.98961e-07	True
2	24	0	9.05209e-08	True
2	25	0	2.57099e-08	True
2	26	0	6.81361e-09	True
2	27	0	1.67505e-09	True
2	28	0	3.79479e-10	True
2	29	0	7.86416e-11	True
2	30	0	1.47845e-11	True
2	31	0	2.49789e-12	True
2	32	0	3.75255e-13	True
3	0	81	0.236907	False
3	1	163	0.605577	False
3	2	185	1	False
3	3	188	1	False
3	4	145	1	False
3	5	97	0.705457	False
3	6	47	0.472051	False
3	7	33	0.3017	False
3	8	14	0.18507	False
3	9	6	0.109315	False
3	10	1	0.0622985	False
3	11	0	0.0342937	False
3	12	0	0.0182417	False
3	13	0	0.00937477	False
3	14	0	0.00465194	False
3	15	0	0.00222662	False
3	16	0	0.00102661	False
3	17	0	0.00045517	False
3	18	0	0.000193675	False
3	19	0	7.89022e-05	False
3	20	0	3.06942e-05	False
3	21	0	1.13674e-05	False
3	22	0	3.99407e-06	False
3	23	0	1.32635e-06	False
3	24	0	4.14498e-07	True
3	25	0	1.21315e-07	True
3	26	0	3.30745e-08	True
3	27	0	8.34866e-09	True
3	28	0	1.93786e-09	True
3	29	0	4.10453e-10	True
3	30	0	7.86416e-11	True
3	31	0	1.34955e-11	True
3	32	0	2.05114e-12	True
4	0	31	0.121335	False
4	1	58	0.351566	False
4	2	113	0.668036	False
4	3	127	1	False
4	4	130	1	False
4	5	95	1	False
4	6	54	0.730647	False
4	7	36	0.507553	False
4	8	13	0.336668	False
4	9	7	0.21395	False
4	10	1	0.13057	False
4	11	5	0.0766428	False
4	12	0	0.0433081	False
4	13	0	0.0235644	False
4	14	0	0.0123434	False
4	15	0	0.00622019	False
4	16	0	0.00301231	False
4	17	0	0.00139986	False
4	18	0	0.000623114	False
4	19	0	0.000265091	False
4	20	0	0.000107511	False
4	21	0	4.14436e-05	False
4	22	0	1.51335e-05	False
4	23	0	5.21473e-06	False
4	24	0	1.6883e-06	False
4	25	0	5.11046e-07	True
4	26	0	1.43833e-07	True
4	27	0	3.74045e-08	True
4	28	0	8.92434e-09	True
4	29	0	1.93786e-09	True
4	30	0	3.79479e-10	True
4	31	0	6.63191e-11	True
4	32	0	1.02206e-11	True
5	0	3	0.0624465	False
5	1	16	0.198256	False
5	2	42	0.423131	False
5	3	75	0.705457	False
5	4	95	1	False
5	5	75	1	False
5	6	84	1	False
5	7	45	0.748774	False
5	8	28	0.534344	False
5	9	20	0.364346	False
5	10	10	0.237866	False
5	11	5	0.148915	False
5	12	1	0.0894855	False
5	13	0	0.0516386	False
5	14	0	0.0286147	False
5	15	0	0.0152192	False
5	16	0	0.00776241	False
5	17	0	0.00379174	False
5	18	0	0.00177087	False
5	19	0	0.000789113	False
5	20	0	0.00033467	False
5	21	0	0.000134697	False
5	22	0	5.12744e-05	False
5	23	0	1.83896e-05	False
5	24	0	6.18669e-06	False
5	25	0	1.94261e-06	False
5	26	0	5.66083e-07	True
5	27	0	1.52099e-07	True
5	28	0	3.74045e-08	True
5	29	0	8.34866e-09	True
5	30	0	1.67505e-09	True
5	31	0	2.98785e-10	True
5	32	0	4.67834e-11	True
6	0	1	0.0320149	False
6	1	6	0.109155	False
6	2	29	0.256839	False
6	3	33	0.472051	False
6	4	65	0.730647	False
6	5	66	1	False
6	6	68	1	False
6	7	68	1	False
6	8	56	0.762369	False
6	9	26	0.555077	False
6	10	18	0.386476	False
6	11	10	0.257601	False
6	12	5	0.1645	False
6	13	1	0.10068	False
6	14	2	0.0590582	False
6	15	0	0.0331892	False
6	16	0	0.0178543	False
6	17	0	0.00918318	False
6	18	0	0.0045087	False
6	19	0	0.00210884	False
6	20	0	0.000937367	False
6	21	0	0.000394819	False
6	22	0	0.000157052	False
6	23	0	5.87702e-05	False
6	24	0	2.05964e-05	False
6	25	0	6.7254e-06	False
6	26	0	2.03417e-06	False
6	27	0	5.66083e-07	True
6	28	0	1.43833e-07	True
6	29	0	3.30745e-08	True
6	30	0	6.81361e-09	True
6	31	0	1.24289e-09	True
6	32	0	1.98047e-10	True
7	0	1	0.0162609	False
7	1	6	0.0587817	False
7	2	7	0.150351	False
7	3	19	0.3017	False
7	4	33	0.507553	False
7	5	43	0.748774	False
7	6	41	1	False
7	7	43	1	False
7	8	52	1	False
7	9	39	0.77283	False
7	10	23	0.571367	False
7	11	20	0.404248	False
7	12	13	0.27379	False
7	13	4	0.17753	False
7	14	2	0.11019	False
7	15	2	0.0654364	False
7	16	0	0.0371486	False
7	17	0	0.0201368	False
7	18	0	0.0104056	False
7	19	0	0.00511576	False
7	20	0	0.00238703	False
7	21	0	0.00105403	False
7	22	0	0.000438955	False
7	23	0	0.000171725	False
7	24	0	6.28214e-05	False
7	25	0	2.13771e-05	False
7	26	0	6.7254e-06	False
7	27	0	1.94261e-06	False
7	28	0	5.11046e-07	True
7	29	0	1.21315e-07	True
7	30	0	2.57099e-08	True
7	31	0	4.80409e-09	True
7	32	0	7.80118e-10	True
8	0	0	0.00815097	False
8	1	3	0.0309714	False
8	2	1	0.0851917	False
8	3	11	0.18507	False
8	4	17	0.336668	False
8	5	34	0.534344	False
8	6	42	0.762369	False
8	7	38	1	False
8	8	55	1	False
8	9	41	1	False
8	10	35	0.780998	False
8	11	23	0.584249	False
8	12	9	0.418492	False
8	13	7	0.286924	False
8	14	1	0.188206	False
8	15	3	0.11803	False
8	16	1	0.0707011	False
8	17	0	0.0403995	False
8	18	0	0.0219851	False
8	19	0	0.0113709	False
8	20	0	0.00557576	False
8	21	0	0.00258448	False
8	22	0	0.00112848	False
8	23	0	0.000462282	False
8	24	0	0.000176835	False
8	25	0	6.28214e-05	False
8	26	0	2.05964e-05	False
8	27	0	6.18669e-06	False
8	28	0	1.6883e-06	False
8	29	0	4.14498e-07	True
8	30	0	9.05209e-08	True
8	31	0	1.7353e-08	True
8	32	0	2.87511e-09	True
9	0	0	0.00402003	False
9	1	1	0.0159588	False
9	2	2	0.0468165	False
9	3	6	0.109315	False
9	4	3	0.21395	False
9	5	20	0.364346	False
9	6	32	0.555077	False
9	7	38	0.77283	False
9	8	45	1	False
9	9	33	1	False
9	10	56	1	False
9	11	35	0.787406	False
9	12	33	0.594417	False
9	13	21	0.429795	False
9	14	11	0.297382	False
9	15	5	0.196706	False
9	16	2	0.124237	False
9	17	2	0.0748149	False
9	18	0	0.0428807	False
9	19	1	0.0233422	False
9	20	0	0.0120369	False
9	21	0	0.00586228	False
9	22	0	0.00268683	False
9	23	0	0.00115405	False
9	24	0	0.000462282	False
9	25	0	0.000171725	False
9	26	0	5.87702e-05	False
9	27	0	1.83896e-05	False
9	28	0	5.21473e-06	False
9	29	0	1.32635e-06	False
9	30	0	2.98961e-07	True
9	31	0	5.88776e-08	True
9	32	0	9.96353e-09	True
10	0	0	0.00194577	False
10	1	1	0.00803468	False
10	2	0	0.0249747	False
10	3	0	0.0622985	False
10	4	5	0.13057	False
10	5	4	0.237866	False
10	6	13	0.386476	False
10	7	25	0.571367	False
10	8	34	0.780998	False
10	9	48	1	False
10	10	36	1	False
10	11	49	1	False
10	12	33	0.792411	False
10	13	26	0.602345	False
10	14	28	0.438578	False
10	15	13	0.305448	False
10	16	9	0.203171	False
10	17	2	0.12885	False
10	18	0	0.0777599	False
10	19	1	0.0445533	False
10	20	0	0.0241705	False
10	21	0	0.0123766	False
10	22	0	0.00595953	False
10	23	0	0.00268683	False
10	24	0	0.00112848	False
10	25	0	0.000438955	False
10	26	0	0.000157052	False
10	27	0	5.12744e-05	False
10	28	0	1.51335e-05	False
10	29	0	3.99407e-06	False
10	30	0	9.30573e-07	False
10	31	0	1.88518e-07	True
10	32	0	3.26135e-08	True
11	0	0	0.000922147	False
11	1	0	0.00394775	False
11	2	0	0.012935	False
11	3	0	0.0342937	False
11	4	1	0.0766428	False
11	5	8	0.148915	False
11	6	4	0.257601	False
11	7	11	0.404248	False
11	8	29	0.584249	False
11	9	39	0.787406	False
11	10	34	1	False
11	11	48	1	False
11	12	45	1	False
11	13	51	0.796253	False
11	14	27	0.608364	False
11	15	26	0.44514	False
11	16	18	0.31133	False
11	17	5	0.207712	False
11	18	3	0.131904	False
11	19	0	0.0795286	False
11	20	1	0.0453948	False
11	21	0	0.0244489	False
11	22	0	0.0123766	False
11	23	0	0.00586228	False
11	24	0	0.00258448	False
11	25	0	0.00105403	False
11	26	0	0.000394819	False
11	27	0	0.000134697	False
11	28	0	4.14436e-05	False
11	29	0	1.13674e-05	False
11	30	0	2.74161e-06	False
11	31	0	5.72017e-07	True
11	32	0	1.0125e-07	True
12	0	0	0.000426982	False
12	1	0	0.00189033	False
12	2	0	0.0065017	False
12	3	0	0.0182417	False
12	4	0	0.0433081	False
12	5	0	0.0894855	False
12	6	9	0.1645	False
12	7	8	0.27379	False
12	8	16	0.418492	False
12	9	33	0.594417	False
12	10	33	0.792411	False
12	11	31	1	False
12	12	47	1	False
12	13	44	1	False
12	14	43	0.799099	False
12	15	37	0.612704	False
12	16	17	0.449692	False
12	17	13	0.315174	False
12	18	5	0.210406	False
12	19	3	0.133425	False
12	20	2	0.0801183	False
12	21	0	0.0453948	False
12	22	0	0.0241705	False
12	23	0	0.0120369	False
12	24	0	0.00557576	False
12	25	0	0.00238703	False
12	26	0	0.000937367	False
12	27	0	0.00033467	False
12	28	0	0.000107511	False
12	29	0	3.06942e-05	False
12	30	0	7.67441e-06	False
12	31	0	1.6511e-06	False
12	32	0	2.9925e-07	True
13	0	0	0.000192752	False
13	1	0	0.000880743	False
13	2	0	0.00316906	False
13	3	0	0.00937477	False
13	4	0	0.0235644	False
13	5	1	0.0516386	False
13	6	1	0.10068	False
13	7	5	0.17753	False
13	8	15	0.286924	False
13	9	26	0.429795	False
13	10	30	0.602345	False
13	11	35	0.796253	False
13	12	53	1	False
13	13	46	1	False
13	14	52	1	False
13	15	51	0.801059	False
13	16	46	0.615519	False
13	17	24	0.45237	False
13	18	20	0.317074	False
13	19	9	0.2113	False
13	20	4	0.133425	False
13	21	2	0.0795286	False
13	22	0	0.0445533	False
13	23	0	0.0233422	False
13	24	0	0.0113709	False
13	25	0	0.00511576	False
13	26	0	0.00210884	False
13	27	0	0.000789113	False
13	28	0	0.000265091	False
13	29	0	7.89022e-05	False
13	30	0	2.04818e-05	False
13	31	0	4.54945e-06	False
13	32	0	8.44916e-07	True
14	0	0	8.46529e-05	False
14	1	0	0.000398593	False
14	2	0	0.00149616	False
14	3	0	0.00465194	False
14	4	0	0.0123434	False
14	5	0	0.0286147	False
14	6	2	0.0590582	False
14	7	8	0.11019	False
14	8	5	0.188206	False
14	9	9	0.297382	False
14	10	17	0.438578	False
14	11	30	0.608364	False
14	12	46	0.799099	False
14	13	58	1	False
14	14	73	1	False
14	15	88	1	False
14	16	50	0.802209	False
14	17	47	0.616903	False
14	18	28	0.453255	False
14	19	12	0.317074	False
14	20	8	0.210406	False
14	21	6	0.131904	False
14	22	3	0.0777599	False
14	23	0	0.0428807	False
14	24	0	0.0219851	False
14	25	0	0.0104056	False
14	26	0	0.0045087	False
14	27	0	0.00177087	False
14	28	0	0.000623114	False
14	29	0	0.000193675	False
14	30	0	5.22787e-05	False
14	31	0	1.20044e-05	False
14	32	0	2.28618e-06	False
15	0	0	3.60902e-05	False
15	1	0	0.000174887	False
15	2	0	0.000683195	False
15	3	0	0.00222662	False
15	4	0	0.00622019	False
15	5	0	0.0152192	False
15	6	1	0.0331892	False
15	7	3	0.0654364	False
15	8	3	0.11803	False
15	9	9	0.196706	False
15	10	10	0.305448	False
15	11	24	0.44514	False
15	12	36	0.612704	False
15	13	43	0.801059	False
15	14	68	1	False
15	15	76	1	False
15	16	68	1	False
15	17	64	0.802587	False
15	18	51	0.616903	False
15	19	26	0.45237	False
15	20	14	0.315174	False
15	21	10	0.207712	False
15	22	5	0.12885	False
15	23	4	0.0748149	False
15	24	1	0.0403995	False
15	25	0	0.0201368	False
15	26	0	0.00918318	False
15	27	0	0.00379174	False
15	28	0	0.00139986	False
15	29	0	0.00045517	False
15	30	0	0.000127977	False
15	31	0	3.04215e-05	False
15	32	0	5.9456e-06	False
16	0	0	1.49023e-05	False
16	1	0	7.42389e-05	False
16	2	0	0.000301218	False
16	3	0	0.00102661	False
16	4	0	0.00301231	False
16	5	0	0.00776241	False
16	6	0	0.0178543	False
16	7	4	0.0371486	False
16	8	1	0.0707011	False
16	9	4	0.124237	False
16	10	3	0.203171	False
16	11	10	0.31133	False
16	12	24	0.449692	False
16	13	34	0.615519	False
16	14	50	0.802209	False
16	15	62	1	False
16	16	69	1	False
16	17	90	1	False
16	18	56	0.802209	False
16	19	40	0.615519	False
16	20	36	0.449692	False
16	21	23	0.31133	False
16	22	8	0.203171	False
16	23	3	0.124237	False
16	24	1	0.0707011	False
16	25	0	0.0371486	False
16	26	0	0.0178543	False
16	27	0	0.00776241	False
16	28	0	0.00301231	False
16	29	0	0.00102661	False
16	30	0	0.000301218	False
16	31	0	7.42389e-05	False
16	32	0	1.49023e-05	False
17	0	0	5.9456e-06	False
17	1	0	3.04215e-05	False
17	2	0	0.000127977	False
17	3	0	0.00045517	False
17	4	0	0.00139986	False
17	5	0	0.00379174	False
17	6	0	0.00918318	False
17	7	0	0.0201368	False
17	8	1	0.0403995	False
17	9	3	0.0748149	False
17	10	3	0.12885	False
17	11	3	0.207712	False
17	12	16	0.315174	False
17	13	26	0.45237	False
17	14	40	0.616903	False
17	15	64	0.802587	False
17	16	101	1	False
17	17	85	1	False
17	18	73	1	False
17	19	80	0.801059	False
17	20	54	0.612704	False
17	21	35	0.44514	False
17	22	16	0.305448	False
17	23	9	0.196706	False
17	24	1	0.11803	False
17	25	0	0.0654364	False
17	26	0	0.0331892	False
17	27	0	0.0152192	False
17	28	0	0.00622019	False
17	29	0	0.00222662	False
17	30	0	0.000683195	False
17	31	0	0.000174887	False
17	32	0	3.60902e-05	False
18	0	0	2.28618e-06	False
18	1	0	1.20044e-05	False
18	2	0	5.22787e-05	False
18	3	0	0.000193675	False
18	4	0	0.000623114	False
18	5	0	0.00177087	False
18	6	0	0.0045087	False
18	7	0	0.0104056	False
18	8	0	0.0219851	False
18	9	1	0.0428807	False
18	10	3	0.0777599	False
18	11	3	0.131904	False
18	12	4	0.210406	False
18	13	17	0.317074	False
18	14	30	0.453255	False
18	15	43	0.616903	False
18	16	85	0.802209	False
18	17	99	1	False
18	18	110	1	False
18	19	89	1	False
18	20	75	0.799099	False
18	21	56	0.608364	False
18	22	25	0.438578	False
18	23	15	0.297382	False
18	24	4	0.188206	False
18	25	2	0.11019	False
18	26	0	0.0590582	False
18	27	0	0.0286147	False
18	28	0	0.0123434	False
18	29	0	0.00465194	False
18	30	0	0.00149616	False
18	31	0	0.000398593	False
18	32	0	8.46529e-05	False
19	0	0	8.44916e-07	True
19	1	0	4.54945e-06	False
19	2	0	2.04818e-05	False
19	3	0	7.89022e-05	False
19	4	0	0.000265091	False
19	5	0	0.000789113	False
19	6	0	0.00210884	False
19	7	0	0.00511576	False
19	8	0	0.0113709	False
19	9	0	0.0233422	False
19	10	1	0.0445533	False
19	11	3	0.0795286	False
19	12	4	0.133425	False
19	13	10	0.2113	False
19	14	20	0.317074	False
19	15	35	0.45237	False
19	16	63	0.615519	False
19	17	74	0.801059	False
19	18	87	1	False
19	19	132	1	False
19	20	101	1	False
19	21	78	0.796253	False
19	22	35	0.602345	False
19	23	22	0.429795	False
19	24	19	0.286924	False
19	25	5	0.17753	False
19	26	3	0.10068	False
19	27	1	0.0516386	False
19	28	0	0.0235644	False
19	29	0	0.00937477	False
19	30	0	0.00316906	False
19	31	0	0.000880743	False
19	32	0	0.000192752	False
20	0	0	2.9925e-07	True
20	1	0	1.6511e-06	False
20	2	0	7.67441e-06	False
20	3	0	3.06942e-05	False
20	4	0	0.000107511	False
20	5	0	0.00033467	False
20	6	0	0.000937367	False
20	7	0	0.00238703	False
20	8	0	0.00557576	False
20	9	0	0.0120369	False
20	10	1	0.0241705	False
20	11	0	0.0453948	False
20	12	4	0.0801183	False
20	13	4	0.133425	False
20	14	8	0.210406	False
20	15	21	0.315174	False
20	16	48	0.449692	False
20	17	59	0.612704	False
20	18	99	0.799099	False
20	19	139	1	False
20	20	146	1	False
20	21	120	1	False
20	22	81	0.792411	False
20	23	47	0.594417	False
20	24	24	0.418492	False
20	25	4	0.27379	False
20	26	7	0.1645	False
20	27	1	0.0894855	False
20	28	0	0.0433081	False
20	29	0	0.0182417	False
20	30	0	0.0065017	False
20	31	0	0.00189033	False
20	32	0	0.000426982	False
21	0	0	1.0125e-07	True
21	1	0	5.72017e-07	True
21	2	0	2.74161e-06	False
21	3	0	1.13674e-05	False
21	4	0	4.14436e-05	False
21	5	0	0.000134697	False
21	6	0	0.000394819	False
21	7	0	0.00105403	False
21	8	0	0.00258448	False
21	9	0	0.00586228	False
21	10	0	0.0123766	False
21	11	0	0.0244489	False
21	12	1	0.0453948	False
21	13	0	0.0795286	False
21	14	8	0.131904	False
21	15	14	0.207712	False
21	16	34	0.31133	False
21	17	56	0.44514	False
21	18	99	0.608364	False
21	19	123	0.796253	False
21	20	159	1	False
21	21	142	1	False
21	22	143	1	False
21	23	85	0.787406	False
21	24	45	0.584249	False
21	25	20	0.404248	False
21	26	5	0.257601	False
21	27	3	0.148915	False
21	28	1	0.0766428	False
21	29	0	0.0342937	False
21	30	0	0.012935	False
21	31	0	0.00394775	False
21	32	0	0.000922147	False
22	0	0	3.26135e-08	True
22	1	0	1.88518e-07	True
22	2	0	9.30573e-07	False
22	3	0	3.99407e-06	False
22	4	0	1.51335e-05	False
22	5	0	5.12744e-05	False
22	6	0	0.000157052	False
22	7	0	0.000438955	False
22	8	0	0.00112848	False
22	9	0	0.00268683	False
22	10	0	0.00595953	False
22	11	0	0.0123766	False
22	12	0	0.0241705	False
22	13	1	0.0445533	False
22	14	1	0.0777599	False
22	15	7	0.12885	False
22	16	18	0.203171	False
22	17	31	0.305448	False
22	18	71	0.438578	False
22	19	95	0.602345	False
22	20	128	0.792411	False
22	21	198	1	False
22	22	156	1	False
22	23	117	1	False
22	24	76	0.780998	False
22	25	35	0.571367	False
22	26	18	0.386476	False
22	27	5	0.237866	False
22	28	5	0.13057	False
22	29	0	0.0622985	False
22	30	0	0.0249747	False
22	31	0	0.00803468	False
22	32	0	0.00194577	False
23	0	0	9.96353e-09	True
23	1	0	5.88776e-08	True
23	2	0	2.98961e-07	True
23	3	0	1.32635e-06	False
23	4	0	5.21473e-06	False
23	5	0	1.83896e-05	False
23	6	0	5.87702e-05	False
23	7	0	0.000171725	False
23	8	0	0.000462282	False
23	9	0	0.00115405	False
23	10	0	0.00268683	False
23	11	0	0.00586228	False
23	12	0	0.0120369	False
23	13	0	0.0233422	False
23	14	0	0.0428807	False
23	15	6	0.0748149	False
23	16	12	0.124237	False
23	17	23	0.196706	False
23	18	67	0.297382	False
23	19	80	0.429795	False
23	20	151	0.594417	False
23	21	198	0.787406	False
23	22	213	1	False
23	23	173	1	False
23	24	136	1	False
23	25	87	0.77283	False
23	26	28	0.555077	False
23	27	9	0.364346	False
23	28	3	0.21395	False
23	29	0	0.109315	False
23	30	0	0.0468165	False
23	31	0	0.0159588	False
23	32	0	0.00402003	False
24	0	0	2.87511e-09	True
24	1	0	1.7353e-08	True
24	2	0	9.05209e-08	True
24	3	0	4.14498e-07	True
24	4	0	1.6883e-06	False
24	5	0	6.18669e-06	False
24	6	0	2.05964e-05	False
24	7	0	6.28214e-05	False
24	8	0	0.000176835	False
24	9	0	0.000462282	False
24	10	0	0.00112848	False
24	11	0	0.00258448	False
24	12	0	0.00557576	False
24	13	0	0.0113709	False
24	14	0	0.0219851	False
24	15	1	0.0403995	False
24	16	7	0.0707011	False
24	17	11	0.11803	False
24	18	26	0.188206	False
24	19	69	0.286924	False
24	20	130	0.418492	False
24	21	166	0.584249	False
24	22	225	0.780998	False
24	23	259	1	False
24	24	228	1	False
24	25	122	1	False
24	26	73	0.762369	False
24	27	36	0.534344	False
24	28	7	0.336668	False
24	29	4	0.18507	False
24	30	4	0.0851917	False
24	31	0	0.0309714	False
24	32	0	0.00815097	False
25	0	0	7.80118e-10	True
25	1	0	4.80409e-09	True
25	2	0	2.57099e-08	True
25	3	0	1.21315e-07	True
25	4	0	5.11046e-07	True
25	5	0	1.94261e-06	False
25	6	0	6.7254e-06	False
25	7	0	2.13771e-05	False
25	8	0	6.28214e-05	False
25	9	0	0.000171725	False
25	10	0	0.000438955	False
25	11	0	0.00105403	False
25	12	0	0.00238703	False
25	13	0	0.00511576	False
25	14	0	0.0104056	False
25	15	1	0.0201368	False
25	16	2	0.0371486	False
25	17	7	0.0654364	False
25	18	13	0.11019	False
25	19	44	0.17753	False
25	20	84	0.27379	False
25	21	164	0.404248	False
25	22	243	0.571367	False
25	23	278	0.77283	False
25	24	262	1	False
25	25	198	1	False
25	26	115	1	False
25	27	75	0.748774	False
25	28	25	0.507553	False
25	29	11	0.3017	False
25	30	1	0.150351	False
25	31	1	0.0587817	False
25	32	0	0.0162609	False
26	0	0	1.98047e-10	True
26	1	0	1.24289e-09	True
26	2	0	6.81361e-09	True
26	3	0	3.30745e-08	True
26	4	0	1.43833e-07	True
26	5	0	5.66083e-07	True
26	6	0	2.03417e-06	False
26	7	0	6.7254e-06	False
26	8	0	2.05964e-05	False
26	9	0	5.87702e-05	False
26	10	0	0.000157052	False
26	11	0	0.000394819	False
26	12	0	0.000937367	False
26	13	0	0.00210884	False
26	14	0	0.0045087	False
26	15	0	0.00918318	False
26	16	0	0.0178543	False
26	17	1	0.0331892	False
26	18	3	0.0590582	False
26	19	24	0.10068	False
26	20	56	0.1645	False
26	21	123	0.257601	False
26	22	224	0.386476	False
26	23	302	0.555077	False
26	24	347	0.762369	False
26	25	284	1	False
26	26	209	1	False
26	27	129	1	False
26	28	58	0.730647	False
26	29	16	0.472051	False
26	30	8	0.256839	False
26	31	1	0.109155	False
26	32	0	0.0320149	False
27	0	0	4.67834e-11	True
27	1	0	2.98785e-10	True
27	2	0	1.67505e-09	True
27	3	0	8.34866e-09	True
27	4	0	3.74045e-08	True
27	5	0	1.52099e-07	True
27	6	0	5.66083e-07	True
27	7	0	1.94261e-06	False
27	8	0	6.18669e-06	False
27	9	0	1.83896e-05	False
27	10	0	5.12744e-05	False
27	11	0	0.000134697	False
27	12	0	0.00033467	False
27	13	0	0.000789113	False
27	14	0	0.00177087	False
27	15	0	0.00379174	False
27	16	0	0.00776241	False
27	17	1	0.0152192	False
27	18	3	0.0286147	False
27	19	11	0.0516386	False
27	20	29	0.0894855	False
27	21	78	0.148915	False
27	22	172	0.237866	False
27	23	261	0.364346	False
27	24	330	0.534344	False
27	25	353	0.748774	False
27	26	301	1	False
27	27	226	1	False
27	28	97	1	False
27	29	43	0.705457	False
27	30	14	0.423131	False
27	31	5	0.198256	False
27	32	0	0.0624465	False
28	0	0	1.02206e-11	True
28	1	0	6.63191e-11	True
28	2	0	3.79479e-10	True
28	3	0	1.93786e-09	True
28	4	0	8.92434e-09	True
28	5	0	3.74045e-08	True
28	6	0	1.43833e-07	True
28	7	0	5.11046e-07	True
28	8	0	1.6883e-06	False
28	9	0	5.21473e-06	False
28	10	0	1.51335e-05	False
28	11	0	4.14436e-05	False
28	12	0	0.000107511	False
28	13	0	0.000265091	False
28	14	0	0.000623114	False
28	15	0	0.00139986	False
28	16	0	0.00301231	False
28	17	0	0.00622019	False
28	18	0	0.0123434	False
28	19	2	0.0235644	False
28	20	15	0.0433081	False
28	21	40	0.0766428	False
28	22	111	0.13057	False
28	23	212	0.21395	False
28	24	313	0.336668	False
28	25	458	0.507553	False
28	26	469	0.730647	False
28	27	349	1	False
28	28	213	1	False
28	29	98	1	False
28	30	39	0.668036	False
28	31	14	0.351566	False
28	32	4	0.121335	False
29	0	0	2.05114e-12	True
29	1	0	1.34955e-11	True
29	2	0	7.86416e-11	True
29	3	0	4.10453e-10	True
29	4	0	1.93786e-09	True
29	5	0	8.34866e-09	True
29	6	0	3.30745e-08	True
29	7	0	1.21315e-07	True
29	8	0	4.14498e-07	True
29	9	0	1.32635e-06	False
29	10	0	3.99407e-06	False
29	11	0	1.13674e-05	False
29	12	0	3.06942e-05	False
29	13	0	7.89022e-05	False
29	14	0	0.000193675	False
29	15	0	0.00045517	False
29	16	0	0.00102661	False
29	17	0	0.00222662	False
29	18	0	0.00465194	False
29	19	0	0.00937477	False
29	20	7	0.0182417	False
29	21	12	0.0342937	False
29	22	46	0.0622985	False
29	23	131	0.109315	False
29	24	295	0.18507	False
29	25	459	0.3017	False
29	26	581	0.472051	False
29	27	575	0.705457	False
29	28	439	1	False
29	29	246	1	False
29	30	86	1	False
29	31	42	0.605577	False
29	32	9	0.236907	False
30	0	0	3.75255e-13	True
30	1	0	2.49789e-12	True
30	2	0	1.47845e-11	True
30	3	0	7.86416e-11	True
30	4	0	3.79479e-10	True
30	5	0	1.67505e-09	True
30	6	0	6.81361e-09	True
30	7	0	2.57099e-08	True
30	8	0	9.05209e-08	True
30	9	0	2.98961e-07	True
30	10	0	9.30573e-07	False
30	11	0	2.74161e-06	False
30	12	0	7.67441e-06	False
30	13	0	2.04818e-05	False
30	14	0	5.22787e-05	False
30	15	0	0.000127977	False
30	16	0	0.000301218	False
30	17	0	0.000683195	False
30	18	0	0.00149616	False
30	19	0	0.00316906	False
30	20	1	0.0065017	False
30	21	2	0.012935	False
30	22	10	0.0249747	False
30	23	44	0.0468165	False
30	24	160	0.0851917	False
30	25	366	0.150351	False
30	26	685	0.256839	False
30	27	793	0.423131	False
30	28	730	0.668036	False
30	29	515	1	False
30	30	307	1	False
30	31	183	1	False
30	32	71	0.472498	False
31	0	0	6.20615e-14	True
31	1	0	4.16778e-13	True
31	2	0	2.49789e-12	True
31	3	0	1.34955e-11	True
31	4	0	6.63191e-11	True
31	5	0	2.98785e-10	True
31	6	0	1.24289e-09	True
31	7	0	4.80409e-09	True
31	8	0	1.7353e-08	True
31	9	0	5.88776e-08	True
31	10	0	1.88518e-07	True
31	11	0	5.72017e-07	True
31	12	0	1.6511e-06	False
31	13	0	4.54945e-06	False
31	14	0	1.20044e-05	False
31	15	0	3.04215e-05	False
31	16	0	7.42389e-05	False
31	17	0	0.000174887	False
31	18	0	0.000398593	False
31	19	0	0.000880743	False
31	20	0	0.00189033	False
31	21	2	0.00394775	False
31	22	3	0.00803468	False
31	23	8	0.0159588	False
31	24	48	0.0309714	False
31	25	160	0.0587817	False
31	26	377	0.109155	False
31	27	671	0.198256	False
31	28	841	0.351566	False
31	29	845	0.605577	False
31	30	679	1	False
31	31	663	1	False
31	32	390	1	False
32	0	0	9.21485e-15	True
32	1	0	6.20615e-14	True
32	2	0	3.75255e-13	True
32	3	0	2.05114e-12	True
32	4	0	1.02206e-11	True
32	5	0	4.67834e-11	True
32	6	0	1.98047e-10	True
32	7	0	7.80118e-10	True
32	8	0	2.87511e-09	True
32	9	0	9.96353e-09	True
32	10	0	3.26135e-08	True
32	11	0	1.0125e-07	True
32	12	0	2.9925e-07	True
32	13	0	8.44916e-07	True
32	14	0	2.28618e-06	False
32	15	0	5.9456e-06	False
32	16	0	1.49023e-05	False
32	17	0	3.60902e-05	False
32	18	0	8.46529e-05	False
32	19	0	0.000192752	False
32	20	0	0.000426982	False
32	21	0	0.000922147	False
32	22	0	0.00194577	False
32	23	1	0.00402003	False
32	24	6	0.00815097	False
32	25	33	0.0162609	False
32	26	84	0.0320149	False
32	27	243	0.0624465	False
32	28	414	0.121335	False
32	29	589	0.236907	False
32	30	701	0.472498	False
32	31	1377	1	False
32	32	2056	1	False
