# Supplementary material for: The rise and fall of the ancient northern pike master sex-determining gene
Source: eLife. 2021 Jan 28;10:e62858. doi: 10.7554/eLife.62858 (PMC7870143; doi:10.7554/eLife.62858)
Supplement: Source data 5. [file elife-62858-data5.csv]

Contig	Position	Length	Snps_females	Snps_males	Fst	Abs_depth_females	Abs_depth_males	Rel_depth_females	Rel_depth_males	Depth_ratio
CM015574.1_RaGOO	0	43054107	0	1	0.0000	31	24	0.99	0.96	1.29
CM015574.1_RaGOO	50000	43054107	0	8	0.0000	29	23	0.94	0.92	1.30
CM015574.1_RaGOO	100000	43054107	7	0	0.0000	29	22	0.93	0.91	1.29
CM015574.1_RaGOO	150000	43054107	0	0	0.0000	29	23	0.95	0.93	1.28
CM015574.1_RaGOO	200000	43054107	0	1	0.0000	27	21	0.86	0.84	1.30
CM015574.1_RaGOO	250000	43054107	4	2	0.0000	29	23	0.95	0.95	1.25
CM015574.1_RaGOO	300000	43054107	15	20	0.0000	26	21	0.84	0.84	1.26
CM015574.1_RaGOO	350000	43054107	5	1	0.0000	28	21	0.89	0.86	1.32
CM015574.1_RaGOO	400000	43054107	1	0	0.0000	27	21	0.87	0.86	1.27
CM015574.1_RaGOO	450000	43054107	1	9	0.0000	28	22	0.90	0.91	1.24
CM015574.1_RaGOO	500000	43054107	2	0	0.0000	26	20	0.84	0.83	1.27
CM015574.1_RaGOO	550000	43054107	0	2	0.0000	26	21	0.85	0.86	1.26
CM015574.1_RaGOO	600000	43054107	1	1	0.0000	27	22	0.88	0.88	1.26
CM015574.1_RaGOO	650000	43054107	1	3	0.0000	27	22	0.89	0.91	1.22
CM015574.1_RaGOO	700000	43054107	2	0	0.0000	28	22	0.90	0.88	1.29
CM015574.1_RaGOO	750000	43054107	0	1	0.0000	28	23	0.89	0.92	1.23
CM015574.1_RaGOO	800000	43054107	2	4	0.0000	29	23	0.95	0.95	1.26
CM015574.1_RaGOO	850000	43054107	0	0	0.0000	28	21	0.90	0.87	1.31
CM015574.1_RaGOO	900000	43054107	0	0	0.0000	27	21	0.87	0.86	1.28
CM015574.1_RaGOO	950000	43054107	1	0	0.0000	27	22	0.87	0.88	1.25
CM015574.1_RaGOO	1000000	43054107	2	2	0.0000	27	22	0.87	0.90	1.22
CM015574.1_RaGOO	1050000	43054107	3	0	0.0000	27	21	0.86	0.86	1.27
CM015574.1_RaGOO	1100000	43054107	4	6	0.0000	33	25	1.05	1.02	1.30
CM015574.1_RaGOO	1150000	43054107	12	1	0.0000	27	21	0.86	0.85	1.28
CM015574.1_RaGOO	1200000	43054107	11	2	0.0000	26	20	0.84	0.83	1.28
CM015574.1_RaGOO	1250000	43054107	2	2	0.0000	26	21	0.85	0.84	1.27
CM015574.1_RaGOO	1300000	43054107	1	0	0.0000	26	21	0.85	0.85	1.27
CM015574.1_RaGOO	1350000	43054107	3	1	0.0000	28	22	0.91	0.89	1.29
CM015574.1_RaGOO	1400000	43054107	2	3	0.0000	28	22	0.90	0.88	1.30
CM015574.1_RaGOO	1450000	43054107	6	1	0.0000	29	23	0.94	0.93	1.28
CM015574.1_RaGOO	1500000	43054107	1	0	0.0000	29	23	0.92	0.92	1.26
CM015574.1_RaGOO	1550000	43054107	28	2	0.0000	28	22	0.90	0.88	1.28
CM015574.1_RaGOO	1600000	43054107	9	4	0.0000	27	22	0.88	0.88	1.26
CM015574.1_RaGOO	1650000	43054107	2	9	0.0000	27	22	0.88	0.90	1.22
CM015574.1_RaGOO	1700000	43054107	3	2	0.0000	29	23	0.92	0.92	1.26
CM015574.1_RaGOO	1750000	43054107	0	0	0.0000	31	25	1.01	1.01	1.27
CM015574.1_RaGOO	1800000	43054107	4	3	0.0000	32	24	1.03	0.98	1.32
CM015574.1_RaGOO	1850000	43054107	2	3	0.0000	28	23	0.91	0.94	1.21
CM015574.1_RaGOO	1900000	43054107	12	0	0.0000	27	21	0.88	0.85	1.30
CM015574.1_RaGOO	1950000	43054107	8	0	0.0000	28	22	0.89	0.88	1.28
CM015574.1_RaGOO	2000000	43054107	4	10	0.0000	28	22	0.91	0.88	1.30
CM015574.1_RaGOO	2050000	43054107	0	9	0.0000	29	23	0.92	0.92	1.26
CM015574.1_RaGOO	2100000	43054107	2	2	0.0000	29	22	0.93	0.90	1.31
CM015574.1_RaGOO	2150000	43054107	8	0	0.0000	29	24	0.95	0.97	1.23
CM015574.1_RaGOO	2200000	43054107	0	1	0.0000	26	21	0.85	0.84	1.28
CM015574.1_RaGOO	2250000	43054107	5	1	0.0000	30	24	0.96	0.96	1.27
CM015574.1_RaGOO	2300000	43054107	3	3	0.0000	29	23	0.93	0.92	1.28
CM015574.1_RaGOO	2350000	43054107	1	0	0.0000	29	23	0.94	0.95	1.26
CM015574.1_RaGOO	2400000	43054107	2	5	0.0000	28	22	0.91	0.91	1.26
CM015574.1_RaGOO	2450000	43054107	0	7	0.0000	30	24	0.97	0.98	1.25
CM015574.1_RaGOO	2500000	43054107	1	0	0.0000	30	23	0.96	0.94	1.28
CM015574.1_RaGOO	2550000	43054107	0	0	0.0000	30	24	0.95	0.98	1.23
CM015574.1_RaGOO	2600000	43054107	0	1	0.0000	30	24	0.97	0.96	1.27
CM015574.1_RaGOO	2650000	43054107	6	2	0.0000	31	25	1.01	1.00	1.28
CM015574.1_RaGOO	2700000	43054107	0	0	0.0000	31	24	0.99	0.97	1.28
CM015574.1_RaGOO	2750000	43054107	0	1	0.0000	29	24	0.95	0.96	1.24
CM015574.1_RaGOO	2800000	43054107	1	0	0.0000	31	25	1.00	1.03	1.22
CM015574.1_RaGOO	2850000	43054107	5	0	0.0000	29	23	0.93	0.93	1.26
CM015574.1_RaGOO	2900000	43054107	0	1	0.0000	29	23	0.92	0.93	1.25
CM015574.1_RaGOO	2950000	43054107	1	3	0.0000	30	23	0.95	0.92	1.31
CM015574.1_RaGOO	3000000	43054107	7	3	0.0000	29	22	0.94	0.91	1.29
CM015574.1_RaGOO	3050000	43054107	2	1	0.0000	29	22	0.93	0.89	1.31
CM015574.1_RaGOO	3100000	43054107	2	0	0.0000	31	23	0.99	0.95	1.31
CM015574.1_RaGOO	3150000	43054107	2	3	0.0000	28	23	0.92	0.94	1.24
CM015574.1_RaGOO	3200000	43054107	6	1	0.0000	31	23	1.00	0.95	1.33
CM015574.1_RaGOO	3250000	43054107	2	0	0.0000	33	25	1.07	1.02	1.33
CM015574.1_RaGOO	3300000	43054107	3	2	0.0000	29	22	0.93	0.89	1.31
CM015574.1_RaGOO	3350000	43054107	1	3	0.0000	29	23	0.94	0.93	1.27
CM015574.1_RaGOO	3400000	43054107	4	6	0.0000	30	23	0.95	0.94	1.28
CM015574.1_RaGOO	3450000	43054107	3	0	0.0000	30	24	0.97	0.99	1.23
CM015574.1_RaGOO	3500000	43054107	2	1	0.0000	30	24	0.96	0.96	1.25
CM015574.1_RaGOO	3550000	43054107	7	2	0.0000	29	22	0.94	0.90	1.32
CM015574.1_RaGOO	3600000	43054107	2	5	0.0000	28	21	0.89	0.86	1.30
CM015574.1_RaGOO	3650000	43054107	2	6	0.0000	30	23	0.96	0.92	1.30
CM015574.1_RaGOO	3700000	43054107	4	5	0.0000	30	23	0.95	0.95	1.26
CM015574.1_RaGOO	3750000	43054107	1	1	0.0000	30	24	0.97	0.97	1.27
CM015574.1_RaGOO	3800000	43054107	0	2	0.0000	32	25	1.04	1.01	1.31
CM015574.1_RaGOO	3850000	43054107	3	6	0.0000	31	24	1.01	0.98	1.30
CM015574.1_RaGOO	3900000	43054107	2	6	0.0000	30	23	0.97	0.96	1.28
CM015574.1_RaGOO	3950000	43054107	1	0	0.0000	30	25	0.97	1.00	1.22
CM015574.1_RaGOO	4000000	43054107	3	0	0.0000	30	24	0.97	0.96	1.27
CM015574.1_RaGOO	4050000	43054107	4	1	0.0000	32	25	1.03	1.01	1.30
CM015574.1_RaGOO	4100000	43054107	2	0	0.0000	30	23	0.96	0.93	1.30
CM015574.1_RaGOO	4150000	43054107	1	0	0.0000	30	23	0.98	0.94	1.31
CM015574.1_RaGOO	4200000	43054107	1	4	0.0000	30	23	0.98	0.94	1.32
CM015574.1_RaGOO	4250000	43054107	1	0	0.0000	30	24	0.95	0.96	1.25
CM015574.1_RaGOO	4300000	43054107	1	0	0.0000	32	26	1.04	1.04	1.25
CM015574.1_RaGOO	4350000	43054107	2	1	0.0000	30	23	0.98	0.95	1.29
CM015574.1_RaGOO	4400000	43054107	0	1	0.0000	33	26	1.08	1.07	1.27
CM015574.1_RaGOO	4450000	43054107	1	1	0.0000	34	26	1.09	1.07	1.29
CM015574.1_RaGOO	4500000	43054107	7	0	0.0000	31	24	0.99	0.99	1.27
CM015574.1_RaGOO	4550000	43054107	0	0	0.0000	32	24	1.03	0.99	1.32
CM015574.1_RaGOO	4600000	43054107	0	5	0.0000	30	24	0.97	0.98	1.25
CM015574.1_RaGOO	4650000	43054107	0	0	0.0000	32	26	1.05	1.06	1.25
CM015574.1_RaGOO	4700000	43054107	0	3	0.0000	56	47	1.82	1.90	1.21
CM015574.1_RaGOO	4750000	43054107	0	0	0.0000	33	26	1.05	1.06	1.24
CM015574.1_RaGOO	4800000	43054107	2	8	0.0000	31	23	0.99	0.94	1.32
CM015574.1_RaGOO	4850000	43054107	1	7	0.0000	31	25	1.01	1.02	1.25
CM015574.1_RaGOO	4900000	43054107	1	1	0.0000	33	27	1.06	1.08	1.23
CM015574.1_RaGOO	4950000	43054107	9	0	0.0000	32	26	1.04	1.04	1.26
CM015574.1_RaGOO	5000000	43054107	1	1	0.0000	32	25	1.04	1.02	1.29
CM015574.1_RaGOO	5050000	43054107	0	3	0.0000	29	24	0.94	0.97	1.22
CM015574.1_RaGOO	5100000	43054107	0	1	0.0000	33	26	1.08	1.06	1.28
CM015574.1_RaGOO	5150000	43054107	0	0	0.0000	30	24	0.95	0.96	1.26
CM015574.1_RaGOO	5200000	43054107	2	0	0.0000	31	23	1.01	0.95	1.35
CM015574.1_RaGOO	5250000	43054107	4	0	0.0000	30	24	0.98	0.97	1.27
CM015574.1_RaGOO	5300000	43054107	2	2	0.0000	25	21	0.81	0.84	1.22
CM015574.1_RaGOO	5350000	43054107	2	1	0.0000	28	22	0.89	0.88	1.27
CM015574.1_RaGOO	5400000	43054107	3	0	0.0000	31	25	1.00	1.02	1.24
CM015574.1_RaGOO	5450000	43054107	0	0	0.0000	29	23	0.95	0.92	1.29
CM015574.1_RaGOO	5500000	43054107	8	0	0.0000	33	25	1.05	1.02	1.30
CM015574.1_RaGOO	5550000	43054107	1	1	0.0000	29	24	0.94	0.97	1.22
CM015574.1_RaGOO	5600000	43054107	0	3	0.0000	29	24	0.92	0.96	1.21
CM015574.1_RaGOO	5650000	43054107	1	3	0.0000	30	23	0.95	0.94	1.28
CM015574.1_RaGOO	5700000	43054107	1	0	0.0000	32	26	1.03	1.04	1.25
CM015574.1_RaGOO	5750000	43054107	2	0	0.0000	30	24	0.98	0.98	1.25
CM015574.1_RaGOO	5800000	43054107	1	0	0.0000	32	25	1.02	1.00	1.28
CM015574.1_RaGOO	5850000	43054107	1	2	0.0000	30	24	0.98	0.98	1.26
CM015574.1_RaGOO	5900000	43054107	2	0	0.0000	30	24	0.95	0.98	1.23
CM015574.1_RaGOO	5950000	43054107	0	0	0.0000	32	26	1.02	1.04	1.24
CM015574.1_RaGOO	6000000	43054107	1	0	0.0000	32	26	1.05	1.07	1.24
CM015574.1_RaGOO	6050000	43054107	1	1	0.0000	31	25	1.01	1.03	1.24
CM015574.1_RaGOO	6100000	43054107	5	0	0.0000	31	25	0.99	1.02	1.22
CM015574.1_RaGOO	6150000	43054107	4	1	0.0000	32	25	1.02	1.04	1.25
CM015574.1_RaGOO	6200000	43054107	1	0	0.0000	28	23	0.90	0.93	1.22
CM015574.1_RaGOO	6250000	43054107	2	7	0.0000	32	25	1.03	1.01	1.28
CM015574.1_RaGOO	6300000	43054107	3	3	0.0000	27	22	0.88	0.89	1.24
CM015574.1_RaGOO	6350000	43054107	3	2	0.0000	32	24	1.02	0.99	1.30
CM015574.1_RaGOO	6400000	43054107	0	1	0.0000	31	24	0.99	0.96	1.29
CM015574.1_RaGOO	6450000	43054107	3	8	0.0000	29	23	0.94	0.95	1.25
CM015574.1_RaGOO	6500000	43054107	2	0	0.0000	31	24	1.01	0.99	1.28
CM015574.1_RaGOO	6550000	43054107	0	0	0.0000	33	26	1.06	1.05	1.28
CM015574.1_RaGOO	6600000	43054107	0	2	0.0000	29	23	0.94	0.92	1.28
CM015574.1_RaGOO	6650000	43054107	0	0	0.0000	29	23	0.92	0.94	1.24
CM015574.1_RaGOO	6700000	43054107	0	0	0.0000	29	23	0.94	0.95	1.24
CM015574.1_RaGOO	6750000	43054107	4	6	0.0000	28	23	0.92	0.92	1.26
CM015574.1_RaGOO	6800000	43054107	2	0	0.0000	34	26	1.08	1.06	1.29
CM015574.1_RaGOO	6850000	43054107	2	0	0.0000	33	24	1.05	0.99	1.34
CM015574.1_RaGOO	6900000	43054107	0	0	0.0000	31	23	0.99	0.95	1.31
CM015574.1_RaGOO	6950000	43054107	3	0	0.0000	30	23	0.97	0.95	1.28
CM015574.1_RaGOO	7000000	43054107	0	1	0.0000	32	25	1.04	1.03	1.27
CM015574.1_RaGOO	7050000	43054107	2	4	0.0000	31	24	1.00	0.97	1.29
CM015574.1_RaGOO	7100000	43054107	0	3	0.0000	31	25	1.01	1.01	1.26
CM015574.1_RaGOO	7150000	43054107	9	2	0.0000	31	23	1.00	0.95	1.33
CM015574.1_RaGOO	7200000	43054107	4	1	0.0000	31	24	1.00	0.97	1.30
CM015574.1_RaGOO	7250000	43054107	1	3	0.0000	32	24	1.03	0.99	1.31
CM015574.1_RaGOO	7300000	43054107	4	3	0.0000	31	24	1.00	0.97	1.29
CM015574.1_RaGOO	7350000	43054107	1	0	0.0000	31	25	1.01	1.00	1.28
CM015574.1_RaGOO	7400000	43054107	0	0	0.0000	33	25	1.05	1.03	1.29
CM015574.1_RaGOO	7450000	43054107	2	5	0.0000	33	26	1.07	1.05	1.29
CM015574.1_RaGOO	7500000	43054107	0	0	0.0000	31	25	1.01	1.02	1.25
CM015574.1_RaGOO	7550000	43054107	0	1	0.0000	29	24	0.95	0.96	1.25
CM015574.1_RaGOO	7600000	43054107	0	0	0.0000	28	23	0.91	0.93	1.22
CM015574.1_RaGOO	7650000	43054107	0	1	0.0000	27	21	0.88	0.86	1.29
CM015574.1_RaGOO	7700000	43054107	0	0	0.0000	27	22	0.87	0.88	1.24
CM015574.1_RaGOO	7750000	43054107	0	0	0.0000	27	21	0.87	0.86	1.28
CM015574.1_RaGOO	7800000	43054107	0	2	0.0000	29	23	0.95	0.93	1.28
CM015574.1_RaGOO	7850000	43054107	2	0	0.0000	34	27	1.08	1.09	1.25
CM015574.1_RaGOO	7900000	43054107	0	0	0.0000	32	25	1.03	1.02	1.28
CM015574.1_RaGOO	7950000	43054107	0	0	0.0000	30	24	0.98	0.99	1.24
CM015574.1_RaGOO	8000000	43054107	1	1	0.0000	29	23	0.95	0.94	1.26
CM015574.1_RaGOO	8050000	43054107	1	0	0.0000	31	25	1.01	1.03	1.24
CM015574.1_RaGOO	8100000	43054107	1	2	0.0000	29	22	0.93	0.91	1.29
CM015574.1_RaGOO	8150000	43054107	1	0	0.0000	25	21	0.80	0.85	1.19
CM015574.1_RaGOO	8200000	43054107	1	0	0.0000	30	23	0.98	0.93	1.33
CM015574.1_RaGOO	8250000	43054107	1	4	0.0000	29	22	0.92	0.89	1.31
CM015574.1_RaGOO	8300000	43054107	2	2	0.0000	32	25	1.02	1.01	1.27
CM015574.1_RaGOO	8350000	43054107	2	1	0.0000	29	23	0.92	0.92	1.26
CM015574.1_RaGOO	8400000	43054107	1	2	0.0000	30	24	0.96	0.96	1.27
CM015574.1_RaGOO	8450000	43054107	0	0	0.0000	29	24	0.95	0.97	1.22
CM015574.1_RaGOO	8500000	43054107	0	1	0.0000	30	24	0.97	0.96	1.26
CM015574.1_RaGOO	8550000	43054107	0	0	0.0000	31	25	0.99	1.03	1.21
CM015574.1_RaGOO	8600000	43054107	0	0	0.0000	34	27	1.10	1.09	1.27
CM015574.1_RaGOO	8650000	43054107	0	3	0.0000	31	24	0.99	0.97	1.28
CM015574.1_RaGOO	8700000	43054107	0	1	0.0000	28	23	0.91	0.94	1.23
CM015574.1_RaGOO	8750000	43054107	7	0	0.0000	33	26	1.06	1.05	1.27
CM015574.1_RaGOO	8800000	43054107	6	5	0.0000	31	25	1.00	1.02	1.24
CM015574.1_RaGOO	8850000	43054107	21	0	0.0000	32	25	1.05	1.02	1.29
CM015574.1_RaGOO	8900000	43054107	0	2	0.0000	29	23	0.95	0.95	1.26
CM015574.1_RaGOO	8950000	43054107	0	4	0.0000	32	25	1.02	1.02	1.26
CM015574.1_RaGOO	9000000	43054107	2	2	0.0000	33	27	1.07	1.08	1.24
CM015574.1_RaGOO	9050000	43054107	2	1	0.0000	33	27	1.07	1.10	1.23
CM015574.1_RaGOO	9100000	43054107	1	0	0.0000	33	25	1.05	1.02	1.29
CM015574.1_RaGOO	9150000	43054107	9	2	0.0000	31	25	1.00	1.02	1.24
CM015574.1_RaGOO	9200000	43054107	2	1	0.0000	31	25	0.98	1.01	1.23
CM015574.1_RaGOO	9250000	43054107	0	2	0.0000	30	24	0.98	0.96	1.29
CM015574.1_RaGOO	9300000	43054107	0	1	0.0000	29	23	0.94	0.94	1.25
CM015574.1_RaGOO	9350000	43054107	5	0	0.0000	28	22	0.90	0.88	1.29
CM015574.1_RaGOO	9400000	43054107	0	0	0.0000	51	40	1.63	1.64	1.26
CM015574.1_RaGOO	9450000	43054107	0	2	0.0000	33	26	1.07	1.05	1.29
CM015574.1_RaGOO	9500000	43054107	0	0	0.0000	31	24	1.01	0.99	1.29
CM015574.1_RaGOO	9550000	43054107	3	6	0.0000	31	25	0.99	1.01	1.23
CM015574.1_RaGOO	9600000	43054107	0	5	0.0000	31	24	0.99	0.97	1.29
CM015574.1_RaGOO	9650000	43054107	0	2	0.0000	29	24	0.94	0.96	1.23
CM015574.1_RaGOO	9700000	43054107	0	1	0.0000	32	25	1.03	1.00	1.30
CM015574.1_RaGOO	9750000	43054107	4	2	0.0000	30	24	0.98	0.96	1.28
CM015574.1_RaGOO	9800000	43054107	2	1	0.0000	31	24	1.00	0.98	1.29
CM015574.1_RaGOO	9850000	43054107	1	2	0.0000	32	25	1.04	1.02	1.28
CM015574.1_RaGOO	9900000	43054107	1	1	0.0000	34	26	1.10	1.08	1.28
CM015574.1_RaGOO	9950000	43054107	1	0	0.0000	33	27	1.07	1.12	1.20
CM015574.1_RaGOO	10000000	43054107	2	0	0.0000	29	23	0.95	0.95	1.25
CM015574.1_RaGOO	10050000	43054107	0	12	0.0000	29	23	0.94	0.92	1.29
CM015574.1_RaGOO	10100000	43054107	2	0	0.0000	28	21	0.90	0.86	1.31
CM015574.1_RaGOO	10150000	43054107	1	2	0.0000	30	23	0.95	0.93	1.29
CM015574.1_RaGOO	10200000	43054107	0	0	0.0000	29	23	0.94	0.92	1.29
CM015574.1_RaGOO	10250000	43054107	0	0	0.0000	29	22	0.92	0.89	1.30
CM015574.1_RaGOO	10300000	43054107	0	0	0.0000	29	23	0.94	0.94	1.27
CM015574.1_RaGOO	10350000	43054107	0	2	0.0000	27	22	0.88	0.88	1.26
CM015574.1_RaGOO	10400000	43054107	0	0	0.0000	28	21	0.89	0.86	1.30
CM015574.1_RaGOO	10450000	43054107	0	0	0.0000	30	23	0.96	0.92	1.31
CM015574.1_RaGOO	10500000	43054107	0	0	0.0000	32	26	1.02	1.04	1.23
CM015574.1_RaGOO	10550000	43054107	4	0	0.0000	28	23	0.89	0.93	1.21
CM015574.1_RaGOO	10600000	43054107	1	1	0.0000	29	22	0.95	0.91	1.32
CM015574.1_RaGOO	10650000	43054107	1	1	0.0000	30	23	0.97	0.93	1.32
CM015574.1_RaGOO	10700000	43054107	1	0	0.0000	28	23	0.91	0.93	1.23
CM015574.1_RaGOO	10750000	43054107	1	13	0.0000	28	23	0.91	0.93	1.25
CM015574.1_RaGOO	10800000	43054107	1	0	0.0000	29	23	0.93	0.95	1.24
CM015574.1_RaGOO	10850000	43054107	0	0	0.0000	29	22	0.93	0.91	1.29
CM015574.1_RaGOO	10900000	43054107	1	1	0.0000	27	22	0.88	0.90	1.22
CM015574.1_RaGOO	10950000	43054107	0	7	0.0000	26	21	0.82	0.85	1.22
CM015574.1_RaGOO	11000000	43054107	1	2	0.0000	28	22	0.89	0.90	1.24
CM015574.1_RaGOO	11050000	43054107	0	0	0.0000	31	25	0.99	1.01	1.23
CM015574.1_RaGOO	11100000	43054107	4	0	0.0000	28	22	0.89	0.91	1.23
CM015574.1_RaGOO	11150000	43054107	2	7	0.0000	27	22	0.87	0.88	1.23
CM015574.1_RaGOO	11200000	43054107	2	0	0.0000	27	22	0.87	0.88	1.25
CM015574.1_RaGOO	11250000	43054107	0	1	0.0000	27	21	0.88	0.86	1.28
CM015574.1_RaGOO	11300000	43054107	1	0	0.0000	26	20	0.85	0.83	1.30
CM015574.1_RaGOO	11350000	43054107	0	2	0.0000	28	22	0.92	0.91	1.27
CM015574.1_RaGOO	11400000	43054107	0	0	0.0000	27	21	0.87	0.87	1.26
CM015574.1_RaGOO	11450000	43054107	2	0	0.0000	28	22	0.89	0.91	1.23
CM015574.1_RaGOO	11500000	43054107	1	0	0.0000	30	24	0.98	0.98	1.26
CM015574.1_RaGOO	11550000	43054107	0	1	0.0000	32	24	1.05	0.99	1.34
CM015574.1_RaGOO	11600000	43054107	0	0	0.0000	31	25	0.99	1.00	1.24
CM015574.1_RaGOO	11650000	43054107	0	2	0.0000	32	26	1.03	1.05	1.24
CM015574.1_RaGOO	11700000	43054107	0	2	0.0000	30	24	0.96	0.96	1.26
CM015574.1_RaGOO	11750000	43054107	1	0	0.0000	33	25	1.06	1.04	1.29
CM015574.1_RaGOO	11800000	43054107	2	1	0.0000	33	27	1.07	1.09	1.23
CM015574.1_RaGOO	11850000	43054107	1	0	0.0000	31	25	1.02	1.02	1.25
CM015574.1_RaGOO	11900000	43054107	0	0	0.0000	30	24	0.98	0.99	1.24
CM015574.1_RaGOO	11950000	43054107	1	1	0.0000	31	24	1.01	0.98	1.30
CM015574.1_RaGOO	12000000	43054107	3	8	0.0000	30	24	0.97	0.97	1.26
CM015574.1_RaGOO	12050000	43054107	0	0	0.0000	30	24	0.96	0.98	1.24
CM015574.1_RaGOO	12100000	43054107	3	2	0.0000	32	25	1.02	1.00	1.28
CM015574.1_RaGOO	12150000	43054107	1	1	0.0000	31	25	0.99	1.01	1.24
CM015574.1_RaGOO	12200000	43054107	0	6	0.0000	32	26	1.02	1.05	1.23
CM015574.1_RaGOO	12250000	43054107	2	4	0.0000	32	24	1.03	0.99	1.31
CM015574.1_RaGOO	12300000	43054107	10	2	0.0000	32	26	1.02	1.05	1.22
CM015574.1_RaGOO	12350000	43054107	3	1	0.0000	33	25	1.06	1.01	1.32
CM015574.1_RaGOO	12400000	43054107	0	0	0.0000	31	25	1.00	1.03	1.22
CM015574.1_RaGOO	12450000	43054107	0	0	0.0000	32	26	1.02	1.05	1.23
CM015574.1_RaGOO	12500000	43054107	0	0	0.0000	29	23	0.94	0.92	1.30
CM015574.1_RaGOO	12550000	43054107	0	6	0.0000	27	22	0.88	0.89	1.24
CM015574.1_RaGOO	12600000	43054107	0	0	0.0000	31	25	1.02	1.02	1.25
CM015574.1_RaGOO	12650000	43054107	0	2	0.0000	31	24	0.99	0.98	1.27
CM015574.1_RaGOO	12700000	43054107	0	0	0.0000	31	24	0.99	0.99	1.25
CM015574.1_RaGOO	12750000	43054107	7	6	0.0000	32	26	1.05	1.05	1.26
CM015574.1_RaGOO	12800000	43054107	0	8	0.0000	31	25	1.02	1.01	1.26
CM015574.1_RaGOO	12850000	43054107	3	1	0.0000	32	24	1.02	0.99	1.30
CM015574.1_RaGOO	12900000	43054107	1	0	0.0000	30	23	0.98	0.94	1.31
CM015574.1_RaGOO	12950000	43054107	0	0	0.0000	32	25	1.02	1.01	1.28
CM015574.1_RaGOO	13000000	43054107	0	0	0.0000	32	25	1.05	1.01	1.30
CM015574.1_RaGOO	13050000	43054107	1	1	0.0000	31	25	1.00	1.02	1.23
CM015574.1_RaGOO	13100000	43054107	1	0	0.0000	28	23	0.90	0.92	1.25
CM015574.1_RaGOO	13150000	43054107	6	0	0.0000	31	25	1.00	1.01	1.25
CM015574.1_RaGOO	13200000	43054107	0	3	0.0000	29	23	0.95	0.92	1.30
CM015574.1_RaGOO	13250000	43054107	1	11	0.0000	31	25	0.99	1.02	1.22
CM015574.1_RaGOO	13300000	43054107	0	3	0.0000	31	24	1.00	0.98	1.28
CM015574.1_RaGOO	13350000	43054107	0	0	0.0000	32	26	1.02	1.04	1.24
CM015574.1_RaGOO	13400000	43054107	0	1	0.0000	30	25	0.95	1.01	1.19
CM015574.1_RaGOO	13450000	43054107	9	0	0.0000	31	24	0.99	1.00	1.26
CM015574.1_RaGOO	13500000	43054107	1	0	0.0000	32	25	1.04	1.02	1.28
CM015574.1_RaGOO	13550000	43054107	0	8	0.0000	32	24	1.02	0.99	1.30
CM015574.1_RaGOO	13600000	43054107	0	2	0.0000	29	23	0.94	0.92	1.30
CM015574.1_RaGOO	13650000	43054107	3	0	0.0000	28	23	0.92	0.93	1.25
CM015574.1_RaGOO	13700000	43054107	1	1	0.0000	28	22	0.89	0.88	1.28
CM015574.1_RaGOO	13750000	43054107	5	0	0.0000	28	23	0.89	0.92	1.21
CM015574.1_RaGOO	13800000	43054107	3	3	0.0000	27	21	0.88	0.87	1.27
CM015574.1_RaGOO	13850000	43054107	1	5	0.0000	29	23	0.94	0.94	1.26
CM015574.1_RaGOO	13900000	43054107	0	1	0.0000	29	23	0.93	0.92	1.27
CM015574.1_RaGOO	13950000	43054107	2	0	0.0000	31	25	1.00	1.01	1.24
CM015574.1_RaGOO	14000000	43054107	8	14	0.0000	31	24	0.99	0.99	1.27
CM015574.1_RaGOO	14050000	43054107	0	0	0.0000	30	24	0.98	0.97	1.27
CM015574.1_RaGOO	14100000	43054107	1	34	0.0000	27	21	0.87	0.86	1.27
CM015574.1_RaGOO	14150000	43054107	1	6	0.0000	33	26	1.08	1.06	1.28
CM015574.1_RaGOO	14200000	43054107	1	1	0.0000	31	25	1.01	1.01	1.26
CM015574.1_RaGOO	14250000	43054107	0	0	0.0000	33	25	1.07	1.03	1.31
CM015574.1_RaGOO	14300000	43054107	0	0	0.0000	37	30	1.20	1.21	1.25
CM015574.1_RaGOO	14350000	43054107	0	0	0.0000	28	22	0.91	0.89	1.29
CM015574.1_RaGOO	14400000	43054107	0	2	0.0000	29	23	0.94	0.93	1.28
CM015574.1_RaGOO	14450000	43054107	0	0	0.0000	29	23	0.92	0.93	1.25
CM015574.1_RaGOO	14500000	43054107	3	1	0.0000	28	23	0.90	0.92	1.24
CM015574.1_RaGOO	14550000	43054107	5	0	0.0000	29	23	0.94	0.92	1.28
CM015574.1_RaGOO	14600000	43054107	0	2	0.0000	31	25	1.01	1.03	1.24
CM015574.1_RaGOO	14650000	43054107	2	0	0.0000	33	27	1.08	1.10	1.24
CM015574.1_RaGOO	14700000	43054107	1	0	0.0000	26	22	0.85	0.88	1.22
CM015574.1_RaGOO	14750000	43054107	0	2	0.0000	27	21	0.86	0.87	1.25
CM015574.1_RaGOO	14800000	43054107	0	0	0.0000	29	22	0.93	0.91	1.29
CM015574.1_RaGOO	14850000	43054107	1	0	0.0000	29	24	0.94	0.96	1.24
CM015574.1_RaGOO	14900000	43054107	0	0	0.0000	30	24	0.98	0.99	1.25
CM015574.1_RaGOO	14950000	43054107	1	1	0.0000	31	25	0.98	1.00	1.24
CM015574.1_RaGOO	15000000	43054107	3	3	0.0000	31	25	1.01	1.01	1.26
CM015574.1_RaGOO	15050000	43054107	1	0	0.0000	31	25	1.00	1.02	1.25
CM015574.1_RaGOO	15100000	43054107	1	0	0.0000	30	22	0.96	0.91	1.33
CM015574.1_RaGOO	15150000	43054107	1	0	0.0000	31	25	0.99	1.01	1.24
CM015574.1_RaGOO	15200000	43054107	4	2	0.0000	28	22	0.91	0.89	1.29
CM015574.1_RaGOO	15250000	43054107	0	3	0.0000	30	23	0.97	0.95	1.28
CM015574.1_RaGOO	15300000	43054107	0	4	0.0000	27	21	0.86	0.87	1.25
CM015574.1_RaGOO	15350000	43054107	2	0	0.0000	29	23	0.94	0.95	1.24
CM015574.1_RaGOO	15400000	43054107	1	0	0.0000	29	22	0.94	0.90	1.32
CM015574.1_RaGOO	15450000	43054107	4	1	0.0000	29	24	0.94	0.96	1.23
CM015574.1_RaGOO	15500000	43054107	1	0	0.0000	31	25	0.99	1.00	1.26
CM015574.1_RaGOO	15550000	43054107	0	1	0.0000	30	23	0.95	0.94	1.27
CM015574.1_RaGOO	15600000	43054107	0	0	0.0000	31	25	1.00	1.03	1.22
CM015574.1_RaGOO	15650000	43054107	1	0	0.0000	34	26	1.08	1.04	1.31
CM015574.1_RaGOO	15700000	43054107	0	0	0.0000	35	27	1.12	1.10	1.28
CM015574.1_RaGOO	15750000	43054107	1	5	0.0000	30	24	0.95	0.97	1.24
CM015574.1_RaGOO	15800000	43054107	3	0	0.0000	31	24	1.00	0.96	1.31
CM015574.1_RaGOO	15850000	43054107	5	1	0.0000	29	24	0.94	0.96	1.24
CM015574.1_RaGOO	15900000	43054107	1	3	0.0000	30	24	0.97	0.97	1.26
CM015574.1_RaGOO	15950000	43054107	0	0	0.0000	29	24	0.94	0.98	1.21
CM015574.1_RaGOO	16000000	43054107	0	0	0.0000	30	23	0.96	0.93	1.30
CM015574.1_RaGOO	16050000	43054107	0	1	0.0000	29	23	0.94	0.94	1.26
CM015574.1_RaGOO	16100000	43054107	0	0	0.0000	33	25	1.05	1.03	1.28
CM015574.1_RaGOO	16150000	43054107	0	0	0.0000	29	23	0.94	0.93	1.27
CM015574.1_RaGOO	16200000	43054107	1	0	0.0000	28	21	0.90	0.86	1.31
CM015574.1_RaGOO	16250000	43054107	2	1	0.0000	28	23	0.91	0.94	1.22
CM015574.1_RaGOO	16300000	43054107	0	0	0.0000	28	22	0.91	0.91	1.26
CM015574.1_RaGOO	16350000	43054107	0	2	0.0000	32	25	1.03	1.01	1.29
CM015574.1_RaGOO	16400000	43054107	0	0	0.0000	31	24	1.01	0.97	1.31
CM015574.1_RaGOO	16450000	43054107	0	0	0.0000	31	24	1.01	0.97	1.32
CM015574.1_RaGOO	16500000	43054107	0	1	0.0000	28	23	0.92	0.94	1.23
CM015574.1_RaGOO	16550000	43054107	0	1	0.0000	30	24	0.98	0.97	1.27
CM015574.1_RaGOO	16600000	43054107	2	0	0.0000	30	24	0.96	0.97	1.25
CM015574.1_RaGOO	16650000	43054107	7	1	0.0000	27	22	0.88	0.90	1.24
CM015574.1_RaGOO	16700000	43054107	1	1	0.0000	31	24	1.01	0.96	1.32
CM015574.1_RaGOO	16750000	43054107	4	5	0.0000	29	23	0.92	0.92	1.26
CM015574.1_RaGOO	16800000	43054107	0	10	0.0000	32	26	1.04	1.06	1.23
CM015574.1_RaGOO	16850000	43054107	0	4	0.0000	31	24	0.99	0.98	1.27
CM015574.1_RaGOO	16900000	43054107	0	2	0.0000	28	22	0.91	0.88	1.30
CM015574.1_RaGOO	16950000	43054107	2	6	0.0000	29	23	0.93	0.92	1.26
CM015574.1_RaGOO	17000000	43054107	0	0	0.0000	28	23	0.91	0.92	1.25
CM015574.1_RaGOO	17050000	43054107	1	2	0.0000	31	24	1.00	0.99	1.27
CM015574.1_RaGOO	17100000	43054107	0	2	0.0000	28	22	0.91	0.90	1.26
CM015574.1_RaGOO	17150000	43054107	1	2	0.0000	30	23	0.97	0.93	1.31
CM015574.1_RaGOO	17200000	43054107	1	2	0.0000	31	25	0.99	1.00	1.25
CM015574.1_RaGOO	17250000	43054107	1	6	0.0000	28	22	0.92	0.91	1.26
CM015574.1_RaGOO	17300000	43054107	0	0	0.0000	28	22	0.91	0.91	1.26
CM015574.1_RaGOO	17350000	43054107	1	1	0.0000	29	24	0.93	0.96	1.22
CM015574.1_RaGOO	17400000	43054107	2	0	0.0000	27	21	0.86	0.87	1.24
CM015574.1_RaGOO	17450000	43054107	0	1	0.0000	27	22	0.86	0.91	1.20
CM015574.1_RaGOO	17500000	43054107	0	0	0.0000	28	23	0.91	0.92	1.24
CM015574.1_RaGOO	17550000	43054107	1	11	0.0000	29	23	0.93	0.92	1.26
CM015574.1_RaGOO	17600000	43054107	0	1	0.0000	29	24	0.95	0.98	1.21
CM015574.1_RaGOO	17650000	43054107	9	2	0.0000	26	21	0.83	0.85	1.23
CM015574.1_RaGOO	17700000	43054107	0	6	0.0000	28	22	0.89	0.90	1.24
CM015574.1_RaGOO	17750000	43054107	0	0	0.0000	28	22	0.91	0.91	1.26
CM015574.1_RaGOO	17800000	43054107	0	0	0.0000	29	22	0.92	0.91	1.28
CM015574.1_RaGOO	17850000	43054107	1	5	0.0000	31	24	1.00	0.96	1.32
CM015574.1_RaGOO	17900000	43054107	0	2	0.0000	28	22	0.89	0.89	1.27
CM015574.1_RaGOO	17950000	43054107	0	4	0.0000	23	18	0.74	0.74	1.25
CM015574.1_RaGOO	18000000	43054107	1	12	0.0000	27	21	0.88	0.86	1.30
CM015574.1_RaGOO	18050000	43054107	0	1	0.0000	28	22	0.90	0.90	1.27
CM015574.1_RaGOO	18100000	43054107	0	0	0.0000	28	22	0.89	0.88	1.27
CM015574.1_RaGOO	18150000	43054107	0	0	0.0000	29	23	0.94	0.94	1.26
CM015574.1_RaGOO	18200000	43054107	4	0	0.0000	29	23	0.94	0.92	1.28
CM015574.1_RaGOO	18250000	43054107	0	0	0.0000	28	22	0.91	0.91	1.26
CM015574.1_RaGOO	18300000	43054107	4	0	0.0000	28	22	0.90	0.90	1.26
CM015574.1_RaGOO	18350000	43054107	6	1	0.0000	25	21	0.81	0.84	1.22
CM015574.1_RaGOO	18400000	43054107	6	1	0.0000	27	22	0.87	0.88	1.24
CM015574.1_RaGOO	18450000	43054107	0	2	0.0000	28	22	0.91	0.89	1.30
CM015574.1_RaGOO	18500000	43054107	0	2	0.0000	29	23	0.94	0.92	1.30
CM015574.1_RaGOO	18550000	43054107	1	0	0.0000	27	22	0.88	0.89	1.24
CM015574.1_RaGOO	18600000	43054107	0	0	0.0000	29	23	0.95	0.93	1.29
CM015574.1_RaGOO	18650000	43054107	0	1	0.0000	27	21	0.86	0.87	1.25
CM015574.1_RaGOO	18700000	43054107	1	1	0.0000	30	24	0.98	0.98	1.26
CM015574.1_RaGOO	18750000	43054107	0	1	0.0000	28	23	0.91	0.92	1.26
CM015574.1_RaGOO	18800000	43054107	1	1	0.0000	41	34	1.33	1.37	1.23
CM015574.1_RaGOO	18850000	43054107	0	0	0.0000	27	21	0.87	0.87	1.26
CM015574.1_RaGOO	18900000	43054107	1	0	0.0000	28	22	0.92	0.90	1.29
CM015574.1_RaGOO	18950000	43054107	1	0	0.0000	26	21	0.84	0.84	1.27
CM015574.1_RaGOO	19000000	43054107	1	0	0.0000	28	23	0.90	0.94	1.20
CM015574.1_RaGOO	19050000	43054107	2	0	0.0000	34	27	1.09	1.11	1.24
CM015574.1_RaGOO	19100000	43054107	0	1	0.0000	29	23	0.93	0.95	1.23
CM015574.1_RaGOO	19150000	43054107	1	2	0.0000	30	24	0.95	0.97	1.24
CM015574.1_RaGOO	19200000	43054107	1	0	0.0000	31	24	1.00	0.99	1.27
CM015574.1_RaGOO	19250000	43054107	14	0	0.0000	30	23	0.98	0.93	1.33
CM015574.1_RaGOO	19300000	43054107	2	1	0.0000	32	26	1.03	1.06	1.23
CM015574.1_RaGOO	19350000	43054107	1	1	0.0000	30	24	0.95	0.97	1.23
CM015574.1_RaGOO	19400000	43054107	0	0	0.0000	34	26	1.08	1.05	1.30
CM015574.1_RaGOO	19450000	43054107	0	1	0.0000	31	24	1.00	0.99	1.28
CM015574.1_RaGOO	19500000	43054107	0	3	0.0000	29	23	0.92	0.95	1.23
CM015574.1_RaGOO	19550000	43054107	0	1	0.0000	31	24	1.00	0.96	1.31
CM015574.1_RaGOO	19600000	43054107	1	0	0.0000	28	22	0.91	0.88	1.29
CM015574.1_RaGOO	19650000	43054107	1	0	0.0000	31	24	0.99	0.99	1.25
CM015574.1_RaGOO	19700000	43054107	3	4	0.0000	32	24	1.02	0.97	1.33
CM015574.1_RaGOO	19750000	43054107	0	1	0.0000	28	22	0.89	0.91	1.23
CM015574.1_RaGOO	19800000	43054107	2	0	0.0000	31	24	1.01	0.97	1.31
CM015574.1_RaGOO	19850000	43054107	1	0	0.0000	30	24	0.96	0.97	1.25
CM015574.1_RaGOO	19900000	43054107	3	0	0.0000	31	24	1.01	0.98	1.30
CM015574.1_RaGOO	19950000	43054107	0	0	0.0000	29	22	0.93	0.90	1.30
CM015574.1_RaGOO	20000000	43054107	0	4	0.0000	29	24	0.95	0.99	1.21
CM015574.1_RaGOO	20050000	43054107	0	15	0.0000	31	25	1.01	1.03	1.24
CM015574.1_RaGOO	20100000	43054107	0	0	0.0000	29	25	0.94	1.00	1.19
CM015574.1_RaGOO	20150000	43054107	1	0	0.0000	28	23	0.91	0.92	1.26
CM015574.1_RaGOO	20200000	43054107	1	0	0.0000	31	24	0.98	0.99	1.26
CM015574.1_RaGOO	20250000	43054107	1	3	0.0000	28	23	0.91	0.93	1.24
CM015574.1_RaGOO	20300000	43054107	0	0	0.0000	32	26	1.04	1.06	1.24
CM015574.1_RaGOO	20350000	43054107	1	0	0.0000	29	23	0.93	0.92	1.28
CM015574.1_RaGOO	20400000	43054107	0	0	0.0000	29	23	0.95	0.94	1.27
CM015574.1_RaGOO	20450000	43054107	0	0	0.0000	28	22	0.91	0.89	1.28
CM015574.1_RaGOO	20500000	43054107	0	4	0.0000	30	24	0.98	0.98	1.25
CM015574.1_RaGOO	20550000	43054107	0	3	0.0000	30	23	0.96	0.94	1.28
CM015574.1_RaGOO	20600000	43054107	0	2	0.0000	30	23	0.96	0.96	1.27
CM015574.1_RaGOO	20650000	43054107	0	1	0.0000	27	22	0.87	0.88	1.24
CM015574.1_RaGOO	20700000	43054107	0	1	0.0000	29	23	0.94	0.94	1.25
CM015574.1_RaGOO	20750000	43054107	5	1	0.0000	29	23	0.93	0.93	1.26
CM015574.1_RaGOO	20800000	43054107	0	0	0.0000	30	23	0.98	0.95	1.29
CM015574.1_RaGOO	20850000	43054107	1	1	0.0000	29	22	0.92	0.89	1.30
CM015574.1_RaGOO	20900000	43054107	2	8	0.0000	30	24	0.96	0.96	1.25
CM015574.1_RaGOO	20950000	43054107	1	3	0.0000	31	24	0.99	0.96	1.30
CM015574.1_RaGOO	21000000	43054107	0	0	0.0000	31	25	0.99	1.01	1.24
CM015574.1_RaGOO	21050000	43054107	0	0	0.0000	30	25	0.98	1.00	1.23
CM015574.1_RaGOO	21100000	43054107	0	0	0.0000	31	24	1.00	1.00	1.27
CM015574.1_RaGOO	21150000	43054107	0	3	0.0000	26	20	0.83	0.82	1.27
CM015574.1_RaGOO	21200000	43054107	0	2	0.0000	29	23	0.93	0.93	1.26
CM015574.1_RaGOO	21250000	43054107	2	1	0.0000	29	23	0.94	0.95	1.24
CM015574.1_RaGOO	21300000	43054107	3	1	0.0000	29	24	0.94	0.96	1.24
CM015574.1_RaGOO	21350000	43054107	0	1	0.0000	31	24	1.00	0.96	1.32
CM015574.1_RaGOO	21400000	43054107	0	0	0.0000	31	25	1.01	1.00	1.27
CM015574.1_RaGOO	21450000	43054107	3	0	0.0000	45	37	1.44	1.51	1.20
CM015574.1_RaGOO	21500000	43054107	0	0	0.0000	26	21	0.84	0.86	1.23
CM015574.1_RaGOO	21550000	43054107	0	0	0.0000	57	47	1.84	1.92	1.20
CM015574.1_RaGOO	21600000	43054107	0	0	0.0000	27	22	0.86	0.90	1.21
CM015574.1_RaGOO	21650000	43054107	1	0	0.0000	28	22	0.89	0.90	1.25
CM015574.1_RaGOO	21700000	43054107	0	0	0.0000	28	23	0.89	0.91	1.23
CM015574.1_RaGOO	21750000	43054107	13	66	0.0258	31	23	1.01	0.91	1.39
CM015574.1_RaGOO	21800000	43054107	25	0	0.0000	27	22	0.88	0.88	1.25
CM015574.1_RaGOO	21850000	43054107	0	0	0.0000	27	21	0.86	0.85	1.28
CM015574.1_RaGOO	21900000	43054107	0	0	0.0000	29	23	0.94	0.95	1.25
CM015574.1_RaGOO	21950000	43054107	0	0	0.0000	30	26	0.98	1.04	1.19
CM015574.1_RaGOO	22000000	43054107	0	1	0.0000	29	23	0.93	0.93	1.26
CM015574.1_RaGOO	22050000	43054107	0	0	0.0000	26	21	0.85	0.85	1.25
CM015574.1_RaGOO	22100000	43054107	0	0	0.0000	29	23	0.93	0.93	1.26
CM015574.1_RaGOO	22150000	43054107	3	0	0.0000	28	23	0.92	0.93	1.24
CM015574.1_RaGOO	22200000	43054107	0	0	0.0000	30	23	0.97	0.95	1.28
CM015574.1_RaGOO	22250000	43054107	2	0	0.0000	30	24	0.98	0.96	1.29
CM015574.1_RaGOO	22300000	43054107	0	0	0.0000	28	23	0.91	0.94	1.22
CM015574.1_RaGOO	22350000	43054107	0	1	0.0000	28	23	0.90	0.93	1.23
CM015574.1_RaGOO	22400000	43054107	2	0	0.0000	27	22	0.86	0.90	1.22
CM015574.1_RaGOO	22450000	43054107	0	0	0.0000	29	22	0.94	0.91	1.30
CM015574.1_RaGOO	22500000	43054107	0	0	0.0000	29	24	0.93	0.98	1.20
CM015574.1_RaGOO	22550000	43054107	1	0	0.0000	32	26	1.04	1.06	1.24
CM015574.1_RaGOO	22600000	43054107	0	0	0.0000	25	20	0.79	0.83	1.20
CM015574.1_RaGOO	22650000	43054107	3	0	0.0000	27	21	0.86	0.87	1.25
CM015574.1_RaGOO	22700000	43054107	1	0	0.0000	30	24	0.98	0.96	1.28
CM015574.1_RaGOO	22750000	43054107	1	0	0.0000	31	25	1.00	1.01	1.24
CM015574.1_RaGOO	22800000	43054107	0	0	0.0000	28	23	0.91	0.93	1.23
CM015574.1_RaGOO	22850000	43054107	1	1	0.0000	27	21	0.87	0.86	1.29
CM015574.1_RaGOO	22900000	43054107	2	1	0.0000	28	23	0.91	0.92	1.25
CM015574.1_RaGOO	22950000	43054107	1	0	0.0000	30	24	0.98	0.97	1.26
CM015574.1_RaGOO	23000000	43054107	1	0	0.0000	28	22	0.90	0.90	1.27
CM015574.1_RaGOO	23050000	43054107	5	0	0.0000	27	23	0.87	0.92	1.20
CM015574.1_RaGOO	23100000	43054107	1	0	0.0000	31	25	0.99	1.00	1.25
CM015574.1_RaGOO	23150000	43054107	0	0	0.0000	30	23	0.95	0.95	1.26
CM015574.1_RaGOO	23200000	43054107	0	0	0.0000	41	34	1.32	1.36	1.22
CM015574.1_RaGOO	23250000	43054107	1	0	0.0000	25	22	0.81	0.88	1.17
CM015574.1_RaGOO	23300000	43054107	0	1	0.0000	31	24	1.00	0.99	1.27
CM015574.1_RaGOO	23350000	43054107	0	0	0.0000	30	24	0.98	0.99	1.24
CM015574.1_RaGOO	23400000	43054107	3	0	0.0000	28	22	0.89	0.90	1.25
CM015574.1_RaGOO	23450000	43054107	1	0	0.0000	29	22	0.92	0.90	1.28
CM015574.1_RaGOO	23500000	43054107	0	2	0.0000	30	23	0.96	0.94	1.28
CM015574.1_RaGOO	23550000	43054107	0	0	0.0000	26	22	0.85	0.89	1.20
CM015574.1_RaGOO	23600000	43054107	0	0	0.0000	29	24	0.94	0.97	1.22
CM015574.1_RaGOO	23650000	43054107	0	0	0.0000	29	22	0.92	0.91	1.28
CM015574.1_RaGOO	23700000	43054107	0	1	0.0000	27	22	0.87	0.90	1.22
CM015574.1_RaGOO	23750000	43054107	0	2	0.0000	31	24	0.98	0.98	1.26
CM015574.1_RaGOO	23800000	43054107	1	1	0.0000	30	24	0.98	0.98	1.26
CM015574.1_RaGOO	23850000	43054107	0	2	0.0000	29	22	0.94	0.88	1.35
CM015574.1_RaGOO	23900000	43054107	3	0	0.0000	28	21	0.91	0.87	1.33
CM015574.1_RaGOO	23950000	43054107	0	4	0.0000	27	22	0.87	0.89	1.22
CM015574.1_RaGOO	24000000	43054107	0	0	0.0000	27	22	0.87	0.89	1.23
CM015574.1_RaGOO	24050000	43054107	2	3	0.0000	27	22	0.88	0.88	1.26
CM015574.1_RaGOO	24100000	43054107	0	0	0.0000	28	23	0.91	0.92	1.25
CM015574.1_RaGOO	24150000	43054107	0	2	0.0000	27	22	0.87	0.89	1.23
CM015574.1_RaGOO	24200000	43054107	0	0	0.0000	28	22	0.89	0.89	1.27
CM015574.1_RaGOO	24250000	43054107	0	1	0.0000	28	23	0.90	0.92	1.24
CM015574.1_RaGOO	24300000	43054107	3	0	0.0000	30	24	0.98	0.96	1.29
CM015574.1_RaGOO	24350000	43054107	0	0	0.0000	28	23	0.91	0.95	1.20
CM015574.1_RaGOO	24400000	43054107	0	0	0.0000	28	22	0.90	0.90	1.25
CM015574.1_RaGOO	24450000	43054107	0	0	0.0000	29	23	0.94	0.92	1.28
CM015574.1_RaGOO	24500000	43054107	1	1	0.0000	29	23	0.92	0.92	1.26
CM015574.1_RaGOO	24550000	43054107	0	1	0.0000	29	23	0.93	0.94	1.24
CM015574.1_RaGOO	24600000	43054107	0	0	0.0000	28	23	0.90	0.92	1.24
CM015574.1_RaGOO	24650000	43054107	0	1	0.0000	27	22	0.88	0.90	1.23
CM015574.1_RaGOO	24700000	43054107	0	0	0.0000	26	21	0.85	0.87	1.23
CM015574.1_RaGOO	24750000	43054107	1	0	0.0000	27	22	0.86	0.88	1.23
CM015574.1_RaGOO	24800000	43054107	0	0	0.0000	28	23	0.92	0.94	1.22
CM015574.1_RaGOO	24850000	43054107	1	0	0.0000	31	24	0.99	0.97	1.28
CM015574.1_RaGOO	24900000	43054107	3	0	0.0000	31	24	0.99	0.96	1.30
CM015574.1_RaGOO	24950000	43054107	9	0	0.0000	30	24	0.98	0.96	1.28
CM015574.1_RaGOO	25000000	43054107	0	0	0.0000	38	30	1.23	1.21	1.28
CM015574.1_RaGOO	25050000	43054107	4	2	0.0000	30	24	0.97	0.96	1.28
CM015574.1_RaGOO	25100000	43054107	1	1	0.0000	34	26	1.10	1.07	1.30
CM015574.1_RaGOO	25150000	43054107	3	0	0.0000	31	24	0.99	0.99	1.27
CM015574.1_RaGOO	25200000	43054107	1	1	0.0000	31	25	1.01	1.00	1.27
CM015574.1_RaGOO	25250000	43054107	0	0	0.0000	31	25	1.00	1.02	1.24
CM015574.1_RaGOO	25300000	43054107	0	0	0.0000	30	25	0.98	1.00	1.23
CM015574.1_RaGOO	25350000	43054107	1	1	0.0000	28	23	0.91	0.93	1.24
CM015574.1_RaGOO	25400000	43054107	4	1	0.0000	29	23	0.94	0.92	1.29
CM015574.1_RaGOO	25450000	43054107	1	0	0.0000	30	23	0.97	0.95	1.29
CM015574.1_RaGOO	25500000	43054107	1	4	0.0000	32	25	1.04	1.03	1.28
CM015574.1_RaGOO	25550000	43054107	4	0	0.0000	30	24	0.98	0.99	1.25
CM015574.1_RaGOO	25600000	43054107	6	4	0.0000	29	24	0.95	0.96	1.24
CM015574.1_RaGOO	25650000	43054107	8	0	0.0000	37	29	1.19	1.17	1.29
CM015574.1_RaGOO	25700000	43054107	2	0	0.0000	30	25	0.98	1.02	1.21
CM015574.1_RaGOO	25750000	43054107	0	2	0.0000	33	26	1.06	1.06	1.27
CM015574.1_RaGOO	25800000	43054107	0	9	0.0000	31	24	0.99	0.96	1.31
CM015574.1_RaGOO	25850000	43054107	2	0	0.0000	30	24	0.98	0.97	1.27
CM015574.1_RaGOO	25900000	43054107	1	8	0.0000	30	24	0.98	0.96	1.28
CM015574.1_RaGOO	25950000	43054107	0	1	0.0000	32	25	1.02	1.01	1.28
CM015574.1_RaGOO	26000000	43054107	1	2	0.0000	30	24	0.96	0.98	1.24
CM015574.1_RaGOO	26050000	43054107	0	0	0.0000	30	23	0.97	0.94	1.29
CM015574.1_RaGOO	26100000	43054107	0	2	0.0000	29	24	0.95	0.96	1.24
CM015574.1_RaGOO	26150000	43054107	0	2	0.0000	28	23	0.92	0.93	1.25
CM015574.1_RaGOO	26200000	43054107	3	1	0.0000	30	24	0.98	0.98	1.27
CM015574.1_RaGOO	26250000	43054107	0	0	0.0000	28	23	0.90	0.93	1.21
CM015574.1_RaGOO	26300000	43054107	2	0	0.0000	29	24	0.94	0.96	1.23
CM015574.1_RaGOO	26350000	43054107	2	0	0.0000	31	25	0.99	1.03	1.21
CM015574.1_RaGOO	26400000	43054107	0	3	0.0000	31	25	0.99	1.00	1.24
CM015574.1_RaGOO	26450000	43054107	0	0	0.0000	31	25	1.01	1.03	1.24
CM015574.1_RaGOO	26500000	43054107	2	0	0.0000	30	23	0.95	0.95	1.26
CM015574.1_RaGOO	26550000	43054107	0	0	0.0000	30	24	0.98	0.98	1.26
CM015574.1_RaGOO	26600000	43054107	2	0	0.0000	33	27	1.05	1.09	1.21
CM015574.1_RaGOO	26650000	43054107	14	4	0.0000	30	23	0.98	0.94	1.31
CM015574.1_RaGOO	26700000	43054107	0	0	0.0000	28	22	0.89	0.89	1.26
CM015574.1_RaGOO	26750000	43054107	0	0	0.0000	29	24	0.95	0.96	1.24
CM015574.1_RaGOO	26800000	43054107	0	11	0.0000	31	24	0.99	0.98	1.28
CM015574.1_RaGOO	26850000	43054107	0	4	0.0000	29	22	0.93	0.91	1.29
CM015574.1_RaGOO	26900000	43054107	0	0	0.0000	29	22	0.93	0.89	1.32
CM015574.1_RaGOO	26950000	43054107	2	1	0.0000	27	20	0.87	0.82	1.34
CM015574.1_RaGOO	27000000	43054107	0	2	0.0000	29	24	0.95	0.96	1.25
CM015574.1_RaGOO	27050000	43054107	5	0	0.0000	29	22	0.92	0.88	1.31
CM015574.1_RaGOO	27100000	43054107	0	0	0.0000	30	23	0.95	0.93	1.29
CM015574.1_RaGOO	27150000	43054107	10	7	0.0000	30	24	0.96	0.98	1.23
CM015574.1_RaGOO	27200000	43054107	0	1	0.0000	32	26	1.05	1.06	1.24
CM015574.1_RaGOO	27250000	43054107	0	0	0.0000	30	24	0.96	0.99	1.22
CM015574.1_RaGOO	27300000	43054107	1	1	0.0000	30	24	0.95	0.96	1.25
CM015574.1_RaGOO	27350000	43054107	6	0	0.0000	31	24	1.00	0.98	1.29
CM015574.1_RaGOO	27400000	43054107	3	2	0.0000	30	24	0.97	0.97	1.27
CM015574.1_RaGOO	27450000	43054107	2	1	0.0000	30	23	0.98	0.94	1.31
CM015574.1_RaGOO	27500000	43054107	13	1	0.0000	31	23	1.00	0.95	1.32
CM015574.1_RaGOO	27550000	43054107	2	1	0.0000	30	24	0.97	0.97	1.27
CM015574.1_RaGOO	27600000	43054107	1	4	0.0000	29	22	0.94	0.90	1.33
CM015574.1_RaGOO	27650000	43054107	0	1	0.0000	28	23	0.92	0.95	1.22
CM015574.1_RaGOO	27700000	43054107	0	0	0.0000	32	26	1.02	1.05	1.23
CM015574.1_RaGOO	27750000	43054107	4	3	0.0000	32	28	1.05	1.15	1.15
CM015574.1_RaGOO	27800000	43054107	1	0	0.0000	29	23	0.94	0.95	1.25
CM015574.1_RaGOO	27850000	43054107	5	0	0.0000	31	23	0.99	0.95	1.31
CM015574.1_RaGOO	27900000	43054107	0	0	0.0000	28	22	0.89	0.91	1.23
CM015574.1_RaGOO	27950000	43054107	7	0	0.0000	30	23	0.96	0.95	1.28
CM015574.1_RaGOO	28000000	43054107	1	0	0.0000	29	22	0.92	0.89	1.31
CM015574.1_RaGOO	28050000	43054107	1	1	0.0000	28	22	0.92	0.88	1.31
CM015574.1_RaGOO	28100000	43054107	0	1	0.0000	29	23	0.93	0.94	1.24
CM015574.1_RaGOO	28150000	43054107	0	0	0.0000	30	24	0.97	0.96	1.28
CM015574.1_RaGOO	28200000	43054107	0	2	0.0000	30	24	0.98	0.99	1.26
CM015574.1_RaGOO	28250000	43054107	3	2	0.0000	30	23	0.98	0.93	1.33
CM015574.1_RaGOO	28300000	43054107	1	1	0.0000	31	25	0.99	1.03	1.22
CM015574.1_RaGOO	28350000	43054107	1	0	0.0000	32	26	1.03	1.05	1.24
CM015574.1_RaGOO	28400000	43054107	0	0	0.0000	31	25	1.01	1.01	1.26
CM015574.1_RaGOO	28450000	43054107	0	0	0.0000	32	25	1.02	1.02	1.27
CM015574.1_RaGOO	28500000	43054107	0	0	0.0000	29	22	0.93	0.91	1.29
CM015574.1_RaGOO	28550000	43054107	2	0	0.0000	28	22	0.92	0.90	1.28
CM015574.1_RaGOO	28600000	43054107	0	0	0.0000	29	22	0.94	0.91	1.30
CM015574.1_RaGOO	28650000	43054107	4	0	0.0000	28	21	0.90	0.87	1.31
CM015574.1_RaGOO	28700000	43054107	0	0	0.0000	30	23	0.97	0.94	1.31
CM015574.1_RaGOO	28750000	43054107	1	0	0.0000	29	23	0.95	0.94	1.26
CM015574.1_RaGOO	28800000	43054107	0	1	0.0000	30	23	0.97	0.94	1.31
CM015574.1_RaGOO	28850000	43054107	6	6	0.0000	30	23	0.98	0.93	1.33
CM015574.1_RaGOO	28900000	43054107	1	0	0.0000	29	24	0.94	0.96	1.24
CM015574.1_RaGOO	28950000	43054107	0	1	0.0000	31	24	1.00	0.97	1.30
CM015574.1_RaGOO	29000000	43054107	0	0	0.0000	29	22	0.93	0.89	1.31
CM015574.1_RaGOO	29050000	43054107	4	0	0.0000	30	23	0.96	0.94	1.29
CM015574.1_RaGOO	29100000	43054107	3	0	0.0000	29	22	0.93	0.88	1.32
CM015574.1_RaGOO	29150000	43054107	4	1	0.0000	30	23	0.96	0.95	1.28
CM015574.1_RaGOO	29200000	43054107	0	0	0.0000	27	22	0.88	0.89	1.24
CM015574.1_RaGOO	29250000	43054107	3	1	0.0000	29	22	0.94	0.91	1.29
CM015574.1_RaGOO	29300000	43054107	3	2	0.0000	28	22	0.89	0.89	1.26
CM015574.1_RaGOO	29350000	43054107	1	1	0.0000	30	23	0.95	0.92	1.31
CM015574.1_RaGOO	29400000	43054107	0	0	0.0000	29	24	0.95	0.96	1.24
CM015574.1_RaGOO	29450000	43054107	0	0	0.0000	29	23	0.92	0.95	1.23
CM015574.1_RaGOO	29500000	43054107	0	4	0.0000	29	24	0.93	0.96	1.22
CM015574.1_RaGOO	29550000	43054107	0	1	0.0000	27	21	0.86	0.85	1.27
CM015574.1_RaGOO	29600000	43054107	0	0	0.0000	28	22	0.90	0.89	1.28
CM015574.1_RaGOO	29650000	43054107	0	0	0.0000	30	23	0.98	0.94	1.32
CM015574.1_RaGOO	29700000	43054107	3	7	0.0000	36	28	1.16	1.14	1.28
CM015574.1_RaGOO	29750000	43054107	13	1	0.0000	30	25	0.96	1.00	1.21
CM015574.1_RaGOO	29800000	43054107	0	1	0.0000	31	24	1.00	0.98	1.28
CM015574.1_RaGOO	29850000	43054107	7	0	0.0000	29	23	0.94	0.93	1.27
CM015574.1_RaGOO	29900000	43054107	0	1	0.0000	37	32	1.21	1.31	1.16
CM015574.1_RaGOO	29950000	43054107	1	1	0.0000	30	24	0.98	0.98	1.26
CM015574.1_RaGOO	30000000	43054107	2	0	0.0000	32	26	1.02	1.04	1.24
CM015574.1_RaGOO	30050000	43054107	10	1	0.0000	32	26	1.04	1.04	1.27
CM015574.1_RaGOO	30100000	43054107	1	3	0.0000	34	26	1.10	1.06	1.31
CM015574.1_RaGOO	30150000	43054107	1	0	0.0000	33	26	1.05	1.05	1.26
CM015574.1_RaGOO	30200000	43054107	4	2	0.0000	34	26	1.09	1.05	1.31
CM015574.1_RaGOO	30250000	43054107	0	0	0.0000	30	24	0.98	0.98	1.26
CM015574.1_RaGOO	30300000	43054107	2	1	0.0000	33	26	1.06	1.04	1.29
CM015574.1_RaGOO	30350000	43054107	0	0	0.0000	31	25	1.01	1.02	1.25
CM015574.1_RaGOO	30400000	43054107	1	2	0.0000	32	25	1.03	1.02	1.28
CM015574.1_RaGOO	30450000	43054107	3	0	0.0000	32	25	1.02	1.03	1.25
CM015574.1_RaGOO	30500000	43054107	1	2	0.0000	31	24	1.00	0.98	1.29
CM015574.1_RaGOO	30550000	43054107	1	0	0.0000	32	24	1.04	0.99	1.32
CM015574.1_RaGOO	30600000	43054107	5	0	0.0000	29	23	0.93	0.92	1.27
CM015574.1_RaGOO	30650000	43054107	0	1	0.0000	29	23	0.94	0.94	1.27
CM015574.1_RaGOO	30700000	43054107	4	0	0.0000	31	25	1.01	1.02	1.25
CM015574.1_RaGOO	30750000	43054107	1	6	0.0000	28	23	0.90	0.92	1.23
CM015574.1_RaGOO	30800000	43054107	8	0	0.0000	27	22	0.87	0.89	1.23
CM015574.1_RaGOO	30850000	43054107	5	0	0.0000	26	20	0.83	0.81	1.30
CM015574.1_RaGOO	30900000	43054107	0	0	0.0000	43	31	1.39	1.27	1.38
CM015574.1_RaGOO	30950000	43054107	24	0	0.0000	31	24	1.00	0.99	1.27
CM015574.1_RaGOO	31000000	43054107	5	5	0.0000	29	23	0.93	0.92	1.28
CM015574.1_RaGOO	31050000	43054107	0	0	0.0000	27	22	0.89	0.88	1.27
CM015574.1_RaGOO	31100000	43054107	0	0	0.0000	32	25	1.03	1.03	1.25
CM015574.1_RaGOO	31150000	43054107	9	2	0.0000	27	21	0.86	0.86	1.26
CM015574.1_RaGOO	31200000	43054107	0	2	0.0000	28	21	0.90	0.87	1.30
CM015574.1_RaGOO	31250000	43054107	1	0	0.0000	26	21	0.85	0.85	1.25
CM015574.1_RaGOO	31300000	43054107	4	1	0.0000	32	25	1.02	1.00	1.28
CM015574.1_RaGOO	31350000	43054107	5	4	0.0000	29	22	0.95	0.88	1.36
CM015574.1_RaGOO	31400000	43054107	0	9	0.0000	54	42	1.75	1.70	1.30
CM015574.1_RaGOO	31450000	43054107	2	0	0.0000	30	24	0.96	0.97	1.24
CM015574.1_RaGOO	31500000	43054107	1	0	0.0000	28	23	0.90	0.91	1.24
CM015574.1_RaGOO	31550000	43054107	1	19	0.0000	28	22	0.90	0.89	1.27
CM015574.1_RaGOO	31600000	43054107	0	1	0.0000	28	22	0.91	0.91	1.27
CM015574.1_RaGOO	31650000	43054107	3	3	0.0000	28	23	0.92	0.94	1.22
CM015574.1_RaGOO	31700000	43054107	2	0	0.0000	29	22	0.94	0.91	1.29
CM015574.1_RaGOO	31750000	43054107	2	2	0.0000	31	24	1.01	0.98	1.29
CM015574.1_RaGOO	31800000	43054107	1	1	0.0000	42	34	1.35	1.37	1.25
CM015574.1_RaGOO	31850000	43054107	0	0	0.0000	30	25	0.96	1.00	1.21
CM015574.1_RaGOO	31900000	43054107	0	0	0.0000	33	25	1.06	1.03	1.31
CM015574.1_RaGOO	31950000	43054107	1	1	0.0000	27	21	0.88	0.87	1.28
CM015574.1_RaGOO	32000000	43054107	0	3	0.0000	26	21	0.85	0.85	1.27
CM015574.1_RaGOO	32050000	43054107	1	0	0.0000	25	20	0.82	0.82	1.25
CM015574.1_RaGOO	32100000	43054107	0	0	0.0000	28	23	0.90	0.92	1.23
CM015574.1_RaGOO	32150000	43054107	1	0	0.0000	29	23	0.92	0.93	1.25
CM015574.1_RaGOO	32200000	43054107	2	1	0.0000	31	24	1.00	0.97	1.31
CM015574.1_RaGOO	32250000	43054107	1	2	0.0000	31	24	1.00	0.99	1.28
CM015574.1_RaGOO	32300000	43054107	0	0	0.0000	32	26	1.04	1.07	1.22
CM015574.1_RaGOO	32350000	43054107	6	4	0.0000	32	25	1.04	1.00	1.30
CM015574.1_RaGOO	32400000	43054107	1	0	0.0000	30	23	0.95	0.95	1.26
CM015574.1_RaGOO	32450000	43054107	0	0	0.0000	30	24	0.97	0.96	1.27
CM015574.1_RaGOO	32500000	43054107	0	1	0.0000	31	24	1.01	0.96	1.33
CM015574.1_RaGOO	32550000	43054107	0	1	0.0000	27	21	0.88	0.87	1.28
CM015574.1_RaGOO	32600000	43054107	0	1	0.0000	27	21	0.87	0.85	1.29
CM015574.1_RaGOO	32650000	43054107	5	1	0.0000	28	22	0.91	0.90	1.28
CM015574.1_RaGOO	32700000	43054107	2	3	0.0000	29	23	0.94	0.93	1.28
CM015574.1_RaGOO	32750000	43054107	1	6	0.0000	34	26	1.08	1.04	1.31
CM015574.1_RaGOO	32800000	43054107	0	0	0.0000	30	24	0.97	0.97	1.26
CM015574.1_RaGOO	32850000	43054107	1	0	0.0000	28	22	0.91	0.91	1.25
CM015574.1_RaGOO	32900000	43054107	0	23	0.0000	32	26	1.04	1.04	1.27
CM015574.1_RaGOO	32950000	43054107	0	2	0.0000	28	23	0.91	0.93	1.24
CM015574.1_RaGOO	33000000	43054107	2	2	0.0000	31	24	0.99	0.98	1.27
CM015574.1_RaGOO	33050000	43054107	0	2	0.0000	31	24	1.01	0.97	1.31
CM015574.1_RaGOO	33100000	43054107	0	9	0.0000	27	23	0.87	0.93	1.19
CM015574.1_RaGOO	33150000	43054107	0	0	0.0000	28	22	0.90	0.90	1.25
CM015574.1_RaGOO	33200000	43054107	5	2	0.0000	29	23	0.92	0.93	1.25
CM015574.1_RaGOO	33250000	43054107	0	1	0.0000	28	22	0.90	0.89	1.27
CM015574.1_RaGOO	33300000	43054107	11	4	0.0000	28	21	0.90	0.87	1.30
CM015574.1_RaGOO	33350000	43054107	0	0	0.0000	29	23	0.93	0.92	1.28
CM015574.1_RaGOO	33400000	43054107	0	0	0.0000	29	24	0.95	0.98	1.22
CM015574.1_RaGOO	33450000	43054107	0	1	0.0000	25	21	0.81	0.84	1.22
CM015574.1_RaGOO	33500000	43054107	0	3	0.0000	31	24	0.99	0.98	1.27
CM015574.1_RaGOO	33550000	43054107	0	9	0.0000	28	23	0.92	0.95	1.22
CM015574.1_RaGOO	33600000	43054107	0	1	0.0000	28	22	0.90	0.90	1.26
CM015574.1_RaGOO	33650000	43054107	0	0	0.0000	30	23	0.95	0.95	1.26
CM015574.1_RaGOO	33700000	43054107	0	1	0.0000	26	22	0.85	0.88	1.22
CM015574.1_RaGOO	33750000	43054107	1	1	0.0000	29	23	0.95	0.93	1.29
CM015574.1_RaGOO	33800000	43054107	0	1	0.0000	30	23	0.96	0.93	1.30
CM015574.1_RaGOO	33850000	43054107	0	1	0.0000	29	24	0.95	0.96	1.24
CM015574.1_RaGOO	33900000	43054107	0	0	0.0000	27	22	0.86	0.88	1.24
CM015574.1_RaGOO	33950000	43054107	0	0	0.0000	26	22	0.84	0.88	1.20
CM015574.1_RaGOO	34000000	43054107	0	1	0.0000	27	21	0.86	0.84	1.29
CM015574.1_RaGOO	34050000	43054107	3	1	0.0000	27	22	0.88	0.89	1.25
CM015574.1_RaGOO	34100000	43054107	0	0	0.0000	28	22	0.91	0.88	1.31
CM015574.1_RaGOO	34150000	43054107	0	0	0.0000	27	22	0.87	0.88	1.24
CM015574.1_RaGOO	34200000	43054107	0	0	0.0000	33	25	1.05	1.00	1.32
CM015574.1_RaGOO	34250000	43054107	0	1	0.0000	31	24	0.99	0.98	1.27
CM015574.1_RaGOO	34300000	43054107	0	0	0.0000	29	23	0.93	0.92	1.28
CM015574.1_RaGOO	34350000	43054107	0	0	0.0000	27	21	0.88	0.86	1.28
CM015574.1_RaGOO	34400000	43054107	0	1	0.0000	30	22	0.96	0.90	1.34
CM015574.1_RaGOO	34450000	43054107	0	1	0.0000	26	21	0.85	0.86	1.24
CM015574.1_RaGOO	34500000	43054107	0	0	0.0000	31	25	1.01	1.01	1.25
CM015574.1_RaGOO	34550000	43054107	3	0	0.0000	29	24	0.93	0.96	1.22
CM015574.1_RaGOO	34600000	43054107	0	0	0.0000	26	21	0.85	0.86	1.24
CM015574.1_RaGOO	34650000	43054107	0	0	0.0000	28	22	0.90	0.91	1.25
CM015574.1_RaGOO	34700000	43054107	0	0	0.0000	31	24	0.98	0.97	1.28
CM015574.1_RaGOO	34750000	43054107	0	2	0.0000	28	22	0.91	0.88	1.29
CM015574.1_RaGOO	34800000	43054107	1	0	0.0000	29	22	0.94	0.91	1.31
CM015574.1_RaGOO	34850000	43054107	0	0	0.0000	26	21	0.85	0.83	1.29
CM015574.1_RaGOO	34900000	43054107	2	0	0.0000	30	24	0.97	0.99	1.24
CM015574.1_RaGOO	34950000	43054107	0	0	0.0000	33	25	1.07	1.02	1.33
CM015574.1_RaGOO	35000000	43054107	1	1	0.0000	31	25	1.00	1.00	1.27
CM015574.1_RaGOO	35050000	43054107	4	4	0.0000	29	23	0.93	0.92	1.27
CM015574.1_RaGOO	35100000	43054107	3	0	0.0000	29	23	0.93	0.92	1.28
CM015574.1_RaGOO	35150000	43054107	4	0	0.0000	28	22	0.89	0.88	1.28
CM015574.1_RaGOO	35200000	43054107	0	0	0.0000	31	23	0.99	0.94	1.32
CM015574.1_RaGOO	35250000	43054107	0	4	0.0000	31	24	1.00	0.96	1.32
CM015574.1_RaGOO	35300000	43054107	1	0	0.0000	30	25	0.96	1.00	1.21
CM015574.1_RaGOO	35350000	43054107	1	0	0.0000	30	24	0.96	0.98	1.23
CM015574.1_RaGOO	35400000	43054107	11	0	0.0000	31	25	1.00	1.01	1.25
CM015574.1_RaGOO	35450000	43054107	0	0	0.0000	31	24	0.99	0.96	1.31
CM015574.1_RaGOO	35500000	43054107	2	0	0.0000	30	24	0.95	0.96	1.25
CM015574.1_RaGOO	35550000	43054107	0	1	0.0000	29	23	0.94	0.94	1.26
CM015574.1_RaGOO	35600000	43054107	2	0	0.0000	27	22	0.88	0.89	1.25
CM015574.1_RaGOO	35650000	43054107	1	1	0.0000	29	24	0.95	0.96	1.24
CM015574.1_RaGOO	35700000	43054107	4	0	0.0000	31	24	0.99	0.99	1.27
CM015574.1_RaGOO	35750000	43054107	1	1	0.0000	29	24	0.95	0.96	1.25
CM015574.1_RaGOO	35800000	43054107	0	4	0.0000	31	25	1.01	1.01	1.26
CM015574.1_RaGOO	35850000	43054107	2	1	0.0000	57	41	1.85	1.68	1.38
CM015574.1_RaGOO	35900000	43054107	0	1	0.0000	32	25	1.03	1.01	1.28
CM015574.1_RaGOO	35950000	43054107	0	3	0.0000	24	19	0.77	0.76	1.27
CM015574.1_RaGOO	36000000	43054107	0	3	0.0000	10	7	0.31	0.28	1.39
CM015574.1_RaGOO	36050000	43054107	0	0	0.0000	30	23	0.98	0.95	1.30
CM015574.1_RaGOO	36100000	43054107	0	0	0.0000	29	23	0.95	0.92	1.30
CM015574.1_RaGOO	36150000	43054107	0	5	0.0000	31	25	1.00	1.02	1.24
CM015574.1_RaGOO	36200000	43054107	0	0	0.0000	28	22	0.91	0.90	1.27
CM015574.1_RaGOO	36250000	43054107	1	2	0.0000	32	23	1.05	0.93	1.42
CM015574.1_RaGOO	36300000	43054107	0	1	0.0000	31	25	0.99	1.00	1.25
CM015574.1_RaGOO	36350000	43054107	0	0	0.0000	33	26	1.06	1.04	1.29
CM015574.1_RaGOO	36400000	43054107	2	0	0.0000	31	24	0.99	0.99	1.26
CM015574.1_RaGOO	36450000	43054107	2	0	0.0000	31	25	1.00	1.03	1.23
CM015574.1_RaGOO	36500000	43054107	0	0	0.0000	32	25	1.04	1.02	1.29
CM015574.1_RaGOO	36550000	43054107	0	8	0.0000	27	21	0.87	0.86	1.27
CM015574.1_RaGOO	36600000	43054107	1	1	0.0000	30	24	0.95	0.96	1.26
CM015574.1_RaGOO	36650000	43054107	0	1	0.0000	33	26	1.07	1.07	1.26
CM015574.1_RaGOO	36700000	43054107	0	0	0.0000	25	20	0.80	0.81	1.26
CM015574.1_RaGOO	36750000	43054107	0	0	0.0000	29	23	0.92	0.92	1.26
CM015574.1_RaGOO	36800000	43054107	1	0	0.0000	28	22	0.92	0.91	1.27
CM015574.1_RaGOO	36850000	43054107	0	0	0.0000	27	21	0.86	0.87	1.24
CM015574.1_RaGOO	36900000	43054107	1	5	0.0000	27	21	0.88	0.86	1.30
CM015574.1_RaGOO	36950000	43054107	2	1	0.0000	36	26	1.16	1.07	1.37
CM015574.1_RaGOO	37000000	43054107	0	0	0.0000	32	25	1.04	1.00	1.30
CM015574.1_RaGOO	37050000	43054107	3	1	0.0000	30	24	0.97	0.97	1.25
CM015574.1_RaGOO	37100000	43054107	11	0	0.0000	31	25	1.01	1.01	1.25
CM015574.1_RaGOO	37150000	43054107	0	0	0.0000	29	24	0.94	0.98	1.21
CM015574.1_RaGOO	37200000	43054107	1	3	0.0000	27	23	0.88	0.92	1.20
CM015574.1_RaGOO	37250000	43054107	0	0	0.0000	27	22	0.86	0.87	1.25
CM015574.1_RaGOO	37300000	43054107	0	0	0.0000	28	22	0.90	0.91	1.25
CM015574.1_RaGOO	37350000	43054107	1	0	0.0000	25	19	0.80	0.79	1.28
CM015574.1_RaGOO	37400000	43054107	0	0	0.0000	27	22	0.88	0.90	1.23
CM015574.1_RaGOO	37450000	43054107	4	1	0.0000	32	26	1.02	1.05	1.22
CM015574.1_RaGOO	37500000	43054107	0	5	0.0000	31	28	0.99	1.12	1.12
CM015574.1_RaGOO	37550000	43054107	0	4	0.0000	29	23	0.95	0.93	1.28
CM015574.1_RaGOO	37600000	43054107	0	2	0.0000	29	22	0.93	0.90	1.30
CM015574.1_RaGOO	37650000	43054107	0	0	0.0000	29	23	0.94	0.92	1.29
CM015574.1_RaGOO	37700000	43054107	0	0	0.0000	27	22	0.87	0.88	1.26
CM015574.1_RaGOO	37750000	43054107	7	3	0.0000	27	21	0.86	0.85	1.28
CM015574.1_RaGOO	37800000	43054107	0	0	0.0000	27	21	0.88	0.86	1.29
CM015574.1_RaGOO	37850000	43054107	3	0	0.0000	26	21	0.85	0.84	1.28
CM015574.1_RaGOO	37900000	43054107	0	0	0.0000	28	22	0.89	0.89	1.26
CM015574.1_RaGOO	37950000	43054107	0	0	0.0000	32	25	1.03	1.03	1.26
CM015574.1_RaGOO	38000000	43054107	0	0	0.0000	74	57	2.40	2.33	1.30
CM015574.1_RaGOO	38050000	43054107	1	0	0.0000	29	24	0.94	0.96	1.24
CM015574.1_RaGOO	38100000	43054107	0	0	0.0000	29	23	0.95	0.94	1.28
CM015574.1_RaGOO	38150000	43054107	0	0	0.0000	29	23	0.94	0.92	1.29
CM015574.1_RaGOO	38200000	43054107	0	1	0.0000	26	20	0.82	0.83	1.25
CM015574.1_RaGOO	38250000	43054107	10	0	0.0000	38	32	1.21	1.30	1.18
CM015574.1_RaGOO	38300000	43054107	3	0	0.0000	28	21	0.89	0.86	1.31
CM015574.1_RaGOO	38350000	43054107	0	1	0.0000	36	28	1.16	1.14	1.29
CM015574.1_RaGOO	38400000	43054107	0	0	0.0000	29	24	0.94	0.97	1.22
CM015574.1_RaGOO	38450000	43054107	0	0	0.0000	31	24	1.01	0.97	1.31
CM015574.1_RaGOO	38500000	43054107	0	0	0.0000	29	23	0.93	0.92	1.26
CM015574.1_RaGOO	38550000	43054107	0	0	0.0000	33	25	1.06	1.03	1.30
CM015574.1_RaGOO	38600000	43054107	0	3	0.0000	32	26	1.03	1.04	1.25
CM015574.1_RaGOO	38650000	43054107	0	0	0.0000	30	24	0.98	0.97	1.27
CM015574.1_RaGOO	38700000	43054107	2	0	0.0000	27	21	0.87	0.86	1.27
CM015574.1_RaGOO	38750000	43054107	4	0	0.0000	28	22	0.91	0.91	1.26
CM015574.1_RaGOO	38800000	43054107	0	0	0.0000	27	21	0.87	0.85	1.28
CM015574.1_RaGOO	38850000	43054107	0	0	0.0000	28	22	0.92	0.91	1.28
CM015574.1_RaGOO	38900000	43054107	0	0	0.0000	30	24	0.95	0.97	1.24
CM015574.1_RaGOO	38950000	43054107	1	0	0.0000	27	22	0.88	0.90	1.23
CM015574.1_RaGOO	39000000	43054107	1	1	0.0000	27	22	0.87	0.90	1.23
CM015574.1_RaGOO	39050000	43054107	0	1	0.0000	31	24	1.00	0.97	1.30
CM015574.1_RaGOO	39100000	43054107	6	0	0.0000	29	23	0.93	0.93	1.26
CM015574.1_RaGOO	39150000	43054107	4	6	0.0000	29	24	0.95	0.97	1.23
CM015574.1_RaGOO	39200000	43054107	0	1	0.0000	27	22	0.87	0.89	1.23
CM015574.1_RaGOO	39250000	43054107	2	0	0.0000	28	22	0.89	0.91	1.24
CM015574.1_RaGOO	39300000	43054107	3	0	0.0000	30	24	0.95	0.96	1.25
CM015574.1_RaGOO	39350000	43054107	2	0	0.0000	28	23	0.92	0.92	1.25
CM015574.1_RaGOO	39400000	43054107	0	2	0.0000	32	24	1.02	0.98	1.30
CM015574.1_RaGOO	39450000	43054107	3	0	0.0000	31	25	0.99	1.02	1.23
CM015574.1_RaGOO	39500000	43054107	1	0	0.0000	30	23	0.98	0.93	1.32
CM015574.1_RaGOO	39550000	43054107	1	0	0.0000	31	24	1.00	0.99	1.28
CM015574.1_RaGOO	39600000	43054107	1	4	0.0000	29	23	0.94	0.95	1.25
CM015574.1_RaGOO	39650000	43054107	1	0	0.0000	33	26	1.05	1.05	1.27
CM015574.1_RaGOO	39700000	43054107	1	2	0.0000	28	23	0.92	0.92	1.26
CM015574.1_RaGOO	39750000	43054107	0	3	0.0000	27	21	0.87	0.86	1.28
CM015574.1_RaGOO	39800000	43054107	0	1	0.0000	29	23	0.93	0.93	1.25
CM015574.1_RaGOO	39850000	43054107	1	0	0.0000	28	22	0.90	0.89	1.27
CM015574.1_RaGOO	39900000	43054107	0	0	0.0000	28	24	0.91	0.96	1.19
CM015574.1_RaGOO	39950000	43054107	4	0	0.0000	31	23	0.99	0.95	1.31
CM015574.1_RaGOO	40000000	43054107	0	1	0.0000	27	21	0.87	0.87	1.26
CM015574.1_RaGOO	40050000	43054107	0	0	0.0000	30	23	0.97	0.95	1.28
CM015574.1_RaGOO	40100000	43054107	0	1	0.0000	29	24	0.93	0.96	1.23
CM015574.1_RaGOO	40150000	43054107	1	1	0.0000	30	22	0.96	0.88	1.38
CM015574.1_RaGOO	40200000	43054107	0	0	0.0000	28	23	0.92	0.93	1.24
CM015574.1_RaGOO	40250000	43054107	1	0	0.0000	28	22	0.89	0.89	1.26
CM015574.1_RaGOO	40300000	43054107	0	0	0.0000	29	23	0.94	0.92	1.29
CM015574.1_RaGOO	40350000	43054107	0	0	0.0000	28	22	0.89	0.90	1.26
CM015574.1_RaGOO	40400000	43054107	0	0	0.0000	28	22	0.90	0.91	1.25
CM015574.1_RaGOO	40450000	43054107	0	3	0.0000	28	22	0.90	0.89	1.27
CM015574.1_RaGOO	40500000	43054107	0	2	0.0000	28	22	0.90	0.87	1.29
CM015574.1_RaGOO	40550000	43054107	6	0	0.0000	30	23	0.96	0.95	1.28
CM015574.1_RaGOO	40600000	43054107	0	5	0.0000	28	22	0.90	0.89	1.28
CM015574.1_RaGOO	40650000	43054107	0	0	0.0000	27	20	0.87	0.83	1.32
CM015574.1_RaGOO	40700000	43054107	0	0	0.0000	29	22	0.92	0.91	1.27
CM015574.1_RaGOO	40750000	43054107	0	0	0.0000	26	21	0.84	0.85	1.24
CM015574.1_RaGOO	40800000	43054107	2	0	0.0000	27	20	0.88	0.82	1.34
CM015574.1_RaGOO	40850000	43054107	0	0	0.0000	25	20	0.82	0.82	1.26
CM015574.1_RaGOO	40900000	43054107	0	0	0.0000	26	21	0.84	0.84	1.26
CM015574.1_RaGOO	40950000	43054107	0	1	0.0000	28	22	0.90	0.87	1.29
CM015574.1_RaGOO	41000000	43054107	0	1	0.0000	25	20	0.82	0.81	1.27
CM015574.1_RaGOO	41050000	43054107	1	0	0.0000	30	24	0.98	0.99	1.25
CM015574.1_RaGOO	41100000	43054107	1	0	0.0000	28	22	0.92	0.90	1.28
CM015574.1_RaGOO	41150000	43054107	0	4	0.0000	29	23	0.93	0.92	1.27
CM015574.1_RaGOO	41200000	43054107	0	6	0.0000	27	21	0.87	0.85	1.29
CM015574.1_RaGOO	41250000	43054107	0	4	0.0000	31	24	1.00	0.97	1.30
CM015574.1_RaGOO	41300000	43054107	0	0	0.0000	28	22	0.90	0.88	1.29
CM015574.1_RaGOO	41350000	43054107	0	3	0.0000	27	22	0.89	0.88	1.27
CM015574.1_RaGOO	41400000	43054107	0	0	0.0000	28	22	0.90	0.90	1.25
CM015574.1_RaGOO	41450000	43054107	1	2	0.0000	28	22	0.90	0.89	1.28
CM015574.1_RaGOO	41500000	43054107	0	16	0.0000	28	22	0.91	0.89	1.29
CM015574.1_RaGOO	41550000	43054107	0	10	0.0000	30	22	0.98	0.91	1.36
CM015574.1_RaGOO	41600000	43054107	0	3	0.0000	31	24	1.00	0.99	1.28
CM015574.1_RaGOO	41650000	43054107	1	0	0.0000	30	23	0.97	0.93	1.32
CM015574.1_RaGOO	41700000	43054107	0	0	0.0000	35	27	1.12	1.08	1.30
CM015574.1_RaGOO	41750000	43054107	1	0	0.0000	30	23	0.98	0.95	1.29
CM015574.1_RaGOO	41800000	43054107	0	0	0.0000	30	23	0.97	0.94	1.29
CM015574.1_RaGOO	41850000	43054107	0	1	0.0000	29	23	0.95	0.94	1.28
CM015574.1_RaGOO	41900000	43054107	1	1	0.0000	29	23	0.93	0.92	1.27
CM015574.1_RaGOO	41950000	43054107	0	0	0.0000	29	22	0.92	0.90	1.29
CM015574.1_RaGOO	42000000	43054107	1	1	0.0000	28	23	0.92	0.94	1.23
CM015574.1_RaGOO	42050000	43054107	0	0	0.0000	30	23	0.97	0.95	1.29
CM015574.1_RaGOO	42100000	43054107	0	2	0.0000	33	25	1.05	1.03	1.29
CM015574.1_RaGOO	42150000	43054107	2	0	0.0000	37	26	1.20	1.07	1.40
CM015574.1_RaGOO	42200000	43054107	0	2	0.0000	27	21	0.87	0.86	1.28
CM015574.1_RaGOO	42250000	43054107	1	2	0.0000	55	44	1.78	1.80	1.25
CM015574.1_RaGOO	42300000	43054107	1	6	0.0000	28	22	0.91	0.90	1.28
CM015574.1_RaGOO	42350000	43054107	0	0	0.0000	30	23	0.97	0.93	1.32
CM015574.1_RaGOO	42400000	43054107	1	7	0.0000	28	22	0.90	0.88	1.29
CM015574.1_RaGOO	42450000	43054107	9	2	0.0000	29	23	0.94	0.93	1.26
CM015574.1_RaGOO	42500000	43054107	0	1	0.0000	31	24	1.00	0.98	1.28
CM015574.1_RaGOO	42550000	43054107	0	0	0.0000	91	70	2.94	2.84	1.31
CM015574.1_RaGOO	42600000	43054107	0	4	0.0000	26	20	0.84	0.82	1.29
CM015574.1_RaGOO	42650000	43054107	0	2	0.0000	28	22	0.89	0.90	1.24
CM015574.1_RaGOO	42700000	43054107	0	0	0.0000	27	20	0.86	0.83	1.31
CM015574.1_RaGOO	42750000	43054107	1	2	0.0000	30	23	0.97	0.94	1.30
CM015574.1_RaGOO	42800000	43054107	0	0	0.0000	30	24	0.97	0.96	1.27
CM015574.1_RaGOO	42850000	43054107	2	0	0.0000	25	20	0.80	0.82	1.23
CM015574.1_RaGOO	42900000	43054107	0	0	0.0000	30	25	0.98	1.02	1.21
CM015574.1_RaGOO	42950000	43054107	4	1	0.0000	30	23	0.96	0.95	1.29
CM015574.1_RaGOO	43000000	43054107	0	7	0.0000	29	23	0.92	0.92	1.26
CM015574.1_RaGOO	43025000	43054107	1	2	0.0000	25	19	0.80	0.78	1.29
CM015575.1_RaGOO	0	41131340	0	0	0.0000	27	22	0.87	0.91	1.21
CM015575.1_RaGOO	50000	41131340	0	0	0.0000	27	22	0.87	0.90	1.22
CM015575.1_RaGOO	100000	41131340	0	2	0.0000	29	22	0.92	0.88	1.31
CM015575.1_RaGOO	150000	41131340	1	0	0.0000	30	23	0.96	0.94	1.30
CM015575.1_RaGOO	200000	41131340	3	1	0.0000	29	22	0.92	0.89	1.30
CM015575.1_RaGOO	250000	41131340	0	1	0.0000	28	23	0.91	0.92	1.24
CM015575.1_RaGOO	300000	41131340	4	0	0.0000	29	23	0.92	0.94	1.24
CM015575.1_RaGOO	350000	41131340	0	1	0.0000	29	23	0.95	0.95	1.26
CM015575.1_RaGOO	400000	41131340	3	0	0.0000	29	23	0.93	0.95	1.23
CM015575.1_RaGOO	450000	41131340	8	2	0.0000	29	22	0.94	0.89	1.33
CM015575.1_RaGOO	500000	41131340	4	1	0.0000	30	23	0.95	0.93	1.30
CM015575.1_RaGOO	550000	41131340	4	2	0.0000	28	22	0.91	0.87	1.31
CM015575.1_RaGOO	600000	41131340	9	4	0.0000	28	22	0.90	0.88	1.29
CM015575.1_RaGOO	650000	41131340	1	0	0.0000	21	16	0.67	0.65	1.30
CM015575.1_RaGOO	700000	41131340	5	1	0.0000	30	23	0.95	0.95	1.27
CM015575.1_RaGOO	750000	41131340	0	0	0.0000	27	22	0.88	0.88	1.26
CM015575.1_RaGOO	800000	41131340	0	0	0.0000	28	22	0.91	0.89	1.29
CM015575.1_RaGOO	850000	41131340	0	0	0.0000	28	22	0.92	0.90	1.29
CM015575.1_RaGOO	900000	41131340	0	1	0.0000	29	23	0.95	0.93	1.28
CM015575.1_RaGOO	950000	41131340	9	2	0.0000	27	21	0.86	0.85	1.28
CM015575.1_RaGOO	1000000	41131340	0	4	0.0000	29	22	0.92	0.91	1.27
CM015575.1_RaGOO	1050000	41131340	0	0	0.0000	29	23	0.95	0.93	1.28
CM015575.1_RaGOO	1100000	41131340	0	0	0.0000	29	22	0.93	0.90	1.31
CM015575.1_RaGOO	1150000	41131340	1	0	0.0000	29	23	0.93	0.93	1.26
CM015575.1_RaGOO	1200000	41131340	0	4	0.0000	27	22	0.87	0.89	1.23
CM015575.1_RaGOO	1250000	41131340	3	0	0.0000	26	20	0.84	0.81	1.30
CM015575.1_RaGOO	1300000	41131340	0	2	0.0000	30	23	0.96	0.95	1.27
CM015575.1_RaGOO	1350000	41131340	4	1	0.0000	28	22	0.91	0.91	1.26
CM015575.1_RaGOO	1400000	41131340	3	5	0.0000	31	24	0.98	0.98	1.26
CM015575.1_RaGOO	1450000	41131340	1	4	0.0000	29	23	0.94	0.92	1.28
CM015575.1_RaGOO	1500000	41131340	0	1	0.0000	31	25	1.00	1.01	1.25
CM015575.1_RaGOO	1550000	41131340	0	1	0.0000	32	25	1.04	1.01	1.30
CM015575.1_RaGOO	1600000	41131340	9	1	0.0000	32	25	1.03	1.01	1.28
CM015575.1_RaGOO	1650000	41131340	0	4	0.0000	32	24	1.02	0.98	1.31
CM015575.1_RaGOO	1700000	41131340	2	0	0.0000	29	23	0.94	0.94	1.26
CM015575.1_RaGOO	1750000	41131340	1	0	0.0000	30	24	0.96	0.99	1.22
CM015575.1_RaGOO	1800000	41131340	1	0	0.0000	29	23	0.94	0.92	1.29
CM015575.1_RaGOO	1850000	41131340	2	5	0.0000	30	23	0.96	0.95	1.28
CM015575.1_RaGOO	1900000	41131340	0	6	0.0000	29	23	0.93	0.91	1.29
CM015575.1_RaGOO	1950000	41131340	0	0	0.0000	31	24	1.01	0.97	1.30
CM015575.1_RaGOO	2000000	41131340	1	0	0.0000	32	26	1.04	1.04	1.26
CM015575.1_RaGOO	2050000	41131340	0	1	0.0000	29	23	0.94	0.94	1.26
CM015575.1_RaGOO	2100000	41131340	3	1	0.0000	30	22	0.95	0.91	1.33
CM015575.1_RaGOO	2150000	41131340	1	5	0.0000	30	25	0.97	1.01	1.21
CM015575.1_RaGOO	2200000	41131340	1	1	0.0000	29	23	0.94	0.95	1.24
CM015575.1_RaGOO	2250000	41131340	3	0	0.0000	28	22	0.91	0.88	1.31
CM015575.1_RaGOO	2300000	41131340	2	1	0.0000	31	23	0.99	0.93	1.34
CM015575.1_RaGOO	2350000	41131340	0	0	0.0000	30	24	0.98	0.96	1.28
CM015575.1_RaGOO	2400000	41131340	0	1	0.0000	29	22	0.93	0.91	1.30
CM015575.1_RaGOO	2450000	41131340	1	0	0.0000	29	23	0.93	0.94	1.24
CM015575.1_RaGOO	2500000	41131340	1	2	0.0000	28	22	0.91	0.90	1.27
CM015575.1_RaGOO	2550000	41131340	1	0	0.0000	30	24	0.97	0.97	1.26
CM015575.1_RaGOO	2600000	41131340	0	5	0.0000	32	25	1.03	1.02	1.28
CM015575.1_RaGOO	2650000	41131340	1	0	0.0000	32	24	1.03	0.99	1.31
CM015575.1_RaGOO	2700000	41131340	0	8	0.0000	28	23	0.89	0.94	1.20
CM015575.1_RaGOO	2750000	41131340	5	0	0.0000	29	24	0.95	0.96	1.25
CM015575.1_RaGOO	2800000	41131340	2	0	0.0000	30	24	0.97	0.98	1.25
CM015575.1_RaGOO	2850000	41131340	2	1	0.0000	44	35	1.41	1.44	1.24
CM015575.1_RaGOO	2900000	41131340	4	3	0.0000	32	26	1.04	1.04	1.27
CM015575.1_RaGOO	2950000	41131340	3	1	0.0000	29	23	0.93	0.93	1.26
CM015575.1_RaGOO	3000000	41131340	1	0	0.0000	30	23	0.95	0.95	1.26
CM015575.1_RaGOO	3050000	41131340	1	0	0.0000	30	25	0.98	1.01	1.23
CM015575.1_RaGOO	3100000	41131340	3	1	0.0000	31	24	0.99	0.99	1.26
CM015575.1_RaGOO	3150000	41131340	0	0	0.0000	30	24	0.96	0.96	1.26
CM015575.1_RaGOO	3200000	41131340	3	4	0.0000	33	26	1.05	1.05	1.27
CM015575.1_RaGOO	3250000	41131340	1	3	0.0000	31	25	1.01	1.02	1.25
CM015575.1_RaGOO	3300000	41131340	0	0	0.0000	31	25	0.99	1.01	1.24
CM015575.1_RaGOO	3350000	41131340	1	0	0.0000	33	27	1.07	1.09	1.23
CM015575.1_RaGOO	3400000	41131340	2	1	0.0000	32	24	1.03	0.98	1.32
CM015575.1_RaGOO	3450000	41131340	0	3	0.0000	31	24	0.99	0.96	1.30
CM015575.1_RaGOO	3500000	41131340	1	0	0.0000	31	24	1.00	0.98	1.29
CM015575.1_RaGOO	3550000	41131340	0	1	0.0000	32	24	1.04	0.99	1.32
CM015575.1_RaGOO	3600000	41131340	1	1	0.0000	29	23	0.94	0.93	1.28
CM015575.1_RaGOO	3650000	41131340	3	6	0.0000	30	24	0.96	0.97	1.24
CM015575.1_RaGOO	3700000	41131340	0	1	0.0000	27	22	0.89	0.88	1.27
CM015575.1_RaGOO	3750000	41131340	0	1	0.0000	29	24	0.95	0.96	1.24
CM015575.1_RaGOO	3800000	41131340	1	0	0.0000	32	27	1.04	1.09	1.20
CM015575.1_RaGOO	3850000	41131340	0	1	0.0000	32	26	1.04	1.04	1.25
CM015575.1_RaGOO	3900000	41131340	1	1	0.0000	29	23	0.93	0.93	1.26
CM015575.1_RaGOO	3950000	41131340	1	0	0.0000	31	26	0.99	1.04	1.20
CM015575.1_RaGOO	4000000	41131340	0	1	0.0000	30	24	0.95	0.96	1.25
CM015575.1_RaGOO	4050000	41131340	0	1	0.0000	30	23	0.96	0.95	1.28
CM015575.1_RaGOO	4100000	41131340	3	1	0.0000	27	22	0.88	0.90	1.24
CM015575.1_RaGOO	4150000	41131340	5	0	0.0000	28	22	0.89	0.88	1.29
CM015575.1_RaGOO	4200000	41131340	1	5	0.0000	31	24	1.01	0.98	1.29
CM015575.1_RaGOO	4250000	41131340	1	3	0.0000	32	25	1.04	1.03	1.28
CM015575.1_RaGOO	4300000	41131340	0	1	0.0000	30	23	0.98	0.95	1.30
CM015575.1_RaGOO	4350000	41131340	0	1	0.0000	31	24	1.00	0.99	1.27
CM015575.1_RaGOO	4400000	41131340	2	2	0.0000	31	25	1.02	1.03	1.24
CM015575.1_RaGOO	4450000	41131340	0	0	0.0000	27	22	0.89	0.89	1.26
CM015575.1_RaGOO	4500000	41131340	0	0	0.0000	29	23	0.93	0.95	1.23
CM015575.1_RaGOO	4550000	41131340	2	2	0.0000	31	24	0.99	0.99	1.26
CM015575.1_RaGOO	4600000	41131340	2	4	0.0000	29	24	0.93	0.97	1.21
CM015575.1_RaGOO	4650000	41131340	0	0	0.0000	31	24	1.01	0.99	1.29
CM015575.1_RaGOO	4700000	41131340	0	1	0.0000	31	24	1.01	0.99	1.29
CM015575.1_RaGOO	4750000	41131340	0	0	0.0000	29	23	0.94	0.92	1.29
CM015575.1_RaGOO	4800000	41131340	3	2	0.0000	31	25	1.00	1.03	1.23
CM015575.1_RaGOO	4850000	41131340	0	3	0.0000	29	23	0.94	0.93	1.28
CM015575.1_RaGOO	4900000	41131340	2	1	0.0000	31	24	0.99	0.99	1.26
CM015575.1_RaGOO	4950000	41131340	0	0	0.0000	32	25	1.03	1.02	1.28
CM015575.1_RaGOO	5000000	41131340	1	5	0.0000	35	27	1.13	1.11	1.28
CM015575.1_RaGOO	5050000	41131340	1	1	0.0000	28	23	0.91	0.92	1.24
CM015575.1_RaGOO	5100000	41131340	0	0	0.0000	32	25	1.02	1.01	1.27
CM015575.1_RaGOO	5150000	41131340	3	0	0.0000	32	25	1.02	1.01	1.27
CM015575.1_RaGOO	5200000	41131340	0	1	0.0000	33	26	1.05	1.04	1.28
CM015575.1_RaGOO	5250000	41131340	1	2	0.0000	32	24	1.02	0.99	1.30
CM015575.1_RaGOO	5300000	41131340	0	9	0.0000	33	25	1.06	1.03	1.29
CM015575.1_RaGOO	5350000	41131340	1	2	0.0000	29	23	0.94	0.92	1.28
CM015575.1_RaGOO	5400000	41131340	3	0	0.0000	30	24	0.97	0.96	1.27
CM015575.1_RaGOO	5450000	41131340	1	0	0.0000	32	25	1.03	1.01	1.28
CM015575.1_RaGOO	5500000	41131340	2	0	0.0000	30	23	0.97	0.95	1.28
CM015575.1_RaGOO	5550000	41131340	1	3	0.0000	32	24	1.02	0.99	1.30
CM015575.1_RaGOO	5600000	41131340	3	0	0.0000	30	24	0.98	0.98	1.26
CM015575.1_RaGOO	5650000	41131340	4	1	0.0000	30	24	0.95	0.98	1.22
CM015575.1_RaGOO	5700000	41131340	0	4	0.0000	31	24	0.99	0.96	1.30
CM015575.1_RaGOO	5750000	41131340	0	0	0.0000	30	25	0.98	1.01	1.22
CM015575.1_RaGOO	5800000	41131340	1	1	0.0000	31	24	0.99	0.98	1.28
CM015575.1_RaGOO	5850000	41131340	1	10	0.0000	30	24	0.96	0.99	1.22
CM015575.1_RaGOO	5900000	41131340	0	13	0.0000	37	30	1.20	1.21	1.26
CM015575.1_RaGOO	5950000	41131340	0	0	0.0000	48	41	1.55	1.66	1.17
CM015575.1_RaGOO	6000000	41131340	0	0	0.0000	33	27	1.08	1.08	1.25
CM015575.1_RaGOO	6050000	41131340	5	0	0.0000	30	24	0.98	0.98	1.27
CM015575.1_RaGOO	6100000	41131340	0	1	0.0000	32	25	1.04	1.01	1.30
CM015575.1_RaGOO	6150000	41131340	1	0	0.0000	34	25	1.09	1.03	1.33
CM015575.1_RaGOO	6200000	41131340	2	2	0.0000	32	25	1.03	1.01	1.28
CM015575.1_RaGOO	6250000	41131340	16	3	0.0000	30	24	0.97	0.97	1.26
CM015575.1_RaGOO	6300000	41131340	1	0	0.0000	29	23	0.95	0.94	1.27
CM015575.1_RaGOO	6350000	41131340	1	1	0.0000	30	24	0.97	0.98	1.24
CM015575.1_RaGOO	6400000	41131340	1	0	0.0000	29	23	0.94	0.94	1.26
CM015575.1_RaGOO	6450000	41131340	1	1	0.0000	33	27	1.05	1.11	1.19
CM015575.1_RaGOO	6500000	41131340	0	0	0.0000	28	22	0.91	0.90	1.27
CM015575.1_RaGOO	6550000	41131340	0	2	0.0000	30	24	0.97	0.96	1.28
CM015575.1_RaGOO	6600000	41131340	1	0	0.0000	29	24	0.93	0.98	1.20
CM015575.1_RaGOO	6650000	41131340	0	2	0.0000	33	26	1.05	1.04	1.27
CM015575.1_RaGOO	6700000	41131340	0	0	0.0000	31	23	1.00	0.95	1.33
CM015575.1_RaGOO	6750000	41131340	4	1	0.0000	30	24	0.98	0.98	1.26
CM015575.1_RaGOO	6800000	41131340	8	3	0.0000	32	25	1.02	1.03	1.24
CM015575.1_RaGOO	6850000	41131340	2	1	0.0000	31	24	0.99	0.98	1.27
CM015575.1_RaGOO	6900000	41131340	3	4	0.0000	31	25	1.01	1.00	1.26
CM015575.1_RaGOO	6950000	41131340	0	1	0.0000	31	24	0.99	0.97	1.29
CM015575.1_RaGOO	7000000	41131340	1	0	0.0000	32	26	1.03	1.06	1.23
CM015575.1_RaGOO	7050000	41131340	2	4	0.0000	32	25	1.04	1.02	1.29
CM015575.1_RaGOO	7100000	41131340	3	0	0.0000	31	24	0.98	0.99	1.26
CM015575.1_RaGOO	7150000	41131340	4	3	0.0000	32	25	1.02	1.00	1.29
CM015575.1_RaGOO	7200000	41131340	2	4	0.0000	30	23	0.96	0.94	1.28
CM015575.1_RaGOO	7250000	41131340	7	3	0.0000	31	23	1.01	0.95	1.34
CM015575.1_RaGOO	7300000	41131340	1	1	0.0000	36	28	1.16	1.13	1.30
CM015575.1_RaGOO	7350000	41131340	1	1	0.0000	30	24	0.98	0.98	1.26
CM015575.1_RaGOO	7400000	41131340	1	0	0.0000	28	23	0.92	0.94	1.23
CM015575.1_RaGOO	7450000	41131340	1	3	0.0000	30	25	0.97	1.03	1.18
CM015575.1_RaGOO	7500000	41131340	0	7	0.0000	32	25	1.03	1.00	1.30
CM015575.1_RaGOO	7550000	41131340	2	0	0.0000	32	25	1.02	1.02	1.26
CM015575.1_RaGOO	7600000	41131340	6	0	0.0000	32	26	1.05	1.04	1.27
CM015575.1_RaGOO	7650000	41131340	12	1	0.0000	31	25	1.01	1.00	1.27
CM015575.1_RaGOO	7700000	41131340	1	1	0.0000	31	24	0.99	0.96	1.30
CM015575.1_RaGOO	7750000	41131340	0	0	0.0000	29	24	0.93	0.98	1.19
CM015575.1_RaGOO	7800000	41131340	0	0	0.0000	33	27	1.06	1.09	1.22
CM015575.1_RaGOO	7850000	41131340	0	0	0.0000	33	26	1.07	1.04	1.30
CM015575.1_RaGOO	7900000	41131340	0	0	0.0000	31	24	1.01	0.96	1.33
CM015575.1_RaGOO	7950000	41131340	0	0	0.0000	31	25	1.01	1.03	1.25
CM015575.1_RaGOO	8000000	41131340	0	0	0.0000	29	23	0.92	0.95	1.22
CM015575.1_RaGOO	8050000	41131340	1	0	0.0000	31	25	1.00	1.01	1.25
CM015575.1_RaGOO	8100000	41131340	1	0	0.0000	32	25	1.04	1.03	1.28
CM015575.1_RaGOO	8150000	41131340	0	0	0.0000	29	23	0.94	0.94	1.26
CM015575.1_RaGOO	8200000	41131340	0	14	0.0000	30	24	0.97	0.96	1.27
CM015575.1_RaGOO	8250000	41131340	1	0	0.0000	30	23	0.97	0.94	1.31
CM015575.1_RaGOO	8300000	41131340	0	0	0.0000	30	23	0.97	0.93	1.31
CM015575.1_RaGOO	8350000	41131340	1	0	0.0000	31	24	0.99	0.98	1.27
CM015575.1_RaGOO	8400000	41131340	11	0	0.0000	31	24	0.99	0.97	1.29
CM015575.1_RaGOO	8450000	41131340	0	0	0.0000	30	24	0.98	0.99	1.25
CM015575.1_RaGOO	8500000	41131340	1	0	0.0000	28	23	0.90	0.93	1.23
CM015575.1_RaGOO	8550000	41131340	0	0	0.0000	33	27	1.06	1.08	1.24
CM015575.1_RaGOO	8600000	41131340	0	9	0.0000	28	22	0.90	0.90	1.26
CM015575.1_RaGOO	8650000	41131340	4	4	0.0000	29	23	0.95	0.95	1.26
CM015575.1_RaGOO	8700000	41131340	2	3	0.0000	29	23	0.95	0.94	1.27
CM015575.1_RaGOO	8750000	41131340	1	6	0.0000	29	22	0.93	0.90	1.30
CM015575.1_RaGOO	8800000	41131340	3	4	0.0000	31	24	0.99	0.96	1.30
CM015575.1_RaGOO	8850000	41131340	1	0	0.0000	31	24	1.00	0.98	1.28
CM015575.1_RaGOO	8900000	41131340	0	0	0.0000	31	25	1.01	1.00	1.27
CM015575.1_RaGOO	8950000	41131340	0	1	0.0000	31	24	0.99	0.96	1.29
CM015575.1_RaGOO	9000000	41131340	0	0	0.0000	29	24	0.95	0.98	1.22
CM015575.1_RaGOO	9050000	41131340	0	4	0.0000	30	24	0.96	0.97	1.26
CM015575.1_RaGOO	9100000	41131340	0	0	0.0000	33	26	1.05	1.06	1.25
CM015575.1_RaGOO	9150000	41131340	1	0	0.0000	31	24	1.00	0.99	1.28
CM015575.1_RaGOO	9200000	41131340	1	0	0.0000	32	25	1.03	1.03	1.26
CM015575.1_RaGOO	9250000	41131340	0	2	0.0000	31	26	1.01	1.05	1.21
CM015575.1_RaGOO	9300000	41131340	1	17	0.0000	32	26	1.02	1.04	1.23
CM015575.1_RaGOO	9350000	41131340	2	0	0.0000	31	25	1.01	1.02	1.25
CM015575.1_RaGOO	9400000	41131340	0	0	0.0000	32	25	1.02	1.04	1.24
CM015575.1_RaGOO	9450000	41131340	0	0	0.0000	31	24	0.99	0.96	1.31
CM015575.1_RaGOO	9500000	41131340	1	1	0.0000	30	24	0.97	0.96	1.27
CM015575.1_RaGOO	9550000	41131340	0	0	0.0000	30	23	0.98	0.94	1.31
CM015575.1_RaGOO	9600000	41131340	5	0	0.0000	29	22	0.94	0.89	1.33
CM015575.1_RaGOO	9650000	41131340	1	0	0.0000	29	23	0.94	0.94	1.25
CM015575.1_RaGOO	9700000	41131340	2	2	0.0000	28	21	0.90	0.86	1.32
CM015575.1_RaGOO	9750000	41131340	0	0	0.0000	28	22	0.91	0.90	1.28
CM015575.1_RaGOO	9800000	41131340	1	0	0.0000	28	23	0.90	0.92	1.24
CM015575.1_RaGOO	9850000	41131340	0	2	0.0000	28	24	0.91	0.96	1.20
CM015575.1_RaGOO	9900000	41131340	1	2	0.0000	29	23	0.94	0.94	1.26
CM015575.1_RaGOO	9950000	41131340	2	0	0.0000	29	22	0.93	0.91	1.29
CM015575.1_RaGOO	10000000	41131340	1	0	0.0000	31	24	0.99	0.98	1.27
CM015575.1_RaGOO	10050000	41131340	3	0	0.0000	26	20	0.85	0.82	1.30
CM015575.1_RaGOO	10100000	41131340	36	1	0.0000	29	23	0.95	0.92	1.29
CM015575.1_RaGOO	10150000	41131340	0	0	0.0000	30	25	0.98	1.00	1.23
CM015575.1_RaGOO	10200000	41131340	0	1	0.0000	32	25	1.02	1.01	1.27
CM015575.1_RaGOO	10250000	41131340	2	0	0.0000	26	20	0.84	0.83	1.27
CM015575.1_RaGOO	10300000	41131340	0	2	0.0000	26	21	0.85	0.85	1.26
CM015575.1_RaGOO	10350000	41131340	0	2	0.0000	27	22	0.88	0.89	1.26
CM015575.1_RaGOO	10400000	41131340	0	15	0.0000	29	23	0.94	0.94	1.26
CM015575.1_RaGOO	10450000	41131340	6	0	0.0000	31	24	0.99	0.96	1.31
CM015575.1_RaGOO	10500000	41131340	2	0	0.0000	29	23	0.93	0.95	1.23
CM015575.1_RaGOO	10550000	41131340	0	3	0.0000	30	24	0.97	0.97	1.26
CM015575.1_RaGOO	10600000	41131340	2	0	0.0000	29	23	0.92	0.92	1.26
CM015575.1_RaGOO	10650000	41131340	2	1	0.0000	31	24	0.99	0.97	1.28
CM015575.1_RaGOO	10700000	41131340	2	2	0.0000	30	24	0.98	0.99	1.24
CM015575.1_RaGOO	10750000	41131340	9	1	0.0000	30	23	0.95	0.95	1.26
CM015575.1_RaGOO	10800000	41131340	0	0	0.0000	31	25	1.00	1.00	1.27
CM015575.1_RaGOO	10850000	41131340	1	0	0.0000	29	23	0.94	0.93	1.27
CM015575.1_RaGOO	10900000	41131340	1	5	0.0000	30	23	0.97	0.95	1.27
CM015575.1_RaGOO	10950000	41131340	2	3	0.0000	29	22	0.94	0.89	1.34
CM015575.1_RaGOO	11000000	41131340	0	0	0.0000	82	61	2.65	2.48	1.35
CM015575.1_RaGOO	11050000	41131340	0	1	0.0000	45	34	1.44	1.39	1.30
CM015575.1_RaGOO	11100000	41131340	0	6	0.0000	31	25	1.01	1.03	1.24
CM015575.1_RaGOO	11150000	41131340	2	0	0.0000	31	25	1.01	1.02	1.25
CM015575.1_RaGOO	11200000	41131340	1	4	0.0000	31	25	1.01	1.03	1.23
CM015575.1_RaGOO	11250000	41131340	2	3	0.0000	28	22	0.91	0.91	1.27
CM015575.1_RaGOO	11300000	41131340	1	0	0.0000	30	23	0.95	0.96	1.26
CM015575.1_RaGOO	11350000	41131340	1	0	0.0000	31	24	1.01	0.99	1.29
CM015575.1_RaGOO	11400000	41131340	3	0	0.0000	30	23	0.97	0.95	1.29
CM015575.1_RaGOO	11450000	41131340	1	2	0.0000	32	26	1.04	1.07	1.23
CM015575.1_RaGOO	11500000	41131340	0	2	0.0000	30	23	0.97	0.95	1.29
CM015575.1_RaGOO	11550000	41131340	0	4	0.0000	30	24	0.97	0.97	1.25
CM015575.1_RaGOO	11600000	41131340	3	2	0.0000	30	24	0.97	0.99	1.24
CM015575.1_RaGOO	11650000	41131340	0	4	0.0000	31	25	0.98	1.00	1.24
CM015575.1_RaGOO	11700000	41131340	1	0	0.0000	30	23	0.95	0.95	1.26
CM015575.1_RaGOO	11750000	41131340	0	6	0.0000	27	21	0.86	0.87	1.24
CM015575.1_RaGOO	11800000	41131340	0	12	0.0000	29	23	0.92	0.93	1.26
CM015575.1_RaGOO	11850000	41131340	1	2	0.0000	31	25	1.01	1.01	1.26
CM015575.1_RaGOO	11900000	41131340	9	4	0.0000	27	21	0.86	0.85	1.29
CM015575.1_RaGOO	11950000	41131340	0	1	0.0000	28	21	0.90	0.87	1.29
CM015575.1_RaGOO	12000000	41131340	2	9	0.0000	27	21	0.87	0.86	1.29
CM015575.1_RaGOO	12050000	41131340	0	1	0.0000	26	21	0.83	0.85	1.22
CM015575.1_RaGOO	12100000	41131340	1	0	0.0000	28	22	0.89	0.88	1.28
CM015575.1_RaGOO	12150000	41131340	3	0	0.0000	29	24	0.92	0.97	1.21
CM015575.1_RaGOO	12200000	41131340	3	1	0.0000	28	23	0.92	0.92	1.26
CM015575.1_RaGOO	12250000	41131340	1	0	0.0000	29	23	0.93	0.92	1.27
CM015575.1_RaGOO	12300000	41131340	7	0	0.0000	28	22	0.92	0.91	1.27
CM015575.1_RaGOO	12350000	41131340	1	2	0.0000	29	22	0.93	0.90	1.30
CM015575.1_RaGOO	12400000	41131340	8	1	0.0000	29	24	0.94	0.98	1.21
CM015575.1_RaGOO	12450000	41131340	1	0	0.0000	28	22	0.91	0.91	1.26
CM015575.1_RaGOO	12500000	41131340	1	1	0.0000	31	24	0.99	0.98	1.27
CM015575.1_RaGOO	12550000	41131340	0	0	0.0000	33	25	1.06	1.03	1.30
CM015575.1_RaGOO	12600000	41131340	2	0	0.0000	27	22	0.88	0.90	1.24
CM015575.1_RaGOO	12650000	41131340	2	0	0.0000	31	25	1.00	1.02	1.23
CM015575.1_RaGOO	12700000	41131340	3	4	0.0000	26	21	0.84	0.86	1.24
CM015575.1_RaGOO	12750000	41131340	20	6	0.0000	30	23	0.96	0.95	1.27
CM015575.1_RaGOO	12800000	41131340	2	2	0.0000	30	23	0.95	0.93	1.29
CM015575.1_RaGOO	12850000	41131340	0	0	0.0000	28	23	0.90	0.92	1.23
CM015575.1_RaGOO	12900000	41131340	1	0	0.0000	28	22	0.89	0.88	1.28
CM015575.1_RaGOO	12950000	41131340	0	2	0.0000	29	21	0.92	0.87	1.33
CM015575.1_RaGOO	13000000	41131340	10	0	0.0000	27	22	0.87	0.88	1.24
CM015575.1_RaGOO	13050000	41131340	1	0	0.0000	28	23	0.91	0.93	1.24
CM015575.1_RaGOO	13100000	41131340	0	0	0.0000	28	22	0.89	0.89	1.27
CM015575.1_RaGOO	13150000	41131340	1	0	0.0000	30	23	0.98	0.95	1.30
CM015575.1_RaGOO	13200000	41131340	0	6	0.0000	29	22	0.92	0.91	1.27
CM015575.1_RaGOO	13250000	41131340	1	3	0.0000	30	23	0.96	0.94	1.29
CM015575.1_RaGOO	13300000	41131340	0	1	0.0000	29	22	0.94	0.91	1.30
CM015575.1_RaGOO	13350000	41131340	3	5	0.0000	26	21	0.84	0.87	1.21
CM015575.1_RaGOO	13400000	41131340	0	4	0.0000	30	23	0.98	0.94	1.31
CM015575.1_RaGOO	13450000	41131340	11	13	0.0000	29	24	0.93	0.97	1.22
CM015575.1_RaGOO	13500000	41131340	1	0	0.0000	29	24	0.95	0.97	1.24
CM015575.1_RaGOO	13550000	41131340	3	5	0.0000	30	23	0.96	0.94	1.29
CM015575.1_RaGOO	13600000	41131340	7	0	0.0000	32	25	1.02	1.03	1.25
CM015575.1_RaGOO	13650000	41131340	5	2	0.0000	30	24	0.96	0.98	1.23
CM015575.1_RaGOO	13700000	41131340	0	0	0.0000	29	24	0.92	0.96	1.21
CM015575.1_RaGOO	13750000	41131340	6	1	0.0000	32	26	1.04	1.05	1.26
CM015575.1_RaGOO	13800000	41131340	1	1	0.0000	31	24	0.99	0.99	1.26
CM015575.1_RaGOO	13850000	41131340	0	0	0.0000	30	24	0.95	0.98	1.22
CM015575.1_RaGOO	13900000	41131340	4	4	0.0000	30	23	0.95	0.94	1.27
CM015575.1_RaGOO	13950000	41131340	0	0	0.0000	34	28	1.09	1.13	1.22
CM015575.1_RaGOO	14000000	41131340	0	1	0.0000	29	23	0.93	0.93	1.26
CM015575.1_RaGOO	14050000	41131340	1	0	0.0000	31	24	1.00	0.97	1.30
CM015575.1_RaGOO	14100000	41131340	1	0	0.0000	29	24	0.94	0.96	1.23
CM015575.1_RaGOO	14150000	41131340	0	0	0.0000	29	22	0.93	0.90	1.31
CM015575.1_RaGOO	14200000	41131340	2	12	0.0000	31	24	0.99	0.96	1.30
CM015575.1_RaGOO	14250000	41131340	0	0	0.0000	29	23	0.93	0.93	1.25
CM015575.1_RaGOO	14300000	41131340	0	7	0.0000	28	22	0.90	0.90	1.25
CM015575.1_RaGOO	14350000	41131340	0	27	0.0000	29	23	0.92	0.91	1.27
CM015575.1_RaGOO	14400000	41131340	4	11	0.0000	30	24	0.97	0.96	1.28
CM015575.1_RaGOO	14450000	41131340	0	1	0.0000	30	23	0.97	0.94	1.30
CM015575.1_RaGOO	14500000	41131340	1	0	0.0000	30	24	0.97	0.97	1.27
CM015575.1_RaGOO	14550000	41131340	0	2	0.0000	30	23	0.97	0.92	1.33
CM015575.1_RaGOO	14600000	41131340	5	1	0.0000	31	24	0.99	0.97	1.28
CM015575.1_RaGOO	14650000	41131340	6	0	0.0000	31	24	1.00	0.99	1.27
CM015575.1_RaGOO	14700000	41131340	3	1	0.0000	31	23	1.00	0.95	1.33
CM015575.1_RaGOO	14750000	41131340	2	0	0.0000	29	24	0.95	0.96	1.24
CM015575.1_RaGOO	14800000	41131340	0	1	0.0000	29	22	0.94	0.91	1.30
CM015575.1_RaGOO	14850000	41131340	0	3	0.0000	30	25	0.96	1.00	1.20
CM015575.1_RaGOO	14900000	41131340	1	0	0.0000	33	26	1.07	1.05	1.28
CM015575.1_RaGOO	14950000	41131340	0	1	0.0000	49	36	1.57	1.45	1.37
CM015575.1_RaGOO	15000000	41131340	0	0	0.0000	29	24	0.93	0.96	1.22
CM015575.1_RaGOO	15050000	41131340	0	1	0.0000	24	20	0.77	0.81	1.20
CM015575.1_RaGOO	15100000	41131340	0	0	0.0000	28	22	0.90	0.91	1.24
CM015575.1_RaGOO	15150000	41131340	0	2	0.0000	26	21	0.84	0.87	1.21
CM015575.1_RaGOO	15200000	41131340	0	1	0.0000	26	21	0.84	0.86	1.24
CM015575.1_RaGOO	15250000	41131340	3	0	0.0000	27	21	0.86	0.87	1.26
CM015575.1_RaGOO	15300000	41131340	0	0	0.0000	27	22	0.86	0.89	1.22
CM015575.1_RaGOO	15350000	41131340	2	4	0.0000	28	22	0.90	0.91	1.25
CM015575.1_RaGOO	15400000	41131340	3	7	0.0000	27	22	0.86	0.88	1.23
CM015575.1_RaGOO	15450000	41131340	1	0	0.0000	28	23	0.91	0.94	1.22
CM015575.1_RaGOO	15500000	41131340	1	3	0.0000	29	23	0.95	0.93	1.29
CM015575.1_RaGOO	15550000	41131340	3	5	0.0000	27	23	0.86	0.92	1.17
CM015575.1_RaGOO	15600000	41131340	1	0	0.0000	29	23	0.94	0.94	1.27
CM015575.1_RaGOO	15650000	41131340	3	1	0.0000	29	22	0.92	0.91	1.28
CM015575.1_RaGOO	15700000	41131340	0	0	0.0000	29	23	0.93	0.95	1.24
CM015575.1_RaGOO	15750000	41131340	2	0	0.0000	30	24	0.98	0.97	1.27
CM015575.1_RaGOO	15800000	41131340	0	0	0.0000	30	24	0.97	0.98	1.25
CM015575.1_RaGOO	15850000	41131340	0	0	0.0000	29	23	0.93	0.93	1.26
CM015575.1_RaGOO	15900000	41131340	0	0	0.0000	29	23	0.93	0.95	1.23
CM015575.1_RaGOO	15950000	41131340	5	3	0.0000	27	23	0.88	0.93	1.20
CM015575.1_RaGOO	16000000	41131340	0	0	0.0000	30	24	0.96	0.99	1.22
CM015575.1_RaGOO	16050000	41131340	0	0	0.0000	29	23	0.95	0.93	1.29
CM015575.1_RaGOO	16100000	41131340	1	1	0.0000	30	24	0.97	0.97	1.26
CM015575.1_RaGOO	16150000	41131340	10	2	0.0000	31	25	1.00	1.02	1.24
CM015575.1_RaGOO	16200000	41131340	1	2	0.0000	32	24	1.03	0.99	1.32
CM015575.1_RaGOO	16250000	41131340	7	1	0.0000	30	24	0.97	0.97	1.26
CM015575.1_RaGOO	16300000	41131340	1	0	0.0000	29	23	0.92	0.94	1.23
CM015575.1_RaGOO	16350000	41131340	14	1	0.0000	31	24	1.01	0.99	1.29
CM015575.1_RaGOO	16400000	41131340	0	0	0.0000	27	23	0.87	0.92	1.19
CM015575.1_RaGOO	16450000	41131340	0	1	0.0000	27	21	0.89	0.87	1.28
CM015575.1_RaGOO	16500000	41131340	0	1	0.0000	27	22	0.88	0.88	1.26
CM015575.1_RaGOO	16550000	41131340	0	2	0.0000	26	22	0.84	0.88	1.20
CM015575.1_RaGOO	16600000	41131340	0	2	0.0000	53	42	1.72	1.71	1.27
CM015575.1_RaGOO	16650000	41131340	1	2	0.0000	27	21	0.88	0.87	1.28
CM015575.1_RaGOO	16700000	41131340	0	2	0.0000	31	25	1.01	1.01	1.25
CM015575.1_RaGOO	16750000	41131340	0	0	0.0000	29	24	0.95	0.96	1.25
CM015575.1_RaGOO	16800000	41131340	3	4	0.0000	29	23	0.95	0.95	1.26
CM015575.1_RaGOO	16850000	41131340	1	0	0.0000	32	26	1.02	1.06	1.21
CM015575.1_RaGOO	16900000	41131340	0	0	0.0000	30	24	0.97	0.98	1.25
CM015575.1_RaGOO	16950000	41131340	1	0	0.0000	40	33	1.31	1.35	1.22
CM015575.1_RaGOO	17000000	41131340	0	0	0.0000	32	25	1.04	1.00	1.30
CM015575.1_RaGOO	17050000	41131340	0	0	0.0000	29	23	0.94	0.94	1.26
CM015575.1_RaGOO	17100000	41131340	0	0	0.0000	32	25	1.02	1.03	1.26
CM015575.1_RaGOO	17150000	41131340	1	0	0.0000	29	23	0.94	0.94	1.26
CM015575.1_RaGOO	17200000	41131340	1	0	0.0000	30	24	0.95	0.97	1.24
CM015575.1_RaGOO	17250000	41131340	1	7	0.0000	28	23	0.89	0.94	1.20
CM015575.1_RaGOO	17300000	41131340	0	0	0.0000	31	25	1.01	1.00	1.27
CM015575.1_RaGOO	17350000	41131340	7	0	0.0000	28	23	0.89	0.92	1.22
CM015575.1_RaGOO	17400000	41131340	0	0	0.0000	29	23	0.94	0.94	1.26
CM015575.1_RaGOO	17450000	41131340	0	1	0.0000	31	25	1.00	1.00	1.26
CM015575.1_RaGOO	17500000	41131340	0	0	0.0000	31	24	0.99	0.97	1.28
CM015575.1_RaGOO	17550000	41131340	13	0	0.0000	30	24	0.96	0.97	1.25
CM015575.1_RaGOO	17600000	41131340	5	0	0.0000	30	23	0.98	0.95	1.31
CM015575.1_RaGOO	17650000	41131340	0	0	0.0000	29	23	0.93	0.95	1.23
CM015575.1_RaGOO	17700000	41131340	4	0	0.0000	31	25	0.99	1.00	1.26
CM015575.1_RaGOO	17750000	41131340	3	1	0.0000	24	21	0.79	0.85	1.16
CM015575.1_RaGOO	17800000	41131340	1	3	0.0000	29	24	0.94	0.96	1.24
CM015575.1_RaGOO	17850000	41131340	0	1	0.0000	28	23	0.90	0.92	1.23
CM015575.1_RaGOO	17900000	41131340	13	0	0.0000	28	22	0.91	0.89	1.29
CM015575.1_RaGOO	17950000	41131340	1	1	0.0000	29	23	0.93	0.94	1.25
CM015575.1_RaGOO	18000000	41131340	1	0	0.0000	26	21	0.84	0.86	1.22
CM015575.1_RaGOO	18050000	41131340	1	3	0.0000	26	21	0.84	0.84	1.26
CM015575.1_RaGOO	18100000	41131340	0	6	0.0000	26	21	0.84	0.84	1.26
CM015575.1_RaGOO	18150000	41131340	2	0	0.0000	28	23	0.90	0.94	1.21
CM015575.1_RaGOO	18200000	41131340	0	3	0.0000	28	22	0.90	0.89	1.27
CM015575.1_RaGOO	18250000	41131340	0	0	0.0000	30	23	0.96	0.94	1.30
CM015575.1_RaGOO	18300000	41131340	2	0	0.0000	32	25	1.02	1.00	1.29
CM015575.1_RaGOO	18350000	41131340	1	2	0.0000	31	25	1.01	1.02	1.25
CM015575.1_RaGOO	18400000	41131340	0	0	0.0000	28	23	0.91	0.93	1.24
CM015575.1_RaGOO	18450000	41131340	0	4	0.0000	30	24	0.95	0.98	1.23
CM015575.1_RaGOO	18500000	41131340	2	0	0.0000	26	21	0.85	0.84	1.28
CM015575.1_RaGOO	18550000	41131340	2	1	0.0000	28	23	0.90	0.94	1.20
CM015575.1_RaGOO	18600000	41131340	2	3	0.0000	30	24	0.97	0.98	1.25
CM015575.1_RaGOO	18650000	41131340	1	0	0.0000	29	24	0.95	0.98	1.22
CM015575.1_RaGOO	18700000	41131340	2	1	0.0000	24	19	0.77	0.78	1.24
CM015575.1_RaGOO	18750000	41131340	0	2	0.0000	28	22	0.89	0.91	1.23
CM015575.1_RaGOO	18800000	41131340	0	0	0.0000	29	22	0.94	0.91	1.30
CM015575.1_RaGOO	18850000	41131340	0	0	0.0000	28	22	0.90	0.88	1.30
CM015575.1_RaGOO	18900000	41131340	0	5	0.0000	28	22	0.89	0.90	1.25
CM015575.1_RaGOO	18950000	41131340	0	0	0.0000	34	26	1.11	1.07	1.31
CM015575.1_RaGOO	19000000	41131340	1	0	0.0000	27	22	0.86	0.88	1.24
CM015575.1_RaGOO	19050000	41131340	1	0	0.0000	26	20	0.85	0.82	1.30
CM015575.1_RaGOO	19100000	41131340	0	0	0.0000	24	18	0.76	0.72	1.33
CM015575.1_RaGOO	19150000	41131340	0	1	0.0000	29	24	0.92	0.97	1.21
CM015575.1_RaGOO	19200000	41131340	0	0	0.0000	26	21	0.85	0.85	1.26
CM015575.1_RaGOO	19250000	41131340	0	0	0.0000	27	21	0.87	0.87	1.26
CM015575.1_RaGOO	19300000	41131340	0	0	0.0000	29	23	0.93	0.94	1.25
CM015575.1_RaGOO	19350000	41131340	1	3	0.0000	30	24	0.98	0.98	1.26
CM015575.1_RaGOO	19400000	41131340	0	4	0.0000	29	22	0.93	0.91	1.29
CM015575.1_RaGOO	19450000	41131340	0	1	0.0000	31	23	1.00	0.95	1.32
CM015575.1_RaGOO	19500000	41131340	0	0	0.0000	27	21	0.88	0.87	1.28
CM015575.1_RaGOO	19550000	41131340	0	0	0.0000	26	21	0.85	0.86	1.25
CM015575.1_RaGOO	19600000	41131340	0	12	0.0000	26	20	0.85	0.82	1.30
CM015575.1_RaGOO	19650000	41131340	0	0	0.0000	28	22	0.91	0.91	1.26
CM015575.1_RaGOO	19700000	41131340	0	0	0.0000	28	22	0.91	0.88	1.30
CM015575.1_RaGOO	19750000	41131340	0	0	0.0000	25	20	0.81	0.81	1.26
CM015575.1_RaGOO	19800000	41131340	1	0	0.0000	27	22	0.88	0.89	1.24
CM015575.1_RaGOO	19850000	41131340	0	0	0.0000	27	21	0.88	0.86	1.29
CM015575.1_RaGOO	19900000	41131340	0	0	0.0000	26	21	0.85	0.85	1.26
CM015575.1_RaGOO	19950000	41131340	0	0	0.0000	29	22	0.95	0.91	1.31
CM015575.1_RaGOO	20000000	41131340	0	0	0.0000	26	21	0.84	0.85	1.25
CM015575.1_RaGOO	20050000	41131340	1	0	0.0000	28	22	0.89	0.88	1.27
CM015575.1_RaGOO	20100000	41131340	2	0	0.0000	27	21	0.86	0.86	1.26
CM015575.1_RaGOO	20150000	41131340	2	6	0.0000	25	20	0.82	0.82	1.27
CM015575.1_RaGOO	20200000	41131340	1	29	0.0103	27	22	0.87	0.89	1.22
CM015575.1_RaGOO	20250000	41131340	1	9	0.0000	28	22	0.90	0.89	1.27
CM015575.1_RaGOO	20300000	41131340	5	19	0.0000	28	22	0.90	0.89	1.28
CM015575.1_RaGOO	20350000	41131340	2	0	0.0000	26	21	0.85	0.86	1.24
CM015575.1_RaGOO	20400000	41131340	0	1	0.0000	24	21	0.78	0.84	1.16
CM015575.1_RaGOO	20450000	41131340	0	0	0.0000	25	20	0.79	0.82	1.23
CM015575.1_RaGOO	20500000	41131340	0	1	0.0000	29	23	0.93	0.93	1.26
CM015575.1_RaGOO	20550000	41131340	0	0	0.0140	29	24	0.92	0.96	1.21
CM015575.1_RaGOO	20600000	41131340	9	2	0.0000	26	22	0.84	0.88	1.20
CM015575.1_RaGOO	20650000	41131340	11	0	0.0000	29	23	0.95	0.92	1.30
CM015575.1_RaGOO	20700000	41131340	21	0	0.0000	27	21	0.86	0.86	1.27
CM015575.1_RaGOO	20750000	41131340	0	1	0.0000	28	22	0.89	0.91	1.24
CM015575.1_RaGOO	20800000	41131340	1	8	0.0000	28	22	0.90	0.89	1.28
CM015575.1_RaGOO	20850000	41131340	0	2	0.0000	27	22	0.88	0.89	1.26
CM015575.1_RaGOO	20900000	41131340	2	4	0.0000	26	20	0.83	0.83	1.27
CM015575.1_RaGOO	20950000	41131340	5	0	0.0000	30	24	0.97	0.98	1.25
CM015575.1_RaGOO	21000000	41131340	2	0	0.0000	30	23	0.96	0.95	1.27
CM015575.1_RaGOO	21050000	41131340	1	0	0.0000	29	22	0.93	0.90	1.30
CM015575.1_RaGOO	21100000	41131340	0	6	0.0000	26	22	0.84	0.90	1.17
CM015575.1_RaGOO	21150000	41131340	1	2	0.0000	27	22	0.87	0.91	1.20
CM015575.1_RaGOO	21200000	41131340	0	1	0.0000	28	22	0.91	0.91	1.25
CM015575.1_RaGOO	21250000	41131340	5	5	0.0000	29	22	0.93	0.91	1.28
CM015575.1_RaGOO	21300000	41131340	2	3	0.0000	29	22	0.94	0.91	1.31
CM015575.1_RaGOO	21350000	41131340	3	12	0.0000	28	22	0.89	0.89	1.26
CM015575.1_RaGOO	21400000	41131340	7	9	0.0000	30	24	0.95	0.96	1.25
CM015575.1_RaGOO	21450000	41131340	0	0	0.0000	30	24	0.95	0.96	1.25
CM015575.1_RaGOO	21500000	41131340	0	1	0.0000	29	23	0.92	0.93	1.25
CM015575.1_RaGOO	21550000	41131340	0	0	0.0000	31	25	0.99	1.00	1.25
CM015575.1_RaGOO	21600000	41131340	0	0	0.0000	30	23	0.97	0.92	1.33
CM015575.1_RaGOO	21650000	41131340	0	0	0.0000	32	25	1.03	1.00	1.30
CM015575.1_RaGOO	21700000	41131340	1	8	0.0000	30	24	0.97	0.97	1.26
CM015575.1_RaGOO	21750000	41131340	6	9	0.0000	30	25	0.98	1.02	1.21
CM015575.1_RaGOO	21800000	41131340	0	0	0.0000	30	24	0.96	0.99	1.23
CM015575.1_RaGOO	21850000	41131340	0	0	0.0000	28	23	0.90	0.94	1.21
CM015575.1_RaGOO	21900000	41131340	11	1	0.0000	28	23	0.92	0.93	1.24
CM015575.1_RaGOO	21950000	41131340	0	2	0.0000	27	22	0.88	0.88	1.26
CM015575.1_RaGOO	22000000	41131340	1	2	0.0000	27	22	0.88	0.89	1.25
CM015575.1_RaGOO	22050000	41131340	0	0	0.0000	31	25	1.01	1.00	1.27
CM015575.1_RaGOO	22100000	41131340	2	0	0.0000	27	22	0.86	0.88	1.23
CM015575.1_RaGOO	22150000	41131340	0	0	0.0000	29	23	0.93	0.93	1.27
CM015575.1_RaGOO	22200000	41131340	0	3	0.0000	31	25	1.01	1.03	1.23
CM015575.1_RaGOO	22250000	41131340	0	6	0.0000	31	24	0.99	0.98	1.28
CM015575.1_RaGOO	22300000	41131340	0	0	0.0000	31	26	0.99	1.04	1.20
CM015575.1_RaGOO	22350000	41131340	2	1	0.0000	30	24	0.97	0.98	1.25
CM015575.1_RaGOO	22400000	41131340	3	0	0.0000	31	24	0.99	0.96	1.30
CM015575.1_RaGOO	22450000	41131340	0	0	0.0000	31	25	1.00	1.01	1.25
CM015575.1_RaGOO	22500000	41131340	5	0	0.0000	30	24	0.96	0.97	1.24
CM015575.1_RaGOO	22550000	41131340	3	0	0.0000	31	25	1.00	1.02	1.23
CM015575.1_RaGOO	22600000	41131340	0	0	0.0000	29	23	0.93	0.94	1.24
CM015575.1_RaGOO	22650000	41131340	0	0	0.0000	31	25	0.99	1.01	1.25
CM015575.1_RaGOO	22700000	41131340	0	0	0.0000	29	24	0.94	0.97	1.23
CM015575.1_RaGOO	22750000	41131340	0	0	0.0000	32	27	1.02	1.08	1.19
CM015575.1_RaGOO	22800000	41131340	0	1	0.0000	29	23	0.92	0.93	1.24
CM015575.1_RaGOO	22850000	41131340	2	0	0.0000	29	23	0.94	0.93	1.27
CM015575.1_RaGOO	22900000	41131340	0	0	0.0000	33	25	1.05	1.02	1.30
CM015575.1_RaGOO	22950000	41131340	16	3	0.0000	31	25	1.00	1.00	1.26
CM015575.1_RaGOO	23000000	41131340	0	0	0.0000	32	25	1.02	1.02	1.26
CM015575.1_RaGOO	23050000	41131340	0	0	0.0000	31	25	1.01	1.02	1.26
CM015575.1_RaGOO	23100000	41131340	0	0	0.0000	31	24	1.00	0.96	1.31
CM015575.1_RaGOO	23150000	41131340	0	0	0.0000	30	25	0.96	1.03	1.18
CM015575.1_RaGOO	23200000	41131340	0	0	0.0000	29	23	0.95	0.93	1.29
CM015575.1_RaGOO	23250000	41131340	0	0	0.0000	31	25	1.00	1.01	1.25
CM015575.1_RaGOO	23300000	41131340	1	9	0.0000	31	25	1.01	1.01	1.26
CM015575.1_RaGOO	23350000	41131340	0	1	0.0000	27	22	0.88	0.91	1.22
CM015575.1_RaGOO	23400000	41131340	1	1	0.0000	31	26	1.00	1.04	1.22
CM015575.1_RaGOO	23450000	41131340	0	7	0.0000	32	25	1.03	1.04	1.26
CM015575.1_RaGOO	23500000	41131340	0	1	0.0000	30	24	0.98	0.98	1.25
CM015575.1_RaGOO	23550000	41131340	0	0	0.0000	31	25	0.98	1.01	1.23
CM015575.1_RaGOO	23600000	41131340	0	2	0.0000	29	24	0.94	0.97	1.22
CM015575.1_RaGOO	23650000	41131340	0	0	0.0000	30	24	0.98	0.97	1.27
CM015575.1_RaGOO	23700000	41131340	2	0	0.0000	30	24	0.98	0.96	1.28
CM015575.1_RaGOO	23750000	41131340	4	4	0.0000	30	24	0.98	0.98	1.25
CM015575.1_RaGOO	23800000	41131340	1	3	0.0000	30	24	0.98	0.96	1.28
CM015575.1_RaGOO	23850000	41131340	7	4	0.0000	31	24	1.00	0.97	1.30
CM015575.1_RaGOO	23900000	41131340	1	5	0.0000	31	24	1.01	0.99	1.28
CM015575.1_RaGOO	23950000	41131340	0	1	0.0000	33	26	1.05	1.06	1.26
CM015575.1_RaGOO	24000000	41131340	5	2	0.0000	32	26	1.04	1.06	1.24
CM015575.1_RaGOO	24050000	41131340	2	2	0.0000	30	24	0.97	0.97	1.26
CM015575.1_RaGOO	24100000	41131340	0	1	0.0000	30	23	0.96	0.92	1.31
CM015575.1_RaGOO	24150000	41131340	1	2	0.0000	31	24	0.99	0.97	1.28
CM015575.1_RaGOO	24200000	41131340	0	0	0.0000	32	24	1.02	0.97	1.33
CM015575.1_RaGOO	24250000	41131340	2	1	0.0000	32	25	1.04	1.03	1.28
CM015575.1_RaGOO	24300000	41131340	0	0	0.0000	28	23	0.91	0.92	1.24
CM015575.1_RaGOO	24350000	41131340	4	0	0.0000	29	23	0.93	0.94	1.25
CM015575.1_RaGOO	24400000	41131340	1	0	0.0000	29	23	0.94	0.94	1.26
CM015575.1_RaGOO	24450000	41131340	3	0	0.0000	29	23	0.94	0.95	1.25
CM015575.1_RaGOO	24500000	41131340	1	0	0.0000	29	24	0.95	0.99	1.22
CM015575.1_RaGOO	24550000	41131340	0	0	0.0000	30	23	0.95	0.94	1.28
CM015575.1_RaGOO	24600000	41131340	0	0	0.0000	28	24	0.90	0.96	1.19
CM015575.1_RaGOO	24650000	41131340	0	1	0.0000	28	23	0.92	0.93	1.24
CM015575.1_RaGOO	24700000	41131340	0	0	0.0000	27	22	0.88	0.89	1.25
CM015575.1_RaGOO	24750000	41131340	1	0	0.0000	27	22	0.88	0.91	1.23
CM015575.1_RaGOO	24800000	41131340	0	2	0.0000	29	23	0.92	0.94	1.24
CM015575.1_RaGOO	24850000	41131340	3	1	0.0000	29	23	0.92	0.94	1.24
CM015575.1_RaGOO	24900000	41131340	1	0	0.0000	28	23	0.91	0.94	1.23
CM015575.1_RaGOO	24950000	41131340	1	0	0.0000	30	24	0.96	0.97	1.25
CM015575.1_RaGOO	25000000	41131340	2	0	0.0000	27	23	0.88	0.92	1.20
CM015575.1_RaGOO	25050000	41131340	0	0	0.0000	29	22	0.93	0.89	1.32
CM015575.1_RaGOO	25100000	41131340	0	0	0.0000	27	23	0.87	0.92	1.19
CM015575.1_RaGOO	25150000	41131340	0	6	0.0000	26	22	0.84	0.88	1.21
CM015575.1_RaGOO	25200000	41131340	5	4	0.0000	28	23	0.91	0.93	1.24
CM015575.1_RaGOO	25250000	41131340	3	2	0.0000	28	22	0.90	0.90	1.26
CM015575.1_RaGOO	25300000	41131340	0	2	0.0000	25	21	0.79	0.85	1.17
CM015575.1_RaGOO	25350000	41131340	2	0	0.0000	55	41	1.76	1.69	1.32
CM015575.1_RaGOO	25400000	41131340	0	0	0.0000	31	25	0.99	1.01	1.23
CM015575.1_RaGOO	25450000	41131340	2	0	0.0000	29	23	0.95	0.93	1.28
CM015575.1_RaGOO	25500000	41131340	0	1	0.0000	30	24	0.96	0.96	1.26
CM015575.1_RaGOO	25550000	41131340	3	0	0.0000	31	23	1.00	0.95	1.32
CM015575.1_RaGOO	25600000	41131340	1	0	0.0000	31	25	1.00	1.00	1.27
CM015575.1_RaGOO	25650000	41131340	1	1	0.0000	29	23	0.94	0.95	1.25
CM015575.1_RaGOO	25700000	41131340	0	0	0.0000	31	25	1.00	1.00	1.26
CM015575.1_RaGOO	25750000	41131340	0	0	0.0000	29	24	0.94	0.99	1.21
CM015575.1_RaGOO	25800000	41131340	2	0	0.0000	28	22	0.91	0.91	1.26
CM015575.1_RaGOO	25850000	41131340	1	1	0.0000	31	24	1.00	0.98	1.28
CM015575.1_RaGOO	25900000	41131340	2	7	0.0000	30	23	0.97	0.95	1.29
CM015575.1_RaGOO	25950000	41131340	10	2	0.0000	29	23	0.94	0.92	1.28
CM015575.1_RaGOO	26000000	41131340	0	0	0.0000	31	25	1.00	1.02	1.23
CM015575.1_RaGOO	26050000	41131340	0	0	0.0000	30	24	0.98	0.99	1.25
CM015575.1_RaGOO	26100000	41131340	0	0	0.0000	30	24	0.97	0.98	1.25
CM015575.1_RaGOO	26150000	41131340	1	3	0.0000	29	23	0.93	0.93	1.26
CM015575.1_RaGOO	26200000	41131340	0	0	0.0000	31	25	1.00	1.00	1.27
CM015575.1_RaGOO	26250000	41131340	0	1	0.0000	30	24	0.97	0.97	1.26
CM015575.1_RaGOO	26300000	41131340	3	2	0.0000	26	20	0.82	0.82	1.27
CM015575.1_RaGOO	26350000	41131340	2	0	0.0000	26	21	0.85	0.85	1.26
CM015575.1_RaGOO	26400000	41131340	0	0	0.0000	29	24	0.93	0.98	1.19
CM015575.1_RaGOO	26450000	41131340	7	7	0.0000	29	23	0.94	0.93	1.28
CM015575.1_RaGOO	26500000	41131340	0	0	0.0000	29	23	0.95	0.94	1.27
CM015575.1_RaGOO	26550000	41131340	0	2	0.0000	32	24	1.04	0.99	1.32
CM015575.1_RaGOO	26600000	41131340	4	9	0.0000	41	32	1.32	1.28	1.29
CM015575.1_RaGOO	26650000	41131340	2	2	0.0000	31	24	0.99	0.98	1.28
CM015575.1_RaGOO	26700000	41131340	0	1	0.0000	29	22	0.94	0.91	1.29
CM015575.1_RaGOO	26750000	41131340	0	2	0.0000	29	23	0.92	0.94	1.24
CM015575.1_RaGOO	26800000	41131340	2	0	0.0000	27	22	0.87	0.88	1.24
CM015575.1_RaGOO	26850000	41131340	0	0	0.0000	32	25	1.03	1.01	1.28
CM015575.1_RaGOO	26900000	41131340	0	9	0.0000	29	24	0.93	0.96	1.22
CM015575.1_RaGOO	26950000	41131340	1	0	0.0000	33	26	1.08	1.05	1.29
CM015575.1_RaGOO	27000000	41131340	0	7	0.0000	28	22	0.91	0.91	1.26
CM015575.1_RaGOO	27050000	41131340	1	0	0.0000	31	25	0.99	1.01	1.24
CM015575.1_RaGOO	27100000	41131340	0	0	0.0000	30	23	0.96	0.95	1.28
CM015575.1_RaGOO	27150000	41131340	1	3	0.0000	27	21	0.86	0.87	1.25
CM015575.1_RaGOO	27200000	41131340	1	5	0.0000	30	24	0.95	0.98	1.23
CM015575.1_RaGOO	27250000	41131340	1	6	0.0000	24	19	0.78	0.76	1.29
CM015575.1_RaGOO	27300000	41131340	0	1	0.0000	31	24	1.01	0.99	1.29
CM015575.1_RaGOO	27350000	41131340	4	0	0.0000	31	23	0.99	0.95	1.31
CM015575.1_RaGOO	27400000	41131340	1	2	0.0000	30	25	0.97	1.02	1.20
CM015575.1_RaGOO	27450000	41131340	0	1	0.0000	31	25	1.00	1.00	1.27
CM015575.1_RaGOO	27500000	41131340	1	0	0.0000	31	24	0.99	0.99	1.27
CM015575.1_RaGOO	27550000	41131340	1	2	0.0000	30	24	0.95	0.96	1.25
CM015575.1_RaGOO	27600000	41131340	5	4	0.0000	30	24	0.95	0.96	1.25
CM015575.1_RaGOO	27650000	41131340	0	0	0.0000	31	24	0.99	0.98	1.27
CM015575.1_RaGOO	27700000	41131340	1	0	0.0000	30	24	0.96	0.98	1.23
CM015575.1_RaGOO	27750000	41131340	0	0	0.0000	32	24	1.04	0.99	1.32
CM015575.1_RaGOO	27800000	41131340	0	0	0.0000	30	24	0.96	0.96	1.25
CM015575.1_RaGOO	27850000	41131340	0	0	0.0000	30	24	0.96	0.98	1.24
CM015575.1_RaGOO	27900000	41131340	0	0	0.0000	29	24	0.94	0.97	1.21
CM015575.1_RaGOO	27950000	41131340	0	4	0.0000	27	21	0.89	0.86	1.29
CM015575.1_RaGOO	28000000	41131340	0	0	0.0000	33	26	1.06	1.06	1.26
CM015575.1_RaGOO	28050000	41131340	3	1	0.0000	32	26	1.05	1.05	1.26
CM015575.1_RaGOO	28100000	41131340	0	2	0.0000	33	26	1.07	1.07	1.26
CM015575.1_RaGOO	28150000	41131340	1	1	0.0000	32	25	1.02	1.03	1.26
CM015575.1_RaGOO	28200000	41131340	1	0	0.0000	32	24	1.03	0.99	1.30
CM015575.1_RaGOO	28250000	41131340	3	1	0.0000	32	25	1.04	1.02	1.29
CM015575.1_RaGOO	28300000	41131340	2	1	0.0000	33	26	1.06	1.04	1.28
CM015575.1_RaGOO	28350000	41131340	0	4	0.0000	32	25	1.04	1.01	1.29
CM015575.1_RaGOO	28400000	41131340	1	2	0.0000	32	25	1.04	1.02	1.29
CM015575.1_RaGOO	28450000	41131340	0	0	0.0000	28	23	0.91	0.95	1.22
CM015575.1_RaGOO	28500000	41131340	1	1	0.0000	76	62	2.45	2.51	1.23
CM015575.1_RaGOO	28550000	41131340	0	0	0.0000	32	26	1.03	1.05	1.24
CM015575.1_RaGOO	28600000	41131340	0	9	0.0000	30	24	0.98	1.00	1.24
CM015575.1_RaGOO	28650000	41131340	2	0	0.0000	29	23	0.93	0.94	1.24
CM015575.1_RaGOO	28700000	41131340	0	0	0.0000	29	22	0.94	0.89	1.34
CM015575.1_RaGOO	28750000	41131340	0	0	0.0000	27	22	0.85	0.88	1.22
CM015575.1_RaGOO	28800000	41131340	0	1	0.0000	30	23	0.96	0.95	1.27
CM015575.1_RaGOO	28850000	41131340	1	3	0.0000	29	23	0.92	0.93	1.25
CM015575.1_RaGOO	28900000	41131340	0	0	0.0000	30	24	0.96	0.96	1.26
CM015575.1_RaGOO	28950000	41131340	1	3	0.0000	26	21	0.85	0.86	1.25
CM015575.1_RaGOO	29000000	41131340	5	0	0.0000	27	22	0.86	0.89	1.22
CM015575.1_RaGOO	29050000	41131340	0	5	0.0000	29	23	0.93	0.93	1.26
CM015575.1_RaGOO	29100000	41131340	2	0	0.0000	30	23	0.98	0.94	1.31
CM015575.1_RaGOO	29150000	41131340	0	0	0.0000	49	40	1.58	1.62	1.23
CM015575.1_RaGOO	29200000	41131340	0	1	0.0000	26	22	0.85	0.88	1.21
CM015575.1_RaGOO	29250000	41131340	1	0	0.0000	30	24	0.97	0.96	1.27
CM015575.1_RaGOO	29300000	41131340	1	0	0.0000	28	24	0.91	0.96	1.20
CM015575.1_RaGOO	29350000	41131340	5	6	0.0000	30	24	0.98	0.99	1.25
CM015575.1_RaGOO	29400000	41131340	1	2	0.0000	27	22	0.86	0.89	1.23
CM015575.1_RaGOO	29450000	41131340	0	7	0.0000	42	33	1.37	1.36	1.27
CM015575.1_RaGOO	29500000	41131340	0	0	0.0000	29	22	0.93	0.89	1.32
CM015575.1_RaGOO	29550000	41131340	0	0	0.0000	31	26	1.00	1.05	1.21
CM015575.1_RaGOO	29600000	41131340	1	0	0.0000	29	22	0.95	0.91	1.31
CM015575.1_RaGOO	29650000	41131340	0	0	0.0000	26	22	0.84	0.89	1.20
CM015575.1_RaGOO	29700000	41131340	1	7	0.0000	20	16	0.65	0.65	1.26
CM015575.1_RaGOO	29750000	41131340	0	0	0.0000	29	23	0.93	0.92	1.27
CM015575.1_RaGOO	29800000	41131340	0	0	0.0000	44	35	1.43	1.42	1.28
CM015575.1_RaGOO	29850000	41131340	0	3	0.0000	27	21	0.87	0.86	1.27
CM015575.1_RaGOO	29900000	41131340	0	3	0.0000	29	23	0.93	0.94	1.25
CM015575.1_RaGOO	29950000	41131340	1	5	0.0000	27	22	0.87	0.88	1.25
CM015575.1_RaGOO	30000000	41131340	1	0	0.0000	27	21	0.88	0.86	1.28
CM015575.1_RaGOO	30050000	41131340	8	1	0.0000	24	19	0.79	0.79	1.26
CM015575.1_RaGOO	30100000	41131340	1	2	0.0000	28	22	0.90	0.88	1.29
CM015575.1_RaGOO	30150000	41131340	0	0	0.0000	27	21	0.88	0.85	1.30
CM015575.1_RaGOO	30200000	41131340	2	0	0.0000	30	24	0.97	0.96	1.27
CM015575.1_RaGOO	30250000	41131340	0	2	0.0000	27	21	0.89	0.87	1.29
CM015575.1_RaGOO	30300000	41131340	0	0	0.0000	26	20	0.83	0.82	1.27
CM015575.1_RaGOO	30350000	41131340	0	0	0.0000	27	21	0.86	0.86	1.27
CM015575.1_RaGOO	30400000	41131340	1	1	0.0000	25	20	0.82	0.83	1.24
CM015575.1_RaGOO	30450000	41131340	0	0	0.0000	28	22	0.89	0.91	1.24
CM015575.1_RaGOO	30500000	41131340	1	1	0.0000	28	22	0.89	0.91	1.23
CM015575.1_RaGOO	30550000	41131340	1	0	0.0000	30	24	0.97	0.97	1.26
CM015575.1_RaGOO	30600000	41131340	3	2	0.0000	34	26	1.08	1.07	1.28
CM015575.1_RaGOO	30650000	41131340	1	0	0.0000	30	23	0.96	0.93	1.29
CM015575.1_RaGOO	30700000	41131340	14	3	0.0000	29	24	0.92	0.96	1.21
CM015575.1_RaGOO	30750000	41131340	0	0	0.0000	31	25	1.01	1.01	1.26
CM015575.1_RaGOO	30800000	41131340	1	0	0.0000	30	24	0.96	0.96	1.26
CM015575.1_RaGOO	30850000	41131340	1	0	0.0000	30	23	0.97	0.95	1.29
CM015575.1_RaGOO	30900000	41131340	3	1	0.0000	33	25	1.06	1.01	1.32
CM015575.1_RaGOO	30950000	41131340	0	0	0.0000	63	51	2.03	2.07	1.23
CM015575.1_RaGOO	31000000	41131340	0	11	0.0000	30	24	0.96	0.97	1.25
CM015575.1_RaGOO	31050000	41131340	5	1	0.0000	31	25	0.99	1.00	1.24
CM015575.1_RaGOO	31100000	41131340	0	0	0.0000	29	22	0.94	0.91	1.30
CM015575.1_RaGOO	31150000	41131340	3	0	0.0000	29	23	0.93	0.93	1.26
CM015575.1_RaGOO	31200000	41131340	5	0	0.0000	30	23	0.97	0.93	1.32
CM015575.1_RaGOO	31250000	41131340	0	0	0.0000	26	21	0.84	0.85	1.24
CM015575.1_RaGOO	31300000	41131340	0	0	0.0000	31	25	1.01	1.01	1.26
CM015575.1_RaGOO	31350000	41131340	0	0	0.0000	30	24	0.97	0.96	1.27
CM015575.1_RaGOO	31400000	41131340	0	0	0.0000	29	23	0.94	0.95	1.25
CM015575.1_RaGOO	31450000	41131340	1	0	0.0000	28	22	0.92	0.91	1.27
CM015575.1_RaGOO	31500000	41131340	1	0	0.0000	28	22	0.90	0.89	1.28
CM015575.1_RaGOO	31550000	41131340	0	0	0.0000	30	24	0.97	0.98	1.25
CM015575.1_RaGOO	31600000	41131340	0	1	0.0000	29	24	0.94	0.97	1.22
CM015575.1_RaGOO	31650000	41131340	1	2	0.0000	30	24	0.98	0.96	1.29
CM015575.1_RaGOO	31700000	41131340	0	0	0.0000	30	24	0.96	0.97	1.25
CM015575.1_RaGOO	31750000	41131340	0	0	0.0000	33	26	1.05	1.08	1.23
CM015575.1_RaGOO	31800000	41131340	1	0	0.0000	31	25	1.01	1.02	1.25
CM015575.1_RaGOO	31850000	41131340	0	1	0.0000	28	23	0.90	0.92	1.24
CM015575.1_RaGOO	31900000	41131340	3	1	0.0000	33	24	1.06	1.00	1.34
CM015575.1_RaGOO	31950000	41131340	1	1	0.0000	32	26	1.03	1.04	1.25
CM015575.1_RaGOO	32000000	41131340	3	3	0.0000	31	24	1.00	0.96	1.30
CM015575.1_RaGOO	32050000	41131340	0	1	0.0000	30	23	0.98	0.95	1.29
CM015575.1_RaGOO	32100000	41131340	2	0	0.0000	30	23	0.97	0.94	1.30
CM015575.1_RaGOO	32150000	41131340	6	1	0.0000	32	26	1.02	1.04	1.24
CM015575.1_RaGOO	32200000	41131340	1	1	0.0000	31	24	0.99	0.98	1.28
CM015575.1_RaGOO	32250000	41131340	1	0	0.0000	30	25	0.97	1.01	1.21
CM015575.1_RaGOO	32300000	41131340	0	0	0.0000	31	25	1.00	1.01	1.25
CM015575.1_RaGOO	32350000	41131340	1	0	0.0000	32	25	1.03	1.03	1.26
CM015575.1_RaGOO	32400000	41131340	0	2	0.0000	30	24	0.96	0.96	1.27
CM015575.1_RaGOO	32450000	41131340	1	0	0.0000	32	26	1.02	1.04	1.24
CM015575.1_RaGOO	32500000	41131340	2	0	0.0000	32	25	1.03	1.01	1.28
CM015575.1_RaGOO	32550000	41131340	3	0	0.0000	33	26	1.05	1.07	1.25
CM015575.1_RaGOO	32600000	41131340	1	0	0.0000	31	24	1.01	0.98	1.29
CM015575.1_RaGOO	32650000	41131340	11	0	0.0000	29	23	0.93	0.95	1.23
CM015575.1_RaGOO	32700000	41131340	18	0	0.0000	30	23	0.97	0.95	1.29
CM015575.1_RaGOO	32750000	41131340	0	0	0.0000	31	25	1.00	1.01	1.25
CM015575.1_RaGOO	32800000	41131340	2	0	0.0000	32	25	1.04	1.01	1.30
CM015575.1_RaGOO	32850000	41131340	7	4	0.0000	32	25	1.02	1.02	1.26
CM015575.1_RaGOO	32900000	41131340	1	1	0.0000	30	24	0.96	0.99	1.22
CM015575.1_RaGOO	32950000	41131340	1	3	0.0000	28	23	0.90	0.92	1.24
CM015575.1_RaGOO	33000000	41131340	0	0	0.0000	29	23	0.95	0.95	1.26
CM015575.1_RaGOO	33050000	41131340	0	0	0.0000	30	24	0.96	0.97	1.25
CM015575.1_RaGOO	33100000	41131340	4	2	0.0000	30	24	0.98	0.96	1.29
CM015575.1_RaGOO	33150000	41131340	6	1	0.0000	29	23	0.95	0.93	1.29
CM015575.1_RaGOO	33200000	41131340	0	1	0.0000	30	23	0.97	0.95	1.29
CM015575.1_RaGOO	33250000	41131340	1	0	0.0000	32	26	1.02	1.05	1.23
CM015575.1_RaGOO	33300000	41131340	0	0	0.0000	29	23	0.92	0.94	1.24
CM015575.1_RaGOO	33350000	41131340	3	0	0.0000	28	22	0.92	0.91	1.27
CM015575.1_RaGOO	33400000	41131340	0	0	0.0000	30	24	0.96	0.97	1.24
CM015575.1_RaGOO	33450000	41131340	0	6	0.0000	30	24	0.98	1.00	1.24
CM015575.1_RaGOO	33500000	41131340	1	0	0.0000	27	22	0.89	0.89	1.26
CM015575.1_RaGOO	33550000	41131340	4	1	0.0000	31	24	1.01	0.99	1.28
CM015575.1_RaGOO	33600000	41131340	7	0	0.0000	30	23	0.96	0.95	1.27
CM015575.1_RaGOO	33650000	41131340	4	0	0.0000	32	25	1.04	1.03	1.28
CM015575.1_RaGOO	33700000	41131340	0	0	0.0000	32	26	1.04	1.05	1.25
CM015575.1_RaGOO	33750000	41131340	1	3	0.0000	32	25	1.04	1.02	1.29
CM015575.1_RaGOO	33800000	41131340	0	0	0.0000	30	24	0.98	0.97	1.28
CM015575.1_RaGOO	33850000	41131340	1	1	0.0000	29	23	0.93	0.95	1.24
CM015575.1_RaGOO	33900000	41131340	6	4	0.0000	30	23	0.96	0.95	1.28
CM015575.1_RaGOO	33950000	41131340	0	0	0.0000	29	22	0.92	0.90	1.30
CM015575.1_RaGOO	34000000	41131340	1	0	0.0000	30	23	0.95	0.93	1.30
CM015575.1_RaGOO	34050000	41131340	0	1	0.0000	33	25	1.05	1.00	1.32
CM015575.1_RaGOO	34100000	41131340	0	3	0.0000	29	23	0.93	0.94	1.24
CM015575.1_RaGOO	34150000	41131340	0	6	0.0000	30	23	0.97	0.95	1.29
CM015575.1_RaGOO	34200000	41131340	1	0	0.0000	31	25	0.99	1.02	1.22
CM015575.1_RaGOO	34250000	41131340	0	3	0.0000	31	24	0.99	0.98	1.27
CM015575.1_RaGOO	34300000	41131340	2	0	0.0000	29	23	0.95	0.95	1.26
CM015575.1_RaGOO	34350000	41131340	0	1	0.0000	27	23	0.88	0.93	1.18
CM015575.1_RaGOO	34400000	41131340	1	0	0.0000	33	26	1.07	1.06	1.27
CM015575.1_RaGOO	34450000	41131340	2	2	0.0000	28	23	0.90	0.94	1.21
CM015575.1_RaGOO	34500000	41131340	1	0	0.0000	31	24	0.99	0.98	1.27
CM015575.1_RaGOO	34550000	41131340	0	0	0.0000	28	22	0.89	0.89	1.27
CM015575.1_RaGOO	34600000	41131340	3	0	0.0000	29	23	0.93	0.93	1.26
CM015575.1_RaGOO	34650000	41131340	0	1	0.0000	28	23	0.91	0.95	1.21
CM015575.1_RaGOO	34700000	41131340	7	0	0.0000	32	25	1.03	1.02	1.27
CM015575.1_RaGOO	34750000	41131340	5	2	0.0000	29	23	0.95	0.92	1.30
CM015575.1_RaGOO	34800000	41131340	2	1	0.0000	28	22	0.91	0.89	1.29
CM015575.1_RaGOO	34850000	41131340	0	0	0.0000	17	12	0.53	0.50	1.34
CM015575.1_RaGOO	34900000	41131340	1	0	0.0000	25	20	0.80	0.80	1.26
CM015575.1_RaGOO	34950000	41131340	0	1	0.0000	28	22	0.90	0.90	1.26
CM015575.1_RaGOO	35000000	41131340	2	0	0.0000	28	23	0.92	0.93	1.24
CM015575.1_RaGOO	35050000	41131340	0	0	0.0000	34	27	1.10	1.11	1.25
CM015575.1_RaGOO	35100000	41131340	1	0	0.0000	27	22	0.88	0.87	1.26
CM015575.1_RaGOO	35150000	41131340	1	0	0.0000	28	22	0.91	0.90	1.27
CM015575.1_RaGOO	35200000	41131340	0	3	0.0000	28	22	0.89	0.90	1.26
CM015575.1_RaGOO	35250000	41131340	0	1	0.0000	28	23	0.90	0.93	1.22
CM015575.1_RaGOO	35300000	41131340	0	0	0.0000	26	22	0.84	0.88	1.20
CM015575.1_RaGOO	35350000	41131340	0	0	0.0000	25	20	0.81	0.83	1.22
CM015575.1_RaGOO	35400000	41131340	7	0	0.0000	26	21	0.84	0.86	1.23
CM015575.1_RaGOO	35450000	41131340	0	0	0.0000	27	22	0.87	0.89	1.23
CM015575.1_RaGOO	35500000	41131340	6	0	0.0000	26	21	0.82	0.86	1.20
CM015575.1_RaGOO	35550000	41131340	4	0	0.0000	29	22	0.93	0.90	1.30
CM015575.1_RaGOO	35600000	41131340	0	0	0.0000	32	24	1.03	0.99	1.31
CM015575.1_RaGOO	35650000	41131340	0	0	0.0000	30	24	0.98	0.97	1.27
CM015575.1_RaGOO	35700000	41131340	4	0	0.0000	31	25	1.01	1.02	1.25
CM015575.1_RaGOO	35750000	41131340	0	1	0.0000	29	22	0.92	0.91	1.28
CM015575.1_RaGOO	35800000	41131340	0	0	0.0000	37	30	1.20	1.23	1.23
CM015575.1_RaGOO	35850000	41131340	1	0	0.0000	27	21	0.86	0.86	1.27
CM015575.1_RaGOO	35900000	41131340	2	0	0.0000	28	23	0.90	0.95	1.19
CM015575.1_RaGOO	35950000	41131340	0	0	0.0000	31	24	1.01	0.99	1.28
CM015575.1_RaGOO	36000000	41131340	0	0	0.0000	31	25	1.01	1.02	1.25
CM015575.1_RaGOO	36050000	41131340	1	1	0.0000	28	23	0.89	0.92	1.22
CM015575.1_RaGOO	36100000	41131340	1	0	0.0000	30	23	0.97	0.93	1.32
CM015575.1_RaGOO	36150000	41131340	0	1	0.0000	36	27	1.15	1.11	1.31
CM015575.1_RaGOO	36200000	41131340	0	3	0.0000	31	24	0.99	0.99	1.25
CM015575.1_RaGOO	36250000	41131340	0	1	0.0000	29	23	0.92	0.92	1.25
CM015575.1_RaGOO	36300000	41131340	0	2	0.0000	31	24	1.00	0.97	1.30
CM015575.1_RaGOO	36350000	41131340	0	0	0.0000	28	22	0.90	0.89	1.28
CM015575.1_RaGOO	36400000	41131340	0	4	0.0000	30	23	0.96	0.93	1.31
CM015575.1_RaGOO	36450000	41131340	1	0	0.0000	32	25	1.02	1.00	1.29
CM015575.1_RaGOO	36500000	41131340	0	0	0.0000	31	24	1.01	0.98	1.30
CM015575.1_RaGOO	36550000	41131340	0	1	0.0000	30	23	0.95	0.92	1.30
CM015575.1_RaGOO	36600000	41131340	1	0	0.0000	24	20	0.78	0.81	1.23
CM015575.1_RaGOO	36650000	41131340	1	6	0.0000	28	22	0.91	0.91	1.27
CM015575.1_RaGOO	36700000	41131340	5	4	0.0000	25	21	0.80	0.84	1.21
CM015575.1_RaGOO	36750000	41131340	0	1	0.0000	27	23	0.88	0.91	1.21
CM015575.1_RaGOO	36800000	41131340	1	0	0.0000	30	25	0.98	1.02	1.21
CM015575.1_RaGOO	36850000	41131340	4	0	0.0000	26	21	0.85	0.87	1.23
CM015575.1_RaGOO	36900000	41131340	4	0	0.0000	28	22	0.91	0.90	1.27
CM015575.1_RaGOO	36950000	41131340	2	0	0.0000	30	24	0.96	0.97	1.25
CM015575.1_RaGOO	37000000	41131340	14	2	0.0000	29	23	0.94	0.95	1.25
CM015575.1_RaGOO	37050000	41131340	2	1	0.0000	31	25	1.01	1.03	1.24
CM015575.1_RaGOO	37100000	41131340	0	2	0.0000	29	22	0.94	0.89	1.33
CM015575.1_RaGOO	37150000	41131340	0	1	0.0000	29	23	0.95	0.95	1.25
CM015575.1_RaGOO	37200000	41131340	0	1	0.0000	29	22	0.93	0.91	1.29
CM015575.1_RaGOO	37250000	41131340	2	0	0.0000	26	20	0.84	0.83	1.27
CM015575.1_RaGOO	37300000	41131340	0	1	0.0000	28	22	0.90	0.91	1.25
CM015575.1_RaGOO	37350000	41131340	0	1	0.0000	29	23	0.94	0.94	1.26
CM015575.1_RaGOO	37400000	41131340	0	11	0.0000	30	23	0.97	0.95	1.29
CM015575.1_RaGOO	37450000	41131340	1	18	0.0000	31	24	0.99	0.99	1.26
CM015575.1_RaGOO	37500000	41131340	0	17	0.0000	33	26	1.06	1.07	1.25
CM015575.1_RaGOO	37550000	41131340	0	0	0.0000	28	22	0.89	0.89	1.26
CM015575.1_RaGOO	37600000	41131340	0	4	0.0000	31	24	1.00	0.98	1.29
CM015575.1_RaGOO	37650000	41131340	0	0	0.0000	28	22	0.92	0.90	1.28
CM015575.1_RaGOO	37700000	41131340	2	0	0.0000	30	24	0.97	0.96	1.28
CM015575.1_RaGOO	37750000	41131340	3	1	0.0000	27	22	0.86	0.90	1.21
CM015575.1_RaGOO	37800000	41131340	1	0	0.0000	29	23	0.93	0.93	1.26
CM015575.1_RaGOO	37850000	41131340	1	1	0.0000	30	23	0.95	0.95	1.27
CM015575.1_RaGOO	37900000	41131340	3	6	0.0000	30	23	0.96	0.94	1.28
CM015575.1_RaGOO	37950000	41131340	1	1	0.0000	29	22	0.92	0.88	1.33
CM015575.1_RaGOO	38000000	41131340	8	0	0.0000	30	23	0.95	0.92	1.30
CM015575.1_RaGOO	38050000	41131340	0	0	0.0000	29	22	0.95	0.91	1.30
CM015575.1_RaGOO	38100000	41131340	0	7	0.0000	29	23	0.94	0.94	1.27
CM015575.1_RaGOO	38150000	41131340	0	2	0.0000	29	23	0.92	0.93	1.25
CM015575.1_RaGOO	38200000	41131340	0	1	0.0000	27	22	0.87	0.87	1.25
CM015575.1_RaGOO	38250000	41131340	0	0	0.0000	37	30	1.18	1.22	1.22
CM015575.1_RaGOO	38300000	41131340	0	0	0.0000	29	23	0.95	0.93	1.29
CM015575.1_RaGOO	38350000	41131340	8	3	0.0000	34	26	1.10	1.07	1.30
CM015575.1_RaGOO	38400000	41131340	1	0	0.0000	30	21	0.96	0.85	1.43
CM015575.1_RaGOO	38450000	41131340	2	1	0.0000	28	22	0.90	0.90	1.27
CM015575.1_RaGOO	38500000	41131340	9	10	0.0000	26	21	0.85	0.87	1.23
CM015575.1_RaGOO	38550000	41131340	0	0	0.0000	26	21	0.84	0.85	1.24
CM015575.1_RaGOO	38600000	41131340	3	0	0.0000	30	23	0.97	0.95	1.29
CM015575.1_RaGOO	38650000	41131340	8	0	0.0000	29	23	0.95	0.93	1.29
CM015575.1_RaGOO	38700000	41131340	2	0	0.0000	28	23	0.90	0.93	1.21
CM015575.1_RaGOO	38750000	41131340	2	0	0.0000	34	27	1.10	1.11	1.24
CM015575.1_RaGOO	38800000	41131340	4	0	0.0000	30	23	0.97	0.93	1.31
CM015575.1_RaGOO	38850000	41131340	1	3	0.0000	30	24	0.95	0.98	1.22
CM015575.1_RaGOO	38900000	41131340	0	0	0.0000	29	23	0.92	0.95	1.23
CM015575.1_RaGOO	38950000	41131340	0	0	0.0000	30	23	0.95	0.92	1.30
CM015575.1_RaGOO	39000000	41131340	0	2	0.0000	28	22	0.89	0.91	1.23
CM015575.1_RaGOO	39050000	41131340	0	0	0.0000	29	24	0.93	0.98	1.20
CM015575.1_RaGOO	39100000	41131340	0	1	0.0000	27	21	0.87	0.86	1.28
CM015575.1_RaGOO	39150000	41131340	0	9	0.0000	27	22	0.88	0.88	1.26
CM015575.1_RaGOO	39200000	41131340	5	0	0.0000	28	23	0.90	0.94	1.21
CM015575.1_RaGOO	39250000	41131340	0	0	0.0000	31	24	0.99	0.98	1.27
CM015575.1_RaGOO	39300000	41131340	4	0	0.0000	29	23	0.93	0.92	1.28
CM015575.1_RaGOO	39350000	41131340	0	1	0.0000	30	23	0.98	0.94	1.31
CM015575.1_RaGOO	39400000	41131340	0	0	0.0000	27	22	0.87	0.88	1.24
CM015575.1_RaGOO	39450000	41131340	9	0	0.0000	27	22	0.87	0.88	1.24
CM015575.1_RaGOO	39500000	41131340	1	0	0.0000	27	21	0.87	0.86	1.27
CM015575.1_RaGOO	39550000	41131340	7	1	0.0000	29	23	0.93	0.95	1.24
CM015575.1_RaGOO	39600000	41131340	1	0	0.0000	27	22	0.87	0.88	1.25
CM015575.1_RaGOO	39650000	41131340	12	0	0.0000	27	21	0.87	0.86	1.28
CM015575.1_RaGOO	39700000	41131340	0	0	0.0000	26	21	0.83	0.84	1.25
CM015575.1_RaGOO	39750000	41131340	0	0	0.0000	30	23	0.95	0.92	1.30
CM015575.1_RaGOO	39800000	41131340	0	0	0.0000	29	22	0.92	0.90	1.29
CM015575.1_RaGOO	39850000	41131340	1	0	0.0000	28	22	0.91	0.89	1.29
CM015575.1_RaGOO	39900000	41131340	2	0	0.0000	27	21	0.87	0.87	1.26
CM015575.1_RaGOO	39950000	41131340	0	0	0.0000	30	23	0.96	0.93	1.30
CM015575.1_RaGOO	40000000	41131340	0	0	0.0000	22	20	0.71	0.81	1.11
CM015575.1_RaGOO	40050000	41131340	2	0	0.0000	30	23	0.98	0.93	1.33
CM015575.1_RaGOO	40100000	41131340	0	0	0.0000	32	25	1.02	1.01	1.28
CM015575.1_RaGOO	40150000	41131340	3	0	0.0000	26	21	0.85	0.84	1.27
CM015575.1_RaGOO	40200000	41131340	1	1	0.0000	27	22	0.87	0.88	1.24
CM015575.1_RaGOO	40250000	41131340	16	0	0.0000	27	21	0.86	0.86	1.26
CM015575.1_RaGOO	40300000	41131340	0	0	0.0000	28	21	0.90	0.86	1.33
CM015575.1_RaGOO	40350000	41131340	0	0	0.0000	28	22	0.90	0.87	1.29
CM015575.1_RaGOO	40400000	41131340	0	0	0.0000	30	24	0.98	0.97	1.27
CM015575.1_RaGOO	40450000	41131340	0	0	0.0000	27	21	0.87	0.85	1.29
CM015575.1_RaGOO	40500000	41131340	7	4	0.0000	27	22	0.89	0.88	1.27
CM015575.1_RaGOO	40550000	41131340	1	0	0.0000	27	20	0.86	0.81	1.34
CM015575.1_RaGOO	40600000	41131340	0	0	0.0000	27	22	0.86	0.89	1.22
CM015575.1_RaGOO	40650000	41131340	0	0	0.0000	30	23	0.95	0.93	1.29
CM015575.1_RaGOO	40700000	41131340	0	0	0.0000	28	22	0.92	0.88	1.31
CM015575.1_RaGOO	40750000	41131340	4	0	0.0000	32	26	1.04	1.04	1.26
CM015575.1_RaGOO	40800000	41131340	2	0	0.0000	30	23	0.95	0.93	1.29
CM015575.1_RaGOO	40850000	41131340	0	1	0.0000	28	23	0.92	0.93	1.24
CM015575.1_RaGOO	40900000	41131340	0	0	0.0000	28	22	0.89	0.91	1.23
CM015575.1_RaGOO	40950000	41131340	0	1	0.0000	29	22	0.93	0.89	1.31
CM015575.1_RaGOO	41000000	41131340	4	0	0.0000	27	22	0.88	0.87	1.27
CM015575.1_RaGOO	41050000	41131340	0	1	0.0000	29	23	0.94	0.95	1.25
CM015575.1_RaGOO	41075000	41131340	0	0	0.0000	33	26	1.05	1.07	1.24
CM015575.1_RaGOO	41100000	41131340	0	0	0.0000	31	24	0.98	0.99	1.25
CM015576.1_RaGOO	0	35536662	0	1	0.0000	27	21	0.86	0.86	1.26
CM015576.1_RaGOO	50000	35536662	1	3	0.0000	30	23	0.95	0.93	1.29
CM015576.1_RaGOO	100000	35536662	2	1	0.0000	27	22	0.86	0.90	1.20
CM015576.1_RaGOO	150000	35536662	2	5	0.0000	27	22	0.87	0.87	1.26
CM015576.1_RaGOO	200000	35536662	0	2	0.0000	28	22	0.91	0.88	1.29
CM015576.1_RaGOO	250000	35536662	2	1	0.0000	28	23	0.90	0.92	1.23
CM015576.1_RaGOO	300000	35536662	2	0	0.0000	28	22	0.92	0.91	1.27
CM015576.1_RaGOO	350000	35536662	2	1	0.0000	27	21	0.87	0.87	1.26
CM015576.1_RaGOO	400000	35536662	1	0	0.0000	31	24	0.98	1.00	1.25
CM015576.1_RaGOO	450000	35536662	3	0	0.0000	28	22	0.92	0.88	1.31
CM015576.1_RaGOO	500000	35536662	22	5	0.0000	30	23	0.96	0.95	1.28
CM015576.1_RaGOO	550000	35536662	3	1	0.0000	31	25	0.99	1.00	1.24
CM015576.1_RaGOO	600000	35536662	0	0	0.0000	27	21	0.88	0.87	1.27
CM015576.1_RaGOO	650000	35536662	2	2	0.0000	29	24	0.94	0.96	1.23
CM015576.1_RaGOO	700000	35536662	2	2	0.0000	30	22	0.96	0.90	1.35
CM015576.1_RaGOO	750000	35536662	0	6	0.0000	29	22	0.94	0.91	1.30
CM015576.1_RaGOO	800000	35536662	3	1	0.0000	31	25	1.01	1.00	1.28
CM015576.1_RaGOO	850000	35536662	9	8	0.0000	29	22	0.93	0.90	1.30
CM015576.1_RaGOO	900000	35536662	0	7	0.0000	30	24	0.96	0.98	1.24
CM015576.1_RaGOO	950000	35536662	0	0	0.0000	31	23	1.00	0.95	1.32
CM015576.1_RaGOO	1000000	35536662	0	0	0.0000	92	130	2.95	5.27	0.71
CM015576.1_RaGOO	1050000	35536662	0	2	0.0000	33	25	1.05	1.02	1.30
CM015576.1_RaGOO	1100000	35536662	3	3	0.0000	30	24	0.96	0.98	1.24
CM015576.1_RaGOO	1150000	35536662	2	2	0.0000	27	21	0.86	0.84	1.30
CM015576.1_RaGOO	1200000	35536662	3	0	0.0000	30	24	0.95	0.96	1.25
CM015576.1_RaGOO	1250000	35536662	0	0	0.0000	32	25	1.03	1.02	1.27
CM015576.1_RaGOO	1300000	35536662	0	2	0.0000	29	24	0.94	0.99	1.20
CM015576.1_RaGOO	1350000	35536662	0	0	0.0000	31	25	1.01	1.02	1.26
CM015576.1_RaGOO	1400000	35536662	1	7	0.0000	30	24	0.96	0.97	1.26
CM015576.1_RaGOO	1450000	35536662	1	1	0.0000	31	25	0.99	1.00	1.25
CM015576.1_RaGOO	1500000	35536662	2	1	0.0000	34	28	1.11	1.12	1.25
CM015576.1_RaGOO	1550000	35536662	2	3	0.0000	29	24	0.92	0.96	1.22
CM015576.1_RaGOO	1600000	35536662	4	0	0.0000	28	22	0.90	0.90	1.27
CM015576.1_RaGOO	1650000	35536662	3	0	0.0000	30	24	0.97	0.97	1.26
CM015576.1_RaGOO	1700000	35536662	1	5	0.0000	29	22	0.92	0.90	1.29
CM015576.1_RaGOO	1750000	35536662	3	0	0.0000	30	23	0.96	0.95	1.27
CM015576.1_RaGOO	1800000	35536662	1	2	0.0000	33	26	1.05	1.07	1.24
CM015576.1_RaGOO	1850000	35536662	2	0	0.0000	31	25	0.99	1.00	1.24
CM015576.1_RaGOO	1900000	35536662	11	7	0.0011	23	19	0.74	0.76	1.23
CM015576.1_RaGOO	1950000	35536662	2	0	0.0000	26	21	0.83	0.86	1.22
CM015576.1_RaGOO	2000000	35536662	1	5	0.0000	31	23	0.99	0.95	1.31
CM015576.1_RaGOO	2050000	35536662	1	1	0.0000	31	25	1.02	1.01	1.26
CM015576.1_RaGOO	2100000	35536662	4	3	0.0000	31	24	0.98	0.96	1.29
CM015576.1_RaGOO	2150000	35536662	1	6	0.0000	30	24	0.97	0.98	1.25
CM015576.1_RaGOO	2200000	35536662	3	2	0.0000	28	23	0.90	0.92	1.24
CM015576.1_RaGOO	2250000	35536662	1	1	0.0000	30	23	0.96	0.94	1.29
CM015576.1_RaGOO	2300000	35536662	2	9	0.0000	25	20	0.81	0.83	1.23
CM015576.1_RaGOO	2350000	35536662	8	2	0.0000	20	15	0.65	0.63	1.31
CM015576.1_RaGOO	2400000	35536662	1	0	0.0000	35	27	1.12	1.10	1.29
CM015576.1_RaGOO	2450000	35536662	1	3	0.0000	32	25	1.05	1.01	1.31
CM015576.1_RaGOO	2500000	35536662	0	2	0.0000	31	25	1.01	1.01	1.26
CM015576.1_RaGOO	2550000	35536662	0	0	0.0000	32	24	1.02	0.99	1.30
CM015576.1_RaGOO	2600000	35536662	0	1	0.0000	29	24	0.94	0.97	1.22
CM015576.1_RaGOO	2650000	35536662	3	4	0.0000	28	22	0.91	0.91	1.27
CM015576.1_RaGOO	2700000	35536662	2	1	0.0000	28	22	0.91	0.89	1.29
CM015576.1_RaGOO	2750000	35536662	5	2	0.0000	27	22	0.87	0.88	1.24
CM015576.1_RaGOO	2800000	35536662	13	0	0.0000	27	20	0.86	0.82	1.32
CM015576.1_RaGOO	2850000	35536662	12	5	0.0000	29	22	0.93	0.91	1.29
CM015576.1_RaGOO	2900000	35536662	8	0	0.0000	69	54	2.23	2.21	1.27
CM015576.1_RaGOO	2950000	35536662	5	2	0.0000	21	17	0.69	0.70	1.24
CM015576.1_RaGOO	3000000	35536662	0	0	0.0000	50	38	1.62	1.55	1.31
CM015576.1_RaGOO	3050000	35536662	0	1	0.0000	36	29	1.17	1.17	1.26
CM015576.1_RaGOO	3100000	35536662	1	0	0.0000	31	25	1.01	1.02	1.25
CM015576.1_RaGOO	3150000	35536662	2	6	0.0000	28	22	0.90	0.91	1.25
CM015576.1_RaGOO	3200000	35536662	1	1	0.0000	31	24	1.00	0.97	1.30
CM015576.1_RaGOO	3250000	35536662	3	2	0.0000	29	23	0.93	0.93	1.26
CM015576.1_RaGOO	3300000	35536662	1	0	0.0000	29	23	0.93	0.92	1.28
CM015576.1_RaGOO	3350000	35536662	1	1	0.0000	27	22	0.88	0.90	1.24
CM015576.1_RaGOO	3400000	35536662	1	4	0.0000	30	23	0.96	0.95	1.27
CM015576.1_RaGOO	3450000	35536662	6	3	0.0000	28	22	0.89	0.90	1.25
CM015576.1_RaGOO	3500000	35536662	4	3	0.0000	30	24	0.98	0.97	1.27
CM015576.1_RaGOO	3550000	35536662	2	1	0.0000	31	25	0.99	1.02	1.22
CM015576.1_RaGOO	3600000	35536662	4	3	0.0000	32	25	1.03	1.03	1.26
CM015576.1_RaGOO	3650000	35536662	2	5	0.0000	32	24	1.02	0.99	1.29
CM015576.1_RaGOO	3700000	35536662	0	1	0.0000	32	25	1.04	1.02	1.28
CM015576.1_RaGOO	3750000	35536662	3	1	0.0000	31	24	0.99	0.96	1.29
CM015576.1_RaGOO	3800000	35536662	14	0	0.0000	32	25	1.04	1.03	1.26
CM015576.1_RaGOO	3850000	35536662	2	0	0.0000	31	24	0.99	0.99	1.27
CM015576.1_RaGOO	3900000	35536662	6	0	0.0000	30	24	0.97	0.98	1.24
CM015576.1_RaGOO	3950000	35536662	4	0	0.0000	30	24	0.97	0.97	1.26
CM015576.1_RaGOO	4000000	35536662	2	1	0.0000	32	25	1.03	1.00	1.29
CM015576.1_RaGOO	4050000	35536662	1	3	0.0000	32	25	1.02	1.01	1.27
CM015576.1_RaGOO	4100000	35536662	4	1	0.0000	30	23	0.96	0.94	1.28
CM015576.1_RaGOO	4150000	35536662	5	0	0.0000	36	29	1.17	1.18	1.25
CM015576.1_RaGOO	4200000	35536662	1	0	0.0000	32	25	1.05	1.03	1.28
CM015576.1_RaGOO	4250000	35536662	0	5	0.0000	32	26	1.05	1.05	1.25
CM015576.1_RaGOO	4300000	35536662	0	1	0.0000	29	23	0.92	0.96	1.22
CM015576.1_RaGOO	4350000	35536662	1	0	0.0000	33	26	1.06	1.06	1.25
CM015576.1_RaGOO	4400000	35536662	0	0	0.0000	33	25	1.05	1.04	1.28
CM015576.1_RaGOO	4450000	35536662	0	0	0.0000	31	24	1.02	0.99	1.29
CM015576.1_RaGOO	4500000	35536662	5	1	0.0000	31	25	1.01	1.00	1.27
CM015576.1_RaGOO	4550000	35536662	0	0	0.0000	31	25	1.01	1.01	1.26
CM015576.1_RaGOO	4600000	35536662	13	2	0.0000	31	25	1.01	1.02	1.24
CM015576.1_RaGOO	4650000	35536662	3	1	0.0000	33	25	1.06	1.04	1.28
CM015576.1_RaGOO	4700000	35536662	2	0	0.0000	30	23	0.97	0.96	1.28
CM015576.1_RaGOO	4750000	35536662	1	0	0.0000	32	24	1.02	0.99	1.30
CM015576.1_RaGOO	4800000	35536662	0	0	0.0000	30	25	0.97	1.01	1.22
CM015576.1_RaGOO	4850000	35536662	4	1	0.0000	30	25	0.98	1.01	1.22
CM015576.1_RaGOO	4900000	35536662	1	0	0.0000	32	25	1.02	1.00	1.28
CM015576.1_RaGOO	4950000	35536662	1	0	0.0000	31	25	0.98	1.02	1.22
CM015576.1_RaGOO	5000000	35536662	0	0	0.0000	34	27	1.10	1.09	1.27
CM015576.1_RaGOO	5050000	35536662	1	0	0.0000	32	25	1.04	1.01	1.31
CM015576.1_RaGOO	5100000	35536662	0	0	0.0000	33	26	1.05	1.05	1.27
CM015576.1_RaGOO	5150000	35536662	2	1	0.0000	35	27	1.12	1.08	1.30
CM015576.1_RaGOO	5200000	35536662	0	0	0.0000	31	24	0.99	0.96	1.30
CM015576.1_RaGOO	5250000	35536662	0	3	0.0000	32	25	1.02	1.02	1.26
CM015576.1_RaGOO	5300000	35536662	6	1	0.0000	31	25	0.99	1.00	1.25
CM015576.1_RaGOO	5350000	35536662	1	1	0.0000	42	33	1.36	1.35	1.26
CM015576.1_RaGOO	5400000	35536662	0	0	0.0000	37	29	1.19	1.19	1.25
CM015576.1_RaGOO	5450000	35536662	1	3	0.0000	29	23	0.93	0.94	1.25
CM015576.1_RaGOO	5500000	35536662	1	0	0.0000	27	20	0.87	0.83	1.33
CM015576.1_RaGOO	5550000	35536662	3	6	0.0000	26	22	0.84	0.89	1.19
CM015576.1_RaGOO	5600000	35536662	3	0	0.0000	35	27	1.14	1.08	1.32
CM015576.1_RaGOO	5650000	35536662	3	2	0.0000	25	20	0.82	0.80	1.30
CM015576.1_RaGOO	5700000	35536662	0	0	0.0000	31	26	1.00	1.04	1.22
CM015576.1_RaGOO	5750000	35536662	9	1	0.0000	32	26	1.04	1.07	1.23
CM015576.1_RaGOO	5800000	35536662	3	0	0.0000	32	24	1.03	0.99	1.31
CM015576.1_RaGOO	5850000	35536662	0	0	0.0000	31	25	1.01	1.03	1.24
CM015576.1_RaGOO	5900000	35536662	0	0	0.0000	32	25	1.04	1.00	1.31
CM015576.1_RaGOO	5950000	35536662	7	0	0.0000	32	25	1.04	1.03	1.27
CM015576.1_RaGOO	6000000	35536662	1	0	0.0000	32	25	1.04	1.03	1.28
CM015576.1_RaGOO	6050000	35536662	4	0	0.0000	33	25	1.07	1.04	1.30
CM015576.1_RaGOO	6100000	35536662	4	6	0.0000	27	22	0.87	0.89	1.24
CM015576.1_RaGOO	6150000	35536662	0	1	0.0000	30	24	0.97	0.96	1.27
CM015576.1_RaGOO	6200000	35536662	0	1	0.0000	30	24	0.97	0.99	1.23
CM015576.1_RaGOO	6250000	35536662	1	1	0.0000	31	24	0.99	0.97	1.28
CM015576.1_RaGOO	6300000	35536662	4	1	0.0000	33	26	1.05	1.04	1.27
CM015576.1_RaGOO	6350000	35536662	12	0	0.0000	29	24	0.95	0.97	1.23
CM015576.1_RaGOO	6400000	35536662	1	0	0.0000	40	31	1.30	1.24	1.31
CM015576.1_RaGOO	6450000	35536662	0	1	0.0000	33	25	1.07	1.01	1.34
CM015576.1_RaGOO	6500000	35536662	1	7	0.0000	29	23	0.93	0.92	1.28
CM015576.1_RaGOO	6550000	35536662	2	1	0.0000	51	42	1.66	1.69	1.24
CM015576.1_RaGOO	6600000	35536662	14	2	0.0000	30	25	0.98	1.01	1.23
CM015576.1_RaGOO	6650000	35536662	1	2	0.0000	33	25	1.06	1.01	1.32
CM015576.1_RaGOO	6700000	35536662	0	4	0.0000	31	24	0.99	0.99	1.26
CM015576.1_RaGOO	6750000	35536662	2	6	0.0000	32	25	1.02	1.04	1.24
CM015576.1_RaGOO	6800000	35536662	0	0	0.0000	34	27	1.11	1.10	1.27
CM015576.1_RaGOO	6850000	35536662	0	2	0.0000	31	25	1.01	1.01	1.26
CM015576.1_RaGOO	6900000	35536662	1	4	0.0000	34	27	1.11	1.11	1.25
CM015576.1_RaGOO	6950000	35536662	0	0	0.0000	31	25	1.01	1.02	1.26
CM015576.1_RaGOO	7000000	35536662	5	0	0.0000	32	26	1.04	1.05	1.25
CM015576.1_RaGOO	7050000	35536662	0	3	0.0000	32	26	1.04	1.05	1.25
CM015576.1_RaGOO	7100000	35536662	3	0	0.0000	33	26	1.06	1.04	1.28
CM015576.1_RaGOO	7150000	35536662	3	0	0.0000	32	26	1.03	1.05	1.24
CM015576.1_RaGOO	7200000	35536662	0	0	0.0000	37	27	1.19	1.11	1.36
CM015576.1_RaGOO	7250000	35536662	4	0	0.0000	46	37	1.50	1.49	1.27
CM015576.1_RaGOO	7300000	35536662	0	0	0.0000	35	29	1.13	1.16	1.23
CM015576.1_RaGOO	7350000	35536662	6	0	0.0000	31	24	1.00	0.98	1.30
CM015576.1_RaGOO	7400000	35536662	5	0	0.0000	32	27	1.05	1.08	1.22
CM015576.1_RaGOO	7450000	35536662	4	0	0.0000	31	24	0.99	0.97	1.28
CM015576.1_RaGOO	7500000	35536662	0	4	0.0000	35	27	1.14	1.09	1.32
CM015576.1_RaGOO	7550000	35536662	3	0	0.0000	30	24	0.97	0.98	1.25
CM015576.1_RaGOO	7600000	35536662	1	0	0.0000	31	25	1.01	1.01	1.26
CM015576.1_RaGOO	7650000	35536662	0	1	0.0000	32	26	1.04	1.07	1.23
CM015576.1_RaGOO	7700000	35536662	1	2	0.0000	30	24	0.98	0.98	1.27
CM015576.1_RaGOO	7750000	35536662	7	1	0.0000	28	23	0.91	0.92	1.24
CM015576.1_RaGOO	7800000	35536662	1	0	0.0000	28	21	0.89	0.87	1.29
CM015576.1_RaGOO	7850000	35536662	4	8	0.0000	31	25	0.99	1.02	1.23
CM015576.1_RaGOO	7900000	35536662	6	2	0.0000	29	23	0.93	0.94	1.25
CM015576.1_RaGOO	7950000	35536662	1	1	0.0000	31	24	0.99	0.96	1.30
CM015576.1_RaGOO	8000000	35536662	0	2	0.0000	31	25	1.01	1.01	1.26
CM015576.1_RaGOO	8050000	35536662	0	1	0.0000	32	26	1.02	1.05	1.23
CM015576.1_RaGOO	8100000	35536662	3	13	0.0000	31	25	1.02	1.02	1.26
CM015576.1_RaGOO	8150000	35536662	0	2	0.0000	32	24	1.03	0.96	1.34
CM015576.1_RaGOO	8200000	35536662	0	0	0.0000	32	24	1.03	0.99	1.31
CM015576.1_RaGOO	8250000	35536662	9	1	0.0000	30	23	0.96	0.95	1.27
CM015576.1_RaGOO	8300000	35536662	3	13	0.0000	34	27	1.09	1.09	1.26
CM015576.1_RaGOO	8350000	35536662	1	0	0.0000	32	25	1.02	1.02	1.26
CM015576.1_RaGOO	8400000	35536662	1	4	0.0000	31	25	1.02	1.01	1.27
CM015576.1_RaGOO	8450000	35536662	2	0	0.0000	33	26	1.06	1.05	1.27
CM015576.1_RaGOO	8500000	35536662	0	0	0.0000	33	26	1.05	1.05	1.27
CM015576.1_RaGOO	8550000	35536662	0	0	0.0000	32	25	1.02	1.02	1.25
CM015576.1_RaGOO	8600000	35536662	1	0	0.0000	34	26	1.09	1.06	1.30
CM015576.1_RaGOO	8650000	35536662	0	0	0.0000	33	25	1.06	1.01	1.32
CM015576.1_RaGOO	8700000	35536662	1	3	0.0000	33	26	1.06	1.06	1.26
CM015576.1_RaGOO	8750000	35536662	2	6	0.0000	32	24	1.04	0.99	1.32
CM015576.1_RaGOO	8800000	35536662	5	7	0.0000	32	24	1.02	0.99	1.30
CM015576.1_RaGOO	8850000	35536662	0	0	0.0000	33	26	1.06	1.04	1.28
CM015576.1_RaGOO	8900000	35536662	1	1	0.0000	31	25	1.01	1.01	1.25
CM015576.1_RaGOO	8950000	35536662	11	0	0.0000	32	26	1.02	1.05	1.23
CM015576.1_RaGOO	9000000	35536662	0	1	0.0000	31	24	0.99	0.97	1.29
CM015576.1_RaGOO	9050000	35536662	2	1	0.0000	32	26	1.04	1.04	1.26
CM015576.1_RaGOO	9100000	35536662	0	3	0.0000	30	24	0.97	0.99	1.24
CM015576.1_RaGOO	9150000	35536662	3	0	0.0000	30	25	0.98	1.02	1.21
CM015576.1_RaGOO	9200000	35536662	0	1	0.0000	30	24	0.96	0.96	1.25
CM015576.1_RaGOO	9250000	35536662	0	15	0.0000	31	24	0.99	0.99	1.25
CM015576.1_RaGOO	9300000	35536662	0	0	0.0000	30	23	0.95	0.92	1.31
CM015576.1_RaGOO	9350000	35536662	2	2	0.0000	29	23	0.92	0.93	1.24
CM015576.1_RaGOO	9400000	35536662	0	6	0.0000	27	21	0.88	0.86	1.29
CM015576.1_RaGOO	9450000	35536662	1	2	0.0000	29	23	0.92	0.95	1.22
CM015576.1_RaGOO	9500000	35536662	0	7	0.0000	31	24	0.99	0.99	1.25
CM015576.1_RaGOO	9550000	35536662	0	1	0.0000	27	22	0.88	0.89	1.25
CM015576.1_RaGOO	9600000	35536662	0	6	0.0000	30	24	0.96	0.96	1.25
CM015576.1_RaGOO	9650000	35536662	0	1	0.0000	29	24	0.94	0.96	1.24
CM015576.1_RaGOO	9700000	35536662	1	0	0.0000	29	23	0.93	0.95	1.23
CM015576.1_RaGOO	9750000	35536662	0	0	0.0000	30	23	0.98	0.95	1.29
CM015576.1_RaGOO	9800000	35536662	0	0	0.0000	39	29	1.24	1.17	1.34
CM015576.1_RaGOO	9850000	35536662	0	0	0.0000	35	29	1.14	1.19	1.21
CM015576.1_RaGOO	9900000	35536662	0	0	0.0000	29	23	0.93	0.95	1.24
CM015576.1_RaGOO	9950000	35536662	1	0	0.0000	28	23	0.90	0.92	1.24
CM015576.1_RaGOO	10000000	35536662	1	7	0.0000	29	24	0.92	0.96	1.22
CM015576.1_RaGOO	10050000	35536662	1	0	0.0000	31	24	0.99	0.99	1.27
CM015576.1_RaGOO	10100000	35536662	2	1	0.0000	32	25	1.03	1.02	1.28
CM015576.1_RaGOO	10150000	35536662	1	1	0.0000	32	26	1.03	1.06	1.23
CM015576.1_RaGOO	10200000	35536662	2	19	0.0000	23	18	0.73	0.74	1.24
CM015576.1_RaGOO	10250000	35536662	4	9	0.0000	12	10	0.40	0.40	1.25
CM015576.1_RaGOO	10300000	35536662	0	6	0.0000	17	13	0.54	0.53	1.29
CM015576.1_RaGOO	10350000	35536662	3	2	0.0000	30	26	0.98	1.06	1.16
CM015576.1_RaGOO	10400000	35536662	13	16	0.0000	32	26	1.05	1.05	1.25
CM015576.1_RaGOO	10450000	35536662	15	7	0.0000	29	23	0.94	0.93	1.28
CM015576.1_RaGOO	10500000	35536662	0	0	0.0000	30	24	0.96	0.98	1.23
CM015576.1_RaGOO	10550000	35536662	0	3	0.0000	30	25	0.96	1.00	1.21
CM015576.1_RaGOO	10600000	35536662	0	7	0.0000	29	24	0.95	0.96	1.24
CM015576.1_RaGOO	10650000	35536662	1	0	0.0000	30	24	0.95	0.97	1.24
CM015576.1_RaGOO	10700000	35536662	4	0	0.0000	32	26	1.03	1.06	1.22
CM015576.1_RaGOO	10750000	35536662	0	4	0.0000	32	25	1.02	1.00	1.29
CM015576.1_RaGOO	10800000	35536662	4	0	0.0000	28	23	0.90	0.92	1.22
CM015576.1_RaGOO	10850000	35536662	2	12	0.0000	28	23	0.90	0.93	1.22
CM015576.1_RaGOO	10900000	35536662	0	0	0.0000	31	25	0.99	1.01	1.24
CM015576.1_RaGOO	10950000	35536662	0	2	0.0000	31	25	1.00	1.00	1.26
CM015576.1_RaGOO	11000000	35536662	7	0	0.0000	31	25	0.99	1.00	1.25
CM015576.1_RaGOO	11050000	35536662	1	2	0.0000	28	23	0.92	0.93	1.24
CM015576.1_RaGOO	11100000	35536662	0	1	0.0000	30	25	0.98	1.00	1.23
CM015576.1_RaGOO	11150000	35536662	2	0	0.0000	30	23	0.95	0.95	1.27
CM015576.1_RaGOO	11200000	35536662	0	0	0.0000	31	25	1.02	1.02	1.25
CM015576.1_RaGOO	11250000	35536662	1	4	0.0000	29	23	0.95	0.94	1.27
CM015576.1_RaGOO	11300000	35536662	0	13	0.0000	29	24	0.94	0.96	1.23
CM015576.1_RaGOO	11350000	35536662	6	1	0.0000	31	24	0.99	0.97	1.29
CM015576.1_RaGOO	11400000	35536662	1	1	0.0000	29	22	0.94	0.91	1.30
CM015576.1_RaGOO	11450000	35536662	1	1	0.0000	27	21	0.87	0.87	1.27
CM015576.1_RaGOO	11500000	35536662	0	1	0.0000	28	23	0.90	0.93	1.22
CM015576.1_RaGOO	11550000	35536662	1	2	0.0000	29	22	0.92	0.91	1.27
CM015576.1_RaGOO	11600000	35536662	0	6	0.0000	32	25	1.03	1.01	1.28
CM015576.1_RaGOO	11650000	35536662	0	1	0.0000	26	22	0.82	0.88	1.18
CM015576.1_RaGOO	11700000	35536662	4	3	0.0000	29	23	0.94	0.92	1.28
CM015576.1_RaGOO	11750000	35536662	0	1	0.0000	28	23	0.91	0.93	1.23
CM015576.1_RaGOO	11800000	35536662	2	0	0.0000	31	24	0.99	0.98	1.27
CM015576.1_RaGOO	11850000	35536662	0	4	0.0000	29	24	0.92	0.97	1.20
CM015576.1_RaGOO	11900000	35536662	0	0	0.0000	28	22	0.91	0.90	1.27
CM015576.1_RaGOO	11950000	35536662	0	0	0.0000	32	25	1.03	1.02	1.27
CM015576.1_RaGOO	12000000	35536662	2	0	0.0000	29	23	0.93	0.93	1.26
CM015576.1_RaGOO	12050000	35536662	0	0	0.0000	32	25	1.04	1.01	1.29
CM015576.1_RaGOO	12100000	35536662	0	8	0.0000	32	25	1.04	1.01	1.31
CM015576.1_RaGOO	12150000	35536662	14	0	0.0000	29	24	0.92	0.96	1.21
CM015576.1_RaGOO	12200000	35536662	3	0	0.0000	31	24	0.99	0.99	1.26
CM015576.1_RaGOO	12250000	35536662	1	0	0.0000	30	25	0.98	1.00	1.24
CM015576.1_RaGOO	12300000	35536662	0	0	0.0000	32	25	1.03	1.03	1.27
CM015576.1_RaGOO	12350000	35536662	0	3	0.0000	30	24	0.98	0.96	1.29
CM015576.1_RaGOO	12400000	35536662	1	0	0.0000	30	23	0.96	0.95	1.27
CM015576.1_RaGOO	12450000	35536662	0	0	0.0000	31	23	1.00	0.95	1.33
CM015576.1_RaGOO	12500000	35536662	0	1	0.0000	29	23	0.93	0.94	1.24
CM015576.1_RaGOO	12550000	35536662	6	2	0.0000	30	23	0.96	0.93	1.29
CM015576.1_RaGOO	12600000	35536662	2	20	0.0000	28	22	0.89	0.89	1.26
CM015576.1_RaGOO	12650000	35536662	4	2	0.0000	28	23	0.92	0.95	1.22
CM015576.1_RaGOO	12700000	35536662	1	2	0.0000	31	25	1.01	1.00	1.27
CM015576.1_RaGOO	12750000	35536662	0	3	0.0000	31	24	1.00	0.98	1.28
CM015576.1_RaGOO	12800000	35536662	0	1	0.0000	30	25	0.98	1.01	1.22
CM015576.1_RaGOO	12850000	35536662	1	4	0.0000	30	23	0.96	0.95	1.28
CM015576.1_RaGOO	12900000	35536662	1	7	0.0000	29	22	0.93	0.91	1.28
CM015576.1_RaGOO	12950000	35536662	0	6	0.0000	31	25	1.00	1.02	1.24
CM015576.1_RaGOO	13000000	35536662	0	4	0.0000	31	25	1.01	1.00	1.28
CM015576.1_RaGOO	13050000	35536662	3	2	0.0000	29	23	0.93	0.92	1.28
CM015576.1_RaGOO	13100000	35536662	0	0	0.0000	29	24	0.94	0.96	1.23
CM015576.1_RaGOO	13150000	35536662	0	3	0.0000	30	24	0.98	0.97	1.28
CM015576.1_RaGOO	13200000	35536662	0	0	0.0000	28	23	0.91	0.92	1.26
CM015576.1_RaGOO	13250000	35536662	3	1	0.0000	30	24	0.96	0.98	1.24
CM015576.1_RaGOO	13300000	35536662	1	1	0.0000	33	25	1.06	1.01	1.31
CM015576.1_RaGOO	13350000	35536662	2	2	0.0000	33	26	1.08	1.05	1.29
CM015576.1_RaGOO	13400000	35536662	1	1	0.0000	29	22	0.92	0.90	1.29
CM015576.1_RaGOO	13450000	35536662	1	0	0.0000	29	23	0.93	0.92	1.27
CM015576.1_RaGOO	13500000	35536662	1	1	0.0000	32	25	1.02	1.00	1.28
CM015576.1_RaGOO	13550000	35536662	1	1	0.0000	33	26	1.05	1.04	1.27
CM015576.1_RaGOO	13600000	35536662	0	0	0.0000	28	22	0.91	0.88	1.30
CM015576.1_RaGOO	13650000	35536662	0	1	0.0000	32	25	1.03	1.03	1.26
CM015576.1_RaGOO	13700000	35536662	3	1	0.0000	38	30	1.21	1.22	1.25
CM015576.1_RaGOO	13750000	35536662	1	0	0.0000	39	31	1.26	1.27	1.25
CM015576.1_RaGOO	13800000	35536662	0	1	0.0000	32	25	1.02	1.00	1.29
CM015576.1_RaGOO	13850000	35536662	0	0	0.0000	29	23	0.94	0.95	1.24
CM015576.1_RaGOO	13900000	35536662	2	1	0.0000	29	23	0.93	0.95	1.23
CM015576.1_RaGOO	13950000	35536662	6	3	0.0000	28	23	0.90	0.92	1.23
CM015576.1_RaGOO	14000000	35536662	0	0	0.0000	32	26	1.03	1.05	1.24
CM015576.1_RaGOO	14050000	35536662	0	2	0.0000	31	25	1.01	1.00	1.28
CM015576.1_RaGOO	14100000	35536662	4	3	0.0000	30	24	0.97	0.96	1.27
CM015576.1_RaGOO	14150000	35536662	1	1	0.0000	30	23	0.96	0.93	1.31
CM015576.1_RaGOO	14200000	35536662	0	0	0.0000	28	22	0.90	0.91	1.25
CM015576.1_RaGOO	14250000	35536662	1	0	0.0000	29	24	0.95	0.97	1.23
CM015576.1_RaGOO	14300000	35536662	5	9	0.0000	26	21	0.84	0.85	1.24
CM015576.1_RaGOO	14350000	35536662	1	5	0.0000	28	22	0.89	0.91	1.24
CM015576.1_RaGOO	14400000	35536662	1	1	0.0000	31	25	1.02	1.02	1.26
CM015576.1_RaGOO	14450000	35536662	0	1	0.0000	29	23	0.93	0.92	1.27
CM015576.1_RaGOO	14500000	35536662	4	0	0.0000	31	25	0.99	1.01	1.23
CM015576.1_RaGOO	14550000	35536662	7	1	0.0000	30	23	0.96	0.95	1.27
CM015576.1_RaGOO	14600000	35536662	0	0	0.0000	33	26	1.06	1.07	1.25
CM015576.1_RaGOO	14650000	35536662	0	0	0.0000	31	25	1.00	1.00	1.26
CM015576.1_RaGOO	14700000	35536662	2	0	0.0000	27	22	0.87	0.90	1.22
CM015576.1_RaGOO	14750000	35536662	1	3	0.0000	28	22	0.90	0.90	1.27
CM015576.1_RaGOO	14800000	35536662	1	2	0.0000	31	24	0.99	0.97	1.30
CM015576.1_RaGOO	14850000	35536662	3	0	0.0000	27	21	0.86	0.87	1.25
CM015576.1_RaGOO	14900000	35536662	0	0	0.0000	28	23	0.90	0.92	1.24
CM015576.1_RaGOO	14950000	35536662	1	0	0.0000	28	22	0.91	0.89	1.28
CM015576.1_RaGOO	15000000	35536662	0	0	0.0000	27	21	0.86	0.85	1.27
CM015576.1_RaGOO	15050000	35536662	0	0	0.0000	30	23	0.95	0.94	1.28
CM015576.1_RaGOO	15100000	35536662	1	0	0.0000	30	23	0.95	0.95	1.26
CM015576.1_RaGOO	15150000	35536662	0	1	0.0000	30	23	0.96	0.94	1.29
CM015576.1_RaGOO	15200000	35536662	2	0	0.0000	26	21	0.85	0.87	1.23
CM015576.1_RaGOO	15250000	35536662	3	1	0.0000	29	22	0.93	0.91	1.28
CM015576.1_RaGOO	15300000	35536662	1	1	0.0000	30	24	0.97	0.96	1.28
CM015576.1_RaGOO	15350000	35536662	16	0	0.0000	28	22	0.91	0.90	1.27
CM015576.1_RaGOO	15400000	35536662	1	2	0.0000	27	21	0.88	0.86	1.29
CM015576.1_RaGOO	15450000	35536662	5	4	0.0000	28	22	0.89	0.88	1.27
CM015576.1_RaGOO	15500000	35536662	2	1	0.0000	28	23	0.92	0.93	1.23
CM015576.1_RaGOO	15550000	35536662	4	0	0.0000	29	22	0.95	0.90	1.32
CM015576.1_RaGOO	15600000	35536662	5	4	0.0000	28	22	0.91	0.90	1.28
[truncated: 17,181 more rows]
