# Supplementary material for: The rise and fall of the ancient northern pike master sex-determining gene
Source: eLife. 2021 Jan 28;10:e62858. doi: 10.7554/eLife.62858 (PMC7870143; doi:10.7554/eLife.62858)
Supplement: Source data 6. [file elife-62858-data6.csv]

Contig	Position	Length	Snps_females	Snps_males	Fst	Abs_depth_females	Abs_depth_males	Rel_depth_females	Rel_depth_males	Depth_ratio
CM015574.1_RaGOO	0	43054107	0	0	0.0000	146	29	4.71	1.19	4.97
CM015574.1_RaGOO	1000	43054107	0	0	0.0000	22	22	0.71	0.89	1.01
CM015574.1_RaGOO	2000	43054107	0	0	0.0000	30	22	0.97	0.91	1.34
CM015574.1_RaGOO	3000	43054107	0	0	0.0000	33	31	1.05	1.26	1.06
CM015574.1_RaGOO	4000	43054107	0	0	0.0000	34	26	1.10	1.05	1.31
CM015574.1_RaGOO	5000	43054107	0	0	0.0000	30	22	0.97	0.91	1.35
CM015574.1_RaGOO	6000	43054107	0	0	0.0000	29	20	0.93	0.82	1.42
CM015574.1_RaGOO	7000	43054107	0	1	0.0000	35	30	1.13	1.23	1.17
CM015574.1_RaGOO	8000	43054107	0	0	0.0000	28	18	0.91	0.74	1.55
CM015574.1_RaGOO	9000	43054107	0	0	0.0015	32	26	1.02	1.06	1.21
CM015574.1_RaGOO	10000	43054107	0	0	0.0008	36	27	1.16	1.09	1.35
CM015574.1_RaGOO	11000	43054107	0	0	0.0000	27	24	0.87	0.96	1.13
CM015574.1_RaGOO	12000	43054107	0	0	0.0000	31	23	1.01	0.94	1.35
CM015574.1_RaGOO	13000	43054107	0	0	0.0009	29	20	0.94	0.83	1.43
CM015574.1_RaGOO	14000	43054107	0	0	0.0000	31	25	0.98	1.00	1.24
CM015574.1_RaGOO	15000	43054107	0	0	0.0830	24	26	0.78	1.07	0.92
CM015574.1_RaGOO	16000	43054107	0	0	0.0653	29	23	0.94	0.93	1.28
CM015574.1_RaGOO	17000	43054107	0	0	0.0000	26	21	0.83	0.85	1.23
CM015574.1_RaGOO	18000	43054107	0	0	0.0000	26	23	0.83	0.92	1.14
CM015574.1_RaGOO	19000	43054107	0	0	0.0000	19	24	0.60	0.97	0.78
CM015574.1_RaGOO	20000	43054107	0	0	0.0000	27	19	0.87	0.79	1.39
CM015574.1_RaGOO	21000	43054107	0	0	0.0000	27	22	0.88	0.90	1.24
CM015574.1_RaGOO	22000	43054107	0	0	0.0000	22	23	0.71	0.94	0.95
CM015574.1_RaGOO	23000	43054107	0	0	0.0784	26	24	0.85	0.99	1.08
CM015574.1_RaGOO	24000	43054107	0	0	0.0000	27	23	0.87	0.94	1.16
CM015574.1_RaGOO	25000	43054107	0	0	0.0240	30	20	0.96	0.82	1.47
CM015574.1_RaGOO	26000	43054107	0	0	0.0623	30	24	0.97	0.98	1.25
CM015574.1_RaGOO	27000	43054107	0	0	0.0000	34	24	1.09	0.97	1.41
CM015574.1_RaGOO	28000	43054107	0	0	0.0725	32	24	1.05	0.98	1.34
CM015574.1_RaGOO	29000	43054107	0	0	0.0000	27	22	0.86	0.89	1.22
CM015574.1_RaGOO	30000	43054107	0	0	0.0000	17	15	0.55	0.61	1.13
CM015574.1_RaGOO	31000	43054107	0	0	0.0000	25	24	0.82	0.97	1.06
CM015574.1_RaGOO	32000	43054107	0	0	0.0000	26	19	0.83	0.78	1.33
CM015574.1_RaGOO	33000	43054107	0	0	0.0391	25	18	0.81	0.75	1.37
CM015574.1_RaGOO	34000	43054107	0	0	0.0000	33	18	1.07	0.72	1.87
CM015574.1_RaGOO	35000	43054107	0	0	0.0000	30	26	0.97	1.07	1.14
CM015574.1_RaGOO	36000	43054107	0	0	0.0209	30	25	0.96	1.02	1.19
CM015574.1_RaGOO	37000	43054107	0	0	0.0000	34	25	1.10	1.03	1.35
CM015574.1_RaGOO	38000	43054107	0	0	0.0193	28	21	0.90	0.85	1.34
CM015574.1_RaGOO	39000	43054107	0	0	0.0000	27	20	0.88	0.81	1.37
CM015574.1_RaGOO	40000	43054107	0	0	0.0051	31	23	1.00	0.93	1.36
CM015574.1_RaGOO	41000	43054107	0	0	0.0000	35	26	1.12	1.05	1.34
CM015574.1_RaGOO	42000	43054107	0	0	0.0000	25	19	0.81	0.79	1.30
CM015574.1_RaGOO	43000	43054107	0	0	0.0222	28	19	0.92	0.76	1.53
CM015574.1_RaGOO	44000	43054107	0	0	0.0336	31	22	1.01	0.90	1.42
CM015574.1_RaGOO	45000	43054107	0	0	0.0000	33	26	1.07	1.05	1.28
CM015574.1_RaGOO	46000	43054107	0	0	0.0000	31	24	0.98	0.97	1.27
CM015574.1_RaGOO	47000	43054107	0	0	0.1994	31	29	0.99	1.19	1.05
CM015574.1_RaGOO	48000	43054107	0	1	0.0141	15	14	0.48	0.56	1.09
CM015574.1_RaGOO	49000	43054107	0	1	0.0000	33	24	1.07	0.96	1.41
CM015574.1_RaGOO	50000	43054107	0	0	0.0000	25	20	0.81	0.80	1.28
CM015574.1_RaGOO	51000	43054107	0	0	0.0221	26	19	0.82	0.78	1.33
CM015574.1_RaGOO	52000	43054107	0	0	0.0000	18	12	0.59	0.51	1.47
CM015574.1_RaGOO	53000	43054107	0	0	0.0000	29	18	0.93	0.75	1.56
CM015574.1_RaGOO	54000	43054107	0	0	0.0000	17	15	0.53	0.60	1.12
CM015574.1_RaGOO	55000	43054107	0	0	0.0000	25	22	0.80	0.89	1.14
CM015574.1_RaGOO	56000	43054107	0	0	0.0000	30	24	0.96	0.97	1.24
CM015574.1_RaGOO	57000	43054107	0	0	0.0000	38	25	1.24	1.03	1.51
CM015574.1_RaGOO	58000	43054107	0	0	0.0000	27	25	0.88	1.01	1.09
CM015574.1_RaGOO	59000	43054107	0	0	0.1118	30	25	0.96	1.02	1.19
CM015574.1_RaGOO	60000	43054107	0	0	0.0000	27	23	0.88	0.94	1.18
CM015574.1_RaGOO	61000	43054107	0	0	0.0000	34	22	1.09	0.90	1.52
CM015574.1_RaGOO	62000	43054107	0	0	0.0000	30	23	0.96	0.92	1.32
CM015574.1_RaGOO	63000	43054107	0	0	0.0000	29	22	0.94	0.91	1.29
CM015574.1_RaGOO	64000	43054107	0	0	0.0598	34	29	1.10	1.20	1.15
CM015574.1_RaGOO	65000	43054107	0	0	0.0000	29	22	0.93	0.90	1.31
CM015574.1_RaGOO	66000	43054107	0	0	0.0000	37	28	1.21	1.16	1.31
CM015574.1_RaGOO	67000	43054107	0	0	0.0000	27	31	0.86	1.26	0.86
CM015574.1_RaGOO	68000	43054107	0	0	0.0142	26	21	0.84	0.85	1.25
CM015574.1_RaGOO	69000	43054107	0	0	0.0000	33	20	1.05	0.83	1.60
CM015574.1_RaGOO	70000	43054107	0	0	0.0000	27	20	0.88	0.82	1.36
CM015574.1_RaGOO	71000	43054107	0	0	0.0000	33	22	1.07	0.90	1.49
CM015574.1_RaGOO	72000	43054107	0	6	0.0053	31	25	1.02	1.04	1.24
CM015574.1_RaGOO	73000	43054107	0	0	0.0000	48	42	1.55	1.70	1.15
CM015574.1_RaGOO	74000	43054107	0	0	0.0288	28	20	0.91	0.82	1.40
CM015574.1_RaGOO	75000	43054107	0	0	0.0000	32	20	1.03	0.82	1.59
CM015574.1_RaGOO	76000	43054107	0	0	0.0000	30	19	0.96	0.78	1.54
CM015574.1_RaGOO	77000	43054107	0	0	0.0000	22	14	0.71	0.59	1.52
CM015574.1_RaGOO	78000	43054107	0	0	0.0000	24	23	0.77	0.92	1.06
CM015574.1_RaGOO	79000	43054107	0	0	0.0000	29	22	0.93	0.88	1.33
CM015574.1_RaGOO	80000	43054107	0	0	0.0000	30	21	0.96	0.84	1.45
CM015574.1_RaGOO	81000	43054107	0	0	0.0000	36	31	1.17	1.27	1.15
CM015574.1_RaGOO	82000	43054107	0	0	0.0000	26	24	0.84	0.98	1.08
CM015574.1_RaGOO	83000	43054107	0	0	0.0000	31	25	0.99	1.02	1.23
CM015574.1_RaGOO	84000	43054107	2	0	0.0186	28	28	0.92	1.15	1.00
CM015574.1_RaGOO	85000	43054107	0	0	0.0000	29	20	0.93	0.82	1.44
CM015574.1_RaGOO	86000	43054107	0	0	0.0021	25	21	0.82	0.83	1.24
CM015574.1_RaGOO	87000	43054107	0	0	0.1591	28	17	0.90	0.70	1.61
CM015574.1_RaGOO	88000	43054107	0	0	0.0000	35	23	1.13	0.95	1.49
CM015574.1_RaGOO	89000	43054107	0	0	0.0000	21	18	0.69	0.73	1.19
CM015574.1_RaGOO	90000	43054107	0	0	0.0000	29	20	0.92	0.83	1.40
CM015574.1_RaGOO	91000	43054107	0	0	0.0000	19	17	0.61	0.68	1.14
CM015574.1_RaGOO	92000	43054107	0	0	0.1060	16	15	0.50	0.60	1.06
CM015574.1_RaGOO	93000	43054107	0	0	0.0000	21	20	0.69	0.81	1.07
CM015574.1_RaGOO	94000	43054107	0	0	0.0000	21	21	0.68	0.87	0.98
CM015574.1_RaGOO	95000	43054107	0	0	0.0000	22	14	0.71	0.58	1.54
CM015574.1_RaGOO	96000	43054107	0	0	0.0000	36	24	1.15	0.96	1.52
CM015574.1_RaGOO	97000	43054107	0	0	0.0000	43	38	1.38	1.56	1.11
CM015574.1_RaGOO	98000	43054107	0	0	0.0000	28	19	0.91	0.79	1.46
CM015574.1_RaGOO	99000	43054107	0	0	0.0000	43	35	1.39	1.43	1.23
CM015574.1_RaGOO	100000	43054107	0	0	0.0000	34	25	1.11	1.00	1.40
CM015574.1_RaGOO	101000	43054107	0	0	0.0000	32	25	1.05	1.01	1.31
CM015574.1_RaGOO	102000	43054107	0	0	0.0024	32	24	1.05	0.99	1.34
CM015574.1_RaGOO	103000	43054107	0	0	0.0000	28	20	0.91	0.81	1.42
CM015574.1_RaGOO	104000	43054107	0	0	0.0000	26	18	0.84	0.74	1.42
CM015574.1_RaGOO	105000	43054107	0	0	0.0000	30	22	0.95	0.88	1.36
CM015574.1_RaGOO	106000	43054107	0	0	0.0000	27	24	0.87	0.98	1.11
CM015574.1_RaGOO	107000	43054107	0	0	0.0000	29	23	0.92	0.95	1.22
CM015574.1_RaGOO	108000	43054107	0	0	0.0000	27	23	0.86	0.95	1.14
CM015574.1_RaGOO	109000	43054107	0	0	0.0000	39	25	1.27	1.00	1.60
CM015574.1_RaGOO	110000	43054107	5	0	0.0000	27	21	0.88	0.87	1.28
CM015574.1_RaGOO	111000	43054107	0	0	0.0000	43	31	1.37	1.25	1.38
CM015574.1_RaGOO	112000	43054107	0	0	0.0038	34	26	1.09	1.05	1.31
CM015574.1_RaGOO	113000	43054107	0	0	0.0000	28	26	0.89	1.04	1.08
CM015574.1_RaGOO	114000	43054107	0	0	0.0000	27	23	0.89	0.94	1.19
CM015574.1_RaGOO	115000	43054107	0	0	0.0000	34	22	1.09	0.91	1.51
CM015574.1_RaGOO	116000	43054107	0	0	0.0000	28	23	0.91	0.93	1.24
CM015574.1_RaGOO	117000	43054107	0	0	0.0000	33	25	1.08	1.03	1.32
CM015574.1_RaGOO	118000	43054107	0	0	0.0000	36	25	1.17	1.02	1.44
CM015574.1_RaGOO	119000	43054107	0	0	0.0544	34	19	1.08	0.79	1.73
CM015574.1_RaGOO	120000	43054107	0	0	0.0000	24	15	0.76	0.62	1.54
CM015574.1_RaGOO	121000	43054107	0	0	0.0000	25	22	0.82	0.90	1.15
CM015574.1_RaGOO	122000	43054107	0	0	0.0000	20	18	0.63	0.75	1.06
CM015574.1_RaGOO	123000	43054107	0	0	0.0000	24	16	0.78	0.63	1.55
CM015574.1_RaGOO	124000	43054107	0	0	0.0000	18	19	0.57	0.78	0.92
CM015574.1_RaGOO	125000	43054107	0	0	0.0000	22	23	0.71	0.92	0.98
CM015574.1_RaGOO	126000	43054107	0	0	0.0000	24	20	0.77	0.79	1.23
CM015574.1_RaGOO	127000	43054107	0	0	0.0000	27	20	0.87	0.83	1.32
CM015574.1_RaGOO	128000	43054107	0	0	0.0000	33	28	1.05	1.12	1.18
CM015574.1_RaGOO	129000	43054107	0	0	0.0000	43	28	1.38	1.15	1.51
CM015574.1_RaGOO	130000	43054107	0	0	0.0000	34	29	1.10	1.18	1.17
CM015574.1_RaGOO	131000	43054107	0	0	0.0000	31	26	1.01	1.06	1.21
CM015574.1_RaGOO	132000	43054107	0	0	0.0000	28	22	0.91	0.91	1.26
CM015574.1_RaGOO	133000	43054107	0	0	0.0000	25	21	0.82	0.86	1.20
CM015574.1_RaGOO	134000	43054107	0	0	0.0000	30	24	0.98	0.96	1.29
CM015574.1_RaGOO	135000	43054107	0	0	0.0037	37	28	1.19	1.16	1.30
CM015574.1_RaGOO	136000	43054107	0	0	0.0000	38	23	1.24	0.93	1.68
CM015574.1_RaGOO	137000	43054107	0	0	0.0000	33	21	1.05	0.87	1.53
CM015574.1_RaGOO	138000	43054107	0	0	0.0000	27	23	0.88	0.95	1.17
CM015574.1_RaGOO	139000	43054107	0	0	0.0000	30	24	0.96	0.97	1.24
CM015574.1_RaGOO	140000	43054107	0	0	0.0000	29	26	0.94	1.04	1.14
CM015574.1_RaGOO	141000	43054107	0	0	0.0000	31	29	1.01	1.17	1.09
CM015574.1_RaGOO	142000	43054107	0	0	0.0000	36	30	1.16	1.22	1.20
CM015574.1_RaGOO	143000	43054107	0	0	0.0000	28	25	0.91	1.03	1.12
CM015574.1_RaGOO	144000	43054107	0	0	0.0000	34	21	1.09	0.87	1.59
CM015574.1_RaGOO	145000	43054107	0	0	0.0000	21	22	0.66	0.91	0.92
CM015574.1_RaGOO	146000	43054107	0	0	0.0000	24	22	0.79	0.88	1.12
CM015574.1_RaGOO	147000	43054107	0	0	0.0000	31	23	1.01	0.93	1.37
CM015574.1_RaGOO	148000	43054107	0	0	0.0000	28	23	0.89	0.92	1.23
CM015574.1_RaGOO	149000	43054107	0	0	0.0000	31	25	1.00	1.01	1.24
CM015574.1_RaGOO	150000	43054107	0	0	0.0000	34	25	1.10	1.02	1.36
CM015574.1_RaGOO	151000	43054107	0	0	0.0000	28	24	0.90	0.97	1.18
CM015574.1_RaGOO	152000	43054107	0	0	0.0000	34	26	1.08	1.04	1.31
CM015574.1_RaGOO	153000	43054107	0	0	0.0000	25	25	0.80	1.02	0.99
CM015574.1_RaGOO	154000	43054107	0	0	0.0323	26	20	0.84	0.81	1.31
CM015574.1_RaGOO	155000	43054107	0	0	0.0000	20	17	0.63	0.69	1.15
CM015574.1_RaGOO	156000	43054107	0	0	0.0000	30	23	0.96	0.94	1.28
CM015574.1_RaGOO	157000	43054107	0	0	0.0000	34	23	1.10	0.93	1.49
CM015574.1_RaGOO	158000	43054107	0	0	0.0000	28	22	0.91	0.88	1.32
CM015574.1_RaGOO	159000	43054107	0	0	0.0206	14	17	0.44	0.71	0.78
CM015574.1_RaGOO	160000	43054107	0	0	0.0000	21	22	0.69	0.91	0.96
CM015574.1_RaGOO	161000	43054107	0	0	0.0000	21	17	0.68	0.70	1.23
CM015574.1_RaGOO	162000	43054107	0	0	0.0000	26	22	0.85	0.87	1.22
CM015574.1_RaGOO	163000	43054107	0	0	0.0015	23	22	0.75	0.89	1.06
CM015574.1_RaGOO	164000	43054107	0	0	0.0000	30	19	0.96	0.79	1.54
CM015574.1_RaGOO	165000	43054107	0	0	0.0000	27	19	0.88	0.77	1.44
CM015574.1_RaGOO	166000	43054107	0	0	0.0000	27	16	0.86	0.63	1.70
CM015574.1_RaGOO	167000	43054107	0	0	0.0237	29	25	0.93	1.00	1.17
CM015574.1_RaGOO	168000	43054107	0	0	0.0000	42	24	1.35	0.99	1.71
CM015574.1_RaGOO	169000	43054107	0	0	0.0000	32	25	1.03	1.01	1.29
CM015574.1_RaGOO	170000	43054107	0	0	0.0000	33	21	1.06	0.87	1.53
CM015574.1_RaGOO	171000	43054107	0	0	0.0000	33	25	1.06	1.02	1.30
CM015574.1_RaGOO	172000	43054107	0	0	0.0000	36	22	1.17	0.90	1.63
CM015574.1_RaGOO	173000	43054107	0	0	0.0000	40	21	1.28	0.85	1.91
CM015574.1_RaGOO	174000	43054107	0	0	0.0000	24	22	0.77	0.88	1.10
CM015574.1_RaGOO	175000	43054107	0	0	0.0138	23	20	0.75	0.83	1.14
CM015574.1_RaGOO	176000	43054107	0	0	0.0000	22	21	0.70	0.87	1.02
CM015574.1_RaGOO	177000	43054107	0	0	0.0005	21	19	0.69	0.79	1.11
CM015574.1_RaGOO	178000	43054107	0	0	0.0000	18	14	0.58	0.57	1.27
CM015574.1_RaGOO	179000	43054107	0	1	0.0000	22	18	0.71	0.74	1.20
CM015574.1_RaGOO	180000	43054107	0	0	0.0000	26	22	0.82	0.89	1.17
CM015574.1_RaGOO	181000	43054107	0	0	0.0000	30	20	0.96	0.79	1.52
CM015574.1_RaGOO	182000	43054107	0	0	0.0000	19	15	0.60	0.60	1.26
CM015574.1_RaGOO	183000	43054107	0	0	0.0000	30	22	0.96	0.87	1.39
CM015574.1_RaGOO	184000	43054107	0	0	0.0000	32	20	1.04	0.81	1.61
CM015574.1_RaGOO	185000	43054107	0	0	0.0059	28	23	0.92	0.95	1.21
CM015574.1_RaGOO	186000	43054107	0	0	0.0238	30	19	0.97	0.78	1.57
CM015574.1_RaGOO	187000	43054107	0	0	0.0000	32	23	1.02	0.92	1.40
CM015574.1_RaGOO	188000	43054107	0	0	0.0000	51	34	1.64	1.39	1.49
CM015574.1_RaGOO	189000	43054107	0	0	0.0000	27	15	0.88	0.60	1.86
CM015574.1_RaGOO	190000	43054107	0	0	0.0000	20	16	0.66	0.63	1.31
CM015574.1_RaGOO	191000	43054107	0	0	0.0000	19	21	0.60	0.87	0.87
CM015574.1_RaGOO	192000	43054107	0	0	0.0000	17	18	0.55	0.71	0.97
CM015574.1_RaGOO	193000	43054107	0	0	0.0342	20	18	0.65	0.73	1.12
CM015574.1_RaGOO	194000	43054107	0	0	0.0000	35	27	1.14	1.09	1.32
CM015574.1_RaGOO	195000	43054107	0	0	0.0000	21	10	0.67	0.42	2.03
CM015574.1_RaGOO	196000	43054107	0	0	0.0000	25	15	0.81	0.62	1.64
CM015574.1_RaGOO	197000	43054107	0	0	0.0000	22	18	0.72	0.71	1.27
CM015574.1_RaGOO	198000	43054107	0	0	0.0000	26	21	0.85	0.84	1.27
CM015574.1_RaGOO	199000	43054107	0	0	0.0000	29	16	0.93	0.63	1.86
CM015574.1_RaGOO	200000	43054107	0	0	0.0000	31	22	0.99	0.91	1.38
CM015574.1_RaGOO	201000	43054107	0	0	0.0000	30	19	0.96	0.78	1.55
CM015574.1_RaGOO	202000	43054107	0	0	0.0000	24	18	0.78	0.72	1.36
CM015574.1_RaGOO	203000	43054107	0	0	0.0000	25	14	0.80	0.57	1.77
CM015574.1_RaGOO	204000	43054107	0	0	0.0150	27	20	0.88	0.80	1.40
CM015574.1_RaGOO	205000	43054107	0	0	0.0268	25	18	0.81	0.75	1.35
CM015574.1_RaGOO	206000	43054107	0	0	0.0000	31	21	0.98	0.84	1.47
CM015574.1_RaGOO	207000	43054107	0	0	0.0000	32	26	1.02	1.07	1.20
CM015574.1_RaGOO	208000	43054107	0	0	0.0000	26	28	0.85	1.12	0.96
CM015574.1_RaGOO	209000	43054107	0	0	0.0000	31	27	1.02	1.08	1.18
CM015574.1_RaGOO	210000	43054107	0	0	0.0000	36	22	1.18	0.90	1.65
CM015574.1_RaGOO	211000	43054107	0	0	0.1889	35	26	1.14	1.05	1.38
CM015574.1_RaGOO	212000	43054107	0	0	0.0108	24	20	0.78	0.82	1.20
CM015574.1_RaGOO	213000	43054107	0	0	0.0000	23	23	0.73	0.93	0.99
CM015574.1_RaGOO	214000	43054107	0	0	0.0000	24	21	0.76	0.84	1.14
CM015574.1_RaGOO	215000	43054107	0	0	0.0000	23	23	0.75	0.95	0.99
CM015574.1_RaGOO	216000	43054107	0	0	0.0379	25	20	0.81	0.81	1.27
CM015574.1_RaGOO	217000	43054107	0	0	0.0984	28	21	0.89	0.86	1.32
CM015574.1_RaGOO	218000	43054107	0	0	0.0000	24	23	0.78	0.93	1.06
CM015574.1_RaGOO	219000	43054107	0	0	0.0000	20	18	0.63	0.75	1.06
CM015574.1_RaGOO	220000	43054107	0	0	0.0000	30	27	0.95	1.09	1.10
CM015574.1_RaGOO	221000	43054107	0	0	0.0000	29	25	0.93	1.02	1.15
CM015574.1_RaGOO	222000	43054107	0	0	0.0000	27	18	0.88	0.72	1.53
CM015574.1_RaGOO	223000	43054107	0	0	0.0000	27	22	0.86	0.90	1.21
CM015574.1_RaGOO	224000	43054107	0	0	0.0000	29	24	0.95	0.97	1.23
CM015574.1_RaGOO	225000	43054107	0	1	0.0000	42	33	1.35	1.35	1.26
CM015574.1_RaGOO	226000	43054107	0	0	0.0000	37	25	1.20	1.02	1.48
CM015574.1_RaGOO	227000	43054107	0	0	0.0000	33	23	1.06	0.94	1.43
CM015574.1_RaGOO	228000	43054107	0	0	0.0000	32	23	1.05	0.92	1.43
CM015574.1_RaGOO	229000	43054107	0	0	0.0000	28	22	0.89	0.91	1.24
CM015574.1_RaGOO	230000	43054107	0	0	0.0826	26	23	0.84	0.92	1.16
CM015574.1_RaGOO	231000	43054107	0	0	0.0000	26	24	0.83	0.97	1.09
CM015574.1_RaGOO	232000	43054107	0	0	0.0000	32	26	1.02	1.05	1.22
CM015574.1_RaGOO	233000	43054107	0	0	0.0000	33	24	1.06	0.99	1.35
CM015574.1_RaGOO	234000	43054107	0	0	0.0000	26	21	0.84	0.87	1.22
CM015574.1_RaGOO	235000	43054107	0	0	0.0000	27	26	0.86	1.07	1.01
CM015574.1_RaGOO	236000	43054107	0	0	0.0000	36	27	1.15	1.10	1.32
CM015574.1_RaGOO	237000	43054107	0	0	0.0000	31	27	1.01	1.11	1.14
CM015574.1_RaGOO	238000	43054107	0	0	0.0000	33	26	1.08	1.04	1.31
CM015574.1_RaGOO	239000	43054107	0	0	0.0000	30	27	0.97	1.08	1.13
CM015574.1_RaGOO	240000	43054107	0	0	0.0105	20	23	0.66	0.92	0.90
CM015574.1_RaGOO	241000	43054107	0	1	0.0000	24	22	0.78	0.89	1.11
CM015574.1_RaGOO	242000	43054107	0	0	0.0000	23	22	0.75	0.88	1.07
CM015574.1_RaGOO	243000	43054107	0	0	0.0000	28	24	0.89	0.96	1.16
CM015574.1_RaGOO	244000	43054107	0	0	0.0128	31	29	1.00	1.18	1.06
CM015574.1_RaGOO	245000	43054107	1	0	0.0000	27	23	0.88	0.94	1.17
CM015574.1_RaGOO	246000	43054107	2	0	0.0000	30	24	0.98	0.96	1.29
CM015574.1_RaGOO	247000	43054107	0	0	0.0108	32	29	1.02	1.17	1.10
CM015574.1_RaGOO	248000	43054107	0	0	0.0000	28	27	0.91	1.10	1.05
CM015574.1_RaGOO	249000	43054107	0	0	0.0000	29	19	0.93	0.79	1.49
CM015574.1_RaGOO	250000	43054107	0	0	0.0000	32	29	1.03	1.17	1.12
CM015574.1_RaGOO	251000	43054107	0	0	0.0000	31	27	1.01	1.08	1.18
CM015574.1_RaGOO	252000	43054107	0	0	0.0000	36	22	1.15	0.91	1.59
CM015574.1_RaGOO	253000	43054107	0	0	0.0000	35	24	1.12	0.99	1.42
CM015574.1_RaGOO	254000	43054107	0	0	0.0000	25	18	0.82	0.73	1.41
CM015574.1_RaGOO	255000	43054107	1	0	0.0000	29	24	0.93	0.96	1.22
CM015574.1_RaGOO	256000	43054107	0	0	0.0000	29	25	0.94	1.01	1.18
CM015574.1_RaGOO	257000	43054107	0	0	0.0000	32	21	1.03	0.84	1.54
CM015574.1_RaGOO	258000	43054107	0	0	0.0000	32	23	1.03	0.93	1.38
CM015574.1_RaGOO	259000	43054107	0	0	0.0000	30	25	0.98	1.01	1.22
CM015574.1_RaGOO	260000	43054107	0	0	0.0000	34	25	1.10	1.00	1.39
CM015574.1_RaGOO	261000	43054107	0	0	0.0000	19	13	0.62	0.53	1.48
CM015574.1_RaGOO	262000	43054107	0	0	0.0000	26	20	0.85	0.82	1.29
CM015574.1_RaGOO	263000	43054107	0	0	0.0000	31	23	0.98	0.94	1.32
CM015574.1_RaGOO	264000	43054107	0	0	0.0000	31	26	1.00	1.06	1.20
CM015574.1_RaGOO	265000	43054107	0	0	0.0000	25	13	0.81	0.54	1.89
CM015574.1_RaGOO	266000	43054107	0	0	0.0000	37	22	1.19	0.90	1.66
CM015574.1_RaGOO	267000	43054107	0	0	0.0000	28	26	0.90	1.06	1.07
CM015574.1_RaGOO	268000	43054107	0	0	0.0000	28	22	0.89	0.89	1.27
CM015574.1_RaGOO	269000	43054107	0	0	0.0451	26	19	0.83	0.78	1.34
CM015574.1_RaGOO	270000	43054107	0	0	0.0000	24	26	0.77	1.05	0.92
CM015574.1_RaGOO	271000	43054107	0	0	0.0000	20	20	0.66	0.83	1.00
CM015574.1_RaGOO	272000	43054107	0	0	0.0093	24	20	0.77	0.82	1.17
CM015574.1_RaGOO	273000	43054107	0	0	0.0000	31	25	0.99	1.01	1.23
CM015574.1_RaGOO	274000	43054107	0	0	0.0000	32	19	1.03	0.76	1.71
CM015574.1_RaGOO	275000	43054107	0	0	0.0000	34	26	1.10	1.05	1.33
CM015574.1_RaGOO	276000	43054107	0	0	0.0000	32	22	1.04	0.88	1.50
CM015574.1_RaGOO	277000	43054107	0	0	0.0000	33	20	1.06	0.83	1.62
CM015574.1_RaGOO	278000	43054107	0	0	0.0000	28	28	0.90	1.13	1.00
CM015574.1_RaGOO	279000	43054107	0	0	0.0000	11	10	0.37	0.39	1.19
CM015574.1_RaGOO	280000	43054107	0	0	0.0000	17	17	0.54	0.67	1.02
CM015574.1_RaGOO	281000	43054107	0	0	0.0000	23	18	0.73	0.74	1.25
CM015574.1_RaGOO	282000	43054107	0	0	0.0000	23	12	0.76	0.48	2.00
CM015574.1_RaGOO	283000	43054107	0	0	0.0000	21	16	0.68	0.67	1.28
CM015574.1_RaGOO	284000	43054107	0	0	0.0185	20	20	0.64	0.80	1.01
CM015574.1_RaGOO	285000	43054107	0	0	0.0000	20	11	0.64	0.43	1.88
CM015574.1_RaGOO	286000	43054107	0	5	0.0174	23	15	0.74	0.61	1.53
CM015574.1_RaGOO	287000	43054107	0	0	0.0000	25	21	0.81	0.83	1.23
CM015574.1_RaGOO	288000	43054107	0	0	0.0000	24	22	0.77	0.89	1.09
CM015574.1_RaGOO	289000	43054107	1	0	0.0000	18	16	0.59	0.65	1.14
CM015574.1_RaGOO	290000	43054107	0	0	0.0000	23	20	0.73	0.83	1.12
CM015574.1_RaGOO	291000	43054107	0	0	0.0243	23	19	0.74	0.77	1.21
CM015574.1_RaGOO	292000	43054107	0	0	0.0349	27	20	0.87	0.83	1.32
CM015574.1_RaGOO	293000	43054107	0	0	0.0000	39	20	1.26	0.80	1.99
CM015574.1_RaGOO	294000	43054107	0	0	0.0000	28	30	0.90	1.22	0.93
CM015574.1_RaGOO	295000	43054107	0	0	0.0000	25	21	0.82	0.84	1.23
CM015574.1_RaGOO	296000	43054107	0	0	0.0077	29	21	0.93	0.87	1.36
CM015574.1_RaGOO	297000	43054107	0	0	0.0000	36	22	1.17	0.89	1.66
CM015574.1_RaGOO	298000	43054107	0	0	0.0000	29	19	0.94	0.76	1.57
CM015574.1_RaGOO	299000	43054107	0	12	0.0170	27	20	0.87	0.83	1.32
CM015574.1_RaGOO	300000	43054107	0	0	0.0000	25	19	0.80	0.79	1.27
CM015574.1_RaGOO	301000	43054107	0	0	0.0000	21	19	0.67	0.77	1.10
CM015574.1_RaGOO	302000	43054107	0	0	0.0000	28	18	0.89	0.75	1.51
CM015574.1_RaGOO	303000	43054107	0	0	0.0000	24	18	0.79	0.73	1.36
CM015574.1_RaGOO	304000	43054107	0	0	0.0000	29	22	0.93	0.89	1.31
CM015574.1_RaGOO	305000	43054107	0	0	0.0000	26	22	0.83	0.88	1.19
CM015574.1_RaGOO	306000	43054107	0	0	0.0000	26	21	0.83	0.87	1.20
CM015574.1_RaGOO	307000	43054107	7	2	0.0366	19	16	0.62	0.65	1.21
CM015574.1_RaGOO	308000	43054107	0	0	0.0000	18	14	0.59	0.58	1.28
CM015574.1_RaGOO	309000	43054107	6	0	0.0347	24	19	0.77	0.79	1.24
CM015574.1_RaGOO	310000	43054107	0	0	0.0000	38	35	1.24	1.43	1.09
CM015574.1_RaGOO	311000	43054107	0	0	0.0000	45	34	1.44	1.39	1.30
CM015574.1_RaGOO	312000	43054107	0	0	0.0000	26	19	0.84	0.78	1.36
CM015574.1_RaGOO	313000	43054107	0	0	0.0000	22	21	0.70	0.86	1.02
CM015574.1_RaGOO	314000	43054107	1	0	0.0000	18	12	0.58	0.49	1.49
CM015574.1_RaGOO	315000	43054107	0	0	0.0000	25	18	0.80	0.74	1.37
CM015574.1_RaGOO	316000	43054107	0	0	0.0000	20	18	0.63	0.72	1.11
CM015574.1_RaGOO	317000	43054107	0	0	0.0000	18	15	0.57	0.62	1.17
CM015574.1_RaGOO	318000	43054107	0	0	0.0000	42	39	1.36	1.60	1.07
CM015574.1_RaGOO	319000	43054107	0	1	0.0000	24	25	0.79	1.03	0.96
CM015574.1_RaGOO	320000	43054107	0	0	0.0000	26	22	0.84	0.88	1.20
CM015574.1_RaGOO	321000	43054107	0	0	0.0000	31	24	1.01	0.98	1.30
CM015574.1_RaGOO	322000	43054107	0	0	0.0000	32	25	1.04	1.02	1.28
CM015574.1_RaGOO	323000	43054107	0	0	0.0000	27	24	0.87	0.98	1.12
CM015574.1_RaGOO	324000	43054107	0	0	0.0000	33	28	1.05	1.16	1.15
CM015574.1_RaGOO	325000	43054107	0	0	0.0000	36	23	1.15	0.93	1.55
CM015574.1_RaGOO	326000	43054107	0	0	0.0171	55	41	1.77	1.66	1.34
CM015574.1_RaGOO	327000	43054107	0	0	0.0000	29	20	0.92	0.83	1.40
CM015574.1_RaGOO	328000	43054107	0	0	0.0000	22	20	0.72	0.81	1.12
CM015574.1_RaGOO	329000	43054107	0	0	0.0000	25	19	0.80	0.79	1.28
CM015574.1_RaGOO	330000	43054107	0	0	0.0000	26	23	0.84	0.95	1.11
CM015574.1_RaGOO	331000	43054107	0	0	0.0000	27	21	0.87	0.84	1.32
CM015574.1_RaGOO	332000	43054107	0	0	0.0000	25	24	0.82	0.96	1.07
CM015574.1_RaGOO	333000	43054107	0	0	0.0000	31	23	0.99	0.92	1.36
CM015574.1_RaGOO	334000	43054107	0	0	0.0000	28	22	0.89	0.90	1.25
CM015574.1_RaGOO	335000	43054107	1	0	0.0000	32	24	1.04	0.97	1.35
CM015574.1_RaGOO	336000	43054107	0	0	0.0000	27	19	0.86	0.75	1.45
CM015574.1_RaGOO	337000	43054107	0	0	0.0000	29	24	0.93	0.96	1.23
CM015574.1_RaGOO	338000	43054107	0	0	0.0000	35	25	1.14	1.01	1.43
CM015574.1_RaGOO	339000	43054107	0	0	0.0000	29	22	0.95	0.88	1.36
CM015574.1_RaGOO	340000	43054107	0	0	0.0000	28	20	0.89	0.80	1.41
CM015574.1_RaGOO	341000	43054107	0	0	0.0000	27	18	0.87	0.75	1.46
CM015574.1_RaGOO	342000	43054107	0	0	0.0000	34	24	1.09	0.98	1.40
CM015574.1_RaGOO	343000	43054107	0	0	0.0000	35	23	1.14	0.93	1.55
CM015574.1_RaGOO	344000	43054107	0	0	0.0000	34	21	1.09	0.87	1.58
CM015574.1_RaGOO	345000	43054107	0	0	0.0000	20	16	0.65	0.64	1.29
CM015574.1_RaGOO	346000	43054107	0	0	0.0000	27	20	0.88	0.80	1.39
CM015574.1_RaGOO	347000	43054107	0	0	0.0000	18	19	0.58	0.77	0.94
CM015574.1_RaGOO	348000	43054107	0	0	0.0000	24	17	0.78	0.68	1.45
CM015574.1_RaGOO	349000	43054107	0	0	0.0000	14	13	0.47	0.54	1.08
CM015574.1_RaGOO	350000	43054107	0	0	0.0000	27	21	0.87	0.87	1.26
CM015574.1_RaGOO	351000	43054107	0	0	0.0000	28	21	0.89	0.85	1.32
CM015574.1_RaGOO	352000	43054107	0	1	0.0000	26	20	0.83	0.82	1.27
CM015574.1_RaGOO	353000	43054107	0	0	0.0000	25	22	0.81	0.88	1.17
CM015574.1_RaGOO	354000	43054107	0	0	0.0000	28	21	0.90	0.87	1.31
CM015574.1_RaGOO	355000	43054107	0	0	0.0000	31	25	1.00	1.03	1.22
CM015574.1_RaGOO	356000	43054107	0	0	0.0242	32	29	1.04	1.17	1.12
CM015574.1_RaGOO	357000	43054107	0	0	0.0000	28	25	0.90	1.01	1.12
CM015574.1_RaGOO	358000	43054107	0	0	0.0000	29	22	0.93	0.88	1.34
CM015574.1_RaGOO	359000	43054107	0	0	0.0000	26	19	0.85	0.78	1.38
CM015574.1_RaGOO	360000	43054107	0	0	0.0000	33	26	1.08	1.04	1.31
CM015574.1_RaGOO	361000	43054107	0	0	0.0000	25	20	0.79	0.81	1.24
CM015574.1_RaGOO	362000	43054107	0	0	0.0000	27	22	0.86	0.88	1.23
CM015574.1_RaGOO	363000	43054107	0	0	0.0000	25	17	0.81	0.70	1.46
CM015574.1_RaGOO	364000	43054107	0	0	0.0730	28	18	0.90	0.72	1.57
CM015574.1_RaGOO	365000	43054107	0	0	0.0889	30	23	0.98	0.92	1.34
CM015574.1_RaGOO	366000	43054107	0	0	0.0174	26	20	0.83	0.83	1.27
CM015574.1_RaGOO	367000	43054107	2	0	0.0865	31	22	1.01	0.90	1.41
CM015574.1_RaGOO	368000	43054107	0	0	0.0000	25	18	0.81	0.72	1.42
CM015574.1_RaGOO	369000	43054107	2	0	0.0000	24	17	0.78	0.70	1.41
CM015574.1_RaGOO	370000	43054107	0	0	0.0000	30	20	0.97	0.81	1.52
CM015574.1_RaGOO	371000	43054107	0	0	0.0000	22	17	0.71	0.71	1.27
CM015574.1_RaGOO	372000	43054107	0	0	0.0273	28	18	0.90	0.72	1.57
CM015574.1_RaGOO	373000	43054107	0	0	0.0000	23	16	0.75	0.66	1.44
CM015574.1_RaGOO	374000	43054107	0	0	0.0000	17	16	0.55	0.64	1.09
CM015574.1_RaGOO	375000	43054107	0	0	0.0136	23	21	0.75	0.86	1.11
CM015574.1_RaGOO	376000	43054107	0	0	0.0000	23	18	0.76	0.73	1.31
CM015574.1_RaGOO	377000	43054107	0	0	0.0000	25	19	0.79	0.76	1.30
CM015574.1_RaGOO	378000	43054107	0	0	0.0000	25	21	0.81	0.86	1.19
CM015574.1_RaGOO	379000	43054107	0	0	0.0000	27	18	0.88	0.71	1.56
CM015574.1_RaGOO	380000	43054107	0	0	0.0000	22	21	0.72	0.84	1.08
CM015574.1_RaGOO	381000	43054107	0	0	0.0016	30	22	0.97	0.90	1.36
CM015574.1_RaGOO	382000	43054107	0	0	0.0000	26	24	0.85	0.99	1.08
CM015574.1_RaGOO	383000	43054107	0	0	0.0000	25	24	0.79	0.96	1.04
CM015574.1_RaGOO	384000	43054107	0	0	0.0000	19	21	0.62	0.86	0.91
CM015574.1_RaGOO	385000	43054107	0	0	0.0000	28	17	0.89	0.71	1.59
CM015574.1_RaGOO	386000	43054107	0	0	0.0000	17	21	0.56	0.87	0.82
CM015574.1_RaGOO	387000	43054107	0	0	0.0000	25	19	0.80	0.79	1.28
CM015574.1_RaGOO	388000	43054107	0	0	0.0000	22	17	0.72	0.68	1.33
CM015574.1_RaGOO	389000	43054107	0	0	0.0422	24	19	0.77	0.75	1.28
CM015574.1_RaGOO	390000	43054107	0	0	0.0000	45	33	1.47	1.36	1.36
CM015574.1_RaGOO	391000	43054107	0	0	0.0000	22	16	0.70	0.66	1.34
CM015574.1_RaGOO	392000	43054107	1	0	0.0000	25	18	0.82	0.74	1.41
CM015574.1_RaGOO	393000	43054107	0	0	0.0000	25	22	0.82	0.88	1.18
CM015574.1_RaGOO	394000	43054107	0	0	0.0296	24	21	0.79	0.87	1.15
CM015574.1_RaGOO	395000	43054107	0	0	0.0000	19	15	0.60	0.63	1.21
CM015574.1_RaGOO	396000	43054107	0	0	0.0000	28	20	0.91	0.81	1.43
CM015574.1_RaGOO	397000	43054107	0	0	0.0000	30	22	0.97	0.89	1.37
CM015574.1_RaGOO	398000	43054107	0	0	0.0432	28	24	0.89	0.99	1.14
CM015574.1_RaGOO	399000	43054107	0	0	0.0041	28	22	0.91	0.89	1.28
CM015574.1_RaGOO	400000	43054107	0	0	0.0000	25	24	0.80	0.98	1.02
CM015574.1_RaGOO	401000	43054107	0	0	0.0071	27	20	0.87	0.83	1.33
CM015574.1_RaGOO	402000	43054107	0	0	0.0000	26	20	0.85	0.83	1.30
CM015574.1_RaGOO	403000	43054107	0	0	0.0000	30	24	0.96	0.96	1.26
CM015574.1_RaGOO	404000	43054107	0	0	0.0000	28	24	0.89	0.97	1.16
CM015574.1_RaGOO	405000	43054107	0	0	0.0038	40	32	1.28	1.30	1.24
CM015574.1_RaGOO	406000	43054107	0	0	0.0000	28	18	0.91	0.73	1.57
CM015574.1_RaGOO	407000	43054107	0	0	0.0000	27	19	0.88	0.79	1.41
CM015574.1_RaGOO	408000	43054107	0	0	0.0000	18	11	0.59	0.46	1.61
CM015574.1_RaGOO	409000	43054107	0	0	0.0000	25	19	0.82	0.78	1.33
CM015574.1_RaGOO	410000	43054107	0	0	0.0000	25	22	0.80	0.90	1.12
CM015574.1_RaGOO	411000	43054107	0	0	0.0034	24	15	0.79	0.63	1.58
CM015574.1_RaGOO	412000	43054107	0	0	0.0000	21	20	0.69	0.81	1.07
CM015574.1_RaGOO	413000	43054107	0	0	0.0000	25	24	0.80	0.97	1.04
CM015574.1_RaGOO	414000	43054107	0	0	0.0048	27	22	0.88	0.89	1.25
CM015574.1_RaGOO	415000	43054107	0	0	0.0000	32	25	1.04	1.04	1.26
CM015574.1_RaGOO	416000	43054107	0	0	0.0000	35	28	1.14	1.15	1.25
CM015574.1_RaGOO	417000	43054107	0	0	0.0000	28	26	0.92	1.06	1.09
CM015574.1_RaGOO	418000	43054107	0	0	0.0070	39	30	1.25	1.22	1.29
CM015574.1_RaGOO	419000	43054107	0	0	0.0000	37	22	1.21	0.88	1.74
CM015574.1_RaGOO	420000	43054107	0	0	0.0308	26	19	0.85	0.78	1.38
CM015574.1_RaGOO	421000	43054107	0	0	0.0000	33	23	1.07	0.93	1.45
CM015574.1_RaGOO	422000	43054107	0	0	0.0000	28	20	0.92	0.83	1.39
CM015574.1_RaGOO	423000	43054107	0	0	0.0051	23	11	0.74	0.46	2.04
CM015574.1_RaGOO	424000	43054107	0	0	0.0000	25	19	0.80	0.79	1.28
CM015574.1_RaGOO	425000	43054107	0	0	0.0068	28	18	0.90	0.73	1.57
CM015574.1_RaGOO	426000	43054107	0	0	0.0000	27	22	0.88	0.88	1.25
CM015574.1_RaGOO	427000	43054107	0	0	0.0004	31	23	1.01	0.91	1.39
CM015574.1_RaGOO	428000	43054107	0	0	0.0000	26	21	0.84	0.84	1.26
CM015574.1_RaGOO	429000	43054107	0	0	0.0000	31	25	1.00	1.02	1.24
CM015574.1_RaGOO	430000	43054107	0	0	0.0038	32	23	1.03	0.92	1.42
CM015574.1_RaGOO	431000	43054107	0	0	0.0000	31	22	1.00	0.87	1.44
CM015574.1_RaGOO	432000	43054107	0	5	0.0000	25	20	0.80	0.80	1.27
CM015574.1_RaGOO	433000	43054107	0	0	0.0413	25	25	0.81	1.03	0.99
CM015574.1_RaGOO	434000	43054107	0	0	0.1225	26	23	0.83	0.93	1.12
CM015574.1_RaGOO	435000	43054107	0	0	0.0000	29	21	0.95	0.84	1.43
CM015574.1_RaGOO	436000	43054107	0	0	0.0000	37	25	1.19	1.03	1.45
CM015574.1_RaGOO	437000	43054107	0	0	0.0000	31	27	0.99	1.11	1.13
CM015574.1_RaGOO	438000	43054107	0	0	0.0000	33	26	1.07	1.04	1.30
CM015574.1_RaGOO	439000	43054107	0	0	0.0000	27	29	0.88	1.16	0.95
CM015574.1_RaGOO	440000	43054107	0	0	0.0000	32	30	1.05	1.24	1.06
CM015574.1_RaGOO	441000	43054107	0	0	0.0000	32	26	1.04	1.06	1.24
CM015574.1_RaGOO	442000	43054107	0	0	0.0000	28	24	0.90	0.97	1.16
CM015574.1_RaGOO	443000	43054107	0	0	0.0000	29	20	0.92	0.82	1.42
CM015574.1_RaGOO	444000	43054107	0	0	0.0000	29	24	0.94	0.98	1.22
CM015574.1_RaGOO	445000	43054107	0	0	0.0000	22	22	0.73	0.91	1.00
CM015574.1_RaGOO	446000	43054107	0	0	0.0000	22	20	0.71	0.82	1.10
CM015574.1_RaGOO	447000	43054107	0	0	0.0000	48	32	1.55	1.31	1.49
CM015574.1_RaGOO	448000	43054107	0	0	0.0000	49	35	1.59	1.44	1.39
CM015574.1_RaGOO	449000	43054107	0	0	0.0000	47	35	1.52	1.41	1.36
CM015574.1_RaGOO	450000	43054107	0	4	0.0000	25	19	0.80	0.75	1.34
CM015574.1_RaGOO	451000	43054107	0	0	0.0299	26	21	0.84	0.87	1.21
CM015574.1_RaGOO	452000	43054107	0	0	0.0000	20	18	0.63	0.72	1.10
CM015574.1_RaGOO	453000	43054107	0	0	0.0516	24	16	0.77	0.66	1.47
CM015574.1_RaGOO	454000	43054107	0	0	0.0000	20	16	0.65	0.65	1.26
CM015574.1_RaGOO	455000	43054107	0	0	0.0652	21	22	0.69	0.88	0.99
CM015574.1_RaGOO	456000	43054107	0	0	0.0000	16	14	0.52	0.56	1.16
CM015574.1_RaGOO	457000	43054107	0	0	0.0000	18	12	0.58	0.49	1.48
CM015574.1_RaGOO	458000	43054107	1	0	0.0000	21	14	0.68	0.58	1.48
CM015574.1_RaGOO	459000	43054107	0	0	0.0000	18	21	0.57	0.85	0.85
CM015574.1_RaGOO	460000	43054107	0	0	0.0773	29	21	0.94	0.87	1.36
CM015574.1_RaGOO	461000	43054107	0	0	0.0000	25	19	0.80	0.76	1.33
CM015574.1_RaGOO	462000	43054107	0	0	0.0000	22	20	0.71	0.82	1.09
CM015574.1_RaGOO	463000	43054107	0	0	0.0000	22	21	0.71	0.84	1.06
CM015574.1_RaGOO	464000	43054107	0	0	0.0000	26	21	0.84	0.87	1.21
CM015574.1_RaGOO	465000	43054107	0	0	0.0000	21	21	0.69	0.85	1.03
CM015574.1_RaGOO	466000	43054107	0	0	0.0000	25	18	0.80	0.73	1.38
CM015574.1_RaGOO	467000	43054107	0	0	0.0000	31	25	1.00	1.00	1.26
CM015574.1_RaGOO	468000	43054107	0	0	0.0000	26	24	0.83	0.98	1.06
CM015574.1_RaGOO	469000	43054107	0	0	0.0000	28	27	0.92	1.12	1.04
CM015574.1_RaGOO	470000	43054107	0	0	0.0000	23	18	0.74	0.73	1.28
CM015574.1_RaGOO	471000	43054107	0	0	0.0005	25	24	0.81	0.99	1.03
CM015574.1_RaGOO	472000	43054107	0	0	0.0000	29	25	0.92	1.02	1.14
CM015574.1_RaGOO	473000	43054107	0	0	0.0000	30	20	0.97	0.83	1.47
CM015574.1_RaGOO	474000	43054107	0	0	0.0198	36	24	1.16	0.98	1.49
CM015574.1_RaGOO	475000	43054107	0	0	0.0000	35	29	1.11	1.16	1.21
CM015574.1_RaGOO	476000	43054107	0	0	0.0000	38	29	1.22	1.17	1.31
CM015574.1_RaGOO	477000	43054107	0	0	0.0000	33	19	1.05	0.76	1.75
CM015574.1_RaGOO	478000	43054107	0	0	0.0000	27	17	0.86	0.71	1.52
CM015574.1_RaGOO	479000	43054107	0	0	0.0000	23	23	0.73	0.94	0.99
CM015574.1_RaGOO	480000	43054107	0	0	0.0028	27	16	0.87	0.65	1.68
CM015574.1_RaGOO	481000	43054107	0	0	0.0000	17	16	0.53	0.64	1.04
CM015574.1_RaGOO	482000	43054107	0	0	0.0000	23	19	0.74	0.78	1.20
CM015574.1_RaGOO	483000	43054107	0	0	0.0000	18	13	0.59	0.54	1.37
CM015574.1_RaGOO	484000	43054107	0	0	0.0182	24	21	0.78	0.86	1.15
CM015574.1_RaGOO	485000	43054107	0	0	0.0000	22	23	0.71	0.93	0.96
CM015574.1_RaGOO	486000	43054107	0	0	0.0000	21	15	0.66	0.63	1.33
CM015574.1_RaGOO	487000	43054107	0	0	0.0000	31	19	1.00	0.78	1.62
CM015574.1_RaGOO	488000	43054107	0	0	0.0000	27	23	0.87	0.94	1.17
CM015574.1_RaGOO	489000	43054107	0	0	0.0000	27	23	0.86	0.92	1.19
CM015574.1_RaGOO	490000	43054107	0	0	0.0000	27	18	0.87	0.74	1.48
CM015574.1_RaGOO	491000	43054107	0	0	0.0000	25	16	0.81	0.65	1.57
CM015574.1_RaGOO	492000	43054107	0	0	0.0000	24	21	0.78	0.84	1.16
CM015574.1_RaGOO	493000	43054107	0	0	0.0457	25	17	0.80	0.71	1.42
CM015574.1_RaGOO	494000	43054107	0	0	0.0478	22	18	0.72	0.73	1.25
CM015574.1_RaGOO	495000	43054107	0	0	0.0000	19	24	0.61	0.99	0.78
CM015574.1_RaGOO	496000	43054107	0	0	0.0000	25	18	0.80	0.74	1.36
CM015574.1_RaGOO	497000	43054107	0	0	0.0000	24	21	0.77	0.85	1.15
CM015574.1_RaGOO	498000	43054107	0	0	0.0000	29	25	0.94	1.00	1.18
CM015574.1_RaGOO	499000	43054107	0	0	0.0332	33	26	1.07	1.07	1.26
CM015574.1_RaGOO	500000	43054107	0	0	0.0160	26	22	0.85	0.90	1.18
CM015574.1_RaGOO	501000	43054107	0	0	0.0000	24	20	0.77	0.83	1.18
CM015574.1_RaGOO	502000	43054107	1	0	0.0000	26	19	0.84	0.77	1.37
CM015574.1_RaGOO	503000	43054107	0	0	0.0000	19	21	0.63	0.87	0.91
CM015574.1_RaGOO	504000	43054107	0	0	0.0000	28	23	0.90	0.94	1.21
CM015574.1_RaGOO	505000	43054107	0	0	0.0000	26	18	0.85	0.74	1.46
CM015574.1_RaGOO	506000	43054107	0	0	0.0000	25	17	0.81	0.68	1.51
CM015574.1_RaGOO	507000	43054107	0	0	0.0000	30	23	0.95	0.94	1.28
CM015574.1_RaGOO	508000	43054107	0	0	0.0000	39	21	1.27	0.86	1.88
CM015574.1_RaGOO	509000	43054107	0	0	0.0000	32	23	1.02	0.93	1.39
CM015574.1_RaGOO	510000	43054107	0	0	0.0000	36	25	1.18	1.03	1.44
CM015574.1_RaGOO	511000	43054107	0	0	0.0000	27	24	0.86	0.99	1.09
CM015574.1_RaGOO	512000	43054107	0	0	0.0000	27	20	0.86	0.80	1.35
CM015574.1_RaGOO	513000	43054107	0	0	0.0165	19	16	0.62	0.67	1.18
CM015574.1_RaGOO	514000	43054107	0	0	0.0127	27	17	0.86	0.67	1.62
CM015574.1_RaGOO	515000	43054107	0	0	0.0000	21	20	0.68	0.82	1.03
CM015574.1_RaGOO	516000	43054107	0	0	0.0000	17	17	0.56	0.69	1.03
CM015574.1_RaGOO	517000	43054107	0	0	0.0000	21	21	0.67	0.86	0.98
CM015574.1_RaGOO	518000	43054107	0	0	0.0000	20	18	0.65	0.74	1.12
CM015574.1_RaGOO	519000	43054107	0	0	0.0322	16	14	0.52	0.55	1.20
CM015574.1_RaGOO	520000	43054107	0	0	0.0000	29	23	0.94	0.93	1.28
CM015574.1_RaGOO	521000	43054107	0	0	0.0000	30	21	0.96	0.86	1.40
CM015574.1_RaGOO	522000	43054107	0	0	0.0000	29	22	0.94	0.89	1.34
CM015574.1_RaGOO	523000	43054107	0	0	0.0000	28	18	0.91	0.74	1.55
CM015574.1_RaGOO	524000	43054107	1	0	0.0665	33	24	1.08	0.97	1.41
CM015574.1_RaGOO	525000	43054107	0	0	0.0000	28	23	0.90	0.94	1.22
CM015574.1_RaGOO	526000	43054107	0	0	0.0000	27	22	0.88	0.91	1.23
CM015574.1_RaGOO	527000	43054107	0	0	0.0000	29	26	0.93	1.06	1.10
CM015574.1_RaGOO	528000	43054107	0	0	0.0000	24	23	0.79	0.95	1.05
CM015574.1_RaGOO	529000	43054107	0	0	0.0000	22	24	0.72	0.96	0.94
CM015574.1_RaGOO	530000	43054107	0	0	0.0000	26	22	0.84	0.88	1.21
CM015574.1_RaGOO	531000	43054107	0	0	0.0000	26	17	0.83	0.70	1.48
CM015574.1_RaGOO	532000	43054107	0	0	0.0000	19	14	0.63	0.58	1.37
CM015574.1_RaGOO	533000	43054107	0	0	0.0000	26	21	0.84	0.86	1.23
CM015574.1_RaGOO	534000	43054107	0	0	0.0000	25	22	0.81	0.90	1.14
CM015574.1_RaGOO	535000	43054107	0	0	0.0000	22	21	0.70	0.85	1.04
CM015574.1_RaGOO	536000	43054107	0	0	0.1531	26	20	0.84	0.83	1.28
CM015574.1_RaGOO	537000	43054107	0	0	0.0000	28	22	0.91	0.90	1.27
CM015574.1_RaGOO	538000	43054107	0	0	0.0000	19	16	0.61	0.63	1.22
CM015574.1_RaGOO	539000	43054107	0	1	0.0000	18	16	0.58	0.66	1.10
CM015574.1_RaGOO	540000	43054107	0	0	0.0000	24	22	0.79	0.91	1.09
CM015574.1_RaGOO	541000	43054107	0	0	0.0000	22	22	0.73	0.88	1.04
CM015574.1_RaGOO	542000	43054107	0	0	0.0000	26	19	0.85	0.77	1.38
CM015574.1_RaGOO	543000	43054107	0	1	0.0000	25	22	0.80	0.88	1.14
CM015574.1_RaGOO	544000	43054107	0	0	0.0000	30	25	0.96	1.02	1.18
CM015574.1_RaGOO	545000	43054107	0	0	0.0000	25	14	0.80	0.58	1.73
CM015574.1_RaGOO	546000	43054107	0	0	0.0000	27	19	0.86	0.76	1.42
CM015574.1_RaGOO	547000	43054107	0	0	0.0000	15	16	0.49	0.66	0.93
CM015574.1_RaGOO	548000	43054107	0	0	0.0000	18	14	0.57	0.56	1.27
CM015574.1_RaGOO	549000	43054107	0	0	0.0000	24	20	0.76	0.83	1.16
CM015574.1_RaGOO	550000	43054107	0	0	0.0000	27	17	0.87	0.71	1.54
CM015574.1_RaGOO	551000	43054107	0	0	0.0000	27	21	0.87	0.86	1.27
CM015574.1_RaGOO	552000	43054107	0	0	0.0000	33	26	1.06	1.04	1.29
CM015574.1_RaGOO	553000	43054107	0	0	0.0000	31	27	0.99	1.11	1.12
CM015574.1_RaGOO	554000	43054107	0	0	0.0000	26	22	0.83	0.89	1.17
CM015574.1_RaGOO	555000	43054107	0	0	0.0000	28	25	0.90	1.01	1.13
CM015574.1_RaGOO	556000	43054107	0	0	0.0000	26	22	0.85	0.91	1.19
CM015574.1_RaGOO	557000	43054107	0	0	0.0000	31	21	1.00	0.86	1.46
CM015574.1_RaGOO	558000	43054107	0	0	0.0000	27	19	0.87	0.76	1.43
CM015574.1_RaGOO	559000	43054107	0	0	0.0000	28	23	0.91	0.94	1.21
CM015574.1_RaGOO	560000	43054107	0	0	0.0000	30	23	0.96	0.94	1.28
CM015574.1_RaGOO	561000	43054107	0	0	0.0000	23	19	0.73	0.77	1.20
CM015574.1_RaGOO	562000	43054107	0	0	0.0000	24	19	0.78	0.77	1.28
CM015574.1_RaGOO	563000	43054107	0	0	0.0000	29	22	0.92	0.90	1.29
CM015574.1_RaGOO	564000	43054107	0	0	0.0000	28	24	0.90	0.98	1.16
CM015574.1_RaGOO	565000	43054107	0	0	0.0000	29	21	0.93	0.85	1.37
CM015574.1_RaGOO	566000	43054107	0	0	0.0000	31	22	1.00	0.91	1.39
CM015574.1_RaGOO	567000	43054107	0	0	0.0000	44	32	1.40	1.29	1.38
CM015574.1_RaGOO	568000	43054107	0	0	0.0001	33	23	1.08	0.92	1.48
CM015574.1_RaGOO	569000	43054107	0	0	0.0000	30	22	0.98	0.88	1.39
CM015574.1_RaGOO	570000	43054107	0	0	0.0000	37	29	1.18	1.17	1.27
CM015574.1_RaGOO	571000	43054107	0	0	0.0000	29	22	0.94	0.91	1.30
CM015574.1_RaGOO	572000	43054107	0	0	0.1419	31	19	0.99	0.79	1.58
CM015574.1_RaGOO	573000	43054107	0	0	0.0620	26	18	0.85	0.73	1.46
CM015574.1_RaGOO	574000	43054107	0	0	0.0000	21	13	0.69	0.54	1.62
CM015574.1_RaGOO	575000	43054107	0	0	0.0000	21	20	0.67	0.80	1.05
CM015574.1_RaGOO	576000	43054107	0	0	0.0000	24	20	0.76	0.80	1.19
CM015574.1_RaGOO	577000	43054107	0	0	0.0000	26	17	0.84	0.71	1.49
CM015574.1_RaGOO	578000	43054107	0	0	0.0000	21	17	0.69	0.69	1.26
CM015574.1_RaGOO	579000	43054107	0	0	0.1742	28	22	0.90	0.89	1.28
CM015574.1_RaGOO	580000	43054107	0	0	0.0075	29	21	0.94	0.85	1.39
CM015574.1_RaGOO	581000	43054107	0	0	0.0000	31	22	0.99	0.87	1.42
CM015574.1_RaGOO	582000	43054107	0	0	0.0000	27	22	0.86	0.90	1.21
CM015574.1_RaGOO	583000	43054107	0	0	0.0000	43	34	1.38	1.37	1.27
CM015574.1_RaGOO	584000	43054107	0	0	0.0000	33	22	1.06	0.88	1.51
CM015574.1_RaGOO	585000	43054107	0	0	0.0000	23	21	0.75	0.86	1.11
CM015574.1_RaGOO	586000	43054107	0	0	0.0575	27	20	0.86	0.82	1.31
CM015574.1_RaGOO	587000	43054107	0	0	0.0000	31	24	1.01	0.98	1.29
CM015574.1_RaGOO	588000	43054107	0	0	0.0000	21	14	0.69	0.56	1.56
CM015574.1_RaGOO	589000	43054107	0	0	0.0000	29	21	0.94	0.87	1.37
CM015574.1_RaGOO	590000	43054107	0	0	0.0000	31	24	0.99	0.97	1.29
CM015574.1_RaGOO	591000	43054107	0	0	0.0000	28	24	0.90	0.97	1.17
CM015574.1_RaGOO	592000	43054107	0	0	0.0000	32	24	1.03	0.96	1.34
CM015574.1_RaGOO	593000	43054107	0	0	0.0000	32	24	1.02	0.97	1.34
CM015574.1_RaGOO	594000	43054107	0	0	0.0000	26	24	0.85	0.96	1.12
CM015574.1_RaGOO	595000	43054107	0	0	0.1136	30	30	0.97	1.22	1.01
CM015574.1_RaGOO	596000	43054107	0	0	0.0000	30	24	0.97	0.99	1.24
CM015574.1_RaGOO	597000	43054107	0	0	0.0831	31	23	1.00	0.93	1.35
CM015574.1_RaGOO	598000	43054107	0	0	0.0000	21	20	0.68	0.81	1.05
CM015574.1_RaGOO	599000	43054107	0	0	0.0718	23	21	0.74	0.83	1.12
CM015574.1_RaGOO	600000	43054107	0	0	0.0000	19	18	0.63	0.72	1.09
CM015574.1_RaGOO	601000	43054107	0	1	0.0000	27	21	0.87	0.86	1.28
CM015574.1_RaGOO	602000	43054107	0	0	0.0000	24	24	0.77	0.97	1.00
CM015574.1_RaGOO	603000	43054107	0	0	0.2697	22	19	0.71	0.76	1.17
CM015574.1_RaGOO	604000	43054107	0	0	0.1041	24	23	0.78	0.92	1.08
CM015574.1_RaGOO	605000	43054107	0	0	0.0000	29	19	0.92	0.78	1.48
CM015574.1_RaGOO	606000	43054107	0	0	0.0000	22	20	0.72	0.83	1.08
CM015574.1_RaGOO	607000	43054107	0	0	0.0000	29	20	0.92	0.80	1.45
CM015574.1_RaGOO	608000	43054107	0	0	0.0000	26	21	0.83	0.84	1.23
CM015574.1_RaGOO	609000	43054107	0	0	0.0000	28	21	0.91	0.84	1.36
CM015574.1_RaGOO	610000	43054107	0	0	0.0000	27	28	0.86	1.13	0.97
CM015574.1_RaGOO	611000	43054107	0	0	0.0000	26	21	0.85	0.84	1.27
CM015574.1_RaGOO	612000	43054107	0	0	0.0000	27	17	0.86	0.70	1.55
CM015574.1_RaGOO	613000	43054107	0	0	0.0239	29	21	0.94	0.86	1.37
CM015574.1_RaGOO	614000	43054107	1	0	0.0000	20	15	0.64	0.62	1.29
CM015574.1_RaGOO	615000	43054107	0	0	0.0000	30	20	0.96	0.80	1.52
CM015574.1_RaGOO	616000	43054107	0	0	0.0000	28	16	0.92	0.64	1.81
CM015574.1_RaGOO	617000	43054107	0	0	0.0000	25	16	0.79	0.66	1.52
CM015574.1_RaGOO	618000	43054107	0	0	0.0000	32	34	1.04	1.37	0.95
CM015574.1_RaGOO	619000	43054107	0	0	0.0000	25	20	0.80	0.81	1.25
CM015574.1_RaGOO	620000	43054107	0	0	0.0000	29	24	0.93	0.99	1.19
CM015574.1_RaGOO	621000	43054107	0	0	0.0000	32	26	1.03	1.05	1.25
CM015574.1_RaGOO	622000	43054107	0	0	0.0566	23	17	0.75	0.67	1.42
CM015574.1_RaGOO	623000	43054107	0	0	0.0000	29	21	0.93	0.86	1.36
CM015574.1_RaGOO	624000	43054107	0	0	0.0000	27	23	0.86	0.93	1.17
CM015574.1_RaGOO	625000	43054107	1	0	0.0000	28	24	0.91	0.96	1.19
CM015574.1_RaGOO	626000	43054107	0	0	0.0000	39	30	1.25	1.21	1.30
CM015574.1_RaGOO	627000	43054107	0	0	0.0000	32	25	1.02	1.00	1.28
CM015574.1_RaGOO	628000	43054107	0	0	0.0000	34	26	1.10	1.07	1.29
CM015574.1_RaGOO	629000	43054107	0	0	0.0000	28	22	0.90	0.89	1.28
CM015574.1_RaGOO	630000	43054107	0	0	0.0000	21	17	0.67	0.67	1.26
CM015574.1_RaGOO	631000	43054107	0	0	0.0000	18	18	0.58	0.73	1.01
CM015574.1_RaGOO	632000	43054107	0	0	0.0000	21	23	0.67	0.94	0.91
CM015574.1_RaGOO	633000	43054107	0	0	0.0000	24	27	0.77	1.09	0.89
CM015574.1_RaGOO	634000	43054107	0	0	0.0000	22	22	0.72	0.87	1.04
CM015574.1_RaGOO	635000	43054107	0	0	0.0000	32	25	1.02	1.02	1.26
CM015574.1_RaGOO	636000	43054107	0	0	0.0000	27	25	0.86	1.01	1.08
CM015574.1_RaGOO	637000	43054107	0	0	0.0000	22	20	0.72	0.82	1.10
CM015574.1_RaGOO	638000	43054107	0	0	0.0000	30	25	0.98	1.02	1.21
CM015574.1_RaGOO	639000	43054107	0	0	0.0000	34	21	1.08	0.87	1.57
CM015574.1_RaGOO	640000	43054107	0	0	0.0000	27	21	0.86	0.87	1.25
CM015574.1_RaGOO	641000	43054107	0	0	0.2347	50	42	1.61	1.69	1.21
CM015574.1_RaGOO	642000	43054107	0	0	0.0000	70	51	2.27	2.08	1.38
CM015574.1_RaGOO	643000	43054107	0	0	0.0000	21	21	0.69	0.87	1.00
CM015574.1_RaGOO	644000	43054107	0	0	0.0000	26	24	0.84	0.99	1.07
CM015574.1_RaGOO	645000	43054107	0	0	0.0000	30	18	0.95	0.73	1.64
CM015574.1_RaGOO	646000	43054107	0	0	0.0000	34	21	1.10	0.84	1.66
CM015574.1_RaGOO	647000	43054107	0	0	0.0000	25	22	0.80	0.88	1.15
CM015574.1_RaGOO	648000	43054107	0	0	0.0000	27	20	0.88	0.81	1.38
CM015574.1_RaGOO	649000	43054107	0	0	0.0000	30	22	0.98	0.88	1.41
CM015574.1_RaGOO	650000	43054107	0	0	0.0000	31	23	1.00	0.95	1.33
CM015574.1_RaGOO	651000	43054107	0	0	0.0007	20	19	0.65	0.79	1.03
CM015574.1_RaGOO	652000	43054107	0	0	0.0000	23	23	0.75	0.93	1.02
CM015574.1_RaGOO	653000	43054107	0	2	0.0000	16	19	0.50	0.79	0.81
CM015574.1_RaGOO	654000	43054107	0	0	0.0000	17	17	0.56	0.67	1.06
CM015574.1_RaGOO	655000	43054107	0	0	0.0000	24	21	0.78	0.84	1.16
CM015574.1_RaGOO	656000	43054107	0	0	0.0000	25	17	0.82	0.70	1.48
CM015574.1_RaGOO	657000	43054107	0	1	0.0000	24	18	0.79	0.72	1.39
CM015574.1_RaGOO	658000	43054107	0	0	0.0000	33	21	1.07	0.87	1.55
CM015574.1_RaGOO	659000	43054107	0	0	0.0000	30	21	0.96	0.87	1.39
CM015574.1_RaGOO	660000	43054107	0	0	0.0000	27	22	0.88	0.89	1.24
CM015574.1_RaGOO	661000	43054107	0	0	0.0000	26	20	0.83	0.81	1.29
CM015574.1_RaGOO	662000	43054107	0	0	0.0000	29	18	0.93	0.75	1.55
CM015574.1_RaGOO	663000	43054107	0	0	0.0000	24	19	0.79	0.79	1.25
CM015574.1_RaGOO	664000	43054107	0	0	0.0000	22	24	0.72	0.96	0.94
CM015574.1_RaGOO	665000	43054107	0	0	0.0000	27	22	0.88	0.87	1.26
CM015574.1_RaGOO	666000	43054107	0	0	0.0000	36	28	1.16	1.13	1.29
CM015574.1_RaGOO	667000	43054107	0	0	0.0000	26	22	0.85	0.89	1.21
CM015574.1_RaGOO	668000	43054107	0	0	0.0000	22	19	0.72	0.79	1.15
CM015574.1_RaGOO	669000	43054107	0	0	0.0000	19	19	0.62	0.78	1.00
CM015574.1_RaGOO	670000	43054107	0	0	0.0000	22	20	0.69	0.81	1.08
CM015574.1_RaGOO	671000	43054107	0	0	0.0000	21	20	0.69	0.80	1.08
CM015574.1_RaGOO	672000	43054107	0	0	0.0000	22	17	0.71	0.68	1.32
CM015574.1_RaGOO	673000	43054107	0	0	0.0000	27	22	0.87	0.90	1.21
CM015574.1_RaGOO	674000	43054107	0	0	0.0000	26	20	0.85	0.81	1.32
CM015574.1_RaGOO	675000	43054107	0	0	0.0000	29	27	0.92	1.08	1.07
CM015574.1_RaGOO	676000	43054107	0	0	0.0000	25	20	0.81	0.80	1.29
CM015574.1_RaGOO	677000	43054107	0	0	0.0000	31	19	1.01	0.76	1.67
CM015574.1_RaGOO	678000	43054107	0	0	0.0000	26	23	0.84	0.95	1.11
CM015574.1_RaGOO	679000	43054107	0	0	0.0000	25	21	0.81	0.85	1.20
CM015574.1_RaGOO	680000	43054107	0	0	0.0000	25	21	0.79	0.85	1.17
CM015574.1_RaGOO	681000	43054107	0	0	0.0000	31	23	1.00	0.94	1.34
CM015574.1_RaGOO	682000	43054107	0	0	0.0000	21	20	0.68	0.81	1.05
CM015574.1_RaGOO	683000	43054107	0	0	0.0000	22	19	0.71	0.79	1.14
CM015574.1_RaGOO	684000	43054107	0	0	0.0000	24	23	0.79	0.95	1.04
CM015574.1_RaGOO	685000	43054107	0	0	0.0000	22	17	0.71	0.68	1.31
CM015574.1_RaGOO	686000	43054107	1	0	0.0000	31	17	1.00	0.71	1.78
CM015574.1_RaGOO	687000	43054107	0	0	0.0692	30	23	0.97	0.93	1.31
CM015574.1_RaGOO	688000	43054107	0	0	0.0000	36	25	1.15	1.01	1.44
CM015574.1_RaGOO	689000	43054107	0	0	0.0000	29	25	0.95	1.03	1.15
CM015574.1_RaGOO	690000	43054107	0	0	0.0000	27	21	0.87	0.87	1.26
CM015574.1_RaGOO	691000	43054107	0	0	0.0463	23	20	0.74	0.79	1.17
CM015574.1_RaGOO	692000	43054107	0	0	0.0000	27	21	0.86	0.86	1.26
CM015574.1_RaGOO	693000	43054107	0	0	0.0000	33	26	1.07	1.04	1.30
CM015574.1_RaGOO	694000	43054107	0	0	0.0000	31	19	1.01	0.77	1.65
CM015574.1_RaGOO	695000	43054107	0	0	0.0000	34	16	1.10	0.65	2.13
CM015574.1_RaGOO	696000	43054107	0	0	0.0000	28	16	0.91	0.65	1.75
CM015574.1_RaGOO	697000	43054107	0	0	0.0000	24	24	0.76	0.97	0.99
CM015574.1_RaGOO	698000	43054107	0	0	0.0000	24	22	0.78	0.91	1.08
CM015574.1_RaGOO	699000	43054107	0	0	0.0000	27	23	0.87	0.93	1.18
CM015574.1_RaGOO	700000	43054107	0	0	0.0000	21	18	0.69	0.72	1.20
CM015574.1_RaGOO	701000	43054107	0	0	0.0000	20	17	0.66	0.71	1.17
CM015574.1_RaGOO	702000	43054107	0	0	0.0000	24	17	0.76	0.71	1.35
CM015574.1_RaGOO	703000	43054107	0	0	0.0000	28	22	0.90	0.91	1.25
CM015574.1_RaGOO	704000	43054107	0	0	0.0000	21	16	0.68	0.65	1.33
CM015574.1_RaGOO	705000	43054107	0	0	0.0000	22	17	0.70	0.67	1.31
CM015574.1_RaGOO	706000	43054107	0	0	0.0000	22	16	0.71	0.64	1.41
CM015574.1_RaGOO	707000	43054107	0	0	0.0000	29	22	0.92	0.89	1.30
CM015574.1_RaGOO	708000	43054107	0	0	0.0000	20	16	0.65	0.66	1.24
CM015574.1_RaGOO	709000	43054107	0	0	0.0000	27	16	0.86	0.66	1.63
CM015574.1_RaGOO	710000	43054107	0	0	0.0000	30	21	0.96	0.86	1.41
CM015574.1_RaGOO	711000	43054107	0	0	0.0000	23	17	0.76	0.69	1.38
CM015574.1_RaGOO	712000	43054107	1	0	0.0000	22	19	0.72	0.77	1.18
CM015574.1_RaGOO	713000	43054107	0	0	0.0000	29	18	0.95	0.74	1.62
CM015574.1_RaGOO	714000	43054107	0	0	0.0000	26	22	0.85	0.88	1.22
CM015574.1_RaGOO	715000	43054107	0	0	0.0000	31	25	1.00	1.01	1.25
CM015574.1_RaGOO	716000	43054107	0	0	0.0000	37	23	1.18	0.93	1.60
CM015574.1_RaGOO	717000	43054107	0	0	0.0000	32	31	1.04	1.27	1.03
CM015574.1_RaGOO	718000	43054107	0	0	0.0000	39	35	1.26	1.42	1.12
CM015574.1_RaGOO	719000	43054107	0	0	0.0000	37	28	1.21	1.14	1.33
CM015574.1_RaGOO	720000	43054107	0	0	0.0000	39	28	1.26	1.14	1.39
CM015574.1_RaGOO	721000	43054107	0	0	0.0000	33	29	1.06	1.16	1.15
CM015574.1_RaGOO	722000	43054107	0	0	0.0000	34	34	1.11	1.37	1.02
CM015574.1_RaGOO	723000	43054107	0	0	0.0000	33	26	1.08	1.04	1.30
CM015574.1_RaGOO	724000	43054107	0	0	0.0000	26	19	0.83	0.78	1.35
CM015574.1_RaGOO	725000	43054107	0	0	0.0000	28	20	0.89	0.79	1.41
CM015574.1_RaGOO	726000	43054107	0	0	0.0000	31	26	1.01	1.05	1.21
CM015574.1_RaGOO	727000	43054107	0	0	0.0000	28	27	0.91	1.10	1.05
CM015574.1_RaGOO	728000	43054107	0	0	0.0000	28	23	0.91	0.91	1.25
CM015574.1_RaGOO	729000	43054107	0	0	0.0000	29	24	0.93	0.97	1.20
CM015574.1_RaGOO	730000	43054107	0	0	0.0000	27	24	0.87	0.97	1.14
CM015574.1_RaGOO	731000	43054107	0	0	0.0000	24	25	0.79	1.00	0.99
CM015574.1_RaGOO	732000	43054107	0	0	0.0000	25	21	0.81	0.83	1.23
CM015574.1_RaGOO	733000	43054107	0	0	0.0000	21	20	0.69	0.80	1.09
CM015574.1_RaGOO	734000	43054107	0	0	0.0000	26	25	0.84	1.03	1.04
CM015574.1_RaGOO	735000	43054107	0	0	0.0000	28	27	0.90	1.11	1.03
CM015574.1_RaGOO	736000	43054107	0	0	0.0000	29	22	0.94	0.90	1.32
CM015574.1_RaGOO	737000	43054107	0	0	0.0000	25	23	0.81	0.93	1.11
CM015574.1_RaGOO	738000	43054107	0	0	0.0000	17	16	0.56	0.66	1.05
CM015574.1_RaGOO	739000	43054107	0	0	0.0000	24	19	0.78	0.78	1.26
CM015574.1_RaGOO	740000	43054107	0	0	0.0000	22	16	0.70	0.67	1.32
CM015574.1_RaGOO	741000	43054107	0	0	0.0000	25	22	0.80	0.89	1.13
CM015574.1_RaGOO	742000	43054107	0	0	0.0000	27	23	0.86	0.92	1.18
CM015574.1_RaGOO	743000	43054107	0	0	0.0000	32	20	1.03	0.81	1.59
CM015574.1_RaGOO	744000	43054107	0	0	0.0000	21	19	0.66	0.78	1.08
CM015574.1_RaGOO	745000	43054107	0	0	0.0000	33	24	1.07	0.98	1.37
CM015574.1_RaGOO	746000	43054107	0	0	0.0000	34	29	1.09	1.17	1.17
CM015574.1_RaGOO	747000	43054107	0	0	0.0000	26	17	0.84	0.69	1.52
CM015574.1_RaGOO	748000	43054107	0	0	0.0000	37	32	1.18	1.31	1.14
CM015574.1_RaGOO	749000	43054107	0	0	0.0000	33	25	1.07	1.02	1.33
CM015574.1_RaGOO	750000	43054107	0	0	0.0000	29	19	0.93	0.78	1.52
CM015574.1_RaGOO	751000	43054107	0	0	0.0000	24	20	0.77	0.81	1.18
CM015574.1_RaGOO	752000	43054107	0	0	0.0000	30	27	0.97	1.08	1.13
CM015574.1_RaGOO	753000	43054107	0	0	0.0000	37	31	1.20	1.26	1.20
CM015574.1_RaGOO	754000	43054107	0	0	0.0000	35	22	1.14	0.89	1.61
CM015574.1_RaGOO	755000	43054107	0	0	0.0000	33	24	1.08	0.97	1.39
CM015574.1_RaGOO	756000	43054107	0	0	0.0000	33	30	1.05	1.20	1.10
CM015574.1_RaGOO	757000	43054107	0	0	0.0000	36	26	1.18	1.06	1.39
CM015574.1_RaGOO	758000	43054107	0	0	0.0000	28	23	0.90	0.94	1.21
CM015574.1_RaGOO	759000	43054107	0	0	0.0000	25	21	0.81	0.85	1.21
CM015574.1_RaGOO	760000	43054107	0	0	0.0000	27	23	0.88	0.95	1.18
CM015574.1_RaGOO	761000	43054107	0	0	0.0000	24	21	0.77	0.86	1.12
CM015574.1_RaGOO	762000	43054107	0	0	0.0000	26	20	0.82	0.79	1.31
CM015574.1_RaGOO	763000	43054107	0	0	0.0000	24	17	0.78	0.70	1.40
CM015574.1_RaGOO	764000	43054107	0	0	0.0000	28	20	0.90	0.83	1.37
CM015574.1_RaGOO	765000	43054107	0	0	0.0000	26	20	0.84	0.81	1.30
CM015574.1_RaGOO	766000	43054107	0	0	0.0000	33	21	1.07	0.86	1.56
CM015574.1_RaGOO	767000	43054107	0	0	0.0000	30	28	0.98	1.14	1.08
CM015574.1_RaGOO	768000	43054107	0	0	0.0000	31	24	1.00	0.96	1.30
CM015574.1_RaGOO	769000	43054107	0	0	0.0000	31	23	0.99	0.94	1.32
CM015574.1_RaGOO	770000	43054107	0	0	0.0000	19	15	0.62	0.63	1.24
CM015574.1_RaGOO	771000	43054107	0	0	0.0000	27	25	0.86	1.01	1.07
CM015574.1_RaGOO	772000	43054107	0	0	0.0000	21	21	0.66	0.87	0.96
CM015574.1_RaGOO	773000	43054107	0	0	0.0000	28	24	0.89	0.97	1.16
CM015574.1_RaGOO	774000	43054107	0	1	0.0000	20	16	0.63	0.66	1.20
CM015574.1_RaGOO	775000	43054107	0	0	0.0000	31	17	1.00	0.70	1.80
CM015574.1_RaGOO	776000	43054107	0	0	0.0000	30	21	0.97	0.87	1.40
CM015574.1_RaGOO	777000	43054107	0	0	0.0000	23	18	0.73	0.74	1.23
CM015574.1_RaGOO	778000	43054107	0	0	0.0000	22	20	0.71	0.80	1.10
CM015574.1_RaGOO	779000	43054107	0	0	0.0000	30	24	0.97	0.97	1.26
CM015574.1_RaGOO	780000	43054107	0	0	0.0480	29	28	0.93	1.13	1.04
CM015574.1_RaGOO	781000	43054107	0	0	0.0000	33	26	1.08	1.05	1.30
CM015574.1_RaGOO	782000	43054107	0	0	0.0000	33	23	1.07	0.93	1.44
CM015574.1_RaGOO	783000	43054107	0	0	0.0000	39	22	1.26	0.91	1.74
CM015574.1_RaGOO	784000	43054107	0	0	0.0000	40	27	1.29	1.10	1.48
CM015574.1_RaGOO	785000	43054107	0	0	0.0000	34	27	1.09	1.09	1.26
CM015574.1_RaGOO	786000	43054107	0	0	0.0000	32	23	1.03	0.94	1.38
CM015574.1_RaGOO	787000	43054107	0	0	0.0000	40	28	1.30	1.13	1.45
CM015574.1_RaGOO	788000	43054107	0	0	0.0000	32	24	1.04	0.97	1.35
CM015574.1_RaGOO	789000	43054107	0	0	0.0000	24	17	0.77	0.69	1.41
CM015574.1_RaGOO	790000	43054107	0	0	0.0000	18	18	0.59	0.73	1.02
CM015574.1_RaGOO	791000	43054107	0	0	0.0000	27	23	0.86	0.91	1.19
CM015574.1_RaGOO	792000	43054107	0	0	0.0000	28	21	0.91	0.85	1.35
CM015574.1_RaGOO	793000	43054107	0	0	0.0000	23	22	0.75	0.90	1.05
CM015574.1_RaGOO	794000	43054107	0	0	0.0000	19	20	0.62	0.82	0.94
CM015574.1_RaGOO	795000	43054107	0	0	0.0000	27	22	0.87	0.90	1.22
CM015574.1_RaGOO	796000	43054107	1	0	0.0000	17	14	0.56	0.56	1.26
CM015574.1_RaGOO	797000	43054107	0	0	0.0000	33	21	1.07	0.84	1.60
CM015574.1_RaGOO	798000	43054107	0	0	0.0000	28	26	0.91	1.04	1.10
CM015574.1_RaGOO	799000	43054107	0	0	0.0000	30	23	0.98	0.94	1.32
CM015574.1_RaGOO	800000	43054107	0	0	0.0000	25	23	0.82	0.93	1.11
CM015574.1_RaGOO	801000	43054107	0	0	0.0000	30	24	0.97	0.99	1.22
CM015574.1_RaGOO	802000	43054107	0	0	0.0000	30	26	0.96	1.08	1.12
CM015574.1_RaGOO	803000	43054107	0	0	0.0000	33	24	1.08	0.96	1.42
CM015574.1_RaGOO	804000	43054107	0	0	0.0000	36	27	1.15	1.08	1.34
CM015574.1_RaGOO	805000	43054107	0	0	0.0000	38	30	1.21	1.22	1.26
CM015574.1_RaGOO	806000	43054107	0	0	0.0000	25	22	0.81	0.88	1.17
CM015574.1_RaGOO	807000	43054107	0	0	0.0000	28	24	0.90	0.96	1.18
CM015574.1_RaGOO	808000	43054107	0	4	0.0076	28	28	0.89	1.14	0.99
CM015574.1_RaGOO	809000	43054107	0	0	0.0000	48	39	1.53	1.57	1.23
CM015574.1_RaGOO	810000	43054107	0	0	0.0000	25	18	0.81	0.72	1.42
CM015574.1_RaGOO	811000	43054107	0	0	0.0000	29	25	0.95	1.01	1.18
CM015574.1_RaGOO	812000	43054107	0	0	0.0000	26	22	0.85	0.90	1.18
CM015574.1_RaGOO	813000	43054107	0	0	0.0000	31	25	1.00	1.02	1.23
CM015574.1_RaGOO	814000	43054107	0	0	0.0000	32	30	1.02	1.22	1.06
CM015574.1_RaGOO	815000	43054107	0	0	0.0000	23	17	0.75	0.68	1.39
CM015574.1_RaGOO	816000	43054107	1	0	0.0000	22	21	0.71	0.86	1.05
CM015574.1_RaGOO	817000	43054107	0	0	0.0131	27	23	0.86	0.93	1.17
CM015574.1_RaGOO	818000	43054107	0	0	0.0000	29	24	0.93	0.96	1.22
CM015574.1_RaGOO	819000	43054107	0	0	0.0000	29	22	0.95	0.90	1.33
CM015574.1_RaGOO	820000	43054107	0	0	0.0000	31	28	0.99	1.15	1.08
CM015574.1_RaGOO	821000	43054107	0	0	0.0000	31	24	1.00	0.97	1.29
CM015574.1_RaGOO	822000	43054107	0	0	0.0000	30	20	0.98	0.83	1.49
CM015574.1_RaGOO	823000	43054107	0	0	0.0000	31	22	1.00	0.89	1.42
CM015574.1_RaGOO	824000	43054107	0	0	0.0000	33	22	1.05	0.87	1.52
CM015574.1_RaGOO	825000	43054107	0	0	0.0000	22	21	0.71	0.84	1.07
CM015574.1_RaGOO	826000	43054107	0	0	0.0000	21	17	0.68	0.71	1.21
CM015574.1_RaGOO	827000	43054107	0	0	0.0000	24	20	0.77	0.82	1.19
CM015574.1_RaGOO	828000	43054107	0	0	0.0000	26	19	0.85	0.78	1.38
CM015574.1_RaGOO	829000	43054107	0	0	0.0000	26	18	0.83	0.75	1.39
CM015574.1_RaGOO	830000	43054107	0	0	0.0000	23	16	0.76	0.66	1.45
CM015574.1_RaGOO	831000	43054107	0	0	0.0000	20	15	0.65	0.60	1.36
CM015574.1_RaGOO	832000	43054107	0	0	0.0000	26	19	0.83	0.78	1.33
CM015574.1_RaGOO	833000	43054107	0	0	0.0000	26	22	0.84	0.91	1.17
CM015574.1_RaGOO	834000	43054107	0	0	0.0000	32	23	1.03	0.93	1.40
CM015574.1_RaGOO	835000	43054107	0	0	0.0000	27	23	0.87	0.92	1.20
CM015574.1_RaGOO	836000	43054107	0	0	0.0000	24	17	0.77	0.70	1.39
CM015574.1_RaGOO	837000	43054107	0	0	0.0000	26	20	0.84	0.81	1.31
CM015574.1_RaGOO	838000	43054107	0	0	0.0000	24	17	0.77	0.69	1.40
CM015574.1_RaGOO	839000	43054107	0	0	0.0000	25	16	0.79	0.65	1.54
CM015574.1_RaGOO	840000	43054107	0	0	0.0000	24	26	0.77	1.04	0.93
CM015574.1_RaGOO	841000	43054107	0	0	0.0000	28	24	0.90	0.96	1.18
CM015574.1_RaGOO	842000	43054107	0	0	0.0000	31	25	1.01	1.03	1.23
CM015574.1_RaGOO	843000	43054107	0	0	0.0000	30	25	0.96	1.03	1.17
CM015574.1_RaGOO	844000	43054107	0	0	0.0000	30	18	0.96	0.72	1.69
CM015574.1_RaGOO	845000	43054107	0	0	0.0000	25	19	0.81	0.78	1.31
CM015574.1_RaGOO	846000	43054107	0	0	0.0000	24	18	0.77	0.73	1.33
CM015574.1_RaGOO	847000	43054107	0	0	0.0000	29	25	0.94	1.00	1.19
CM015574.1_RaGOO	848000	43054107	0	0	0.0000	42	33	1.34	1.33	1.28
CM015574.1_RaGOO	849000	43054107	0	0	0.0000	26	21	0.83	0.87	1.21
CM015574.1_RaGOO	850000	43054107	0	0	0.0000	34	25	1.08	1.01	1.35
CM015574.1_RaGOO	851000	43054107	0	0	0.0000	25	21	0.80	0.83	1.21
CM015574.1_RaGOO	852000	43054107	0	0	0.0000	21	16	0.68	0.64	1.35
CM015574.1_RaGOO	853000	43054107	0	0	0.0000	34	23	1.11	0.95	1.47
CM015574.1_RaGOO	854000	43054107	0	0	0.0000	43	32	1.39	1.31	1.34
CM015574.1_RaGOO	855000	43054107	0	0	0.0000	24	17	0.76	0.68	1.41
CM015574.1_RaGOO	856000	43054107	0	0	0.0000	26	20	0.83	0.82	1.27
CM015574.1_RaGOO	857000	43054107	0	0	0.0000	28	20	0.89	0.80	1.41
CM015574.1_RaGOO	858000	43054107	0	0	0.0000	23	20	0.73	0.83	1.11
CM015574.1_RaGOO	859000	43054107	0	0	0.0006	44	34	1.42	1.38	1.30
CM015574.1_RaGOO	860000	43054107	0	0	0.0000	29	23	0.92	0.94	1.24
CM015574.1_RaGOO	861000	43054107	0	0	0.0000	38	23	1.23	0.92	1.68
CM015574.1_RaGOO	862000	43054107	0	0	0.0000	38	23	1.22	0.94	1.64
CM015574.1_RaGOO	863000	43054107	0	0	0.0000	28	21	0.92	0.86	1.35
CM015574.1_RaGOO	864000	43054107	0	0	0.0000	30	26	0.98	1.07	1.15
CM015574.1_RaGOO	865000	43054107	0	0	0.0000	25	14	0.80	0.58	1.73
CM015574.1_RaGOO	866000	43054107	0	0	0.0000	24	17	0.78	0.69	1.41
CM015574.1_RaGOO	867000	43054107	0	0	0.0000	28	18	0.91	0.74	1.55
CM015574.1_RaGOO	868000	43054107	0	0	0.0000	28	22	0.91	0.91	1.27
CM015574.1_RaGOO	869000	43054107	0	0	0.0000	26	16	0.83	0.63	1.64
CM015574.1_RaGOO	870000	43054107	0	0	0.0000	35	25	1.12	1.03	1.37
CM015574.1_RaGOO	871000	43054107	0	0	0.0000	30	25	0.97	1.04	1.18
CM015574.1_RaGOO	872000	43054107	0	0	0.0000	27	25	0.86	1.02	1.07
CM015574.1_RaGOO	873000	43054107	0	0	0.0000	22	24	0.72	0.96	0.94
CM015574.1_RaGOO	874000	43054107	0	0	0.0000	26	18	0.83	0.73	1.44
CM015574.1_RaGOO	875000	43054107	0	0	0.0000	29	21	0.94	0.84	1.42
CM015574.1_RaGOO	876000	43054107	0	0	0.0000	24	23	0.78	0.91	1.08
CM015574.1_RaGOO	877000	43054107	0	0	0.0000	22	21	0.70	0.86	1.03
CM015574.1_RaGOO	878000	43054107	0	0	0.0004	41	34	1.33	1.38	1.21
CM015574.1_RaGOO	879000	43054107	0	0	0.0000	23	21	0.75	0.84	1.14
CM015574.1_RaGOO	880000	43054107	0	0	0.0000	23	14	0.75	0.55	1.71
CM015574.1_RaGOO	881000	43054107	0	0	0.0000	32	27	1.03	1.10	1.18
CM015574.1_RaGOO	882000	43054107	0	0	0.0000	38	28	1.23	1.13	1.37
CM015574.1_RaGOO	883000	43054107	0	0	0.0000	42	34	1.34	1.37	1.24
CM015574.1_RaGOO	884000	43054107	0	0	0.0000	33	26	1.06	1.04	1.29
CM015574.1_RaGOO	885000	43054107	0	0	0.0000	30	23	0.96	0.95	1.28
CM015574.1_RaGOO	886000	43054107	0	0	0.0000	29	19	0.94	0.79	1.50
CM015574.1_RaGOO	887000	43054107	0	0	0.0000	16	16	0.51	0.64	1.00
CM015574.1_RaGOO	888000	43054107	0	0	0.0000	20	19	0.65	0.77	1.07
CM015574.1_RaGOO	889000	43054107	0	0	0.0000	21	17	0.67	0.70	1.20
CM015574.1_RaGOO	890000	43054107	0	0	0.0000	20	16	0.66	0.65	1.28
CM015574.1_RaGOO	891000	43054107	0	0	0.0000	20	18	0.66	0.73	1.14
CM015574.1_RaGOO	892000	43054107	0	0	0.0000	21	18	0.68	0.74	1.16
CM015574.1_RaGOO	893000	43054107	0	0	0.0000	27	23	0.86	0.92	1.17
CM015574.1_RaGOO	894000	43054107	0	0	0.0000	19	16	0.61	0.66	1.16
CM015574.1_RaGOO	895000	43054107	0	0	0.0000	33	31	1.05	1.28	1.04
CM015574.1_RaGOO	896000	43054107	0	0	0.0000	33	22	1.08	0.91	1.49
CM015574.1_RaGOO	897000	43054107	0	0	0.0000	22	18	0.70	0.72	1.23
CM015574.1_RaGOO	898000	43054107	0	0	0.0000	23	19	0.76	0.77	1.23
CM015574.1_RaGOO	899000	43054107	0	0	0.0000	32	22	1.03	0.91	1.42
CM015574.1_RaGOO	900000	43054107	0	0	0.0000	29	22	0.93	0.89	1.32
CM015574.1_RaGOO	901000	43054107	0	0	0.0000	26	23	0.83	0.95	1.11
CM015574.1_RaGOO	902000	43054107	0	0	0.0000	33	23	1.07	0.94	1.44
CM015574.1_RaGOO	903000	43054107	0	0	0.0000	32	22	1.02	0.91	1.42
CM015574.1_RaGOO	904000	43054107	0	0	0.0000	19	17	0.62	0.67	1.17
CM015574.1_RaGOO	905000	43054107	0	0	0.0000	25	19	0.82	0.78	1.31
CM015574.1_RaGOO	906000	43054107	0	0	0.0000	19	17	0.62	0.69	1.13
CM015574.1_RaGOO	907000	43054107	0	0	0.0000	25	19	0.79	0.79	1.27
CM015574.1_RaGOO	908000	43054107	0	0	0.0000	20	15	0.63	0.59	1.34
CM015574.1_RaGOO	909000	43054107	0	0	0.0000	14	16	0.46	0.65	0.89
CM015574.1_RaGOO	910000	43054107	0	0	0.0000	24	23	0.77	0.92	1.06
CM015574.1_RaGOO	911000	43054107	0	0	0.0000	27	20	0.89	0.82	1.35
CM015574.1_RaGOO	912000	43054107	0	0	0.0000	34	25	1.09	1.03	1.33
CM015574.1_RaGOO	913000	43054107	0	0	0.0000	30	24	0.96	0.96	1.26
CM015574.1_RaGOO	914000	43054107	0	0	0.0000	24	23	0.76	0.92	1.04
CM015574.1_RaGOO	915000	43054107	0	0	0.0000	24	15	0.78	0.60	1.62
CM015574.1_RaGOO	916000	43054107	0	0	0.0000	24	18	0.79	0.72	1.37
CM015574.1_RaGOO	917000	43054107	0	0	0.0000	31	21	1.01	0.85	1.49
CM015574.1_RaGOO	918000	43054107	0	0	0.0000	34	19	1.10	0.77	1.79
CM015574.1_RaGOO	919000	43054107	0	0	0.0000	29	19	0.95	0.78	1.52
CM015574.1_RaGOO	920000	43054107	0	0	0.0000	28	18	0.89	0.74	1.51
CM015574.1_RaGOO	921000	43054107	0	0	0.1792	30	25	0.96	1.00	1.21
CM015574.1_RaGOO	922000	43054107	0	0	0.0000	25	18	0.80	0.74	1.36
CM015574.1_RaGOO	923000	43054107	0	0	0.0000	32	21	1.02	0.86	1.49
CM015574.1_RaGOO	924000	43054107	0	0	0.0000	31	26	1.01	1.07	1.18
CM015574.1_RaGOO	925000	43054107	0	0	0.0000	34	21	1.10	0.86	1.63
CM015574.1_RaGOO	926000	43054107	0	0	0.0000	22	17	0.72	0.69	1.32
CM015574.1_RaGOO	927000	43054107	0	0	0.0000	33	19	1.06	0.79	1.69
CM015574.1_RaGOO	928000	43054107	0	0	0.0000	21	20	0.66	0.83	1.01
CM015574.1_RaGOO	929000	43054107	0	0	0.0000	24	19	0.78	0.78	1.25
CM015574.1_RaGOO	930000	43054107	0	0	0.0000	30	21	0.97	0.87	1.41
CM015574.1_RaGOO	931000	43054107	0	0	0.0000	26	23	0.84	0.94	1.13
CM015574.1_RaGOO	932000	43054107	1	0	0.0000	24	21	0.77	0.86	1.13
CM015574.1_RaGOO	933000	43054107	0	0	0.0000	26	23	0.83	0.95	1.10
CM015574.1_RaGOO	934000	43054107	0	0	0.0000	24	19	0.76	0.76	1.27
CM015574.1_RaGOO	935000	43054107	0	0	0.0000	21	19	0.68	0.76	1.12
CM015574.1_RaGOO	936000	43054107	0	0	0.0000	28	26	0.91	1.04	1.10
CM015574.1_RaGOO	937000	43054107	0	0	0.0000	28	25	0.91	1.01	1.13
CM015574.1_RaGOO	938000	43054107	0	0	0.0000	29	23	0.94	0.95	1.25
CM015574.1_RaGOO	939000	43054107	0	0	0.0000	29	22	0.94	0.89	1.33
CM015574.1_RaGOO	940000	43054107	0	0	0.0000	27	20	0.87	0.82	1.34
CM015574.1_RaGOO	941000	43054107	0	0	0.0000	38	29	1.23	1.17	1.33
CM015574.1_RaGOO	942000	43054107	0	0	0.0000	21	23	0.66	0.94	0.89
CM015574.1_RaGOO	943000	43054107	0	0	0.0000	23	19	0.75	0.78	1.21
CM015574.1_RaGOO	944000	43054107	0	0	0.0000	24	22	0.79	0.90	1.11
CM015574.1_RaGOO	945000	43054107	0	0	0.0000	34	21	1.09	0.86	1.60
CM015574.1_RaGOO	946000	43054107	0	0	0.0000	27	21	0.88	0.87	1.27
CM015574.1_RaGOO	947000	43054107	0	0	0.0000	37	26	1.20	1.05	1.45
CM015574.1_RaGOO	948000	43054107	0	0	0.0000	27	25	0.86	1.00	1.08
CM015574.1_RaGOO	949000	43054107	0	0	0.0000	25	17	0.81	0.69	1.48
CM015574.1_RaGOO	950000	43054107	0	0	0.0000	22	22	0.72	0.90	1.00
CM015574.1_RaGOO	951000	43054107	0	0	0.0000	19	25	0.62	1.03	0.75
CM015574.1_RaGOO	952000	43054107	0	0	0.0000	28	17	0.89	0.69	1.63
CM015574.1_RaGOO	953000	43054107	0	0	0.0000	27	22	0.86	0.88	1.24
CM015574.1_RaGOO	954000	43054107	0	0	0.0000	23	17	0.76	0.69	1.38
CM015574.1_RaGOO	955000	43054107	0	0	0.0000	25	20	0.80	0.81	1.25
CM015574.1_RaGOO	956000	43054107	0	0	0.0000	33	22	1.06	0.90	1.48
CM015574.1_RaGOO	957000	43054107	0	0	0.0000	32	24	1.03	0.99	1.31
CM015574.1_RaGOO	958000	43054107	0	0	0.0000	34	21	1.11	0.84	1.67
CM015574.1_RaGOO	959000	43054107	0	0	0.0000	31	22	1.01	0.90	1.41
CM015574.1_RaGOO	960000	43054107	0	0	0.0000	27	22	0.89	0.88	1.27
CM015574.1_RaGOO	961000	43054107	0	0	0.0000	27	23	0.88	0.94	1.19
CM015574.1_RaGOO	962000	43054107	0	0	0.0000	24	18	0.77	0.74	1.30
CM015574.1_RaGOO	963000	43054107	0	0	0.0000	32	24	1.03	0.96	1.34
CM015574.1_RaGOO	964000	43054107	0	0	0.0000	35	25	1.12	1.03	1.37
CM015574.1_RaGOO	965000	43054107	0	0	0.0000	26	24	0.83	0.96	1.09
CM015574.1_RaGOO	966000	43054107	0	0	0.0000	27	21	0.88	0.87	1.28
CM015574.1_RaGOO	967000	43054107	0	0	0.0000	28	21	0.91	0.87	1.32
CM015574.1_RaGOO	968000	43054107	0	0	0.0000	20	21	0.65	0.87	0.93
CM015574.1_RaGOO	969000	43054107	0	0	0.0000	23	22	0.74	0.89	1.05
CM015574.1_RaGOO	970000	43054107	0	0	0.0000	31	25	1.00	1.00	1.26
CM015574.1_RaGOO	971000	43054107	0	0	0.0000	24	20	0.77	0.83	1.17
CM015574.1_RaGOO	972000	43054107	0	0	0.0000	28	19	0.91	0.78	1.47
CM015574.1_RaGOO	973000	43054107	0	0	0.0000	27	20	0.86	0.81	1.33
CM015574.1_RaGOO	974000	43054107	0	0	0.0000	19	15	0.62	0.63	1.26
CM015574.1_RaGOO	975000	43054107	0	0	0.0000	27	27	0.86	1.08	1.00
CM015574.1_RaGOO	976000	43054107	0	1	0.0000	31	26	1.00	1.07	1.17
CM015574.1_RaGOO	977000	43054107	0	0	0.0000	30	24	0.98	0.99	1.25
CM015574.1_RaGOO	978000	43054107	1	0	0.0000	18	15	0.58	0.60	1.22
CM015574.1_RaGOO	979000	43054107	0	0	0.0000	24	19	0.78	0.77	1.28
CM015574.1_RaGOO	980000	43054107	0	0	0.0000	25	26	0.80	1.06	0.94
CM015574.1_RaGOO	981000	43054107	0	0	0.0000	24	23	0.77	0.93	1.05
CM015574.1_RaGOO	982000	43054107	0	0	0.0000	25	22	0.81	0.88	1.17
CM015574.1_RaGOO	983000	43054107	0	0	0.0000	28	22	0.90	0.90	1.27
CM015574.1_RaGOO	984000	43054107	0	0	0.0000	28	23	0.89	0.93	1.21
CM015574.1_RaGOO	985000	43054107	0	0	0.0000	33	19	1.07	0.76	1.78
CM015574.1_RaGOO	986000	43054107	0	0	0.0000	26	23	0.84	0.93	1.14
CM015574.1_RaGOO	987000	43054107	1	0	0.0000	21	19	0.68	0.78	1.10
CM015574.1_RaGOO	988000	43054107	0	0	0.0000	31	26	1.01	1.06	1.20
CM015574.1_RaGOO	989000	43054107	0	0	0.0000	24	19	0.79	0.77	1.28
CM015574.1_RaGOO	990000	43054107	0	0	0.0000	28	28	0.90	1.12	1.01
CM015574.1_RaGOO	991000	43054107	0	0	0.0000	24	18	0.78	0.72	1.38
CM015574.1_RaGOO	992000	43054107	0	0	0.0000	37	29	1.18	1.17	1.28
CM015574.1_RaGOO	993000	43054107	0	0	0.0000	31	18	0.99	0.75	1.67
CM015574.1_RaGOO	994000	43054107	0	0	0.0000	21	17	0.68	0.67	1.28
CM015574.1_RaGOO	995000	43054107	0	0	0.0000	28	22	0.90	0.88	1.29
CM015574.1_RaGOO	996000	43054107	0	0	0.0000	42	33	1.35	1.33	1.28
CM015574.1_RaGOO	997000	43054107	0	0	0.0085	35	28	1.13	1.16	1.23
CM015574.1_RaGOO	998000	43054107	0	0	0.0000	28	23	0.89	0.92	1.23
CM015574.1_RaGOO	999000	43054107	0	1	0.0000	26	23	0.84	0.94	1.14
CM015574.1_RaGOO	1000000	43054107	0	0	0.0000	25	18	0.79	0.72	1.39
CM015574.1_RaGOO	1001000	43054107	0	0	0.0000	22	23	0.69	0.94	0.93
CM015574.1_RaGOO	1002000	43054107	0	0	0.0000	24	19	0.79	0.77	1.29
CM015574.1_RaGOO	1003000	43054107	0	0	0.0000	53	40	1.70	1.62	1.33
CM015574.1_RaGOO	1004000	43054107	0	0	0.0117	21	19	0.69	0.76	1.14
CM015574.1_RaGOO	1005000	43054107	0	0	0.0000	14	15	0.45	0.59	0.96
CM015574.1_RaGOO	1006000	43054107	0	0	0.0000	15	17	0.49	0.67	0.91
CM015574.1_RaGOO	1007000	43054107	0	0	0.0000	18	15	0.58	0.60	1.21
CM015574.1_RaGOO	1008000	43054107	0	0	0.0000	20	15	0.63	0.61	1.30
CM015574.1_RaGOO	1009000	43054107	0	0	0.0000	29	21	0.93	0.87	1.34
CM015574.1_RaGOO	1010000	43054107	0	0	0.0000	30	22	0.96	0.88	1.36
CM015574.1_RaGOO	1011000	43054107	0	0	0.0000	30	23	0.98	0.94	1.31
CM015574.1_RaGOO	1012000	43054107	0	0	0.0000	34	21	1.10	0.87	1.59
CM015574.1_RaGOO	1013000	43054107	0	0	0.0000	35	34	1.12	1.36	1.04
CM015574.1_RaGOO	1014000	43054107	0	0	0.0000	32	25	1.03	1.01	1.28
CM015574.1_RaGOO	1015000	43054107	0	0	0.0000	29	24	0.92	0.96	1.20
CM015574.1_RaGOO	1016000	43054107	0	0	0.0000	32	23	1.04	0.94	1.39
CM015574.1_RaGOO	1017000	43054107	0	0	0.0000	26	24	0.83	0.98	1.07
CM015574.1_RaGOO	1018000	43054107	0	0	0.0000	23	21	0.76	0.86	1.11
CM015574.1_RaGOO	1019000	43054107	0	0	0.0000	22	19	0.73	0.76	1.20
CM015574.1_RaGOO	1020000	43054107	0	0	0.0000	24	15	0.76	0.62	1.54
CM015574.1_RaGOO	1021000	43054107	0	0	0.0000	26	19	0.85	0.78	1.36
CM015574.1_RaGOO	1022000	43054107	0	0	0.0000	26	22	0.84	0.90	1.18
CM015574.1_RaGOO	1023000	43054107	0	0	0.0000	21	23	0.69	0.94	0.92
CM015574.1_RaGOO	1024000	43054107	0	0	0.0000	23	21	0.75	0.86	1.10
CM015574.1_RaGOO	1025000	43054107	0	0	0.0000	28	21	0.92	0.86	1.34
CM015574.1_RaGOO	1026000	43054107	0	0	0.0000	28	23	0.91	0.92	1.25
CM015574.1_RaGOO	1027000	43054107	0	0	0.0000	33	24	1.07	0.98	1.37
CM015574.1_RaGOO	1028000	43054107	0	0	0.0000	36	28	1.16	1.16	1.26
CM015574.1_RaGOO	1029000	43054107	0	0	0.0000	23	24	0.75	0.96	0.99
CM015574.1_RaGOO	1030000	43054107	0	0	0.0000	21	18	0.67	0.74	1.14
CM015574.1_RaGOO	1031000	43054107	0	0	0.0000	23	18	0.75	0.71	1.32
CM015574.1_RaGOO	1032000	43054107	0	0	0.0000	24	25	0.77	1.03	0.94
CM015574.1_RaGOO	1033000	43054107	0	0	0.0000	25	18	0.79	0.71	1.40
CM015574.1_RaGOO	1034000	43054107	0	0	0.0000	24	22	0.77	0.88	1.11
CM015574.1_RaGOO	1035000	43054107	0	0	0.0000	32	25	1.02	1.00	1.29
CM015574.1_RaGOO	1036000	43054107	0	0	0.0000	36	28	1.16	1.12	1.31
CM015574.1_RaGOO	1037000	43054107	0	0	0.0000	33	24	1.07	0.98	1.39
CM015574.1_RaGOO	1038000	43054107	0	0	0.0000	31	22	1.00	0.88	1.42
CM015574.1_RaGOO	1039000	43054107	0	0	0.0084	32	20	1.03	0.80	1.62
CM015574.1_RaGOO	1040000	43054107	0	0	0.0000	25	24	0.81	0.97	1.06
CM015574.1_RaGOO	1041000	43054107	0	0	0.0000	30	16	0.96	0.65	1.88
CM015574.1_RaGOO	1042000	43054107	0	0	0.0000	39	20	1.27	0.81	1.96
CM015574.1_RaGOO	1043000	43054107	0	0	0.0000	29	22	0.93	0.91	1.29
CM015574.1_RaGOO	1044000	43054107	0	0	0.0000	26	22	0.84	0.90	1.18
CM015574.1_RaGOO	1045000	43054107	0	0	0.0000	27	20	0.87	0.80	1.37
CM015574.1_RaGOO	1046000	43054107	0	0	0.0000	32	28	1.03	1.12	1.16
CM015574.1_RaGOO	1047000	43054107	0	0	0.0168	30	30	0.96	1.21	0.99
CM015574.1_RaGOO	1048000	43054107	3	0	0.0000	33	18	1.07	0.74	1.82
CM015574.1_RaGOO	1049000	43054107	0	0	0.0000	34	27	1.08	1.09	1.25
CM015574.1_RaGOO	1050000	43054107	0	0	0.0000	25	23	0.80	0.94	1.07
CM015574.1_RaGOO	1051000	43054107	0	0	0.0000	25	26	0.81	1.04	0.98
CM015574.1_RaGOO	1052000	43054107	0	0	0.0000	30	20	0.96	0.80	1.50
CM015574.1_RaGOO	1053000	43054107	0	0	0.0000	31	22	1.01	0.90	1.42
CM015574.1_RaGOO	1054000	43054107	0	0	0.0000	20	18	0.66	0.74	1.12
CM015574.1_RaGOO	1055000	43054107	0	0	0.0000	22	18	0.72	0.74	1.23
CM015574.1_RaGOO	1056000	43054107	0	0	0.0000	25	22	0.81	0.88	1.15
CM015574.1_RaGOO	1057000	43054107	0	0	0.0000	29	20	0.93	0.80	1.48
CM015574.1_RaGOO	1058000	43054107	0	0	0.0000	25	19	0.81	0.77	1.32
CM015574.1_RaGOO	1059000	43054107	0	0	0.0000	23	21	0.73	0.85	1.08
CM015574.1_RaGOO	1060000	43054107	0	0	0.0482	22	14	0.70	0.55	1.59
CM015574.1_RaGOO	1061000	43054107	0	0	0.0000	23	24	0.73	0.99	0.92
CM015574.1_RaGOO	1062000	43054107	0	0	0.0097	17	17	0.56	0.69	1.03
CM015574.1_RaGOO	1063000	43054107	0	0	0.0557	18	19	0.60	0.75	0.99
CM015574.1_RaGOO	1064000	43054107	0	0	0.0000	48	40	1.53	1.62	1.19
CM015574.1_RaGOO	1065000	43054107	0	0	0.0157	15	20	0.50	0.83	0.75
CM015574.1_RaGOO	1066000	43054107	0	0	0.0000	20	17	0.66	0.68	1.21
CM015574.1_RaGOO	1067000	43054107	0	0	0.0000	23	16	0.74	0.64	1.47
CM015574.1_RaGOO	1068000	43054107	0	0	0.0000	23	16	0.73	0.65	1.41
CM015574.1_RaGOO	1069000	43054107	0	0	0.0000	20	16	0.64	0.65	1.25
CM015574.1_RaGOO	1070000	43054107	0	0	0.0000	21	17	0.67	0.71	1.19
CM015574.1_RaGOO	1071000	43054107	0	0	0.0000	24	16	0.78	0.65	1.51
CM015574.1_RaGOO	1072000	43054107	0	0	0.0000	26	18	0.85	0.71	1.50
CM015574.1_RaGOO	1073000	43054107	0	0	0.0000	25	19	0.82	0.77	1.34
CM015574.1_RaGOO	1074000	43054107	0	0	0.0000	25	19	0.81	0.76	1.35
CM015574.1_RaGOO	1075000	43054107	0	0	0.0000	28	19	0.90	0.76	1.50
CM015574.1_RaGOO	1076000	43054107	0	0	0.0000	31	20	1.01	0.80	1.59
CM015574.1_RaGOO	1077000	43054107	0	0	0.0000	23	16	0.73	0.66	1.40
CM015574.1_RaGOO	1078000	43054107	0	0	0.0000	28	18	0.91	0.75	1.53
CM015574.1_RaGOO	1079000	43054107	0	0	0.0000	32	25	1.02	1.00	1.28
CM015574.1_RaGOO	1080000	43054107	0	0	0.0000	27	24	0.86	0.99	1.10
CM015574.1_RaGOO	1081000	43054107	0	0	0.0000	28	23	0.92	0.94	1.23
CM015574.1_RaGOO	1082000	43054107	0	0	0.0000	36	30	1.18	1.23	1.20
CM015574.1_RaGOO	1083000	43054107	0	0	0.0000	35	30	1.14	1.21	1.19
CM015574.1_RaGOO	1084000	43054107	0	0	0.0000	38	23	1.21	0.94	1.62
CM015574.1_RaGOO	1085000	43054107	0	0	0.0000	28	23	0.89	0.93	1.20
CM015574.1_RaGOO	1086000	43054107	0	0	0.0000	27	23	0.87	0.94	1.16
CM015574.1_RaGOO	1087000	43054107	0	0	0.0000	26	18	0.85	0.73	1.47
CM015574.1_RaGOO	1088000	43054107	0	0	0.0000	25	18	0.82	0.73	1.41
CM015574.1_RaGOO	1089000	43054107	0	0	0.0000	26	21	0.84	0.85	1.26
CM015574.1_RaGOO	1090000	43054107	0	0	0.0000	33	29	1.08	1.18	1.15
CM015574.1_RaGOO	1091000	43054107	0	0	0.0097	57	44	1.84	1.81	1.28
CM015574.1_RaGOO	1092000	43054107	0	0	0.0000	67	47	2.15	1.91	1.42
CM015574.1_RaGOO	1093000	43054107	0	0	0.0000	37	32	1.19	1.30	1.15
CM015574.1_RaGOO	1094000	43054107	0	0	0.0000	44	38	1.41	1.54	1.15
CM015574.1_RaGOO	1095000	43054107	0	0	0.0116	50	34	1.60	1.39	1.45
CM015574.1_RaGOO	1096000	43054107	0	0	0.0000	47	33	1.50	1.34	1.42
CM015574.1_RaGOO	1097000	43054107	0	0	0.0000	51	38	1.65	1.54	1.35
CM015574.1_RaGOO	1098000	43054107	0	0	0.0196	46	41	1.50	1.65	1.14
CM015574.1_RaGOO	1099000	43054107	0	0	0.1266	18	14	0.59	0.57	1.29
CM015574.1_RaGOO	1100000	43054107	2	0	0.0590	34	30	1.08	1.23	1.11
CM015574.1_RaGOO	1101000	43054107	0	0	0.0000	50	33	1.61	1.34	1.51
CM015574.1_RaGOO	1102000	43054107	0	0	0.0000	55	42	1.77	1.69	1.32
CM015574.1_RaGOO	1103000	43054107	0	0	0.0000	32	23	1.04	0.93	1.41
CM015574.1_RaGOO	1104000	43054107	0	0	0.0000	26	15	0.83	0.61	1.73
CM015574.1_RaGOO	1105000	43054107	0	0	0.0000	25	19	0.80	0.76	1.33
CM015574.1_RaGOO	1106000	43054107	0	0	0.0000	26	16	0.83	0.67	1.58
CM015574.1_RaGOO	1107000	43054107	1	0	0.0000	21	15	0.69	0.62	1.40
CM015574.1_RaGOO	1108000	43054107	0	0	0.0000	23	20	0.74	0.82	1.14
CM015574.1_RaGOO	1109000	43054107	0	0	0.0000	18	16	0.59	0.65	1.16
CM015574.1_RaGOO	1110000	43054107	0	0	0.0000	19	16	0.61	0.64	1.21
CM015574.1_RaGOO	1111000	43054107	0	1	0.0000	24	22	0.77	0.88	1.10
CM015574.1_RaGOO	1112000	43054107	0	0	0.0000	40	33	1.30	1.35	1.21
CM015574.1_RaGOO	1113000	43054107	0	0	0.0000	32	29	1.04	1.20	1.10
CM015574.1_RaGOO	1114000	43054107	0	0	0.0000	28	20	0.89	0.80	1.40
CM015574.1_RaGOO	1115000	43054107	0	0	0.0000	32	22	1.02	0.88	1.46
CM015574.1_RaGOO	1116000	43054107	0	5	0.0178	29	23	0.95	0.95	1.26
CM015574.1_RaGOO	1117000	43054107	0	0	0.0000	24	21	0.76	0.87	1.10
CM015574.1_RaGOO	1118000	43054107	0	0	0.0000	38	25	1.21	1.02	1.50
CM015574.1_RaGOO	1119000	43054107	0	0	0.0000	33	25	1.08	1.01	1.34
CM015574.1_RaGOO	1120000	43054107	0	0	0.0000	32	22	1.02	0.91	1.41
CM015574.1_RaGOO	1121000	43054107	1	0	0.0576	26	23	0.84	0.94	1.12
CM015574.1_RaGOO	1122000	43054107	0	0	0.0000	24	20	0.76	0.82	1.17
CM015574.1_RaGOO	1123000	43054107	0	0	0.0000	20	20	0.65	0.82	1.01
CM015574.1_RaGOO	1124000	43054107	0	0	0.0000	33	22	1.05	0.91	1.46
CM015574.1_RaGOO	1125000	43054107	0	0	0.0000	30	19	0.96	0.79	1.53
CM015574.1_RaGOO	1126000	43054107	0	0	0.0000	45	34	1.44	1.39	1.31
CM015574.1_RaGOO	1127000	43054107	0	1	0.0000	21	17	0.68	0.70	1.23
CM015574.1_RaGOO	1128000	43054107	0	0	0.0000	27	23	0.87	0.92	1.20
CM015574.1_RaGOO	1129000	43054107	0	0	0.0000	24	17	0.77	0.68	1.42
CM015574.1_RaGOO	1130000	43054107	0	0	0.0000	28	20	0.90	0.80	1.41
CM015574.1_RaGOO	1131000	43054107	0	0	0.0000	26	21	0.85	0.87	1.23
CM015574.1_RaGOO	1132000	43054107	0	0	0.0000	26	23	0.85	0.94	1.14
CM015574.1_RaGOO	1133000	43054107	1	0	0.0000	22	18	0.70	0.71	1.23
CM015574.1_RaGOO	1134000	43054107	9	0	0.0000	23	21	0.75	0.87	1.09
CM015574.1_RaGOO	1135000	43054107	0	0	0.0000	28	19	0.91	0.76	1.52
CM015574.1_RaGOO	1136000	43054107	0	0	0.0000	29	18	0.92	0.74	1.58
CM015574.1_RaGOO	1137000	43054107	0	0	0.0000	31	23	1.00	0.93	1.36
CM015574.1_RaGOO	1138000	43054107	0	0	0.0930	32	25	1.02	1.02	1.26
CM015574.1_RaGOO	1139000	43054107	0	0	0.0000	33	24	1.05	0.98	1.36
CM015574.1_RaGOO	1140000	43054107	0	0	0.0000	33	22	1.05	0.90	1.47
CM015574.1_RaGOO	1141000	43054107	0	0	0.0000	34	21	1.11	0.84	1.66
CM015574.1_RaGOO	1142000	43054107	0	0	0.0921	30	23	0.95	0.95	1.27
CM015574.1_RaGOO	1143000	43054107	0	0	0.0000	32	23	1.04	0.93	1.41
CM015574.1_RaGOO	1144000	43054107	0	0	0.1456	24	19	0.77	0.77	1.26
CM015574.1_RaGOO	1145000	43054107	0	0	0.0000	30	25	0.95	1.00	1.20
CM015574.1_RaGOO	1146000	43054107	0	0	0.0000	25	20	0.81	0.81	1.26
CM015574.1_RaGOO	1147000	43054107	0	0	0.0141	15	12	0.48	0.48	1.28
CM015574.1_RaGOO	1148000	43054107	0	0	0.0027	36	29	1.17	1.17	1.26
CM015574.1_RaGOO	1149000	43054107	0	0	0.0000	20	17	0.66	0.70	1.18
CM015574.1_RaGOO	1150000	43054107	0	0	0.0485	25	19	0.79	0.78	1.28
CM015574.1_RaGOO	1151000	43054107	0	0	0.0000	23	17	0.74	0.68	1.38
CM015574.1_RaGOO	1152000	43054107	0	0	0.0000	21	16	0.69	0.65	1.33
CM015574.1_RaGOO	1153000	43054107	0	0	0.0000	22	15	0.72	0.61	1.48
CM015574.1_RaGOO	1154000	43054107	0	0	0.0000	24	21	0.77	0.83	1.16
CM015574.1_RaGOO	1155000	43054107	0	0	0.0000	20	15	0.63	0.59	1.35
CM015574.1_RaGOO	1156000	43054107	2	0	0.0000	21	15	0.67	0.61	1.37
CM015574.1_RaGOO	1157000	43054107	0	0	0.0000	23	18	0.75	0.75	1.27
CM015574.1_RaGOO	1158000	43054107	0	0	0.0000	18	18	0.57	0.74	0.97
CM015574.1_RaGOO	1159000	43054107	0	0	0.0000	22	17	0.71	0.71	1.26
CM015574.1_RaGOO	1160000	43054107	0	0	0.0000	22	14	0.69	0.57	1.53
CM015574.1_RaGOO	1161000	43054107	0	0	0.0000	21	19	0.67	0.77	1.10
CM015574.1_RaGOO	1162000	43054107	0	0	0.0000	22	20	0.70	0.80	1.11
CM015574.1_RaGOO	1163000	43054107	0	0	0.0000	22	18	0.72	0.75	1.22
CM015574.1_RaGOO	1164000	43054107	0	0	0.0000	24	19	0.76	0.77	1.25
CM015574.1_RaGOO	1165000	43054107	0	0	0.0000	24	21	0.79	0.86	1.16
CM015574.1_RaGOO	1166000	43054107	0	0	0.0000	26	22	0.83	0.90	1.16
CM015574.1_RaGOO	1167000	43054107	0	0	0.0000	29	23	0.94	0.94	1.26
CM015574.1_RaGOO	1168000	43054107	0	0	0.0000	29	22	0.94	0.88	1.35
CM015574.1_RaGOO	1169000	43054107	0	0	0.0000	29	22	0.94	0.90	1.30
CM015574.1_RaGOO	1170000	43054107	0	0	0.0000	28	25	0.90	1.03	1.10
CM015574.1_RaGOO	1171000	43054107	0	0	0.0000	35	22	1.11	0.89	1.58
CM015574.1_RaGOO	1172000	43054107	0	0	0.0000	25	24	0.82	0.98	1.05
CM015574.1_RaGOO	1173000	43054107	0	0	0.0000	30	29	0.98	1.18	1.04
CM015574.1_RaGOO	1174000	43054107	0	0	0.0000	28	25	0.90	1.01	1.12
CM015574.1_RaGOO	1175000	43054107	0	0	0.0000	59	45	1.90	1.82	1.32
CM015574.1_RaGOO	1176000	43054107	0	1	0.0000	26	20	0.82	0.83	1.25
CM015574.1_RaGOO	1177000	43054107	0	0	0.0000	26	16	0.85	0.64	1.69
CM015574.1_RaGOO	1178000	43054107	0	0	0.0000	25	21	0.81	0.85	1.20
CM015574.1_RaGOO	1179000	43054107	0	0	0.0000	26	28	0.83	1.12	0.93
CM015574.1_RaGOO	1180000	43054107	0	0	0.0000	35	24	1.13	0.97	1.46
CM015574.1_RaGOO	1181000	43054107	0	0	0.0000	20	18	0.64	0.71	1.12
CM015574.1_RaGOO	1182000	43054107	0	0	0.0000	29	17	0.92	0.68	1.71
CM015574.1_RaGOO	1183000	43054107	0	0	0.0000	33	25	1.08	1.01	1.34
CM015574.1_RaGOO	1184000	43054107	0	0	0.0000	32	23	1.03	0.93	1.39
CM015574.1_RaGOO	1185000	43054107	0	0	0.0029	31	21	0.99	0.83	1.50
CM015574.1_RaGOO	1186000	43054107	0	0	0.0000	30	17	0.95	0.69	1.73
CM015574.1_RaGOO	1187000	43054107	0	0	0.0000	22	21	0.72	0.84	1.09
CM015574.1_RaGOO	1188000	43054107	0	0	0.0000	21	19	0.68	0.76	1.14
CM015574.1_RaGOO	1189000	43054107	0	0	0.0000	24	21	0.78	0.84	1.18
CM015574.1_RaGOO	1190000	43054107	0	0	0.0000	24	20	0.79	0.80	1.24
CM015574.1_RaGOO	1191000	43054107	0	0	0.0000	13	9	0.41	0.38	1.35
CM015574.1_RaGOO	1192000	43054107	0	0	0.0000	24	24	0.76	0.98	0.97
CM015574.1_RaGOO	1193000	43054107	0	1	0.0000	22	16	0.70	0.66	1.35
CM015574.1_RaGOO	1194000	43054107	0	0	0.0000	25	17	0.80	0.67	1.49
CM015574.1_RaGOO	1195000	43054107	8	0	0.0000	24	19	0.77	0.77	1.27
CM015574.1_RaGOO	1196000	43054107	0	0	0.0000	21	19	0.67	0.76	1.11
CM015574.1_RaGOO	1197000	43054107	0	0	0.0000	27	20	0.87	0.81	1.36
CM015574.1_RaGOO	1198000	43054107	0	0	0.0000	25	17	0.80	0.69	1.45
CM015574.1_RaGOO	1199000	43054107	3	0	0.0749	25	17	0.82	0.70	1.48
CM015574.1_RaGOO	1200000	43054107	0	0	0.0000	27	14	0.86	0.57	1.89
CM015574.1_RaGOO	1201000	43054107	0	0	0.0000	28	17	0.92	0.67	1.72
CM015574.1_RaGOO	1202000	43054107	0	0	0.0000	26	24	0.84	0.98	1.08
CM015574.1_RaGOO	1203000	43054107	0	0	0.0000	30	24	0.98	0.98	1.26
CM015574.1_RaGOO	1204000	43054107	0	0	0.0000	33	30	1.07	1.23	1.09
CM015574.1_RaGOO	1205000	43054107	0	0	0.0000	32	22	1.03	0.88	1.47
CM015574.1_RaGOO	1206000	43054107	0	0	0.0000	28	24	0.90	0.96	1.17
CM015574.1_RaGOO	1207000	43054107	0	0	0.0000	30	19	0.95	0.75	1.59
CM015574.1_RaGOO	1208000	43054107	0	0	0.0000	26	19	0.84	0.79	1.34
CM015574.1_RaGOO	1209000	43054107	0	0	0.0000	23	20	0.73	0.81	1.13
CM015574.1_RaGOO	1210000	43054107	0	0	0.0000	21	20	0.69	0.82	1.06
CM015574.1_RaGOO	1211000	43054107	0	0	0.0000	27	18	0.87	0.75	1.47
CM015574.1_RaGOO	1212000	43054107	0	0	0.0000	22	16	0.69	0.66	1.32
CM015574.1_RaGOO	1213000	43054107	0	0	0.0081	24	25	0.77	1.02	0.96
CM015574.1_RaGOO	1214000	43054107	0	0	0.0233	28	21	0.92	0.85	1.36
CM015574.1_RaGOO	1215000	43054107	0	0	0.0000	17	16	0.54	0.64	1.06
CM015574.1_RaGOO	1216000	43054107	0	0	0.0000	26	22	0.83	0.90	1.16
CM015574.1_RaGOO	1217000	43054107	0	0	0.0000	25	23	0.81	0.93	1.09
CM015574.1_RaGOO	1218000	43054107	0	0	0.0000	24	20	0.77	0.79	1.21
CM015574.1_RaGOO	1219000	43054107	0	0	0.0000	32	26	1.04	1.07	1.23
CM015574.1_RaGOO	1220000	43054107	0	0	0.0000	26	24	0.85	0.98	1.10
CM015574.1_RaGOO	1221000	43054107	0	0	0.0000	26	22	0.83	0.89	1.17
CM015574.1_RaGOO	1222000	43054107	0	0	0.0000	27	19	0.87	0.79	1.39
CM015574.1_RaGOO	1223000	43054107	0	0	0.0000	21	21	0.68	0.86	0.99
CM015574.1_RaGOO	1224000	43054107	0	0	0.0000	28	20	0.89	0.83	1.36
CM015574.1_RaGOO	1225000	43054107	0	0	0.0000	23	17	0.73	0.70	1.31
CM015574.1_RaGOO	1226000	43054107	0	0	0.0000	25	23	0.81	0.92	1.12
CM015574.1_RaGOO	1227000	43054107	0	0	0.0000	28	23	0.91	0.93	1.24
CM015574.1_RaGOO	1228000	43054107	0	0	0.0000	28	21	0.90	0.85	1.34
CM015574.1_RaGOO	1229000	43054107	0	0	0.0000	32	21	1.02	0.86	1.50
CM015574.1_RaGOO	1230000	43054107	0	0	0.0000	35	22	1.12	0.90	1.58
CM015574.1_RaGOO	1231000	43054107	1	0	0.0023	31	22	1.01	0.89	1.44
CM015574.1_RaGOO	1232000	43054107	0	0	0.0000	24	21	0.76	0.86	1.11
CM015574.1_RaGOO	1233000	43054107	0	0	0.0000	34	21	1.11	0.87	1.60
CM015574.1_RaGOO	1234000	43054107	0	0	0.0000	25	22	0.80	0.89	1.13
CM015574.1_RaGOO	1235000	43054107	0	1	0.0000	21	18	0.68	0.74	1.16
CM015574.1_RaGOO	1236000	43054107	0	0	0.0000	28	20	0.91	0.79	1.44
CM015574.1_RaGOO	1237000	43054107	0	0	0.0000	25	17	0.81	0.68	1.51
CM015574.1_RaGOO	1238000	43054107	0	0	0.0000	18	13	0.59	0.52	1.43
CM015574.1_RaGOO	1239000	43054107	0	0	0.0000	47	30	1.51	1.21	1.58
CM015574.1_RaGOO	1240000	43054107	0	0	0.0000	35	29	1.13	1.18	1.20
CM015574.1_RaGOO	1241000	43054107	0	0	0.0000	25	20	0.82	0.81	1.28
CM015574.1_RaGOO	1242000	43054107	0	0	0.0014	27	20	0.86	0.83	1.30
CM015574.1_RaGOO	1243000	43054107	0	0	0.0000	26	19	0.84	0.76	1.39
CM015574.1_RaGOO	1244000	43054107	0	0	0.0103	27	21	0.86	0.86	1.26
CM015574.1_RaGOO	1245000	43054107	0	0	0.0000	23	25	0.73	1.03	0.89
CM015574.1_RaGOO	1246000	43054107	0	0	0.0000	24	19	0.77	0.75	1.29
CM015574.1_RaGOO	1247000	43054107	0	0	0.0000	28	16	0.90	0.66	1.72
CM015574.1_RaGOO	1248000	43054107	0	0	0.0140	16	13	0.52	0.53	1.23
CM015574.1_RaGOO	1249000	43054107	0	0	0.0864	26	20	0.82	0.83	1.25
CM015574.1_RaGOO	1250000	43054107	0	0	0.0000	24	20	0.78	0.83	1.19
CM015574.1_RaGOO	1251000	43054107	0	1	0.0000	34	30	1.09	1.21	1.14
CM015574.1_RaGOO	1252000	43054107	0	0	0.0000	27	22	0.86	0.90	1.21
CM015574.1_RaGOO	1253000	43054107	0	0	0.0000	24	18	0.78	0.71	1.39
CM015574.1_RaGOO	1254000	43054107	0	0	0.0000	22	16	0.69	0.64	1.37
CM015574.1_RaGOO	1255000	43054107	0	0	0.0000	21	20	0.68	0.80	1.07
CM015574.1_RaGOO	1256000	43054107	0	0	0.0000	19	14	0.62	0.58	1.37
CM015574.1_RaGOO	1257000	43054107	0	0	0.0671	23	19	0.74	0.77	1.21
CM015574.1_RaGOO	1258000	43054107	0	0	0.0000	25	26	0.82	1.05	0.98
CM015574.1_RaGOO	1259000	43054107	0	0	0.0000	25	19	0.81	0.78	1.30
CM015574.1_RaGOO	1260000	43054107	0	0	0.0000	24	16	0.79	0.66	1.51
CM015574.1_RaGOO	1261000	43054107	0	0	0.0000	28	23	0.91	0.92	1.25
CM015574.1_RaGOO	1262000	43054107	0	0	0.0299	26	19	0.84	0.78	1.35
CM015574.1_RaGOO	1263000	43054107	0	0	0.0000	29	25	0.92	1.00	1.16
CM015574.1_RaGOO	1264000	43054107	0	0	0.0000	24	19	0.77	0.78	1.25
CM015574.1_RaGOO	1265000	43054107	0	0	0.0000	23	23	0.73	0.92	1.00
CM015574.1_RaGOO	1266000	43054107	0	0	0.0000	20	18	0.66	0.73	1.13
CM015574.1_RaGOO	1267000	43054107	0	0	0.0000	25	22	0.79	0.88	1.14
CM015574.1_RaGOO	1268000	43054107	0	0	0.0000	23	20	0.75	0.80	1.17
CM015574.1_RaGOO	1269000	43054107	0	0	0.0000	30	22	0.96	0.88	1.38
CM015574.1_RaGOO	1270000	43054107	1	0	0.0079	25	27	0.79	1.09	0.92
CM015574.1_RaGOO	1271000	43054107	0	0	0.0000	34	28	1.11	1.15	1.22
CM015574.1_RaGOO	1272000	43054107	0	0	0.0000	27	21	0.87	0.87	1.26
CM015574.1_RaGOO	1273000	43054107	0	0	0.0000	28	20	0.89	0.80	1.40
CM015574.1_RaGOO	1274000	43054107	0	0	0.0000	23	21	0.74	0.84	1.10
CM015574.1_RaGOO	1275000	43054107	0	0	0.0090	27	17	0.88	0.69	1.62
CM015574.1_RaGOO	1276000	43054107	0	0	0.0000	29	20	0.93	0.82	1.43
CM015574.1_RaGOO	1277000	43054107	0	0	0.0000	28	19	0.91	0.78	1.47
CM015574.1_RaGOO	1278000	43054107	0	0	0.0100	24	19	0.79	0.77	1.28
CM015574.1_RaGOO	1279000	43054107	0	0	0.0000	24	22	0.76	0.88	1.09
CM015574.1_RaGOO	1280000	43054107	0	0	0.0005	23	20	0.76	0.81	1.18
CM015574.1_RaGOO	1281000	43054107	0	0	0.0000	21	22	0.69	0.89	0.99
CM015574.1_RaGOO	1282000	43054107	0	0	0.0000	18	21	0.57	0.87	0.83
CM015574.1_RaGOO	1283000	43054107	0	0	0.0000	34	25	1.10	1.01	1.38
CM015574.1_RaGOO	1284000	43054107	0	0	0.0000	24	21	0.79	0.84	1.18
CM015574.1_RaGOO	1285000	43054107	0	0	0.0000	22	20	0.71	0.80	1.11
CM015574.1_RaGOO	1286000	43054107	0	0	0.0000	25	20	0.81	0.79	1.29
CM015574.1_RaGOO	1287000	43054107	0	0	0.0000	23	16	0.76	0.66	1.44
CM015574.1_RaGOO	1288000	43054107	0	0	0.0000	23	23	0.74	0.95	0.99
CM015574.1_RaGOO	1289000	43054107	0	0	0.0000	27	22	0.87	0.89	1.24
CM015574.1_RaGOO	1290000	43054107	0	0	0.0000	29	25	0.94	1.01	1.17
CM015574.1_RaGOO	1291000	43054107	0	0	0.0000	32	20	1.03	0.81	1.60
CM015574.1_RaGOO	1292000	43054107	0	0	0.0000	26	17	0.85	0.70	1.53
CM015574.1_RaGOO	1293000	43054107	0	0	0.0000	23	21	0.74	0.87	1.07
CM015574.1_RaGOO	1294000	43054107	0	0	0.0000	24	24	0.77	0.97	1.00
CM015574.1_RaGOO	1295000	43054107	0	0	0.0000	27	20	0.86	0.80	1.36
CM015574.1_RaGOO	1296000	43054107	0	0	0.0000	18	13	0.58	0.55	1.35
CM015574.1_RaGOO	1297000	43054107	0	0	0.0000	25	19	0.82	0.78	1.32
CM015574.1_RaGOO	1298000	43054107	0	0	0.0000	21	21	0.69	0.86	1.02
CM015574.1_RaGOO	1299000	43054107	0	0	0.0000	22	18	0.72	0.74	1.23
CM015574.1_RaGOO	1300000	43054107	0	0	0.0000	29	21	0.93	0.86	1.36
CM015574.1_RaGOO	1301000	43054107	0	0	0.0578	26	17	0.84	0.69	1.54
CM015574.1_RaGOO	1302000	43054107	0	0	0.0000	31	23	1.01	0.93	1.37
CM015574.1_RaGOO	1303000	43054107	0	0	0.0000	28	23	0.91	0.95	1.22
CM015574.1_RaGOO	1304000	43054107	0	0	0.0000	34	25	1.11	1.00	1.40
CM015574.1_RaGOO	1305000	43054107	0	0	0.0000	36	24	1.18	0.98	1.52
CM015574.1_RaGOO	1306000	43054107	0	0	0.0000	30	24	0.96	0.98	1.24
CM015574.1_RaGOO	1307000	43054107	0	0	0.0051	29	20	0.93	0.82	1.43
CM015574.1_RaGOO	1308000	43054107	1	0	0.0000	19	13	0.61	0.53	1.45
CM015574.1_RaGOO	1309000	43054107	0	0	0.0000	26	20	0.83	0.80	1.30
CM015574.1_RaGOO	1310000	43054107	0	0	0.0000	30	21	0.97	0.85	1.44
CM015574.1_RaGOO	1311000	43054107	0	0	0.0000	23	19	0.74	0.76	1.24
CM015574.1_RaGOO	1312000	43054107	0	0	0.0000	24	21	0.76	0.87	1.10
CM015574.1_RaGOO	1313000	43054107	0	0	0.0000	25	18	0.82	0.72	1.43
CM015574.1_RaGOO	1314000	43054107	0	0	0.0000	32	18	1.04	0.73	1.79
CM015574.1_RaGOO	1315000	43054107	0	0	0.0000	30	23	0.97	0.92	1.32
CM015574.1_RaGOO	1316000	43054107	0	0	0.0000	32	24	1.02	0.99	1.30
CM015574.1_RaGOO	1317000	43054107	0	0	0.0000	28	29	0.89	1.18	0.96
CM015574.1_RaGOO	1318000	43054107	0	0	0.0000	28	21	0.91	0.85	1.34
CM015574.1_RaGOO	1319000	43054107	0	0	0.0390	29	22	0.95	0.90	1.33
CM015574.1_RaGOO	1320000	43054107	0	0	0.0000	27	17	0.86	0.71	1.52
CM015574.1_RaGOO	1321000	43054107	0	0	0.0000	30	22	0.97	0.90	1.36
CM015574.1_RaGOO	1322000	43054107	0	0	0.0000	21	25	0.69	1.02	0.85
CM015574.1_RaGOO	1323000	43054107	0	0	0.0248	27	22	0.88	0.90	1.23
CM015574.1_RaGOO	1324000	43054107	0	0	0.0000	25	19	0.82	0.76	1.34
CM015574.1_RaGOO	1325000	43054107	0	0	0.0000	26	18	0.82	0.74	1.41
CM015574.1_RaGOO	1326000	43054107	0	0	0.0000	33	27	1.08	1.11	1.23
CM015574.1_RaGOO	1327000	43054107	0	1	0.0000	28	24	0.90	0.98	1.16
CM015574.1_RaGOO	1328000	43054107	0	0	0.0000	28	21	0.90	0.87	1.30
CM015574.1_RaGOO	1329000	43054107	0	0	0.0000	29	18	0.92	0.73	1.60
CM015574.1_RaGOO	1330000	43054107	0	0	0.0261	29	20	0.94	0.81	1.46
CM015574.1_RaGOO	1331000	43054107	0	0	0.0000	27	17	0.88	0.67	1.65
CM015574.1_RaGOO	1332000	43054107	0	0	0.0000	23	21	0.73	0.84	1.09
CM015574.1_RaGOO	1333000	43054107	0	0	0.0178	25	25	0.80	1.01	0.99
CM015574.1_RaGOO	1334000	43054107	0	0	0.0069	37	25	1.21	1.01	1.50
CM015574.1_RaGOO	1335000	43054107	1	0	0.0000	26	21	0.83	0.85	1.22
CM015574.1_RaGOO	1336000	43054107	0	0	0.0000	29	22	0.94	0.90	1.32
CM015574.1_RaGOO	1337000	43054107	0	0	0.0000	24	16	0.78	0.65	1.51
CM015574.1_RaGOO	1338000	43054107	0	0	0.0000	24	22	0.76	0.91	1.05
CM015574.1_RaGOO	1339000	43054107	0	0	0.0000	33	27	1.06	1.08	1.24
CM015574.1_RaGOO	1340000	43054107	1	0	0.0000	33	24	1.06	0.97	1.37
CM015574.1_RaGOO	1341000	43054107	0	0	0.0039	30	27	0.98	1.11	1.11
CM015574.1_RaGOO	1342000	43054107	0	0	0.0000	29	26	0.93	1.04	1.13
CM015574.1_RaGOO	1343000	43054107	0	0	0.0000	31	26	1.00	1.06	1.20
CM015574.1_RaGOO	1344000	43054107	0	0	0.0000	26	22	0.84	0.89	1.19
CM015574.1_RaGOO	1345000	43054107	0	0	0.0000	24	22	0.78	0.89	1.10
CM015574.1_RaGOO	1346000	43054107	0	0	0.0000	31	21	0.99	0.87	1.42
CM015574.1_RaGOO	1347000	43054107	0	0	0.0000	28	20	0.91	0.81	1.41
CM015574.1_RaGOO	1348000	43054107	0	0	0.0000	31	26	0.99	1.07	1.17
CM015574.1_RaGOO	1349000	43054107	0	0	0.0000	32	17	1.02	0.69	1.85
CM015574.1_RaGOO	1350000	43054107	0	0	0.0000	35	22	1.13	0.90	1.58
CM015574.1_RaGOO	1351000	43054107	0	0	0.0000	29	20	0.95	0.81	1.48
CM015574.1_RaGOO	1352000	43054107	0	0	0.0000	30	19	0.96	0.77	1.57
CM015574.1_RaGOO	1353000	43054107	0	0	0.0000	26	23	0.83	0.93	1.12
CM015574.1_RaGOO	1354000	43054107	0	0	0.0000	26	21	0.84	0.86	1.23
CM015574.1_RaGOO	1355000	43054107	0	0	0.0000	23	21	0.75	0.85	1.12
CM015574.1_RaGOO	1356000	43054107	0	0	0.0000	25	20	0.80	0.82	1.23
CM015574.1_RaGOO	1357000	43054107	0	0	0.0000	24	21	0.76	0.87	1.10
CM015574.1_RaGOO	1358000	43054107	0	0	0.0000	23	24	0.73	0.99	0.92
CM015574.1_RaGOO	1359000	43054107	0	0	0.0000	26	20	0.84	0.82	1.29
CM015574.1_RaGOO	1360000	43054107	0	0	0.0000	28	18	0.89	0.75	1.50
CM015574.1_RaGOO	1361000	43054107	0	0	0.0000	28	18	0.91	0.75	1.52
CM015574.1_RaGOO	1362000	43054107	0	0	0.0000	31	16	1.01	0.67	1.90
CM015574.1_RaGOO	1363000	43054107	0	0	0.0209	33	21	1.05	0.85	1.56
CM015574.1_RaGOO	1364000	43054107	0	0	0.0000	32	25	1.03	1.03	1.27
CM015574.1_RaGOO	1365000	43054107	0	0	0.0000	26	21	0.84	0.85	1.24
CM015574.1_RaGOO	1366000	43054107	0	0	0.0538	27	22	0.87	0.88	1.26
CM015574.1_RaGOO	1367000	43054107	0	0	0.0000	27	22	0.88	0.91	1.22
CM015574.1_RaGOO	1368000	43054107	0	0	0.0000	28	23	0.90	0.94	1.20
CM015574.1_RaGOO	1369000	43054107	1	0	0.0000	24	18	0.77	0.72	1.36
CM015574.1_RaGOO	1370000	43054107	0	0	0.0000	22	19	0.69	0.77	1.14
CM015574.1_RaGOO	1371000	43054107	0	0	0.0000	33	27	1.05	1.09	1.21
CM015574.1_RaGOO	1372000	43054107	0	0	0.0000	32	25	1.02	1.00	1.29
CM015574.1_RaGOO	1373000	43054107	0	0	0.0000	44	30	1.41	1.21	1.47
CM015574.1_RaGOO	1374000	43054107	0	0	0.0000	22	19	0.71	0.77	1.16
CM015574.1_RaGOO	1375000	43054107	0	0	0.0000	22	17	0.70	0.70	1.26
CM015574.1_RaGOO	1376000	43054107	0	0	0.0000	22	18	0.71	0.75	1.20
CM015574.1_RaGOO	1377000	43054107	0	0	0.0000	31	21	0.99	0.85	1.47
CM015574.1_RaGOO	1378000	43054107	0	0	0.0000	22	20	0.70	0.80	1.10
CM015574.1_RaGOO	1379000	43054107	0	0	0.0000	24	19	0.79	0.76	1.31
CM015574.1_RaGOO	1380000	43054107	0	0	0.0000	28	18	0.91	0.74	1.56
CM015574.1_RaGOO	1381000	43054107	0	0	0.0000	24	16	0.77	0.63	1.52
CM015574.1_RaGOO	1382000	43054107	0	0	0.0000	27	23	0.87	0.95	1.15
CM015574.1_RaGOO	1383000	43054107	0	0	0.0000	30	22	0.95	0.89	1.35
CM015574.1_RaGOO	1384000	43054107	0	0	0.0000	30	28	0.98	1.15	1.08
CM015574.1_RaGOO	1385000	43054107	1	0	0.0000	28	21	0.89	0.85	1.32
CM015574.1_RaGOO	1386000	43054107	0	0	0.0000	40	30	1.30	1.20	1.36
CM015574.1_RaGOO	1387000	43054107	0	0	0.0000	22	18	0.70	0.74	1.19
CM015574.1_RaGOO	1388000	43054107	0	0	0.0000	35	31	1.12	1.26	1.12
CM015574.1_RaGOO	1389000	43054107	0	0	0.0000	49	37	1.57	1.52	1.30
CM015574.1_RaGOO	1390000	43054107	0	0	0.0000	27	19	0.87	0.79	1.38
CM015574.1_RaGOO	1391000	43054107	0	1	0.0000	26	18	0.83	0.75	1.40
CM015574.1_RaGOO	1392000	43054107	0	0	0.0000	20	18	0.64	0.72	1.12
CM015574.1_RaGOO	1393000	43054107	0	0	0.0000	24	14	0.78	0.56	1.75
CM015574.1_RaGOO	1394000	43054107	0	0	0.0991	20	20	0.66	0.80	1.03
CM015574.1_RaGOO	1395000	43054107	0	0	0.0000	25	18	0.80	0.74	1.35
CM015574.1_RaGOO	1396000	43054107	1	0	0.0000	18	15	0.57	0.59	1.22
CM015574.1_RaGOO	1397000	43054107	0	0	0.0000	28	15	0.89	0.62	1.80
CM015574.1_RaGOO	1398000	43054107	0	0	0.0000	15	16	0.48	0.64	0.95
CM015574.1_RaGOO	1399000	43054107	0	0	0.0000	29	26	0.94	1.05	1.13
CM015574.1_RaGOO	1400000	43054107	0	0	0.0000	31	24	1.02	0.99	1.30
CM015574.1_RaGOO	1401000	43054107	0	0	0.0174	31	24	1.00	0.98	1.29
CM015574.1_RaGOO	1402000	43054107	0	0	0.0000	30	18	0.97	0.71	1.72
CM015574.1_RaGOO	1403000	43054107	0	0	0.0000	29	20	0.94	0.81	1.47
CM015574.1_RaGOO	1404000	43054107	0	0	0.0000	23	24	0.74	0.96	0.97
CM015574.1_RaGOO	1405000	43054107	0	0	0.0000	34	29	1.10	1.17	1.19
CM015574.1_RaGOO	1406000	43054107	0	0	0.0000	31	24	0.99	0.96	1.29
CM015574.1_RaGOO	1407000	43054107	0	0	0.0000	39	29	1.25	1.18	1.34
CM015574.1_RaGOO	1408000	43054107	0	0	0.0000	21	23	0.67	0.93	0.91
CM015574.1_RaGOO	1409000	43054107	0	0	0.0000	31	28	1.00	1.12	1.12
CM015574.1_RaGOO	1410000	43054107	0	1	0.0024	35	31	1.12	1.24	1.13
CM015574.1_RaGOO	1411000	43054107	0	0	0.0000	38	29	1.23	1.19	1.31
CM015574.1_RaGOO	1412000	43054107	0	0	0.0000	36	21	1.16	0.86	1.69
CM015574.1_RaGOO	1413000	43054107	0	0	0.0000	26	18	0.85	0.74	1.46
CM015574.1_RaGOO	1414000	43054107	0	0	0.0000	25	22	0.82	0.88	1.17
CM015574.1_RaGOO	1415000	43054107	0	1	0.0000	21	18	0.69	0.75	1.16
CM015574.1_RaGOO	1416000	43054107	0	0	0.0000	23	20	0.73	0.81	1.14
CM015574.1_RaGOO	1417000	43054107	0	0	0.0000	22	14	0.70	0.58	1.51
CM015574.1_RaGOO	1418000	43054107	0	0	0.0000	26	18	0.83	0.72	1.44
CM015574.1_RaGOO	1419000	43054107	0	0	0.0000	24	18	0.77	0.71	1.36
CM015574.1_RaGOO	1420000	43054107	0	0	0.0000	33	23	1.06	0.94	1.41
CM015574.1_RaGOO	1421000	43054107	0	0	0.0001	30	21	0.97	0.85	1.44
CM015574.1_RaGOO	1422000	43054107	0	0	0.0000	27	19	0.88	0.78	1.43
CM015574.1_RaGOO	1423000	43054107	0	0	0.0000	31	25	1.01	1.02	1.24
CM015574.1_RaGOO	1424000	43054107	0	0	0.0000	29	20	0.94	0.80	1.49
CM015574.1_RaGOO	1425000	43054107	0	0	0.0000	34	22	1.08	0.90	1.52
CM015574.1_RaGOO	1426000	43054107	0	0	0.0000	37	31	1.19	1.24	1.21
CM015574.1_RaGOO	1427000	43054107	0	0	0.0000	33	24	1.05	0.97	1.36
CM015574.1_RaGOO	1428000	43054107	0	0	0.0000	30	21	0.96	0.87	1.40
CM015574.1_RaGOO	1429000	43054107	0	0	0.0000	28	24	0.89	0.98	1.14
CM015574.1_RaGOO	1430000	43054107	0	0	0.0000	29	20	0.95	0.83	1.44
CM015574.1_RaGOO	1431000	43054107	0	0	0.0000	33	24	1.06	0.97	1.37
CM015574.1_RaGOO	1432000	43054107	0	0	0.0000	36	25	1.15	1.03	1.42
CM015574.1_RaGOO	1433000	43054107	0	0	0.0000	29	23	0.93	0.94	1.25
CM015574.1_RaGOO	1434000	43054107	0	0	0.0000	32	23	1.03	0.94	1.38
CM015574.1_RaGOO	1435000	43054107	1	0	0.0000	33	28	1.08	1.15	1.18
CM015574.1_RaGOO	1436000	43054107	0	0	0.0000	29	19	0.93	0.79	1.48
CM015574.1_RaGOO	1437000	43054107	0	0	0.0000	31	22	0.99	0.89	1.39
CM015574.1_RaGOO	1438000	43054107	0	0	0.0000	38	25	1.22	1.02	1.50
CM015574.1_RaGOO	1439000	43054107	0	0	0.0000	29	18	0.94	0.74	1.60
CM015574.1_RaGOO	1440000	43054107	0	0	0.0000	20	22	0.64	0.87	0.93
CM015574.1_RaGOO	1441000	43054107	0	0	0.0000	22	17	0.70	0.70	1.26
CM015574.1_RaGOO	1442000	43054107	0	0	0.0000	34	30	1.09	1.21	1.13
CM015574.1_RaGOO	1443000	43054107	0	0	0.0000	27	24	0.87	0.99	1.11
CM015574.1_RaGOO	1444000	43054107	0	0	0.0000	29	22	0.93	0.88	1.33
CM015574.1_RaGOO	1445000	43054107	0	0	0.0000	27	22	0.87	0.88	1.25
CM015574.1_RaGOO	1446000	43054107	0	0	0.0000	25	22	0.82	0.90	1.14
CM015574.1_RaGOO	1447000	43054107	0	0	0.0000	27	20	0.87	0.83	1.33
CM015574.1_RaGOO	1448000	43054107	0	0	0.0000	20	15	0.64	0.59	1.35
CM015574.1_RaGOO	1449000	43054107	0	0	0.0000	23	18	0.73	0.72	1.28
CM015574.1_RaGOO	1450000	43054107	0	0	0.0000	26	23	0.84	0.94	1.13
CM015574.1_RaGOO	1451000	43054107	0	0	0.0000	29	22	0.92	0.88	1.33
CM015574.1_RaGOO	1452000	43054107	0	0	0.0000	33	25	1.06	1.01	1.33
CM015574.1_RaGOO	1453000	43054107	0	0	0.0000	27	27	0.87	1.10	1.00
CM015574.1_RaGOO	1454000	43054107	0	0	0.0000	29	26	0.95	1.05	1.14
CM015574.1_RaGOO	1455000	43054107	0	0	0.0000	30	26	0.95	1.04	1.16
CM015574.1_RaGOO	1456000	43054107	0	0	0.0000	30	23	0.98	0.94	1.32
CM015574.1_RaGOO	1457000	43054107	0	0	0.0000	28	21	0.89	0.84	1.34
CM015574.1_RaGOO	1458000	43054107	0	0	0.0000	25	22	0.82	0.88	1.18
CM015574.1_RaGOO	1459000	43054107	0	0	0.0000	27	20	0.87	0.81	1.35
CM015574.1_RaGOO	1460000	43054107	0	0	0.0400	29	21	0.92	0.85	1.37
CM015574.1_RaGOO	1461000	43054107	0	0	0.0000	27	24	0.86	0.97	1.12
CM015574.1_RaGOO	1462000	43054107	0	0	0.0000	27	20	0.87	0.81	1.36
CM015574.1_RaGOO	1463000	43054107	0	0	0.0000	33	25	1.07	1.03	1.31
CM015574.1_RaGOO	1464000	43054107	0	0	0.0000	31	24	0.99	0.98	1.27
CM015574.1_RaGOO	1465000	43054107	0	1	0.0000	24	21	0.77	0.87	1.11
CM015574.1_RaGOO	1466000	43054107	0	0	0.0000	24	19	0.78	0.76	1.30
CM015574.1_RaGOO	1467000	43054107	0	0	0.0000	30	21	0.96	0.85	1.43
CM015574.1_RaGOO	1468000	43054107	0	0	0.0000	25	20	0.80	0.81	1.24
CM015574.1_RaGOO	1469000	43054107	0	0	0.0000	26	26	0.84	1.06	1.00
CM015574.1_RaGOO	1470000	43054107	0	0	0.0000	30	25	0.95	1.00	1.20
CM015574.1_RaGOO	1471000	43054107	0	0	0.0000	28	24	0.90	0.97	1.17
CM015574.1_RaGOO	1472000	43054107	0	0	0.0000	38	31	1.23	1.24	1.26
CM015574.1_RaGOO	1473000	43054107	1	0	0.0000	36	23	1.15	0.92	1.58
CM015574.1_RaGOO	1474000	43054107	4	0	0.0000	35	25	1.12	1.03	1.37
CM015574.1_RaGOO	1475000	43054107	0	0	0.0000	29	21	0.95	0.86	1.39
CM015574.1_RaGOO	1476000	43054107	0	0	0.0000	24	23	0.78	0.94	1.04
CM015574.1_RaGOO	1477000	43054107	0	0	0.0000	26	18	0.83	0.73	1.45
CM015574.1_RaGOO	1478000	43054107	0	0	0.0000	27	25	0.87	1.03	1.06
CM015574.1_RaGOO	1479000	43054107	0	0	0.0000	31	28	0.99	1.13	1.10
CM015574.1_RaGOO	1480000	43054107	0	0	0.0000	32	24	1.03	0.97	1.34
CM015574.1_RaGOO	1481000	43054107	0	0	0.0088	37	23	1.20	0.93	1.62
CM015574.1_RaGOO	1482000	43054107	0	0	0.0000	28	24	0.90	0.97	1.17
CM015574.1_RaGOO	1483000	43054107	0	0	0.0000	30	25	0.96	1.01	1.20
CM015574.1_RaGOO	1484000	43054107	0	0	0.0000	25	23	0.81	0.95	1.07
CM015574.1_RaGOO	1485000	43054107	0	0	0.0000	25	25	0.82	1.01	1.02
CM015574.1_RaGOO	1486000	43054107	0	0	0.0000	34	26	1.10	1.07	1.29
CM015574.1_RaGOO	1487000	43054107	0	0	0.0000	30	25	0.98	1.03	1.20
CM015574.1_RaGOO	1488000	43054107	0	0	0.0000	36	26	1.16	1.07	1.36
CM015574.1_RaGOO	1489000	43054107	0	0	0.0000	33	25	1.06	1.01	1.33
CM015574.1_RaGOO	1490000	43054107	0	0	0.0000	39	24	1.26	0.96	1.66
CM015574.1_RaGOO	1491000	43054107	0	0	0.0000	23	20	0.73	0.82	1.13
CM015574.1_RaGOO	1492000	43054107	0	0	0.0000	23	24	0.75	0.99	0.95
CM015574.1_RaGOO	1493000	43054107	0	0	0.0000	25	22	0.81	0.89	1.15
CM015574.1_RaGOO	1494000	43054107	0	0	0.0285	21	18	0.68	0.73	1.17
CM015574.1_RaGOO	1495000	43054107	0	0	0.0434	23	16	0.74	0.63	1.47
CM015574.1_RaGOO	1496000	43054107	0	0	0.0000	23	16	0.74	0.67	1.40
CM015574.1_RaGOO	1497000	43054107	0	0	0.0196	21	18	0.69	0.71	1.22
CM015574.1_RaGOO	1498000	43054107	0	0	0.0325	27	20	0.88	0.83	1.34
CM015574.1_RaGOO	1499000	43054107	1	0	0.0000	28	19	0.90	0.76	1.50
CM015574.1_RaGOO	1500000	43054107	0	0	0.0000	32	24	1.03	0.96	1.35
CM015574.1_RaGOO	1501000	43054107	0	0	0.0000	32	26	1.03	1.06	1.23
CM015574.1_RaGOO	1502000	43054107	0	0	0.0000	26	21	0.85	0.86	1.23
CM015574.1_RaGOO	1503000	43054107	0	0	0.0000	27	19	0.86	0.79	1.37
CM015574.1_RaGOO	1504000	43054107	0	0	0.0000	26	21	0.83	0.84	1.23
CM015574.1_RaGOO	1505000	43054107	0	0	0.0264	29	23	0.95	0.93	1.28
CM015574.1_RaGOO	1506000	43054107	0	0	0.0000	34	21	1.09	0.85	1.62
CM015574.1_RaGOO	1507000	43054107	0	0	0.0231	31	22	1.02	0.87	1.46
CM015574.1_RaGOO	1508000	43054107	0	0	0.0000	36	23	1.15	0.95	1.53
CM015574.1_RaGOO	1509000	43054107	0	0	0.0000	26	23	0.83	0.95	1.11
CM015574.1_RaGOO	1510000	43054107	0	0	0.0000	27	24	0.87	0.98	1.12
CM015574.1_RaGOO	1511000	43054107	0	0	0.0000	28	26	0.90	1.06	1.06
CM015574.1_RaGOO	1512000	43054107	0	0	0.0000	28	20	0.90	0.82	1.39
CM015574.1_RaGOO	1513000	43054107	0	0	0.0000	20	18	0.65	0.72	1.14
CM015574.1_RaGOO	1514000	43054107	0	0	0.0000	23	21	0.73	0.86	1.07
CM015574.1_RaGOO	1515000	43054107	0	0	0.0000	30	19	0.97	0.79	1.55
CM015574.1_RaGOO	1516000	43054107	0	0	0.0000	26	24	0.84	0.97	1.10
CM015574.1_RaGOO	1517000	43054107	0	0	0.0000	26	21	0.84	0.86	1.23
CM015574.1_RaGOO	1518000	43054107	0	0	0.0000	42	25	1.37	1.00	1.72
CM015574.1_RaGOO	1519000	43054107	0	0	0.0224	33	28	1.08	1.15	1.18
CM015574.1_RaGOO	1520000	43054107	0	0	0.0000	34	25	1.11	1.00	1.40
CM015574.1_RaGOO	1521000	43054107	0	0	0.0000	21	20	0.67	0.79	1.07
CM015574.1_RaGOO	1522000	43054107	0	0	0.0000	25	26	0.79	1.05	0.95
CM015574.1_RaGOO	1523000	43054107	0	0	0.0000	33	26	1.08	1.06	1.28
CM015574.1_RaGOO	1524000	43054107	0	0	0.0000	32	24	1.02	0.99	1.29
CM015574.1_RaGOO	1525000	43054107	0	0	0.0000	33	24	1.05	0.99	1.34
CM015574.1_RaGOO	1526000	43054107	0	0	0.0000	33	28	1.08	1.13	1.20
CM015574.1_RaGOO	1527000	43054107	26	0	0.0236	31	28	0.98	1.13	1.10
CM015574.1_RaGOO	1528000	43054107	0	0	0.0000	32	28	1.05	1.13	1.16
CM015574.1_RaGOO	1529000	43054107	0	0	0.0000	19	13	0.62	0.51	1.53
CM015574.1_RaGOO	1530000	43054107	0	0	0.0000	24	17	0.79	0.70	1.42
CM015574.1_RaGOO	1531000	43054107	0	0	0.0000	21	19	0.68	0.79	1.08
CM015574.1_RaGOO	1532000	43054107	0	1	0.0000	19	17	0.63	0.68	1.16
CM015574.1_RaGOO	1533000	43054107	0	0	0.0000	23	18	0.75	0.71	1.32
CM015574.1_RaGOO	1534000	43054107	0	0	0.0000	20	15	0.64	0.62	1.31
CM015574.1_RaGOO	1535000	43054107	0	0	0.0000	26	23	0.84	0.95	1.11
CM015574.1_RaGOO	1536000	43054107	0	0	0.0000	26	24	0.83	0.96	1.08
CM015574.1_RaGOO	1537000	43054107	0	0	0.0000	25	19	0.80	0.78	1.30
CM015574.1_RaGOO	1538000	43054107	0	0	0.0000	25	17	0.81	0.67	1.51
CM015574.1_RaGOO	1539000	43054107	0	0	0.0000	23	19	0.75	0.77	1.23
CM015574.1_RaGOO	1540000	43054107	0	0	0.0000	25	20	0.81	0.80	1.28
CM015574.1_RaGOO	1541000	43054107	0	0	0.0000	31	21	1.00	0.85	1.48
CM015574.1_RaGOO	1542000	43054107	0	0	0.0000	26	19	0.85	0.76	1.41
CM015574.1_RaGOO	1543000	43054107	0	0	0.0798	28	24	0.90	0.96	1.18
CM015574.1_RaGOO	1544000	43054107	1	0	0.0000	31	19	0.99	0.79	1.59
CM015574.1_RaGOO	1545000	43054107	0	0	0.0000	27	25	0.87	1.04	1.06
CM015574.1_RaGOO	1546000	43054107	0	0	0.0000	28	25	0.91	1.03	1.11
CM015574.1_RaGOO	1547000	43054107	0	0	0.0000	31	20	1.02	0.83	1.55
CM015574.1_RaGOO	1548000	43054107	0	0	0.0445	32	24	1.04	0.97	1.36
CM015574.1_RaGOO	1549000	43054107	0	0	0.0000	36	25	1.15	1.00	1.45
CM015574.1_RaGOO	1550000	43054107	0	0	0.0000	30	24	0.96	0.98	1.23
CM015574.1_RaGOO	1551000	43054107	0	0	0.0000	30	22	0.96	0.90	1.34
CM015574.1_RaGOO	1552000	43054107	0	0	0.0014	33	25	1.06	1.02	1.31
CM015574.1_RaGOO	1553000	43054107	0	0	0.0000	39	30	1.27	1.23	1.30
CM015574.1_RaGOO	1554000	43054107	0	0	0.0000	33	24	1.08	0.99	1.36
CM015574.1_RaGOO	1555000	43054107	0	0	0.0000	25	21	0.80	0.86	1.17
CM015574.1_RaGOO	1556000	43054107	0	0	0.0000	24	18	0.77	0.71	1.36
CM015574.1_RaGOO	1557000	43054107	0	0	0.0000	24	18	0.77	0.73	1.32
CM015574.1_RaGOO	1558000	43054107	0	0	0.0000	28	21	0.89	0.86	1.30
CM015574.1_RaGOO	1559000	43054107	0	0	0.0000	45	31	1.44	1.26	1.44
CM015574.1_RaGOO	1560000	43054107	0	0	0.0000	28	22	0.91	0.91	1.26
CM015574.1_RaGOO	1561000	43054107	0	0	0.0467	28	21	0.92	0.87	1.33
CM015574.1_RaGOO	1562000	43054107	0	0	0.0000	27	22	0.87	0.89	1.23
CM015574.1_RaGOO	1563000	43054107	0	0	0.0000	29	26	0.94	1.05	1.12
CM015574.1_RaGOO	1564000	43054107	0	0	0.0000	28	20	0.91	0.81	1.42
CM015574.1_RaGOO	1565000	43054107	0	0	0.0000	29	20	0.95	0.81	1.47
CM015574.1_RaGOO	1566000	43054107	0	0	0.0000	27	19	0.86	0.79	1.38
CM015574.1_RaGOO	1567000	43054107	0	0	0.0000	33	27	1.05	1.10	1.20
CM015574.1_RaGOO	1568000	43054107	0	0	0.0000	21	19	0.68	0.77	1.11
CM015574.1_RaGOO	1569000	43054107	0	0	0.0000	28	23	0.90	0.95	1.20
CM015574.1_RaGOO	1570000	43054107	1	0	0.0000	20	18	0.66	0.74	1.11
CM015574.1_RaGOO	1571000	43054107	0	0	0.0000	27	19	0.87	0.79	1.39
CM015574.1_RaGOO	1572000	43054107	0	0	0.0000	24	17	0.78	0.70	1.41
CM015574.1_RaGOO	1573000	43054107	0	1	0.0000	28	23	0.89	0.93	1.21
CM015574.1_RaGOO	1574000	43054107	0	0	0.0000	29	24	0.95	0.99	1.20
CM015574.1_RaGOO	1575000	43054107	0	0	0.0000	25	18	0.80	0.73	1.37
CM015574.1_RaGOO	1576000	43054107	0	0	0.0000	26	24	0.84	0.99	1.07
CM015574.1_RaGOO	1577000	43054107	0	0	0.0000	31	29	1.00	1.17	1.08
CM015574.1_RaGOO	1578000	43054107	0	0	0.0000	32	28	1.02	1.16	1.11
CM015574.1_RaGOO	1579000	43054107	0	0	0.0000	31	25	1.00	1.02	1.23
CM015574.1_RaGOO	1580000	43054107	1	0	0.0000	28	18	0.91	0.75	1.53
CM015574.1_RaGOO	1581000	43054107	0	0	0.0000	17	19	0.54	0.77	0.89
CM015574.1_RaGOO	1582000	43054107	0	0	0.0000	30	20	0.97	0.80	1.54
CM015574.1_RaGOO	1583000	43054107	0	0	0.0000	41	30	1.32	1.21	1.37
CM015574.1_RaGOO	1584000	43054107	0	0	0.0000	34	24	1.10	0.97	1.44
CM015574.1_RaGOO	1585000	43054107	0	0	0.0265	32	24	1.03	0.97	1.34
CM015574.1_RaGOO	1586000	43054107	0	0	0.0049	35	26	1.13	1.05	1.36
CM015574.1_RaGOO	1587000	43054107	0	0	0.0000	26	20	0.83	0.80	1.31
CM015574.1_RaGOO	1588000	43054107	0	0	0.0000	26	18	0.83	0.74	1.40
CM015574.1_RaGOO	1589000	43054107	0	0	0.0000	28	22	0.89	0.90	1.24
CM015574.1_RaGOO	1590000	43054107	0	0	0.0000	24	17	0.79	0.69	1.44
CM015574.1_RaGOO	1591000	43054107	0	2	0.0000	33	31	1.05	1.26	1.06
CM015574.1_RaGOO	1592000	43054107	0	0	0.0000	19	15	0.60	0.62	1.23
CM015574.1_RaGOO	1593000	43054107	0	0	0.0000	20	17	0.64	0.71	1.15
CM015574.1_RaGOO	1594000	43054107	0	0	0.0000	19	17	0.60	0.69	1.09
CM015574.1_RaGOO	1595000	43054107	0	1	0.0000	19	16	0.60	0.66	1.15
CM015574.1_RaGOO	1596000	43054107	0	0	0.0000	17	14	0.54	0.57	1.18
CM015574.1_RaGOO	1597000	43054107	0	0	0.0000	22	18	0.71	0.74	1.22
CM015574.1_RaGOO	1598000	43054107	0	0	0.0000	24	18	0.79	0.74	1.35
CM015574.1_RaGOO	1599000	43054107	0	1	0.0271	20	18	0.64	0.75	1.07
CM015574.1_RaGOO	1600000	43054107	0	0	0.0000	21	14	0.68	0.57	1.49
CM015574.1_RaGOO	1601000	43054107	0	0	0.0000	25	19	0.82	0.79	1.30
CM015574.1_RaGOO	1602000	43054107	0	0	0.0000	29	23	0.92	0.93	1.25
CM015574.1_RaGOO	1603000	43054107	0	0	0.0000	25	22	0.80	0.89	1.13
CM015574.1_RaGOO	1604000	43054107	0	0	0.0661	26	25	0.84	1.04	1.02
CM015574.1_RaGOO	1605000	43054107	0	0	0.0000	37	29	1.18	1.17	1.28
CM015574.1_RaGOO	1606000	43054107	0	0	0.0000	38	24	1.21	0.97	1.57
CM015574.1_RaGOO	1607000	43054107	0	0	0.0201	42	30	1.35	1.21	1.40
CM015574.1_RaGOO	1608000	43054107	5	0	0.0643	33	23	1.06	0.95	1.40
CM015574.1_RaGOO	1609000	43054107	0	0	0.0000	27	20	0.87	0.82	1.34
CM015574.1_RaGOO	1610000	43054107	1	0	0.0000	33	31	1.05	1.26	1.05
CM015574.1_RaGOO	1611000	43054107	0	0	0.0962	37	28	1.18	1.15	1.29
CM015574.1_RaGOO	1612000	43054107	0	0	0.0000	32	24	1.04	0.96	1.36
CM015574.1_RaGOO	1613000	43054107	0	0	0.0000	28	20	0.90	0.80	1.41
CM015574.1_RaGOO	1614000	43054107	0	0	0.0027	29	24	0.92	0.98	1.19
CM015574.1_RaGOO	1615000	43054107	0	0	0.0000	27	19	0.87	0.79	1.40
CM015574.1_RaGOO	1616000	43054107	0	0	0.0000	25	20	0.80	0.81	1.23
CM015574.1_RaGOO	1617000	43054107	0	0	0.0000	31	26	1.01	1.07	1.19
CM015574.1_RaGOO	1618000	43054107	0	0	0.0000	23	18	0.73	0.72	1.27
CM015574.1_RaGOO	1619000	43054107	0	0	0.0000	21	17	0.69	0.70	1.24
CM015574.1_RaGOO	1620000	43054107	0	0	0.0000	23	19	0.75	0.79	1.20
CM015574.1_RaGOO	1621000	43054107	0	0	0.0000	28	27	0.92	1.12	1.03
CM015574.1_RaGOO	1622000	43054107	0	0	0.0000	25	21	0.82	0.87	1.19
CM015574.1_RaGOO	1623000	43054107	0	0	0.0000	26	17	0.83	0.70	1.51
CM015574.1_RaGOO	1624000	43054107	0	0	0.0000	19	13	0.62	0.53	1.46
CM015574.1_RaGOO	1625000	43054107	2	0	0.0000	26	18	0.84	0.74	1.42
CM015574.1_RaGOO	1626000	43054107	0	0	0.0000	31	23	1.01	0.92	1.38
CM015574.1_RaGOO	1627000	43054107	0	0	0.0000	23	15	0.74	0.62	1.50
CM015574.1_RaGOO	1628000	43054107	0	0	0.0000	25	17	0.80	0.70	1.44
CM015574.1_RaGOO	1629000	43054107	0	0	0.0000	31	22	1.00	0.87	1.44
CM015574.1_RaGOO	1630000	43054107	0	0	0.0000	32	28	1.04	1.15	1.14
CM015574.1_RaGOO	1631000	43054107	0	0	0.0000	38	30	1.21	1.22	1.25
CM015574.1_RaGOO	1632000	43054107	0	0	0.0000	28	27	0.90	1.10	1.03
CM015574.1_RaGOO	1633000	43054107	0	0	0.0000	31	23	0.99	0.95	1.31
CM015574.1_RaGOO	1634000	43054107	0	0	0.0000	38	25	1.22	1.02	1.51
CM015574.1_RaGOO	1635000	43054107	0	0	0.0000	43	30	1.39	1.22	1.43
CM015574.1_RaGOO	1636000	43054107	0	0	0.0014	30	23	0.97	0.95	1.30
CM015574.1_RaGOO	1637000	43054107	0	0	0.0000	23	19	0.74	0.76	1.24
CM015574.1_RaGOO	1638000	43054107	0	0	0.0000	31	27	0.99	1.10	1.13
CM015574.1_RaGOO	1639000	43054107	0	0	0.0000	29	24	0.93	0.98	1.20
CM015574.1_RaGOO	1640000	43054107	0	0	0.0105	34	25	1.11	1.03	1.36
CM015574.1_RaGOO	1641000	43054107	0	0	0.0000	30	25	0.98	1.00	1.24
CM015574.1_RaGOO	1642000	43054107	1	0	0.0000	26	20	0.85	0.81	1.32
CM015574.1_RaGOO	1643000	43054107	0	0	0.0000	28	22	0.91	0.89	1.28
CM015574.1_RaGOO	1644000	43054107	0	0	0.0000	25	21	0.82	0.87	1.19
CM015574.1_RaGOO	1645000	43054107	0	0	0.0000	24	24	0.77	0.97	1.00
CM015574.1_RaGOO	1646000	43054107	0	0	0.0000	21	17	0.68	0.70	1.22
CM015574.1_RaGOO	1647000	43054107	0	0	0.0000	23	21	0.74	0.86	1.09
CM015574.1_RaGOO	1648000	43054107	0	0	0.0000	25	21	0.81	0.86	1.19
CM015574.1_RaGOO	1649000	43054107	0	0	0.0000	20	22	0.65	0.88	0.93
CM015574.1_RaGOO	1650000	43054107	0	0	0.0000	26	16	0.85	0.67	1.61
CM015574.1_RaGOO	1651000	43054107	0	0	0.0000	23	20	0.74	0.81	1.14
CM015574.1_RaGOO	1652000	43054107	0	0	0.0000	26	23	0.85	0.92	1.16
CM015574.1_RaGOO	1653000	43054107	0	0	0.0000	28	20	0.89	0.80	1.42
CM015574.1_RaGOO	1654000	43054107	0	0	0.0000	23	21	0.75	0.85	1.11
CM015574.1_RaGOO	1655000	43054107	1	0	0.0000	22	17	0.70	0.71	1.25
CM015574.1_RaGOO	1656000	43054107	0	0	0.0000	29	25	0.94	1.03	1.14
CM015574.1_RaGOO	1657000	43054107	0	0	0.0000	32	24	1.03	0.96	1.36
CM015574.1_RaGOO	1658000	43054107	0	0	0.0000	27	24	0.87	0.97	1.13
CM015574.1_RaGOO	1659000	43054107	0	0	0.0000	25	24	0.80	0.98	1.03
CM015574.1_RaGOO	1660000	43054107	0	0	0.0000	27	20	0.88	0.81	1.36
CM015574.1_RaGOO	1661000	43054107	0	6	0.0000	34	25	1.09	1.02	1.34
CM015574.1_RaGOO	1662000	43054107	0	2	0.0000	22	18	0.71	0.72	1.24
CM015574.1_RaGOO	1663000	43054107	0	0	0.0000	25	19	0.80	0.78	1.30
CM015574.1_RaGOO	1664000	43054107	0	0	0.0000	28	18	0.89	0.74	1.52
CM015574.1_RaGOO	1665000	43054107	0	1	0.0000	22	19	0.71	0.77	1.15
CM015574.1_RaGOO	1666000	43054107	0	0	0.0000	22	24	0.71	0.96	0.94
CM015574.1_RaGOO	1667000	43054107	0	0	0.0000	26	23	0.83	0.94	1.11
CM015574.1_RaGOO	1668000	43054107	0	0	0.0000	22	18	0.71	0.74	1.22
CM015574.1_RaGOO	1669000	43054107	0	0	0.0000	35	32	1.14	1.29	1.11
CM015574.1_RaGOO	1670000	43054107	0	0	0.0117	28	25	0.91	1.01	1.13
CM015574.1_RaGOO	1671000	43054107	0	0	0.0000	25	24	0.80	0.97	1.04
CM015574.1_RaGOO	1672000	43054107	0	0	0.0000	26	23	0.83	0.93	1.12
CM015574.1_RaGOO	1673000	43054107	0	0	0.0034	27	21	0.86	0.85	1.27
CM015574.1_RaGOO	1674000	43054107	0	0	0.0000	22	20	0.72	0.83	1.10
CM015574.1_RaGOO	1675000	43054107	0	0	0.0000	33	26	1.08	1.07	1.27
CM015574.1_RaGOO	1676000	43054107	0	0	0.0000	22	20	0.71	0.81	1.11
CM015574.1_RaGOO	1677000	43054107	0	1	0.0000	23	19	0.75	0.79	1.21
CM015574.1_RaGOO	1678000	43054107	0	0	0.0000	30	21	0.96	0.86	1.40
CM015574.1_RaGOO	1679000	43054107	0	0	0.0000	26	22	0.84	0.91	1.16
CM015574.1_RaGOO	1680000	43054107	0	0	0.0000	34	27	1.10	1.11	1.25
CM015574.1_RaGOO	1681000	43054107	0	0	0.0000	33	28	1.07	1.12	1.20
CM015574.1_RaGOO	1682000	43054107	0	0	0.0000	24	15	0.76	0.59	1.61
CM015574.1_RaGOO	1683000	43054107	0	0	0.0000	28	18	0.90	0.73	1.55
CM015574.1_RaGOO	1684000	43054107	0	0	0.0374	19	17	0.63	0.68	1.16
CM015574.1_RaGOO	1685000	43054107	0	0	0.0000	39	32	1.27	1.28	1.25
CM015574.1_RaGOO	1686000	43054107	0	0	0.0000	40	26	1.29	1.04	1.57
CM015574.1_RaGOO	1687000	43054107	0	0	0.0000	31	24	1.00	0.96	1.31
CM015574.1_RaGOO	1688000	43054107	0	0	0.0000	26	22	0.84	0.87	1.22
CM015574.1_RaGOO	1689000	43054107	0	0	0.0000	22	21	0.71	0.85	1.05
CM015574.1_RaGOO	1690000	43054107	0	0	0.0000	25	20	0.82	0.80	1.29
CM015574.1_RaGOO	1691000	43054107	0	0	0.0000	26	23	0.84	0.92	1.15
CM015574.1_RaGOO	1692000	43054107	0	0	0.0000	21	19	0.69	0.78	1.11
CM015574.1_RaGOO	1693000	43054107	0	0	0.0000	30	21	0.95	0.84	1.43
CM015574.1_RaGOO	1694000	43054107	0	0	0.0000	28	24	0.91	0.99	1.16
CM015574.1_RaGOO	1695000	43054107	0	0	0.0000	26	17	0.85	0.70	1.52
CM015574.1_RaGOO	1696000	43054107	0	0	0.0000	18	16	0.59	0.67	1.12
CM015574.1_RaGOO	1697000	43054107	0	0	0.0000	26	22	0.84	0.91	1.16
CM015574.1_RaGOO	1698000	43054107	0	0	0.0000	41	29	1.31	1.16	1.42
CM015574.1_RaGOO	1699000	43054107	0	0	0.0000	30	28	0.98	1.14	1.08
CM015574.1_RaGOO	1700000	43054107	0	0	0.0055	23	18	0.74	0.74	1.26
CM015574.1_RaGOO	1701000	43054107	0	0	0.0000	29	27	0.94	1.08	1.10
CM015574.1_RaGOO	1702000	43054107	0	0	0.0000	28	22	0.91	0.91	1.26
CM015574.1_RaGOO	1703000	43054107	0	0	0.0000	27	23	0.88	0.92	1.21
CM015574.1_RaGOO	1704000	43054107	0	0	0.0000	21	15	0.68	0.60	1.43
CM015574.1_RaGOO	1705000	43054107	0	0	0.0000	23	16	0.75	0.64	1.49
CM015574.1_RaGOO	1706000	43054107	0	0	0.0000	28	25	0.90	1.03	1.11
CM015574.1_RaGOO	1707000	43054107	0	0	0.0000	27	19	0.87	0.77	1.43
CM015574.1_RaGOO	1708000	43054107	0	0	0.0000	31	28	1.01	1.12	1.14
CM015574.1_RaGOO	1709000	43054107	0	0	0.0000	29	14	0.92	0.58	1.99
CM015574.1_RaGOO	1710000	43054107	0	0	0.0000	33	23	1.06	0.92	1.46
CM015574.1_RaGOO	1711000	43054107	0	0	0.0000	30	26	0.98	1.05	1.18
CM015574.1_RaGOO	1712000	43054107	0	0	0.0000	43	30	1.39	1.21	1.45
CM015574.1_RaGOO	1713000	43054107	0	1	0.0000	20	19	0.64	0.77	1.05
CM015574.1_RaGOO	1714000	43054107	0	0	0.0000	23	20	0.75	0.81	1.18
CM015574.1_RaGOO	1715000	43054107	0	0	0.0000	29	20	0.93	0.79	1.47
CM015574.1_RaGOO	1716000	43054107	2	0	0.0000	26	20	0.85	0.83	1.29
CM015574.1_RaGOO	1717000	43054107	0	0	0.0000	39	39	1.26	1.59	1.00
CM015574.1_RaGOO	1718000	43054107	1	0	0.0000	26	23	0.83	0.93	1.12
CM015574.1_RaGOO	1719000	43054107	0	0	0.0000	27	23	0.87	0.93	1.18
CM015574.1_RaGOO	1720000	43054107	0	0	0.0452	33	22	1.06	0.88	1.51
CM015574.1_RaGOO	1721000	43054107	0	0	0.0000	32	21	1.03	0.87	1.50
CM015574.1_RaGOO	1722000	43054107	0	0	0.0000	26	24	0.85	0.96	1.11
CM015574.1_RaGOO	1723000	43054107	0	0	0.0000	31	24	0.99	0.97	1.29
CM015574.1_RaGOO	1724000	43054107	0	0	0.0000	30	26	0.96	1.05	1.15
CM015574.1_RaGOO	1725000	43054107	0	0	0.0000	38	32	1.23	1.30	1.19
CM015574.1_RaGOO	1726000	43054107	0	0	0.0000	34	21	1.10	0.86	1.60
CM015574.1_RaGOO	1727000	43054107	0	0	0.0000	31	29	1.00	1.19	1.07
CM015574.1_RaGOO	1728000	43054107	0	0	0.0000	31	25	1.01	1.03	1.24
CM015574.1_RaGOO	1729000	43054107	0	0	0.0000	30	29	0.98	1.18	1.04
CM015574.1_RaGOO	1730000	43054107	0	0	0.0000	28	24	0.90	0.96	1.18
CM015574.1_RaGOO	1731000	43054107	0	0	0.0000	30	22	0.95	0.88	1.37
CM015574.1_RaGOO	1732000	43054107	0	0	0.0000	27	23	0.87	0.92	1.19
CM015574.1_RaGOO	1733000	43054107	0	0	0.0000	34	26	1.11	1.04	1.34
CM015574.1_RaGOO	1734000	43054107	0	0	0.0000	27	21	0.86	0.84	1.30
CM015574.1_RaGOO	1735000	43054107	0	0	0.0000	29	23	0.95	0.93	1.29
CM015574.1_RaGOO	1736000	43054107	0	0	0.0000	38	26	1.22	1.05	1.47
CM015574.1_RaGOO	1737000	43054107	0	0	0.0000	27	26	0.87	1.07	1.02
CM015574.1_RaGOO	1738000	43054107	0	0	0.0000	26	26	0.85	1.04	1.03
CM015574.1_RaGOO	1739000	43054107	0	0	0.0000	34	23	1.10	0.92	1.50
CM015574.1_RaGOO	1740000	43054107	0	0	0.0000	31	25	1.00	1.01	1.24
CM015574.1_RaGOO	1741000	43054107	0	0	0.0000	33	25	1.07	1.04	1.30
CM015574.1_RaGOO	1742000	43054107	0	0	0.0000	26	25	0.84	1.03	1.03
CM015574.1_RaGOO	1743000	43054107	0	0	0.0000	41	31	1.32	1.25	1.33
CM015574.1_RaGOO	1744000	43054107	0	0	0.0000	35	28	1.12	1.14	1.24
CM015574.1_RaGOO	1745000	43054107	0	0	0.0000	41	31	1.32	1.28	1.30
CM015574.1_RaGOO	1746000	43054107	0	0	0.0000	33	25	1.08	1.01	1.34
CM015574.1_RaGOO	1747000	43054107	0	0	0.0000	32	24	1.04	0.96	1.37
CM015574.1_RaGOO	1748000	43054107	0	0	0.0000	38	28	1.21	1.16	1.32
CM015574.1_RaGOO	1749000	43054107	0	0	0.0000	25	18	0.81	0.73	1.39
CM015574.1_RaGOO	1750000	43054107	0	0	0.0000	31	22	1.01	0.91	1.40
CM015574.1_RaGOO	1751000	43054107	0	0	0.0452	24	20	0.76	0.81	1.18
CM015574.1_RaGOO	1752000	43054107	0	0	0.0000	28	27	0.90	1.11	1.03
CM015574.1_RaGOO	1753000	43054107	0	0	0.0000	28	24	0.91	0.98	1.17
CM015574.1_RaGOO	1754000	43054107	0	0	0.0198	32	19	1.04	0.79	1.65
CM015574.1_RaGOO	1755000	43054107	0	0	0.0000	30	20	0.98	0.83	1.48
CM015574.1_RaGOO	1756000	43054107	0	0	0.0000	28	24	0.89	0.98	1.15
CM015574.1_RaGOO	1757000	43054107	0	0	0.0000	25	24	0.80	0.98	1.03
CM015574.1_RaGOO	1758000	43054107	0	0	0.0000	27	23	0.88	0.92	1.21
CM015574.1_RaGOO	1759000	43054107	0	0	0.0670	30	20	0.95	0.81	1.48
CM015574.1_RaGOO	1760000	43054107	0	0	0.0000	35	27	1.11	1.11	1.26
CM015574.1_RaGOO	1761000	43054107	0	0	0.0000	27	17	0.87	0.68	1.62
CM015574.1_RaGOO	1762000	43054107	0	0	0.0000	24	20	0.77	0.80	1.22
CM015574.1_RaGOO	1763000	43054107	0	0	0.0000	25	22	0.81	0.89	1.15
CM015574.1_RaGOO	1764000	43054107	0	0	0.0000	38	34	1.24	1.39	1.12
CM015574.1_RaGOO	1765000	43054107	0	0	0.0000	48	37	1.54	1.52	1.28
CM015574.1_RaGOO	1766000	43054107	0	0	0.0000	25	17	0.82	0.67	1.53
CM015574.1_RaGOO	1767000	43054107	0	0	0.0000	24	25	0.78	1.01	0.96
CM015574.1_RaGOO	1768000	43054107	0	0	0.0000	26	22	0.83	0.88	1.18
CM015574.1_RaGOO	1769000	43054107	0	0	0.0000	27	19	0.86	0.77	1.41
CM015574.1_RaGOO	1770000	43054107	0	0	0.0000	28	14	0.91	0.55	2.08
CM015574.1_RaGOO	1771000	43054107	0	0	0.0000	67	50	2.15	2.04	1.33
CM015574.1_RaGOO	1772000	43054107	0	0	0.0000	29	25	0.92	1.03	1.13
CM015574.1_RaGOO	1773000	43054107	0	0	0.0000	26	22	0.83	0.88	1.19
CM015574.1_RaGOO	1774000	43054107	0	0	0.0000	28	24	0.91	0.96	1.19
CM015574.1_RaGOO	1775000	43054107	0	0	0.0024	44	36	1.42	1.46	1.23
CM015574.1_RaGOO	1776000	43054107	0	0	0.0000	31	22	0.98	0.89	1.40
CM015574.1_RaGOO	1777000	43054107	2	0	0.0000	36	26	1.17	1.05	1.40
CM015574.1_RaGOO	1778000	43054107	0	0	0.0000	30	24	0.96	0.99	1.23
CM015574.1_RaGOO	1779000	43054107	0	0	0.0000	31	28	0.99	1.15	1.09
CM015574.1_RaGOO	1780000	43054107	0	0	0.0000	34	20	1.10	0.80	1.73
CM015574.1_RaGOO	1781000	43054107	1	0	0.0000	32	24	1.02	0.96	1.33
CM015574.1_RaGOO	1782000	43054107	0	1	0.0000	35	30	1.12	1.22	1.16
CM015574.1_RaGOO	1783000	43054107	0	0	0.0000	38	32	1.21	1.29	1.18
CM015574.1_RaGOO	1784000	43054107	0	0	0.0000	32	29	1.02	1.20	1.08
CM015574.1_RaGOO	1785000	43054107	0	0	0.0000	32	24	1.02	0.99	1.31
CM015574.1_RaGOO	1786000	43054107	0	0	0.0000	34	19	1.09	0.79	1.74
CM015574.1_RaGOO	1787000	43054107	0	0	0.0000	33	14	1.07	0.57	2.37
CM015574.1_RaGOO	1788000	43054107	0	0	0.0000	37	19	1.20	0.79	1.91
CM015574.1_RaGOO	1789000	43054107	1	0	0.0000	28	18	0.91	0.75	1.54
CM015574.1_RaGOO	1790000	43054107	0	0	0.0000	27	23	0.86	0.92	1.17
CM015574.1_RaGOO	1791000	43054107	0	0	0.0000	29	18	0.95	0.73	1.65
CM015574.1_RaGOO	1792000	43054107	0	0	0.0000	28	27	0.89	1.11	1.01
CM015574.1_RaGOO	1793000	43054107	0	0	0.0000	30	22	0.98	0.88	1.41
CM015574.1_RaGOO	1794000	43054107	0	0	0.0000	27	17	0.88	0.71	1.58
CM015574.1_RaGOO	1795000	43054107	0	0	0.0000	27	18	0.88	0.72	1.53
CM015574.1_RaGOO	1796000	43054107	0	0	0.0057	26	18	0.84	0.72	1.46
CM015574.1_RaGOO	1797000	43054107	0	0	0.0000	52	34	1.69	1.37	1.55
CM015574.1_RaGOO	1798000	43054107	0	0	0.0000	37	31	1.19	1.27	1.18
CM015574.1_RaGOO	1799000	43054107	0	0	0.0000	31	27	0.99	1.09	1.14
CM015574.1_RaGOO	1800000	43054107	0	0	0.0000	35	25	1.13	1.02	1.39
CM015574.1_RaGOO	1801000	43054107	0	0	0.0000	31	23	1.01	0.95	1.35
CM015574.1_RaGOO	1802000	43054107	0	0	0.0000	28	24	0.89	0.96	1.17
CM015574.1_RaGOO	1803000	43054107	0	0	0.0000	33	25	1.06	1.02	1.31
CM015574.1_RaGOO	1804000	43054107	0	0	0.0000	31	23	1.01	0.93	1.38
CM015574.1_RaGOO	1805000	43054107	0	0	0.0000	25	22	0.82	0.91	1.13
CM015574.1_RaGOO	1806000	43054107	0	0	0.0000	28	24	0.91	0.96	1.21
CM015574.1_RaGOO	1807000	43054107	0	0	0.0000	27	22	0.87	0.89	1.24
CM015574.1_RaGOO	1808000	43054107	0	0	0.0000	29	23	0.93	0.94	1.25
CM015574.1_RaGOO	1809000	43054107	0	0	0.0000	39	30	1.27	1.22	1.32
CM015574.1_RaGOO	1810000	43054107	0	0	0.0000	35	29	1.13	1.17	1.22
CM015574.1_RaGOO	1811000	43054107	0	0	0.0000	35	31	1.13	1.24	1.15
CM015574.1_RaGOO	1812000	43054107	0	0	0.0000	41	36	1.31	1.48	1.11
CM015574.1_RaGOO	1813000	43054107	0	0	0.0000	27	25	0.88	1.00	1.11
CM015574.1_RaGOO	1814000	43054107	0	0	0.0000	27	25	0.87	1.01	1.08
CM015574.1_RaGOO	1815000	43054107	0	0	0.0000	30	25	0.96	1.03	1.18
CM015574.1_RaGOO	1816000	43054107	0	2	0.0000	27	21	0.88	0.85	1.31
CM015574.1_RaGOO	1817000	43054107	0	0	0.0000	32	23	1.03	0.94	1.39
CM015574.1_RaGOO	1818000	43054107	0	0	0.0122	30	23	0.98	0.92	1.33
CM015574.1_RaGOO	1819000	43054107	0	0	0.0000	31	25	1.01	1.03	1.24
CM015574.1_RaGOO	1820000	43054107	0	0	0.0000	41	24	1.33	0.98	1.71
CM015574.1_RaGOO	1821000	43054107	0	0	0.0000	33	19	1.05	0.77	1.73
CM015574.1_RaGOO	1822000	43054107	0	0	0.0000	31	26	1.01	1.04	1.22
CM015574.1_RaGOO	1823000	43054107	0	0	0.0441	31	25	1.01	1.02	1.25
CM015574.1_RaGOO	1824000	43054107	0	0	0.0000	27	21	0.87	0.86	1.27
CM015574.1_RaGOO	1825000	43054107	0	0	0.0000	30	27	0.95	1.08	1.11
CM015574.1_RaGOO	1826000	43054107	0	0	0.0000	28	26	0.92	1.04	1.11
CM015574.1_RaGOO	1827000	43054107	0	0	0.0000	29	24	0.92	0.99	1.17
CM015574.1_RaGOO	1828000	43054107	0	0	0.0000	35	23	1.12	0.93	1.52
CM015574.1_RaGOO	1829000	43054107	0	0	0.0000	36	25	1.15	1.01	1.43
CM015574.1_RaGOO	1830000	43054107	0	0	0.0000	35	28	1.12	1.14	1.24
CM015574.1_RaGOO	1831000	43054107	0	0	0.0000	28	25	0.91	1.02	1.13
CM015574.1_RaGOO	1832000	43054107	0	0	0.0000	31	25	1.02	1.00	1.28
CM015574.1_RaGOO	1833000	43054107	0	0	0.0000	29	24	0.93	0.97	1.21
CM015574.1_RaGOO	1834000	43054107	0	0	0.0000	32	20	1.04	0.82	1.60
CM015574.1_RaGOO	1835000	43054107	0	0	0.0000	20	19	0.63	0.76	1.05
CM015574.1_RaGOO	1836000	43054107	0	0	0.0000	27	20	0.88	0.83	1.33
CM015574.1_RaGOO	1837000	43054107	0	0	0.0000	23	20	0.75	0.80	1.17
CM015574.1_RaGOO	1838000	43054107	0	0	0.0000	27	23	0.87	0.92	1.20
CM015574.1_RaGOO	1839000	43054107	0	0	0.0000	23	25	0.73	1.01	0.91
CM015574.1_RaGOO	1840000	43054107	0	0	0.0000	34	26	1.08	1.04	1.31
CM015574.1_RaGOO	1841000	43054107	0	0	0.0000	30	26	0.97	1.04	1.17
CM015574.1_RaGOO	1842000	43054107	0	0	0.0000	27	23	0.87	0.93	1.18
CM015574.1_RaGOO	1843000	43054107	0	0	0.0000	31	24	1.00	0.98	1.29
CM015574.1_RaGOO	1844000	43054107	0	0	0.0000	24	19	0.79	0.79	1.25
CM015574.1_RaGOO	1845000	43054107	0	0	0.0000	21	23	0.69	0.94	0.92
CM015574.1_RaGOO	1846000	43054107	0	0	0.0000	38	32	1.22	1.29	1.19
CM015574.1_RaGOO	1847000	43054107	0	0	0.0000	25	20	0.81	0.83	1.23
CM015574.1_RaGOO	1848000	43054107	0	0	0.0000	26	22	0.85	0.89	1.20
CM015574.1_RaGOO	1849000	43054107	0	0	0.0000	25	27	0.82	1.08	0.96
CM015574.1_RaGOO	1850000	43054107	0	0	0.0000	32	26	1.03	1.07	1.21
CM015574.1_RaGOO	1851000	43054107	0	0	0.0000	32	22	1.04	0.88	1.48
CM015574.1_RaGOO	1852000	43054107	0	0	0.0000	29	24	0.94	0.99	1.20
CM015574.1_RaGOO	1853000	43054107	0	0	0.0000	26	22	0.83	0.87	1.20
CM015574.1_RaGOO	1854000	43054107	0	0	0.0000	24	19	0.78	0.79	1.25
CM015574.1_RaGOO	1855000	43054107	0	0	0.0002	26	21	0.84	0.87	1.21
CM015574.1_RaGOO	1856000	43054107	0	1	0.0000	23	23	0.75	0.95	1.00
CM015574.1_RaGOO	1857000	43054107	2	0	0.0000	22	17	0.72	0.70	1.30
CM015574.1_RaGOO	1858000	43054107	0	0	0.0000	32	27	1.04	1.08	1.22
CM015574.1_RaGOO	1859000	43054107	0	0	0.0000	27	22	0.88	0.88	1.26
CM015574.1_RaGOO	1860000	43054107	0	0	0.0000	18	20	0.59	0.82	0.91
CM015574.1_RaGOO	1861000	43054107	0	0	0.0000	24	19	0.78	0.79	1.24
CM015574.1_RaGOO	1862000	43054107	0	0	0.0000	33	21	1.07	0.87	1.56
CM015574.1_RaGOO	1863000	43054107	0	0	0.0000	42	26	1.37	1.04	1.65
CM015574.1_RaGOO	1864000	43054107	0	0	0.0000	27	27	0.86	1.10	0.98
CM015574.1_RaGOO	1865000	43054107	0	0	0.0000	28	26	0.92	1.04	1.11
CM015574.1_RaGOO	1866000	43054107	0	0	0.0000	31	24	1.00	0.97	1.30
CM015574.1_RaGOO	1867000	43054107	0	2	0.0070	31	23	0.99	0.93	1.34
CM015574.1_RaGOO	1868000	43054107	0	0	0.0000	28	22	0.91	0.91	1.27
CM015574.1_RaGOO	1869000	43054107	0	0	0.0000	25	25	0.79	1.02	0.98
CM015574.1_RaGOO	1870000	43054107	0	0	0.0000	26	21	0.85	0.84	1.27
CM015574.1_RaGOO	1871000	43054107	0	0	0.0000	26	26	0.84	1.05	1.00
CM015574.1_RaGOO	1872000	43054107	0	0	0.0000	29	20	0.92	0.80	1.45
CM015574.1_RaGOO	1873000	43054107	0	0	0.0000	30	20	0.98	0.82	1.51
CM015574.1_RaGOO	1874000	43054107	0	0	0.0000	22	21	0.70	0.86	1.03
CM015574.1_RaGOO	1875000	43054107	0	0	0.0000	14	18	0.47	0.72	0.81
CM015574.1_RaGOO	1876000	43054107	0	0	0.0000	20	20	0.64	0.81	0.99
CM015574.1_RaGOO	1877000	43054107	0	0	0.0000	27	20	0.86	0.80	1.35
CM015574.1_RaGOO	1878000	43054107	3	0	0.0354	21	18	0.68	0.74	1.16
CM015574.1_RaGOO	1879000	43054107	0	0	0.0000	22	19	0.71	0.77	1.16
CM015574.1_RaGOO	1880000	43054107	0	0	0.0000	35	26	1.11	1.07	1.32
CM015574.1_RaGOO	1881000	43054107	0	0	0.0000	30	25	0.96	1.00	1.21
CM015574.1_RaGOO	1882000	43054107	0	0	0.0000	29	23	0.92	0.93	1.26
CM015574.1_RaGOO	1883000	43054107	0	0	0.0000	56	42	1.80	1.70	1.34
CM015574.1_RaGOO	1884000	43054107	0	0	0.0000	47	34	1.52	1.39	1.38
CM015574.1_RaGOO	1885000	43054107	0	0	0.0000	32	23	1.03	0.95	1.36
CM015574.1_RaGOO	1886000	43054107	0	0	0.0006	29	24	0.92	0.97	1.19
CM015574.1_RaGOO	1887000	43054107	0	0	0.0000	35	22	1.12	0.89	1.58
CM015574.1_RaGOO	1888000	43054107	0	0	0.0000	33	25	1.07	1.00	1.35
CM015574.1_RaGOO	1889000	43054107	0	0	0.0000	32	27	1.04	1.10	1.19
CM015574.1_RaGOO	1890000	43054107	0	0	0.0000	18	17	0.58	0.70	1.03
CM015574.1_RaGOO	1891000	43054107	0	0	0.0000	22	17	0.70	0.68	1.30
CM015574.1_RaGOO	1892000	43054107	0	0	0.0000	39	31	1.27	1.26	1.27
CM015574.1_RaGOO	1893000	43054107	0	0	0.0000	33	23	1.08	0.94	1.45
CM015574.1_RaGOO	1894000	43054107	0	0	0.0000	22	19	0.70	0.76	1.15
CM015574.1_RaGOO	1895000	43054107	0	0	0.0000	22	18	0.72	0.74	1.23
CM015574.1_RaGOO	1896000	43054107	0	0	0.0000	18	14	0.57	0.58	1.25
CM015574.1_RaGOO	1897000	43054107	0	0	0.0000	19	13	0.61	0.53	1.46
CM015574.1_RaGOO	1898000	43054107	0	0	0.0001	19	13	0.61	0.52	1.48
CM015574.1_RaGOO	1899000	43054107	1	0	0.0000	20	12	0.63	0.50	1.60
CM015574.1_RaGOO	1900000	43054107	0	0	0.0124	25	18	0.82	0.75	1.39
CM015574.1_RaGOO	1901000	43054107	0	0	0.0001	24	18	0.76	0.74	1.29
CM015574.1_RaGOO	1902000	43054107	0	0	0.0000	27	23	0.86	0.95	1.14
CM015574.1_RaGOO	1903000	43054107	0	0	0.0457	25	22	0.81	0.89	1.15
CM015574.1_RaGOO	1904000	43054107	8	0	0.0000	28	20	0.89	0.80	1.40
CM015574.1_RaGOO	1905000	43054107	0	0	0.0000	30	28	0.98	1.15	1.07
CM015574.1_RaGOO	1906000	43054107	0	0	0.0000	27	16	0.86	0.65	1.67
CM015574.1_RaGOO	1907000	43054107	0	0	0.0000	28	19	0.92	0.79	1.47
CM015574.1_RaGOO	1908000	43054107	0	0	0.0000	24	23	0.78	0.94	1.04
CM015574.1_RaGOO	1909000	43054107	0	0	0.0000	26	21	0.85	0.85	1.26
CM015574.1_RaGOO	1910000	43054107	0	0	0.0000	32	21	1.04	0.85	1.56
CM015574.1_RaGOO	1911000	43054107	0	0	0.0000	29	21	0.94	0.86	1.38
CM015574.1_RaGOO	1912000	43054107	0	0	0.0000	30	20	0.98	0.80	1.54
CM015574.1_RaGOO	1913000	43054107	0	0	0.0000	35	19	1.12	0.77	1.83
CM015574.1_RaGOO	1914000	43054107	0	0	0.0000	27	17	0.88	0.69	1.61
CM015574.1_RaGOO	1915000	43054107	0	0	0.0000	21	17	0.69	0.70	1.23
CM015574.1_RaGOO	1916000	43054107	0	0	0.0000	26	28	0.84	1.14	0.93
CM015574.1_RaGOO	1917000	43054107	0	0	0.0000	28	21	0.91	0.85	1.34
CM015574.1_RaGOO	1918000	43054107	0	0	0.0000	25	24	0.80	0.99	1.02
CM015574.1_RaGOO	1919000	43054107	0	0	0.0000	29	20	0.94	0.79	1.49
CM015574.1_RaGOO	1920000	43054107	0	0	0.0000	25	22	0.82	0.88	1.18
CM015574.1_RaGOO	1921000	43054107	0	0	0.0000	24	19	0.78	0.77	1.27
CM015574.1_RaGOO	1922000	43054107	0	0	0.0000	28	18	0.91	0.72	1.59
CM015574.1_RaGOO	1923000	43054107	0	0	0.0000	20	14	0.64	0.56	1.42
CM015574.1_RaGOO	1924000	43054107	0	0	0.0000	23	17	0.75	0.70	1.34
CM015574.1_RaGOO	1925000	43054107	0	0	0.0000	25	21	0.81	0.84	1.22
CM015574.1_RaGOO	1926000	43054107	0	0	0.0000	25	16	0.80	0.66	1.54
CM015574.1_RaGOO	1927000	43054107	0	0	0.0000	22	16	0.71	0.63	1.42
CM015574.1_RaGOO	1928000	43054107	0	0	0.0102	25	13	0.81	0.54	1.89
CM015574.1_RaGOO	1929000	43054107	0	0	0.0000	30	22	0.96	0.88	1.37
CM015574.1_RaGOO	1930000	43054107	0	0	0.0000	29	20	0.92	0.80	1.45
CM015574.1_RaGOO	1931000	43054107	0	0	0.0000	28	21	0.89	0.87	1.29
CM015574.1_RaGOO	1932000	43054107	0	0	0.0000	30	20	0.95	0.81	1.47
CM015574.1_RaGOO	1933000	43054107	0	0	0.0000	25	19	0.80	0.77	1.30
CM015574.1_RaGOO	1934000	43054107	0	0	0.0000	29	25	0.93	1.00	1.17
CM015574.1_RaGOO	1935000	43054107	0	0	0.0000	27	20	0.86	0.82	1.32
CM015574.1_RaGOO	1936000	43054107	0	0	0.0296	30	21	0.98	0.85	1.45
CM015574.1_RaGOO	1937000	43054107	0	0	0.0006	24	21	0.79	0.85	1.17
CM015574.1_RaGOO	1938000	43054107	0	0	0.0000	23	14	0.74	0.56	1.69
CM015574.1_RaGOO	1939000	43054107	0	0	0.0000	31	22	1.01	0.89	1.44
CM015574.1_RaGOO	1940000	43054107	0	0	0.0000	30	26	0.98	1.04	1.19
CM015574.1_RaGOO	1941000	43054107	0	0	0.0000	30	25	0.96	1.01	1.19
CM015574.1_RaGOO	1942000	43054107	0	0	0.0000	24	23	0.79	0.92	1.09
CM015574.1_RaGOO	1943000	43054107	0	0	0.0000	31	23	1.01	0.94	1.35
CM015574.1_RaGOO	1944000	43054107	0	0	0.0000	26	25	0.84	1.02	1.04
CM015574.1_RaGOO	1945000	43054107	0	0	0.0000	23	21	0.73	0.85	1.08
CM015574.1_RaGOO	1946000	43054107	0	0	0.0000	22	23	0.72	0.92	0.98
CM015574.1_RaGOO	1947000	43054107	0	0	0.0000	27	19	0.88	0.77	1.45
CM015574.1_RaGOO	1948000	43054107	0	0	0.0000	34	25	1.10	1.02	1.36
CM015574.1_RaGOO	1949000	43054107	0	0	0.0000	44	34	1.43	1.37	1.32
CM015574.1_RaGOO	1950000	43054107	2	0	0.0323	34	21	1.09	0.85	1.62
CM015574.1_RaGOO	1951000	43054107	0	0	0.0000	33	24	1.05	0.99	1.33
CM015574.1_RaGOO	1952000	43054107	0	0	0.0000	30	26	0.96	1.06	1.15
CM015574.1_RaGOO	1953000	43054107	0	0	0.0000	27	26	0.88	1.06	1.06
CM015574.1_RaGOO	1954000	43054107	0	0	0.0000	24	21	0.78	0.85	1.15
CM015574.1_RaGOO	1955000	43054107	0	0	0.0000	26	22	0.83	0.90	1.16
CM015574.1_RaGOO	1956000	43054107	0	0	0.0000	26	22	0.85	0.89	1.20
CM015574.1_RaGOO	1957000	43054107	0	0	0.0000	24	20	0.76	0.80	1.20
CM015574.1_RaGOO	1958000	43054107	0	0	0.0000	31	26	1.01	1.04	1.23
CM015574.1_RaGOO	1959000	43054107	0	0	0.0000	33	21	1.07	0.87	1.55
CM015574.1_RaGOO	1960000	43054107	0	0	0.0000	31	25	0.99	1.02	1.22
CM015574.1_RaGOO	1961000	43054107	0	0	0.0000	30	25	0.96	1.03	1.17
CM015574.1_RaGOO	1962000	43054107	0	0	0.0000	28	26	0.90	1.06	1.06
CM015574.1_RaGOO	1963000	43054107	0	0	0.0000	30	21	0.96	0.87	1.40
CM015574.1_RaGOO	1964000	43054107	0	0	0.0000	35	23	1.12	0.94	1.51
CM015574.1_RaGOO	1965000	43054107	0	0	0.0000	32	27	1.03	1.10	1.18
CM015574.1_RaGOO	1966000	43054107	0	0	0.0000	28	19	0.90	0.79	1.44
CM015574.1_RaGOO	1967000	43054107	6	0	0.0259	27	22	0.88	0.90	1.24
CM015574.1_RaGOO	1968000	43054107	0	0	0.0000	15	13	0.49	0.52	1.19
CM015574.1_RaGOO	1969000	43054107	0	0	0.0000	23	19	0.73	0.78	1.19
CM015574.1_RaGOO	1970000	43054107	0	0	0.0000	30	22	0.97	0.89	1.37
CM015574.1_RaGOO	1971000	43054107	0	0	0.0000	25	17	0.79	0.70	1.42
CM015574.1_RaGOO	1972000	43054107	0	0	0.0000	23	20	0.75	0.82	1.14
CM015574.1_RaGOO	1973000	43054107	0	0	0.0000	21	15	0.67	0.62	1.35
CM015574.1_RaGOO	1974000	43054107	0	0	0.0000	21	21	0.68	0.85	1.02
CM015574.1_RaGOO	1975000	43054107	0	0	0.0000	21	17	0.69	0.69	1.27
CM015574.1_RaGOO	1976000	43054107	0	0	1.0526	19	15	0.61	0.62	1.24
CM015574.1_RaGOO	1977000	43054107	1	0	0.0000	21	18	0.67	0.72	1.18
CM015574.1_RaGOO	1978000	43054107	0	0	1.1499	14	9	0.46	0.36	1.63
CM015574.1_RaGOO	1979000	43054107	0	0	0.0000	28	34	0.90	1.40	0.81
CM015574.1_RaGOO	1980000	43054107	2	0	0.0000	27	23	0.87	0.94	1.17
CM015574.1_RaGOO	1981000	43054107	0	0	0.0203	25	23	0.81	0.92	1.10
CM015574.1_RaGOO	1982000	43054107	0	0	0.0000	23	23	0.73	0.92	1.01
CM015574.1_RaGOO	1983000	43054107	0	0	0.0335	28	23	0.89	0.95	1.17
CM015574.1_RaGOO	1984000	43054107	0	0	0.0000	29	25	0.95	1.01	1.18
CM015574.1_RaGOO	1985000	43054107	1	0	0.0141	32	29	1.04	1.18	1.11
CM015574.1_RaGOO	1986000	43054107	0	0	0.0000	23	22	0.73	0.88	1.05
CM015574.1_RaGOO	1987000	43054107	0	0	0.0000	27	23	0.87	0.95	1.16
CM015574.1_RaGOO	1988000	43054107	0	0	0.0000	30	17	0.97	0.70	1.75
CM015574.1_RaGOO	1989000	43054107	0	0	0.0000	32	23	1.03	0.94	1.38
CM015574.1_RaGOO	1990000	43054107	0	0	0.0000	29	17	0.93	0.68	1.72
CM015574.1_RaGOO	1991000	43054107	0	0	0.0125	33	23	1.05	0.93	1.43
CM015574.1_RaGOO	1992000	43054107	0	0	0.0000	30	19	0.98	0.76	1.62
CM015574.1_RaGOO	1993000	43054107	0	0	0.0000	25	19	0.80	0.78	1.28
CM015574.1_RaGOO	1994000	43054107	0	0	0.0000	26	23	0.85	0.95	1.12
CM015574.1_RaGOO	1995000	43054107	0	0	0.0021	21	14	0.67	0.57	1.49
CM015574.1_RaGOO	1996000	43054107	0	0	0.0000	29	20	0.93	0.82	1.42
CM015574.1_RaGOO	1997000	43054107	0	0	0.0000	30	22	0.97	0.88	1.38
CM015574.1_RaGOO	1998000	43054107	0	0	0.0000	29	22	0.95	0.91	1.31
[truncated: 955,545 more rows]
