# Supplementary material for: The rise and fall of the ancient northern pike master sex-determining gene
Source: eLife. 2021 Jan 28;10:e62858. doi: 10.7554/eLife.62858 (PMC7870143; doi:10.7554/eLife.62858)
Supplement: Supplementary file 1. — To verify that the two copies of amh were not collapsed into a single sequence during assembly, we computed the total number of apparent heterozygous sites on the amh region in population genomic data with the expectation that the presence of two divergent gene copies should result in high apparent heterozygosity when remapped on the single copy assembled in the genome. In total, 106 variants were observed in the pool of E. lucius males on the amha region located between 12,906,561 bp and 12,909,640 bp on LG08 of E. lucius (GCA_004634155.1: CM015581.1), resulting from the mapping of reads originating from both amha and amhby, while only 12 variants (true allelic variations) were observed in the same region when mapping reads from the female pool originating only from amha. With male Pool-Seq reads from D. pectoralis, we observed only four variant sites on the ~3 kb amh region located between 23,447 bp and 25,910 bp on the flattened_line_2941 contig and zero variant sites from the female Pool-Seq reads. Compared to the ‘control’ of E. lucius Pool-Seq reads where one amh gene from female pool result in 12 variant sites and two amh gene from the male pool result in 106 variant sites, the low number of variant sites in both male and female pool of D. pectoralis support that only one amh gene is present in the genome of D. pectoralis regardless of the phenotypic sex of the individuals. Although sex-specific Pool-Seq reads were not available for U. pygmaea, we performed the same analysis with reads from the single male individual used to assemble the genome. No variant was observed in the ~3 kb region containing amh located between 760,763 bp and 757,962 bp on contig 633485 of our draft genome of U. pygmaea, supporting that only one amh gene is also present in this species. [file elife-62858-supp1.xlsx]

## Sheet: S1
	Number of variants on amha genomeic region
E.lucius male Pool-Seq reads	106
E.lucius female Pool-Seq reads	12
D.pectoralis male Pool-Seq reads	4
D.pectoralis female Pool-Seq reads	0
U.pygmaea male reads	0
