# Supplementary material for: The rise and fall of the ancient northern pike master sex-determining gene
Source: eLife. 2021 Jan 28;10:e62858. doi: 10.7554/eLife.62858 (PMC7870143; doi:10.7554/eLife.62858)
Supplement: Supplementary file 2. — To help estimate the size of the sex locus from sex-specific RAD markers, we determined the number of potential SbfI cleavage sites based on our draft genome assemblies for each species. For E. lucius (Canadian population), E. masquinongy (Iowa population), N. hubbsi, and D. pectoralis, we predicted the number of RAD-Seq cleavage sites present in each genome by counting the number of unambiguous matches for sequence of SbfI (CCTGCAGG), the restriction enzyme used in RAD-Seq library preparation (Herrera et al., 2015). On average, we found 31.8 RAD markers per Mb in E. lucius, 38.4 in E. masquinongy, 41.6 in N. hubbsi, 30.8 in D. pectoralis, and 26.2 in U. pygmaea. Because we do not see large species differences (26–40 RAD markers/Mb) this suggests that, apart from potential local variations of the RAD markers density in sex loci, our RAD-Seq comparative analysis could to some extent be used to compare sex locus size within species on the basis of this number of sex-specific RAD markers. We are aware of the limitation that using the number of sex-specific marker usually lead to an overestimation of the size of the sex locus. For all of our species with the exception of U. pygmaea, we identified very few sex-specific markers, indicating very small sex locus. This simple calculation is only intended to helps provide a rough approximation of the size of the sex locus. [file elife-62858-supp2.xlsx]

## Sheet: Table S2
Dataset	Number of SbfI cleavage sites	Number of RAD marker/Mb	Genome assembly size
E. lucius (Canadian population)	14818	31.8	0.94G
E. masquinongy (US population)	20852	38.4	1.09G
N. hubbsi	15678	41.6	0.76G
D. pectoralis	13158	30.8	0.86G
U. pygmaea	20227	26.2	1.54G
