# Supplementary material for: The rise and fall of the ancient northern pike master sex-determining gene
Source: eLife. 2021 Jan 28;10:e62858. doi: 10.7554/eLife.62858 (PMC7870143; doi:10.7554/eLife.62858)
Supplement: Supplementary file 3. [file elife-62858-supp3.xlsx]

## Sheet: Table S3
Metric	Value
Number of scaffolds	1231
Total size of scaffolds	919922954
Longest scaffold	29788268
Shortest scaffold	517
Number of scaffolds > 1K nt	1225 (99.5.0%)
Number of scaffolds > 10K nt	1103 (89.6%)
Number of scaffolds > 100K nt	665 (54%)
Number of scaffolds > 1M nt	185 ( 15%)
Number of scaffolds > 10M nt	14 (1.1%)
Mean scaffold size	747297
Median scaffold size	127613
N50 scaffold length	3816572
L50 scaffold count	51
scaffold %A	28.98
scaffold %C	20.98
scaffold %G	21.03
scaffold %T	29
scaffold %N	0
Complete BUSCOs	94.4
Complete single-copy BUSCOs	90.9
Complete duplicated BUSCOs	0.035
Fragmented BUSCOs	0.028
Missing BUSCOs	0.028
Complete BUSCOs (ref assembly GCA_004634155.1)	4310 (94.1%)
Complete single-copy BUSCOs (ref assembly GCA_004634155.1)	4142 (90.4%)
Complete duplicated BUSCOs (ref assembly GCA_004634155.1)	168 (3.7%)
Fragmented BUSCOs (ref assembly GCA_004634155.1)	160 (3.5%)
Missing BUSCOs (ref assembly GCA_004634155.1)	114 (2.4%)
