# Supplementary material for: The rise and fall of the ancient northern pike master sex-determining gene
Source: eLife. 2021 Jan 28;10:e62858. doi: 10.7554/eLife.62858 (PMC7870143; doi:10.7554/eLife.62858)
Supplement: Supplementary file 4. [file elife-62858-supp4.xlsx]

## Sheet: Table S4
Model name in PALM	Log-likelihood of the model
M0	-5121.89
M1a	-5123.61
M2	-5123.61
M7	-5123.41
M8	-5123.28
Free-ratio model	-5139.74
Branch-site model	-5122.8
