# Supplementary material for: The rise and fall of the ancient northern pike master sex-determining gene
Source: eLife. 2021 Jan 28;10:e62858. doi: 10.7554/eLife.62858 (PMC7870143; doi:10.7554/eLife.62858)
Supplement: Supplementary file 5. [file elife-62858-supp5.xlsx]

## Sheet: Table S5
	dN/dS ratio (comparing with U.pygmaea amh )
Species	amha	amhby
Dallia pectoralis	0.37	NA
Novumbra hubbsi	0.4301	truncated
Esox niger	0.3732	truncated
Esox americanus americanus	0.3826	0.3579
Esox americanus vermiculatus	0.3933	0.3561
Esox masquinongy	0.3877	0.3808
Esox reichertii	0.3786	0.3797
Esox aquitanicus	0.3706	0.3848
Esox cisalpinus	0.3629	0.3876
Esox lucius	0.3678	0.3804
