# Supplementary material for: The rise and fall of the ancient northern pike master sex-determining gene
Source: eLife. 2021 Jan 28;10:e62858. doi: 10.7554/eLife.62858 (PMC7870143; doi:10.7554/eLife.62858)
Supplement: Supplementary file 6. — *Samples from (Ouellet-Cauchon et al., 2014). **Sex was recorded in this E. masquinongy population based on the urogenital pores morphology. ***Sex was recorded in N. hubbsi based on the specific coloration of males during the breeding season. NR = phenotypes not recorded. NA = not applicable (sex phenotypes not recorded). Museum collection numbers are as follows: MNHN 2014–2719, MNHN 2014–2720, MNHN 2014–2721, MNHN 2014–2722, and MNHN 2014–2723 for E. cisalpinus and MNHN 2013–1246, MNHN 2013–1245, and MNHN 2013–838 for E. aquitanicus. [file elife-62858-supp6.xlsx]

## Sheet: Table S6
Species	Sampling location	Sample collectors	Sexing method	Sampling year	Sample size	Males	Females	Homology cloning	Sex-linkage	RAD-Seq	Pool-Seq	WGS
Esox lucius	France(48°20'10.7"N 1°39'00.6"W)	Y.G., Q.P	Gamete production	2018	221	161	60		✓	✓	✓	✓
Esox lucius	Sweden (unknown)	R.G	Gonad observation	2012	40	20	20		✓
Esox lucius	Poland (53°45′43″N 20°26′44″E)	K.O	Gamete production	2013	40	20	20		✓
Esox lucius	Xinjiang, China (45°55′51.20″N 85°47′42.51″ E)	H.H	Gonad observation	2018	10	5	5		✓
Esox lucius	British Columbia, Canada (56°18'02.4"N 120°58'09.6"W)	B.K., E.R	Gonad observation	2010-2012	20	6	14		✓
Esox lucius	New Jerseys, USA (40°50'24.6"N 74°50'02.7"W)	B.K., E.R	Gamete production	2011-2012	10	3	7		✓
Esox lucius	Manitoba, Canada (49°48'01.7"N 95°10'20.6"W)	B.K., E.R	Gamete production	2010-2013	8	3	5		✓
Esox lucius	Quebec, Canada (45°22'38.5"N 73°48'48.2"W)	L.B	Gamete production	2009-2010	124	62	62		✓	✓	✓
Esox lucius	Alaska, USA(64°54′28.6″N 150°26′51.121″E)	J.A.L	Gonad observation	2018	38	19	19		✓
Esox lucius	Siberia, Russia (58°54'07.5"N 81°32'02.2"E)	V.T., E.A.I	Gonad observation	2020	17	8	9		✓
Esox aquitanicus	France (45°58'54.25" N 0°3'8.646" E)	G.P.J.D	External phenotype	2013	3	1	2	✓	✓
Esox cisalpinus	Italy (44°58'7.19" N 12°32'29.39" E)	G.P.J.D	External phenotype	2014	4	2	2	✓	✓
Esox reichertii	Heilongjiang,China ( 48°36 N 134°29′E)	S.C	Gonad observation	2015	21	11	10		✓
Esox reichertii	*	*	NR	*	10	NA	NA	✓
Esox masquinongy	Iowa, USA (43° 08' 6.60" N 93° 22' 28.79" W)	F.W.G	Gamete production	2015	45	27	18		✓	✓	✓
Esox masquinongy	Quebec, Canada (45°27'06.3"N 73°59'54.6"W)	L.B	External phenotype**	2010-2015	40	20	20		✓	✓		✓
Esox masquinongy	Wisconsin, USA (45°55'36.716" N 91°26'58.221" E)	W.A.L	Gamete production	2002-2013	122	61	61		✓
Esox americanus (americanus)	Mississippi, USA (30°32'39.71"N 88°57'04.77"W)	E.S., S.S.C	Gonad histology	2019	10	6	4		✓
Esox americanus (americanus)	*	*	NR	*	10	NA	NA	✓
Esox americanus (vermiculatus)	*	*	NR	*	11	NA	NA	✓
Esox niger	Quebec, Canada (45°31'08.1"N 71°48'37.2"W)	L.B	Gonad histology	2017	13	5	8		✓			✓
Novumbra hubbsi	Washington, USA (47°04’08.09”N, 122°58’12.77”W)	K.M.N., R.T., P.D	External phenotype***	2010-2012	45	23	22		✓	✓		✓
Dallia pectoralis	Alaska, USA (61° 33' 10.8"N, 149° 14' 56.4"W)	J.H.P., F.v.H	Gonad observation	2014	60	30	30			✓	✓	✓
Umbra pygmaea	Belgium (50°57'18.55"N 5°27'14.03"E)	H.V., Y.G	Gonad observation	2013	62	31	31			✓		✓
