# Supplementary material for: The rise and fall of the ancient northern pike master sex-determining gene
Source: eLife. 2021 Jan 28;10:e62858. doi: 10.7554/eLife.62858 (PMC7870143; doi:10.7554/eLife.62858)
Supplement: Supplementary file 7. [file elife-62858-supp7.xlsx]

## Sheet: Table S7
Species	Sex	Sequencing approach	Format	Instrument	Total number of reads	Estimates genome coverage
Esoc lucius (European population)	male	Pool-Seq	2*150 bp	NovaSeq S4	259000000	~77
Esox lucius (European population)	female	Pool-Seq	2*150 bp	NovaSeq S4	273000000	~80
Esox lucius (Canadian population)	male	Pool-Seq	2*150 bp	NovaSeq S4	281000000	~84
Esox lucius (Canadian population)	female	Pool-Seq	2*150 bp	NovaSeq S4	292000000	~87
Esox masquinongy (US population)	male	Pool-Seq	2*150 bp	NovaSeq S4	195000000	~57
Esox masquinongy (US population)	female	Pool-Seq	2*150 bp	NovaSeq S4	252000000	~75
Dallia pectoralis (Alaska)	male	Pool-Seq	2*150 bp	NovaSeq S4	199000000	~60
Dallia pectoralis (Alaska)	female	Pool-Seq	2*150 bp	NovaSeq S4	280000000	~84
Esox lucius (European population)	male	WGS	2*250 bp	HIseq2500	471000000	~200
Esox masquinongy (US population)	male	WGS	2*250 bp	HIseq2500	232000000	~115
Esox masquinongy (US population)	female	WGS	2*250 bp	HIseq2500	463000000	~200
Esox masquinongy (US population)	female	WGS	2*250 bp	HIseq2500	168000000	~80
Esox niger (Quebec, canada)	male	WGS	2*250 bp	HIseq2500	207000000	~100
Novumbra hubbsi (Washington, USA)	male	WGS	2*250 bp	HIseq2500	225000000	~110
Dallia pectoralis (Alaska)	male	WGS	2*250 bp	HIseq2500	217000000	~110
Umbra pygmaea (Belgium)	male	WGS	2*250 bp	HIseq2500	419000000	~84
