# Supplementary material for: The rise and fall of the ancient northern pike master sex-determining gene
Source: eLife. 2021 Jan 28;10:e62858. doi: 10.7554/eLife.62858 (PMC7870143; doi:10.7554/eLife.62858)
Supplement: Supplementary file 8. — The number of markers retained correspond to the number of markers present with depth higher than min. depth in at least one individual. [file elife-62858-supp8.xlsx]

## Sheet: Table S8
Dataset	Total # of reads	Total # of markers	Average # of markers / individual	Max # of markers	Min # of markers	Min. depth	Retained marker
Dallia pectoralis	115000000	4120000	128000	96200	213000	5	48500
Esox lucius Canadian Quebec	133000000	8440000	213000	136000	435000	5	168000
Esox lucius Canadian British Columbia	112000000	4530000	181000	60800	334000	5	139000
Esox masquinongy Quebec	146000000	12900000	429000	234000	634000	5	249000
Esox masquinongy Iowa	171000000	15700000	405000	40400	733000	5	309000
Novumbra hubbsi	215000000	14700000	416000	27400	680000	5	183000
Umbra pygmaea	154000000	6500000	209000	169000	262000	5	4530000
