# Supplementary material for: The rise and fall of the ancient northern pike master sex-determining gene
Source: eLife. 2021 Jan 28;10:e62858. doi: 10.7554/eLife.62858 (PMC7870143; doi:10.7554/eLife.62858)
Supplement: Supplementary file 9. [file elife-62858-supp9.xlsx]

## Sheet: Table S9
Primer name	Sequence	Sequence used for primer design
SeqAMH1Fw1	GAAAGACACTGGCTCACAG	E. lucius amhby
SeqAMH1Fw2	TGGCACCATCTCTTTCAC	E. lucius amhby
SeqAMH1Fw3	TCCAGTCCCGTTGTTCTC	E. lucius amhby
SeqAMH1Fw4	CAACATGGTGGCAACTAAGTG	E. lucius amhby
SeqAMH1Rev1	TTTCCCTCTGATGGCATTCC	E. lucius amhby
SeqAMH1Rev2	CTGTTGGTGGTTCTTTGC	E. lucius amhby
SeqAMH1Rev3	TGGCAGTGGAAGATATTAGC	E. lucius amhby
SeqAMH1Rev4	GGTAATATTTGTGCCCTGTG	E. lucius amhby
seqAMH2_Fw1	TGTTAGATGCAGACGTGAG	E. lucius amhby
seqAMH2_Rev1	CACTTTCCTTGTCCCAACC	E. lucius amhby
seqAMH2_Fw2	CCATCGTTCCCAACACTTCTC	E. lucius amhby
seqAMH2_Rev2	AGGACATCACTGAGGAACC	E. lucius amhby
seqAMH2_Fw3	GTAATTGTCTCCATCAGAGCGT	E. lucius amhby
seqAMH2_Rev3	CACTCACACTTCGTTGCCAC	E. lucius amhby
ConserveAMH1_F1	GTTACTTTTTCTGCCTAGCGTGA	Conserved region on amhby orthologs
ConserveAMH1_F2	GTGATAGGCACTGTAACACACCA	Conserved region on amhby orthologs
ConserveAMH1_R1	CTATTACTAGTGTGGATAAGGCCG	Conserved region on amhby orthologs
ConserveAMH1_R2	CCTCTTCACCCTCAGTGAGC	Conserved region on amhby orthologs
Con_Amha_F1	GTCACTATAGGTTGGTTCATC	Conserved region on amha orthologs
Con_Amha_R1	CGATTTGCCATTTCAGGTG	Conserved region on amha orthologs
Con_Amha_F2	CACGATCTGCAGCCTTACAA	Conserved region on amha orthologs
Con_Amha_R2	CTTCAGTAGTAGCAGGGCACG	Conserved region on amha orthologs
ESAA_Amhby_gapF1	TAGTAACGGCCTTATCCACAC	E. americanus amhby
ESAA_Amhby_gapR1	GGCAGGAGTCATGTATCAACAG	E. americanus amhby
ESAA_Amhby_spcR1	GTCACAGCTAAATCAGGTCAC	E. americanus amhby
Novum_Amha_F1	GTTTATTCAACTGATGTGGGAC	N. hubbsi amha
Novum_Amha_R1	GAAAGCATATCGTCAACAACC	N. hubbsi amha
Novum_Amhby_F1	CAAGATGCCAACAAACAGAG	N. hubbsi amhby
Novum_Amhby_R1	TATGGATAATAGCCTGAACCTG	N. hubbsi amhby
