# Supplementary material for: The rise and fall of the ancient northern pike master sex-determining gene
Source: eLife. 2021 Jan 28;10:e62858. doi: 10.7554/eLife.62858 (PMC7870143; doi:10.7554/eLife.62858)
Supplement: Supplementary file 10. [file elife-62858-supp10.xlsx]

## Sheet: Table S10
Assembly	Sex	Scaffolds	Total scaffold size	Longest scaffold	Mean scaffold size	Median scaffold size	N50 (Kb)	L50	Complete BUSCOs (%)	Single-copy BUSCOs (%)	Missing BUSCOs (%)
Dallia pectoralis	Male	989835	0.86 G	190332	864	255	5.08	30350	65.1	62.9	17
Esox masquinongy	Male	483942	1.09 G	376038	2260	259	32.5	8594	80	77.3	8.7
Esox masquinongy	Female	660189	1.14 G	381697	1728	245	33.4	8502	80.7	77.8	8.8
Esox niger	Male	331978	0.86 G	384029	2590	248	35.1	6261	81.7	78.6	8.3
Novumbra hubbsi	Male	396170	0.76 G	481803	1909	259	28	6674	78.5	76.2	10.1
Umbra pygmaea	Male	1757182	1.95G	202595	1110	244	8.82	47154	64.9	62.6	17.7
